# Supplementary material for: Siniperca chuatsi Rhabdovirus (SCRV)-Induced Key Pathways and Major Antiviral Genes in Fish Cells
Source: MDPI journal article supplement (doi:10.3390/microorganisms10122464), 2022-12-13
Supplement: s1 [file s1]

Table S6. Enriched DEGs in Cytokine-cytokine receptor interaction pathway

| gene              | Possible function/pathway                            | Expression change fold (log <sub>2</sub> FC) |       |       |       |
|-------------------|------------------------------------------------------|----------------------------------------------|-------|-------|-------|
|                   |                                                      | 3 h                                          | 12 h  | 24 h  | 36 h  |
| bmp16             | TGF_BETA_2 domain-containing protein                 |                                              |       | -1.16 | -1.38 |
| bmp6              | Bone morphogenetic protein 6                         |                                              | -1.28 | -1.27 | -1.29 |
| bmpr1ba           | Bone morphogenetic protein receptor type-1Ba         |                                              |       | -1.39 | -2.01 |
| tgfb3             | Transforming growth factor beta-3 proprotein         |                                              | -1.39 | -1.71 | -2.07 |
| ccl44             | C-C motif                                            |                                              |       | -1.88 | -2.66 |
| cxcl12b           | C-X-C motif chemokine 12                             |                                              |       | -1.35 | -2.10 |
| gdf10b            | Growth/differentiation factor 10                     |                                              |       | -1.03 | -1.55 |
| il11a             | Interleukin 11a                                      | -1.21                                        | -1.34 | -1.85 | -1.88 |
| il15l             | Interleukin-15                                       |                                              | -1.35 | -1.93 | -2.35 |
| LOC122872036      | Inhibin beta B chain                                 |                                              | -1.72 | -2.01 | -2.86 |
| LOC122872371      | Activin receptor type-2A                             |                                              |       | -1.11 | -1.50 |
| LOC122874983      | Intercrine alpha family (small cytokine C-X-C)       |                                              |       |       | -1.78 |
| mpl               | Thrombopoietin receptor                              |                                              | -1.44 | -1.57 | -1.47 |
| osmr              | Oncostatin-M-specific receptor subunit beta          |                                              |       |       | -1.58 |
| LOC122880389      | C-X-C motif chemokine 11-like                        |                                              |       |       | 7.76  |
| LOC122888056      | C-X-C motif chemokine 6-like                         |                                              |       |       | 6.91  |
| LOC122875308      | C-C motif chemokine 4                                |                                              |       |       | 4.51  |
| LOC122875929      | C-X-C motif chemokine 10                             |                                              |       |       | 3.28  |
| LOC122884604      | C-X-C motif chemokine 9                              |                                              |       |       | 3.21  |
| LOC122873767      | Interleukin-8                                        |                                              |       |       | 3.16  |
| LOC122881975      | C-X-C chemokine receptor type 3-like                 |                                              |       |       | 2.84  |
| LOC122876711      | Interleukin-1 beta                                   |                                              |       |       | 2.44  |
| LOC122881976      | C-X-C chemokine receptor type 3-like                 |                                              |       |       | 1.88  |
| LOC122883012      | Tumor necrosis factor receptor superfamily member 5  |                                              |       |       | 1.72  |
| LOC122885641      | C-X-C chemokine receptor type 2                      |                                              |       |       | 1.71  |
| il12rb2l          | Interleukin 12 receptor, beta 2a, like               |                                              |       |       | 1.53  |
|                   | Interleukin-6 receptor subunit beta                  |                                              |       |       |       |
| il15ra            | Interleukin-15 receptor subunit alpha                |                                              |       |       | 1.49  |
| il12ba            | Interleukin-12 subunit beta                          |                                              |       |       | 1.45  |
| bmpr1bb           | Bone morphogenetic protein receptor type-1Bb         |                                              |       |       | 1.44  |
| si:ch211-112c15.8 | Tumor necrosis factor receptor superfamily member 1A |                                              |       |       | 1.21  |
| lepr              | Leptin receptor                                      |                                              |       |       | 1.16  |
| LOC122883385      | Interleukin-17 receptor E                            |                                              |       |       | 1.16  |
| csflra            | Macrophage colony-stimulating factor 1 receptor 1    |                                              |       |       | 1.14  |
