# Supplementary material for: Siniperca chuatsi Rhabdovirus (SCRV)-Induced Key Pathways and Major Antiviral Genes in Fish Cells
Source: MDPI journal article supplement (doi:10.3390/microorganisms10122464), 2022-12-13
Supplement: s1 [file s1]

Table S7. Enriched DEGs related to PRR, IRF, and ISG

|     | gene         | protein                                                                           | Expression change fold (log2FC) |      |      |      |
|-----|--------------|-----------------------------------------------------------------------------------|---------------------------------|------|------|------|
|     |              |                                                                                   | 3 h                             | 12 h | 24 h | 36 h |
|     | dhx58        | Probable ATP-dependent RNA helicase DHX58 (LGP2)                                  |                                 |      | 2.37 | 4.42 |
| PRR | ifih1        | Interferon-induced helicase C domain-containing protein 1 (MDA5)                  |                                 |      | 1.06 | 2.05 |
|     | nlr5         | NOD-like receptor C5                                                              |                                 |      | 3.28 | 4.61 |
|     | ptx3a        | Pentraxin-related protein PTX3                                                    |                                 |      | 2.32 | 2.72 |
|     | irf1b        | Interferon regulatory factor 1                                                    |                                 | 1.60 | 2.29 | 2.46 |
|     | irf3         | Interferon regulatory factor 3                                                    |                                 | 1.22 | 2.03 | 2.89 |
| IRF | irf7         | Interferon regulatory factor 7                                                    |                                 |      |      | 1.57 |
|     | irf9         | Interferon regulatory factor 9                                                    |                                 |      |      | 1.11 |
|     | Irf10        | Interferon regulatory factor 10                                                   |                                 |      |      | 2.01 |
|     | LOC122871629 | E3 ubiquitin/ISG15 ligase TRIM25                                                  |                                 |      | 4.64 |      |
|     | spock2       | Testican-2 (IFN induced)                                                          |                                 |      | 4.02 |      |
|     | LOC122868453 | Interferon-induced protein 44                                                     |                                 |      | 3.7  |      |
|     | LOC122878108 | Interferon-induced protein 44                                                     |                                 |      | 3.00 | 5.26 |
|     | LOC122878107 | Interferon-induced protein 44                                                     |                                 |      |      | 4.76 |
|     | rsad2        | Radical S-adenosyl methionine domain-containing protein 2 (IFN induced) (Viperin) |                                 |      | 3.32 | 4.07 |
| ISG | LOC122862285 | Interferon-induced GTP-binding protein Mx                                         |                                 |      | 3.27 |      |
|     | LOC122878212 | interferon-induced protein with tetratricopeptide repeats 1-like                  |                                 |      | 2.48 | 5.19 |
|     | LOC122868174 | Interferon-induced protein with tetratricopeptide repeats 5-like                  |                                 |      |      | 1.35 |
|     | ifi35        | Interferon-induced 35 kDa protein homolog                                         |                                 |      |      | 2.30 |
|     | LOC122869735 | Erythroid membrane-associated protein E3 ubiquitin-protein ligase TRIM21          |                                 |      | 4.27 | 6.87 |
