# Supplementary material for: Siniperca chuatsi Rhabdovirus (SCRV)-Induced Key Pathways and Major Antiviral Genes in Fish Cells
Source: MDPI journal article supplement (doi:10.3390/microorganisms10122464), 2022-12-13
Supplement: s1 [file s1]

Table S1 The genes and primers used in RT-qPCR, gene cloning, and overexpression assays in the study.

| Gene                 | Primers (5'-3')                                | application  |
|----------------------|------------------------------------------------|--------------|
| CXCL6                | TGTCACCCTAAAGAGGGGCT<br>GCTCAGTTGGTCTGGCTGTA   | RT-qPCR      |
| IL8                  | GAGAGCAAACCCATAGGCCG<br>TGGGTCCAGGCAAACCTCTT   |              |
| CXCL9                | GAGCTCACGGTCTACCCAAA<br>TCACGACCCAACCTATGAGC   |              |
| CXCL10               | TTTCTCACCTGCCTGCTTGT<br>TGACTGGCTCTGCCTTGATG   |              |
| CXCL11               | TGTGTAATCGTGTGAGGAGCAA<br>CCAGGCAATAACGAAGGCTG |              |
| IL11a                | CATCTCCAGTACCACAGCGG<br>CAAATGCATGCTCCCTCAGC   |              |
| IL12ba               | ACTGTATTCCCGGGATAGCG<br>AGTCCAGTGGCTCGTAGGAT   |              |
| IL15                 | GCCCCTGACTTGAAGTGGTT<br>CCTTGAACGGTCTCCCACTC   |              |
| CXCR2                | ACACCGCACCCTTTGTAGT<br>ACTGTGAAGCAGGCCCATAC    |              |
| IRF1b                | GGGGGTTCTGAGCAATGAA<br>AAGCTGTTCCAGAGGTCGTC    |              |
| IRF3                 | AGAATCCACTGCCAACCAGG<br>GCAACGCGTGTCTACCAATC   |              |
| IRF7                 | CCCATGGAAGCACAACCTCA<br>TTTCCACCTGGCCTTGTCAG   |              |
| IRF9                 | ATCTCCGAGCCCTACAAGGT<br>CATCGTCGCTCTCCGATTCA   |              |
| IRF10                | TGTCCCCTTGGGAAACGAAC<br>ACACCCCTCTCCAGATGACA   |              |
| Spock2               | CTGCGATGAGGACGGCTATT<br>CCACGAATCCTAGATCCGGC   |              |
| IFI44                | TCCATAGGTGATCTCAGCATAGC                        |              |
| LOC122878107         | AGGAGAATCCGAGCCTGAGT                           |              |
| IFI44                | CCAGCATGGCTACAAACGTC                           |              |
| LOC122878108         | GAATCCGAGCCTGAGTCACC                           |              |
| Viperin              | AGCCTGCAAGGGAACAACCT<br>AAGTTTGAGGCCCCTCTTGG   |              |
| IFI35                | CAGCGCTCCTACAAAGACCA<br>CTGTGACCCCATGAACACA    |              |
| IFIT1                | ACCAGCCAAGTCATAGGGTT<br>AGTGAACGGCGAGGTACAAG   |              |
| IFIT5                | CAGCACTCGACTACAGGACC<br>TTGAGAAGTGACACCGCCTC   |              |
| SCSC- $\beta$ -actin | GAGAGGGAAATCGTGCGTGA<br>CATACCGAGGAAGGAAGGCTG  |              |
| FHM- $\beta$ -actin  | GAATCCCAAAGCCAACAG<br>GGAAGAGCATAACCCCTCATAG   |              |
| IFI44                | ATGGATGAACGAAATAAATACAGCTTCAATGG               | Gene cloning |

|              |                                            |                |
|--------------|--------------------------------------------|----------------|
| LOC122878107 | TTAGTCTATCTTTGTCCCTGTGTATTGTGG             |                |
| IFI44        | ATGCAGAATCAAACCTGGATCTGGATTCTCG            |                |
| LOC122878108 | TTAGTCTATCTTTGTCCCTGTGTATTGTGG             |                |
| Viperin      | ATGCAGTTCTCCCCTGTGGTC                      |                |
|              | TCACCACTGCAGCTTCATGTTGGCT                  |                |
| IFI35        | ATGTCTTCAGATGAGGATTCTCTATAGTG              |                |
|              | CTACTCTCCGTTTGGTGAGACGC                    |                |
| IFIT1        | ATGATGAGTGCTGCTCAGAGTCCGAC                 |                |
|              | CTATGGCTCTTGCAGGTTGGCCAGA                  |                |
| IFIT5        | ATGAGCAGCACTCTTCACTCCAGACTG                |                |
|              | TCATCCCTGCAGCTCCATGCGCAGCTC                |                |
| IFI44        | CGCTGAATTCTGCAGATATATGGATGAACGAAATAAATACAG | Overexpression |
| LOC122878107 | CGCCACTGTGCTGGATATTTAGTCTATCTTTGTCCCTG     |                |
| IFI44        | CGCTGAATTCTGCAGATATATGCAGAATCAAACCTGGATC   |                |
| LOC122878108 | CGCCACTGTGCTGGATATTTAGTCTATCTTTGTCCCTG     |                |
| Viperin      | CGCTGAATTCTGCAGATATATGCAGTTCTCCCCTGTG      |                |
|              | CGCCACTGTGCTGGATATTCACCACTGCAGCTTCATG      |                |
| IFI35        | CGCTGAATTCTGCAGATATATGTCTTCAGATGAGGATTTC   |                |
|              | CGCCACTGTGCTGGATATCTACTCTCCGTTTGGTGAG      |                |
| IFIT1        | CGCTGAATTCTGCAGATATATGATGAGTGCTGCTCAG      |                |
|              | CGCCACTGTGCTGGATATCTATGGCTCTTGCAGGTTG      |                |
| IFIT5        | CGCTGAATTCTGCAGATATATGAGCAGCACTCTTCACTC    |                |
|              | CGCCACTGTGCTGGATATTCATCCCTGCAGCTCCAT       |                |
| SCRV-RT-F    | GGGCTGGATGATAGACGATTG                      | RT-qPCR        |
| SCRV-RT-R    | TGGCGGAGGTGCTTGATATGG                      |                |

---
