# Supplementary material for: Siniperca chuatsi Rhabdovirus (SCRV)-Induced Key Pathways and Major Antiviral Genes in Fish Cells
Source: MDPI journal article supplement (doi:10.3390/microorganisms10122464), 2022-12-13
Supplement: s1 [file s1]

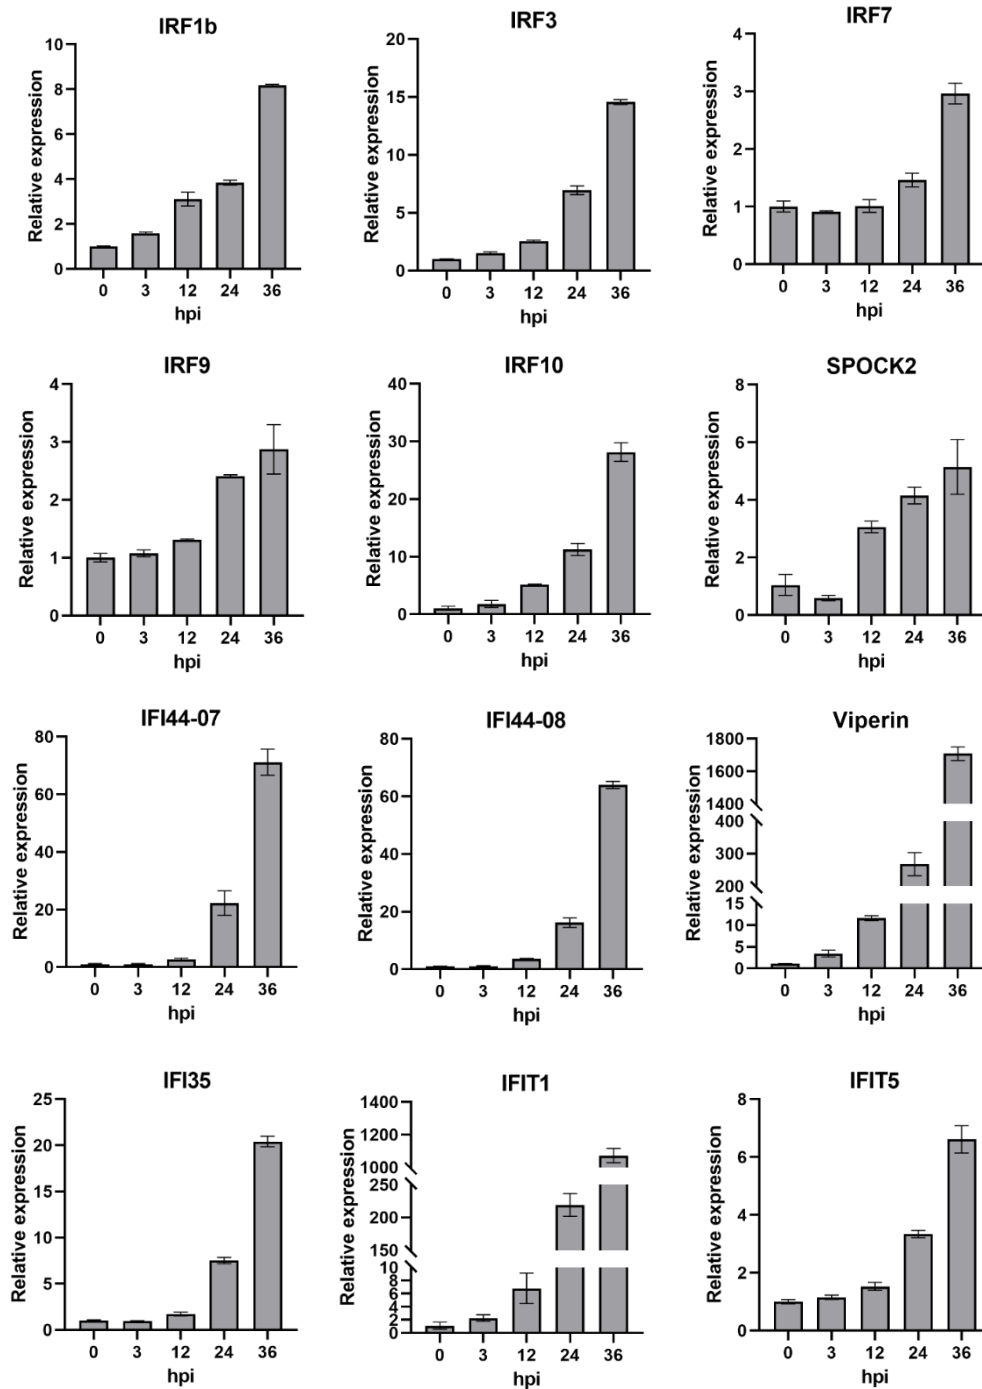

**Figure S2.** Expression of representative DEGs related to IFN signaling pathway in SCRV infected SCSC cells revealed by RT-qPCR. Expression level at 0 hpi was set as 1 in each figure.
