# Supplementary material for: Siniperca chuatsi Rhabdovirus (SCRV)-Induced Key Pathways and Major Antiviral Genes in Fish Cells
Source: Microorganisms. 2022 Dec 13;10(12):2464. doi: 10.3390/microorganisms10122464 (PMC9788611; doi:10.3390/microorganisms10122464)
Supplement: Supplementary file 1 [file microorganisms-10-02464-s001.zip]

Archive with 9 entries (9 files):
- Figure S1.pdf
- Figure S2 Expression of representative DEGs related to IFN signaling pathway in SCRV infected SCSC cells revealed by RT-qPCR.pdf
- Table S1 genes and primers used in RT-qPCR.pdf
- Table S2. S0_vs_S3.GO.enrichment.xls
- Table S3. S0_vs_S12.GO.enrichment.xls
- Table S4. S0_vs_S24.GO.enrichment.xls
- Table S5. S0_vs_S36.GO.enrichment.xls
- Table S6. Enriched DEGs in cytokine and cytokine receptor pathway.pdf
- Table S7. Enriched DEGs related to PRR, IRF, and ISG.pdf
