# Supplementary material for: Siniperca chuatsi Rhabdovirus (SCRV)-Induced Key Pathways and Major Antiviral Genes in Fish Cells
Source: Microorganisms. 2022 Dec 13;10(12):2464. doi: 10.3390/microorganisms10122464 (PMC9788611; doi:10.3390/microorganisms10122464)
Supplement: Supplementary file 1 [file microorganisms-10-02464-s001.zip › Table S2. S0_vs_S3.GO.enrichment.xls]

ONTOLOGY	ID	Description	GeneRatio	BgRatio	pvalue	p.adjust	geneID	Count	GeneName	Up_count	Up_geneID	Down_count
BP	GO:0009887	animal organ morphogenesis	5/23	264/11595	0.00014161998387057	0.0195872142460452	gene-znf703/gene-egr1/gene-snai2/gene-id2a/gene-pthlha	5	egr1/id2a/pthlha/snai2/znf703	0	-	5
BP	GO:0071363	cellular response to growth factor stimulus	4/23	142/11595	0.000159312313900002	0.0195872142460452	gene-LOC122863684/gene-snai2/gene-id2a/gene-smad7	4	id2a/LOC122863684/smad7/snai2	0	-	4
BP	GO:0070848	response to growth factor	4/23	143/11595	0.000163681456095085	0.0195872142460452	gene-LOC122863684/gene-snai2/gene-id2a/gene-smad7	4	id2a/LOC122863684/smad7/snai2	0	-	4
BP	GO:1905269	positive regulation of chromatin organization	2/23	12/11595	0.00024543959864424	0.0220282039783205	gene-znf703/gene-snai2	2	snai2/znf703	0	-	2
BP	GO:0048592	eye morphogenesis	3/23	68/11595	0.000314134577236784	0.0225548626456011	gene-znf703/gene-egr1/gene-id2a	3	egr1/id2a/znf703	0	-	3
BP	GO:2001252	positive regulation of chromosome organization	2/23	15/11595	0.000389060512709698	0.023278787343797	gene-znf703/gene-snai2	2	snai2/znf703	0	-	2
BP	GO:0072331	signal transduction by p53 class mediator	2/23	17/11595	0.00050271105157304	0.0235990270473177	gene-snai2/gene-cdkn1d	2	cdkn1d/snai2	1	gene-cdkn1d	1
BP	GO:0007178	transmembrane receptor protein serine/threonine kinase signaling pathway	3/23	81/11595	0.000525883611082289	0.0235990270473177	gene-LOC122863684/gene-id2a/gene-smad7	3	id2a/LOC122863684/smad7	0	-	3
BP	GO:0071495	cellular response to endogenous stimulus	4/23	207/11595	0.000669396726212546	0.0267014916344782	gene-LOC122863684/gene-snai2/gene-id2a/gene-smad7	4	id2a/LOC122863684/smad7/snai2	0	-	4
BP	GO:0090596	sensory organ morphogenesis	3/23	99/11595	0.000944529182865975	0.0311670655624757	gene-znf703/gene-egr1/gene-id2a	3	egr1/id2a/znf703	0	-	3
BP	GO:0048598	embryonic morphogenesis	4/23	232/11595	0.00102525998466812	0.0311670655624757	gene-snai1a/gene-znf703/gene-egr1/gene-pthlha	4	egr1/pthlha/snai1a/znf703	0	-	4
BP	GO:0009719	response to endogenous stimulus	4/23	233/11595	0.00104179606336966	0.0311670655624757	gene-LOC122863684/gene-snai2/gene-id2a/gene-smad7	4	id2a/LOC122863684/smad7/snai2	0	-	4
BP	GO:0031056	regulation of histone modification	2/23	26/11595	0.00118835903998993	0.0328169919504913	gene-znf703/gene-snai2	2	snai2/znf703	0	-	2
BP	GO:1902275	regulation of chromatin organization	2/23	30/11595	0.00158292057139696	0.0381844194146681	gene-znf703/gene-snai2	2	snai2/znf703	0	-	2
BP	GO:0001837	epithelial to mesenchymal transition	2/23	31/11595	0.00169004910503439	0.0381844194146681	gene-snai1a/gene-snai2	2	snai1a/snai2	0	-	2
BP	GO:0048562	embryonic organ morphogenesis	3/23	123/11595	0.0017667102598738	0.0381844194146681	gene-znf703/gene-egr1/gene-pthlha	3	egr1/pthlha/znf703	0	-	3
BP	GO:0043010	camera-type eye development	3/23	124/11595	0.00180817584971966	0.0381844194146681	gene-znf703/gene-egr1/gene-id2a	3	egr1/id2a/znf703	0	-	3
BP	GO:0007179	transforming growth factor beta receptor signaling pathway	2/23	38/11595	0.00253360279802867	0.0454781702246146	gene-LOC122863684/gene-smad7	2	LOC122863684/smad7	0	-	2
BP	GO:0071559	response to transforming growth factor beta	2/23	38/11595	0.00253360279802867	0.0454781702246146	gene-LOC122863684/gene-smad7	2	LOC122863684/smad7	0	-	2
BP	GO:0071560	cellular response to transforming growth factor beta stimulus	2/23	38/11595	0.00253360279802867	0.0454781702246146	gene-LOC122863684/gene-smad7	2	LOC122863684/smad7	0	-	2
BP	GO:0001501	skeletal system development	3/23	142/11595	0.00266130159191415	0.0454955843570086	gene-egr1/gene-snai2/gene-pthlha	3	egr1/pthlha/snai2	0	-	3
BP	GO:0033044	regulation of chromosome organization	2/23	42/11595	0.00308811985225247	0.0473751044731424	gene-znf703/gene-snai2	2	snai2/znf703	0	-	2
BP	GO:0001654	eye development	3/23	151/11595	0.00316713790349698	0.0473751044731424	gene-znf703/gene-egr1/gene-id2a	3	egr1/id2a/znf703	0	-	3
BP	GO:0150063	visual system development	3/23	151/11595	0.00316713790349698	0.0473751044731424	gene-znf703/gene-egr1/gene-id2a	3	egr1/id2a/znf703	0	-	3
BP	GO:0071310	cellular response to organic substance	4/23	330/11595	0.00371744866973522	0.0533825628973978	gene-LOC122863684/gene-snai2/gene-id2a/gene-smad7	4	id2a/LOC122863684/smad7/snai2	0	-	4
BP	GO:0001503	ossification	2/23	52/11595	0.00469901994363566	0.0600092263930989	gene-snai2/gene-pthlha	2	pthlha/snai2	0	-	2
BP	GO:0030178	negative regulation of Wnt signaling pathway	2/23	52/11595	0.00469901994363566	0.0600092263930989	gene-LOC122884881/gene-snai2	2	LOC122884881/snai2	0	-	2
BP	GO:0048701	embryonic cranial skeleton morphogenesis	2/23	53/11595	0.00487742408238622	0.0600092263930989	gene-egr1/gene-pthlha	2	egr1/pthlha	0	-	2
BP	GO:0048704	embryonic skeletal system morphogenesis	2/23	53/11595	0.00487742408238622	0.0600092263930989	gene-egr1/gene-pthlha	2	egr1/pthlha	0	-	2
BP	GO:0048880	sensory system development	3/23	183/11595	0.00542851360157301	0.0600092263930989	gene-znf703/gene-egr1/gene-id2a	3	egr1/id2a/znf703	0	-	3
BP	GO:0048593	camera-type eye morphogenesis	2/23	56/11595	0.00543118899245411	0.0600092263930989	gene-znf703/gene-egr1	2	egr1/znf703	0	-	2
BP	GO:0048568	embryonic organ development	3/23	185/11595	0.00559500158182782	0.0600092263930989	gene-znf703/gene-egr1/gene-pthlha	3	egr1/pthlha/znf703	0	-	3
BP	GO:0045892	negative regulation of transcription, DNA-templated	3/23	186/11595	0.00567939320272837	0.0600092263930989	gene-znf703/gene-snai2/gene-id2a	3	id2a/snai2/znf703	0	-	3
BP	GO:1902679	negative regulation of RNA biosynthetic process	3/23	188/11595	0.00585048168177845	0.0600092263930989	gene-znf703/gene-snai2/gene-id2a	3	id2a/snai2/znf703	0	-	3
BP	GO:1903507	negative regulation of nucleic acid-templated transcription	3/23	188/11595	0.00585048168177845	0.0600092263930989	gene-znf703/gene-snai2/gene-id2a	3	id2a/snai2/znf703	0	-	3
BP	GO:0051253	negative regulation of RNA metabolic process	3/23	193/11595	0.00629174106165776	0.0627426400315315	gene-znf703/gene-snai2/gene-id2a	3	id2a/snai2/znf703	0	-	3
BP	GO:0048706	embryonic skeletal system development	2/23	63/11595	0.00683001285462714	0.064525647758188	gene-egr1/gene-pthlha	2	egr1/pthlha	0	-	2
BP	GO:1904888	cranial skeletal system development	2/23	63/11595	0.00683001285462714	0.064525647758188	gene-egr1/gene-pthlha	2	egr1/pthlha	0	-	2
BP	GO:0048762	mesenchymal cell differentiation	2/23	65/11595	0.00725669349736918	0.0661037900556734	gene-snai1a/gene-snai2	2	snai1a/snai2	0	-	2
BP	GO:0009790	embryo development	4/23	404/11595	0.00759996029778692	0.0661037900556734	gene-snai1a/gene-znf703/gene-egr1/gene-pthlha	4	egr1/pthlha/snai1a/znf703	0	-	4
BP	GO:0048705	skeletal system morphogenesis	2/23	67/11595	0.00769521124581035	0.0661037900556734	gene-egr1/gene-pthlha	2	egr1/pthlha	0	-	2
BP	GO:0045934	negative regulation of nucleobase-containing compound metabolic process	3/23	208/11595	0.007733591037154	0.0661037900556734	gene-znf703/gene-snai2/gene-id2a	3	id2a/snai2/znf703	0	-	3
BP	GO:0070887	cellular response to chemical stimulus	4/23	410/11595	0.00799983117238441	0.0667892881601396	gene-LOC122863684/gene-snai2/gene-id2a/gene-smad7	4	id2a/LOC122863684/smad7/snai2	0	-	4
BP	GO:0048511	rhythmic process	2/23	70/11595	0.00837498111714309	0.0683322322966902	gene-LOC122878475/gene-egr1	2	egr1/LOC122878475	1	gene-LOC122878475	1
BP	GO:0007423	sensory organ development	3/23	219/11595	0.00890602298724918	0.0710502722760546	gene-znf703/gene-egr1/gene-id2a	3	egr1/id2a/znf703	0	-	3
BP	GO:2000113	negative regulation of cellular macromolecule biosynthetic process	3/23	222/11595	0.00924299219303823	0.0712035662327982	gene-znf703/gene-snai2/gene-id2a	3	id2a/snai2/znf703	0	-	3
BP	GO:0007219	Notch signaling pathway	2/23	74/11595	0.00932191535638306	0.0712035662327982	gene-snai2/gene-id2a	2	id2a/snai2	0	-	2
BP	GO:0010558	negative regulation of macromolecule biosynthetic process	3/23	225/11595	0.0095874118683021	0.0717058512650095	gene-znf703/gene-snai2/gene-id2a	3	id2a/snai2/znf703	0	-	3
BP	GO:0051726	regulation of cell cycle	3/23	235/11595	0.0107897423658244	0.0775939331490633	gene-rgcc/gene-id2a/gene-cdkn1d	3	cdkn1d/id2a/rgcc	1	gene-cdkn1d	2
BP	GO:0007346	regulation of mitotic cell cycle	2/23	80/11595	0.0108277920078443	0.0775939331490633	gene-id2a/gene-cdkn1d	2	cdkn1d/id2a	1	gene-cdkn1d	1
BP	GO:0016570	histone modification	2/23	81/11595	0.0110885998153573	0.0775939331490633	gene-znf703/gene-snai2	2	snai2/znf703	0	-	2
BP	GO:0031327	negative regulation of cellular biosynthetic process	3/23	239/11595	0.0112942465107954	0.0775939331490633	gene-znf703/gene-snai2/gene-id2a	3	id2a/snai2/znf703	0	-	3
BP	GO:0060485	mesenchyme development	2/23	83/11595	0.0116185398042956	0.0775939331490633	gene-snai1a/gene-snai2	2	snai1a/snai2	0	-	2
BP	GO:0016569	covalent chromatin modification	2/23	84/11595	0.011887649925344	0.0775939331490633	gene-znf703/gene-snai2	2	snai2/znf703	0	-	2
BP	GO:0060041	retina development in camera-type eye	2/23	84/11595	0.011887649925344	0.0775939331490633	gene-egr1/gene-id2a	2	egr1/id2a	0	-	2
BP	GO:0009890	negative regulation of biosynthetic process	3/23	246/11595	0.0122098488612362	0.0782738525211391	gene-znf703/gene-snai2/gene-id2a	3	id2a/snai2/znf703	0	-	3
BP	GO:0001667	ameboidal-type cell migration	2/23	88/11595	0.0129914352586944	0.0804125044460566	gene-snai1a/gene-snai2	2	snai1a/snai2	0	-	2
BP	GO:0048732	gland development	2/23	88/11595	0.0129914352586944	0.0804125044460566	gene-snai2/gene-id2a	2	id2a/snai2	0	-	2
BP	GO:0010033	response to organic substance	4/23	475/11595	0.0132547303221553	0.0806516641636228	gene-LOC122863684/gene-snai2/gene-id2a/gene-smad7	4	id2a/LOC122863684/smad7/snai2	0	-	4
BP	GO:0007167	enzyme linked receptor protein signaling pathway	3/23	257/11595	0.013733535104614	0.0821723183759402	gene-LOC122863684/gene-id2a/gene-smad7	3	id2a/LOC122863684/smad7	0	-	3
BP	GO:0042981	regulation of apoptotic process	3/23	261/11595	0.0143135299724377	0.0829934183367541	gene-snai2/gene-trim69/gene-phlda1	3	phlda1/snai2/trim69	1	gene-trim69	2
BP	GO:0010638	positive regulation of organelle organization	2/23	93/11595	0.0144318765934897	0.0829934183367541	gene-znf703/gene-snai2	2	snai2/znf703	0	-	2
BP	GO:0043067	regulation of programmed cell death	3/23	264/11595	0.0147576538221228	0.0829934183367541	gene-snai2/gene-trim69/gene-phlda1	3	phlda1/snai2/trim69	1	gene-trim69	2
BP	GO:0030111	regulation of Wnt signaling pathway	2/23	95/11595	0.015026663487156	0.0829934183367541	gene-LOC122884881/gene-snai2	2	LOC122884881/snai2	0	-	2
BP	GO:0045786	negative regulation of cell cycle	2/23	95/11595	0.015026663487156	0.0829934183367541	gene-id2a/gene-cdkn1d	2	cdkn1d/id2a	1	gene-cdkn1d	1
BP	GO:0010941	regulation of cell death	3/23	282/11595	0.0175878326323166	0.0941421171072137	gene-snai2/gene-trim69/gene-phlda1	3	phlda1/snai2/trim69	1	gene-trim69	2
BP	GO:0022612	gland morphogenesis	1/23	10/11595	0.0196675732118134	0.0941421171072137	gene-snai2	1	snai2	0	-	1
BP	GO:0035601	protein deacylation	1/23	10/11595	0.0196675732118134	0.0941421171072137	gene-znf703	1	znf703	0	-	1
BP	GO:0050921	positive regulation of chemotaxis	1/23	10/11595	0.0196675732118134	0.0941421171072137	gene-snai2	1	snai2	0	-	1
BP	GO:0070849	response to epidermal growth factor	1/23	10/11595	0.0196675732118134	0.0941421171072137	gene-snai2	1	snai2	0	-	1
BP	GO:0071364	cellular response to epidermal growth factor stimulus	1/23	10/11595	0.0196675732118134	0.0941421171072137	gene-snai2	1	snai2	0	-	1
BP	GO:0098732	macromolecule deacylation	1/23	10/11595	0.0196675732118134	0.0941421171072137	gene-znf703	1	znf703	0	-	1
BP	GO:1901985	positive regulation of protein acetylation	1/23	10/11595	0.0196675732118134	0.0941421171072137	gene-snai2	1	snai2	0	-	1
BP	GO:2000758	positive regulation of peptidyl-lysine acetylation	1/23	10/11595	0.0196675732118134	0.0941421171072137	gene-snai2	1	snai2	0	-	1
BP	GO:2001243	negative regulation of intrinsic apoptotic signaling pathway	1/23	10/11595	0.0196675732118134	0.0941421171072137	gene-snai2	1	snai2	0	-	1
BP	GO:0002062	chondrocyte differentiation	1/23	11/11595	0.0216138525226576	0.0946569369448477	gene-snai2	1	snai2	0	-	1
BP	GO:0007584	response to nutrient	1/23	11/11595	0.0216138525226576	0.0946569369448477	gene-snai2	1	snai2	0	-	1
BP	GO:0032104	regulation of response to extracellular stimulus	1/23	11/11595	0.0216138525226576	0.0946569369448477	gene-snai2	1	snai2	0	-	1
BP	GO:0032107	regulation of response to nutrient levels	1/23	11/11595	0.0216138525226576	0.0946569369448477	gene-snai2	1	snai2	0	-	1
BP	GO:0032602	chemokine production	1/23	11/11595	0.0216138525226576	0.0946569369448477	gene-snai2	1	snai2	0	-	1
BP	GO:0032642	regulation of chemokine production	1/23	11/11595	0.0216138525226576	0.0946569369448477	gene-snai2	1	snai2	0	-	1
BP	GO:0051172	negative regulation of nitrogen compound metabolic process	3/23	305/11595	0.0216208045389346	0.0946569369448477	gene-znf703/gene-snai2/gene-id2a	3	id2a/snai2/znf703	0	-	3
BP	GO:0031401	positive regulation of protein modification process	2/23	119/11595	0.0229595997593563	0.098334422676211	gene-znf703/gene-snai2	2	snai2/znf703	0	-	2
BP	GO:0001763	morphogenesis of a branching structure	1/23	12/11595	0.0235564355157497	0.098334422676211	gene-snai2	1	snai2	0	-	1
BP	GO:1901796	regulation of signal transduction by p53 class mediator	1/23	12/11595	0.0235564355157497	0.098334422676211	gene-snai2	1	snai2	0	-	1
BP	GO:2001021	negative regulation of response to DNA damage stimulus	1/23	12/11595	0.0235564355157497	0.098334422676211	gene-snai2	1	snai2	0	-	1
BP	GO:0001649	osteoblast differentiation	1/23	13/11595	0.0254953288925206	0.101698034137943	gene-snai2	1	snai2	0	-	1
BP	GO:0007043	cell-cell junction assembly	1/23	13/11595	0.0254953288925206	0.101698034137943	gene-snai2	1	snai2	0	-	1
BP	GO:0060840	artery development	1/23	13/11595	0.0254953288925206	0.101698034137943	gene-pthlha	1	pthlha	0	-	1
BP	GO:0072089	stem cell proliferation	1/23	13/11595	0.0254953288925206	0.101698034137943	gene-snai2	1	snai2	0	-	1
BP	GO:0008630	intrinsic apoptotic signaling pathway in response to DNA damage	1/23	14/11595	0.027430539342829	0.104761315149741	gene-snai2	1	snai2	0	-	1
BP	GO:0045600	positive regulation of fat cell differentiation	1/23	14/11595	0.027430539342829	0.104761315149741	gene-snai2	1	snai2	0	-	1
BP	GO:0046890	regulation of lipid biosynthetic process	1/23	14/11595	0.027430539342829	0.104761315149741	gene-snai2	1	snai2	0	-	1
BP	GO:0061035	regulation of cartilage development	1/23	14/11595	0.027430539342829	0.104761315149741	gene-snai2	1	snai2	0	-	1
BP	GO:0010594	regulation of endothelial cell migration	1/23	15/11595	0.0293620735449804	0.110957730554189	gene-snai2	1	snai2	0	-	1
BP	GO:0031324	negative regulation of cellular metabolic process	3/23	349/11595	0.0306511903262777	0.112330878015029	gene-znf703/gene-snai2/gene-id2a	3	id2a/snai2/znf703	0	-	3
BP	GO:0010632	regulation of epithelial cell migration	1/23	16/11595	0.0312899381657463	0.112330878015029	gene-snai2	1	snai2	0	-	1
BP	GO:0048596	embryonic camera-type eye morphogenesis	1/23	16/11595	0.0312899381657463	0.112330878015029	gene-znf703	1	znf703	0	-	1
BP	GO:0050920	regulation of chemotaxis	1/23	16/11595	0.0312899381657463	0.112330878015029	gene-snai2	1	snai2	0	-	1
BP	GO:2000027	regulation of animal organ morphogenesis	1/23	16/11595	0.0312899381657463	0.112330878015029	gene-snai2	1	snai2	0	-	1
BP	GO:0006766	vitamin metabolic process	1/23	17/11595	0.033214139860382	0.113560725808354	gene-snai2	1	snai2	0	-	1
BP	GO:0048048	embryonic eye morphogenesis	1/23	17/11595	0.033214139860382	0.113560725808354	gene-znf703	1	znf703	0	-	1
BP	GO:1901983	regulation of protein acetylation	1/23	17/11595	0.033214139860382	0.113560725808354	gene-snai2	1	snai2	0	-	1
BP	GO:2000756	regulation of peptidyl-lysine acetylation	1/23	17/11595	0.033214139860382	0.113560725808354	gene-snai2	1	snai2	0	-	1
BP	GO:2001242	regulation of intrinsic apoptotic signaling pathway	1/23	17/11595	0.033214139860382	0.113560725808354	gene-snai2	1	snai2	0	-	1
BP	GO:0019229	regulation of vasoconstriction	1/23	18/11595	0.0351346852726473	0.115986913150481	gene-edn1	1	edn1	0	-	1
BP	GO:0062014	negative regulation of small molecule metabolic process	1/23	18/11595	0.0351346852726473	0.115986913150481	gene-snai2	1	snai2	0	-	1
BP	GO:2001234	negative regulation of apoptotic signaling pathway	1/23	18/11595	0.0351346852726473	0.115986913150481	gene-snai2	1	snai2	0	-	1
BP	GO:0051130	positive regulation of cellular component organization	2/23	150/11595	0.035216082265745	0.115986913150481	gene-znf703/gene-snai2	2	snai2/znf703	0	-	2
BP	GO:0010212	response to ionizing radiation	1/23	19/11595	0.037051581034825	0.117712545057541	gene-snai2	1	snai2	0	-	1
BP	GO:0030282	bone mineralization	1/23	19/11595	0.037051581034825	0.117712545057541	gene-pthlha	1	pthlha	0	-	1
BP	GO:0045598	regulation of fat cell differentiation	1/23	19/11595	0.037051581034825	0.117712545057541	gene-snai2	1	snai2	0	-	1
BP	GO:0071478	cellular response to radiation	1/23	19/11595	0.037051581034825	0.117712545057541	gene-snai2	1	snai2	0	-	1
BP	GO:0006879	cellular iron ion homeostasis	1/23	20/11595	0.0389648337677378	0.119558763441179	gene-LOC122881039	1	LOC122881039	0	-	1
BP	GO:0031076	embryonic camera-type eye development	1/23	20/11595	0.0389648337677378	0.119558763441179	gene-znf703	1	znf703	0	-	1
BP	GO:0031101	fin regeneration	1/23	20/11595	0.0389648337677378	0.119558763441179	gene-ccn1	1	ccn1	0	-	1
BP	GO:0090090	negative regulation of canonical Wnt signaling pathway	1/23	20/11595	0.0389648337677378	0.119558763441179	gene-snai2	1	snai2	0	-	1
BP	GO:0032270	positive regulation of cellular protein metabolic process	2/23	160/11595	0.0396101601950799	0.120508877203675	gene-znf703/gene-snai2	2	snai2/znf703	0	-	2
BP	GO:0035272	exocrine system development	1/23	21/11595	0.0408744500807693	0.122865413834446	gene-snai2	1	snai2	0	-	1
BP	GO:0007420	brain development	2/23	165/11595	0.0418824623525975	0.122865413834446	gene-znf703/gene-trim69	2	trim69/znf703	1	gene-trim69	1
BP	GO:0051247	positive regulation of protein metabolic process	2/23	165/11595	0.0418824623525975	0.122865413834446	gene-znf703/gene-snai2	2	snai2/znf703	0	-	2
BP	GO:0008593	regulation of Notch signaling pathway	1/23	22/11595	0.0427804365718825	0.122865413834446	gene-id2a	1	id2a	0	-	1
BP	GO:0016573	histone acetylation	1/23	22/11595	0.0427804365718825	0.122865413834446	gene-snai2	1	snai2	0	-	1
BP	GO:0090504	epiboly	1/23	22/11595	0.0427804365718825	0.122865413834446	gene-snai2	1	snai2	0	-	1
BP	GO:1901888	regulation of cell junction assembly	1/23	22/11595	0.0427804365718825	0.122865413834446	gene-snai2	1	snai2	0	-	1
BP	GO:0006915	apoptotic process	3/23	405/11595	0.0446347146223426	0.123393270293244	gene-snai2/gene-trim69/gene-phlda1	3	phlda1/snai2/trim69	1	gene-trim69	2
BP	GO:0006475	internal protein amino acid acetylation	1/23	23/11595	0.044682799827637	0.123393270293244	gene-snai2	1	snai2	0	-	1
BP	GO:0007050	cell cycle arrest	1/23	23/11595	0.044682799827637	0.123393270293244	gene-cdkn1d	1	cdkn1d	1	gene-cdkn1d	0
BP	GO:0007093	mitotic cell cycle checkpoint	1/23	23/11595	0.044682799827637	0.123393270293244	gene-id2a	1	id2a	0	-	1
BP	GO:0018393	internal peptidyl-lysine acetylation	1/23	23/11595	0.044682799827637	0.123393270293244	gene-snai2	1	snai2	0	-	1
BP	GO:0031214	biomineral tissue development	1/23	24/11595	0.0465815464232096	0.123872408636535	gene-pthlha	1	pthlha	0	-	1
BP	GO:0060326	cell chemotaxis	1/23	24/11595	0.0465815464232096	0.123872408636535	gene-snai2	1	snai2	0	-	1
BP	GO:0071214	cellular response to abiotic stimulus	1/23	24/11595	0.0465815464232096	0.123872408636535	gene-snai2	1	snai2	0	-	1
BP	GO:0104004	cellular response to environmental stimulus	1/23	24/11595	0.0465815464232096	0.123872408636535	gene-snai2	1	snai2	0	-	1
BP	GO:0110148	biomineralization	1/23	24/11595	0.0465815464232096	0.123872408636535	gene-pthlha	1	pthlha	0	-	1
BP	GO:0012501	programmed cell death	3/23	416/11595	0.047704090420085	0.125202368123351	gene-snai2/gene-trim69/gene-phlda1	3	phlda1/snai2/trim69	1	gene-trim69	2
BP	GO:0060322	head development	2/23	178/11595	0.0480156216775793	0.125202368123351	gene-znf703/gene-trim69	2	trim69/znf703	1	gene-trim69	1
BP	GO:0000077	DNA damage checkpoint	1/23	25/11595	0.0484766829224117	0.125202368123351	gene-id2a	1	id2a	0	-	1
BP	GO:0043542	endothelial cell migration	1/23	25/11595	0.0484766829224117	0.125202368123351	gene-snai2	1	snai2	0	-	1
BP	GO:0030522	intracellular receptor signaling pathway	1/23	26/11595	0.0503682158777081	0.128242478724094	gene-snai2	1	snai2	0	-	1
BP	GO:0046916	cellular transition metal ion homeostasis	1/23	26/11595	0.0503682158777081	0.128242478724094	gene-LOC122881039	1	LOC122881039	0	-	1
BP	GO:0016055	Wnt signaling pathway	2/23	184/11595	0.0509520765339447	0.128815461096381	gene-LOC122884881/gene-snai2	2	LOC122884881/snai2	0	-	2
BP	GO:0198738	cell-cell signaling by wnt	2/23	185/11595	0.0514477822711263	0.129159117729611	gene-LOC122884881/gene-snai2	2	LOC122884881/snai2	0	-	2
BP	GO:0031570	DNA integrity checkpoint	1/23	27/11595	0.052256151830238	0.129379024186589	gene-id2a	1	id2a	0	-	1
BP	GO:0045216	cell-cell junction organization	1/23	27/11595	0.052256151830238	0.129379024186589	gene-snai2	1	snai2	0	-	1
BP	GO:0008219	cell death	3/23	437/11595	0.0538516953680875	0.130445896202876	gene-snai2/gene-trim69/gene-phlda1	3	phlda1/snai2/trim69	1	gene-trim69	2
BP	GO:0031669	cellular response to nutrient levels	1/23	28/11595	0.0541404973098286	0.130445896202876	gene-snai2	1	snai2	0	-	1
BP	GO:0042074	cell migration involved in gastrulation	1/23	28/11595	0.0541404973098286	0.130445896202876	gene-snai1a	1	snai1a	0	-	1
BP	GO:0097193	intrinsic apoptotic signaling pathway	1/23	28/11595	0.0541404973098286	0.130445896202876	gene-snai2	1	snai2	0	-	1
BP	GO:0007389	pattern specification process	2/23	192/11595	0.0549670083374852	0.131448574652102	gene-snai1a/gene-znf703	2	snai1a/znf703	0	-	2
BP	GO:0031668	cellular response to extracellular stimulus	1/23	29/11595	0.0560212588350184	0.131448574652102	gene-snai2	1	snai2	0	-	1
BP	GO:0032103	positive regulation of response to external stimulus	1/23	29/11595	0.0560212588350184	0.131448574652102	gene-snai2	1	snai2	0	-	1
BP	GO:0071496	cellular response to external stimulus	1/23	29/11595	0.0560212588350184	0.131448574652102	gene-snai2	1	snai2	0	-	1
BP	GO:1905114	cell surface receptor signaling pathway involved in cell-cell signaling	2/23	195/11595	0.0565011992218051	0.131554056998694	gene-LOC122884881/gene-snai2	2	LOC122884881/snai2	0	-	2
BP	GO:0002011	morphogenesis of an epithelial sheet	1/23	30/11595	0.0578984429130744	0.131554056998694	gene-snai2	1	snai2	0	-	1
BP	GO:0010631	epithelial cell migration	1/23	30/11595	0.0578984429130744	0.131554056998694	gene-snai2	1	snai2	0	-	1
BP	GO:0055072	iron ion homeostasis	1/23	30/11595	0.0578984429130744	0.131554056998694	gene-LOC122881039	1	LOC122881039	0	-	1
BP	GO:2001233	regulation of apoptotic signaling pathway	1/23	30/11595	0.0578984429130744	0.131554056998694	gene-snai2	1	snai2	0	-	1
BP	GO:0000278	mitotic cell cycle	2/23	200/11595	0.0590919729289479	0.133421498625738	gene-id2a/gene-cdkn1d	2	cdkn1d/id2a	1	gene-cdkn1d	1
BP	GO:0018394	peptidyl-lysine acetylation	1/23	31/11595	0.0597720560400089	0.13411355073977	gene-snai2	1	snai2	0	-	1
BP	GO:0045444	fat cell differentiation	1/23	32/11595	0.0616421047006005	0.137450407375873	gene-snai2	1	snai2	0	-	1
BP	GO:0090132	epithelium migration	1/23	33/11595	0.0635085953684104	0.139513892222324	gene-snai2	1	snai2	0	-	1
BP	GO:0043009	chordate embryonic development	2/23	210/11595	0.0643966360918638	0.139513892222324	gene-egr1/gene-pthlha	2	egr1/pthlha	0	-	2
BP	GO:0009792	embryo development ending in birth or egg hatching	2/23	211/11595	0.0649358998517071	0.139513892222324	gene-egr1/gene-pthlha	2	egr1/pthlha	0	-	2
BP	GO:0010605	negative regulation of macromolecule metabolic process	3/23	473/11595	0.065249964953563	0.139513892222324	gene-znf703/gene-snai2/gene-id2a	3	id2a/snai2/znf703	0	-	3
BP	GO:0048703	embryonic viscerocranium morphogenesis	1/23	34/11595	0.0653715345058024	0.139513892222324	gene-egr1	1	egr1	0	-	1
BP	GO:0045595	regulation of cell differentiation	2/23	213/11595	0.0660191248883401	0.139513892222324	gene-snai2/gene-id2a	2	id2a/snai2	0	-	2
BP	GO:0006325	chromatin organization	2/23	214/11595	0.0665630707679599	0.139513892222324	gene-znf703/gene-snai2	2	snai2/znf703	0	-	2
BP	GO:0006473	protein acetylation	1/23	35/11595	0.067230928563961	0.139513892222324	gene-snai2	1	snai2	0	-	1
BP	GO:0030509	BMP signaling pathway	1/23	35/11595	0.067230928563961	0.139513892222324	gene-id2a	1	id2a	0	-	1
BP	GO:0071772	response to BMP	1/23	35/11595	0.067230928563961	0.139513892222324	gene-id2a	1	id2a	0	-	1
BP	GO:0071773	cellular response to BMP stimulus	1/23	35/11595	0.067230928563961	0.139513892222324	gene-id2a	1	id2a	0	-	1
BP	GO:0090130	tissue migration	1/23	35/11595	0.067230928563961	0.139513892222324	gene-snai2	1	snai2	0	-	1
BP	GO:0042246	tissue regeneration	1/23	36/11595	0.0690867839829077	0.141726602570651	gene-ccn1	1	ccn1	0	-	1
BP	GO:0062012	regulation of small molecule metabolic process	1/23	36/11595	0.0690867839829077	0.141726602570651	gene-snai2	1	snai2	0	-	1
BP	GO:0042310	vasoconstriction	1/23	37/11595	0.0709391071915241	0.14388214396473	gene-edn1	1	edn1	0	-	1
BP	GO:0046530	photoreceptor cell differentiation	1/23	37/11595	0.0709391071915241	0.14388214396473	gene-id2a	1	id2a	0	-	1
BP	GO:0007417	central nervous system development	2/23	224/11595	0.0720862695740301	0.144369379856992	gene-znf703/gene-trim69	2	trim69/znf703	1	gene-trim69	1
BP	GO:0019216	regulation of lipid metabolic process	1/23	38/11595	0.0727879046075642	0.144369379856992	gene-snai2	1	snai2	0	-	1
BP	GO:0045664	regulation of neuron differentiation	1/23	38/11595	0.0727879046075642	0.144369379856992	gene-id2a	1	id2a	0	-	1
BP	GO:0071396	cellular response to lipid	1/23	38/11595	0.0727879046075642	0.144369379856992	gene-snai2	1	snai2	0	-	1
BP	GO:0007162	negative regulation of cell adhesion	1/23	39/11595	0.0746331826376779	0.14482871657798	gene-snai2	1	snai2	0	-	1
BP	GO:0018298	protein-chromophore linkage	1/23	39/11595	0.0746331826376779	0.14482871657798	gene-LOC122882605	1	LOC122882605	1	gene-LOC122882605	0
BP	GO:0055076	transition metal ion homeostasis	1/23	39/11595	0.0746331826376779	0.14482871657798	gene-LOC122881039	1	LOC122881039	0	-	1
BP	GO:0060042	retina morphogenesis in camera-type eye	1/23	39/11595	0.0746331826376779	0.14482871657798	gene-egr1	1	egr1	0	-	1
BP	GO:0006694	steroid biosynthetic process	1/23	40/11595	0.0764749476774268	0.146815541263081	gene-snai2	1	snai2	0	-	1
BP	GO:2001020	regulation of response to DNA damage stimulus	1/23	40/11595	0.0764749476774268	0.146815541263081	gene-snai2	1	snai2	0	-	1
BP	GO:0042127	regulation of cell population proliferation	2/23	233/11595	0.0771830495165623	0.147386780725776	gene-snai2/gene-id2a	2	id2a/snai2	0	-	2
BP	GO:0030902	hindbrain development	1/23	41/11595	0.0783132061113008	0.147970742073458	gene-znf703	1	znf703	0	-	1
BP	GO:0043473	pigmentation	1/23	41/11595	0.0783132061113008	0.147970742073458	gene-snai2	1	snai2	0	-	1
BP	GO:0014031	mesenchymal cell development	1/23	43/11595	0.0819792286441536	0.151703830326037	gene-snai2	1	snai2	0	-	1
BP	GO:0014032	neural crest cell development	1/23	43/11595	0.0819792286441536	0.151703830326037	gene-snai2	1	snai2	0	-	1
BP	GO:0048864	stem cell development	1/23	43/11595	0.0819792286441536	0.151703830326037	gene-snai2	1	snai2	0	-	1
BP	GO:0071407	cellular response to organic cyclic compound	1/23	43/11595	0.0819792286441536	0.151703830326037	gene-snai2	1	snai2	0	-	1
BP	GO:0000075	cell cycle checkpoint	1/23	44/11595	0.0838070054569289	0.153503647750191	gene-id2a	1	id2a	0	-	1
BP	GO:0043543	protein acylation	1/23	44/11595	0.0838070054569289	0.153503647750191	gene-snai2	1	snai2	0	-	1
BP	GO:0034329	cell junction assembly	1/23	46/11595	0.0874521218771674	0.158562180575268	gene-snai2	1	snai2	0	-	1
BP	GO:0060828	regulation of canonical Wnt signaling pathway	1/23	46/11595	0.0874521218771674	0.158562180575268	gene-snai2	1	snai2	0	-	1
BP	GO:0031399	regulation of protein modification process	2/23	253/11595	0.0889087747668335	0.15865218422558	gene-znf703/gene-snai2	2	snai2/znf703	0	-	2
BP	GO:0014033	neural crest cell differentiation	1/23	47/11595	0.0892694741324993	0.15865218422558	gene-snai2	1	snai2	0	-	1
BP	GO:0031667	response to nutrient levels	1/23	47/11595	0.0892694741324993	0.15865218422558	gene-snai2	1	snai2	0	-	1
BP	GO:0042742	defense response to bacterium	1/23	47/11595	0.0892694741324993	0.15865218422558	gene-LOC122881039	1	LOC122881039	0	-	1
BP	GO:0009991	response to extracellular stimulus	1/23	48/11595	0.0910833641649681	0.158732658908852	gene-snai2	1	snai2	0	-	1
BP	GO:0035150	regulation of tube size	1/23	48/11595	0.0910833641649681	0.158732658908852	gene-edn1	1	edn1	0	-	1
BP	GO:0035296	regulation of tube diameter	1/23	48/11595	0.0910833641649681	0.158732658908852	gene-edn1	1	edn1	0	-	1
BP	GO:0097746	blood vessel diameter maintenance	1/23	48/11595	0.0910833641649681	0.158732658908852	gene-edn1	1	edn1	0	-	1
BP	GO:0045930	negative regulation of mitotic cell cycle	1/23	49/11595	0.0928937982711607	0.161105669465443	gene-id2a	1	id2a	0	-	1
BP	GO:0016477	cell migration	2/23	261/11595	0.0937436394537246	0.161797916172534	gene-snai1a/gene-snai2	2	snai1a/snai2	0	-	2
BP	GO:0003018	vascular process in circulatory system	1/23	50/11595	0.0947007827367561	0.161893242869026	gene-edn1	1	edn1	0	-	1
BP	GO:0009953	dorsal/ventral pattern formation	1/23	50/11595	0.0947007827367561	0.161893242869026	gene-snai1a	1	snai1a	0	-	1
BP	GO:0001889	liver development	1/23	51/11595	0.0965043238365446	0.164145532988677	gene-id2a	1	id2a	0	-	1
BP	GO:0007605	sensory perception of sound	1/23	52/11595	0.0983044278344446	0.164145532988677	gene-snai2	1	snai2	0	-	1
BP	GO:0030335	positive regulation of cell migration	1/23	52/11595	0.0983044278344446	0.164145532988677	gene-snai2	1	snai2	0	-	1
BP	GO:0061008	hepaticobiliary system development	1/23	52/11595	0.0983044278344446	0.164145532988677	gene-id2a	1	id2a	0	-	1
BP	GO:0097190	apoptotic signaling pathway	1/23	52/11595	0.0983044278344446	0.164145532988677	gene-snai2	1	snai2	0	-	1
BP	GO:1903522	regulation of blood circulation	1/23	53/11595	0.100101100983523	0.165605047249238	gene-edn1	1	edn1	0	-	1
BP	GO:2000147	positive regulation of cell motility	1/23	53/11595	0.100101100983523	0.165605047249238	gene-snai2	1	snai2	0	-	1
BP	GO:0006875	cellular metal ion homeostasis	1/23	54/11595	0.101894349526009	0.167032289862271	gene-LOC122881039	1	LOC122881039	0	-	1
BP	GO:0050954	sensory perception of mechanical stimulus	1/23	54/11595	0.101894349526009	0.167032289862271	gene-snai2	1	snai2	0	-	1
BP	GO:0051272	positive regulation of cellular component movement	1/23	55/11595	0.103684179693317	0.169193729590458	gene-snai2	1	snai2	0	-	1
BP	GO:0033043	regulation of organelle organization	2/23	278/11595	0.104270438413196	0.169380485929129	gene-znf703/gene-snai2	2	snai2/znf703	0	-	2
BP	GO:0060070	canonical Wnt signaling pathway	1/23	56/11595	0.10547059770606	0.170558308903043	gene-snai2	1	snai2	0	-	1
BP	GO:0031099	regeneration	1/23	57/11595	0.107253609774069	0.171893062093263	gene-ccn1	1	ccn1	0	-	1
BP	GO:0040017	positive regulation of locomotion	1/23	57/11595	0.107253609774069	0.171893062093263	gene-snai2	1	snai2	0	-	1
BP	GO:0003007	heart morphogenesis	1/23	58/11595	0.109033222096413	0.172435800584195	gene-snai2	1	snai2	0	-	1
BP	GO:0006873	cellular ion homeostasis	1/23	58/11595	0.109033222096413	0.172435800584195	gene-LOC122881039	1	LOC122881039	0	-	1
BP	GO:0030003	cellular cation homeostasis	1/23	58/11595	0.109033222096413	0.172435800584195	gene-LOC122881039	1	LOC122881039	0	-	1
BP	GO:0050680	negative regulation of epithelial cell proliferation	1/23	59/11595	0.110809440861411	0.174476268724765	gene-snai2	1	snai2	0	-	1
BP	GO:0008283	cell population proliferation	2/23	293/11595	0.113823465012073	0.178439405848621	gene-snai2/gene-id2a	2	id2a/snai2	0	-	2
BP	GO:0043065	positive regulation of apoptotic process	1/23	62/11595	0.116117797534719	0.180460126904606	gene-phlda1	1	phlda1	0	-	1
BP	GO:0043068	positive regulation of programmed cell death	1/23	62/11595	0.116117797534719	0.180460126904606	gene-phlda1	1	phlda1	0	-	1
BP	GO:0022402	cell cycle process	2/23	301/11595	0.119012198736409	0.184161117872289	gene-id2a/gene-cdkn1d	2	cdkn1d/id2a	1	gene-cdkn1d	1
BP	GO:1901617	organic hydroxy compound biosynthetic process	1/23	64/11595	0.119639847167435	0.184337790270855	gene-snai2	1	snai2	0	-	1
BP	GO:0048870	cell motility	2/23	304/11595	0.120973928183588	0.184806979650672	gene-snai1a/gene-snai2	2	snai1a/snai2	0	-	2
BP	GO:0051674	localization of cell	2/23	304/11595	0.120973928183588	0.184806979650672	gene-snai1a/gene-snai2	2	snai1a/snai2	0	-	2
BP	GO:0010942	positive regulation of cell death	1/23	66/11595	0.123148470181111	0.187229391121863	gene-phlda1	1	phlda1	0	-	1
BP	GO:0006974	cellular response to DNA damage stimulus	2/23	308/11595	0.123602689960673	0.187229391121863	gene-snai2/gene-id2a	2	id2a/snai2	0	-	2
BP	GO:0009968	negative regulation of signal transduction	2/23	311/11595	0.125583898742703	0.189431174994245	gene-LOC122884881/gene-snai2	2	LOC122884881/snai2	0	-	2
BP	GO:0010648	negative regulation of cell communication	2/23	313/11595	0.126909207035057	0.189673641373033	gene-LOC122884881/gene-snai2	2	LOC122884881/snai2	0	-	2
BP	GO:0023057	negative regulation of signaling	2/23	313/11595	0.126909207035057	0.189673641373033	gene-LOC122884881/gene-snai2	2	LOC122884881/snai2	0	-	2
BP	GO:0045596	negative regulation of cell differentiation	1/23	69/11595	0.128386336639685	0.189673641373033	gene-snai2	1	snai2	0	-	1
BP	GO:0048863	stem cell differentiation	1/23	69/11595	0.128386336639685	0.189673641373033	gene-snai2	1	snai2	0	-	1
BP	GO:0051216	cartilage development	1/23	69/11595	0.128386336639685	0.189673641373033	gene-snai2	1	snai2	0	-	1
BP	GO:0055065	metal ion homeostasis	1/23	70/11595	0.130125631647259	0.191455335087565	gene-LOC122881039	1	LOC122881039	0	-	1
BP	GO:0050678	regulation of epithelial cell proliferation	1/23	72/11595	0.133594267324727	0.195756497835008	gene-snai2	1	snai2	0	-	1
BP	GO:0008202	steroid metabolic process	1/23	77/11595	0.142208071158022	0.205857651394072	gene-snai2	1	snai2	0	-	1
BP	GO:0014070	response to organic cyclic compound	1/23	77/11595	0.142208071158022	0.205857651394072	gene-snai2	1	snai2	0	-	1
BP	GO:0042060	wound healing	1/23	77/11595	0.142208071158022	0.205857651394072	gene-snai2	1	snai2	0	-	1
BP	GO:0051276	chromosome organization	2/23	340/11595	0.145129887202819	0.209243491991213	gene-znf703/gene-snai2	2	snai2/znf703	0	-	2
BP	GO:0018205	peptidyl-lysine modification	1/23	80/11595	0.147336969440198	0.211575888116124	gene-snai2	1	snai2	0	-	1
BP	GO:0007267	cell-cell signaling	2/23	345/11595	0.148566354516174	0.212491319806002	gene-LOC122884881/gene-snai2	2	LOC122884881/snai2	0	-	2
BP	GO:0030155	regulation of cell adhesion	1/23	84/11595	0.154129886744079	0.218706044826578	gene-snai2	1	snai2	0	-	1
BP	GO:0055082	cellular chemical homeostasis	1/23	84/11595	0.154129886744079	0.218706044826578	gene-LOC122881039	1	LOC122881039	0	-	1
BP	GO:0050673	epithelial cell proliferation	1/23	85/11595	0.155820010330638	0.220233794128737	gene-snai2	1	snai2	0	-	1
BP	GO:0007369	gastrulation	1/23	87/11595	0.159190571985866	0.224115354285983	gene-snai1a	1	snai1a	0	-	1
BP	GO:0044057	regulation of system process	1/23	89/11595	0.162548258862751	0.225308204369604	gene-edn1	1	edn1	0	-	1
BP	GO:0055080	cation homeostasis	1/23	89/11595	0.162548258862751	0.225308204369604	gene-LOC122881039	1	LOC122881039	0	-	1
BP	GO:0061448	connective tissue development	1/23	89/11595	0.162548258862751	0.225308204369604	gene-snai2	1	snai2	0	-	1
BP	GO:0098771	inorganic ion homeostasis	1/23	89/11595	0.162548258862751	0.225308204369604	gene-LOC122881039	1	LOC122881039	0	-	1
BP	GO:0048585	negative regulation of response to stimulus	2/23	369/11595	0.165298236582064	0.228238718972927	gene-LOC122884881/gene-snai2	2	LOC122884881/snai2	0	-	2
BP	GO:0080135	regulation of cellular response to stress	1/23	92/11595	0.167560751630436	0.230476282893972	gene-snai2	1	snai2	0	-	1
BP	GO:0050801	ion homeostasis	1/23	93/11595	0.169225195924317	0.23142152655692	gene-LOC122881039	1	LOC122881039	0	-	1
BP	GO:0072359	circulatory system development	2/23	375/11595	0.169537218619694	0.23142152655692	gene-snai2/gene-pthlha	2	pthlha/snai2	0	-	2
BP	GO:0045597	positive regulation of cell differentiation	1/23	94/11595	0.170886456617565	0.232379689112522	gene-snai2	1	snai2	0	-	1
BP	GO:0007368	determination of left/right symmetry	1/23	95/11595	0.172544539523207	0.233749017693703	gene-znf703	1	znf703	0	-	1
BP	GO:0022411	cellular component disassembly	1/23	96/11595	0.174199450444161	0.235103769584412	gene-snai2	1	snai2	0	-	1
BP	GO:0000122	negative regulation of transcription by RNA polymerase II	1/23	98/11595	0.177499779493219	0.23854093156128	gene-snai2	1	snai2	0	-	1
BP	GO:0032268	regulation of cellular protein metabolic process	2/23	387/11595	0.178075124396722	0.23854093156128	gene-znf703/gene-snai2	2	snai2/znf703	0	-	2
BP	GO:0009314	response to radiation	1/23	101/11595	0.1824266276751	0.242559849390225	gene-snai2	1	snai2	0	-	1
BP	GO:0009611	response to wounding	1/23	101/11595	0.1824266276751	0.242559849390225	gene-snai2	1	snai2	0	-	1
BP	GO:0019725	cellular homeostasis	1/23	103/11595	0.185695496649215	0.244544585240033	gene-LOC122881039	1	LOC122881039	0	-	1
BP	GO:0043066	negative regulation of apoptotic process	1/23	103/11595	0.185695496649215	0.244544585240033	gene-snai2	1	snai2	0	-	1
BP	GO:0009799	specification of symmetry	1/23	104/11595	0.187325239389998	0.244544585240033	gene-znf703	1	znf703	0	-	1
BP	GO:0009855	determination of bilateral symmetry	1/23	104/11595	0.187325239389998	0.244544585240033	gene-znf703	1	znf703	0	-	1
BP	GO:0043069	negative regulation of programmed cell death	1/23	104/11595	0.187325239389998	0.244544585240033	gene-snai2	1	snai2	0	-	1
BP	GO:0051246	regulation of protein metabolic process	2/23	403/11595	0.189571661675335	0.246580530947266	gene-znf703/gene-snai2	2	snai2/znf703	0	-	2
BP	GO:0040011	locomotion	2/23	410/11595	0.194637710351304	0.251413968628694	gene-snai1a/gene-snai2	2	snai1a/snai2	0	-	2
BP	GO:0051173	positive regulation of nitrogen compound metabolic process	2/23	411/11595	0.195363097832037	0.251413968628694	gene-znf703/gene-snai2	2	snai2/znf703	0	-	2
BP	GO:1901701	cellular response to oxygen-containing compound	1/23	109/11595	0.195427263840411	0.251413968628694	gene-snai2	1	snai2	0	-	1
BP	GO:0050793	regulation of developmental process	2/23	412/11595	0.196088889181154	0.251413968628694	gene-snai2/gene-id2a	2	id2a/snai2	0	-	2
BP	GO:0034330	cell junction organization	1/23	113/11595	0.20185319682647	0.257180512146995	gene-snai2	1	snai2	0	-	1
BP	GO:0003008	system process	2/23	421/11595	0.202638497497143	0.257180512146995	gene-snai2/gene-edn1	2	edn1/snai2	0	-	2
BP	GO:0003002	regionalization	1/23	114/11595	0.20345199289623	0.257180512146995	gene-snai1a	1	snai1a	0	-	1
BP	GO:0033993	response to lipid	1/23	114/11595	0.20345199289623	0.257180512146995	gene-snai2	1	snai2	0	-	1
BP	GO:0008015	blood circulation	1/23	115/11595	0.20504772533795	0.257385081805329	gene-edn1	1	edn1	0	-	1
BP	GO:0060548	negative regulation of cell death	1/23	115/11595	0.20504772533795	0.257385081805329	gene-snai2	1	snai2	0	-	1
BP	GO:0003013	circulatory system process	1/23	117/11595	0.208230021744294	0.260468912216731	gene-edn1	1	edn1	0	-	1
BP	GO:0030334	regulation of cell migration	1/23	118/11595	0.209816596888037	0.261542216259741	gene-snai2	1	snai2	0	-	1
BP	GO:0051093	negative regulation of developmental process	1/23	119/11595	0.211400130762009	0.262604314683603	gene-snai2	1	snai2	0	-	1
BP	GO:0031325	positive regulation of cellular metabolic process	2/23	436/11595	0.213618333565271	0.264444764654939	gene-znf703/gene-snai2	2	snai2/znf703	0	-	2
BP	GO:2000145	regulation of cell motility	1/23	124/11595	0.21927237552946	0.269868375063261	gene-snai2	1	snai2	0	-	1
BP	GO:0051239	regulation of multicellular organismal process	2/23	444/11595	0.219502968018028	0.269868375063261	gene-snai2/gene-edn1	2	edn1/snai2	0	-	2
BP	GO:0008285	negative regulation of cell population proliferation	1/23	125/11595	0.220837778315862	0.270582806878479	gene-snai2	1	snai2	0	-	1
BP	GO:0048589	developmental growth	1/23	127/11595	0.223959581837615	0.273474455373142	gene-ccn1	1	ccn1	0	-	1
BP	GO:0001816	cytokine production	1/23	128/11595	0.225515993558729	0.273514330025621	gene-snai2	1	snai2	0	-	1
BP	GO:0001817	regulation of cytokine production	1/23	128/11595	0.225515993558729	0.273514330025621	gene-snai2	1	snai2	0	-	1
BP	GO:0033554	cellular response to stress	2/23	458/11595	0.229841893446101	0.276354759215034	gene-snai2/gene-id2a	2	id2a/snai2	0	-	2
BP	GO:0009617	response to bacterium	1/23	131/11595	0.230167334276589	0.276354759215034	gene-LOC122881039	1	LOC122881039	0	-	1
BP	GO:1901615	organic hydroxy compound metabolic process	1/23	131/11595	0.230167334276589	0.276354759215034	gene-snai2	1	snai2	0	-	1
BP	GO:0051270	regulation of cellular component movement	1/23	132/11595	0.231711834565461	0.276360626607975	gene-snai2	1	snai2	0	-	1
BP	GO:1902532	negative regulation of intracellular signal transduction	1/23	132/11595	0.231711834565461	0.276360626607975	gene-snai2	1	snai2	0	-	1
BP	GO:0006935	chemotaxis	1/23	134/11595	0.234791947874191	0.279106984393492	gene-snai2	1	snai2	0	-	1
BP	GO:0010604	positive regulation of macromolecule metabolic process	2/23	468/11595	0.237253938680355	0.281102851439761	gene-znf703/gene-snai2	2	snai2/znf703	0	-	2
BP	GO:0040012	regulation of locomotion	1/23	138/11595	0.240916777149226	0.283570895070728	gene-snai2	1	snai2	0	-	1
BP	GO:0042330	taxis	1/23	138/11595	0.240916777149226	0.283570895070728	gene-snai2	1	snai2	0	-	1
BP	GO:0051094	positive regulation of developmental process	1/23	139/11595	0.242440641522584	0.284431994466039	gene-snai2	1	snai2	0	-	1
BP	GO:0018193	peptidyl-amino acid modification	1/23	142/11595	0.246994697599692	0.288830933023744	gene-snai2	1	snai2	0	-	1
BP	GO:0006357	regulation of transcription by RNA polymerase II	2/23	488/11595	0.252130295524669	0.293879143160247	gene-snai2/gene-fosab	2	fosab/snai2	0	-	2
BP	GO:0048878	chemical homeostasis	1/23	146/11595	0.253026052280028	0.293968779186181	gene-LOC122881039	1	LOC122881039	0	-	1
BP	GO:0009893	positive regulation of metabolic process	2/23	497/11595	0.258841688415094	0.298987184198574	gene-znf703/gene-snai2	2	snai2/znf703	0	-	2
BP	GO:0022603	regulation of anatomical structure morphogenesis	1/23	150/11595	0.259011181854475	0.298987184198574	gene-snai2	1	snai2	0	-	1
BP	GO:0032101	regulation of response to external stimulus	1/23	155/11595	0.266428104906053	0.306563107888696	gene-snai2	1	snai2	0	-	1
BP	GO:1903047	mitotic cell cycle process	1/23	159/11595	0.272310461272838	0.312330529063734	gene-id2a	1	id2a	0	-	1
BP	GO:0002009	morphogenesis of an epithelium	1/23	160/11595	0.273773985178987	0.313009110443492	gene-snai2	1	snai2	0	-	1
BP	GO:0060271	cilium assembly	1/23	164/11595	0.279599975475403	0.318655210144983	gene-znf703	1	znf703	0	-	1
BP	GO:0051241	negative regulation of multicellular organismal process	1/23	172/11595	0.291118120046253	0.330732294609509	gene-snai2	1	snai2	0	-	1
BP	GO:0007507	heart development	1/23	174/11595	0.29397001207772	0.332918720302529	gene-snai2	1	snai2	0	-	1
BP	GO:0040007	growth	1/23	176/11595	0.296810927628417	0.33507900320315	gene-ccn1	1	ccn1	0	-	1
BP	GO:0044782	cilium organization	1/23	179/11595	0.301051808243906	0.338801251283894	gene-znf703	1	znf703	0	-	1
BP	GO:0090066	regulation of anatomical structure size	1/23	180/11595	0.302459990480275	0.339322301820059	gene-edn1	1	edn1	0	-	1
BP	GO:0009628	response to abiotic stimulus	1/23	183/11595	0.306668273311912	0.342971682613634	gene-snai2	1	snai2	0	-	1
BP	GO:0120031	plasma membrane bounded cell projection assembly	1/23	187/11595	0.312241553885407	0.346438494622867	gene-znf703	1	znf703	0	-	1
BP	GO:2000026	regulation of multicellular organismal development	1/23	187/11595	0.312241553885407	0.346438494622867	gene-snai2	1	snai2	0	-	1
BP	GO:0007600	sensory perception	1/23	188/11595	0.313628163655799	0.346438494622867	gene-snai2	1	snai2	0	-	1
BP	GO:0048729	tissue morphogenesis	1/23	188/11595	0.313628163655799	0.346438494622867	gene-snai2	1	snai2	0	-	1
BP	GO:0030031	cell projection assembly	1/23	193/11595	0.320521196779865	0.352966593999912	gene-znf703	1	znf703	0	-	1
BP	GO:0008610	lipid biosynthetic process	1/23	200/11595	0.330060289746505	0.362359767642188	gene-snai2	1	snai2	0	-	1
BP	GO:1901700	response to oxygen-containing compound	1/23	204/11595	0.335453546712605	0.367157997773857	gene-snai2	1	snai2	0	-	1
BP	GO:0001568	blood vessel development	1/23	209/11595	0.342136731831159	0.373334610113636	gene-pthlha	1	pthlha	0	-	1
BP	GO:0043547	positive regulation of GTPase activity	1/23	210/11595	0.343465631810774	0.373648975212326	gene-arhgap24	1	arhgap24	0	-	1
BP	GO:0080134	regulation of response to stress	1/23	214/11595	0.348755599831292	0.37825758410705	gene-snai2	1	snai2	0	-	1
BP	GO:0098542	defense response to other organism	1/23	219/11595	0.355310741806878	0.38420649490563	gene-LOC122881039	1	LOC122881039	0	-	1
BP	GO:0043087	regulation of GTPase activity	1/23	227/11595	0.36566787936497	0.394218524600674	gene-arhgap24	1	arhgap24	0	-	1
BP	GO:0051345	positive regulation of hydrolase activity	1/23	229/11595	0.368232186223411	0.395794475611391	gene-arhgap24	1	arhgap24	0	-	1
BP	GO:0001944	vasculature development	1/23	230/11595	0.369510618364609	0.395983020874312	gene-pthlha	1	pthlha	0	-	1
BP	GO:0050877	nervous system process	1/23	236/11595	0.377129401291146	0.402944806736671	gene-snai2	1	snai2	0	-	1
BP	GO:0044283	small molecule biosynthetic process	1/23	238/11595	0.379649367713816	0.404433599434006	gene-snai2	1	snai2	0	-	1
BP	GO:0043207	response to external biotic stimulus	1/23	258/11595	0.404318491606875	0.428172089931765	gene-LOC122881039	1	LOC122881039	0	-	1
BP	GO:0051707	response to other organism	1/23	258/11595	0.404318491606875	0.428172089931765	gene-LOC122881039	1	LOC122881039	0	-	1
BP	GO:0044087	regulation of cellular component biogenesis	1/23	264/11595	0.411534350697261	0.434531858530343	gene-snai2	1	snai2	0	-	1
BP	GO:0009607	response to biotic stimulus	1/23	267/11595	0.415110851936971	0.437022861716635	gene-LOC122881039	1	LOC122881039	0	-	1
BP	GO:0051336	regulation of hydrolase activity	1/23	284/11595	0.434988232263021	0.456351416460383	gene-arhgap24	1	arhgap24	0	-	1
BP	GO:0048584	positive regulation of response to stimulus	1/23	286/11595	0.437283808530284	0.456351416460383	gene-snai2	1	snai2	0	-	1
BP	GO:0070925	organelle assembly	1/23	286/11595	0.437283808530284	0.456351416460383	gene-znf703	1	znf703	0	-	1
BP	GO:0042592	homeostatic process	1/23	299/11595	0.451989036618341	0.468971283658914	gene-LOC122881039	1	LOC122881039	0	-	1
BP	GO:0044419	biological process involved in interspecies interaction between organisms	1/23	299/11595	0.451989036618341	0.468971283658914	gene-LOC122881039	1	LOC122881039	0	-	1
BP	GO:0060429	epithelium development	1/23	306/11595	0.459754246210901	0.475653528500615	gene-snai2	1	snai2	0	-	1
BP	GO:0006952	defense response	1/23	311/11595	0.465236267588397	0.478566819668294	gene-LOC122881039	1	LOC122881039	0	-	1
BP	GO:0043085	positive regulation of catalytic activity	1/23	311/11595	0.465236267588397	0.478566819668294	gene-arhgap24	1	arhgap24	0	-	1
BP	GO:1902531	regulation of intracellular signal transduction	1/23	321/11595	0.476041106517659	0.488282163542399	gene-snai2	1	snai2	0	-	1
BP	GO:0048646	anatomical structure formation involved in morphogenesis	1/23	335/11595	0.490817624017926	0.502004350491269	gene-snai2	1	snai2	0	-	1
BP	GO:0044093	positive regulation of molecular function	1/23	345/11595	0.501127330193999	0.511092930510357	gene-arhgap24	1	arhgap24	0	-	1
BP	GO:0030182	neuron differentiation	1/23	372/11595	0.527975745569113	0.536949837561789	gene-id2a	1	id2a	0	-	1
BP	GO:0048699	generation of neurons	1/23	403/11595	0.557097483287514	0.564966091808524	gene-id2a	1	id2a	0	-	1
BP	GO:0050790	regulation of catalytic activity	1/23	417/11595	0.569678422871748	0.576097334678753	gene-arhgap24	1	arhgap24	0	-	1
BP	GO:0022008	neurogenesis	1/23	432/11595	0.582778438265142	0.587689492520185	gene-id2a	1	id2a	0	-	1
BP	GO:0120036	plasma membrane bounded cell projection organization	1/23	434/11595	0.58449601223221	0.587770499695696	gene-znf703	1	znf703	0	-	1
BP	GO:0032879	regulation of localization	1/23	463/11595	0.608653391556248	0.610353540694673	gene-snai2	1	snai2	0	-	1
BP	GO:0030030	cell projection organization	1/23	475/11595	0.618251385934079	0.618251385934079	gene-znf703	1	znf703	0	-	1
CC	GO:0005667	transcription regulator complex	3/27	109/15597	0.000859462248521494	0.00515677349112896	gene-LOC122863684/gene-fosab/gene-smad7	3	fosab/LOC122863684/smad7	0	-	3
CC	GO:0000118	histone deacetylase complex	1/27	25/15597	0.0424223313795641	0.127266994138692	gene-znf703	1	znf703	0	-	1
CC	GO:0000785	chromatin	1/27	173/15597	0.260223124840896	0.520446249681792	gene-snai2	1	snai2	0	-	1
CC	GO:0005815	microtubule organizing center	1/27	280/15597	0.387081940400612	0.577928654689033	gene-wu:fa11c10	1	wu:fa11c10	0	-	1
CC	GO:0005694	chromosome	1/27	405/15597	0.508827662674524	0.577928654689033	gene-snai2	1	snai2	0	-	1
CC	GO:0140513	nuclear protein-containing complex	1/27	490/15597	0.577928654689033	0.577928654689033	gene-znf703	1	znf703	0	-	1
MF	GO:0005520	insulin-like growth factor binding	2/25	34/15230	0.00140526747202379	0.0576368608931448	gene-ccn1/gene-ccn2a	2	ccn1/ccn2a	0	-	2
MF	GO:0019838	growth factor binding	2/25	45/15230	0.00245263237843169	0.0576368608931448	gene-ccn1/gene-ccn2a	2	ccn1/ccn2a	0	-	2
MF	GO:0030546	signaling receptor activator activity	3/25	317/15230	0.0146371241508665	0.122532538400935	gene-LOC122882605/gene-inhbab/gene-pthlha	3	inhbab/LOC122882605/pthlha	2	gene-inhbab/gene-LOC122882605	1
MF	GO:0048018	receptor ligand activity	3/25	317/15230	0.0146371241508665	0.122532538400935	gene-LOC122882605/gene-inhbab/gene-pthlha	3	inhbab/LOC122882605/pthlha	2	gene-inhbab/gene-LOC122882605	1
MF	GO:0030545	receptor regulator activity	3/25	322/15230	0.0152606815674722	0.122532538400935	gene-LOC122882605/gene-inhbab/gene-pthlha	3	inhbab/LOC122882605/pthlha	2	gene-inhbab/gene-LOC122882605	1
MF	GO:0005179	hormone activity	2/25	117/15230	0.0156424517107576	0.122532538400935	gene-inhbab/gene-pthlha	2	inhbab/pthlha	1	gene-inhbab	1
MF	GO:0045125	bioactive lipid receptor activity	1/25	12/15230	0.0195280858124459	0.131117147597851	gene-s1pr5a	1	s1pr5a	1	gene-s1pr5a	0
MF	GO:0042826	histone deacetylase binding	1/25	14/15230	0.0227469671443143	0.133638431972847	gene-znf703	1	znf703	0	-	1
MF	GO:0030291	protein serine/threonine kinase inhibitor activity	1/25	17/15230	0.0275562746156202	0.14390498965935	gene-cdkn1d	1	cdkn1d	1	gene-cdkn1d	0
MF	GO:0004860	protein kinase inhibitor activity	1/25	25/15230	0.0402702711079053	0.156993549557736	gene-cdkn1d	1	cdkn1d	1	gene-cdkn1d	0
MF	GO:0019210	kinase inhibitor activity	1/25	25/15230	0.0402702711079053	0.156993549557736	gene-cdkn1d	1	cdkn1d	1	gene-cdkn1d	0
MF	GO:0016538	cyclin-dependent protein serine/threonine kinase regulator activity	1/25	27/15230	0.043423747750012	0.156993549557736	gene-cdkn1d	1	cdkn1d	1	gene-cdkn1d	0
MF	GO:0061629	RNA polymerase II-specific DNA-binding transcription factor binding	1/25	27/15230	0.043423747750012	0.156993549557736	gene-snai1a	1	snai1a	0	-	1
MF	GO:0140297	DNA-binding transcription factor binding	1/25	44/15230	0.0698296497174787	0.218799569114767	gene-snai1a	1	snai1a	0	-	1
MF	GO:1901981	phosphatidylinositol phosphate binding	1/25	44/15230	0.0698296497174787	0.218799569114767	gene-phlda1	1	phlda1	0	-	1
MF	GO:0001227	DNA-binding transcription repressor activity, RNA polymerase II-specific	1/25	54/15230	0.0850341369379174	0.243422037897211	gene-snai2	1	snai2	0	-	1
MF	GO:0001217	DNA-binding transcription repressor activity	1/25	56/15230	0.0880462690266508	0.243422037897211	gene-snai2	1	snai2	0	-	1
MF	GO:0005201	extracellular matrix structural constituent	1/25	62/15230	0.0970256560278427	0.247368118781737	gene-col1a1b	1	col1a1b	1	gene-col1a1b	0
MF	GO:0019887	protein kinase regulator activity	1/25	64/15230	0.0999998778053832	0.247368118781737	gene-cdkn1d	1	cdkn1d	1	gene-cdkn1d	0
MF	GO:0019207	kinase regulator activity	1/25	73/15230	0.113267888823387	0.266179538734959	gene-cdkn1d	1	cdkn1d	1	gene-cdkn1d	0
MF	GO:0005125	cytokine activity	1/25	84/15230	0.129229448801292	0.279151679051905	gene-LOC122882605	1	LOC122882605	1	gene-LOC122882605	0
MF	GO:0008134	transcription factor binding	1/25	85/15230	0.130666743385998	0.279151679051905	gene-snai1a	1	snai1a	0	-	1
MF	GO:0046983	protein dimerization activity	2/25	403/15230	0.140852840816493	0.287829718190224	gene-bhlhe41/gene-id2a	2	bhlhe41/id2a	1	gene-bhlhe41	1
MF	GO:0016887	ATPase activity	2/25	444/15230	0.164339825945989	0.311831444596833	gene-LOC122869030/Novel.132	2	LOC122869030/Novel.132	0	-	2
MF	GO:0035091	phosphatidylinositol binding	1/25	110/15230	0.165867789679166	0.311831444596833	gene-phlda1	1	phlda1	0	-	1
MF	GO:0003682	chromatin binding	1/25	118/15230	0.176840169461021	0.319672614025691	gene-snai2	1	snai2	0	-	1
MF	GO:0008083	growth factor activity	1/25	130/15230	0.1930393277371	0.336031422357175	gene-inhbab	1	inhbab	1	gene-inhbab	0
MF	GO:0000978	RNA polymerase II cis-regulatory region sequence-specific DNA binding	1/25	169/15230	0.243599977261549	0.380705138851562	gene-snai2	1	snai2	0	-	1
MF	GO:0004857	enzyme inhibitor activity	1/25	172/15230	0.247360659909104	0.380705138851562	gene-cdkn1d	1	cdkn1d	1	gene-cdkn1d	0
MF	GO:0000987	cis-regulatory region sequence-specific DNA binding	1/25	175/15230	0.251103389455286	0.380705138851562	gene-snai2	1	snai2	0	-	1
MF	GO:0005543	phospholipid binding	1/25	175/15230	0.251103389455286	0.380705138851562	gene-phlda1	1	phlda1	0	-	1
MF	GO:0005096	GTPase activator activity	1/25	182/15230	0.259767068241461	0.380979436875234	gene-arhgap24	1	arhgap24	0	-	1
MF	GO:0106310	protein serine kinase activity	1/25	191/15230	0.270764781264152	0.380979436875234	gene-stk40	1	stk40	0	-	1
MF	GO:0106311	protein threonine kinase activity	1/25	195/15230	0.275602145824637	0.380979436875234	gene-stk40	1	stk40	0	-	1
MF	GO:0000977	RNA polymerase II transcription regulatory region sequence-specific DNA binding	1/25	219/15230	0.303985803153387	0.408209507091691	gene-snai2	1	snai2	0	-	1
MF	GO:0008047	enzyme activator activity	1/25	242/15230	0.330182868505052	0.43107207832604	gene-arhgap24	1	arhgap24	0	-	1
MF	GO:0000976	transcription regulatory region sequence-specific DNA binding	1/25	264/15230	0.354353397208157	0.43222781019309	gene-snai2	1	snai2	0	-	1
MF	GO:0001067	regulatory region nucleic acid binding	1/25	264/15230	0.354353397208157	0.43222781019309	gene-snai2	1	snai2	0	-	1
MF	GO:1990837	sequence-specific double-stranded DNA binding	1/25	268/15230	0.358657119096394	0.43222781019309	gene-snai2	1	snai2	0	-	1
MF	GO:0003690	double-stranded DNA binding	1/25	300/15230	0.392109261484923	0.460728382244785	gene-snai2	1	snai2	0	-	1
MF	GO:0008289	lipid binding	1/25	342/15230	0.433480724118757	0.487191834552548	gene-phlda1	1	phlda1	0	-	1
MF	GO:0004674	protein serine/threonine kinase activity	1/25	350/15230	0.44104832952825	0.487191834552548	gene-stk40	1	stk40	0	-	1
MF	GO:0019899	enzyme binding	1/25	355/15230	0.445728699697012	0.487191834552548	gene-znf703	1	znf703	0	-	1
MF	GO:0030695	GTPase regulator activity	1/25	400/15230	0.486192782737155	0.519342290651052	gene-arhgap24	1	arhgap24	0	-	1
MF	GO:0060589	nucleoside-triphosphatase regulator activity	1/25	413/15230	0.497344163025926	0.5194483480493	gene-arhgap24	1	arhgap24	0	-	1
MF	GO:0005198	structural molecule activity	1/25	447/15230	0.52542169103097	0.536843901705556	gene-col1a1b	1	col1a1b	1	gene-col1a1b	0
MF	GO:0000981	DNA-binding transcription factor activity, RNA polymerase II-specific	1/25	481/15230	0.55199020111112	0.55199020111112	gene-snai2	1	snai2	0	-	1
