# Supplementary material for: Siniperca chuatsi Rhabdovirus (SCRV)-Induced Key Pathways and Major Antiviral Genes in Fish Cells
Source: Microorganisms. 2022 Dec 13;10(12):2464. doi: 10.3390/microorganisms10122464 (PMC9788611; doi:10.3390/microorganisms10122464)
Supplement: Supplementary file 1 [file microorganisms-10-02464-s001.zip › Table S3. S0_vs_S12.GO.enrichment.xls]

ONTOLOGY	ID	Description	GeneRatio	BgRatio	pvalue	p.adjust	geneID	Count	GeneName	Up_count	Up_geneID	Down_count
BP	GO:0016477	cell migration	16/178	261/11595	2.55703475108631e-06	0.00184128370723255	gene-swap70a/gene-snai1a/gene-lamb3/gene-LOC122873669/gene-LOC122873767/gene-carmil2/gene-reln/gene-ndnf/gene-LOC122877612/gene-amotl2a/gene-LOC122877917/gene-LOC122881975/gene-LOC122881976/gene-mmp9/gene-snai2/gene-LOC122888653	16	amotl2a/carmil2/lamb3/LOC122873669/LOC122873767/LOC122877612/LOC122877917/LOC122881975/LOC122881976/LOC122888653/mmp9/ndnf/reln/snai1a/snai2/swap70a	8	gene-carmil2/gene-lamb3/gene-LOC122873767/gene-LOC122877917/gene-LOC122881975/gene-LOC122881976/gene-LOC122888653/gene-mmp9	8
BP	GO:0071495	cellular response to endogenous stimulus	14/178	207/11595	3.57184036320572e-06	0.00184128370723255	gene-LOC122863684/gene-LOC122864683/gene-smad6b/gene-ndnf/gene-LOC122877917/gene-sfrp5/gene-snai2/gene-smad9/gene-id2a/gene-LOC122865952/gene-smad7/gene-nog2/gene-wbp2/gene-LOC122871826	14	id2a/LOC122863684/LOC122864683/LOC122865952/LOC122871826/LOC122877917/ndnf/nog2/sfrp5/smad6b/smad7/smad9/snai2/wbp2	3	gene-LOC122864683/gene-LOC122877917/gene-wbp2	11
BP	GO:0071363	cellular response to growth factor stimulus	11/178	142/11595	1.14440075415465e-05	0.00260523612088134	gene-LOC122863684/gene-smad6b/gene-ndnf/gene-LOC122877917/gene-sfrp5/gene-snai2/gene-smad9/gene-id2a/gene-smad7/gene-nog2/gene-LOC122871826	11	id2a/LOC122863684/LOC122871826/LOC122877917/ndnf/nog2/sfrp5/smad6b/smad7/smad9/snai2	1	gene-LOC122877917	10
BP	GO:0070848	response to growth factor	11/178	143/11595	1.22344405333705e-05	0.00260523612088134	gene-LOC122863684/gene-smad6b/gene-ndnf/gene-LOC122877917/gene-sfrp5/gene-snai2/gene-smad9/gene-id2a/gene-smad7/gene-nog2/gene-LOC122871826	11	id2a/LOC122863684/LOC122871826/LOC122877917/ndnf/nog2/sfrp5/smad6b/smad7/smad9/snai2	1	gene-LOC122877917	10
BP	GO:0009719	response to endogenous stimulus	14/178	233/11595	1.39317203812759e-05	0.00260523612088134	gene-LOC122863684/gene-LOC122864683/gene-smad6b/gene-ndnf/gene-LOC122877917/gene-sfrp5/gene-snai2/gene-smad9/gene-id2a/gene-LOC122865952/gene-smad7/gene-nog2/gene-wbp2/gene-LOC122871826	14	id2a/LOC122863684/LOC122864683/LOC122865952/LOC122871826/LOC122877917/ndnf/nog2/sfrp5/smad6b/smad7/smad9/snai2/wbp2	3	gene-LOC122864683/gene-LOC122877917/gene-wbp2	11
BP	GO:0048870	cell motility	16/178	304/11595	1.76883150787288e-05	0.00260523612088134	gene-swap70a/gene-snai1a/gene-lamb3/gene-LOC122873669/gene-LOC122873767/gene-carmil2/gene-reln/gene-ndnf/gene-LOC122877612/gene-amotl2a/gene-LOC122877917/gene-LOC122881975/gene-LOC122881976/gene-mmp9/gene-snai2/gene-LOC122888653	16	amotl2a/carmil2/lamb3/LOC122873669/LOC122873767/LOC122877612/LOC122877917/LOC122881975/LOC122881976/LOC122888653/mmp9/ndnf/reln/snai1a/snai2/swap70a	8	gene-carmil2/gene-lamb3/gene-LOC122873767/gene-LOC122877917/gene-LOC122881975/gene-LOC122881976/gene-LOC122888653/gene-mmp9	8
BP	GO:0051674	localization of cell	16/178	304/11595	1.76883150787288e-05	0.00260523612088134	gene-swap70a/gene-snai1a/gene-lamb3/gene-LOC122873669/gene-LOC122873767/gene-carmil2/gene-reln/gene-ndnf/gene-LOC122877612/gene-amotl2a/gene-LOC122877917/gene-LOC122881975/gene-LOC122881976/gene-mmp9/gene-snai2/gene-LOC122888653	16	amotl2a/carmil2/lamb3/LOC122873669/LOC122873767/LOC122877612/LOC122877917/LOC122881975/LOC122881976/LOC122888653/mmp9/ndnf/reln/snai1a/snai2/swap70a	8	gene-carmil2/gene-lamb3/gene-LOC122873767/gene-LOC122877917/gene-LOC122881975/gene-LOC122881976/gene-LOC122888653/gene-mmp9	8
BP	GO:0007178	transmembrane receptor protein serine/threonine kinase signaling pathway	8/178	81/11595	3.26298107250899e-05	0.00420516685719596	gene-LOC122863684/gene-smad6b/gene-sfrp5/gene-smad9/gene-id2a/gene-smad7/gene-nog2/gene-LOC122871826	8	id2a/LOC122863684/LOC122871826/nog2/sfrp5/smad6b/smad7/smad9	0	-	8
BP	GO:0071310	cellular response to organic substance	16/178	330/11595	4.79993939868502e-05	0.00549859724449362	gene-LOC122863684/gene-LOC122864683/gene-nptx1l/gene-smad6b/gene-ndnf/gene-LOC122877917/gene-sfrp5/gene-snai2/gene-smad9/gene-id2a/gene-LOC122865952/gene-smad7/gene-nog2/gene-wbp2/gene-LOC122868820/gene-LOC122871826	16	id2a/LOC122863684/LOC122864683/LOC122865952/LOC122868820/LOC122871826/LOC122877917/ndnf/nog2/nptx1l/sfrp5/smad6b/smad7/smad9/snai2/wbp2	4	gene-LOC122864683/gene-LOC122877917/gene-nptx1l/gene-wbp2	12
BP	GO:0070887	cellular response to chemical stimulus	18/178	410/11595	5.88088251610277e-05	0.00606318987410196	gene-LOC122863684/gene-swap70a/gene-LOC122864683/gene-LOC122873767/gene-nptx1l/gene-smad6b/gene-ndnf/gene-LOC122877917/gene-sfrp5/gene-snai2/gene-smad9/gene-id2a/gene-LOC122865952/gene-smad7/gene-nog2/gene-wbp2/gene-LOC122868820/gene-LOC122871826	18	id2a/LOC122863684/LOC122864683/LOC122865952/LOC122868820/LOC122871826/LOC122873767/LOC122877917/ndnf/nog2/nptx1l/sfrp5/smad6b/smad7/smad9/snai2/swap70a/wbp2	5	gene-LOC122864683/gene-LOC122873767/gene-LOC122877917/gene-nptx1l/gene-wbp2	13
BP	GO:0045444	fat cell differentiation	5/178	32/11595	0.000115961910122993	0.0108687935760733	gene-lamb3/gene-metrnlb/gene-LOC122877917/gene-snai2/gene-LOC122868714	5	lamb3/LOC122868714/LOC122877917/metrnlb/snai2	3	gene-lamb3/gene-LOC122877917/gene-metrnlb	2
BP	GO:0050900	leukocyte migration	5/178	33/11595	0.000134983140474446	0.0110122000672666	gene-swap70a/gene-LOC122873767/gene-LOC122881975/gene-LOC122881976/gene-mmp9	5	LOC122873767/LOC122881975/LOC122881976/mmp9/swap70a	4	gene-LOC122873767/gene-LOC122881975/gene-LOC122881976/gene-mmp9	1
BP	GO:0006029	proteoglycan metabolic process	4/178	18/11595	0.000138854123059617	0.0110122000672666	gene-xylt1/gene-ndnf/gene-LOC122863823/gene-dcn	4	dcn/LOC122863823/ndnf/xylt1	1	gene-dcn	3
BP	GO:0040011	locomotion	17/178	410/11595	0.00018928760391865	0.0139396799742948	gene-swap70a/gene-snai1a/gene-lamb3/gene-LOC122873669/gene-LOC122873767/gene-carmil2/gene-reln/gene-ndnf/gene-LOC122877612/gene-amotl2a/gene-LOC122877917/gene-LOC122881975/gene-LOC122881976/gene-mmp9/gene-snai2/gene-LOC122888546/gene-LOC122888653	17	amotl2a/carmil2/lamb3/LOC122873669/LOC122873767/LOC122877612/LOC122877917/LOC122881975/LOC122881976/LOC122888546/LOC122888653/mmp9/ndnf/reln/snai1a/snai2/swap70a	8	gene-carmil2/gene-lamb3/gene-LOC122873767/gene-LOC122877917/gene-LOC122881975/gene-LOC122881976/gene-LOC122888653/gene-mmp9	9
BP	GO:0007179	transforming growth factor beta receptor signaling pathway	5/178	38/11595	0.000268309899932244	0.0162722062841261	gene-LOC122863684/gene-smad6b/gene-smad9/gene-smad7/gene-LOC122871826	5	LOC122863684/LOC122871826/smad6b/smad7/smad9	0	-	5
BP	GO:0071559	response to transforming growth factor beta	5/178	38/11595	0.000268309899932244	0.0162722062841261	gene-LOC122863684/gene-smad6b/gene-smad9/gene-smad7/gene-LOC122871826	5	LOC122863684/LOC122871826/smad6b/smad7/smad9	0	-	5
BP	GO:0071560	cellular response to transforming growth factor beta stimulus	5/178	38/11595	0.000268309899932244	0.0162722062841261	gene-LOC122863684/gene-smad6b/gene-smad9/gene-smad7/gene-LOC122871826	5	LOC122863684/LOC122871826/smad6b/smad7/smad9	0	-	5
BP	GO:0006915	apoptotic process	16/178	405/11595	0.000500944411892785	0.0286929827034145	gene-uacab/gene-nptx1l/gene-LOC122875409/gene-LOC122877908/gene-ndnf/gene-boka/gene-LOC122877917/gene-LOC122883012/gene-snai2/gene-angptl4/gene-irf1b/gene-LOC122861357/gene-LOC122865952/gene-trim69/gene-LOC122868820/gene-phlda1	16	angptl4/boka/irf1b/LOC122861357/LOC122865952/LOC122868820/LOC122875409/LOC122877908/LOC122877917/LOC122883012/ndnf/nptx1l/phlda1/snai2/trim69/uacab	8	gene-irf1b/gene-LOC122861357/gene-LOC122875409/gene-LOC122877908/gene-LOC122877917/gene-LOC122883012/gene-nptx1l/gene-trim69	8
BP	GO:0012501	programmed cell death	16/178	416/11595	0.000669523766395948	0.0363304738502222	gene-uacab/gene-nptx1l/gene-LOC122875409/gene-LOC122877908/gene-ndnf/gene-boka/gene-LOC122877917/gene-LOC122883012/gene-snai2/gene-angptl4/gene-irf1b/gene-LOC122861357/gene-LOC122865952/gene-trim69/gene-LOC122868820/gene-phlda1	16	angptl4/boka/irf1b/LOC122861357/LOC122865952/LOC122868820/LOC122875409/LOC122877908/LOC122877917/LOC122883012/ndnf/nptx1l/phlda1/snai2/trim69/uacab	8	gene-irf1b/gene-LOC122861357/gene-LOC122875409/gene-LOC122877908/gene-LOC122877917/gene-LOC122883012/gene-nptx1l/gene-trim69	8
BP	GO:0050873	brown fat cell differentiation	3/178	12/11595	0.000706717803890312	0.0364313027905456	gene-lamb3/gene-metrnlb/gene-LOC122868714	3	lamb3/LOC122868714/metrnlb	2	gene-lamb3/gene-metrnlb	1
BP	GO:0008219	cell death	16/178	437/11595	0.00112851574983624	0.0523766152870627	gene-uacab/gene-nptx1l/gene-LOC122875409/gene-LOC122877908/gene-ndnf/gene-boka/gene-LOC122877917/gene-LOC122883012/gene-snai2/gene-angptl4/gene-irf1b/gene-LOC122861357/gene-LOC122865952/gene-trim69/gene-LOC122868820/gene-phlda1	16	angptl4/boka/irf1b/LOC122861357/LOC122865952/LOC122868820/LOC122875409/LOC122877908/LOC122877917/LOC122883012/ndnf/nptx1l/phlda1/snai2/trim69/uacab	8	gene-irf1b/gene-LOC122861357/gene-LOC122875409/gene-LOC122877908/gene-LOC122877917/gene-LOC122883012/gene-nptx1l/gene-trim69	8
BP	GO:0045600	positive regulation of fat cell differentiation	3/178	14/11595	0.00114314309516492	0.0523766152870627	gene-metrnlb/gene-snai2/gene-LOC122868714	3	LOC122868714/metrnlb/snai2	1	gene-metrnlb	2
BP	GO:0001503	ossification	5/178	52/11595	0.00116844049621963	0.0523766152870627	gene-mmp9/gene-snai2/gene-tgfb3/gene-pthlha/gene-lrrc17	5	lrrc17/mmp9/pthlha/snai2/tgfb3	1	gene-mmp9	4
BP	GO:0071396	cellular response to lipid	4/178	38/11595	0.00263731839003494	0.108888161912633	gene-LOC122877917/gene-snai2/gene-LOC122865952/gene-LOC122868820	4	LOC122865952/LOC122868820/LOC122877917/snai2	1	gene-LOC122877917	3
BP	GO:0010033	response to organic substance	16/178	475/11595	0.00264035310166424	0.108888161912633	gene-LOC122863684/gene-LOC122864683/gene-nptx1l/gene-smad6b/gene-ndnf/gene-LOC122877917/gene-sfrp5/gene-snai2/gene-smad9/gene-id2a/gene-LOC122865952/gene-smad7/gene-nog2/gene-wbp2/gene-LOC122868820/gene-LOC122871826	16	id2a/LOC122863684/LOC122864683/LOC122865952/LOC122868820/LOC122871826/LOC122877917/ndnf/nog2/nptx1l/sfrp5/smad6b/smad7/smad9/snai2/wbp2	4	gene-LOC122864683/gene-LOC122877917/gene-nptx1l/gene-wbp2	12
BP	GO:0002685	regulation of leukocyte migration	3/178	19/11595	0.00287624056040671	0.109829778436271	gene-swap70a/gene-LOC122881975/gene-LOC122881976	3	LOC122881975/LOC122881976/swap70a	2	gene-LOC122881975/gene-LOC122881976	1
BP	GO:0045598	regulation of fat cell differentiation	3/178	19/11595	0.00287624056040671	0.109829778436271	gene-metrnlb/gene-snai2/gene-LOC122868714	3	LOC122868714/metrnlb/snai2	1	gene-metrnlb	2
BP	GO:0001525	angiogenesis	8/178	162/11595	0.00350586189773955	0.12909084344891	gene-LOC122877908/gene-amotl2a/gene-LOC122877917/gene-kdrl/gene-LOC122881975/gene-LOC122881976/gene-angptl4/gene-hspa12b	8	amotl2a/angptl4/hspa12b/kdrl/LOC122877908/LOC122877917/LOC122881975/LOC122881976	5	gene-hspa12b/gene-LOC122877908/gene-LOC122877917/gene-LOC122881975/gene-LOC122881976	3
BP	GO:0045596	negative regulation of cell differentiation	5/178	69/11595	0.00409936744316063	0.140881594463287	gene-zbtb46/gene-snai2/gene-nfkbiaa/gene-nog2/gene-lrrc17	5	lrrc17/nfkbiaa/nog2/snai2/zbtb46	1	gene-nfkbiaa	4
BP	GO:0051216	cartilage development	5/178	69/11595	0.00409936744316063	0.140881594463287	gene-skib/gene-snai2/gene-tgfb3/gene-nog2/gene-dcn	5	dcn/nog2/skib/snai2/tgfb3	1	gene-dcn	4
BP	GO:0008360	regulation of cell shape	3/178	22/11595	0.00441943564497301	0.146981875805393	gene-amotl2a/gene-LOC122867164/gene-LOC122869492	3	amotl2a/LOC122867164/LOC122869492	1	gene-LOC122869492	2
BP	GO:0001568	blood vessel development	9/178	209/11595	0.00494822188871054	0.151848276633374	gene-LOC122877908/gene-amotl2a/gene-LOC122877917/gene-kdrl/gene-LOC122881975/gene-LOC122881976/gene-angptl4/gene-hspa12b/gene-pthlha	9	amotl2a/angptl4/hspa12b/kdrl/LOC122877908/LOC122877917/LOC122881975/LOC122881976/pthlha	5	gene-hspa12b/gene-LOC122877908/gene-LOC122877917/gene-LOC122881975/gene-LOC122881976	4
BP	GO:0043066	negative regulation of apoptotic process	6/178	103/11595	0.00503609218873727	0.151848276633374	gene-LOC122877908/gene-ndnf/gene-LOC122877917/gene-snai2/gene-angptl4/gene-LOC122868820	6	angptl4/LOC122868820/LOC122877908/LOC122877917/ndnf/snai2	2	gene-LOC122877908/gene-LOC122877917	4
BP	GO:0072359	circulatory system development	13/178	375/11595	0.00517426202807311	0.151848276633374	gene-skib/gene-LOC122877908/gene-amotl2a/gene-LOC122877917/gene-kdrl/gene-LOC122881975/gene-LOC122881976/gene-snai2/gene-angptl4/gene-pdzph1/gene-si:ch211-198m17.1/gene-hspa12b/gene-pthlha	13	amotl2a/angptl4/hspa12b/kdrl/LOC122877908/LOC122877917/LOC122881975/LOC122881976/pdzph1/pthlha/si:ch211-198m17.1/skib/snai2	6	gene-hspa12b/gene-LOC122877908/gene-LOC122877917/gene-LOC122881975/gene-LOC122881976/gene-pdzph1	7
BP	GO:0043069	negative regulation of programmed cell death	6/178	104/11595	0.00527796249544572	0.151848276633374	gene-LOC122877908/gene-ndnf/gene-LOC122877917/gene-snai2/gene-angptl4/gene-LOC122868820	6	angptl4/LOC122868820/LOC122877908/LOC122877917/ndnf/snai2	2	gene-LOC122877908/gene-LOC122877917	4
BP	GO:0034329	cell junction assembly	4/178	46/11595	0.00530217066809066	0.151848276633374	gene-nptx1l/gene-pclob/gene-snai2/gene-si:ch211-198m17.1	4	nptx1l/pclob/si:ch211-198m17.1/snai2	2	gene-nptx1l/gene-pclob	2
BP	GO:0045595	regulation of cell differentiation	9/178	213/11595	0.00559076528641458	0.154091855376263	gene-metrnlb/gene-LOC122877917/gene-zbtb46/gene-snai2/gene-id2a/gene-nfkbiaa/gene-nog2/gene-LOC122868714/gene-lrrc17	9	id2a/LOC122868714/LOC122877917/lrrc17/metrnlb/nfkbiaa/nog2/snai2/zbtb46	3	gene-LOC122877917/gene-metrnlb/gene-nfkbiaa	6
BP	GO:0060326	cell chemotaxis	3/178	24/11595	0.00567942822919302	0.154091855376263	gene-swap70a/gene-LOC122873767/gene-snai2	3	LOC122873767/snai2/swap70a	1	gene-LOC122873767	2
BP	GO:0060026	convergent extension	4/178	48/11595	0.00617428502316545	0.161300056153091	gene-LOC122877612/gene-amotl2a/gene-dcn/gene-LOC122871826	4	amotl2a/dcn/LOC122871826/LOC122877612	1	gene-dcn	3
BP	GO:0001501	skeletal system development	7/178	142/11595	0.00625800411845164	0.161300056153091	gene-skib/gene-snai2/gene-tgfb3/gene-nog2/gene-pthlha/gene-dcn/gene-lrrc17	7	dcn/lrrc17/nog2/pthlha/skib/snai2/tgfb3	1	gene-dcn	6
BP	GO:1901701	cellular response to oxygen-containing compound	6/178	109/11595	0.00661685245881248	0.166389631342333	gene-LOC122864683/gene-nptx1l/gene-LOC122877917/gene-snai2/gene-LOC122865952/gene-LOC122868820	6	LOC122864683/LOC122865952/LOC122868820/LOC122877917/nptx1l/snai2	3	gene-LOC122864683/gene-LOC122877917/gene-nptx1l	3
BP	GO:0007267	cell-cell signaling	12/178	345/11595	0.00694893479907222	0.170579804234368	gene-nptx1l/gene-plpp3/gene-LOC122877917/gene-htr4/gene-sfrp5/gene-LOC122884881/gene-wnt6b/gene-tmem198a/gene-snai2/gene-wnt5b/gene-LOC122871213/gene-LOC122871823	12	htr4/LOC122871213/LOC122871823/LOC122877917/LOC122884881/nptx1l/plpp3/sfrp5/snai2/tmem198a/wnt5b/wnt6b	4	gene-LOC122877917/gene-nptx1l/gene-tmem198a/gene-wnt6b	8
BP	GO:0016055	Wnt signaling pathway	8/178	184/11595	0.00747579870887278	0.17787725101621	gene-plpp3/gene-LOC122877917/gene-sfrp5/gene-LOC122884881/gene-wnt6b/gene-tmem198a/gene-snai2/gene-wnt5b	8	LOC122877917/LOC122884881/plpp3/sfrp5/snai2/tmem198a/wnt5b/wnt6b	3	gene-LOC122877917/gene-tmem198a/gene-wnt6b	5
BP	GO:0198738	cell-cell signaling by wnt	8/178	185/11595	0.00771410405006825	0.17787725101621	gene-plpp3/gene-LOC122877917/gene-sfrp5/gene-LOC122884881/gene-wnt6b/gene-tmem198a/gene-snai2/gene-wnt5b	8	LOC122877917/LOC122884881/plpp3/sfrp5/snai2/tmem198a/wnt5b/wnt6b	3	gene-LOC122877917/gene-tmem198a/gene-wnt6b	5
BP	GO:0034330	cell junction organization	6/178	113/11595	0.00785342802423147	0.17787725101621	gene-nptx1l/gene-pclob/gene-snai2/gene-cnksr1/gene-pdzph1/gene-si:ch211-198m17.1	6	cnksr1/nptx1l/pclob/pdzph1/si:ch211-198m17.1/snai2	3	gene-nptx1l/gene-pclob/gene-pdzph1	3
BP	GO:0045216	cell-cell junction organization	3/178	27/11595	0.00793632739742549	0.17787725101621	gene-snai2/gene-pdzph1/gene-si:ch211-198m17.1	3	pdzph1/si:ch211-198m17.1/snai2	1	gene-pdzph1	2
BP	GO:0006952	defense response	11/178	311/11595	0.00852755923232871	0.183228311027071	gene-LOC122873767/gene-metrnlb/gene-LOC122876711/gene-LOC122877917/gene-ptx3a/gene-LOC122881975/gene-LOC122881976/gene-LOC122881038/gene-LOC122881039/gene-LOC122884604/gene-LOC122868714	11	LOC122868714/LOC122873767/LOC122876711/LOC122877917/LOC122881038/LOC122881039/LOC122881975/LOC122881976/LOC122884604/metrnlb/ptx3a	8	gene-LOC122873767/gene-LOC122876711/gene-LOC122877917/gene-LOC122881975/gene-LOC122881976/gene-LOC122884604/gene-metrnlb/gene-ptx3a	3
BP	GO:0060548	negative regulation of cell death	6/178	115/11595	0.00853051302550866	0.183228311027071	gene-LOC122877908/gene-ndnf/gene-LOC122877917/gene-snai2/gene-angptl4/gene-LOC122868820	6	angptl4/LOC122868820/LOC122877908/LOC122877917/ndnf/snai2	2	gene-LOC122877908/gene-LOC122877917	4
BP	GO:0048514	blood vessel morphogenesis	8/178	189/11595	0.00872496245781947	0.183580332530855	gene-LOC122877908/gene-amotl2a/gene-LOC122877917/gene-kdrl/gene-LOC122881975/gene-LOC122881976/gene-angptl4/gene-hspa12b	8	amotl2a/angptl4/hspa12b/kdrl/LOC122877908/LOC122877917/LOC122881975/LOC122881976	5	gene-hspa12b/gene-LOC122877908/gene-LOC122877917/gene-LOC122881975/gene-LOC122881976	3
BP	GO:0001944	vasculature development	9/178	230/11595	0.00906991778853503	0.185247175555687	gene-LOC122877908/gene-amotl2a/gene-LOC122877917/gene-kdrl/gene-LOC122881975/gene-LOC122881976/gene-angptl4/gene-hspa12b/gene-pthlha	9	amotl2a/angptl4/hspa12b/kdrl/LOC122877908/LOC122877917/LOC122881975/LOC122881976/pthlha	5	gene-hspa12b/gene-LOC122877908/gene-LOC122877917/gene-LOC122881975/gene-LOC122881976	4
BP	GO:0030334	regulation of cell migration	6/178	118/11595	0.00962330906474955	0.185247175555687	gene-swap70a/gene-LOC122877917/gene-LOC122881975/gene-LOC122881976/gene-snai2/gene-LOC122888653	6	LOC122877917/LOC122881975/LOC122881976/LOC122888653/snai2/swap70a	4	gene-LOC122877917/gene-LOC122881975/gene-LOC122881976/gene-LOC122888653	2
BP	GO:0002200	somatic diversification of immune receptors	2/178	10/11595	0.0097254583505365	0.185247175555687	gene-swap70a/gene-LOC122868820	2	LOC122868820/swap70a	0	-	2
BP	GO:0002762	negative regulation of myeloid leukocyte differentiation	2/178	10/11595	0.0097254583505365	0.185247175555687	gene-zbtb46/gene-lrrc17	2	lrrc17/zbtb46	0	-	2
BP	GO:0050921	positive regulation of chemotaxis	2/178	10/11595	0.0097254583505365	0.185247175555687	gene-swap70a/gene-snai2	2	snai2/swap70a	0	-	2
BP	GO:0051093	negative regulation of developmental process	6/178	119/11595	0.0100087965787441	0.185247175555687	gene-LOC122877917/gene-zbtb46/gene-snai2/gene-nfkbiaa/gene-nog2/gene-lrrc17	6	LOC122877917/lrrc17/nfkbiaa/nog2/snai2/zbtb46	2	gene-LOC122877917/gene-nfkbiaa	4
BP	GO:1905114	cell surface receptor signaling pathway involved in cell-cell signaling	8/178	195/11595	0.0104232220364743	0.185247175555687	gene-plpp3/gene-LOC122877917/gene-sfrp5/gene-LOC122884881/gene-wnt6b/gene-tmem198a/gene-snai2/gene-wnt5b	8	LOC122877917/LOC122884881/plpp3/sfrp5/snai2/tmem198a/wnt5b/wnt6b	3	gene-LOC122877917/gene-tmem198a/gene-wnt6b	5
BP	GO:0050793	regulation of developmental process	13/178	412/11595	0.0109941364361616	0.185247175555687	gene-metrnlb/gene-amotl2a/gene-LOC122877917/gene-zbtb46/gene-snai2/gene-tgfb3/gene-id2a/gene-nfkbiaa/gene-nog2/gene-LOC122867164/gene-LOC122868714/gene-LOC122869492/gene-lrrc17	13	amotl2a/id2a/LOC122867164/LOC122868714/LOC122869492/LOC122877917/lrrc17/metrnlb/nfkbiaa/nog2/snai2/tgfb3/zbtb46	4	gene-LOC122869492/gene-LOC122877917/gene-metrnlb/gene-nfkbiaa	9
BP	GO:0002009	morphogenesis of an epithelium	7/178	160/11595	0.0116860705190781	0.185247175555687	gene-skib/gene-LOC122877612/gene-amotl2a/gene-LOC122877917/gene-snai2/gene-dcn/gene-LOC122871826	7	amotl2a/dcn/LOC122871826/LOC122877612/LOC122877917/skib/snai2	2	gene-dcn/gene-LOC122877917	5
BP	GO:0007584	response to nutrient	2/178	11/11595	0.0117675437784558	0.185247175555687	gene-snai2/gene-LOC122865952	2	LOC122865952/snai2	0	-	2
BP	GO:0015012	heparan sulfate proteoglycan biosynthetic process	2/178	11/11595	0.0117675437784558	0.185247175555687	gene-xylt1/gene-LOC122863823	2	LOC122863823/xylt1	0	-	2
BP	GO:0032104	regulation of response to extracellular stimulus	2/178	11/11595	0.0117675437784558	0.185247175555687	gene-snai2/gene-LOC122865952	2	LOC122865952/snai2	0	-	2
BP	GO:0032107	regulation of response to nutrient levels	2/178	11/11595	0.0117675437784558	0.185247175555687	gene-snai2/gene-LOC122865952	2	LOC122865952/snai2	0	-	2
BP	GO:0032602	chemokine production	2/178	11/11595	0.0117675437784558	0.185247175555687	gene-LOC122877917/gene-snai2	2	LOC122877917/snai2	1	gene-LOC122877917	1
BP	GO:0032642	regulation of chemokine production	2/178	11/11595	0.0117675437784558	0.185247175555687	gene-LOC122877917/gene-snai2	2	LOC122877917/snai2	1	gene-LOC122877917	1
BP	GO:0044057	regulation of system process	5/178	89/11595	0.0118586940704901	0.185247175555687	gene-nptx1l/gene-parvb/gene-LOC122877917/gene-edn1/gene-pdzph1	5	edn1/LOC122877917/nptx1l/parvb/pdzph1	4	gene-LOC122877917/gene-nptx1l/gene-parvb/gene-pdzph1	1
BP	GO:0061448	connective tissue development	5/178	89/11595	0.0118586940704901	0.185247175555687	gene-skib/gene-snai2/gene-tgfb3/gene-nog2/gene-dcn	5	dcn/nog2/skib/snai2/tgfb3	1	gene-dcn	4
BP	GO:2000145	regulation of cell motility	6/178	124/11595	0.0121025087159999	0.186234126659641	gene-swap70a/gene-LOC122877917/gene-LOC122881975/gene-LOC122881976/gene-snai2/gene-LOC122888653	6	LOC122877917/LOC122881975/LOC122881976/LOC122888653/snai2/swap70a	4	gene-LOC122877917/gene-LOC122881975/gene-LOC122881976/gene-LOC122888653	2
BP	GO:0030201	heparan sulfate proteoglycan metabolic process	2/178	12/11595	0.0139797089733688	0.203172974163918	gene-xylt1/gene-LOC122863823	2	LOC122863823/xylt1	0	-	2
BP	GO:0010638	positive regulation of organelle organization	5/178	93/11595	0.0141432929843803	0.203172974163918	gene-swap70a/gene-fmn2a/gene-LOC122886528/gene-snai2/gene-LOC122861414	5	fmn2a/LOC122861414/LOC122886528/snai2/swap70a	2	gene-LOC122861414/gene-LOC122886528	3
BP	GO:0048646	anatomical structure formation involved in morphogenesis	11/178	335/11595	0.0142971528032564	0.203172974163918	gene-LOC122877908/gene-amotl2a/gene-LOC122877917/gene-kdrl/gene-LOC122881975/gene-LOC122881976/gene-myofl/gene-snai2/gene-angptl4/gene-hspa12b/gene-rpgrb	11	amotl2a/angptl4/hspa12b/kdrl/LOC122877908/LOC122877917/LOC122881975/LOC122881976/myofl/rpgrb/snai2	5	gene-hspa12b/gene-LOC122877908/gene-LOC122877917/gene-LOC122881975/gene-LOC122881976	6
BP	GO:0030111	regulation of Wnt signaling pathway	5/178	95/11595	0.0153893843201198	0.203172974163918	gene-plpp3/gene-sfrp5/gene-LOC122884881/gene-tmem198a/gene-snai2	5	LOC122884881/plpp3/sfrp5/snai2/tmem198a	1	gene-tmem198a	4
BP	GO:0051270	regulation of cellular component movement	6/178	132/11595	0.0160658191339039	0.203172974163918	gene-swap70a/gene-LOC122877917/gene-LOC122881975/gene-LOC122881976/gene-snai2/gene-LOC122888653	6	LOC122877917/LOC122881975/LOC122881976/LOC122888653/snai2/swap70a	4	gene-LOC122877917/gene-LOC122881975/gene-LOC122881976/gene-LOC122888653	2
BP	GO:0030509	BMP signaling pathway	3/178	35/11595	0.0162417497957731	0.203172974163918	gene-sfrp5/gene-id2a/gene-nog2	3	id2a/nog2/sfrp5	0	-	3
BP	GO:0071772	response to BMP	3/178	35/11595	0.0162417497957731	0.203172974163918	gene-sfrp5/gene-id2a/gene-nog2	3	id2a/nog2/sfrp5	0	-	3
BP	GO:0071773	cellular response to BMP stimulus	3/178	35/11595	0.0162417497957731	0.203172974163918	gene-sfrp5/gene-id2a/gene-nog2	3	id2a/nog2/sfrp5	0	-	3
BP	GO:0007043	cell-cell junction assembly	2/178	13/11595	0.0163563112081525	0.203172974163918	gene-snai2/gene-si:ch211-198m17.1	2	si:ch211-198m17.1/snai2	0	-	2
BP	GO:0009409	response to cold	2/178	13/11595	0.0163563112081525	0.203172974163918	gene-metrnlb/gene-LOC122868714	2	LOC122868714/metrnlb	1	gene-metrnlb	1
BP	GO:0010508	positive regulation of autophagy	2/178	13/11595	0.0163563112081525	0.203172974163918	gene-LOC122886528/gene-dcn	2	dcn/LOC122886528	2	gene-dcn/gene-LOC122886528	0
BP	GO:0018149	peptide cross-linking	2/178	13/11595	0.0163563112081525	0.203172974163918	gene-tgm2b/gene-ndnf	2	ndnf/tgm2b	0	-	2
BP	GO:0045638	negative regulation of myeloid cell differentiation	2/178	13/11595	0.0163563112081525	0.203172974163918	gene-zbtb46/gene-lrrc17	2	lrrc17/zbtb46	0	-	2
BP	GO:0060840	artery development	2/178	13/11595	0.0163563112081525	0.203172974163918	gene-amotl2a/gene-pthlha	2	amotl2a/pthlha	0	-	2
BP	GO:1902807	negative regulation of cell cycle G1/S phase transition	2/178	13/11595	0.0163563112081525	0.203172974163918	gene-LOC122877917/gene-LOC122865952	2	LOC122865952/LOC122877917	1	gene-LOC122877917	1
BP	GO:2000134	negative regulation of G1/S transition of mitotic cell cycle	2/178	13/11595	0.0163563112081525	0.203172974163918	gene-LOC122877917/gene-LOC122865952	2	LOC122865952/LOC122877917	1	gene-LOC122877917	1
BP	GO:0006935	chemotaxis	6/178	134/11595	0.0171819032557242	0.210887407817282	gene-swap70a/gene-LOC122873767/gene-LOC122881975/gene-LOC122881976/gene-snai2/gene-LOC122888546	6	LOC122873767/LOC122881975/LOC122881976/LOC122888546/snai2/swap70a	3	gene-LOC122873767/gene-LOC122881975/gene-LOC122881976	3
BP	GO:0007167	enzyme linked receptor protein signaling pathway	9/178	257/11595	0.0176803247735574	0.214451939312208	gene-LOC122863684/gene-smad6b/gene-kdrl/gene-sfrp5/gene-smad9/gene-id2a/gene-smad7/gene-nog2/gene-LOC122871826	9	id2a/kdrl/LOC122863684/LOC122871826/nog2/sfrp5/smad6b/smad7/smad9	0	-	9
BP	GO:0002761	regulation of myeloid leukocyte differentiation	2/178	14/11595	0.0188918392269837	0.219334940322424	gene-zbtb46/gene-lrrc17	2	lrrc17/zbtb46	0	-	2
BP	GO:0030166	proteoglycan biosynthetic process	2/178	14/11595	0.0188918392269837	0.219334940322424	gene-xylt1/gene-LOC122863823	2	LOC122863823/xylt1	0	-	2
BP	GO:0061035	regulation of cartilage development	2/178	14/11595	0.0188918392269837	0.219334940322424	gene-snai2/gene-tgfb3	2	snai2/tgfb3	0	-	2
BP	GO:0035239	tube morphogenesis	9/178	261/11595	0.0193399799509847	0.219334940322424	gene-skib/gene-LOC122877908/gene-amotl2a/gene-LOC122877917/gene-kdrl/gene-LOC122881975/gene-LOC122881976/gene-angptl4/gene-hspa12b	9	amotl2a/angptl4/hspa12b/kdrl/LOC122877908/LOC122877917/LOC122881975/LOC122881976/skib	5	gene-hspa12b/gene-LOC122877908/gene-LOC122877917/gene-LOC122881975/gene-LOC122881976	4
BP	GO:0042981	regulation of apoptotic process	9/178	261/11595	0.0193399799509847	0.219334940322424	gene-LOC122877908/gene-ndnf/gene-boka/gene-LOC122877917/gene-snai2/gene-angptl4/gene-trim69/gene-LOC122868820/gene-phlda1	9	angptl4/boka/LOC122868820/LOC122877908/LOC122877917/ndnf/phlda1/snai2/trim69	3	gene-LOC122877908/gene-LOC122877917/gene-trim69	6
BP	GO:0040012	regulation of locomotion	6/178	138/11595	0.0195720800287711	0.219334940322424	gene-swap70a/gene-LOC122877917/gene-LOC122881975/gene-LOC122881976/gene-snai2/gene-LOC122888653	6	LOC122877917/LOC122881975/LOC122881976/LOC122888653/snai2/swap70a	4	gene-LOC122877917/gene-LOC122881975/gene-LOC122881976/gene-LOC122888653	2
BP	GO:0042330	taxis	6/178	138/11595	0.0195720800287711	0.219334940322424	gene-swap70a/gene-LOC122873767/gene-LOC122881975/gene-LOC122881976/gene-snai2/gene-LOC122888546	6	LOC122873767/LOC122881975/LOC122881976/LOC122888546/snai2/swap70a	3	gene-LOC122873767/gene-LOC122881975/gene-LOC122881976	3
BP	GO:0043067	regulation of programmed cell death	9/178	264/11595	0.0206569958329454	0.223658770565023	gene-LOC122877908/gene-ndnf/gene-boka/gene-LOC122877917/gene-snai2/gene-angptl4/gene-trim69/gene-LOC122868820/gene-phlda1	9	angptl4/boka/LOC122868820/LOC122877908/LOC122877917/ndnf/phlda1/snai2/trim69	3	gene-LOC122877908/gene-LOC122877917/gene-trim69	6
BP	GO:0002274	myeloid leukocyte activation	2/178	15/11595	0.0215809105757233	0.223658770565023	gene-LOC122873767/gene-ndrg1a	2	LOC122873767/ndrg1a	2	gene-LOC122873767/gene-ndrg1a	0
BP	GO:0010594	regulation of endothelial cell migration	2/178	15/11595	0.0215809105757233	0.223658770565023	gene-LOC122877917/gene-snai2	2	LOC122877917/snai2	1	gene-LOC122877917	1
BP	GO:1902106	negative regulation of leukocyte differentiation	2/178	15/11595	0.0215809105757233	0.223658770565023	gene-zbtb46/gene-lrrc17	2	lrrc17/zbtb46	0	-	2
BP	GO:1903707	negative regulation of hemopoiesis	2/178	15/11595	0.0215809105757233	0.223658770565023	gene-zbtb46/gene-lrrc17	2	lrrc17/zbtb46	0	-	2
BP	GO:2000045	regulation of G1/S transition of mitotic cell cycle	2/178	15/11595	0.0215809105757233	0.223658770565023	gene-LOC122877917/gene-LOC122865952	2	LOC122865952/LOC122877917	1	gene-LOC122877917	1
BP	GO:0007162	negative regulation of cell adhesion	3/178	39/11595	0.0216933822080527	0.223658770565023	gene-swap70a/gene-LOC122877917/gene-snai2	3	LOC122877917/snai2/swap70a	1	gene-LOC122877917	2
BP	GO:0051017	actin filament bundle assembly	3/178	39/11595	0.0216933822080527	0.223658770565023	gene-swap70a/gene-LOC122880325/gene-LOC122867164	3	LOC122867164/LOC122880325/swap70a	1	gene-LOC122880325	2
BP	GO:0010632	regulation of epithelial cell migration	2/178	16/11595	0.0244182689825539	0.2430137542969	gene-LOC122877917/gene-snai2	2	LOC122877917/snai2	1	gene-LOC122877917	1
BP	GO:0050920	regulation of chemotaxis	2/178	16/11595	0.0244182689825539	0.2430137542969	gene-swap70a/gene-snai2	2	snai2/swap70a	0	-	2
BP	GO:0097529	myeloid leukocyte migration	2/178	16/11595	0.0244182689825539	0.2430137542969	gene-swap70a/gene-LOC122873767	2	LOC122873767/swap70a	1	gene-LOC122873767	1
BP	GO:0010506	regulation of autophagy	3/178	41/11595	0.0247492184298492	0.2430137542969	gene-ctns/gene-LOC122886528/gene-dcn	3	ctns/dcn/LOC122886528	3	gene-ctns/gene-dcn/gene-LOC122886528	0
BP	GO:0061572	actin filament bundle organization	3/178	41/11595	0.0247492184298492	0.2430137542969	gene-swap70a/gene-LOC122880325/gene-LOC122867164	3	LOC122867164/LOC122880325/swap70a	1	gene-LOC122880325	2
BP	GO:0048729	tissue morphogenesis	7/178	188/11595	0.0259091349793491	0.252003001544424	gene-skib/gene-LOC122877612/gene-amotl2a/gene-LOC122877917/gene-snai2/gene-dcn/gene-LOC122871826	7	amotl2a/dcn/LOC122871826/LOC122877612/LOC122877917/skib/snai2	2	gene-dcn/gene-LOC122877917	5
BP	GO:0042127	regulation of cell population proliferation	8/178	233/11595	0.0273225684233475	0.26155688910557	gene-LOC122877917/gene-LOC122883012/gene-snai2/gene-irf1b/gene-id2a/gene-fgfr3/gene-ndrg1a/gene-LOC122865952	8	fgfr3/id2a/irf1b/LOC122865952/LOC122877917/LOC122883012/ndrg1a/snai2	4	gene-irf1b/gene-LOC122877917/gene-LOC122883012/gene-ndrg1a	4
BP	GO:0072593	reactive oxygen species metabolic process	2/178	17/11595	0.0273987817879744	0.26155688910557	gene-ddah1/gene-LOC122877917	2	ddah1/LOC122877917	1	gene-LOC122877917	1
BP	GO:0071407	cellular response to organic cyclic compound	3/178	43/11595	0.0280250093749672	0.263167890472853	gene-LOC122877917/gene-snai2/gene-LOC122865952	3	LOC122865952/LOC122877917/snai2	1	gene-LOC122877917	2
BP	GO:0051130	positive regulation of cellular component organization	6/178	150/11595	0.0280780484500619	0.263167890472853	gene-swap70a/gene-ndnf/gene-fmn2a/gene-LOC122886528/gene-snai2/gene-LOC122861414	6	fmn2a/LOC122861414/LOC122886528/ndnf/snai2/swap70a	2	gene-LOC122861414/gene-LOC122886528	4
BP	GO:0010941	regulation of cell death	9/178	282/11595	0.0299493894649823	0.27817856340898	gene-LOC122877908/gene-ndnf/gene-boka/gene-LOC122877917/gene-snai2/gene-angptl4/gene-trim69/gene-LOC122868820/gene-phlda1	9	angptl4/boka/LOC122868820/LOC122877908/LOC122877917/ndnf/phlda1/snai2/trim69	3	gene-LOC122877908/gene-LOC122877917/gene-trim69	6
BP	GO:0002440	production of molecular mediator of immune response	2/178	18/11595	0.0305174374232625	0.280923910565925	gene-swap70a/gene-LOC122868820	2	LOC122868820/swap70a	0	-	2
BP	GO:0032101	regulation of response to external stimulus	6/178	155/11595	0.0322462544617374	0.294211401327887	gene-swap70a/gene-metrnlb/gene-LOC122877917/gene-snai2/gene-LOC122865952/gene-LOC122868714	6	LOC122865952/LOC122868714/LOC122877917/metrnlb/snai2/swap70a	2	gene-LOC122877917/gene-metrnlb	4
BP	GO:0022604	regulation of cell morphogenesis	3/178	47/11595	0.0352323237985507	0.315865442054833	gene-amotl2a/gene-LOC122867164/gene-LOC122869492	3	amotl2a/LOC122867164/LOC122869492	1	gene-LOC122869492	2
BP	GO:0031667	response to nutrient levels	3/178	47/11595	0.0352323237985507	0.315865442054833	gene-htr4/gene-snai2/gene-LOC122865952	3	htr4/LOC122865952/snai2	0	-	3
BP	GO:0008283	cell population proliferation	9/178	293/11595	0.0368908052199697	0.31934818084556	gene-amotl2a/gene-LOC122877917/gene-LOC122883012/gene-snai2/gene-irf1b/gene-id2a/gene-fgfr3/gene-ndrg1a/gene-LOC122865952	9	amotl2a/fgfr3/id2a/irf1b/LOC122865952/LOC122877917/LOC122883012/ndrg1a/snai2	4	gene-irf1b/gene-LOC122877917/gene-LOC122883012/gene-ndrg1a	5
BP	GO:0006879	cellular iron ion homeostasis	2/178	20/11595	0.0371497215655798	0.31934818084556	gene-LOC122881038/gene-LOC122881039	2	LOC122881038/LOC122881039	0	-	2
BP	GO:0030595	leukocyte chemotaxis	2/178	20/11595	0.0371497215655798	0.31934818084556	gene-swap70a/gene-LOC122873767	2	LOC122873767/swap70a	1	gene-LOC122873767	1
BP	GO:1902806	regulation of cell cycle G1/S phase transition	2/178	20/11595	0.0371497215655798	0.31934818084556	gene-LOC122877917/gene-LOC122865952	2	LOC122865952/LOC122877917	1	gene-LOC122877917	1
BP	GO:0009991	response to extracellular stimulus	3/178	48/11595	0.0371695263835763	0.31934818084556	gene-htr4/gene-snai2/gene-LOC122865952	3	htr4/LOC122865952/snai2	0	-	3
BP	GO:0045930	negative regulation of mitotic cell cycle	3/178	49/11595	0.039160319501781	0.333671813275506	gene-LOC122877917/gene-id2a/gene-LOC122865952	3	id2a/LOC122865952/LOC122877917	1	gene-LOC122877917	2
BP	GO:0030155	regulation of cell adhesion	4/178	84/11595	0.040149480485904	0.336537515292415	gene-swap70a/gene-ndnf/gene-LOC122877917/gene-snai2	4	LOC122877917/ndnf/snai2/swap70a	1	gene-LOC122877917	3
BP	GO:0055082	cellular chemical homeostasis	4/178	84/11595	0.040149480485904	0.336537515292415	gene-swap70a/gene-nptx1l/gene-LOC122881038/gene-LOC122881039	4	LOC122881038/LOC122881039/nptx1l/swap70a	1	gene-nptx1l	3
BP	GO:0045637	regulation of myeloid cell differentiation	2/178	21/11595	0.0406539103565247	0.338017593367556	gene-zbtb46/gene-lrrc17	2	lrrc17/zbtb46	0	-	2
BP	GO:0090092	regulation of transmembrane receptor protein serine/threonine kinase signaling pathway	3/178	50/11595	0.0412043692395701	0.339462162332399	gene-sfrp5/gene-nog2/gene-LOC122871826	3	LOC122871826/nog2/sfrp5	0	-	3
BP	GO:0006954	inflammatory response	6/178	165/11595	0.0417450453874615	0.339462162332399	gene-LOC122873767/gene-metrnlb/gene-LOC122876711/gene-LOC122881975/gene-LOC122881976/gene-LOC122868714	6	LOC122868714/LOC122873767/LOC122876711/LOC122881975/LOC122881976/metrnlb	5	gene-LOC122873767/gene-LOC122876711/gene-LOC122881975/gene-LOC122881976/gene-metrnlb	1
BP	GO:0006914	autophagy	5/178	124/11595	0.0421446719481543	0.339462162332399	gene-map1lc3c/gene-ctns/gene-wdfy4/gene-LOC122886528/gene-dcn	5	ctns/dcn/LOC122886528/map1lc3c/wdfy4	5	gene-ctns/gene-dcn/gene-LOC122886528/gene-map1lc3c/gene-wdfy4	0
BP	GO:0061919	process utilizing autophagic mechanism	5/178	124/11595	0.0421446719481543	0.339462162332399	gene-map1lc3c/gene-ctns/gene-wdfy4/gene-LOC122886528/gene-dcn	5	ctns/dcn/LOC122886528/map1lc3c/wdfy4	5	gene-ctns/gene-dcn/gene-LOC122886528/gene-map1lc3c/gene-wdfy4	0
BP	GO:0008285	negative regulation of cell population proliferation	5/178	125/11595	0.0433775503669091	0.346684142854909	gene-LOC122877917/gene-LOC122883012/gene-snai2/gene-irf1b/gene-LOC122865952	5	irf1b/LOC122865952/LOC122877917/LOC122883012/snai2	3	gene-irf1b/gene-LOC122877917/gene-LOC122883012	2
BP	GO:0030510	regulation of BMP signaling pathway	2/178	22/11595	0.0442773578276799	0.348472945956778	gene-sfrp5/gene-nog2	2	nog2/sfrp5	0	-	2
BP	GO:1901888	regulation of cell junction assembly	2/178	22/11595	0.0442773578276799	0.348472945956778	gene-nptx1l/gene-snai2	2	nptx1l/snai2	1	gene-nptx1l	1
BP	GO:0007369	gastrulation	4/178	87/11595	0.0447338057818605	0.349398134553774	gene-snai1a/gene-LOC122877612/gene-LOC122877917/gene-LOC122871826	4	LOC122871826/LOC122877612/LOC122877917/snai1a	1	gene-LOC122877917	3
BP	GO:0001667	ameboidal-type cell migration	4/178	88/11595	0.0463244857126597	0.359101840374076	gene-snai1a/gene-LOC122877612/gene-LOC122877917/gene-snai2	4	LOC122877612/LOC122877917/snai1a/snai2	1	gene-LOC122877917	3
BP	GO:1903522	regulation of blood circulation	3/178	53/11595	0.0476522946975646	0.36663817785962	gene-parvb/gene-edn1/gene-pdzph1	3	edn1/parvb/pdzph1	2	gene-parvb/gene-pdzph1	1
BP	GO:0006875	cellular metal ion homeostasis	3/178	54/11595	0.0499054752297473	0.378832098990887	gene-swap70a/gene-LOC122881038/gene-LOC122881039	3	LOC122881038/LOC122881039/swap70a	0	-	3
BP	GO:0002520	immune system development	7/178	217/11595	0.0499720324566059	0.378832098990887	gene-swap70a/gene-LOC122877917/gene-zbtb46/gene-tgfb3/gene-nfkbiaa/gene-LOC122868820/gene-lrrc17	7	LOC122868820/LOC122877917/lrrc17/nfkbiaa/swap70a/tgfb3/zbtb46	2	gene-LOC122877917/gene-nfkbiaa	5
BP	GO:0060070	canonical Wnt signaling pathway	3/178	56/11595	0.0545648918403164	0.408154340251003	gene-LOC122877917/gene-tmem198a/gene-snai2	3	LOC122877917/snai2/tmem198a	2	gene-LOC122877917/gene-tmem198a	1
BP	GO:0000082	G1/S transition of mitotic cell cycle	2/178	25/11595	0.0558193617608064	0.408154340251003	gene-LOC122877917/gene-LOC122865952	2	LOC122865952/LOC122877917	1	gene-LOC122877917	1
BP	GO:0002573	myeloid leukocyte differentiation	2/178	25/11595	0.0558193617608064	0.408154340251003	gene-zbtb46/gene-lrrc17	2	lrrc17/zbtb46	0	-	2
BP	GO:0006730	one-carbon metabolic process	2/178	25/11595	0.0558193617608064	0.408154340251003	gene-ahcyl1/gene-hspa1b	2	ahcyl1/hspa1b	1	gene-ahcyl1	1
BP	GO:0043542	endothelial cell migration	2/178	25/11595	0.0558193617608064	0.408154340251003	gene-LOC122877917/gene-snai2	2	LOC122877917/snai2	1	gene-LOC122877917	1
BP	GO:0045597	positive regulation of cell differentiation	4/178	94/11595	0.0565226754128432	0.410386467258038	gene-metrnlb/gene-zbtb46/gene-snai2/gene-LOC122868714	4	LOC122868714/metrnlb/snai2/zbtb46	1	gene-metrnlb	3
BP	GO:0035295	tube development	9/178	320/11595	0.0584097770966607	0.417112500852682	gene-skib/gene-LOC122877908/gene-amotl2a/gene-LOC122877917/gene-kdrl/gene-LOC122881975/gene-LOC122881976/gene-angptl4/gene-hspa12b	9	amotl2a/angptl4/hspa12b/kdrl/LOC122877908/LOC122877917/LOC122881975/LOC122881976/skib	5	gene-hspa12b/gene-LOC122877908/gene-LOC122877917/gene-LOC122881975/gene-LOC122881976	4
BP	GO:0007015	actin filament organization	6/178	180/11595	0.0590144759813119	0.417112500852682	gene-swap70a/gene-LOC122873669/gene-LOC122880325/gene-fmn2a/gene-LOC122861414/gene-LOC122867164	6	fmn2a/LOC122861414/LOC122867164/LOC122873669/LOC122880325/swap70a	2	gene-LOC122861414/gene-LOC122880325	4
BP	GO:0006873	cellular ion homeostasis	3/178	58/11595	0.0594250272585743	0.417112500852682	gene-swap70a/gene-LOC122881038/gene-LOC122881039	3	LOC122881038/LOC122881039/swap70a	0	-	3
BP	GO:0030003	cellular cation homeostasis	3/178	58/11595	0.0594250272585743	0.417112500852682	gene-swap70a/gene-LOC122881038/gene-LOC122881039	3	LOC122881038/LOC122881039/swap70a	0	-	3
BP	GO:0030522	intracellular receptor signaling pathway	2/178	26/11595	0.0598764792688623	0.417112500852682	gene-snai2/gene-LOC122865952	2	LOC122865952/snai2	0	-	2
BP	GO:0046916	cellular transition metal ion homeostasis	2/178	26/11595	0.0598764792688623	0.417112500852682	gene-LOC122881038/gene-LOC122881039	2	LOC122881038/LOC122881039	0	-	2
BP	GO:0051094	positive regulation of developmental process	5/178	139/11595	0.0629112314072902	0.435311943496082	gene-metrnlb/gene-LOC122877917/gene-zbtb46/gene-snai2/gene-LOC122868714	5	LOC122868714/LOC122877917/metrnlb/snai2/zbtb46	2	gene-LOC122877917/gene-metrnlb	3
BP	GO:0000122	negative regulation of transcription by RNA polymerase II	4/178	98/11595	0.0639386872157399	0.437196515579822	gene-LOC122877917/gene-snai2/gene-jazf1a/gene-LOC122865952	4	jazf1a/LOC122865952/LOC122877917/snai2	1	gene-LOC122877917	3
BP	GO:0022408	negative regulation of cell-cell adhesion	2/178	27/11595	0.0640316914185772	0.437196515579822	gene-swap70a/gene-LOC122877917	2	LOC122877917/swap70a	1	gene-LOC122877917	1
BP	GO:1902905	positive regulation of supramolecular fiber organization	3/178	60/11595	0.0644815751646596	0.437371736807658	gene-swap70a/gene-fmn2a/gene-LOC122861414	3	fmn2a/LOC122861414/swap70a	1	gene-LOC122861414	2
BP	GO:0051495	positive regulation of cytoskeleton organization	3/178	61/11595	0.0670820780619647	0.448393516316536	gene-swap70a/gene-fmn2a/gene-LOC122861414	3	fmn2a/LOC122861414/swap70a	1	gene-LOC122861414	2
BP	GO:0007416	synapse assembly	2/178	28/11595	0.0682810689250205	0.448393516316536	gene-nptx1l/gene-pclob	2	nptx1l/pclob	2	gene-nptx1l/gene-pclob	0
BP	GO:0031669	cellular response to nutrient levels	2/178	28/11595	0.0682810689250205	0.448393516316536	gene-snai2/gene-LOC122865952	2	LOC122865952/snai2	0	-	2
BP	GO:0042074	cell migration involved in gastrulation	2/178	28/11595	0.0682810689250205	0.448393516316536	gene-snai1a/gene-LOC122877612	2	LOC122877612/snai1a	0	-	2
BP	GO:0090101	negative regulation of transmembrane receptor protein serine/threonine kinase signaling pathway	2/178	28/11595	0.0682810689250205	0.448393516316536	gene-nog2/gene-LOC122871826	2	LOC122871826/nog2	0	-	2
BP	GO:0031668	cellular response to extracellular stimulus	2/178	29/11595	0.0726207788178672	0.465043620877149	gene-snai2/gene-LOC122865952	2	LOC122865952/snai2	0	-	2
BP	GO:0032103	positive regulation of response to external stimulus	2/178	29/11595	0.0726207788178672	0.465043620877149	gene-swap70a/gene-snai2	2	snai2/swap70a	0	-	2
BP	GO:0071496	cellular response to external stimulus	2/178	29/11595	0.0726207788178672	0.465043620877149	gene-snai2/gene-LOC122865952	2	LOC122865952/snai2	0	-	2
BP	GO:0099173	postsynapse organization	2/178	29/11595	0.0726207788178672	0.465043620877149	gene-nptx1l/gene-cnksr1	2	cnksr1/nptx1l	1	gene-nptx1l	1
BP	GO:0019725	cellular homeostasis	4/178	103/11595	0.073889834622456	0.470249503060199	gene-swap70a/gene-nptx1l/gene-LOC122881038/gene-LOC122881039	4	LOC122881038/LOC122881039/nptx1l/swap70a	1	gene-nptx1l	3
BP	GO:0001764	neuron migration	2/178	30/11595	0.0770470824377944	0.475661928103988	gene-reln/gene-ndnf	2	ndnf/reln	0	-	2
BP	GO:0010631	epithelial cell migration	2/178	30/11595	0.0770470824377944	0.475661928103988	gene-LOC122877917/gene-snai2	2	LOC122877917/snai2	1	gene-LOC122877917	1
BP	GO:0044843	cell cycle G1/S phase transition	2/178	30/11595	0.0770470824377944	0.475661928103988	gene-LOC122877917/gene-LOC122865952	2	LOC122865952/LOC122877917	1	gene-LOC122877917	1
BP	GO:0055072	iron ion homeostasis	2/178	30/11595	0.0770470824377944	0.475661928103988	gene-LOC122881038/gene-LOC122881039	2	LOC122881038/LOC122881039	0	-	2
BP	GO:0090630	activation of GTPase activity	2/178	30/11595	0.0770470824377944	0.475661928103988	gene-rundc1/gene-tbc1d30	2	rundc1/tbc1d30	2	gene-rundc1/gene-tbc1d30	0
BP	GO:0032870	cellular response to hormone stimulus	3/178	65/11595	0.0779514649840745	0.478380716658219	gene-LOC122864683/gene-LOC122865952/gene-wbp2	3	LOC122864683/LOC122865952/wbp2	2	gene-LOC122864683/gene-wbp2	1
BP	GO:0031589	cell-substrate adhesion	3/178	66/11595	0.0807824812874574	0.488863836097391	gene-lamb3/gene-parvb/gene-ndnf	3	lamb3/ndnf/parvb	2	gene-lamb3/gene-parvb	1
BP	GO:0022603	regulation of anatomical structure morphogenesis	5/178	150/11595	0.0812284136534781	0.488863836097391	gene-amotl2a/gene-LOC122877917/gene-snai2/gene-LOC122867164/gene-LOC122869492	5	amotl2a/LOC122867164/LOC122869492/LOC122877917/snai2	2	gene-LOC122869492/gene-LOC122877917	3
BP	GO:0001837	epithelial to mesenchymal transition	2/178	31/11595	0.0815563334711458	0.488863836097391	gene-snai1a/gene-snai2	2	snai1a/snai2	0	-	2
BP	GO:0060027	convergent extension involved in gastrulation	2/178	31/11595	0.0815563334711458	0.488863836097391	gene-LOC122877612/gene-LOC122871826	2	LOC122871826/LOC122877612	0	-	2
BP	GO:0030198	extracellular matrix organization	3/178	68/11595	0.0865762995009049	0.510058084488188	gene-lamb3/gene-ndnf/gene-LOC122865952	3	lamb3/LOC122865952/ndnf	1	gene-lamb3	2
BP	GO:0045229	external encapsulating structure organization	3/178	68/11595	0.0865762995009049	0.510058084488188	gene-lamb3/gene-ndnf/gene-LOC122865952	3	lamb3/LOC122865952/ndnf	1	gene-lamb3	2
BP	GO:0090287	regulation of cellular response to growth factor stimulus	3/178	68/11595	0.0865762995009049	0.510058084488188	gene-sfrp5/gene-nog2/gene-LOC122871826	3	LOC122871826/nog2/sfrp5	0	-	3
BP	GO:0043062	extracellular structure organization	3/178	69/11595	0.0895377383222467	0.524508001194525	gene-lamb3/gene-ndnf/gene-LOC122865952	3	lamb3/LOC122865952/ndnf	1	gene-lamb3	2
BP	GO:0030203	glycosaminoglycan metabolic process	2/178	33/11595	0.0908095427221661	0.525981115430074	gene-xylt1/gene-ndnf	2	ndnf/xylt1	0	-	2
BP	GO:0090132	epithelium migration	2/178	33/11595	0.0908095427221661	0.525981115430074	gene-LOC122877917/gene-snai2	2	LOC122877917/snai2	1	gene-LOC122877917	1
BP	GO:0055065	metal ion homeostasis	3/178	70/11595	0.0925412723856781	0.533017049327565	gene-swap70a/gene-LOC122881038/gene-LOC122881039	3	LOC122881038/LOC122881039/swap70a	0	-	3
BP	GO:1901700	response to oxygen-containing compound	6/178	204/11595	0.0943601598985924	0.540474026974715	gene-LOC122864683/gene-nptx1l/gene-LOC122877917/gene-snai2/gene-LOC122865952/gene-LOC122868820	6	LOC122864683/LOC122865952/LOC122868820/LOC122877917/nptx1l/snai2	3	gene-LOC122864683/gene-LOC122877917/gene-nptx1l	3
BP	GO:0006022	aminoglycan metabolic process	2/178	34/11595	0.0955466528748281	0.541256039087625	gene-xylt1/gene-ndnf	2	ndnf/xylt1	0	-	2
BP	GO:0009266	response to temperature stimulus	2/178	34/11595	0.0955466528748281	0.541256039087625	gene-metrnlb/gene-LOC122868714	2	LOC122868714/metrnlb	1	gene-metrnlb	1
BP	GO:0000902	cell morphogenesis	7/178	254/11595	0.0965233188961861	0.543441798654036	gene-lamb3/gene-nptx1l/gene-amotl2a/gene-LOC122888546/gene-cap2/gene-LOC122867164/gene-LOC122869492	7	amotl2a/cap2/lamb3/LOC122867164/LOC122869492/LOC122888546/nptx1l	3	gene-lamb3/gene-LOC122869492/gene-nptx1l	4
BP	GO:0033993	response to lipid	4/178	114/11595	0.0983439143868775	0.543441798654036	gene-LOC122877917/gene-snai2/gene-LOC122865952/gene-LOC122868820	4	LOC122865952/LOC122868820/LOC122877917/snai2	1	gene-LOC122877917	3
BP	GO:0060429	epithelium development	8/178	306/11595	0.0992910367545489	0.543441798654036	gene-skib/gene-LOC122877612/gene-amotl2a/gene-LOC122877917/gene-snai2/gene-LOC122865952/gene-dcn/gene-LOC122871826	8	amotl2a/dcn/LOC122865952/LOC122871826/LOC122877612/LOC122877917/skib/snai2	2	gene-dcn/gene-LOC122877917	6
BP	GO:0090130	tissue migration	2/178	35/11595	0.100353010637195	0.543441798654036	gene-LOC122877917/gene-snai2	2	LOC122877917/snai2	1	gene-LOC122877917	1
BP	GO:1901991	negative regulation of mitotic cell cycle phase transition	2/178	35/11595	0.100353010637195	0.543441798654036	gene-LOC122877917/gene-LOC122865952	2	LOC122865952/LOC122877917	1	gene-LOC122877917	1
BP	GO:0043547	positive regulation of GTPase activity	6/178	210/11595	0.104658480319019	0.543441798654036	gene-si:dkey-91m11.5/gene-arhgap25/gene-rasgrp3/gene-arhgap24/gene-rundc1/gene-tbc1d30	6	arhgap24/arhgap25/rasgrp3/rundc1/si:dkey-91m11.5/tbc1d30	4	gene-arhgap25/gene-rasgrp3/gene-rundc1/gene-tbc1d30	2
BP	GO:0007219	Notch signaling pathway	3/178	74/11595	0.104962165101118	0.543441798654036	gene-LOC122873030/gene-snai2/gene-id2a	3	id2a/LOC122873030/snai2	0	-	3
BP	GO:1901988	negative regulation of cell cycle phase transition	2/178	36/11595	0.105225403235499	0.543441798654036	gene-LOC122877917/gene-LOC122865952	2	LOC122865952/LOC122877917	1	gene-LOC122877917	1
BP	GO:1902105	regulation of leukocyte differentiation	2/178	36/11595	0.105225403235499	0.543441798654036	gene-zbtb46/gene-lrrc17	2	lrrc17/zbtb46	0	-	2
BP	GO:0043085	positive regulation of catalytic activity	8/178	311/11595	0.10636635903719	0.543441798654036	gene-dok7b/gene-si:dkey-91m11.5/gene-arhgap25/gene-LOC122877917/gene-rasgrp3/gene-arhgap24/gene-rundc1/gene-tbc1d30	8	arhgap24/arhgap25/dok7b/LOC122877917/rasgrp3/rundc1/si:dkey-91m11.5/tbc1d30	5	gene-arhgap25/gene-LOC122877917/gene-rasgrp3/gene-rundc1/gene-tbc1d30	3
BP	GO:0030036	actin cytoskeleton organization	8/178	312/11595	0.107814345026216	0.543441798654036	gene-swap70a/gene-LOC122873669/gene-parvb/gene-amotl2a/gene-LOC122880325/gene-fmn2a/gene-LOC122861414/gene-LOC122867164	8	amotl2a/fmn2a/LOC122861414/LOC122867164/LOC122873669/LOC122880325/parvb/swap70a	3	gene-LOC122861414/gene-LOC122880325/gene-parvb	5
BP	GO:0008016	regulation of heart contraction	2/178	37/11595	0.110160699215314	0.543441798654036	gene-parvb/gene-pdzph1	2	parvb/pdzph1	2	gene-parvb/gene-pdzph1	0
BP	GO:0046530	photoreceptor cell differentiation	2/178	37/11595	0.110160699215314	0.543441798654036	gene-id2a/gene-rpgrb	2	id2a/rpgrb	0	-	2
BP	GO:0006955	immune response	9/178	368/11595	0.113635428437344	0.543441798654036	gene-swap70a/gene-LOC122873767/gene-prf1.5/gene-LOC122876711/gene-ptx3a/gene-il15l/gene-LOC122884604/gene-LOC122888056/gene-irf1b	9	il15l/irf1b/LOC122873767/LOC122876711/LOC122884604/LOC122888056/prf1.5/ptx3a/swap70a	7	gene-irf1b/gene-LOC122873767/gene-LOC122876711/gene-LOC122884604/gene-LOC122888056/gene-prf1.5/gene-ptx3a	2
BP	GO:0014070	response to organic cyclic compound	3/178	77/11595	0.114684633758258	0.543441798654036	gene-LOC122877917/gene-snai2/gene-LOC122865952	3	LOC122865952/LOC122877917/snai2	1	gene-LOC122877917	2
BP	GO:0030029	actin filament-based process	8/178	317/11595	0.115217434297576	0.543441798654036	gene-swap70a/gene-LOC122873669/gene-parvb/gene-amotl2a/gene-LOC122880325/gene-fmn2a/gene-LOC122861414/gene-LOC122867164	8	amotl2a/fmn2a/LOC122861414/LOC122867164/LOC122873669/LOC122880325/parvb/swap70a	3	gene-LOC122861414/gene-LOC122880325/gene-parvb	5
BP	GO:0009607	response to biotic stimulus	7/178	267/11595	0.117169679173207	0.543441798654036	gene-LOC122877917/gene-ptx3a/gene-LOC122881038/gene-LOC122881039/gene-wdfy4/gene-nfkbiaa/gene-LOC122868820	7	LOC122868820/LOC122877917/LOC122881038/LOC122881039/nfkbiaa/ptx3a/wdfy4	4	gene-LOC122877917/gene-nfkbiaa/gene-ptx3a/gene-wdfy4	3
BP	GO:0055076	transition metal ion homeostasis	2/178	39/11595	0.120207871834413	0.543441798654036	gene-LOC122881038/gene-LOC122881039	2	LOC122881038/LOC122881039	0	-	2
BP	GO:1901607	alpha-amino acid biosynthetic process	2/178	39/11595	0.120207871834413	0.543441798654036	gene-LOC122876938/gene-psat1	2	LOC122876938/psat1	2	gene-LOC122876938/gene-psat1	0
BP	GO:0008154	actin polymerization or depolymerization	4/178	124/11595	0.123422535979974	0.543441798654036	gene-swap70a/gene-fmn2a/gene-LOC122861414/gene-LOC122867164	4	fmn2a/LOC122861414/LOC122867164/swap70a	1	gene-LOC122861414	3
BP	GO:0007346	regulation of mitotic cell cycle	3/178	80/11595	0.124733616565711	0.543441798654036	gene-LOC122877917/gene-id2a/gene-LOC122865952	3	id2a/LOC122865952/LOC122877917	1	gene-LOC122877917	2
BP	GO:0002682	regulation of immune system process	6/178	221/11595	0.124989998348567	0.543441798654036	gene-swap70a/gene-LOC122881975/gene-LOC122881976/gene-zbtb46/gene-irf1b/gene-lrrc17	6	irf1b/LOC122881975/LOC122881976/lrrc17/swap70a/zbtb46	3	gene-irf1b/gene-LOC122881975/gene-LOC122881976	3
BP	GO:0002040	sprouting angiogenesis	2/178	40/11595	0.12531387688054	0.543441798654036	gene-LOC122877917/gene-hspa12b	2	hspa12b/LOC122877917	2	gene-hspa12b/gene-LOC122877917	0
BP	GO:0006694	steroid biosynthetic process	2/178	40/11595	0.12531387688054	0.543441798654036	gene-snai2/gene-LOC122871599	2	LOC122871599/snai2	1	gene-LOC122871599	1
BP	GO:0031331	positive regulation of cellular catabolic process	2/178	40/11595	0.12531387688054	0.543441798654036	gene-LOC122886528/gene-dcn	2	dcn/LOC122886528	2	gene-dcn/gene-LOC122886528	0
BP	GO:0045010	actin nucleation	2/178	40/11595	0.12531387688054	0.543441798654036	gene-fmn2a/gene-LOC122861414	2	fmn2a/LOC122861414	1	gene-LOC122861414	1
BP	GO:0050808	synapse organization	3/178	81/11595	0.128152339169289	0.543441798654036	gene-nptx1l/gene-pclob/gene-cnksr1	3	cnksr1/nptx1l/pclob	2	gene-nptx1l/gene-pclob	1
BP	GO:0022008	neurogenesis	10/178	432/11595	0.128463772376625	0.543441798654036	gene-nav2a/gene-nptx1l/gene-reln/gene-ndnf/gene-LOC122877917/gene-LOC122888546/gene-id2a/gene-ndrg1a/gene-LOC122867164/gene-rpgrb	10	id2a/LOC122867164/LOC122877917/LOC122888546/nav2a/ndnf/ndrg1a/nptx1l/reln/rpgrb	3	gene-LOC122877917/gene-ndrg1a/gene-nptx1l	7
BP	GO:0002244	hematopoietic progenitor cell differentiation	2/178	41/11595	0.130471038852371	0.543441798654036	gene-tgfb3/gene-nfkbiaa	2	nfkbiaa/tgfb3	1	gene-nfkbiaa	1
BP	GO:0043087	regulation of GTPase activity	6/178	227/11595	0.136840098693179	0.543441798654036	gene-si:dkey-91m11.5/gene-arhgap25/gene-rasgrp3/gene-arhgap24/gene-rundc1/gene-tbc1d30	6	arhgap24/arhgap25/rasgrp3/rundc1/si:dkey-91m11.5/tbc1d30	4	gene-arhgap25/gene-rasgrp3/gene-rundc1/gene-tbc1d30	2
BP	GO:0051345	positive regulation of hydrolase activity	6/178	229/11595	0.140904649907235	0.543441798654036	gene-si:dkey-91m11.5/gene-arhgap25/gene-rasgrp3/gene-arhgap24/gene-rundc1/gene-tbc1d30	6	arhgap24/arhgap25/rasgrp3/rundc1/si:dkey-91m11.5/tbc1d30	4	gene-arhgap25/gene-rasgrp3/gene-rundc1/gene-tbc1d30	2
BP	GO:0006665	sphingolipid metabolic process	2/178	43/11595	0.140927905285733	0.543441798654036	gene-smpdl3b/gene-LOC122883333	2	LOC122883333/smpdl3b	1	gene-LOC122883333	1
BP	GO:0008652	cellular amino acid biosynthetic process	2/178	43/11595	0.140927905285733	0.543441798654036	gene-LOC122876938/gene-psat1	2	LOC122876938/psat1	2	gene-LOC122876938/gene-psat1	0
BP	GO:0009615	response to virus	2/178	43/11595	0.140927905285733	0.543441798654036	gene-wdfy4/gene-nfkbiaa	2	nfkbiaa/wdfy4	2	gene-nfkbiaa/gene-wdfy4	0
BP	GO:0009896	positive regulation of catabolic process	2/178	43/11595	0.140927905285733	0.543441798654036	gene-LOC122886528/gene-dcn	2	dcn/LOC122886528	2	gene-dcn/gene-LOC122886528	0
BP	GO:0045321	leukocyte activation	4/178	131/11595	0.142437007316035	0.543441798654036	gene-swap70a/gene-LOC122873767/gene-wdfy4/gene-ndrg1a	4	LOC122873767/ndrg1a/swap70a/wdfy4	3	gene-LOC122873767/gene-ndrg1a/gene-wdfy4	1
BP	GO:0001935	endothelial cell proliferation	1/178	10/11595	0.143383987629885	0.543441798654036	gene-amotl2a	1	amotl2a	0	-	1
BP	GO:0002688	regulation of leukocyte chemotaxis	1/178	10/11595	0.143383987629885	0.543441798654036	gene-swap70a	1	swap70a	0	-	1
BP	GO:0007606	sensory perception of chemical stimulus	1/178	10/11595	0.143383987629885	0.543441798654036	gene-LOC122863926	1	LOC122863926	1	gene-LOC122863926	0
BP	GO:0007611	learning or memory	1/178	10/11595	0.143383987629885	0.543441798654036	gene-tafa3a	1	tafa3a	1	gene-tafa3a	0
BP	GO:0007612	learning	1/178	10/11595	0.143383987629885	0.543441798654036	gene-tafa3a	1	tafa3a	1	gene-tafa3a	0
BP	GO:0009086	methionine biosynthetic process	1/178	10/11595	0.143383987629885	0.543441798654036	gene-LOC122876938	1	LOC122876938	1	gene-LOC122876938	0
BP	GO:0009214	cyclic nucleotide catabolic process	1/178	10/11595	0.143383987629885	0.543441798654036	gene-pde4ba	1	pde4ba	0	-	1
BP	GO:0019827	stem cell population maintenance	1/178	10/11595	0.143383987629885	0.543441798654036	gene-LOC122877917	1	LOC122877917	1	gene-LOC122877917	0
BP	GO:0021884	forebrain neuron development	1/178	10/11595	0.143383987629885	0.543441798654036	gene-ndnf	1	ndnf	0	-	1
BP	GO:0022612	gland morphogenesis	1/178	10/11595	0.143383987629885	0.543441798654036	gene-snai2	1	snai2	0	-	1
BP	GO:0030278	regulation of ossification	1/178	10/11595	0.143383987629885	0.543441798654036	gene-tgfb3	1	tgfb3	0	-	1
BP	GO:0030851	granulocyte differentiation	1/178	10/11595	0.143383987629885	0.543441798654036	gene-zbtb46	1	zbtb46	0	-	1
BP	GO:0032098	regulation of appetite	1/178	10/11595	0.143383987629885	0.543441798654036	gene-htr4	1	htr4	0	-	1
BP	GO:0042542	response to hydrogen peroxide	1/178	10/11595	0.143383987629885	0.543441798654036	gene-LOC122877917	1	LOC122877917	1	gene-LOC122877917	0
BP	GO:0051099	positive regulation of binding	1/178	10/11595	0.143383987629885	0.543441798654036	gene-LOC122877917	1	LOC122877917	1	gene-LOC122877917	0
BP	GO:0070849	response to epidermal growth factor	1/178	10/11595	0.143383987629885	0.543441798654036	gene-snai2	1	snai2	0	-	1
BP	GO:0071322	cellular response to carbohydrate stimulus	1/178	10/11595	0.143383987629885	0.543441798654036	gene-nptx1l	1	nptx1l	1	gene-nptx1l	0
BP	GO:0071326	cellular response to monosaccharide stimulus	1/178	10/11595	0.143383987629885	0.543441798654036	gene-nptx1l	1	nptx1l	1	gene-nptx1l	0
BP	GO:0071331	cellular response to hexose stimulus	1/178	10/11595	0.143383987629885	0.543441798654036	gene-nptx1l	1	nptx1l	1	gene-nptx1l	0
BP	GO:0071333	cellular response to glucose stimulus	1/178	10/11595	0.143383987629885	0.543441798654036	gene-nptx1l	1	nptx1l	1	gene-nptx1l	0
BP	GO:0071364	cellular response to epidermal growth factor stimulus	1/178	10/11595	0.143383987629885	0.543441798654036	gene-snai2	1	snai2	0	-	1
BP	GO:0071621	granulocyte chemotaxis	1/178	10/11595	0.143383987629885	0.543441798654036	gene-LOC122873767	1	LOC122873767	1	gene-LOC122873767	0
BP	GO:0097205	renal filtration	1/178	10/11595	0.143383987629885	0.543441798654036	gene-ctns	1	ctns	1	gene-ctns	0
BP	GO:0097305	response to alcohol	1/178	10/11595	0.143383987629885	0.543441798654036	gene-LOC122877917	1	LOC122877917	1	gene-LOC122877917	0
BP	GO:0098727	maintenance of cell number	1/178	10/11595	0.143383987629885	0.543441798654036	gene-LOC122877917	1	LOC122877917	1	gene-LOC122877917	0
BP	GO:1901985	positive regulation of protein acetylation	1/178	10/11595	0.143383987629885	0.543441798654036	gene-snai2	1	snai2	0	-	1
BP	GO:1990266	neutrophil migration	1/178	10/11595	0.143383987629885	0.543441798654036	gene-LOC122873767	1	LOC122873767	1	gene-LOC122873767	0
BP	GO:2000758	positive regulation of peptidyl-lysine acetylation	1/178	10/11595	0.143383987629885	0.543441798654036	gene-snai2	1	snai2	0	-	1
BP	GO:2001243	negative regulation of intrinsic apoptotic signaling pathway	1/178	10/11595	0.143383987629885	0.543441798654036	gene-snai2	1	snai2	0	-	1
BP	GO:0010035	response to inorganic substance	2/178	44/11595	0.146222322842293	0.543441798654036	gene-nptx1l/gene-LOC122877917	2	LOC122877917/nptx1l	2	gene-LOC122877917/gene-nptx1l	0
BP	GO:0022407	regulation of cell-cell adhesion	2/178	44/11595	0.146222322842293	0.543441798654036	gene-swap70a/gene-LOC122877917	2	LOC122877917/swap70a	1	gene-LOC122877917	1
BP	GO:0046434	organophosphate catabolic process	2/178	44/11595	0.146222322842293	0.543441798654036	gene-pde4ba/gene-smpdl3b	2	pde4ba/smpdl3b	0	-	2
BP	GO:1901653	cellular response to peptide	2/178	44/11595	0.146222322842293	0.543441798654036	gene-LOC122864683/gene-LOC122877917	2	LOC122864683/LOC122877917	2	gene-LOC122864683/gene-LOC122877917	0
BP	GO:0048598	embryonic morphogenesis	6/178	232/11595	0.147105985019717	0.543441798654036	gene-skib/gene-snai1a/gene-LOC122877612/gene-LOC122877917/gene-pthlha/gene-LOC122871826	6	LOC122871826/LOC122877612/LOC122877917/pthlha/skib/snai1a	1	gene-LOC122877917	5
BP	GO:0051336	regulation of hydrolase activity	7/178	284/11595	0.147347462442389	0.543441798654036	gene-si:dkey-91m11.5/gene-arhgap25/gene-LOC122877917/gene-rasgrp3/gene-arhgap24/gene-rundc1/gene-tbc1d30	7	arhgap24/arhgap25/LOC122877917/rasgrp3/rundc1/si:dkey-91m11.5/tbc1d30	5	gene-arhgap25/gene-LOC122877917/gene-rasgrp3/gene-rundc1/gene-tbc1d30	2
BP	GO:0009628	response to abiotic stimulus	5/178	183/11595	0.150820529838265	0.543441798654036	gene-tafa3a/gene-metrnlb/gene-gpr4/gene-snai2/gene-LOC122868714	5	gpr4/LOC122868714/metrnlb/snai2/tafa3a	2	gene-metrnlb/gene-tafa3a	3
BP	GO:0001701	in utero embryonic development	2/178	45/11595	0.151557320490856	0.543441798654036	gene-LOC122877917/gene-rundc1	2	LOC122877917/rundc1	2	gene-LOC122877917/gene-rundc1	0
BP	GO:0009063	cellular amino acid catabolic process	2/178	45/11595	0.151557320490856	0.543441798654036	gene-ddah1/gene-enosf1	2	ddah1/enosf1	1	gene-enosf1	1
BP	GO:0010948	negative regulation of cell cycle process	2/178	45/11595	0.151557320490856	0.543441798654036	gene-LOC122877917/gene-LOC122865952	2	LOC122865952/LOC122877917	1	gene-LOC122877917	1
BP	GO:1903706	regulation of hemopoiesis	2/178	45/11595	0.151557320490856	0.543441798654036	gene-zbtb46/gene-lrrc17	2	lrrc17/zbtb46	0	-	2
BP	GO:0002062	chondrocyte differentiation	1/178	11/11595	0.156545632015027	0.543441798654036	gene-snai2	1	snai2	0	-	1
BP	GO:0006555	methionine metabolic process	1/178	11/11595	0.156545632015027	0.543441798654036	gene-LOC122876938	1	LOC122876938	1	gene-LOC122876938	0
BP	GO:0006858	extracellular transport	1/178	11/11595	0.156545632015027	0.543441798654036	gene-rpgrb	1	rpgrb	0	-	1
BP	GO:0007204	positive regulation of cytosolic calcium ion concentration	1/178	11/11595	0.156545632015027	0.543441798654036	gene-swap70a	1	swap70a	0	-	1
BP	GO:0009395	phospholipid catabolic process	1/178	11/11595	0.156545632015027	0.543441798654036	gene-smpdl3b	1	smpdl3b	0	-	1
BP	GO:0016540	protein autoprocessing	1/178	11/11595	0.156545632015027	0.543441798654036	gene-LOC122871823	1	LOC122871823	0	-	1
BP	GO:0018209	peptidyl-serine modification	1/178	11/11595	0.156545632015027	0.543441798654036	gene-ndnf	1	ndnf	0	-	1
BP	GO:0021761	limbic system development	1/178	11/11595	0.156545632015027	0.543441798654036	gene-ndnf	1	ndnf	0	-	1
BP	GO:0030514	negative regulation of BMP signaling pathway	1/178	11/11595	0.156545632015027	0.543441798654036	gene-nog2	1	nog2	0	-	1
BP	GO:0032261	purine nucleotide salvage	1/178	11/11595	0.156545632015027	0.543441798654036	gene-ampd3a	1	ampd3a	0	-	1
BP	GO:0043627	response to estrogen	1/178	11/11595	0.156545632015027	0.543441798654036	gene-wbp2	1	wbp2	1	gene-wbp2	0
BP	GO:0048659	smooth muscle cell proliferation	1/178	11/11595	0.156545632015027	0.543441798654036	gene-LOC122877917	1	LOC122877917	1	gene-LOC122877917	0
BP	GO:0048660	regulation of smooth muscle cell proliferation	1/178	11/11595	0.156545632015027	0.543441798654036	gene-LOC122877917	1	LOC122877917	1	gene-LOC122877917	0
BP	GO:0051101	regulation of DNA binding	1/178	11/11595	0.156545632015027	0.543441798654036	gene-LOC122877917	1	LOC122877917	1	gene-LOC122877917	0
BP	GO:0051480	regulation of cytosolic calcium ion concentration	1/178	11/11595	0.156545632015027	0.543441798654036	gene-swap70a	1	swap70a	0	-	1
BP	GO:0062237	protein localization to postsynapse	1/178	11/11595	0.156545632015027	0.543441798654036	gene-nptx1l	1	nptx1l	1	gene-nptx1l	0
BP	GO:0070831	basement membrane assembly	1/178	11/11595	0.156545632015027	0.543441798654036	gene-lamb3	1	lamb3	1	gene-lamb3	0
BP	GO:0072015	glomerular visceral epithelial cell development	1/178	11/11595	0.156545632015027	0.543441798654036	gene-LOC122865952	1	LOC122865952	0	-	1
BP	GO:0072310	glomerular epithelial cell development	1/178	11/11595	0.156545632015027	0.543441798654036	gene-LOC122865952	1	LOC122865952	0	-	1
BP	GO:0072384	organelle transport along microtubule	1/178	11/11595	0.156545632015027	0.543441798654036	gene-LOC122886528	1	LOC122886528	1	gene-LOC122886528	0
BP	GO:0097352	autophagosome maturation	1/178	11/11595	0.156545632015027	0.543441798654036	gene-LOC122886528	1	LOC122886528	1	gene-LOC122886528	0
BP	GO:0097530	granulocyte migration	1/178	11/11595	0.156545632015027	0.543441798654036	gene-LOC122873767	1	LOC122873767	1	gene-LOC122873767	0
BP	GO:0099072	regulation of postsynaptic membrane neurotransmitter receptor levels	1/178	11/11595	0.156545632015027	0.543441798654036	gene-nptx1l	1	nptx1l	1	gene-nptx1l	0
BP	GO:1903539	protein localization to postsynaptic membrane	1/178	11/11595	0.156545632015027	0.543441798654036	gene-nptx1l	1	nptx1l	1	gene-nptx1l	0
BP	GO:0055080	cation homeostasis	3/178	89/11595	0.156636357179039	0.543441798654036	gene-swap70a/gene-LOC122881038/gene-LOC122881039	3	LOC122881038/LOC122881039/swap70a	0	-	3
BP	GO:0098771	inorganic ion homeostasis	3/178	89/11595	0.156636357179039	0.543441798654036	gene-swap70a/gene-LOC122881038/gene-LOC122881039	3	LOC122881038/LOC122881039/swap70a	0	-	3
BP	GO:0060828	regulation of canonical Wnt signaling pathway	2/178	46/11595	0.156930425265481	0.543441798654036	gene-tmem198a/gene-snai2	2	snai2/tmem198a	1	gene-tmem198a	1
BP	GO:0099111	microtubule-based transport	2/178	46/11595	0.156930425265481	0.543441798654036	gene-LOC122886528/gene-rpgrb	2	LOC122886528/rpgrb	1	gene-LOC122886528	1
BP	GO:1901990	regulation of mitotic cell cycle phase transition	2/178	46/11595	0.156930425265481	0.543441798654036	gene-LOC122877917/gene-LOC122865952	2	LOC122865952/LOC122877917	1	gene-LOC122877917	1
BP	GO:0045892	negative regulation of transcription, DNA-templated	5/178	186/11595	0.158124011428548	0.543441798654036	gene-LOC122877917/gene-snai2/gene-id2a/gene-jazf1a/gene-LOC122865952	5	id2a/jazf1a/LOC122865952/LOC122877917/snai2	1	gene-LOC122877917	4
BP	GO:2000026	regulation of multicellular organismal development	5/178	187/11595	0.160590524828023	0.543441798654036	gene-LOC122877917/gene-zbtb46/gene-snai2/gene-tgfb3/gene-lrrc17	5	LOC122877917/lrrc17/snai2/tgfb3/zbtb46	1	gene-LOC122877917	4
BP	GO:0044093	positive regulation of molecular function	8/178	345/11595	0.161506050762649	0.543441798654036	gene-dok7b/gene-si:dkey-91m11.5/gene-arhgap25/gene-LOC122877917/gene-rasgrp3/gene-arhgap24/gene-rundc1/gene-tbc1d30	8	arhgap24/arhgap25/dok7b/LOC122877917/rasgrp3/rundc1/si:dkey-91m11.5/tbc1d30	5	gene-arhgap25/gene-LOC122877917/gene-rasgrp3/gene-rundc1/gene-tbc1d30	3
BP	GO:0042742	defense response to bacterium	2/178	47/11595	0.162339229775122	0.543441798654036	gene-LOC122881038/gene-LOC122881039	2	LOC122881038/LOC122881039	0	-	2
BP	GO:1902679	negative regulation of RNA biosynthetic process	5/178	188/11595	0.163072729337015	0.543441798654036	gene-LOC122877917/gene-snai2/gene-id2a/gene-jazf1a/gene-LOC122865952	5	id2a/jazf1a/LOC122865952/LOC122877917/snai2	1	gene-LOC122877917	4
BP	GO:1903507	negative regulation of nucleic acid-templated transcription	5/178	188/11595	0.163072729337015	0.543441798654036	gene-LOC122877917/gene-snai2/gene-id2a/gene-jazf1a/gene-LOC122865952	5	id2a/jazf1a/LOC122865952/LOC122877917/snai2	1	gene-LOC122877917	4
BP	GO:0030838	positive regulation of actin filament polymerization	2/178	48/11595	0.167781390792146	0.543441798654036	gene-fmn2a/gene-LOC122861414	2	fmn2a/LOC122861414	1	gene-LOC122861414	1
BP	GO:1901652	response to peptide	2/178	48/11595	0.167781390792146	0.543441798654036	gene-LOC122864683/gene-LOC122877917	2	LOC122864683/LOC122877917	2	gene-LOC122864683/gene-LOC122877917	0
BP	GO:0001763	morphogenesis of a branching structure	1/178	12/11595	0.16950617047336	0.543441798654036	gene-snai2	1	snai2	0	-	1
BP	GO:0006024	glycosaminoglycan biosynthetic process	1/178	12/11595	0.16950617047336	0.543441798654036	gene-xylt1	1	xylt1	0	-	1
BP	GO:0009070	serine family amino acid biosynthetic process	1/178	12/11595	0.16950617047336	0.543441798654036	gene-psat1	1	psat1	1	gene-psat1	0
BP	GO:0009791	post-embryonic development	1/178	12/11595	0.16950617047336	0.543441798654036	gene-LOC122877917	1	LOC122877917	1	gene-LOC122877917	0
BP	GO:0016241	regulation of macroautophagy	1/178	12/11595	0.16950617047336	0.543441798654036	gene-LOC122886528	1	LOC122886528	1	gene-LOC122886528	0
BP	GO:0031644	regulation of nervous system process	1/178	12/11595	0.16950617047336	0.543441798654036	gene-nptx1l	1	nptx1l	1	gene-nptx1l	0
BP	GO:0043500	muscle adaptation	1/178	12/11595	0.16950617047336	0.543441798654036	gene-LOC122877917	1	LOC122877917	1	gene-LOC122877917	0
BP	GO:0043524	negative regulation of neuron apoptotic process	1/178	12/11595	0.16950617047336	0.543441798654036	gene-ndnf	1	ndnf	0	-	1
BP	GO:0046847	filopodium assembly	1/178	12/11595	0.16950617047336	0.543441798654036	gene-amotl2a	1	amotl2a	0	-	1
BP	GO:0050730	regulation of peptidyl-tyrosine phosphorylation	1/178	12/11595	0.16950617047336	0.543441798654036	gene-dok7b	1	dok7b	0	-	1
BP	GO:0071711	basement membrane organization	1/178	12/11595	0.16950617047336	0.543441798654036	gene-lamb3	1	lamb3	1	gene-lamb3	0
BP	GO:0072523	purine-containing compound catabolic process	1/178	12/11595	0.16950617047336	0.543441798654036	gene-pde4ba	1	pde4ba	0	-	1
BP	GO:1901796	regulation of signal transduction by p53 class mediator	1/178	12/11595	0.16950617047336	0.543441798654036	gene-snai2	1	snai2	0	-	1
BP	GO:1905269	positive regulation of chromatin organization	1/178	12/11595	0.16950617047336	0.543441798654036	gene-snai2	1	snai2	0	-	1
BP	GO:2001021	negative regulation of response to DNA damage stimulus	1/178	12/11595	0.16950617047336	0.543441798654036	gene-snai2	1	snai2	0	-	1
BP	GO:0009725	response to hormone	3/178	93/11595	0.171555862247472	0.543441798654036	gene-LOC122864683/gene-LOC122865952/gene-wbp2	3	LOC122864683/LOC122865952/wbp2	2	gene-LOC122864683/gene-wbp2	1
BP	GO:0031329	regulation of cellular catabolic process	3/178	93/11595	0.171555862247472	0.543441798654036	gene-ctns/gene-LOC122886528/gene-dcn	3	ctns/dcn/LOC122886528	3	gene-ctns/gene-dcn/gene-LOC122886528	0
BP	GO:0050801	ion homeostasis	3/178	93/11595	0.171555862247472	0.543441798654036	gene-swap70a/gene-LOC122881038/gene-LOC122881039	3	LOC122881038/LOC122881039/swap70a	0	-	3
BP	GO:0007389	pattern specification process	5/178	192/11595	0.173154553771694	0.543441798654036	gene-skib/gene-snai1a/gene-amotl2a/gene-rpgrb/gene-LOC122871826	5	amotl2a/LOC122871826/rpgrb/skib/snai1a	0	-	5
BP	GO:0051253	negative regulation of RNA metabolic process	5/178	193/11595	0.175712270738686	0.543441798654036	gene-LOC122877917/gene-snai2/gene-id2a/gene-jazf1a/gene-LOC122865952	5	id2a/jazf1a/LOC122865952/LOC122877917/snai2	1	gene-LOC122877917	4
BP	GO:0009953	dorsal/ventral pattern formation	2/178	50/11595	0.178756721977864	0.543441798654036	gene-skib/gene-snai1a	2	skib/snai1a	0	-	2
BP	GO:0007368	determination of left/right symmetry	3/178	95/11595	0.179163950967087	0.543441798654036	gene-skib/gene-rpgrb/gene-LOC122871826	3	LOC122871826/rpgrb/skib	0	-	3
BP	GO:0045786	negative regulation of cell cycle	3/178	95/11595	0.179163950967087	0.543441798654036	gene-LOC122877917/gene-id2a/gene-LOC122865952	3	id2a/LOC122865952/LOC122877917	1	gene-LOC122877917	2
BP	GO:0000097	sulfur amino acid biosynthetic process	1/178	13/11595	0.182268658745461	0.543441798654036	gene-LOC122876938	1	LOC122876938	1	gene-LOC122876938	0
BP	GO:0001649	osteoblast differentiation	1/178	13/11595	0.182268658745461	0.543441798654036	gene-snai2	1	snai2	0	-	1
BP	GO:0003014	renal system process	1/178	13/11595	0.182268658745461	0.543441798654036	gene-ctns	1	ctns	1	gene-ctns	0
BP	GO:0003401	axis elongation	1/178	13/11595	0.182268658745461	0.543441798654036	gene-dcn	1	dcn	1	gene-dcn	0
BP	GO:0006023	aminoglycan biosynthetic process	1/178	13/11595	0.182268658745461	0.543441798654036	gene-xylt1	1	xylt1	0	-	1
BP	GO:0006188	IMP biosynthetic process	1/178	13/11595	0.182268658745461	0.543441798654036	gene-ampd3a	1	ampd3a	0	-	1
BP	GO:0009067	aspartate family amino acid biosynthetic process	1/178	13/11595	0.182268658745461	0.543441798654036	gene-LOC122876938	1	LOC122876938	1	gene-LOC122876938	0
BP	GO:0010842	retina layer formation	1/178	13/11595	0.182268658745461	0.543441798654036	gene-rpgrb	1	rpgrb	0	-	1
BP	GO:0030512	negative regulation of transforming growth factor beta receptor signaling pathway	1/178	13/11595	0.182268658745461	0.543441798654036	gene-LOC122871826	1	LOC122871826	0	-	1
BP	GO:0033002	muscle cell proliferation	1/178	13/11595	0.182268658745461	0.543441798654036	gene-LOC122877917	1	LOC122877917	1	gene-LOC122877917	0
BP	GO:0040029	regulation of gene expression, epigenetic	1/178	13/11595	0.182268658745461	0.543441798654036	gene-wbp2	1	wbp2	1	gene-wbp2	0
BP	GO:0042462	eye photoreceptor cell development	1/178	13/11595	0.182268658745461	0.543441798654036	gene-rpgrb	1	rpgrb	0	-	1
BP	GO:0043243	positive regulation of protein-containing complex disassembly	1/178	13/11595	0.182268658745461	0.543441798654036	gene-LOC122886528	1	LOC122886528	1	gene-LOC122886528	0
BP	GO:0043281	regulation of cysteine-type endopeptidase activity involved in apoptotic process	1/178	13/11595	0.182268658745461	0.543441798654036	gene-LOC122877917	1	LOC122877917	1	gene-LOC122877917	0
BP	GO:0045861	negative regulation of proteolysis	1/178	13/11595	0.182268658745461	0.543441798654036	gene-LOC122877917	1	LOC122877917	1	gene-LOC122877917	0
BP	GO:0046040	IMP metabolic process	1/178	13/11595	0.182268658745461	0.543441798654036	gene-ampd3a	1	ampd3a	0	-	1
BP	GO:0048268	clathrin coat assembly	1/178	13/11595	0.182268658745461	0.543441798654036	gene-LOC122888042	1	LOC122888042	1	gene-LOC122888042	0
BP	GO:0072089	stem cell proliferation	1/178	13/11595	0.182268658745461	0.543441798654036	gene-snai2	1	snai2	0	-	1
BP	GO:0097120	receptor localization to synapse	1/178	13/11595	0.182268658745461	0.543441798654036	gene-nptx1l	1	nptx1l	1	gene-nptx1l	0
BP	GO:0099175	regulation of postsynapse organization	1/178	13/11595	0.182268658745461	0.543441798654036	gene-nptx1l	1	nptx1l	1	gene-nptx1l	0
BP	GO:0099601	regulation of neurotransmitter receptor activity	1/178	13/11595	0.182268658745461	0.543441798654036	gene-nptx1l	1	nptx1l	1	gene-nptx1l	0
BP	GO:1901532	regulation of hematopoietic progenitor cell differentiation	1/178	13/11595	0.182268658745461	0.543441798654036	gene-nfkbiaa	1	nfkbiaa	1	gene-nfkbiaa	0
BP	GO:0022411	cellular component disassembly	3/178	96/11595	0.183002481690629	0.543441798654036	gene-swap70a/gene-LOC122886528/gene-snai2	3	LOC122886528/snai2/swap70a	1	gene-LOC122886528	2
BP	GO:0006839	mitochondrial transport	2/178	51/11595	0.184285514186812	0.543441798654036	gene-nptx1l/gene-LOC122888793	2	LOC122888793/nptx1l	2	gene-LOC122888793/gene-nptx1l	0
BP	GO:0048878	chemical homeostasis	4/178	146/11595	0.186663212155249	0.543441798654036	gene-swap70a/gene-nptx1l/gene-LOC122881038/gene-LOC122881039	4	LOC122881038/LOC122881039/nptx1l/swap70a	1	gene-nptx1l	3
BP	GO:1901605	alpha-amino acid metabolic process	3/178	97/11595	0.18686302285118	0.543441798654036	gene-LOC122876938/gene-psat1/gene-ddah1	3	ddah1/LOC122876938/psat1	2	gene-LOC122876938/gene-psat1	1
BP	GO:0030178	negative regulation of Wnt signaling pathway	2/178	52/11595	0.189838904348624	0.543441798654036	gene-LOC122884881/gene-snai2	2	LOC122884881/snai2	0	-	2
BP	GO:0030335	positive regulation of cell migration	2/178	52/11595	0.189838904348624	0.543441798654036	gene-swap70a/gene-snai2	2	snai2/swap70a	0	-	2
BP	GO:0097190	apoptotic signaling pathway	2/178	52/11595	0.189838904348624	0.543441798654036	gene-uacab/gene-snai2	2	snai2/uacab	0	-	2
BP	GO:0008064	regulation of actin polymerization or depolymerization	3/178	99/11595	0.194647218799413	0.543441798654036	gene-swap70a/gene-fmn2a/gene-LOC122861414	3	fmn2a/LOC122861414/swap70a	1	gene-LOC122861414	2
BP	GO:0030832	regulation of actin filament length	3/178	99/11595	0.194647218799413	0.543441798654036	gene-swap70a/gene-fmn2a/gene-LOC122861414	3	fmn2a/LOC122861414/swap70a	1	gene-LOC122861414	2
BP	GO:0044089	positive regulation of cellular component biogenesis	3/178	99/11595	0.194647218799413	0.543441798654036	gene-swap70a/gene-fmn2a/gene-LOC122861414	3	fmn2a/LOC122861414/swap70a	1	gene-LOC122861414	2
BP	GO:0000096	sulfur amino acid metabolic process	1/178	14/11595	0.194836106400729	0.543441798654036	gene-LOC122876938	1	LOC122876938	1	gene-LOC122876938	0
BP	GO:0000302	response to reactive oxygen species	1/178	14/11595	0.194836106400729	0.543441798654036	gene-LOC122877917	1	LOC122877917	1	gene-LOC122877917	0
BP	GO:0001824	blastocyst development	1/178	14/11595	0.194836106400729	0.543441798654036	gene-LOC122877917	1	LOC122877917	1	gene-LOC122877917	0
BP	GO:0008630	intrinsic apoptotic signaling pathway in response to DNA damage	1/178	14/11595	0.194836106400729	0.543441798654036	gene-snai2	1	snai2	0	-	1
BP	GO:0009755	hormone-mediated signaling pathway	1/178	14/11595	0.194836106400729	0.543441798654036	gene-LOC122865952	1	LOC122865952	0	-	1
BP	GO:0009880	embryonic pattern specification	1/178	14/11595	0.194836106400729	0.543441798654036	gene-amotl2a	1	amotl2a	0	-	1
BP	GO:0018108	peptidyl-tyrosine phosphorylation	1/178	14/11595	0.194836106400729	0.543441798654036	gene-dok7b	1	dok7b	0	-	1
BP	GO:0031102	neuron projection regeneration	1/178	14/11595	0.194836106400729	0.543441798654036	gene-LOC122877917	1	LOC122877917	1	gene-LOC122877917	0
BP	GO:0031103	axon regeneration	1/178	14/11595	0.194836106400729	0.543441798654036	gene-LOC122877917	1	LOC122877917	1	gene-LOC122877917	0
BP	GO:0043101	purine-containing compound salvage	1/178	14/11595	0.194836106400729	0.543441798654036	gene-ampd3a	1	ampd3a	0	-	1
BP	GO:0046890	regulation of lipid biosynthetic process	1/178	14/11595	0.194836106400729	0.543441798654036	gene-snai2	1	snai2	0	-	1
BP	GO:0060759	regulation of response to cytokine stimulus	1/178	14/11595	0.194836106400729	0.543441798654036	gene-LOC122877917	1	LOC122877917	1	gene-LOC122877917	0
BP	GO:0099518	vesicle cytoskeletal trafficking	1/178	14/11595	0.194836106400729	0.543441798654036	gene-LOC122886528	1	LOC122886528	1	gene-LOC122886528	0
BP	GO:1901987	regulation of cell cycle phase transition	2/178	53/11595	0.195414849825136	0.543441798654036	gene-LOC122877917/gene-LOC122865952	2	LOC122865952/LOC122877917	1	gene-LOC122877917	1
BP	GO:2000147	positive regulation of cell motility	2/178	53/11595	0.195414849825136	0.543441798654036	gene-swap70a/gene-snai2	2	snai2/swap70a	0	-	2
BP	GO:0003008	system process	9/178	421/11595	0.199208033527478	0.543441798654036	gene-tafa3a/gene-nptx1l/gene-parvb/gene-ctns/gene-LOC122877917/gene-snai2/gene-edn1/gene-LOC122863926/gene-pdzph1	9	ctns/edn1/LOC122863926/LOC122877917/nptx1l/parvb/pdzph1/snai2/tafa3a	7	gene-ctns/gene-LOC122863926/gene-LOC122877917/gene-nptx1l/gene-parvb/gene-pdzph1/gene-tafa3a	2
BP	GO:0007229	integrin-mediated signaling pathway	2/178	54/11595	0.201011364232651	0.543441798654036	gene-itga1/gene-itga3b	2	itga1/itga3b	1	gene-itga3b	1
BP	GO:0010975	regulation of neuron projection development	2/178	54/11595	0.201011364232651	0.543441798654036	gene-ndnf/gene-LOC122877917	2	LOC122877917/ndnf	1	gene-LOC122877917	1
BP	GO:0043207	response to external biotic stimulus	6/178	258/11595	0.2056430415549	0.543441798654036	gene-ptx3a/gene-LOC122881038/gene-LOC122881039/gene-wdfy4/gene-nfkbiaa/gene-LOC122868820	6	LOC122868820/LOC122881038/LOC122881039/nfkbiaa/ptx3a/wdfy4	3	gene-nfkbiaa/gene-ptx3a/gene-wdfy4	3
BP	GO:0051707	response to other organism	6/178	258/11595	0.2056430415549	0.543441798654036	gene-ptx3a/gene-LOC122881038/gene-LOC122881039/gene-wdfy4/gene-nfkbiaa/gene-LOC122868820	6	LOC122868820/LOC122881038/LOC122881039/nfkbiaa/ptx3a/wdfy4	3	gene-nfkbiaa/gene-ptx3a/gene-wdfy4	3
BP	GO:0051272	positive regulation of cellular component movement	2/178	55/11595	0.206626516212608	0.543441798654036	gene-swap70a/gene-snai2	2	snai2/swap70a	0	-	2
BP	GO:0048585	negative regulation of response to stimulus	8/178	369/11595	0.20709817163918	0.543441798654036	gene-metrnlb/gene-LOC122877917/gene-LOC122884881/gene-snai2/gene-LOC122865952/gene-nog2/gene-LOC122868714/gene-LOC122871826	8	LOC122865952/LOC122868714/LOC122871826/LOC122877917/LOC122884881/metrnlb/nog2/snai2	2	gene-LOC122877917/gene-metrnlb	6
BP	GO:0002285	lymphocyte activation involved in immune response	1/178	15/11595	0.207211477531086	0.543441798654036	gene-swap70a	1	swap70a	0	-	1
BP	GO:0009743	response to carbohydrate	1/178	15/11595	0.207211477531086	0.543441798654036	gene-nptx1l	1	nptx1l	1	gene-nptx1l	0
BP	GO:0009746	response to hexose	1/178	15/11595	0.207211477531086	0.543441798654036	gene-nptx1l	1	nptx1l	1	gene-nptx1l	0
BP	GO:0009749	response to glucose	1/178	15/11595	0.207211477531086	0.543441798654036	gene-nptx1l	1	nptx1l	1	gene-nptx1l	0
BP	GO:0010976	positive regulation of neuron projection development	1/178	15/11595	0.207211477531086	0.543441798654036	gene-ndnf	1	ndnf	0	-	1
BP	GO:0021879	forebrain neuron differentiation	1/178	15/11595	0.207211477531086	0.543441798654036	gene-ndnf	1	ndnf	0	-	1
BP	GO:0032231	regulation of actin filament bundle assembly	1/178	15/11595	0.207211477531086	0.543441798654036	gene-swap70a	1	swap70a	0	-	1
BP	GO:0034284	response to monosaccharide	1/178	15/11595	0.207211477531086	0.543441798654036	gene-nptx1l	1	nptx1l	1	gene-nptx1l	0
BP	GO:0043954	cellular component maintenance	1/178	15/11595	0.207211477531086	0.543441798654036	gene-pdzph1	1	pdzph1	1	gene-pdzph1	0
BP	GO:0045766	positive regulation of angiogenesis	1/178	15/11595	0.207211477531086	0.543441798654036	gene-LOC122877917	1	LOC122877917	1	gene-LOC122877917	0
BP	GO:0051262	protein tetramerization	1/178	15/11595	0.207211477531086	0.543441798654036	gene-trpm6	1	trpm6	0	-	1
BP	GO:0060219	camera-type eye photoreceptor cell differentiation	1/178	15/11595	0.207211477531086	0.543441798654036	gene-rpgrb	1	rpgrb	0	-	1
BP	GO:1903038	negative regulation of leukocyte cell-cell adhesion	1/178	15/11595	0.207211477531086	0.543441798654036	gene-LOC122877917	1	LOC122877917	1	gene-LOC122877917	0
BP	GO:1904018	positive regulation of vasculature development	1/178	15/11595	0.207211477531086	0.543441798654036	gene-LOC122877917	1	LOC122877917	1	gene-LOC122877917	0
BP	GO:2000278	regulation of DNA biosynthetic process	1/178	15/11595	0.207211477531086	0.543441798654036	gene-LOC122877917	1	LOC122877917	1	gene-LOC122877917	0
BP	GO:2001252	positive regulation of chromosome organization	1/178	15/11595	0.207211477531086	0.543441798654036	gene-snai2	1	snai2	0	-	1
BP	GO:0032273	positive regulation of protein polymerization	2/178	56/11595	0.212258428226396	0.543441798654036	gene-fmn2a/gene-LOC122861414	2	fmn2a/LOC122861414	1	gene-LOC122861414	1
BP	GO:0009799	specification of symmetry	3/178	104/11595	0.214442302239096	0.543441798654036	gene-skib/gene-rpgrb/gene-LOC122871826	3	LOC122871826/rpgrb/skib	0	-	3
BP	GO:0009855	determination of bilateral symmetry	3/178	104/11595	0.214442302239096	0.543441798654036	gene-skib/gene-rpgrb/gene-LOC122871826	3	LOC122871826/rpgrb/skib	0	-	3
BP	GO:0045934	negative regulation of nucleobase-containing compound metabolic process	5/178	208/11595	0.215702207587708	0.543441798654036	gene-LOC122877917/gene-snai2/gene-id2a/gene-jazf1a/gene-LOC122865952	5	id2a/jazf1a/LOC122865952/LOC122877917/snai2	1	gene-LOC122877917	4
BP	GO:0031099	regeneration	2/178	57/11595	0.217905275373873	0.543441798654036	gene-ccn1/gene-LOC122877917	2	ccn1/LOC122877917	1	gene-LOC122877917	1
BP	GO:0040017	positive regulation of locomotion	2/178	57/11595	0.217905275373873	0.543441798654036	gene-swap70a/gene-snai2	2	snai2/swap70a	0	-	2
BP	GO:0006275	regulation of DNA replication	1/178	16/11595	0.219397691434321	0.543441798654036	gene-LOC122868820	1	LOC122868820	0	-	1
BP	GO:0007632	visual behavior	1/178	16/11595	0.219397691434321	0.543441798654036	gene-tafa3a	1	tafa3a	1	gene-tafa3a	0
BP	GO:0010811	positive regulation of cell-substrate adhesion	1/178	16/11595	0.219397691434321	0.543441798654036	gene-ndnf	1	ndnf	0	-	1
BP	GO:0018212	peptidyl-tyrosine modification	1/178	16/11595	0.219397691434321	0.543441798654036	gene-dok7b	1	dok7b	0	-	1
BP	GO:0021872	forebrain generation of neurons	1/178	16/11595	0.219397691434321	0.543441798654036	gene-ndnf	1	ndnf	0	-	1
BP	GO:0030865	cortical cytoskeleton organization	1/178	16/11595	0.219397691434321	0.543441798654036	gene-amotl2a	1	amotl2a	0	-	1
BP	GO:0030866	cortical actin cytoskeleton organization	1/178	16/11595	0.219397691434321	0.543441798654036	gene-amotl2a	1	amotl2a	0	-	1
BP	GO:0034446	substrate adhesion-dependent cell spreading	1/178	16/11595	0.219397691434321	0.543441798654036	gene-lamb3	1	lamb3	1	gene-lamb3	0
BP	GO:0050906	detection of stimulus involved in sensory perception	1/178	16/11595	0.219397691434321	0.543441798654036	gene-LOC122863926	1	LOC122863926	1	gene-LOC122863926	0
BP	GO:0051963	regulation of synapse assembly	1/178	16/11595	0.219397691434321	0.543441798654036	gene-nptx1l	1	nptx1l	1	gene-nptx1l	0
BP	GO:0061318	renal filtration cell differentiation	1/178	16/11595	0.219397691434321	0.543441798654036	gene-LOC122865952	1	LOC122865952	0	-	1
BP	GO:0071219	cellular response to molecule of bacterial origin	1/178	16/11595	0.219397691434321	0.543441798654036	gene-LOC122868820	1	LOC122868820	0	-	1
BP	GO:0071222	cellular response to lipopolysaccharide	1/178	16/11595	0.219397691434321	0.543441798654036	gene-LOC122868820	1	LOC122868820	0	-	1
BP	GO:0071383	cellular response to steroid hormone stimulus	1/178	16/11595	0.219397691434321	0.543441798654036	gene-LOC122865952	1	LOC122865952	0	-	1
BP	GO:0072010	glomerular epithelium development	1/178	16/11595	0.219397691434321	0.543441798654036	gene-LOC122865952	1	LOC122865952	0	-	1
BP	GO:0072112	glomerular visceral epithelial cell differentiation	1/178	16/11595	0.219397691434321	0.543441798654036	gene-LOC122865952	1	LOC122865952	0	-	1
BP	GO:0072311	glomerular epithelial cell differentiation	1/178	16/11595	0.219397691434321	0.543441798654036	gene-LOC122865952	1	LOC122865952	0	-	1
BP	GO:1901654	response to ketone	1/178	16/11595	0.219397691434321	0.543441798654036	gene-LOC122877917	1	LOC122877917	1	gene-LOC122877917	0
BP	GO:2000027	regulation of animal organ morphogenesis	1/178	16/11595	0.219397691434321	0.543441798654036	gene-snai2	1	snai2	0	-	1
BP	GO:2000116	regulation of cysteine-type endopeptidase activity	1/178	16/11595	0.219397691434321	0.543441798654036	gene-LOC122877917	1	LOC122877917	1	gene-LOC122877917	0
BP	GO:0009887	animal organ morphogenesis	6/178	264/11595	0.220225831411941	0.543441798654036	gene-skib/gene-lamb3/gene-snai2/gene-id2a/gene-pthlha/gene-rpgrb	6	id2a/lamb3/pthlha/rpgrb/skib/snai2	1	gene-lamb3	5
BP	GO:0003007	heart morphogenesis	2/178	58/11595	0.223565284235133	0.543441798654036	gene-skib/gene-snai2	2	skib/snai2	0	-	2
BP	GO:0030097	hemopoiesis	5/178	211/11595	0.22402943524915	0.543441798654036	gene-LOC122877917/gene-zbtb46/gene-tgfb3/gene-nfkbiaa/gene-lrrc17	5	LOC122877917/lrrc17/nfkbiaa/tgfb3/zbtb46	2	gene-LOC122877917/gene-nfkbiaa	3
BP	GO:0030041	actin filament polymerization	3/178	107/11595	0.226520563325021	0.543441798654036	gene-fmn2a/gene-LOC122861414/gene-LOC122867164	3	fmn2a/LOC122861414/LOC122867164	1	gene-LOC122861414	2
BP	GO:0048534	hematopoietic or lymphoid organ development	5/178	212/11595	0.226826833223796	0.543441798654036	gene-LOC122877917/gene-zbtb46/gene-tgfb3/gene-nfkbiaa/gene-lrrc17	5	LOC122877917/lrrc17/nfkbiaa/tgfb3/zbtb46	2	gene-LOC122877917/gene-nfkbiaa	3
BP	GO:0001775	cell activation	4/178	159/11595	0.228094710766617	0.543441798654036	gene-swap70a/gene-LOC122873767/gene-wdfy4/gene-ndrg1a	4	LOC122873767/ndrg1a/swap70a/wdfy4	3	gene-LOC122873767/gene-ndrg1a/gene-wdfy4	1
BP	GO:0007265	Ras protein signal transduction	3/178	108/11595	0.230576041775596	0.543441798654036	gene-rasgrp3/gene-arfgef3/gene-LOC122865952	3	arfgef3/LOC122865952/rasgrp3	2	gene-arfgef3/gene-rasgrp3	1
BP	GO:0006766	vitamin metabolic process	1/178	17/11595	0.231397623287218	0.543441798654036	gene-snai2	1	snai2	0	-	1
BP	GO:0009069	serine family amino acid metabolic process	1/178	17/11595	0.231397623287218	0.543441798654036	gene-psat1	1	psat1	1	gene-psat1	0
BP	GO:0016064	immunoglobulin mediated immune response	1/178	17/11595	0.231397623287218	0.543441798654036	gene-swap70a	1	swap70a	0	-	1
BP	GO:0019724	B cell mediated immunity	1/178	17/11595	0.231397623287218	0.543441798654036	gene-swap70a	1	swap70a	0	-	1
BP	GO:0021675	nerve development	1/178	17/11595	0.231397623287218	0.543441798654036	gene-nptx1l	1	nptx1l	1	gene-nptx1l	0
BP	GO:0031532	actin cytoskeleton reorganization	1/178	17/11595	0.231397623287218	0.543441798654036	gene-parvb	1	parvb	1	gene-parvb	0
BP	GO:0043173	nucleotide salvage	1/178	17/11595	0.231397623287218	0.543441798654036	gene-ampd3a	1	ampd3a	0	-	1
BP	GO:0043534	blood vessel endothelial cell migration	1/178	17/11595	0.231397623287218	0.543441798654036	gene-LOC122877917	1	LOC122877917	1	gene-LOC122877917	0
BP	GO:0046631	alpha-beta T cell activation	1/178	17/11595	0.231397623287218	0.543441798654036	gene-wdfy4	1	wdfy4	1	gene-wdfy4	0
BP	GO:0050890	cognition	1/178	17/11595	0.231397623287218	0.543441798654036	gene-tafa3a	1	tafa3a	1	gene-tafa3a	0
BP	GO:0051896	regulation of protein kinase B signaling	1/178	17/11595	0.231397623287218	0.543441798654036	gene-LOC122877917	1	LOC122877917	1	gene-LOC122877917	0
BP	GO:0052548	regulation of endopeptidase activity	1/178	17/11595	0.231397623287218	0.543441798654036	gene-LOC122877917	1	LOC122877917	1	gene-LOC122877917	0
BP	GO:0060218	hematopoietic stem cell differentiation	1/178	17/11595	0.231397623287218	0.543441798654036	gene-tgfb3	1	tgfb3	0	-	1
BP	GO:0072331	signal transduction by p53 class mediator	1/178	17/11595	0.231397623287218	0.543441798654036	gene-snai2	1	snai2	0	-	1
BP	GO:1901215	negative regulation of neuron death	1/178	17/11595	0.231397623287218	0.543441798654036	gene-ndnf	1	ndnf	0	-	1
BP	GO:1901983	regulation of protein acetylation	1/178	17/11595	0.231397623287218	0.543441798654036	gene-snai2	1	snai2	0	-	1
BP	GO:2000756	regulation of peptidyl-lysine acetylation	1/178	17/11595	0.231397623287218	0.543441798654036	gene-snai2	1	snai2	0	-	1
BP	GO:2001242	regulation of intrinsic apoptotic signaling pathway	1/178	17/11595	0.231397623287218	0.543441798654036	gene-snai2	1	snai2	0	-	1
BP	GO:0009894	regulation of catabolic process	3/178	109/11595	0.234645089313463	0.546304448927439	gene-ctns/gene-LOC122886528/gene-dcn	3	ctns/dcn/LOC122886528	3	gene-ctns/gene-dcn/gene-LOC122886528	0
BP	GO:0043244	regulation of protein-containing complex disassembly	2/178	60/11595	0.234917944030657	0.546304448927439	gene-swap70a/gene-LOC122886528	2	LOC122886528/swap70a	1	gene-LOC122886528	1
BP	GO:0060047	heart contraction	2/178	60/11595	0.234917944030657	0.546304448927439	gene-parvb/gene-pdzph1	2	parvb/pdzph1	2	gene-parvb/gene-pdzph1	0
BP	GO:0110053	regulation of actin filament organization	3/178	110/11595	0.238727039253649	0.546304448927439	gene-swap70a/gene-fmn2a/gene-LOC122861414	3	fmn2a/LOC122861414/swap70a	1	gene-LOC122861414	2
BP	GO:0003015	heart process	2/178	61/11595	0.240607295419426	0.546304448927439	gene-parvb/gene-pdzph1	2	parvb/pdzph1	2	gene-parvb/gene-pdzph1	0
BP	GO:0031334	positive regulation of protein-containing complex assembly	2/178	61/11595	0.240607295419426	0.546304448927439	gene-fmn2a/gene-LOC122861414	2	fmn2a/LOC122861414	1	gene-LOC122861414	1
BP	GO:0051239	regulation of multicellular organismal process	9/178	444/11595	0.243070309723357	0.546304448927439	gene-nptx1l/gene-parvb/gene-LOC122877917/gene-zbtb46/gene-snai2/gene-tgfb3/gene-edn1/gene-pdzph1/gene-lrrc17	9	edn1/LOC122877917/lrrc17/nptx1l/parvb/pdzph1/snai2/tgfb3/zbtb46	4	gene-LOC122877917/gene-nptx1l/gene-parvb/gene-pdzph1	5
BP	GO:0007422	peripheral nervous system development	1/178	18/11595	0.243214104808627	0.546304448927439	gene-ndrg1a	1	ndrg1a	1	gene-ndrg1a	0
BP	GO:0009066	aspartate family amino acid metabolic process	1/178	18/11595	0.243214104808627	0.546304448927439	gene-LOC122876938	1	LOC122876938	1	gene-LOC122876938	0
BP	GO:0009166	nucleotide catabolic process	1/178	18/11595	0.243214104808627	0.546304448927439	gene-pde4ba	1	pde4ba	0	-	1
BP	GO:0019229	regulation of vasoconstriction	1/178	18/11595	0.243214104808627	0.546304448927439	gene-edn1	1	edn1	0	-	1
BP	GO:0033334	fin morphogenesis	1/178	18/11595	0.243214104808627	0.546304448927439	gene-itga3b	1	itga3b	1	gene-itga3b	0
BP	GO:0035304	regulation of protein dephosphorylation	1/178	18/11595	0.243214104808627	0.546304448927439	gene-swap70a	1	swap70a	0	-	1
BP	GO:0035418	protein localization to synapse	1/178	18/11595	0.243214104808627	0.546304448927439	gene-nptx1l	1	nptx1l	1	gene-nptx1l	0
BP	GO:0043491	protein kinase B signaling	1/178	18/11595	0.243214104808627	0.546304448927439	gene-LOC122877917	1	LOC122877917	1	gene-LOC122877917	0
BP	GO:0048678	response to axon injury	1/178	18/11595	0.243214104808627	0.546304448927439	gene-LOC122877917	1	LOC122877917	1	gene-LOC122877917	0
BP	GO:0052547	regulation of peptidase activity	1/178	18/11595	0.243214104808627	0.546304448927439	gene-LOC122877917	1	LOC122877917	1	gene-LOC122877917	0
BP	GO:0062014	negative regulation of small molecule metabolic process	1/178	18/11595	0.243214104808627	0.546304448927439	gene-snai2	1	snai2	0	-	1
BP	GO:1902107	positive regulation of leukocyte differentiation	1/178	18/11595	0.243214104808627	0.546304448927439	gene-zbtb46	1	zbtb46	0	-	1
BP	GO:2001234	negative regulation of apoptotic signaling pathway	1/178	18/11595	0.243214104808627	0.546304448927439	gene-snai2	1	snai2	0	-	1
BP	GO:0046578	regulation of Ras protein signal transduction	2/178	62/11595	0.246303207270609	0.552040449339125	gene-arfgef3/gene-LOC122865952	2	arfgef3/LOC122865952	1	gene-arfgef3	1
BP	GO:0007264	small GTPase mediated signal transduction	5/178	220/11595	0.249564264700679	0.55244139455304	gene-rgl2/gene-rasgrp3/gene-arfgef3/gene-LOC122865952/gene-LOC122869789	5	arfgef3/LOC122865952/LOC122869789/rasgrp3/rgl2	4	gene-arfgef3/gene-LOC122869789/gene-rasgrp3/gene-rgl2	1
BP	GO:0050728	negative regulation of inflammatory response	2/178	63/11595	0.252004146976656	0.55244139455304	gene-metrnlb/gene-LOC122868714	2	LOC122868714/metrnlb	1	gene-metrnlb	1
BP	GO:0010212	response to ionizing radiation	1/178	19/11595	0.254849924912632	0.55244139455304	gene-snai2	1	snai2	0	-	1
BP	GO:0030282	bone mineralization	1/178	19/11595	0.254849924912632	0.55244139455304	gene-pthlha	1	pthlha	0	-	1
BP	GO:0051781	positive regulation of cell division	1/178	19/11595	0.254849924912632	0.55244139455304	gene-tgfb3	1	tgfb3	0	-	1
BP	GO:0071248	cellular response to metal ion	1/178	19/11595	0.254849924912632	0.55244139455304	gene-nptx1l	1	nptx1l	1	gene-nptx1l	0
BP	GO:0071478	cellular response to radiation	1/178	19/11595	0.254849924912632	0.55244139455304	gene-snai2	1	snai2	0	-	1
BP	GO:1902414	protein localization to cell junction	1/178	19/11595	0.254849924912632	0.55244139455304	gene-nptx1l	1	nptx1l	1	gene-nptx1l	0
BP	GO:1903510	mucopolysaccharide metabolic process	1/178	19/11595	0.254849924912632	0.55244139455304	gene-ndnf	1	ndnf	0	-	1
BP	GO:1903708	positive regulation of hemopoiesis	1/178	19/11595	0.254849924912632	0.55244139455304	gene-zbtb46	1	zbtb46	0	-	1
BP	GO:2000113	negative regulation of cellular macromolecule biosynthetic process	5/178	222/11595	0.255340077546687	0.55244139455304	gene-LOC122877917/gene-snai2/gene-id2a/gene-jazf1a/gene-LOC122865952	5	id2a/jazf1a/LOC122865952/LOC122877917/snai2	1	gene-LOC122877917	4
BP	GO:0033043	regulation of organelle organization	6/178	278/11595	0.255513602167396	0.55244139455304	gene-swap70a/gene-nptx1l/gene-fmn2a/gene-LOC122886528/gene-snai2/gene-LOC122861414	6	fmn2a/LOC122861414/LOC122886528/nptx1l/snai2/swap70a	3	gene-LOC122861414/gene-LOC122886528/gene-nptx1l	3
BP	GO:1901617	organic hydroxy compound biosynthetic process	2/178	64/11595	0.257708626925882	0.55244139455304	gene-snai2/gene-LOC122871599	2	LOC122871599/snai2	1	gene-LOC122871599	1
BP	GO:0006520	cellular amino acid metabolic process	4/178	168/11595	0.258030901834761	0.55244139455304	gene-LOC122876938/gene-psat1/gene-ddah1/gene-enosf1	4	ddah1/enosf1/LOC122876938/psat1	3	gene-enosf1/gene-LOC122876938/gene-psat1	1
BP	GO:0008015	blood circulation	3/178	115/11595	0.2593074443913	0.55244139455304	gene-parvb/gene-edn1/gene-pdzph1	3	edn1/parvb/pdzph1	2	gene-parvb/gene-pdzph1	1
BP	GO:0010564	regulation of cell cycle process	3/178	115/11595	0.2593074443913	0.55244139455304	gene-LOC122877917/gene-LOC122865952/gene-LOC122868820	3	LOC122865952/LOC122868820/LOC122877917	1	gene-LOC122877917	2
BP	GO:0046394	carboxylic acid biosynthetic process	3/178	115/11595	0.2593074443913	0.55244139455304	gene-LOC122876938/gene-psat1/gene-LOC122871599	3	LOC122871599/LOC122876938/psat1	3	gene-LOC122871599/gene-LOC122876938/gene-psat1	0
BP	GO:0048762	mesenchymal cell differentiation	2/178	65/11595	0.263415203495463	0.55244139455304	gene-snai1a/gene-snai2	2	snai1a/snai2	0	-	2
BP	GO:0071417	cellular response to organonitrogen compound	2/178	65/11595	0.263415203495463	0.55244139455304	gene-LOC122864683/gene-LOC122877917	2	LOC122864683/LOC122877917	2	gene-LOC122864683/gene-LOC122877917	0
BP	GO:0016053	organic acid biosynthetic process	3/178	116/11595	0.263453173927499	0.55244139455304	gene-LOC122876938/gene-psat1/gene-LOC122871599	3	LOC122871599/LOC122876938/psat1	3	gene-LOC122871599/gene-LOC122876938/gene-psat1	0
BP	GO:0010558	negative regulation of macromolecule biosynthetic process	5/178	225/11595	0.264065242441238	0.55244139455304	gene-LOC122877917/gene-snai2/gene-id2a/gene-jazf1a/gene-LOC122865952	5	id2a/jazf1a/LOC122865952/LOC122877917/snai2	1	gene-LOC122877917	4
BP	GO:0097435	supramolecular fiber organization	6/178	282/11595	0.265876909815722	0.55244139455304	gene-swap70a/gene-LOC122873669/gene-LOC122880325/gene-fmn2a/gene-LOC122861414/gene-LOC122867164	6	fmn2a/LOC122861414/LOC122867164/LOC122873669/LOC122880325/swap70a	2	gene-LOC122861414/gene-LOC122880325	4
BP	GO:0001678	cellular glucose homeostasis	1/178	20/11595	0.266307830351951	0.55244139455304	gene-nptx1l	1	nptx1l	1	gene-nptx1l	0
BP	GO:0019882	antigen processing and presentation	1/178	20/11595	0.266307830351951	0.55244139455304	gene-wdfy4	1	wdfy4	1	gene-wdfy4	0
BP	GO:0021536	diencephalon development	1/178	20/11595	0.266307830351951	0.55244139455304	gene-ndnf	1	ndnf	0	-	1
BP	GO:0021782	glial cell development	1/178	20/11595	0.266307830351951	0.55244139455304	gene-ndrg1a	1	ndrg1a	1	gene-ndrg1a	0
BP	GO:0031101	fin regeneration	1/178	20/11595	0.266307830351951	0.55244139455304	gene-ccn1	1	ccn1	0	-	1
BP	GO:0032963	collagen metabolic process	1/178	20/11595	0.266307830351951	0.55244139455304	gene-mmp9	1	mmp9	1	gene-mmp9	0
BP	GO:0035305	negative regulation of dephosphorylation	1/178	20/11595	0.266307830351951	0.55244139455304	gene-swap70a	1	swap70a	0	-	1
BP	GO:0042552	myelination	1/178	20/11595	0.266307830351951	0.55244139455304	gene-ndrg1a	1	ndrg1a	1	gene-ndrg1a	0
BP	GO:0043523	regulation of neuron apoptotic process	1/178	20/11595	0.266307830351951	0.55244139455304	gene-ndnf	1	ndnf	0	-	1
BP	GO:0051402	neuron apoptotic process	1/178	20/11595	0.266307830351951	0.55244139455304	gene-ndnf	1	ndnf	0	-	1
BP	GO:0070373	negative regulation of ERK1 and ERK2 cascade	1/178	20/11595	0.266307830351951	0.55244139455304	gene-LOC122877917	1	LOC122877917	1	gene-LOC122877917	0
BP	GO:0071241	cellular response to inorganic substance	1/178	20/11595	0.266307830351951	0.55244139455304	gene-nptx1l	1	nptx1l	1	gene-nptx1l	0
BP	GO:0090090	negative regulation of canonical Wnt signaling pathway	1/178	20/11595	0.266307830351951	0.55244139455304	gene-snai2	1	snai2	0	-	1
BP	GO:0090263	positive regulation of canonical Wnt signaling pathway	1/178	20/11595	0.266307830351951	0.55244139455304	gene-tmem198a	1	tmem198a	1	gene-tmem198a	0
BP	GO:0090288	negative regulation of cellular response to growth factor stimulus	1/178	20/11595	0.266307830351951	0.55244139455304	gene-nog2	1	nog2	0	-	1
BP	GO:0003013	circulatory system process	3/178	117/11595	0.267607324141203	0.554022391946949	gene-parvb/gene-edn1/gene-pdzph1	3	edn1/parvb/pdzph1	2	gene-parvb/gene-pdzph1	1
BP	GO:0051241	negative regulation of multicellular organismal process	4/178	172/11595	0.271585439321273	0.555720063434224	gene-LOC122877917/gene-zbtb46/gene-snai2/gene-lrrc17	4	LOC122877917/lrrc17/snai2/zbtb46	1	gene-LOC122877917	3
BP	GO:0002366	leukocyte activation involved in immune response	1/178	21/11595	0.277590526351722	0.555720063434224	gene-swap70a	1	swap70a	0	-	1
BP	GO:0007272	ensheathment of neurons	1/178	21/11595	0.277590526351722	0.555720063434224	gene-ndrg1a	1	ndrg1a	1	gene-ndrg1a	0
BP	GO:0008366	axon ensheathment	1/178	21/11595	0.277590526351722	0.555720063434224	gene-ndrg1a	1	ndrg1a	1	gene-ndrg1a	0
BP	GO:0010469	regulation of signaling receptor activity	1/178	21/11595	0.277590526351722	0.555720063434224	gene-nptx1l	1	nptx1l	1	gene-nptx1l	0
BP	GO:0016525	negative regulation of angiogenesis	1/178	21/11595	0.277590526351722	0.555720063434224	gene-LOC122877917	1	LOC122877917	1	gene-LOC122877917	0
BP	GO:0017015	regulation of transforming growth factor beta receptor signaling pathway	1/178	21/11595	0.277590526351722	0.555720063434224	gene-LOC122871826	1	LOC122871826	0	-	1
BP	GO:0021954	central nervous system neuron development	1/178	21/11595	0.277590526351722	0.555720063434224	gene-ndnf	1	ndnf	0	-	1
BP	GO:0034599	cellular response to oxidative stress	1/178	21/11595	0.277590526351722	0.555720063434224	gene-LOC122877917	1	LOC122877917	1	gene-LOC122877917	0
BP	GO:0035023	regulation of Rho protein signal transduction	1/178	21/11595	0.277590526351722	0.555720063434224	gene-LOC122865952	1	LOC122865952	0	-	1
BP	GO:0035272	exocrine system development	1/178	21/11595	0.277590526351722	0.555720063434224	gene-snai2	1	snai2	0	-	1
BP	GO:0035850	epithelial cell differentiation involved in kidney development	1/178	21/11595	0.277590526351722	0.555720063434224	gene-LOC122865952	1	LOC122865952	0	-	1
BP	GO:0061005	cell differentiation involved in kidney development	1/178	21/11595	0.277590526351722	0.555720063434224	gene-LOC122865952	1	LOC122865952	0	-	1
BP	GO:0071216	cellular response to biotic stimulus	1/178	21/11595	0.277590526351722	0.555720063434224	gene-LOC122868820	1	LOC122868820	0	-	1
BP	GO:1901292	nucleoside phosphate catabolic process	1/178	21/11595	0.277590526351722	0.555720063434224	gene-pde4ba	1	pde4ba	0	-	1
BP	GO:1903844	regulation of cellular response to transforming growth factor beta stimulus	1/178	21/11595	0.277590526351722	0.555720063434224	gene-LOC122871826	1	LOC122871826	0	-	1
BP	GO:2000181	negative regulation of blood vessel morphogenesis	1/178	21/11595	0.277590526351722	0.555720063434224	gene-LOC122877917	1	LOC122877917	1	gene-LOC122877917	0
BP	GO:0007507	heart development	4/178	174/11595	0.278409958296121	0.556280362409498	gene-skib/gene-snai2/gene-pdzph1/gene-si:ch211-198m17.1	4	pdzph1/si:ch211-198m17.1/skib/snai2	1	gene-pdzph1	3
BP	GO:0048699	generation of neurons	8/178	403/11595	0.279072119269879	0.556524864540127	gene-nptx1l/gene-reln/gene-ndnf/gene-LOC122877917/gene-LOC122888546/gene-id2a/gene-LOC122867164/gene-rpgrb	8	id2a/LOC122867164/LOC122877917/LOC122888546/ndnf/nptx1l/reln/rpgrb	2	gene-LOC122877917/gene-nptx1l	6
BP	GO:0044772	mitotic cell cycle phase transition	2/178	68/11595	0.280533715941846	0.557283740146519	gene-LOC122877917/gene-LOC122865952	2	LOC122865952/LOC122877917	1	gene-LOC122877917	1
BP	GO:0048592	eye morphogenesis	2/178	68/11595	0.280533715941846	0.557283740146519	gene-id2a/gene-rpgrb	2	id2a/rpgrb	0	-	2
BP	GO:0009790	embryo development	8/178	404/11595	0.281291827575223	0.557715142750105	gene-skib/gene-snai1a/gene-LOC122877612/gene-amotl2a/gene-LOC122877917/gene-rundc1/gene-pthlha/gene-LOC122871826	8	amotl2a/LOC122871826/LOC122877612/LOC122877917/pthlha/rundc1/skib/snai1a	2	gene-LOC122877917/gene-rundc1	6
BP	GO:0098609	cell-cell adhesion	5/178	232/11595	0.284680042049801	0.561604524958618	gene-swap70a/gene-LOC122878341/gene-LOC122877917/gene-pcdh15a/gene-pdzph1	5	LOC122877917/LOC122878341/pcdh15a/pdzph1/swap70a	2	gene-LOC122877917/gene-pdzph1	3
BP	GO:0031348	negative regulation of defense response	2/178	69/11595	0.286235088408103	0.561604524958618	gene-metrnlb/gene-LOC122868714	2	LOC122868714/metrnlb	1	gene-metrnlb	1
BP	GO:0048863	stem cell differentiation	2/178	69/11595	0.286235088408103	0.561604524958618	gene-snai2/gene-tgfb3	2	snai2/tgfb3	0	-	2
BP	GO:0002263	cell activation involved in immune response	1/178	22/11595	0.288700677233819	0.561604524958618	gene-swap70a	1	swap70a	0	-	1
BP	GO:0008593	regulation of Notch signaling pathway	1/178	22/11595	0.288700677233819	0.561604524958618	gene-id2a	1	id2a	0	-	1
BP	GO:0016573	histone acetylation	1/178	22/11595	0.288700677233819	0.561604524958618	gene-snai2	1	snai2	0	-	1
BP	GO:0032011	ARF protein signal transduction	1/178	22/11595	0.288700677233819	0.561604524958618	gene-arfgef3	1	arfgef3	1	gene-arfgef3	0
BP	GO:0032012	regulation of ARF protein signal transduction	1/178	22/11595	0.288700677233819	0.561604524958618	gene-arfgef3	1	arfgef3	1	gene-arfgef3	0
BP	GO:0051054	positive regulation of DNA metabolic process	1/178	22/11595	0.288700677233819	0.561604524958618	gene-LOC122877917	1	LOC122877917	1	gene-LOC122877917	0
BP	GO:0090504	epiboly	1/178	22/11595	0.288700677233819	0.561604524958618	gene-snai2	1	snai2	0	-	1
BP	GO:0007268	chemical synaptic transmission	3/178	124/11595	0.296871608937229	0.566843624128104	gene-nptx1l/gene-htr4/gene-LOC122871213	3	htr4/LOC122871213/nptx1l	1	gene-nptx1l	2
BP	GO:0043010	camera-type eye development	3/178	124/11595	0.296871608937229	0.566843624128104	gene-LOC122877917/gene-id2a/gene-rpgrb	3	id2a/LOC122877917/rpgrb	1	gene-LOC122877917	2
BP	GO:0098916	anterograde trans-synaptic signaling	3/178	124/11595	0.296871608937229	0.566843624128104	gene-nptx1l/gene-htr4/gene-LOC122871213	3	htr4/LOC122871213/nptx1l	1	gene-nptx1l	2
BP	GO:0099537	trans-synaptic signaling	3/178	124/11595	0.296871608937229	0.566843624128104	gene-nptx1l/gene-htr4/gene-LOC122871213	3	htr4/LOC122871213/nptx1l	1	gene-nptx1l	2
BP	GO:0009100	glycoprotein metabolic process	4/178	180/11595	0.299040260011822	0.566843624128104	gene-xylt1/gene-ndnf/gene-LOC122863823/gene-dcn	4	dcn/LOC122863823/ndnf/xylt1	1	gene-dcn	3
BP	GO:0090066	regulation of anatomical structure size	4/178	180/11595	0.299040260011822	0.566843624128104	gene-swap70a/gene-fmn2a/gene-LOC122861414/gene-edn1	4	edn1/fmn2a/LOC122861414/swap70a	1	gene-LOC122861414	3
BP	GO:0001754	eye photoreceptor cell differentiation	1/178	23/11595	0.29964090703183	0.566843624128104	gene-rpgrb	1	rpgrb	0	-	1
BP	GO:0006475	internal protein amino acid acetylation	1/178	23/11595	0.29964090703183	0.566843624128104	gene-snai2	1	snai2	0	-	1
BP	GO:0007093	mitotic cell cycle checkpoint	1/178	23/11595	0.29964090703183	0.566843624128104	gene-id2a	1	id2a	0	-	1
BP	GO:0009127	purine nucleoside monophosphate biosynthetic process	1/178	23/11595	0.29964090703183	0.566843624128104	gene-ampd3a	1	ampd3a	0	-	1
BP	GO:0009168	purine ribonucleoside monophosphate biosynthetic process	1/178	23/11595	0.29964090703183	0.566843624128104	gene-ampd3a	1	ampd3a	0	-	1
BP	GO:0018393	internal peptidyl-lysine acetylation	1/178	23/11595	0.29964090703183	0.566843624128104	gene-snai2	1	snai2	0	-	1
BP	GO:0045103	intermediate filament-based process	1/178	23/11595	0.29964090703183	0.566843624128104	gene-LOC122878341	1	LOC122878341	0	-	1
BP	GO:0045104	intermediate filament cytoskeleton organization	1/178	23/11595	0.29964090703183	0.566843624128104	gene-LOC122878341	1	LOC122878341	0	-	1
BP	GO:0046058	cAMP metabolic process	1/178	23/11595	0.29964090703183	0.566843624128104	gene-pde4ba	1	pde4ba	0	-	1
BP	GO:0031175	neuron projection development	5/178	238/11595	0.302590022848877	0.568563641426513	gene-nptx1l/gene-ndnf/gene-LOC122877917/gene-LOC122888546/gene-LOC122867164	5	LOC122867164/LOC122877917/LOC122888546/ndnf/nptx1l	2	gene-LOC122877917/gene-nptx1l	3
BP	GO:0044283	small molecule biosynthetic process	5/178	238/11595	0.302590022848877	0.568563641426513	gene-LOC122876938/gene-psat1/gene-pde4ba/gene-snai2/gene-LOC122871599	5	LOC122871599/LOC122876938/pde4ba/psat1/snai2	3	gene-LOC122871599/gene-LOC122876938/gene-psat1	2
BP	GO:0002521	leukocyte differentiation	2/178	72/11595	0.303307471178062	0.568563641426513	gene-zbtb46/gene-lrrc17	2	lrrc17/zbtb46	0	-	2
BP	GO:0046395	carboxylic acid catabolic process	2/178	72/11595	0.303307471178062	0.568563641426513	gene-ddah1/gene-enosf1	2	ddah1/enosf1	1	gene-enosf1	1
BP	GO:1901699	cellular response to nitrogen compound	2/178	72/11595	0.303307471178062	0.568563641426513	gene-LOC122864683/gene-LOC122877917	2	LOC122864683/LOC122877917	2	gene-LOC122864683/gene-LOC122877917	0
BP	GO:0031327	negative regulation of cellular biosynthetic process	5/178	239/11595	0.30559306019174	0.570530073870544	gene-LOC122877917/gene-snai2/gene-id2a/gene-jazf1a/gene-LOC122865952	5	id2a/jazf1a/LOC122865952/LOC122877917/snai2	1	gene-LOC122877917	4
BP	GO:0032956	regulation of actin cytoskeleton organization	3/178	127/11595	0.309480792800631	0.570530073870544	gene-swap70a/gene-fmn2a/gene-LOC122861414	3	fmn2a/LOC122861414/swap70a	1	gene-LOC122861414	2
BP	GO:0006612	protein targeting to membrane	1/178	24/11595	0.310413800096843	0.570530073870544	gene-LOC122863926	1	LOC122863926	1	gene-LOC122863926	0
BP	GO:0031214	biomineral tissue development	1/178	24/11595	0.310413800096843	0.570530073870544	gene-pthlha	1	pthlha	0	-	1
BP	GO:0042113	B cell activation	1/178	24/11595	0.310413800096843	0.570530073870544	gene-swap70a	1	swap70a	0	-	1
BP	GO:0055007	cardiac muscle cell differentiation	1/178	24/11595	0.310413800096843	0.570530073870544	gene-pdzph1	1	pdzph1	1	gene-pdzph1	0
BP	GO:0071214	cellular response to abiotic stimulus	1/178	24/11595	0.310413800096843	0.570530073870544	gene-snai2	1	snai2	0	-	1
BP	GO:0104004	cellular response to environmental stimulus	1/178	24/11595	0.310413800096843	0.570530073870544	gene-snai2	1	snai2	0	-	1
BP	GO:0110148	biomineralization	1/178	24/11595	0.310413800096843	0.570530073870544	gene-pthlha	1	pthlha	0	-	1
BP	GO:1901343	negative regulation of vasculature development	1/178	24/11595	0.310413800096843	0.570530073870544	gene-LOC122877917	1	LOC122877917	1	gene-LOC122877917	0
BP	GO:0050790	regulation of catalytic activity	8/178	417/11595	0.310554350976155	0.570530073870544	gene-dok7b/gene-si:dkey-91m11.5/gene-arhgap25/gene-LOC122877917/gene-rasgrp3/gene-arhgap24/gene-rundc1/gene-tbc1d30	8	arhgap24/arhgap25/dok7b/LOC122877917/rasgrp3/rundc1/si:dkey-91m11.5/tbc1d30	5	gene-arhgap25/gene-LOC122877917/gene-rasgrp3/gene-rundc1/gene-tbc1d30	3
BP	GO:0044419	biological process involved in interspecies interaction between organisms	6/178	299/11595	0.310996994680161	0.570530073870544	gene-ptx3a/gene-LOC122881038/gene-LOC122881039/gene-wdfy4/gene-nfkbiaa/gene-LOC122868820	6	LOC122868820/LOC122881038/LOC122881039/nfkbiaa/ptx3a/wdfy4	3	gene-nfkbiaa/gene-ptx3a/gene-wdfy4	3
BP	GO:0051347	positive regulation of transferase activity	2/178	74/11595	0.31465108014127	0.576208283526908	gene-dok7b/gene-LOC122877917	2	dok7b/LOC122877917	1	gene-LOC122877917	1
BP	GO:0099536	synaptic signaling	3/178	129/11595	0.317898255802338	0.581122520801792	gene-nptx1l/gene-htr4/gene-LOC122871213	3	htr4/LOC122871213/nptx1l	1	gene-nptx1l	2
BP	GO:0044770	cell cycle phase transition	2/178	75/11595	0.320308220208617	0.58167588865852	gene-LOC122877917/gene-LOC122865952	2	LOC122865952/LOC122877917	1	gene-LOC122877917	1
BP	GO:0000077	DNA damage checkpoint	1/178	25/11595	0.321021901694178	0.58167588865852	gene-id2a	1	id2a	0	-	1
BP	GO:0043409	negative regulation of MAPK cascade	1/178	25/11595	0.321021901694178	0.58167588865852	gene-LOC122877917	1	LOC122877917	1	gene-LOC122877917	0
BP	GO:0072009	nephron epithelium development	1/178	25/11595	0.321021901694178	0.58167588865852	gene-LOC122865952	1	LOC122865952	0	-	1
BP	GO:1903034	regulation of response to wounding	1/178	25/11595	0.321021901694178	0.58167588865852	gene-LOC122877917	1	LOC122877917	1	gene-LOC122877917	0
BP	GO:0032970	regulation of actin filament-based process	3/178	130/11595	0.322108796923514	0.582621350224811	gene-swap70a/gene-fmn2a/gene-LOC122861414	3	fmn2a/LOC122861414/swap70a	1	gene-LOC122861414	2
BP	GO:0016054	organic acid catabolic process	2/178	76/11595	0.325954211632813	0.583391292015576	gene-ddah1/gene-enosf1	2	ddah1/enosf1	1	gene-enosf1	1
BP	GO:0051146	striated muscle cell differentiation	2/178	76/11595	0.325954211632813	0.583391292015576	gene-myofl/gene-pdzph1	2	myofl/pdzph1	1	gene-pdzph1	1
BP	GO:0009617	response to bacterium	3/178	131/11595	0.326319854492439	0.583391292015576	gene-LOC122881038/gene-LOC122881039/gene-LOC122868820	3	LOC122868820/LOC122881038/LOC122881039	0	-	3
BP	GO:0051258	protein polymerization	3/178	131/11595	0.326319854492439	0.583391292015576	gene-fmn2a/gene-LOC122861414/gene-LOC122867164	3	fmn2a/LOC122861414/LOC122867164	1	gene-LOC122861414	2
BP	GO:0009890	negative regulation of biosynthetic process	5/178	246/11595	0.326731042435726	0.583391292015576	gene-LOC122877917/gene-snai2/gene-id2a/gene-jazf1a/gene-LOC122865952	5	id2a/jazf1a/LOC122865952/LOC122877917/snai2	1	gene-LOC122877917	4
BP	GO:0048666	neuron development	6/178	305/11595	0.327243009931998	0.583391292015576	gene-nptx1l/gene-ndnf/gene-LOC122877917/gene-LOC122888546/gene-LOC122867164/gene-rpgrb	6	LOC122867164/LOC122877917/LOC122888546/ndnf/nptx1l/rpgrb	2	gene-LOC122877917/gene-nptx1l	4
BP	GO:0051172	negative regulation of nitrogen compound metabolic process	6/178	305/11595	0.327243009931998	0.583391292015576	gene-swap70a/gene-LOC122877917/gene-snai2/gene-id2a/gene-jazf1a/gene-LOC122865952	6	id2a/jazf1a/LOC122865952/LOC122877917/snai2/swap70a	1	gene-LOC122877917	5
BP	GO:0032535	regulation of cellular component size	3/178	132/11595	0.330530920603894	0.583391292015576	gene-swap70a/gene-fmn2a/gene-LOC122861414	3	fmn2a/LOC122861414/swap70a	1	gene-LOC122861414	2
BP	GO:0009126	purine nucleoside monophosphate metabolic process	1/178	26/11595	0.331467718591191	0.583391292015576	gene-ampd3a	1	ampd3a	0	-	1
BP	GO:0009167	purine ribonucleoside monophosphate metabolic process	1/178	26/11595	0.331467718591191	0.583391292015576	gene-ampd3a	1	ampd3a	0	-	1
BP	GO:0031056	regulation of histone modification	1/178	26/11595	0.331467718591191	0.583391292015576	gene-snai2	1	snai2	0	-	1
BP	GO:0042398	cellular modified amino acid biosynthetic process	1/178	26/11595	0.331467718591191	0.583391292015576	gene-LOC122874604	1	LOC122874604	0	-	1
BP	GO:0042461	photoreceptor cell development	1/178	26/11595	0.331467718591191	0.583391292015576	gene-rpgrb	1	rpgrb	0	-	1
BP	GO:0043094	cellular metabolic compound salvage	1/178	26/11595	0.331467718591191	0.583391292015576	gene-ampd3a	1	ampd3a	0	-	1
BP	GO:0062197	cellular response to chemical stress	1/178	26/11595	0.331467718591191	0.583391292015576	gene-LOC122877917	1	LOC122877917	1	gene-LOC122877917	0
BP	GO:0008202	steroid metabolic process	2/178	77/11595	0.331588067042801	0.583391292015576	gene-snai2/gene-LOC122871599	2	LOC122871599/snai2	1	gene-LOC122871599	1
BP	GO:0006643	membrane lipid metabolic process	2/178	78/11595	0.337208831659084	0.591188061988283	gene-smpdl3b/gene-LOC122883333	2	LOC122883333/smpdl3b	1	gene-LOC122883333	1
BP	GO:0032984	protein-containing complex disassembly	2/178	78/11595	0.337208831659084	0.591188061988283	gene-swap70a/gene-LOC122886528	2	LOC122886528/swap70a	1	gene-LOC122886528	1
BP	GO:1902903	regulation of supramolecular fiber organization	3/178	134/11595	0.33895108515234	0.591188061988283	gene-swap70a/gene-fmn2a/gene-LOC122861414	3	fmn2a/LOC122861414/swap70a	1	gene-LOC122861414	2
BP	GO:0006874	cellular calcium ion homeostasis	1/178	27/11595	0.341753719636292	0.591188061988283	gene-swap70a	1	swap70a	0	-	1
BP	GO:0009187	cyclic nucleotide metabolic process	1/178	27/11595	0.341753719636292	0.591188061988283	gene-pde4ba	1	pde4ba	0	-	1
BP	GO:0010810	regulation of cell-substrate adhesion	1/178	27/11595	0.341753719636292	0.591188061988283	gene-ndnf	1	ndnf	0	-	1
BP	GO:0031570	DNA integrity checkpoint	1/178	27/11595	0.341753719636292	0.591188061988283	gene-id2a	1	id2a	0	-	1
BP	GO:0032835	glomerulus development	1/178	27/11595	0.341753719636292	0.591188061988283	gene-LOC122865952	1	LOC122865952	0	-	1
BP	GO:0085029	extracellular matrix assembly	1/178	27/11595	0.341753719636292	0.591188061988283	gene-lamb3	1	lamb3	1	gene-lamb3	0
BP	GO:1901214	regulation of neuron death	1/178	27/11595	0.341753719636292	0.591188061988283	gene-ndnf	1	ndnf	0	-	1
BP	GO:0009968	negative regulation of signal transduction	6/178	311/11595	0.343604278495743	0.593393653482598	gene-LOC122877917/gene-LOC122884881/gene-snai2/gene-LOC122865952/gene-nog2/gene-LOC122871826	6	LOC122865952/LOC122871826/LOC122877917/LOC122884881/nog2/snai2	1	gene-LOC122877917	5
BP	GO:0030182	neuron differentiation	7/178	372/11595	0.34616505916185	0.596816347819176	gene-nptx1l/gene-ndnf/gene-LOC122877917/gene-LOC122888546/gene-id2a/gene-LOC122867164/gene-rpgrb	7	id2a/LOC122867164/LOC122877917/LOC122888546/ndnf/nptx1l/rpgrb	2	gene-LOC122877917/gene-nptx1l	5
BP	GO:0030099	myeloid cell differentiation	2/178	80/11595	0.348407427816859	0.598834546058742	gene-zbtb46/gene-lrrc17	2	lrrc17/zbtb46	0	-	2
BP	GO:0010648	negative regulation of cell communication	6/178	313/11595	0.349078139846075	0.598834546058742	gene-LOC122877917/gene-LOC122884881/gene-snai2/gene-LOC122865952/gene-nog2/gene-LOC122871826	6	LOC122865952/LOC122871826/LOC122877917/LOC122884881/nog2/snai2	1	gene-LOC122877917	5
BP	GO:0023057	negative regulation of signaling	6/178	313/11595	0.349078139846075	0.598834546058742	gene-LOC122877917/gene-LOC122884881/gene-snai2/gene-LOC122865952/gene-nog2/gene-LOC122871826	6	LOC122865952/LOC122871826/LOC122877917/LOC122884881/nog2/snai2	1	gene-LOC122877917	5
BP	GO:0035051	cardiocyte differentiation	1/178	28/11595	0.351882336329302	0.599654031000843	gene-pdzph1	1	pdzph1	1	gene-pdzph1	0
BP	GO:0035107	appendage morphogenesis	1/178	28/11595	0.351882336329302	0.599654031000843	gene-itga3b	1	itga3b	1	gene-itga3b	0
BP	GO:0070997	neuron death	1/178	28/11595	0.351882336329302	0.599654031000843	gene-ndnf	1	ndnf	0	-	1
BP	GO:0097193	intrinsic apoptotic signaling pathway	1/178	28/11595	0.351882336329302	0.599654031000843	gene-snai2	1	snai2	0	-	1
BP	GO:0072657	protein localization to membrane	2/178	81/11595	0.353983506010469	0.60092718956158	gene-nptx1l/gene-LOC122863926	2	LOC122863926/nptx1l	2	gene-LOC122863926/gene-nptx1l	0
BP	GO:0009893	positive regulation of metabolic process	9/178	497/11595	0.354296433697742	0.60092718956158	gene-dok7b/gene-ddah1/gene-LOC122877917/gene-rel/gene-LOC122886528/gene-snai2/gene-mef2ca/gene-wbp2/gene-dcn	9	dcn/ddah1/dok7b/LOC122877917/LOC122886528/mef2ca/rel/snai2/wbp2	6	gene-dcn/gene-LOC122877917/gene-LOC122886528/gene-mef2ca/gene-rel/gene-wbp2	3
BP	GO:0031325	positive regulation of cellular metabolic process	8/178	436/11595	0.354378012854938	0.60092718956158	gene-dok7b/gene-ddah1/gene-LOC122877917/gene-rel/gene-LOC122886528/gene-snai2/gene-mef2ca/gene-dcn	8	dcn/ddah1/dok7b/LOC122877917/LOC122886528/mef2ca/rel/snai2	5	gene-dcn/gene-LOC122877917/gene-LOC122886528/gene-mef2ca/gene-rel	3
BP	GO:0033333	fin development	1/178	29/11595	0.361855963383281	0.610594923483082	gene-itga3b	1	itga3b	1	gene-itga3b	0
BP	GO:0072503	cellular divalent inorganic cation homeostasis	1/178	29/11595	0.361855963383281	0.610594923483082	gene-swap70a	1	swap70a	0	-	1
BP	GO:1903037	regulation of leukocyte cell-cell adhesion	1/178	29/11595	0.361855963383281	0.610594923483082	gene-LOC122877917	1	LOC122877917	1	gene-LOC122877917	0
BP	GO:0051056	regulation of small GTPase mediated signal transduction	2/178	83/11595	0.365085062717114	0.61403376779991	gene-arfgef3/gene-LOC122865952	2	arfgef3/LOC122865952	1	gene-arfgef3	1
BP	GO:0060485	mesenchyme development	2/178	83/11595	0.365085062717114	0.61403376779991	gene-snai1a/gene-snai2	2	snai1a/snai2	0	-	2
BP	GO:0060041	retina development in camera-type eye	2/178	84/11595	0.370608963716738	0.617067544308486	gene-id2a/gene-rpgrb	2	id2a/rpgrb	0	-	2
BP	GO:0002011	morphogenesis of an epithelial sheet	1/178	30/11595	0.371676959277953	0.617067544308486	gene-snai2	1	snai2	0	-	1
BP	GO:0007269	neurotransmitter secretion	1/178	30/11595	0.371676959277953	0.617067544308486	gene-LOC122871213	1	LOC122871213	0	-	1
BP	GO:0008037	cell recognition	1/178	30/11595	0.371676959277953	0.617067544308486	gene-LOC122888546	1	LOC122888546	0	-	1
BP	GO:0055074	calcium ion homeostasis	1/178	30/11595	0.371676959277953	0.617067544308486	gene-swap70a	1	swap70a	0	-	1
BP	GO:0099643	signal release from synapse	1/178	30/11595	0.371676959277953	0.617067544308486	gene-LOC122871213	1	LOC122871213	0	-	1
BP	GO:1902275	regulation of chromatin organization	1/178	30/11595	0.371676959277953	0.617067544308486	gene-snai2	1	snai2	0	-	1
BP	GO:2001233	regulation of apoptotic signaling pathway	1/178	30/11595	0.371676959277953	0.617067544308486	gene-snai2	1	snai2	0	-	1
BP	GO:0018193	peptidyl-amino acid modification	3/178	142/11595	0.37253578867668	0.617499032356362	gene-dok7b/gene-ndnf/gene-snai2	3	dok7b/ndnf/snai2	0	-	3
BP	GO:0050673	epithelial cell proliferation	2/178	85/11595	0.376113941247692	0.622429331342489	gene-amotl2a/gene-snai2	2	amotl2a/snai2	0	-	2
BP	GO:0018394	peptidyl-lysine acetylation	1/178	31/11595	0.381347646804847	0.623545548114181	gene-snai2	1	snai2	0	-	1
BP	GO:0030177	positive regulation of Wnt signaling pathway	1/178	31/11595	0.381347646804847	0.623545548114181	gene-tmem198a	1	tmem198a	1	gene-tmem198a	0
BP	GO:0048545	response to steroid hormone	1/178	31/11595	0.381347646804847	0.623545548114181	gene-LOC122865952	1	LOC122865952	0	-	1
BP	GO:0050803	regulation of synapse structure or activity	1/178	31/11595	0.381347646804847	0.623545548114181	gene-nptx1l	1	nptx1l	1	gene-nptx1l	0
BP	GO:0050807	regulation of synapse organization	1/178	31/11595	0.381347646804847	0.623545548114181	gene-nptx1l	1	nptx1l	1	gene-nptx1l	0
BP	GO:0060348	bone development	1/178	31/11595	0.381347646804847	0.623545548114181	gene-lrrc17	1	lrrc17	0	-	1
BP	GO:0042692	muscle cell differentiation	2/178	86/11595	0.381599275225957	0.623545548114181	gene-myofl/gene-pdzph1	2	myofl/pdzph1	1	gene-pdzph1	1
BP	GO:0044087	regulation of cellular component biogenesis	5/178	264/11595	0.381626809757564	0.623545548114181	gene-swap70a/gene-nptx1l/gene-fmn2a/gene-snai2/gene-LOC122861414	5	fmn2a/LOC122861414/nptx1l/snai2/swap70a	2	gene-LOC122861414/gene-nptx1l	3
BP	GO:0061564	axon development	3/178	145/11595	0.385058390466585	0.628156962928875	gene-nptx1l/gene-LOC122877917/gene-LOC122888546	3	LOC122877917/LOC122888546/nptx1l	2	gene-LOC122877917/gene-nptx1l	1
BP	GO:0050727	regulation of inflammatory response	2/178	87/11595	0.387064271865833	0.628685325001592	gene-metrnlb/gene-LOC122868714	2	LOC122868714/metrnlb	1	gene-metrnlb	1
BP	GO:0006470	protein dephosphorylation	1/178	32/11595	0.390870313604288	0.628685325001592	gene-swap70a	1	swap70a	0	-	1
BP	GO:0007159	leukocyte cell-cell adhesion	1/178	32/11595	0.390870313604288	0.628685325001592	gene-LOC122877917	1	LOC122877917	1	gene-LOC122877917	0
BP	GO:0035303	regulation of dephosphorylation	1/178	32/11595	0.390870313604288	0.628685325001592	gene-swap70a	1	swap70a	0	-	1
BP	GO:0043484	regulation of RNA splicing	1/178	32/11595	0.390870313604288	0.628685325001592	gene-rbfox1	1	rbfox1	1	gene-rbfox1	0
BP	GO:0045785	positive regulation of cell adhesion	1/178	32/11595	0.390870313604288	0.628685325001592	gene-ndnf	1	ndnf	0	-	1
BP	GO:0051346	negative regulation of hydrolase activity	1/178	32/11595	0.390870313604288	0.628685325001592	gene-LOC122877917	1	LOC122877917	1	gene-LOC122877917	0
BP	GO:0071897	DNA biosynthetic process	1/178	32/11595	0.390870313604288	0.628685325001592	gene-LOC122877917	1	LOC122877917	1	gene-LOC122877917	0
BP	GO:0072507	divalent inorganic cation homeostasis	1/178	32/11595	0.390870313604288	0.628685325001592	gene-swap70a	1	swap70a	0	-	1
BP	GO:0048732	gland development	2/178	88/11595	0.392508263050235	0.6293561729468	gene-snai2/gene-id2a	2	id2a/snai2	0	-	2
BP	GO:0120035	regulation of plasma membrane bounded cell projection organization	2/178	88/11595	0.392508263050235	0.6293561729468	gene-ndnf/gene-LOC122877917	2	LOC122877917/ndnf	1	gene-LOC122877917	1
BP	GO:0001947	heart looping	1/178	33/11595	0.400247212694354	0.636813080691171	gene-skib	1	skib	0	-	1
BP	GO:0007163	establishment or maintenance of cell polarity	1/178	33/11595	0.400247212694354	0.636813080691171	gene-carmil2	1	carmil2	1	gene-carmil2	0
BP	GO:0010038	response to metal ion	1/178	33/11595	0.400247212694354	0.636813080691171	gene-nptx1l	1	nptx1l	1	gene-nptx1l	0
BP	GO:0014902	myotube differentiation	1/178	33/11595	0.400247212694354	0.636813080691171	gene-myofl	1	myofl	0	-	1
BP	GO:0072073	kidney epithelium development	1/178	33/11595	0.400247212694354	0.636813080691171	gene-LOC122865952	1	LOC122865952	0	-	1
BP	GO:0002449	lymphocyte mediated immunity	1/178	34/11595	0.409480562991916	0.643273629551589	gene-swap70a	1	swap70a	0	-	1
BP	GO:0003407	neural retina development	1/178	34/11595	0.409480562991916	0.643273629551589	gene-rpgrb	1	rpgrb	0	-	1
BP	GO:0009156	ribonucleoside monophosphate biosynthetic process	1/178	34/11595	0.409480562991916	0.643273629551589	gene-ampd3a	1	ampd3a	0	-	1
BP	GO:0033500	carbohydrate homeostasis	1/178	34/11595	0.409480562991916	0.643273629551589	gene-nptx1l	1	nptx1l	1	gene-nptx1l	0
BP	GO:0042593	glucose homeostasis	1/178	34/11595	0.409480562991916	0.643273629551589	gene-nptx1l	1	nptx1l	1	gene-nptx1l	0
BP	GO:0070371	ERK1 and ERK2 cascade	1/178	34/11595	0.409480562991916	0.643273629551589	gene-LOC122877917	1	LOC122877917	1	gene-LOC122877917	0
BP	GO:0070372	regulation of ERK1 and ERK2 cascade	1/178	34/11595	0.409480562991916	0.643273629551589	gene-LOC122877917	1	LOC122877917	1	gene-LOC122877917	0
BP	GO:0001654	eye development	3/178	151/11595	0.409923156755959	0.643273629551589	gene-LOC122877917/gene-id2a/gene-rpgrb	3	id2a/LOC122877917/rpgrb	1	gene-LOC122877917	2
BP	GO:0150063	visual system development	3/178	151/11595	0.409923156755959	0.643273629551589	gene-LOC122877917/gene-id2a/gene-rpgrb	3	id2a/LOC122877917/rpgrb	1	gene-LOC122877917	2
BP	GO:0080135	regulation of cellular response to stress	2/178	92/11595	0.414061675108892	0.64878052741226	gene-LOC122877917/gene-snai2	2	LOC122877917/snai2	1	gene-LOC122877917	1
BP	GO:0080134	regulation of response to stress	4/178	214/11595	0.41743528829759	0.649922136853133	gene-metrnlb/gene-LOC122877917/gene-snai2/gene-LOC122868714	4	LOC122868714/LOC122877917/metrnlb/snai2	2	gene-LOC122877917/gene-metrnlb	2
BP	GO:0006473	protein acetylation	1/178	35/11595	0.418572549825878	0.649922136853133	gene-snai2	1	snai2	0	-	1
BP	GO:0030336	negative regulation of cell migration	1/178	35/11595	0.418572549825878	0.649922136853133	gene-LOC122877917	1	LOC122877917	1	gene-LOC122877917	0
BP	GO:0071375	cellular response to peptide hormone stimulus	1/178	35/11595	0.418572549825878	0.649922136853133	gene-LOC122864683	1	LOC122864683	1	gene-LOC122864683	0
BP	GO:0072006	nephron development	1/178	35/11595	0.418572549825878	0.649922136853133	gene-LOC122865952	1	LOC122865952	0	-	1
BP	GO:1901606	alpha-amino acid catabolic process	1/178	35/11595	0.418572549825878	0.649922136853133	gene-ddah1	1	ddah1	0	-	1
BP	GO:0031344	regulation of cell projection organization	2/178	93/11595	0.419391473193758	0.650214449417691	gene-ndnf/gene-LOC122877917	2	LOC122877917/ndnf	1	gene-LOC122877917	1
BP	GO:0032102	negative regulation of response to external stimulus	2/178	94/11595	0.424696762499923	0.653005348935513	gene-metrnlb/gene-LOC122868714	2	LOC122868714/metrnlb	1	gene-metrnlb	1
BP	GO:0003143	embryonic heart tube morphogenesis	1/178	36/11595	0.427525325442746	0.653005348935513	gene-skib	1	skib	0	-	1
BP	GO:0007623	circadian rhythm	1/178	36/11595	0.427525325442746	0.653005348935513	gene-camk1gb	1	camk1gb	1	gene-camk1gb	0
BP	GO:0010001	glial cell differentiation	1/178	36/11595	0.427525325442746	0.653005348935513	gene-ndrg1a	1	ndrg1a	1	gene-ndrg1a	0
BP	GO:0030835	negative regulation of actin filament depolymerization	1/178	36/11595	0.427525325442746	0.653005348935513	gene-swap70a	1	swap70a	0	-	1
BP	GO:0042246	tissue regeneration	1/178	36/11595	0.427525325442746	0.653005348935513	gene-ccn1	1	ccn1	0	-	1
BP	GO:0051271	negative regulation of cellular component movement	1/178	36/11595	0.427525325442746	0.653005348935513	gene-LOC122877917	1	LOC122877917	1	gene-LOC122877917	0
BP	GO:0051650	establishment of vesicle localization	1/178	36/11595	0.427525325442746	0.653005348935513	gene-LOC122886528	1	LOC122886528	1	gene-LOC122886528	0
BP	GO:0062012	regulation of small molecule metabolic process	1/178	36/11595	0.427525325442746	0.653005348935513	gene-snai2	1	snai2	0	-	1
BP	GO:2000146	negative regulation of cell motility	1/178	36/11595	0.427525325442746	0.653005348935513	gene-LOC122877917	1	LOC122877917	1	gene-LOC122877917	0
BP	GO:0030833	regulation of actin filament polymerization	2/178	96/11595	0.435231815810931	0.653877297673347	gene-fmn2a/gene-LOC122861414	2	fmn2a/LOC122861414	1	gene-LOC122861414	1
BP	GO:0002460	adaptive immune response based on somatic recombination of immune receptors built from immunoglobulin superfamily domains	1/178	37/11595	0.436341009504619	0.653877297673347	gene-swap70a	1	swap70a	0	-	1
BP	GO:0006261	DNA-dependent DNA replication	1/178	37/11595	0.436341009504619	0.653877297673347	gene-LOC122868820	1	LOC122868820	0	-	1
BP	GO:0007009	plasma membrane organization	1/178	37/11595	0.436341009504619	0.653877297673347	gene-ndrg1a	1	ndrg1a	1	gene-ndrg1a	0
BP	GO:0007266	Rho protein signal transduction	1/178	37/11595	0.436341009504619	0.653877297673347	gene-LOC122865952	1	LOC122865952	0	-	1
BP	GO:0009124	nucleoside monophosphate biosynthetic process	1/178	37/11595	0.436341009504619	0.653877297673347	gene-ampd3a	1	ampd3a	0	-	1
BP	GO:0009161	ribonucleoside monophosphate metabolic process	1/178	37/11595	0.436341009504619	0.653877297673347	gene-ampd3a	1	ampd3a	0	-	1
BP	GO:0010970	transport along microtubule	1/178	37/11595	0.436341009504619	0.653877297673347	gene-LOC122886528	1	LOC122886528	1	gene-LOC122886528	0
BP	GO:0030834	regulation of actin filament depolymerization	1/178	37/11595	0.436341009504619	0.653877297673347	gene-swap70a	1	swap70a	0	-	1
BP	GO:0042310	vasoconstriction	1/178	37/11595	0.436341009504619	0.653877297673347	gene-edn1	1	edn1	0	-	1
BP	GO:0048738	cardiac muscle tissue development	1/178	37/11595	0.436341009504619	0.653877297673347	gene-pdzph1	1	pdzph1	1	gene-pdzph1	0
BP	GO:0051098	regulation of binding	1/178	37/11595	0.436341009504619	0.653877297673347	gene-LOC122877917	1	LOC122877917	1	gene-LOC122877917	0
BP	GO:0051648	vesicle localization	1/178	37/11595	0.436341009504619	0.653877297673347	gene-LOC122886528	1	LOC122886528	1	gene-LOC122886528	0
BP	GO:1903047	mitotic cell cycle process	3/178	159/11595	0.44258550649607	0.659223241253326	gene-LOC122877917/gene-id2a/gene-LOC122865952	3	id2a/LOC122865952/LOC122877917	1	gene-LOC122877917	2
BP	GO:0001505	regulation of neurotransmitter levels	1/178	38/11595	0.445021689579734	0.659223241253326	gene-LOC122871213	1	LOC122871213	0	-	1
BP	GO:0002443	leukocyte mediated immunity	1/178	38/11595	0.445021689579734	0.659223241253326	gene-swap70a	1	swap70a	0	-	1
BP	GO:0016236	macroautophagy	1/178	38/11595	0.445021689579734	0.659223241253326	gene-LOC122886528	1	LOC122886528	1	gene-LOC122886528	0
BP	GO:0019216	regulation of lipid metabolic process	1/178	38/11595	0.445021689579734	0.659223241253326	gene-snai2	1	snai2	0	-	1
BP	GO:0045664	regulation of neuron differentiation	1/178	38/11595	0.445021689579734	0.659223241253326	gene-id2a	1	id2a	0	-	1
BP	GO:0090257	regulation of muscle system process	1/178	38/11595	0.445021689579734	0.659223241253326	gene-LOC122877917	1	LOC122877917	1	gene-LOC122877917	0
BP	GO:0002683	negative regulation of immune system process	2/178	98/11595	0.445663044765828	0.659223241253326	gene-zbtb46/gene-lrrc17	2	lrrc17/zbtb46	0	-	2
BP	GO:0002684	positive regulation of immune system process	2/178	98/11595	0.445663044765828	0.659223241253326	gene-swap70a/gene-zbtb46	2	swap70a/zbtb46	0	-	2
BP	GO:0032270	positive regulation of cellular protein metabolic process	3/178	160/11595	0.44662133844932	0.659694269256804	gene-dok7b/gene-LOC122877917/gene-snai2	3	dok7b/LOC122877917/snai2	1	gene-LOC122877917	2
BP	GO:0031324	negative regulation of cellular metabolic process	6/178	349/11595	0.447925012035199	0.660673372544048	gene-swap70a/gene-LOC122877917/gene-snai2/gene-id2a/gene-jazf1a/gene-LOC122865952	6	id2a/jazf1a/LOC122865952/LOC122877917/snai2/swap70a	1	gene-LOC122877917	5
BP	GO:0090596	sensory organ morphogenesis	2/178	99/11595	0.450838628806372	0.663305069072424	gene-id2a/gene-rpgrb	2	id2a/rpgrb	0	-	2
BP	GO:0007160	cell-matrix adhesion	1/178	39/11595	0.453569421625663	0.663305069072424	gene-parvb	1	parvb	1	gene-parvb	0
BP	GO:0009913	epidermal cell differentiation	1/178	39/11595	0.453569421625663	0.663305069072424	gene-LOC122877917	1	LOC122877917	1	gene-LOC122877917	0
BP	GO:0060042	retina morphogenesis in camera-type eye	1/178	39/11595	0.453569421625663	0.663305069072424	gene-rpgrb	1	rpgrb	0	-	1
BP	GO:1901136	carbohydrate derivative catabolic process	1/178	39/11595	0.453569421625663	0.663305069072424	gene-pde4ba	1	pde4ba	0	-	1
BP	GO:1902115	regulation of organelle assembly	1/178	39/11595	0.453569421625663	0.663305069072424	gene-nptx1l	1	nptx1l	1	gene-nptx1l	0
BP	GO:0030855	epithelial cell differentiation	2/178	100/11595	0.455986979894379	0.665896000384001	gene-LOC122877917/gene-LOC122865952	2	LOC122865952/LOC122877917	1	gene-LOC122877917	1
BP	GO:0009314	response to radiation	2/178	101/11595	0.461107711874041	0.668971634283295	gene-tafa3a/gene-snai2	2	snai2/tafa3a	1	gene-tafa3a	1
BP	GO:0009611	response to wounding	2/178	101/11595	0.461107711874041	0.668971634283295	gene-LOC122877917/gene-snai2	2	LOC122877917/snai2	1	gene-LOC122877917	1
BP	GO:0034404	nucleobase-containing small molecule biosynthetic process	1/178	40/11595	0.461986230465282	0.668971634283295	gene-pde4ba	1	pde4ba	0	-	1
BP	GO:0042063	gliogenesis	1/178	40/11595	0.461986230465282	0.668971634283295	gene-ndrg1a	1	ndrg1a	1	gene-ndrg1a	0
BP	GO:0044344	cellular response to fibroblast growth factor stimulus	1/178	40/11595	0.461986230465282	0.668971634283295	gene-ndnf	1	ndnf	0	-	1
BP	GO:2001020	regulation of response to DNA damage stimulus	1/178	40/11595	0.461986230465282	0.668971634283295	gene-snai2	1	snai2	0	-	1
BP	GO:0051247	positive regulation of protein metabolic process	3/178	165/11595	0.466622940080304	0.673406399546567	gene-dok7b/gene-LOC122877917/gene-snai2	3	dok7b/LOC122877917/snai2	1	gene-LOC122877917	2
BP	GO:0009123	nucleoside monophosphate metabolic process	1/178	41/11595	0.470274110255605	0.673406399546567	gene-ampd3a	1	ampd3a	0	-	1
BP	GO:0016485	protein processing	1/178	41/11595	0.470274110255605	0.673406399546567	gene-LOC122871823	1	LOC122871823	0	-	1
BP	GO:0031346	positive regulation of cell projection organization	1/178	41/11595	0.470274110255605	0.673406399546567	gene-ndnf	1	ndnf	0	-	1
BP	GO:0043434	response to peptide hormone	1/178	41/11595	0.470274110255605	0.673406399546567	gene-LOC122864683	1	LOC122864683	1	gene-LOC122864683	0
BP	GO:0043473	pigmentation	1/178	41/11595	0.470274110255605	0.673406399546567	gene-snai2	1	snai2	0	-	1
BP	GO:0048736	appendage development	1/178	41/11595	0.470274110255605	0.673406399546567	gene-itga3b	1	itga3b	1	gene-itga3b	0
BP	GO:0071774	response to fibroblast growth factor	1/178	41/11595	0.470274110255605	0.673406399546567	gene-ndnf	1	ndnf	0	-	1
BP	GO:0031347	regulation of defense response	2/178	103/11595	0.471264863961428	0.67388914666329	gene-metrnlb/gene-LOC122868714	2	LOC122868714/metrnlb	1	gene-metrnlb	1
BP	GO:0007610	behavior	2/178	104/11595	0.476300600465787	0.674835424789427	gene-tafa3a/gene-camk1gb	2	camk1gb/tafa3a	2	gene-camk1gb/gene-tafa3a	0
BP	GO:0010243	response to organonitrogen compound	2/178	104/11595	0.476300600465787	0.674835424789427	gene-LOC122864683/gene-LOC122877917	2	LOC122864683/LOC122877917	2	gene-LOC122864683/gene-LOC122877917	0
BP	GO:0032269	negative regulation of cellular protein metabolic process	2/178	104/11595	0.476300600465787	0.674835424789427	gene-swap70a/gene-LOC122877917	2	LOC122877917/swap70a	1	gene-LOC122877917	1
BP	GO:0032271	regulation of protein polymerization	2/178	104/11595	0.476300600465787	0.674835424789427	gene-fmn2a/gene-LOC122861414	2	fmn2a/LOC122861414	1	gene-LOC122861414	1
BP	GO:0044282	small molecule catabolic process	2/178	104/11595	0.476300600465787	0.674835424789427	gene-ddah1/gene-enosf1	2	ddah1/enosf1	1	gene-enosf1	1
BP	GO:0051248	negative regulation of protein metabolic process	2/178	104/11595	0.476300600465787	0.674835424789427	gene-swap70a/gene-LOC122877917	2	LOC122877917/swap70a	1	gene-LOC122877917	1
BP	GO:0019835	cytolysis	1/178	42/11595	0.478435024949607	0.674835424789427	gene-prf1.5	1	prf1.5	1	gene-prf1.5	0
BP	GO:0033044	regulation of chromosome organization	1/178	42/11595	0.478435024949607	0.674835424789427	gene-snai2	1	snai2	0	-	1
BP	GO:0090150	establishment of protein localization to membrane	1/178	42/11595	0.478435024949607	0.674835424789427	gene-LOC122863926	1	LOC122863926	1	gene-LOC122863926	0
BP	GO:0006644	phospholipid metabolic process	3/178	168/11595	0.478472061611126	0.674835424789427	gene-zgc:77375/gene-plpp3/gene-smpdl3b	3	plpp3/smpdl3b/zgc:77375	0	-	3
BP	GO:0061024	membrane organization	2/178	106/11595	0.486284811743726	0.680520107111366	gene-LOC122863926/gene-ndrg1a	2	LOC122863926/ndrg1a	2	gene-LOC122863926/gene-ndrg1a	0
BP	GO:0009064	glutamine family amino acid metabolic process	1/178	43/11595	0.486470908751128	0.680520107111366	gene-ddah1	1	ddah1	0	-	1
BP	GO:0014031	mesenchymal cell development	1/178	43/11595	0.486470908751128	0.680520107111366	gene-snai2	1	snai2	0	-	1
BP	GO:0014032	neural crest cell development	1/178	43/11595	0.486470908751128	0.680520107111366	gene-snai2	1	snai2	0	-	1
BP	GO:0048864	stem cell development	1/178	43/11595	0.486470908751128	0.680520107111366	gene-snai2	1	snai2	0	-	1
BP	GO:0042592	homeostatic process	5/178	299/11595	0.48718193108932	0.680520107111366	gene-swap70a/gene-nptx1l/gene-LOC122881038/gene-LOC122881039/gene-LOC122868714	5	LOC122868714/LOC122881038/LOC122881039/nptx1l/swap70a	1	gene-nptx1l	4
BP	GO:0051726	regulation of cell cycle	4/178	235/11595	0.488689278655486	0.680520107111366	gene-LOC122877917/gene-id2a/gene-LOC122865952/gene-LOC122868820	4	id2a/LOC122865952/LOC122868820/LOC122877917	1	gene-LOC122877917	3
BP	GO:0048812	neuron projection morphogenesis	3/178	171/11595	0.490198960713399	0.680520107111366	gene-nptx1l/gene-LOC122888546/gene-LOC122867164	3	LOC122867164/LOC122888546/nptx1l	1	gene-nptx1l	2
BP	GO:0120039	plasma membrane bounded cell projection morphogenesis	3/178	171/11595	0.490198960713399	0.680520107111366	gene-nptx1l/gene-LOC122888546/gene-LOC122867164	3	LOC122867164/LOC122888546/nptx1l	1	gene-nptx1l	2
BP	GO:0010628	positive regulation of gene expression	2/178	107/11595	0.491232702189797	0.680520107111366	gene-LOC122877917/gene-wbp2	2	LOC122877917/wbp2	2	gene-LOC122877917/gene-wbp2	0
BP	GO:0050877	nervous system process	4/178	236/11595	0.492001187622264	0.680520107111366	gene-tafa3a/gene-nptx1l/gene-snai2/gene-LOC122863926	4	LOC122863926/nptx1l/snai2/tafa3a	3	gene-LOC122863926/gene-nptx1l/gene-tafa3a	1
BP	GO:0007018	microtubule-based movement	3/178	172/11595	0.494079674110892	0.680520107111366	gene-LOC122886528/gene-kif26bb/gene-rpgrb	3	kif26bb/LOC122886528/rpgrb	2	gene-kif26bb/gene-LOC122886528	1
BP	GO:0048858	cell projection morphogenesis	3/178	172/11595	0.494079674110892	0.680520107111366	gene-nptx1l/gene-LOC122888546/gene-LOC122867164	3	LOC122867164/LOC122888546/nptx1l	1	gene-nptx1l	2
BP	GO:0000075	cell cycle checkpoint	1/178	44/11595	0.494383666562961	0.680520107111366	gene-id2a	1	id2a	0	-	1
BP	GO:0030042	actin filament depolymerization	1/178	44/11595	0.494383666562961	0.680520107111366	gene-swap70a	1	swap70a	0	-	1
BP	GO:0040013	negative regulation of locomotion	1/178	44/11595	0.494383666562961	0.680520107111366	gene-LOC122877917	1	LOC122877917	1	gene-LOC122877917	0
BP	GO:0043543	protein acylation	1/178	44/11595	0.494383666562961	0.680520107111366	gene-snai2	1	snai2	0	-	1
BP	GO:0051302	regulation of cell division	1/178	44/11595	0.494383666562961	0.680520107111366	gene-tgfb3	1	tgfb3	0	-	1
BP	GO:0120036	plasma membrane bounded cell projection organization	7/178	434/11595	0.501624040997788	0.686661279622695	gene-nptx1l/gene-ndnf/gene-amotl2a/gene-LOC122877917/gene-LOC122888546/gene-LOC122867164/gene-rpgrb	7	amotl2a/LOC122867164/LOC122877917/LOC122888546/ndnf/nptx1l/rpgrb	2	gene-LOC122877917/gene-nptx1l	5
BP	GO:0032990	cell part morphogenesis	3/178	174/11595	0.501797398706371	0.686661279622695	gene-nptx1l/gene-LOC122888546/gene-LOC122867164	3	LOC122867164/LOC122888546/nptx1l	1	gene-nptx1l	2
BP	GO:0007626	locomotory behavior	1/178	45/11595	0.502175174428236	0.686661279622695	gene-camk1gb	1	camk1gb	1	gene-camk1gb	0
BP	GO:0035050	embryonic heart tube development	1/178	45/11595	0.502175174428236	0.686661279622695	gene-skib	1	skib	0	-	1
BP	GO:0045860	positive regulation of protein kinase activity	1/178	45/11595	0.502175174428236	0.686661279622695	gene-dok7b	1	dok7b	0	-	1
BP	GO:0044242	cellular lipid catabolic process	1/178	46/11595	0.509847279965187	0.696228537276963	gene-smpdl3b	1	smpdl3b	0	-	1
BP	GO:0051338	regulation of transferase activity	2/178	111/11595	0.510723398285734	0.696502412212423	gene-dok7b/gene-LOC122877917	2	dok7b/LOC122877917	1	gene-LOC122877917	1
BP	GO:0051493	regulation of cytoskeleton organization	3/178	177/11595	0.513261622432242	0.699039277051045	gene-swap70a/gene-fmn2a/gene-LOC122861414	3	fmn2a/LOC122861414/swap70a	1	gene-LOC122861414	2
BP	GO:1901698	response to nitrogen compound	2/178	112/11595	0.515519696224945	0.700054145252051	gene-LOC122864683/gene-LOC122877917	2	LOC122864683/LOC122877917	2	gene-LOC122864683/gene-LOC122877917	0
BP	GO:0014033	neural crest cell differentiation	1/178	47/11595	0.517401802795405	0.700054145252051	gene-snai2	1	snai2	0	-	1
BP	GO:0046474	glycerophospholipid biosynthetic process	1/178	47/11595	0.517401802795405	0.700054145252051	gene-zgc:77375	1	zgc:77375	0	-	1
BP	GO:0051052	regulation of DNA metabolic process	1/178	47/11595	0.517401802795405	0.700054145252051	gene-LOC122877917	1	LOC122877917	1	gene-LOC122877917	0
BP	GO:1901880	negative regulation of protein depolymerization	1/178	47/11595	0.517401802795405	0.700054145252051	gene-swap70a	1	swap70a	0	-	1
BP	GO:0002064	epithelial cell development	1/178	48/11595	0.524840534965687	0.702068492782934	gene-LOC122865952	1	LOC122865952	0	-	1
BP	GO:0016052	carbohydrate catabolic process	1/178	48/11595	0.524840534965687	0.702068492782934	gene-enosf1	1	enosf1	1	gene-enosf1	0
BP	GO:0021953	central nervous system neuron differentiation	1/178	48/11595	0.524840534965687	0.702068492782934	gene-ndnf	1	ndnf	0	-	1
BP	GO:0035150	regulation of tube size	1/178	48/11595	0.524840534965687	0.702068492782934	gene-edn1	1	edn1	0	-	1
BP	GO:0035296	regulation of tube diameter	1/178	48/11595	0.524840534965687	0.702068492782934	gene-edn1	1	edn1	0	-	1
BP	GO:0050804	modulation of chemical synaptic transmission	1/178	48/11595	0.524840534965687	0.702068492782934	gene-nptx1l	1	nptx1l	1	gene-nptx1l	0
BP	GO:0097746	blood vessel diameter maintenance	1/178	48/11595	0.524840534965687	0.702068492782934	gene-edn1	1	edn1	0	-	1
BP	GO:0099177	regulation of trans-synaptic signaling	1/178	48/11595	0.524840534965687	0.702068492782934	gene-nptx1l	1	nptx1l	1	gene-nptx1l	0
BP	GO:0003002	regionalization	2/178	114/11595	0.525019212352708	0.702068492782934	gene-skib/gene-snai1a	2	skib/snai1a	0	-	2
BP	GO:0006836	neurotransmitter transport	1/178	49/11595	0.532165241363549	0.707951437220412	gene-LOC122871213	1	LOC122871213	0	-	1
BP	GO:0033674	positive regulation of kinase activity	1/178	49/11595	0.532165241363549	0.707951437220412	gene-dok7b	1	dok7b	0	-	1
BP	GO:0043242	negative regulation of protein-containing complex disassembly	1/178	49/11595	0.532165241363549	0.707951437220412	gene-swap70a	1	swap70a	0	-	1
BP	GO:0045765	regulation of angiogenesis	1/178	49/11595	0.532165241363549	0.707951437220412	gene-LOC122877917	1	LOC122877917	1	gene-LOC122877917	0
BP	GO:0048880	sensory system development	3/178	183/11595	0.535766745284277	0.711824116479497	gene-LOC122877917/gene-id2a/gene-rpgrb	3	id2a/LOC122877917/rpgrb	1	gene-LOC122877917	2
BP	GO:0046649	lymphocyte activation	2/178	117/11595	0.539033218620615	0.712033761319391	gene-swap70a/gene-wdfy4	2	swap70a/wdfy4	1	gene-wdfy4	1
BP	GO:0003018	vascular process in circulatory system	1/178	50/11595	0.539377660126522	0.712033761319391	gene-edn1	1	edn1	0	-	1
BP	GO:0014067	negative regulation of phosphatidylinositol 3-kinase signaling	1/178	50/11595	0.539377660126522	0.712033761319391	gene-LOC122877917	1	LOC122877917	1	gene-LOC122877917	0
BP	GO:1901879	regulation of protein depolymerization	1/178	50/11595	0.539377660126522	0.712033761319391	gene-swap70a	1	swap70a	0	-	1
BP	GO:1990778	protein localization to cell periphery	1/178	50/11595	0.539377660126522	0.712033761319391	gene-nptx1l	1	nptx1l	1	gene-nptx1l	0
BP	GO:0000904	cell morphogenesis involved in differentiation	3/178	185/11595	0.543137973506119	0.716080883228655	gene-lamb3/gene-nptx1l/gene-LOC122888546	3	lamb3/LOC122888546/nptx1l	2	gene-lamb3/gene-nptx1l	1
BP	GO:0001889	liver development	1/178	51/11595	0.546479503045316	0.718648428111889	gene-id2a	1	id2a	0	-	1
BP	GO:0030705	cytoskeleton-dependent intracellular transport	1/178	51/11595	0.546479503045316	0.718648428111889	gene-LOC122886528	1	LOC122886528	1	gene-LOC122886528	0
BP	GO:0031401	positive regulation of protein modification process	2/178	119/11595	0.548217333316633	0.720015376623502	gene-dok7b/gene-snai2	2	dok7b/snai2	0	-	2
BP	GO:1902531	regulation of intracellular signal transduction	5/178	321/11595	0.550328492560637	0.72049255315117	gene-uacab/gene-LOC122877917/gene-arfgef3/gene-snai2/gene-LOC122865952	5	arfgef3/LOC122865952/LOC122877917/snai2/uacab	2	gene-arfgef3/gene-LOC122877917	3
BP	GO:0003341	cilium movement	1/178	52/11595	0.553472455960938	0.72049255315117	gene-rpgrb	1	rpgrb	0	-	1
BP	GO:0007605	sensory perception of sound	1/178	52/11595	0.553472455960938	0.72049255315117	gene-snai2	1	snai2	0	-	1
BP	GO:0045017	glycerolipid biosynthetic process	1/178	52/11595	0.553472455960938	0.72049255315117	gene-zgc:77375	1	zgc:77375	0	-	1
BP	GO:0061008	hepaticobiliary system development	1/178	52/11595	0.553472455960938	0.72049255315117	gene-id2a	1	id2a	0	-	1
BP	GO:1901342	regulation of vasculature development	1/178	52/11595	0.553472455960938	0.72049255315117	gene-LOC122877917	1	LOC122877917	1	gene-LOC122877917	0
BP	GO:1903131	mononuclear cell differentiation	1/178	52/11595	0.553472455960938	0.72049255315117	gene-zbtb46	1	zbtb46	0	-	1
BP	GO:0008544	epidermis development	1/178	53/11595	0.560358179155857	0.724879903023449	gene-LOC122877917	1	LOC122877917	1	gene-LOC122877917	0
BP	GO:0044272	sulfur compound biosynthetic process	1/178	53/11595	0.560358179155857	0.724879903023449	gene-LOC122876938	1	LOC122876938	1	gene-LOC122876938	0
BP	GO:0048701	embryonic cranial skeleton morphogenesis	1/178	53/11595	0.560358179155857	0.724879903023449	gene-pthlha	1	pthlha	0	-	1
BP	GO:0048704	embryonic skeletal system morphogenesis	1/178	53/11595	0.560358179155857	0.724879903023449	gene-pthlha	1	pthlha	0	-	1
BP	GO:0051321	meiotic cell cycle	1/178	53/11595	0.560358179155857	0.724879903023449	gene-tex11	1	tex11	0	-	1
BP	GO:0048562	embryonic organ morphogenesis	2/178	123/11595	0.566200887913378	0.730899494099041	gene-skib/gene-pthlha	2	pthlha/skib	0	-	2
BP	GO:0030162	regulation of proteolysis	1/178	54/11595	0.567138307739314	0.730899494099041	gene-LOC122877917	1	LOC122877917	1	gene-LOC122877917	0
BP	GO:0050954	sensory perception of mechanical stimulus	1/178	54/11595	0.567138307739314	0.730899494099041	gene-snai2	1	snai2	0	-	1
BP	GO:0002250	adaptive immune response	1/178	55/11595	0.573814452026845	0.738580149862269	gene-swap70a	1	swap70a	0	-	1
BP	GO:0048593	camera-type eye morphogenesis	1/178	56/11595	0.580388197914126	0.74425401996202	gene-rpgrb	1	rpgrb	0	-	1
BP	GO:0051604	protein maturation	1/178	56/11595	0.580388197914126	0.74425401996202	gene-LOC122871823	1	LOC122871823	0	-	1
BP	GO:0061371	determination of heart left/right asymmetry	1/178	56/11595	0.580388197914126	0.74425401996202	gene-skib	1	skib	0	-	1
BP	GO:0048589	developmental growth	2/178	127/11595	0.583667242911454	0.74752910241206	gene-ccn1/gene-dcn	2	ccn1/dcn	1	gene-dcn	1
BP	GO:0023061	signal release	1/178	57/11595	0.586861107245202	0.749294372013862	gene-LOC122871213	1	LOC122871213	0	-	1
BP	GO:0060560	developmental growth involved in morphogenesis	1/178	57/11595	0.586861107245202	0.749294372013862	gene-dcn	1	dcn	1	gene-dcn	0
BP	GO:0001816	cytokine production	2/178	128/11595	0.587952615867327	0.749294372013862	gene-LOC122877917/gene-snai2	2	LOC122877917/snai2	1	gene-LOC122877917	1
BP	GO:0001817	regulation of cytokine production	2/178	128/11595	0.587952615867327	0.749294372013862	gene-LOC122877917/gene-snai2	2	LOC122877917/snai2	1	gene-LOC122877917	1
BP	GO:0006302	double-strand break repair	1/178	58/11595	0.593234718175203	0.755092585726709	gene-LOC122871826	1	LOC122871826	0	-	1
BP	GO:0000278	mitotic cell cycle	3/178	200/11595	0.596207008241229	0.755098517124237	gene-LOC122877917/gene-id2a/gene-LOC122865952	3	id2a/LOC122865952/LOC122877917	1	gene-LOC122877917	2
BP	GO:0008610	lipid biosynthetic process	3/178	200/11595	0.596207008241229	0.755098517124237	gene-zgc:77375/gene-snai2/gene-LOC122871599	3	LOC122871599/snai2/zgc:77375	1	gene-LOC122871599	2
BP	GO:0030030	cell projection organization	7/178	475/11595	0.598080750922636	0.755098517124237	gene-nptx1l/gene-ndnf/gene-amotl2a/gene-LOC122877917/gene-LOC122888546/gene-LOC122867164/gene-rpgrb	7	amotl2a/LOC122867164/LOC122877917/LOC122888546/ndnf/nptx1l/rpgrb	2	gene-LOC122877917/gene-nptx1l	5
BP	GO:0031328	positive regulation of cellular biosynthetic process	4/178	270/11595	0.598502505454803	0.755098517124237	gene-ddah1/gene-LOC122877917/gene-rel/gene-mef2ca	4	ddah1/LOC122877917/mef2ca/rel	3	gene-LOC122877917/gene-mef2ca/gene-rel	1
BP	GO:0048871	multicellular organismal homeostasis	1/178	59/11595	0.599510545527619	0.755098517124237	gene-LOC122868714	1	LOC122868714	0	-	1
BP	GO:0050680	negative regulation of epithelial cell proliferation	1/178	59/11595	0.599510545527619	0.755098517124237	gene-snai2	1	snai2	0	-	1
BP	GO:0051606	detection of stimulus	1/178	59/11595	0.599510545527619	0.755098517124237	gene-LOC122863926	1	LOC122863926	1	gene-LOC122863926	0
BP	GO:0006869	lipid transport	2/178	131/11595	0.600613388024999	0.755098517124237	gene-LOC122865700/gene-osbp2a	2	LOC122865700/osbp2a	2	gene-LOC122865700/gene-osbp2a	0
BP	GO:1901615	organic hydroxy compound metabolic process	2/178	131/11595	0.600613388024999	0.755098517124237	gene-snai2/gene-LOC122871599	2	LOC122871599/snai2	1	gene-LOC122871599	1
BP	GO:0032989	cellular component morphogenesis	3/178	202/11595	0.60297578091096	0.755098517124237	gene-nptx1l/gene-LOC122888546/gene-LOC122867164	3	LOC122867164/LOC122888546/nptx1l	1	gene-nptx1l	2
BP	GO:1902532	negative regulation of intracellular signal transduction	2/178	132/11595	0.604768502908401	0.755098517124237	gene-LOC122877917/gene-snai2	2	LOC122877917/snai2	1	gene-LOC122877917	1
BP	GO:0010563	negative regulation of phosphorus metabolic process	1/178	60/11595	0.605690081146211	0.755098517124237	gene-swap70a	1	swap70a	0	-	1
BP	GO:0031503	protein-containing complex localization	1/178	60/11595	0.605690081146211	0.755098517124237	gene-nptx1l	1	nptx1l	1	gene-nptx1l	0
BP	GO:0032088	negative regulation of NF-kappaB transcription factor activity	1/178	60/11595	0.605690081146211	0.755098517124237	gene-LOC122877917	1	LOC122877917	1	gene-LOC122877917	0
BP	GO:0043086	negative regulation of catalytic activity	1/178	60/11595	0.605690081146211	0.755098517124237	gene-LOC122877917	1	LOC122877917	1	gene-LOC122877917	0
BP	GO:0045936	negative regulation of phosphate metabolic process	1/178	60/11595	0.605690081146211	0.755098517124237	gene-swap70a	1	swap70a	0	-	1
BP	GO:0051261	protein depolymerization	1/178	60/11595	0.605690081146211	0.755098517124237	gene-swap70a	1	swap70a	0	-	1
BP	GO:0051173	positive regulation of nitrogen compound metabolic process	6/178	411/11595	0.607771521348525	0.756778307379624	gene-dok7b/gene-ddah1/gene-LOC122877917/gene-rel/gene-snai2/gene-mef2ca	6	ddah1/dok7b/LOC122877917/mef2ca/rel/snai2	3	gene-LOC122877917/gene-mef2ca/gene-rel	3
BP	GO:0007409	axonogenesis	2/178	133/11595	0.608891052647217	0.757257750638457	gene-nptx1l/gene-LOC122888546	2	LOC122888546/nptx1l	1	gene-nptx1l	1
BP	GO:0014066	regulation of phosphatidylinositol 3-kinase signaling	1/178	61/11595	0.611774794241658	0.758100736614362	gene-LOC122877917	1	LOC122877917	1	gene-LOC122877917	0
BP	GO:0030900	forebrain development	1/178	61/11595	0.611774794241658	0.758100736614362	gene-ndnf	1	ndnf	0	-	1
BP	GO:0072330	monocarboxylic acid biosynthetic process	1/178	61/11595	0.611774794241658	0.758100736614362	gene-LOC122871599	1	LOC122871599	1	gene-LOC122871599	0
BP	GO:0006790	sulfur compound metabolic process	2/178	134/11595	0.612981052154715	0.758683631178285	gene-LOC122876938/gene-ndnf	2	LOC122876938/ndnf	1	gene-LOC122876938	1
BP	GO:0043065	positive regulation of apoptotic process	1/178	62/11595	0.617766131732986	0.761862298823815	gene-phlda1	1	phlda1	0	-	1
BP	GO:0043068	positive regulation of programmed cell death	1/178	62/11595	0.617766131732986	0.761862298823815	gene-phlda1	1	phlda1	0	-	1
BP	GO:0043433	negative regulation of DNA-binding transcription factor activity	1/178	62/11595	0.617766131732986	0.761862298823815	gene-LOC122877917	1	LOC122877917	1	gene-LOC122877917	0
BP	GO:0009891	positive regulation of biosynthetic process	4/178	277/11595	0.618734709375159	0.7621451438062	gene-ddah1/gene-LOC122877917/gene-rel/gene-mef2ca	4	ddah1/LOC122877917/mef2ca/rel	3	gene-LOC122877917/gene-mef2ca/gene-rel	1
BP	GO:0008284	positive regulation of cell population proliferation	1/178	63/11595	0.623665518583895	0.765475178166661	gene-fgfr3	1	fgfr3	0	-	1
BP	GO:0048706	embryonic skeletal system development	1/178	63/11595	0.623665518583895	0.765475178166661	gene-pthlha	1	pthlha	0	-	1
BP	GO:1904888	cranial skeletal system development	1/178	63/11595	0.623665518583895	0.765475178166661	gene-pthlha	1	pthlha	0	-	1
BP	GO:0043009	chordate embryonic development	3/178	210/11595	0.629301652091167	0.770769671301873	gene-LOC122877917/gene-rundc1/gene-pthlha	3	LOC122877917/pthlha/rundc1	2	gene-LOC122877917/gene-rundc1	1
BP	GO:0006979	response to oxidative stress	1/178	64/11595	0.629474358134022	0.770769671301873	gene-LOC122877917	1	LOC122877917	1	gene-LOC122877917	0
BP	GO:0009792	embryo development ending in birth or egg hatching	3/178	211/11595	0.63250720474262	0.77135350658698	gene-LOC122877917/gene-rundc1/gene-pthlha	3	LOC122877917/pthlha/rundc1	2	gene-LOC122877917/gene-rundc1	1
BP	GO:0010876	lipid localization	2/178	139/11595	0.632943808508812	0.77135350658698	gene-LOC122865700/gene-osbp2a	2	LOC122865700/osbp2a	2	gene-LOC122865700/gene-osbp2a	0
BP	GO:0051240	positive regulation of multicellular organismal process	2/178	139/11595	0.632943808508812	0.77135350658698	gene-LOC122877917/gene-zbtb46	2	LOC122877917/zbtb46	1	gene-LOC122877917	1
BP	GO:0061061	muscle structure development	2/178	139/11595	0.632943808508812	0.77135350658698	gene-myofl/gene-pdzph1	2	myofl/pdzph1	1	gene-pdzph1	1
BP	GO:0032940	secretion by cell	2/178	141/11595	0.640702347931917	0.773643449064782	gene-si:dkey-196h17.9/gene-LOC122871213	2	LOC122871213/si:dkey-196h17.9	1	gene-si:dkey-196h17.9	1
BP	GO:0010942	positive regulation of cell death	1/178	66/11595	0.640825902523108	0.773643449064782	gene-phlda1	1	phlda1	0	-	1
BP	GO:0014065	phosphatidylinositol 3-kinase signaling	1/178	66/11595	0.640825902523108	0.773643449064782	gene-LOC122877917	1	LOC122877917	1	gene-LOC122877917	0
BP	GO:0031400	negative regulation of protein modification process	1/178	66/11595	0.640825902523108	0.773643449064782	gene-swap70a	1	swap70a	0	-	1
BP	GO:0043624	cellular protein complex disassembly	1/178	66/11595	0.640825902523108	0.773643449064782	gene-swap70a	1	swap70a	0	-	1
BP	GO:0051494	negative regulation of cytoskeleton organization	1/178	66/11595	0.640825902523108	0.773643449064782	gene-swap70a	1	swap70a	0	-	1
BP	GO:1901222	regulation of NIK/NF-kappaB signaling	1/178	66/11595	0.640825902523108	0.773643449064782	gene-uacab	1	uacab	0	-	1
BP	GO:1902904	negative regulation of supramolecular fiber organization	1/178	66/11595	0.640825902523108	0.773643449064782	gene-swap70a	1	swap70a	0	-	1
BP	GO:0006397	mRNA processing	3/178	215/11595	0.645138357493254	0.777606557067903	gene-cpeb1b/gene-celf5a/gene-rbfox1	3	celf5a/cpeb1b/rbfox1	2	gene-cpeb1b/gene-rbfox1	1
BP	GO:0008654	phospholipid biosynthetic process	1/178	67/11595	0.646371308833359	0.777606557067903	gene-zgc:77375	1	zgc:77375	0	-	1
BP	GO:0048705	skeletal system morphogenesis	1/178	67/11595	0.646371308833359	0.777606557067903	gene-pthlha	1	pthlha	0	-	1
BP	GO:0140352	export from cell	2/178	143/11595	0.648332131158945	0.779056441987031	gene-si:dkey-196h17.9/gene-LOC122871213	2	LOC122871213/si:dkey-196h17.9	1	gene-si:dkey-196h17.9	1
BP	GO:0006886	intracellular protein transport	5/178	361/11595	0.654555345699303	0.785450618603026	gene-rab3ab/gene-tsnare1/gene-LOC122863926/gene-rundc1/gene-tbc1d30	5	LOC122863926/rab3ab/rundc1/tbc1d30/tsnare1	4	gene-LOC122863926/gene-rundc1/gene-tbc1d30/gene-tsnare1	1
BP	GO:0001934	positive regulation of protein phosphorylation	1/178	69/11595	0.657207990281561	0.785450618603026	gene-dok7b	1	dok7b	0	-	1
BP	GO:0032496	response to lipopolysaccharide	1/178	69/11595	0.657207990281561	0.785450618603026	gene-LOC122868820	1	LOC122868820	0	-	1
BP	GO:0007423	sensory organ development	3/178	219/11595	0.657462544960632	0.785450618603026	gene-LOC122877917/gene-id2a/gene-rpgrb	3	id2a/LOC122877917/rpgrb	1	gene-LOC122877917	2
BP	GO:0098542	defense response to other organism	3/178	219/11595	0.657462544960632	0.785450618603026	gene-ptx3a/gene-LOC122881038/gene-LOC122881039	3	LOC122881038/LOC122881039/ptx3a	1	gene-ptx3a	2
BP	GO:0048511	rhythmic process	1/178	70/11595	0.662501845715352	0.790554864505241	gene-camk1gb	1	camk1gb	1	gene-camk1gb	0
BP	GO:0019752	carboxylic acid metabolic process	5/178	366/11595	0.666457996148481	0.792190500470573	gene-LOC122876938/gene-psat1/gene-ddah1/gene-enosf1/gene-LOC122871599	5	ddah1/enosf1/LOC122871599/LOC122876938/psat1	4	gene-enosf1/gene-LOC122871599/gene-LOC122876938/gene-psat1	1
BP	GO:0001818	negative regulation of cytokine production	1/178	71/11595	0.667714398553762	0.792190500470573	gene-LOC122877917	1	LOC122877917	1	gene-LOC122877917	0
BP	GO:0003012	muscle system process	1/178	71/11595	0.667714398553762	0.792190500470573	gene-LOC122877917	1	LOC122877917	1	gene-LOC122877917	0
BP	GO:0038061	NIK/NF-kappaB signaling	1/178	71/11595	0.667714398553762	0.792190500470573	gene-uacab	1	uacab	0	-	1
BP	GO:0051656	establishment of organelle localization	1/178	71/11595	0.667714398553762	0.792190500470573	gene-LOC122886528	1	LOC122886528	1	gene-LOC122886528	0
BP	GO:0007417	central nervous system development	3/178	224/11595	0.672434580236532	0.795533422125892	gene-reln/gene-ndnf/gene-trim69	3	ndnf/reln/trim69	1	gene-trim69	2
BP	GO:0006605	protein targeting	1/178	72/11595	0.672846890488631	0.795533422125892	gene-LOC122863926	1	LOC122863926	1	gene-LOC122863926	0
BP	GO:0050678	regulation of epithelial cell proliferation	1/178	72/11595	0.672846890488631	0.795533422125892	gene-snai2	1	snai2	0	-	1
BP	GO:0043436	oxoacid metabolic process	5/178	370/11595	0.675788057092791	0.798095632145095	gene-LOC122876938/gene-psat1/gene-ddah1/gene-enosf1/gene-LOC122871599	5	ddah1/enosf1/LOC122871599/LOC122876938/psat1	4	gene-enosf1/gene-LOC122871599/gene-LOC122876938/gene-psat1	1
BP	GO:0098742	cell-cell adhesion via plasma-membrane adhesion molecules	2/178	151/11595	0.677576849332486	0.79876052711907	gene-LOC122877917/gene-pcdh15a	2	LOC122877917/pcdh15a	1	gene-LOC122877917	1
BP	GO:0045859	regulation of protein kinase activity	1/178	73/11595	0.677900544354206	0.79876052711907	gene-dok7b	1	dok7b	0	-	1
BP	GO:0002237	response to molecule of bacterial origin	1/178	74/11595	0.682876564411917	0.802184479111634	gene-LOC122868820	1	LOC122868820	0	-	1
BP	GO:0043408	regulation of MAPK cascade	1/178	74/11595	0.682876564411917	0.802184479111634	gene-LOC122877917	1	LOC122877917	1	gene-LOC122877917	0
BP	GO:0022402	cell cycle process	4/178	301/11595	0.683140613637259	0.802184479111634	gene-LOC122877917/gene-id2a/gene-LOC122865952/gene-LOC122868820	4	id2a/LOC122865952/LOC122868820/LOC122877917	1	gene-LOC122877917	3
BP	GO:0007411	axon guidance	1/178	75/11595	0.687776136630881	0.804877635489714	gene-LOC122888546	1	LOC122888546	0	-	1
BP	GO:0060562	epithelial tube morphogenesis	1/178	75/11595	0.687776136630881	0.804877635489714	gene-skib	1	skib	0	-	1
BP	GO:0071345	cellular response to cytokine stimulus	1/178	75/11595	0.687776136630881	0.804877635489714	gene-LOC122877917	1	LOC122877917	1	gene-LOC122877917	0
BP	GO:0007283	spermatogenesis	1/178	76/11595	0.692600428964188	0.808687477080496	gene-LOC122865494	1	LOC122865494	1	gene-LOC122865494	0
BP	GO:0097485	neuron projection guidance	1/178	76/11595	0.692600428964188	0.808687477080496	gene-LOC122888546	1	LOC122888546	0	-	1
BP	GO:0046903	secretion	2/178	156/11595	0.694835920366843	0.810379902599791	gene-si:dkey-196h17.9/gene-LOC122871213	2	LOC122871213/si:dkey-196h17.9	1	gene-si:dkey-196h17.9	1
BP	GO:0042060	wound healing	1/178	77/11595	0.697350591621049	0.812393740069267	gene-snai2	1	snai2	0	-	1
BP	GO:0006974	cellular response to DNA damage stimulus	4/178	308/11595	0.700433726773797	0.815064528559576	gene-snai2/gene-id2a/gene-LOC122868820/gene-LOC122871826	4	id2a/LOC122868820/LOC122871826/snai2	0	-	4
BP	GO:0034097	response to cytokine	1/178	78/11595	0.702027757334841	0.815998441727419	gene-LOC122877917	1	LOC122877917	1	gene-LOC122877917	0
BP	GO:0009150	purine ribonucleotide metabolic process	2/178	159/11595	0.70482286000389	0.816733138708685	gene-ampd3a/gene-pde4ba	2	ampd3a/pde4ba	0	-	2
BP	GO:0000165	MAPK cascade	1/178	79/11595	0.706633041627139	0.816733138708685	gene-LOC122877917	1	LOC122877917	1	gene-LOC122877917	0
BP	GO:0042327	positive regulation of phosphorylation	1/178	79/11595	0.706633041627139	0.816733138708685	gene-dok7b	1	dok7b	0	-	1
BP	GO:0048232	male gamete generation	1/178	79/11595	0.706633041627139	0.816733138708685	gene-LOC122865494	1	LOC122865494	1	gene-LOC122865494	0
BP	GO:0006575	cellular modified amino acid metabolic process	1/178	80/11595	0.711167543067775	0.816733138708685	gene-LOC122874604	1	LOC122874604	0	-	1
BP	GO:0014706	striated muscle tissue development	1/178	80/11595	0.711167543067775	0.816733138708685	gene-pdzph1	1	pdzph1	1	gene-pdzph1	0
BP	GO:0018205	peptidyl-lysine modification	1/178	80/11595	0.711167543067775	0.816733138708685	gene-snai2	1	snai2	0	-	1
BP	GO:0043549	regulation of kinase activity	1/178	80/11595	0.711167543067775	0.816733138708685	gene-dok7b	1	dok7b	0	-	1
BP	GO:0019220	regulation of phosphate metabolic process	2/178	161/11595	0.711329542154429	0.816733138708685	gene-swap70a/gene-dok7b	2	dok7b/swap70a	0	-	2
BP	GO:0051174	regulation of phosphorus metabolic process	2/178	161/11595	0.711329542154429	0.816733138708685	gene-swap70a/gene-dok7b	2	dok7b/swap70a	0	-	2
BP	GO:0006082	organic acid metabolic process	5/178	386/11595	0.711373771639572	0.816733138708685	gene-LOC122876938/gene-psat1/gene-ddah1/gene-enosf1/gene-LOC122871599	5	ddah1/enosf1/LOC122871599/LOC122876938/psat1	4	gene-enosf1/gene-LOC122871599/gene-LOC122876938/gene-psat1	1
BP	GO:0019637	organophosphate metabolic process	6/178	460/11595	0.714327068879613	0.818542897920988	gene-ampd3a/gene-zgc:77375/gene-LOC122874604/gene-pde4ba/gene-plpp3/gene-smpdl3b	6	ampd3a/LOC122874604/pde4ba/plpp3/smpdl3b/zgc:77375	0	-	6
BP	GO:0048667	cell morphogenesis involved in neuron differentiation	2/178	162/11595	0.714537932229767	0.818542897920988	gene-nptx1l/gene-LOC122888546	2	LOC122888546/nptx1l	1	gene-nptx1l	1
BP	GO:0016570	histone modification	1/178	81/11595	0.715632343530991	0.818886732719703	gene-snai2	1	snai2	0	-	1
BP	GO:0045893	positive regulation of transcription, DNA-templated	3/178	241/11595	0.719747190018485	0.820322725959259	gene-LOC122877917/gene-rel/gene-mef2ca	3	LOC122877917/mef2ca/rel	3	gene-LOC122877917/gene-mef2ca/gene-rel	0
BP	GO:1902680	positive regulation of RNA biosynthetic process	3/178	241/11595	0.719747190018485	0.820322725959259	gene-LOC122877917/gene-rel/gene-mef2ca	3	LOC122877917/mef2ca/rel	3	gene-LOC122877917/gene-mef2ca/gene-rel	0
BP	GO:1903508	positive regulation of nucleic acid-templated transcription	3/178	241/11595	0.719747190018485	0.820322725959259	gene-LOC122877917/gene-rel/gene-mef2ca	3	LOC122877917/mef2ca/rel	3	gene-LOC122877917/gene-mef2ca/gene-rel	0
BP	GO:0032879	regulation of localization	6/178	463/11595	0.720162340430611	0.820322725959259	gene-swap70a/gene-LOC122877917/gene-LOC122881975/gene-LOC122881976/gene-snai2/gene-LOC122888653	6	LOC122877917/LOC122881975/LOC122881976/LOC122888653/snai2/swap70a	4	gene-LOC122877917/gene-LOC122881975/gene-LOC122881976/gene-LOC122888653	2
BP	GO:0006163	purine nucleotide metabolic process	2/178	164/11595	0.720865557438495	0.820322725959259	gene-ampd3a/gene-pde4ba	2	ampd3a/pde4ba	0	-	2
BP	GO:0007420	brain development	2/178	165/11595	0.723985098755774	0.820734795088941	gene-ndnf/gene-trim69	2	ndnf/trim69	1	gene-trim69	1
BP	GO:0043254	regulation of protein-containing complex assembly	2/178	165/11595	0.723985098755774	0.820734795088941	gene-fmn2a/gene-LOC122861414	2	fmn2a/LOC122861414	1	gene-LOC122861414	1
BP	GO:0009416	response to light stimulus	1/178	83/11595	0.724357087054215	0.820734795088941	gene-tafa3a	1	tafa3a	1	gene-tafa3a	0
BP	GO:0016569	covalent chromatin modification	1/178	84/11595	0.728619112636594	0.820734795088941	gene-snai2	1	snai2	0	-	1
BP	GO:0048015	phosphatidylinositol-mediated signaling	1/178	84/11595	0.728619112636594	0.820734795088941	gene-LOC122877917	1	LOC122877917	1	gene-LOC122877917	0
BP	GO:0051090	regulation of DNA-binding transcription factor activity	1/178	84/11595	0.728619112636594	0.820734795088941	gene-LOC122877917	1	LOC122877917	1	gene-LOC122877917	0
BP	GO:0010604	positive regulation of macromolecule metabolic process	6/178	468/11595	0.729705657736893	0.820734795088941	gene-dok7b/gene-LOC122877917/gene-rel/gene-snai2/gene-mef2ca/gene-wbp2	6	dok7b/LOC122877917/mef2ca/rel/snai2/wbp2	4	gene-LOC122877917/gene-mef2ca/gene-rel/gene-wbp2	2
BP	GO:0090407	organophosphate biosynthetic process	3/178	245/11595	0.730081104745251	0.820734795088941	gene-ampd3a/gene-zgc:77375/gene-LOC122874604	3	ampd3a/LOC122874604/zgc:77375	0	-	3
BP	GO:0001822	kidney development	1/178	85/11595	0.732815602772176	0.820734795088941	gene-LOC122865952	1	LOC122865952	0	-	1
BP	GO:0006887	exocytosis	1/178	85/11595	0.732815602772176	0.820734795088941	gene-si:dkey-196h17.9	1	si:dkey-196h17.9	1	gene-si:dkey-196h17.9	0
BP	GO:0010562	positive regulation of phosphorus metabolic process	1/178	85/11595	0.732815602772176	0.820734795088941	gene-dok7b	1	dok7b	0	-	1
BP	GO:0016311	dephosphorylation	1/178	85/11595	0.732815602772176	0.820734795088941	gene-swap70a	1	swap70a	0	-	1
BP	GO:0045937	positive regulation of phosphate metabolic process	1/178	85/11595	0.732815602772176	0.820734795088941	gene-dok7b	1	dok7b	0	-	1
BP	GO:0072001	renal system development	1/178	85/11595	0.732815602772176	0.820734795088941	gene-LOC122865952	1	LOC122865952	0	-	1
BP	GO:0045944	positive regulation of transcription by RNA polymerase II	2/178	168/11595	0.733168522092061	0.820734795088941	gene-LOC122877917/gene-mef2ca	2	LOC122877917/mef2ca	2	gene-LOC122877917/gene-mef2ca	0
BP	GO:0051254	positive regulation of RNA metabolic process	3/178	247/11595	0.735135726160792	0.822044396607133	gene-LOC122877917/gene-rel/gene-mef2ca	3	LOC122877917/mef2ca/rel	3	gene-LOC122877917/gene-mef2ca/gene-rel	0
BP	GO:0009101	glycoprotein biosynthetic process	2/178	169/11595	0.73617179868602	0.822286725014512	gene-xylt1/gene-LOC122863823	2	LOC122863823/xylt1	0	-	2
BP	GO:0060537	muscle tissue development	1/178	86/11595	0.736947559566838	0.822286725014512	gene-pdzph1	1	pdzph1	1	gene-pdzph1	0
BP	GO:0010605	negative regulation of macromolecule metabolic process	6/178	473/11595	0.739020941465339	0.822455808353201	gene-swap70a/gene-LOC122877917/gene-snai2/gene-id2a/gene-jazf1a/gene-LOC122865952	6	id2a/jazf1a/LOC122865952/LOC122877917/snai2/swap70a	1	gene-LOC122877917	5
BP	GO:0001655	urogenital system development	1/178	87/11595	0.741015969888942	0.822455808353201	gene-LOC122865952	1	LOC122865952	0	-	1
BP	GO:0007249	I-kappaB kinase/NF-kappaB signaling	1/178	87/11595	0.741015969888942	0.822455808353201	gene-rel	1	rel	1	gene-rel	0
BP	GO:0048017	inositol lipid-mediated signaling	1/178	87/11595	0.741015969888942	0.822455808353201	gene-LOC122877917	1	LOC122877917	1	gene-LOC122877917	0
BP	GO:0009259	ribonucleotide metabolic process	2/178	171/11595	0.742092539423421	0.822455808353201	gene-ampd3a/gene-pde4ba	2	ampd3a/pde4ba	0	-	2
BP	GO:0034613	cellular protein localization	6/178	475/11595	0.742683179026993	0.822455808353201	gene-nptx1l/gene-rab3ab/gene-tsnare1/gene-LOC122863926/gene-rundc1/gene-tbc1d30	6	LOC122863926/nptx1l/rab3ab/rundc1/tbc1d30/tsnare1	5	gene-LOC122863926/gene-nptx1l/gene-rundc1/gene-tbc1d30/gene-tsnare1	1
BP	GO:0070727	cellular macromolecule localization	6/178	475/11595	0.742683179026993	0.822455808353201	gene-nptx1l/gene-rab3ab/gene-tsnare1/gene-LOC122863926/gene-rundc1/gene-tbc1d30	6	LOC122863926/nptx1l/rab3ab/rundc1/tbc1d30/tsnare1	5	gene-LOC122863926/gene-nptx1l/gene-rundc1/gene-tbc1d30/gene-tsnare1	1
BP	GO:0019693	ribose phosphate metabolic process	2/178	172/11595	0.745010337838863	0.82414770205136	gene-ampd3a/gene-pde4ba	2	ampd3a/pde4ba	0	-	2
BP	GO:0031399	regulation of protein modification process	3/178	253/11595	0.749855099884064	0.828618014984426	gene-swap70a/gene-dok7b/gene-snai2	3	dok7b/snai2/swap70a	0	-	3
BP	GO:0009152	purine ribonucleotide biosynthetic process	1/178	90/11595	0.752849566954867	0.831036299283156	gene-ampd3a	1	ampd3a	0	-	1
BP	GO:0040007	growth	2/178	176/11595	0.756401691208171	0.832582964326643	gene-ccn1/gene-dcn	2	ccn1/dcn	1	gene-dcn	1
BP	GO:0010256	endomembrane system organization	1/178	91/11595	0.75667336331141	0.832582964326643	gene-ndrg1a	1	ndrg1a	1	gene-ndrg1a	0
BP	GO:0032880	regulation of protein localization	1/178	91/11595	0.75667336331141	0.832582964326643	gene-swap70a	1	swap70a	0	-	1
BP	GO:0060322	head development	2/178	178/11595	0.761931891173494	0.836583365069087	gene-ndnf/gene-trim69	2	ndnf/trim69	1	gene-trim69	1
BP	GO:0072521	purine-containing compound metabolic process	2/178	178/11595	0.761931891173494	0.836583365069087	gene-ampd3a/gene-pde4ba	2	ampd3a/pde4ba	0	-	2
BP	GO:0006357	regulation of transcription by RNA polymerase II	6/178	488/11595	0.765599869434745	0.839716452539598	gene-LOC122877917/gene-zbtb46/gene-snai2/gene-jazf1a/gene-mef2ca/gene-LOC122865952	6	jazf1a/LOC122865952/LOC122877917/mef2ca/snai2/zbtb46	2	gene-LOC122877917/gene-mef2ca	4
BP	GO:0006164	purine nucleotide biosynthetic process	1/178	94/11595	0.767795342833944	0.841229541404672	gene-ampd3a	1	ampd3a	0	-	1
BP	GO:0010557	positive regulation of macromolecule biosynthetic process	3/178	265/11595	0.777336303307666	0.850729964635428	gene-LOC122877917/gene-rel/gene-mef2ca	3	LOC122877917/mef2ca/rel	3	gene-LOC122877917/gene-mef2ca/gene-rel	0
BP	GO:0051640	organelle localization	1/178	97/11595	0.778411684352575	0.850729964635428	gene-LOC122886528	1	LOC122886528	1	gene-LOC122886528	0
BP	GO:1901135	carbohydrate derivative metabolic process	6/178	496/11595	0.778941888085202	0.850729964635428	gene-ampd3a/gene-xylt1/gene-pde4ba/gene-ndnf/gene-LOC122863823/gene-dcn	6	ampd3a/dcn/LOC122863823/ndnf/pde4ba/xylt1	1	gene-dcn	5
BP	GO:0048568	embryonic organ development	2/178	185/11595	0.780443049395785	0.851467496219105	gene-skib/gene-pthlha	2	pthlha/skib	0	-	2
BP	GO:0072522	purine-containing compound biosynthetic process	1/178	98/11595	0.781842082698831	0.852092164125259	gene-ampd3a	1	ampd3a	0	-	1
BP	GO:0010639	negative regulation of organelle organization	1/178	99/11595	0.78521966896304	0.852943421695834	gene-swap70a	1	swap70a	0	-	1
BP	GO:0042110	T cell activation	1/178	99/11595	0.78521966896304	0.852943421695834	gene-wdfy4	1	wdfy4	1	gene-wdfy4	0
BP	GO:0120031	plasma membrane bounded cell projection assembly	2/178	187/11595	0.785496619184656	0.852943421695834	gene-amotl2a/gene-rpgrb	2	amotl2a/rpgrb	0	-	2
BP	GO:0045935	positive regulation of nucleobase-containing compound metabolic process	3/178	269/11595	0.785932347828363	0.852943421695834	gene-LOC122877917/gene-rel/gene-mef2ca	3	LOC122877917/mef2ca/rel	3	gene-LOC122877917/gene-mef2ca/gene-rel	0
BP	GO:0007600	sensory perception	2/178	188/11595	0.787985096090728	0.853432235764681	gene-snai2/gene-LOC122863926	2	LOC122863926/snai2	1	gene-LOC122863926	1
BP	GO:0016071	mRNA metabolic process	3/178	270/11595	0.788038301113459	0.853432235764681	gene-cpeb1b/gene-celf5a/gene-rbfox1	3	celf5a/cpeb1b/rbfox1	2	gene-cpeb1b/gene-rbfox1	1
BP	GO:0009260	ribonucleotide biosynthetic process	1/178	102/11595	0.795043579260976	0.860115351750332	gene-ampd3a	1	ampd3a	0	-	1
BP	GO:0046390	ribose phosphate biosynthetic process	1/178	103/11595	0.798217880391364	0.862644271156705	gene-ampd3a	1	ampd3a	0	-	1
BP	GO:0030031	cell projection assembly	2/178	193/11595	0.80005178541167	0.863720828020347	gene-amotl2a/gene-rpgrb	2	amotl2a/rpgrb	0	-	2
BP	GO:0006310	DNA recombination	1/178	105/11595	0.804420559540604	0.86571774205257	gene-swap70a	1	swap70a	0	-	1
BP	GO:0006650	glycerophospholipid metabolic process	1/178	105/11595	0.804420559540604	0.86571774205257	gene-zgc:77375	1	zgc:77375	0	-	1
BP	GO:0051259	protein complex oligomerization	1/178	105/11595	0.804420559540604	0.86571774205257	gene-trpm6	1	trpm6	0	-	1
BP	GO:0001932	regulation of protein phosphorylation	1/178	106/11595	0.807450423805336	0.867168111399272	gene-dok7b	1	dok7b	0	-	1
BP	GO:0034655	nucleobase-containing compound catabolic process	1/178	106/11595	0.807450423805336	0.867168111399272	gene-pde4ba	1	pde4ba	0	-	1
BP	GO:0016042	lipid catabolic process	1/178	108/11595	0.813370832825341	0.872617407536864	gene-smpdl3b	1	smpdl3b	0	-	1
BP	GO:0006260	DNA replication	1/178	110/11595	0.819110195696496	0.877331879367774	gene-LOC122868820	1	LOC122868820	0	-	1
BP	GO:0048584	positive regulation of response to stimulus	3/178	286/11595	0.819467119137891	0.877331879367774	gene-swap70a/gene-tmem198a/gene-snai2	3	snai2/swap70a/tmem198a	1	gene-tmem198a	2
BP	GO:0002252	immune effector process	1/178	112/11595	0.824674018485347	0.881076593842895	gene-swap70a	1	swap70a	0	-	1
BP	GO:0007276	gamete generation	1/178	112/11595	0.824674018485347	0.881076593842895	gene-LOC122865494	1	LOC122865494	1	gene-LOC122865494	0
BP	GO:1901565	organonitrogen compound catabolic process	4/178	371/11595	0.826123982712243	0.881712035379216	gene-ddah1/gene-pde4ba/gene-smpdl3b/gene-enosf1	4	ddah1/enosf1/pde4ba/smpdl3b	1	gene-enosf1	3
BP	GO:0048609	multicellular organismal reproductive process	1/178	116/11595	0.835296240437826	0.890579549008685	gene-LOC122865494	1	LOC122865494	1	gene-LOC122865494	0
BP	GO:0044255	cellular lipid metabolic process	4/178	378/11595	0.836964925043381	0.890940114401322	gene-zgc:77375/gene-plpp3/gene-smpdl3b/gene-LOC122883333	4	LOC122883333/plpp3/smpdl3b/zgc:77375	1	gene-LOC122883333	3
BP	GO:0033554	cellular response to stress	5/178	458/11595	0.837362726338391	0.890940114401322	gene-LOC122877917/gene-snai2/gene-id2a/gene-LOC122868820/gene-LOC122871826	5	id2a/LOC122868820/LOC122871826/LOC122877917/snai2	1	gene-LOC122877917	4
BP	GO:0007005	mitochondrion organization	1/178	118/11595	0.840364838966627	0.893212524716074	gene-nptx1l	1	nptx1l	1	gene-nptx1l	0
BP	GO:0034622	cellular protein-containing complex assembly	4/178	381/11595	0.841436591010839	0.893430613112435	gene-fmn2a/gene-LOC122888042/gene-LOC122861414/gene-LOC122867164	4	fmn2a/LOC122861414/LOC122867164/LOC122888042	2	gene-LOC122861414/gene-LOC122888042	2
BP	GO:0032504	multicellular organism reproduction	1/178	119/11595	0.842840665285694	0.894000746820526	gene-LOC122865494	1	LOC122865494	1	gene-LOC122865494	0
BP	GO:0022414	reproductive process	2/178	214/11595	0.844349789596372	0.894681020630893	gene-tex11/gene-LOC122865494	2	LOC122865494/tex11	1	gene-LOC122865494	1
BP	GO:0000003	reproduction	2/178	215/11595	0.846220319475274	0.895742453161199	gene-tex11/gene-LOC122865494	2	LOC122865494/tex11	1	gene-LOC122865494	1
BP	GO:0032268	regulation of cellular protein metabolic process	4/178	387/11595	0.850073810005487	0.898898562169904	gene-swap70a/gene-dok7b/gene-LOC122877917/gene-snai2	4	dok7b/LOC122877917/snai2/swap70a	1	gene-LOC122877917	3
BP	GO:0003006	developmental process involved in reproduction	1/178	125/11595	0.8569139086388	0.903351983442334	gene-LOC122865494	1	LOC122865494	1	gene-LOC122865494	0
BP	GO:0006468	protein phosphorylation	1/178	125/11595	0.8569139086388	0.903351983442334	gene-dok7b	1	dok7b	0	-	1
BP	GO:0006897	endocytosis	1/178	125/11595	0.8569139086388	0.903351983442334	gene-lrp1bb	1	lrp1bb	0	-	1
BP	GO:0042325	regulation of phosphorylation	1/178	131/11595	0.869733371207576	0.915255030455706	gene-dok7b	1	dok7b	0	-	1
BP	GO:0051246	regulation of protein metabolic process	4/178	403/11595	0.871193933978613	0.915255030455706	gene-swap70a/gene-dok7b/gene-LOC122877917/gene-snai2	4	dok7b/LOC122877917/snai2/swap70a	1	gene-LOC122877917	3
BP	GO:0044270	cellular nitrogen compound catabolic process	1/178	132/11595	0.871756003790013	0.915255030455706	gene-pde4ba	1	pde4ba	0	-	1
BP	GO:0046700	heterocycle catabolic process	1/178	132/11595	0.871756003790013	0.915255030455706	gene-pde4ba	1	pde4ba	0	-	1
BP	GO:0009117	nucleotide metabolic process	2/178	231/11595	0.873504616300782	0.916157944461959	gene-ampd3a/gene-pde4ba	2	ampd3a/pde4ba	0	-	2
BP	GO:0007017	microtubule-based process	4/178	408/11595	0.877250710733119	0.918174641799633	gene-map1aa/gene-LOC122886528/gene-kif26bb/gene-rpgrb	4	kif26bb/LOC122886528/map1aa/rpgrb	3	gene-kif26bb/gene-LOC122886528/gene-map1aa	1
BP	GO:0007156	homophilic cell adhesion via plasma membrane adhesion molecules	1/178	135/11595	0.877638423836	0.918174641799633	gene-pcdh15a	1	pcdh15a	0	-	1
BP	GO:0006753	nucleoside phosphate metabolic process	2/178	234/11595	0.878099123971327	0.918174641799633	gene-ampd3a/gene-pde4ba	2	ampd3a/pde4ba	0	-	2
BP	GO:0019439	aromatic compound catabolic process	1/178	136/11595	0.879538978858442	0.918748416619102	gene-pde4ba	1	pde4ba	0	-	1
BP	GO:0046486	glycerolipid metabolic process	1/178	137/11595	0.881410177197145	0.919771146447628	gene-zgc:77375	1	zgc:77375	0	-	1
BP	GO:0019953	sexual reproduction	1/178	141/11595	0.888610319659883	0.925411353100342	gene-LOC122865494	1	LOC122865494	1	gene-LOC122865494	0
BP	GO:1901361	organic cyclic compound catabolic process	1/178	141/11595	0.888610319659883	0.925411353100342	gene-pde4ba	1	pde4ba	0	-	1
BP	GO:0009165	nucleotide biosynthetic process	1/178	142/11595	0.89034136236117	0.926278450650218	gene-ampd3a	1	ampd3a	0	-	1
BP	GO:1901137	carbohydrate derivative biosynthetic process	3/178	335/11595	0.89223651448444	0.92731436132405	gene-ampd3a/gene-xylt1/gene-LOC122863823	3	ampd3a/LOC122863823/xylt1	0	-	3
BP	GO:1901293	nucleoside phosphate biosynthetic process	1/178	144/11595	0.893723601884823	0.927771114338006	gene-ampd3a	1	ampd3a	0	-	1
BP	GO:0044092	negative regulation of molecular function	1/178	145/11595	0.895375614710297	0.927771114338006	gene-LOC122877917	1	LOC122877917	1	gene-LOC122877917	0
BP	GO:0044703	multi-organism reproductive process	1/178	145/11595	0.895375614710297	0.927771114338006	gene-LOC122865494	1	LOC122865494	1	gene-LOC122865494	0
BP	GO:0051704	multi-organism process	1/178	147/11595	0.898603419943025	0.930180849358693	gene-LOC122865494	1	LOC122865494	1	gene-LOC122865494	0
BP	GO:0032259	methylation	1/178	157/11595	0.913315932349431	0.944462112590034	gene-LOC122876938	1	LOC122876938	1	gene-LOC122876938	0
BP	GO:0050776	regulation of immune response	1/178	159/11595	0.915993038112884	0.946281385064512	gene-irf1b	1	irf1b	1	gene-irf1b	0
BP	GO:0006486	protein glycosylation	1/178	162/11595	0.919855306923532	0.947135264359627	gene-LOC122863823	1	LOC122863823	0	-	1
BP	GO:0043413	macromolecule glycosylation	1/178	162/11595	0.919855306923532	0.947135264359627	gene-LOC122863823	1	LOC122863823	0	-	1
BP	GO:0007186	G protein-coupled receptor signaling pathway	1/178	164/11595	0.92233152804759	0.947135264359627	gene-LOC122864683	1	LOC122864683	1	gene-LOC122864683	0
BP	GO:0033365	protein localization to organelle	1/178	164/11595	0.92233152804759	0.947135264359627	gene-nptx1l	1	nptx1l	1	gene-nptx1l	0
BP	GO:0060271	cilium assembly	1/178	164/11595	0.92233152804759	0.947135264359627	gene-rpgrb	1	rpgrb	0	-	1
BP	GO:0070085	glycosylation	1/178	164/11595	0.92233152804759	0.947135264359627	gene-LOC122863823	1	LOC122863823	0	-	1
BP	GO:0045087	innate immune response	1/178	165/11595	0.923540957494491	0.947421783864173	gene-ptx3a	1	ptx3a	1	gene-ptx3a	0
BP	GO:0008380	RNA splicing	1/178	166/11595	0.924731658243921	0.947421783864173	gene-rbfox1	1	rbfox1	1	gene-rbfox1	0
BP	GO:0055086	nucleobase-containing small molecule metabolic process	2/178	273/11595	0.925367348546287	0.947421783864173	gene-ampd3a/gene-pde4ba	2	ampd3a/pde4ba	0	-	2
BP	GO:0070925	organelle assembly	2/178	286/11595	0.936855555230926	0.957200236795837	gene-nptx1l/gene-rpgrb	2	nptx1l/rpgrb	1	gene-nptx1l	1
BP	GO:0007169	transmembrane receptor protein tyrosine kinase signaling pathway	1/178	178/11595	0.937659921181392	0.957200236795837	gene-kdrl	1	kdrl	0	-	1
BP	GO:0009967	positive regulation of signal transduction	1/178	179/11595	0.938631851988935	0.957200236795837	gene-tmem198a	1	tmem198a	1	gene-tmem198a	0
BP	GO:0044782	cilium organization	1/178	179/11595	0.938631851988935	0.957200236795837	gene-rpgrb	1	rpgrb	0	-	1
BP	GO:0032787	monocarboxylic acid metabolic process	1/178	182/11595	0.941458154097103	0.95913375185189	gene-LOC122871599	1	LOC122871599	1	gene-LOC122871599	0
BP	GO:0051129	negative regulation of cellular component organization	1/178	185/11595	0.94415498887899	0.960931681672497	gene-swap70a	1	swap70a	0	-	1
BP	GO:0010647	positive regulation of cell communication	1/178	189/11595	0.947559531465537	0.962496430483713	gene-tmem198a	1	tmem198a	1	gene-tmem198a	0
BP	GO:0023056	positive regulation of signaling	1/178	189/11595	0.947559531465537	0.962496430483713	gene-tmem198a	1	tmem198a	1	gene-tmem198a	0
BP	GO:0006259	DNA metabolic process	3/178	423/11595	0.960427770321692	0.974607314174866	gene-swap70a/gene-LOC122877917/gene-LOC122871826	3	LOC122871826/LOC122877917/swap70a	1	gene-LOC122877917	2
BP	GO:0006325	chromatin organization	1/178	214/11595	0.964623804013262	0.977185736296979	gene-snai2	1	snai2	0	-	1
BP	GO:0006396	RNA processing	3/178	433/11595	0.964864286663749	0.977185736296979	gene-cpeb1b/gene-celf5a/gene-rbfox1	3	celf5a/cpeb1b/rbfox1	2	gene-cpeb1b/gene-rbfox1	1
BP	GO:0006508	proteolysis	2/178	339/11595	0.968555702293435	0.979757798464324	gene-LOC122877917/gene-LOC122871823	2	LOC122871823/LOC122877917	1	gene-LOC122877917	1
BP	GO:0010629	negative regulation of gene expression	1/178	223/11595	0.969304514484588	0.979757798464324	gene-LOC122877917	1	LOC122877917	1	gene-LOC122877917	0
BP	GO:0000226	microtubule cytoskeleton organization	1/178	231/11595	0.972945151372849	0.982474486841731	gene-map1aa	1	map1aa	1	gene-map1aa	0
BP	GO:0016310	phosphorylation	1/178	234/11595	0.974196771188116	0.982775803419714	gene-dok7b	1	dok7b	0	-	1
BP	GO:0006281	DNA repair	1/178	245/11595	0.978312974841509	0.985963516189243	gene-LOC122871826	1	LOC122871826	0	-	1
BP	GO:0051301	cell division	1/178	271/11595	0.985628130939274	0.992365823240617	gene-tgfb3	1	tgfb3	0	-	1
BP	GO:0005975	carbohydrate metabolic process	1/178	287/11595	0.988848159839724	0.994636539311956	gene-enosf1	1	enosf1	1	gene-enosf1	0
BP	GO:0016567	protein ubiquitination	1/178	337/11595	0.994964296828778	0.998103697353937	gene-sh3rf1	1	sh3rf1	0	-	1
BP	GO:0055085	transmembrane transport	1/178	339/11595	0.995122283722	0.998103697353937	gene-LOC122882425	1	LOC122882425	1	gene-LOC122882425	0
BP	GO:0051276	chromosome organization	1/178	340/11595	0.995199418894129	0.998103697353937	gene-snai2	1	snai2	0	-	1
BP	GO:0032446	protein modification by small protein conjugation	1/178	356/11595	0.996280831654224	0.998217237546652	gene-sh3rf1	1	sh3rf1	0	-	1
BP	GO:0043603	cellular amide metabolic process	1/178	435/11595	0.998950960457152	0.999135117444203	gene-smpdl3b	1	smpdl3b	0	-	1
BP	GO:0070647	protein modification by small protein conjugation or removal	1/178	447/11595	0.999135117444203	0.999135117444203	gene-sh3rf1	1	sh3rf1	0	-	1
CC	GO:0005884	actin filament	3/255	17/15597	0.00247855501895264	0.270155364989992	gene-fmn2a/gene-LOC122861414/gene-LOC122867164	3	fmn2a/LOC122861414/LOC122867164	1	gene-LOC122861414	2
CC	GO:0015629	actin cytoskeleton	9/255	198/15597	0.00535655223584911	0.270155364989992	gene-swap70a/gene-afap1l1a/gene-LOC122882192/gene-fmn2a/gene-LOC122861414/gene-myh6/gene-LOC122865508/gene-myo1d/gene-LOC122867164	9	afap1l1a/fmn2a/LOC122861414/LOC122865508/LOC122867164/LOC122882192/myh6/myo1d/swap70a	2	gene-LOC122861414/gene-LOC122882192	7
CC	GO:0030312	external encapsulating structure	8/255	184/15597	0.0108856915666548	0.270155364989992	gene-mfap2/gene-lamb3/gene-ndnf/gene-LOC122879137/gene-mmp9/gene-matn1/gene-lrrc17/gene-LOC122872158	8	lamb3/LOC122872158/LOC122879137/lrrc17/matn1/mfap2/mmp9/ndnf	5	gene-lamb3/gene-LOC122879137/gene-matn1/gene-mfap2/gene-mmp9	3
CC	GO:0031012	extracellular matrix	8/255	184/15597	0.0108856915666548	0.270155364989992	gene-mfap2/gene-lamb3/gene-ndnf/gene-LOC122879137/gene-mmp9/gene-matn1/gene-lrrc17/gene-LOC122872158	8	lamb3/LOC122872158/LOC122879137/lrrc17/matn1/mfap2/mmp9/ndnf	5	gene-lamb3/gene-LOC122879137/gene-matn1/gene-mfap2/gene-mmp9	3
CC	GO:0016010	dystrophin-associated glycoprotein complex	2/255	11/15597	0.0132863294257373	0.270155364989992	gene-sgcg/gene-sgca	2	sgca/sgcg	1	gene-sgca	1
CC	GO:0090665	glycoprotein complex	2/255	11/15597	0.0132863294257373	0.270155364989992	gene-sgcg/gene-sgca	2	sgca/sgcg	1	gene-sgca	1
CC	GO:0016459	myosin complex	4/255	72/15597	0.0302179514942474	0.430954585620074	gene-LOC122882192/gene-myh6/gene-LOC122865508/gene-myo1d	4	LOC122865508/LOC122882192/myh6/myo1d	1	gene-LOC122882192	3
CC	GO:0098802	plasma membrane signaling receptor complex	3/255	43/15597	0.0329827106306487	0.430954585620074	gene-LOC122883451/gene-itga1/gene-itga3b	3	itga1/itga3b/LOC122883451	1	gene-itga3b	2
CC	GO:0005667	transcription regulator complex	5/255	109/15597	0.0332961700744936	0.430954585620074	gene-LOC122863684/gene-smad6b/gene-LOC122877917/gene-smad9/gene-smad7	5	LOC122863684/LOC122877917/smad6b/smad7/smad9	1	gene-LOC122877917	4
CC	GO:0005615	extracellular space	12/255	406/15597	0.0353241463623011	0.430954585620074	gene-LOC122873767/gene-LOC122876711/gene-LOC122877908/gene-il15l/gene-smpdl3b/gene-LOC122884604/gene-angptl4/gene-LOC122888056/gene-tgfb3/gene-LOC122868714/gene-lrrc17/gene-LOC122871823	12	angptl4/il15l/LOC122868714/LOC122871823/LOC122873767/LOC122876711/LOC122877908/LOC122884604/LOC122888056/lrrc17/smpdl3b/tgfb3	5	gene-LOC122873767/gene-LOC122876711/gene-LOC122877908/gene-LOC122884604/gene-LOC122888056	7
CC	GO:0043235	receptor complex	3/255	53/15597	0.0556697736791777	0.617428398987244	gene-LOC122883451/gene-itga1/gene-itga3b	3	itga1/itga3b/LOC122883451	1	gene-itga3b	2
CC	GO:0008305	integrin complex	2/255	32/15597	0.0959193545474128	0.845331172318305	gene-itga1/gene-itga3b	2	itga1/itga3b	1	gene-itga3b	1
CC	GO:0098636	protein complex involved in cell adhesion	2/255	32/15597	0.0959193545474128	0.845331172318305	gene-itga1/gene-itga3b	2	itga1/itga3b	1	gene-itga3b	1
CC	GO:0098978	glutamatergic synapse	2/255	36/15597	0.116867010896979	0.845331172318305	gene-nptx1l/gene-cnksr1	2	cnksr1/nptx1l	1	gene-nptx1l	1
CC	GO:0062023	collagen-containing extracellular matrix	4/255	121/15597	0.136739719761079	0.845331172318305	gene-lamb3/gene-LOC122879137/gene-matn1/gene-LOC122872158	4	lamb3/LOC122872158/LOC122879137/matn1	3	gene-lamb3/gene-LOC122879137/gene-matn1	1
CC	GO:0005912	adherens junction	2/255	42/15597	0.150122944921964	0.845331172318305	gene-pdzph1/Novel.33	2	pdzph1/Novel.33	2	gene-pdzph1/Novel.33	0
CC	GO:0005902	microvillus	1/255	12/15597	0.179534517815041	0.845331172318305	gene-cd44b	1	cd44b	0	-	1
CC	GO:0033180	proton-transporting V-type ATPase, V1 domain	1/255	12/15597	0.179534517815041	0.845331172318305	gene-atp6v1c1b	1	atp6v1c1b	1	gene-atp6v1c1b	0
CC	GO:0098839	postsynaptic density membrane	1/255	13/15597	0.192958880853678	0.845331172318305	gene-cnksr1	1	cnksr1	0	-	1
CC	GO:0099634	postsynaptic specialization membrane	1/255	14/15597	0.206164443314042	0.845331172318305	gene-cnksr1	1	cnksr1	0	-	1
CC	GO:0099081	supramolecular polymer	9/255	400/15597	0.209389747109455	0.845331172318305	gene-map1aa/gene-mfap2/gene-parvb/gene-synm/gene-amotl2a/gene-fmn2a/gene-LOC122861414/gene-ngs/gene-LOC122867164	9	amotl2a/fmn2a/LOC122861414/LOC122867164/map1aa/mfap2/ngs/parvb/synm	4	gene-LOC122861414/gene-map1aa/gene-mfap2/gene-parvb	5
CC	GO:0099512	supramolecular fiber	9/255	400/15597	0.209389747109455	0.845331172318305	gene-map1aa/gene-mfap2/gene-parvb/gene-synm/gene-amotl2a/gene-fmn2a/gene-LOC122861414/gene-ngs/gene-LOC122867164	9	amotl2a/fmn2a/LOC122861414/LOC122867164/map1aa/mfap2/ngs/parvb/synm	4	gene-LOC122861414/gene-map1aa/gene-mfap2/gene-parvb	5
CC	GO:0030424	axon	3/255	98/15597	0.216018960798592	0.845331172318305	gene-adgrl3.1/gene-si:dkey-91m11.5/gene-LOC122870064	3	adgrl3.1/LOC122870064/si:dkey-91m11.5	1	gene-LOC122870064	2
CC	GO:0005887	integral component of plasma membrane	7/255	304/15597	0.230713074545075	0.845331172318305	gene-prf1.5/gene-htr4/gene-epha2b/gene-LOC122883451/gene-itga1/gene-itga3b/Novel.146	7	epha2b/htr4/itga1/itga3b/LOC122883451/prf1.5/Novel.146	2	gene-itga3b/gene-prf1.5	5
CC	GO:0016605	PML body	1/255	16/15597	0.23193331852017	0.845331172318305	gene-LOC122871826	1	LOC122871826	0	-	1
CC	GO:0099513	polymeric cytoskeletal fiber	7/255	307/15597	0.237965721425442	0.845331172318305	gene-map1aa/gene-synm/gene-amotl2a/gene-fmn2a/gene-LOC122861414/gene-ngs/gene-LOC122867164	7	amotl2a/fmn2a/LOC122861414/LOC122867164/map1aa/ngs/synm	2	gene-LOC122861414/gene-map1aa	5
CC	GO:0045202	synapse	9/255	421/15597	0.252589962350658	0.845331172318305	gene-chrna3/gene-nptx1l/gene-pclob/gene-LOC122874997/gene-si:dkey-91m11.5/gene-htr4/gene-LOC122883451/gene-cnksr1/gene-LOC122871213	9	chrna3/cnksr1/htr4/LOC122871213/LOC122874997/LOC122883451/nptx1l/pclob/si:dkey-91m11.5	2	gene-nptx1l/gene-pclob	7
CC	GO:0000145	exocyst	1/255	18/15597	0.256868878505069	0.845331172318305	gene-si:dkey-196h17.9	1	si:dkey-196h17.9	1	gene-si:dkey-196h17.9	0
CC	GO:0043005	neuron projection	5/255	212/15597	0.26660852730655	0.845331172318305	gene-adgrl3.1/gene-nptx1l/gene-si:dkey-91m11.5/gene-cnksr1/gene-LOC122870064	5	adgrl3.1/cnksr1/LOC122870064/nptx1l/si:dkey-91m11.5	2	gene-LOC122870064/gene-nptx1l	3
CC	GO:0098797	plasma membrane protein complex	6/255	267/15597	0.27239696491601	0.845331172318305	gene-prf1.5/gene-sgcg/gene-LOC122883451/gene-itga1/gene-sgca/gene-itga3b	6	itga1/itga3b/LOC122883451/prf1.5/sgca/sgcg	3	gene-itga3b/gene-prf1.5/gene-sgca	3
CC	GO:0031252	cell leading edge	3/255	111/15597	0.272723877802945	0.845331172318305	gene-swap70a/gene-sh3rf1/gene-LOC122867164	3	LOC122867164/sh3rf1/swap70a	0	-	3
CC	GO:0005911	cell-cell junction	5/255	214/15597	0.272846105011479	0.845331172318305	gene-amotl2a/gene-cldn11a/gene-pdzph1/gene-jcada/Novel.33	5	amotl2a/cldn11a/jcada/pdzph1/Novel.33	3	gene-cldn11a/gene-pdzph1/Novel.33	2
CC	GO:0005882	intermediate filament	2/255	64/15597	0.281443661168558	0.845331172318305	gene-synm/gene-ngs	2	ngs/synm	0	-	2
CC	GO:0030027	lamellipodium	2/255	64/15597	0.281443661168558	0.845331172318305	gene-swap70a/gene-sh3rf1	2	sh3rf1/swap70a	0	-	2
CC	GO:0031226	intrinsic component of plasma membrane	7/255	327/15597	0.288033043928537	0.845331172318305	gene-prf1.5/gene-htr4/gene-epha2b/gene-LOC122883451/gene-itga1/gene-itga3b/Novel.146	7	epha2b/htr4/itga1/itga3b/LOC122883451/prf1.5/Novel.146	2	gene-itga3b/gene-prf1.5	5
CC	GO:0033178	proton-transporting two-sector ATPase complex, catalytic domain	1/255	21/15597	0.292768239820314	0.845331172318305	gene-atp6v1c1b	1	atp6v1c1b	1	gene-atp6v1c1b	0
CC	GO:0019898	extrinsic component of membrane	2/255	67/15597	0.299631200081796	0.845331172318305	gene-LOC122873544/gene-cnksr1	2	cnksr1/LOC122873544	1	gene-LOC122873544	1
CC	GO:0045111	intermediate filament cytoskeleton	2/255	67/15597	0.299631200081796	0.845331172318305	gene-synm/gene-ngs	2	ngs/synm	0	-	2
CC	GO:0005938	cell cortex	2/255	68/15597	0.305678786756448	0.845331172318305	gene-amotl2a/gene-si:dkey-196h17.9	2	amotl2a/si:dkey-196h17.9	1	gene-si:dkey-196h17.9	1
CC	GO:0000785	chromatin	4/255	173/15597	0.313833229601996	0.845331172318305	gene-LOC122877917/gene-dpf1/gene-snai2/gene-wbp2	4	dpf1/LOC122877917/snai2/wbp2	3	gene-dpf1/gene-LOC122877917/gene-wbp2	1
CC	GO:0009897	external side of plasma membrane	1/255	23/15597	0.315736082177039	0.845331172318305	gene-LOC122883012	1	LOC122883012	1	gene-LOC122883012	0
CC	GO:0048786	presynaptic active zone	1/255	24/15597	0.326939838376143	0.845331172318305	gene-pclob	1	pclob	1	gene-pclob	0
CC	GO:0016607	nuclear speck	2/255	72/15597	0.329759051585415	0.845331172318305	gene-wt1b/gene-LOC122868820	2	LOC122868820/wt1b	1	gene-wt1b	1
CC	GO:0000118	histone deacetylase complex	1/255	25/15597	0.337960858167711	0.845331172318305	gene-hdac9b	1	hdac9b	1	gene-hdac9b	0
CC	GO:0033176	proton-transporting V-type ATPase complex	1/255	25/15597	0.337960858167711	0.845331172318305	gene-atp6v1c1b	1	atp6v1c1b	1	gene-atp6v1c1b	0
CC	GO:0046930	pore complex	1/255	25/15597	0.337960858167711	0.845331172318305	gene-prf1.5	1	prf1.5	1	gene-prf1.5	0
CC	GO:0005776	autophagosome	1/255	26/15597	0.348802110490292	0.845331172318305	gene-sqstm1	1	sqstm1	1	gene-sqstm1	0
CC	GO:0016604	nuclear body	3/255	131/15597	0.36208418393775	0.845331172318305	gene-wt1b/gene-LOC122868820/gene-LOC122871826	3	LOC122868820/LOC122871826/wt1b	1	gene-wt1b	2
CC	GO:0032580	Golgi cisterna membrane	1/255	28/15597	0.369956949011791	0.845331172318305	gene-LOC122876915	1	LOC122876915	1	gene-LOC122876915	0
CC	GO:0099080	supramolecular complex	9/255	481/15597	0.387968541704848	0.845331172318305	gene-map1aa/gene-mfap2/gene-parvb/gene-synm/gene-amotl2a/gene-fmn2a/gene-LOC122861414/gene-ngs/gene-LOC122867164	9	amotl2a/fmn2a/LOC122861414/LOC122867164/map1aa/mfap2/ngs/parvb/synm	4	gene-LOC122861414/gene-map1aa/gene-mfap2/gene-parvb	5
CC	GO:0030018	Z disc	1/255	30/15597	0.390427158322774	0.845331172318305	gene-parvb	1	parvb	1	gene-parvb	0
CC	GO:0031985	Golgi cisterna	1/255	30/15597	0.390427158322774	0.845331172318305	gene-LOC122876915	1	LOC122876915	1	gene-LOC122876915	0
CC	GO:0042383	sarcolemma	1/255	30/15597	0.390427158322774	0.845331172318305	gene-sgcg	1	sgcg	0	-	1
CC	GO:0043197	dendritic spine	1/255	30/15597	0.390427158322774	0.845331172318305	gene-si:dkey-91m11.5	1	si:dkey-91m11.5	0	-	1
CC	GO:0044309	neuron spine	1/255	30/15597	0.390427158322774	0.845331172318305	gene-si:dkey-91m11.5	1	si:dkey-91m11.5	0	-	1
CC	GO:0045211	postsynaptic membrane	3/255	138/15597	0.393160687013613	0.845331172318305	gene-chrna3/gene-LOC122883451/gene-cnksr1	3	chrna3/cnksr1/LOC122883451	0	-	3
CC	GO:0070161	anchoring junction	5/255	252/15597	0.394949810017569	0.845331172318305	gene-amotl2a/gene-cldn11a/gene-pdzph1/gene-jcada/Novel.33	5	amotl2a/cldn11a/jcada/pdzph1/Novel.33	3	gene-cldn11a/gene-pdzph1/Novel.33	2
CC	GO:0030133	transport vesicle	2/255	89/15597	0.428734561703942	0.865620588391111	gene-nptx1l/gene-LOC122871213	2	LOC122871213/nptx1l	1	gene-nptx1l	1
CC	GO:0097060	synaptic membrane	3/255	148/15597	0.436832489749187	0.865620588391111	gene-chrna3/gene-LOC122883451/gene-cnksr1	3	chrna3/cnksr1/LOC122883451	0	-	3
CC	GO:0043296	apical junction complex	2/255	91/15597	0.43989629037544	0.865620588391111	gene-cldn11a/gene-pdzph1	2	cldn11a/pdzph1	2	gene-cldn11a/gene-pdzph1	0
CC	GO:0019897	extrinsic component of plasma membrane	1/255	36/15597	0.447947210184999	0.865620588391111	gene-cnksr1	1	cnksr1	0	-	1
CC	GO:0031674	I band	1/255	36/15597	0.447947210184999	0.865620588391111	gene-parvb	1	parvb	1	gene-parvb	0
CC	GO:0099023	vesicle tethering complex	1/255	36/15597	0.447947210184999	0.865620588391111	gene-si:dkey-196h17.9	1	si:dkey-196h17.9	1	gene-si:dkey-196h17.9	0
CC	GO:0098793	presynapse	2/255	95/15597	0.461856064762141	0.865620588391111	gene-pclob/gene-LOC122871213	2	LOC122871213/pclob	1	gene-pclob	1
CC	GO:0005795	Golgi stack	1/255	38/15597	0.46589264748656	0.865620588391111	gene-LOC122876915	1	LOC122876915	1	gene-LOC122876915	0
CC	GO:0098794	postsynapse	4/255	215/15597	0.468286547818142	0.865620588391111	gene-chrna3/gene-si:dkey-91m11.5/gene-LOC122883451/gene-cnksr1	4	chrna3/cnksr1/LOC122883451/si:dkey-91m11.5	0	-	4
CC	GO:0008021	synaptic vesicle	1/255	41/15597	0.491727058982972	0.895383599939143	gene-LOC122871213	1	LOC122871213	0	-	1
CC	GO:0005604	basement membrane	1/255	42/15597	0.500058866642996	0.897164437212435	gene-lamb3	1	lamb3	1	gene-lamb3	0
CC	GO:0070382	exocytic vesicle	1/255	44/15597	0.516316540836337	0.903542652069407	gene-LOC122871213	1	LOC122871213	0	-	1
CC	GO:0001726	ruffle	1/255	47/15597	0.539720859921332	0.903542652069407	gene-LOC122867164	1	LOC122867164	0	-	1
CC	GO:0098858	actin-based cell projection	1/255	49/15597	0.554693531929187	0.903542652069407	gene-cd44b	1	cd44b	0	-	1
CC	GO:0070603	SWI/SNF superfamily-type complex	1/255	50/15597	0.561996924607219	0.903542652069407	gene-dpf1	1	dpf1	1	gene-dpf1	0
CC	GO:0036477	somatodendritic compartment	2/255	116/15597	0.56830774324269	0.903542652069407	gene-si:dkey-91m11.5/gene-cnksr1	2	cnksr1/si:dkey-91m11.5	0	-	2
CC	GO:0016469	proton-transporting two-sector ATPase complex	1/255	51/15597	0.569180997690461	0.903542652069407	gene-atp6v1c1b	1	atp6v1c1b	1	gene-atp6v1c1b	0
CC	GO:0030136	clathrin-coated vesicle	1/255	51/15597	0.569180997690461	0.903542652069407	gene-LOC122888042	1	LOC122888042	1	gene-LOC122888042	0
CC	GO:0043025	neuronal cell body	1/255	53/15597	0.583198920956693	0.903542652069407	gene-cnksr1	1	cnksr1	0	-	1
CC	GO:0009986	cell surface	1/255	54/15597	0.590036560892105	0.903542652069407	gene-LOC122883012	1	LOC122883012	1	gene-LOC122883012	0
CC	GO:0014069	postsynaptic density	1/255	57/15597	0.60988629248065	0.903542652069407	gene-cnksr1	1	cnksr1	0	-	1
CC	GO:0032279	asymmetric synapse	1/255	57/15597	0.60988629248065	0.903542652069407	gene-cnksr1	1	cnksr1	0	-	1
CC	GO:0044297	cell body	1/255	57/15597	0.60988629248065	0.903542652069407	gene-cnksr1	1	cnksr1	0	-	1
CC	GO:0098984	neuron to neuron synapse	1/255	58/15597	0.616287772237242	0.903542652069407	gene-cnksr1	1	cnksr1	0	-	1
CC	GO:0099572	postsynaptic specialization	1/255	58/15597	0.616287772237242	0.903542652069407	gene-cnksr1	1	cnksr1	0	-	1
CC	GO:1904949	ATPase complex	1/255	60/15597	0.628778520388083	0.903542652069407	gene-dpf1	1	dpf1	1	gene-dpf1	0
CC	GO:0031225	anchored component of membrane	1/255	64/15597	0.652557919522593	0.903542652069407	gene-LOC122873566	1	LOC122873566	0	-	1
CC	GO:0098552	side of membrane	1/255	64/15597	0.652557919522593	0.903542652069407	gene-LOC122883012	1	LOC122883012	1	gene-LOC122883012	0
CC	GO:0000323	lytic vacuole	2/255	136/15597	0.654829608895624	0.903542652069407	gene-LOC122876711/gene-sqstm1	2	LOC122876711/sqstm1	2	gene-LOC122876711/gene-sqstm1	0
CC	GO:0005764	lysosome	2/255	136/15597	0.654829608895624	0.903542652069407	gene-LOC122876711/gene-sqstm1	2	LOC122876711/sqstm1	2	gene-LOC122876711/gene-sqstm1	0
CC	GO:0030659	cytoplasmic vesicle membrane	2/255	138/15597	0.662677695631164	0.903542652069407	gene-myofl/Novel.22	2	myofl/Novel.22	1	Novel.22	1
CC	GO:0061695	transferase complex, transferring phosphorus-containing groups	1/255	66/15597	0.663872320647396	0.903542652069407	gene-LOC122873544	1	LOC122873544	1	gene-LOC122873544	0
CC	GO:0012506	vesicle membrane	2/255	139/15597	0.666547858083989	0.903542652069407	gene-myofl/Novel.22	2	myofl/Novel.22	1	Novel.22	1
CC	GO:0005815	microtubule organizing center	4/255	280/15597	0.675137911881027	0.905129947796541	gene-wu:fa11c10/gene-LOC122886404/gene-pdzph1/gene-ppp1r42	4	LOC122886404/pdzph1/ppp1r42/wu:fa11c10	2	gene-LOC122886404/gene-pdzph1	2
CC	GO:0005813	centrosome	2/255	150/15597	0.706790676212824	0.922463196302649	gene-pdzph1/gene-ppp1r42	2	pdzph1/ppp1r42	1	gene-pdzph1	1
CC	GO:0030017	sarcomere	1/255	78/15597	0.724452665619885	0.922463196302649	gene-parvb	1	parvb	1	gene-parvb	0
CC	GO:0099503	secretory vesicle	1/255	79/15597	0.728980313681418	0.922463196302649	gene-LOC122871213	1	LOC122871213	0	-	1
CC	GO:0030016	myofibril	1/255	80/15597	0.733433852798008	0.922463196302649	gene-parvb	1	parvb	1	gene-parvb	0
CC	GO:0030135	coated vesicle	1/255	80/15597	0.733433852798008	0.922463196302649	gene-LOC122888042	1	LOC122888042	1	gene-LOC122888042	0
CC	GO:0043292	contractile fiber	1/255	80/15597	0.733433852798008	0.922463196302649	gene-parvb	1	parvb	1	gene-parvb	0
CC	GO:0005923	bicellular tight junction	1/255	85/15597	0.754631525311024	0.928386810732585	gene-cldn11a	1	cldn11a	1	gene-cldn11a	0
CC	GO:0070160	tight junction	1/255	85/15597	0.754631525311024	0.928386810732585	gene-cldn11a	1	cldn11a	1	gene-cldn11a	0
CC	GO:0005773	vacuole	2/255	167/15597	0.760972795682447	0.928386810732585	gene-LOC122876711/gene-sqstm1	2	LOC122876711/sqstm1	2	gene-LOC122876711/gene-sqstm1	0
CC	GO:0030425	dendrite	1/255	92/15597	0.781516630564587	0.934755185577251	gene-si:dkey-91m11.5	1	si:dkey-91m11.5	0	-	1
CC	GO:0097447	dendritic tree	1/255	92/15597	0.781516630564587	0.934755185577251	gene-si:dkey-91m11.5	1	si:dkey-91m11.5	0	-	1
CC	GO:0005694	chromosome	5/255	405/15597	0.795553861765451	0.942306515877525	gene-LOC122877917/gene-dpf1/gene-tex11/gene-snai2/gene-wbp2	5	dpf1/LOC122877917/snai2/tex11/wbp2	3	gene-dpf1/gene-LOC122877917/gene-wbp2	2
CC	GO:0005769	early endosome	1/255	104/15597	0.820954118852585	0.963042331730916	gene-wdfy4	1	wdfy4	1	gene-wdfy4	0
CC	GO:0098590	plasma membrane region	3/255	315/15597	0.891851925611879	0.999074401028219	gene-chrna3/gene-LOC122883451/gene-cnksr1	3	chrna3/cnksr1/LOC122883451	0	-	3
CC	GO:0000139	Golgi membrane	2/255	244/15597	0.911150899547916	0.999074401028219	gene-xylt1/gene-LOC122876915	2	LOC122876915/xylt1	1	gene-LOC122876915	1
CC	GO:0048471	perinuclear region of cytoplasm	1/255	157/15597	0.925814981671033	0.999074401028219	gene-sh3rf1	1	sh3rf1	0	-	1
CC	GO:0034702	ion channel complex	1/255	160/15597	0.929430459130998	0.999074401028219	gene-LOC122883451	1	LOC122883451	0	-	1
CC	GO:0005768	endosome	2/255	269/15597	0.936662363315253	0.999074401028219	gene-htr4/gene-wdfy4	2	htr4/wdfy4	1	gene-wdfy4	1
CC	GO:1902495	transmembrane transporter complex	1/255	170/15597	0.940261151318283	0.999074401028219	gene-LOC122883451	1	LOC122883451	0	-	1
CC	GO:1990351	transporter complex	1/255	171/15597	0.941248602307706	0.999074401028219	gene-LOC122883451	1	LOC122883451	0	-	1
CC	GO:0098791	Golgi apparatus subcompartment	2/255	284/15597	0.948465720021807	0.999074401028219	gene-xylt1/gene-LOC122876915	2	LOC122876915/xylt1	1	gene-LOC122876915	1
CC	GO:0005789	endoplasmic reticulum membrane	3/255	381/15597	0.950773147663998	0.999074401028219	gene-soat1/gene-LOC122883333/gene-LOC122863823	3	LOC122863823/LOC122883333/soat1	2	gene-LOC122883333/gene-soat1	1
CC	GO:0098827	endoplasmic reticulum subcompartment	3/255	381/15597	0.950773147663998	0.999074401028219	gene-soat1/gene-LOC122883333/gene-LOC122863823	3	LOC122863823/LOC122883333/soat1	2	gene-LOC122883333/gene-soat1	1
CC	GO:0042175	nuclear outer membrane-endoplasmic reticulum membrane network	3/255	392/15597	0.957037905866879	0.999074401028219	gene-soat1/gene-LOC122883333/gene-LOC122863823	3	LOC122863823/LOC122883333/soat1	2	gene-LOC122883333/gene-soat1	1
CC	GO:0005874	microtubule	1/255	226/15597	0.976548950654171	0.999074401028219	gene-map1aa	1	map1aa	1	gene-map1aa	0
CC	GO:0031966	mitochondrial membrane	1/255	295/15597	0.992625387224202	0.999074401028219	gene-LOC122888793	1	LOC122888793	1	gene-LOC122888793	0
CC	GO:1990234	transferase complex	1/255	314/15597	0.994642161105792	0.999074401028219	gene-LOC122873544	1	LOC122873544	1	gene-LOC122873544	0
CC	GO:0005740	mitochondrial envelope	1/255	332/15597	0.996042853413817	0.999074401028219	gene-LOC122888793	1	LOC122888793	1	gene-LOC122888793	0
CC	GO:0140513	nuclear protein-containing complex	2/255	490/15597	0.997434917373895	0.999074401028219	gene-dpf1/gene-hdac9b	2	dpf1/hdac9b	2	gene-dpf1/gene-hdac9b	0
CC	GO:0031967	organelle envelope	1/255	418/15597	0.999074401028219	0.999074401028219	gene-LOC122888793	1	LOC122888793	1	gene-LOC122888793	0
CC	GO:0031975	envelope	1/255	418/15597	0.999074401028219	0.999074401028219	gene-LOC122888793	1	LOC122888793	1	gene-LOC122888793	0
MF	GO:0030546	signaling receptor activator activity	13/235	317/15230	0.00132273889030241	0.11000772240457	gene-LOC122873767/gene-metrnlb/gene-LOC122876711/gene-il15l/gene-LOC122884604/gene-LOC122888056/gene-tgfb3/gene-bmp6/gene-prlh2/gene-LOC122868714/gene-pyya/gene-pthlha/gene-LOC122872036	13	bmp6/il15l/LOC122868714/LOC122872036/LOC122873767/LOC122876711/LOC122884604/LOC122888056/metrnlb/prlh2/pthlha/pyya/tgfb3	7	gene-LOC122873767/gene-LOC122876711/gene-LOC122884604/gene-LOC122888056/gene-metrnlb/gene-prlh2/gene-pyya	6
MF	GO:0048018	receptor ligand activity	13/235	317/15230	0.00132273889030241	0.11000772240457	gene-LOC122873767/gene-metrnlb/gene-LOC122876711/gene-il15l/gene-LOC122884604/gene-LOC122888056/gene-tgfb3/gene-bmp6/gene-prlh2/gene-LOC122868714/gene-pyya/gene-pthlha/gene-LOC122872036	13	bmp6/il15l/LOC122868714/LOC122872036/LOC122873767/LOC122876711/LOC122884604/LOC122888056/metrnlb/prlh2/pthlha/pyya/tgfb3	7	gene-LOC122873767/gene-LOC122876711/gene-LOC122884604/gene-LOC122888056/gene-metrnlb/gene-prlh2/gene-pyya	6
MF	GO:0030545	receptor regulator activity	13/235	322/15230	0.00152135496941215	0.11000772240457	gene-LOC122873767/gene-metrnlb/gene-LOC122876711/gene-il15l/gene-LOC122884604/gene-LOC122888056/gene-tgfb3/gene-bmp6/gene-prlh2/gene-LOC122868714/gene-pyya/gene-pthlha/gene-LOC122872036	13	bmp6/il15l/LOC122868714/LOC122872036/LOC122873767/LOC122876711/LOC122884604/LOC122888056/metrnlb/prlh2/pthlha/pyya/tgfb3	7	gene-LOC122873767/gene-LOC122876711/gene-LOC122884604/gene-LOC122888056/gene-metrnlb/gene-prlh2/gene-pyya	6
MF	GO:0005520	insulin-like growth factor binding	4/235	34/15230	0.00178150157740195	0.11000772240457	gene-LOC122873543/gene-ccn1/gene-igfbp6b/gene-ccn2a	4	ccn1/ccn2a/igfbp6b/LOC122873543	1	gene-LOC122873543	3
MF	GO:0005201	extracellular matrix structural constituent	5/235	62/15230	0.00265323949850444	0.131070031226119	gene-lamb3/gene-soat1/gene-matn1/gene-col1a1b/gene-dcn	5	col1a1b/dcn/lamb3/matn1/soat1	5	gene-col1a1b/gene-dcn/gene-lamb3/gene-matn1/gene-soat1	0
MF	GO:0005126	cytokine receptor binding	6/235	96/15230	0.00369800885854033	0.15223469800991	gene-LOC122873767/gene-LOC122876711/gene-il15l/gene-LOC122884604/gene-LOC122888056/gene-tgfb3	6	il15l/LOC122873767/LOC122876711/LOC122884604/LOC122888056/tgfb3	4	gene-LOC122873767/gene-LOC122876711/gene-LOC122884604/gene-LOC122888056	2
MF	GO:0019838	growth factor binding	4/235	45/15230	0.0050155727983197	0.176978068740709	gene-LOC122873543/gene-ccn1/gene-igfbp6b/gene-ccn2a	4	ccn1/ccn2a/igfbp6b/LOC122873543	1	gene-LOC122873543	3
MF	GO:0005179	hormone activity	6/235	117/15230	0.00956651286812506	0.264613232327132	gene-metrnlb/gene-prlh2/gene-LOC122868714/gene-pyya/gene-pthlha/gene-LOC122872036	6	LOC122868714/LOC122872036/metrnlb/prlh2/pthlha/pyya	3	gene-metrnlb/gene-prlh2/gene-pyya	3
MF	GO:0005125	cytokine activity	5/235	84/15230	0.00964177769613031	0.264613232327132	gene-LOC122873767/gene-LOC122876711/gene-il15l/gene-LOC122884604/gene-LOC122888056	5	il15l/LOC122873767/LOC122876711/LOC122884604/LOC122888056	4	gene-LOC122873767/gene-LOC122876711/gene-LOC122884604/gene-LOC122888056	1
MF	GO:0004714	transmembrane receptor protein tyrosine kinase activity	6/235	121/15230	0.0111781394782785	0.272183565184614	gene-tie1/gene-kdrl/gene-epha2b/gene-fgfr4/gene-fgfr3/Novel.146	6	epha2b/fgfr3/fgfr4/kdrl/tie1/Novel.146	0	-	6
MF	GO:0004713	protein tyrosine kinase activity	6/235	126/15230	0.0134515296155193	0.272183565184614	gene-tie1/gene-kdrl/gene-epha2b/gene-fgfr4/gene-fgfr3/Novel.146	6	epha2b/fgfr3/fgfr4/kdrl/tie1/Novel.146	0	-	6
MF	GO:0004954	prostanoid receptor activity	2/235	12/15230	0.0141312234433698	0.272183565184614	gene-tbxa2r/gene-ptger3	2	ptger3/tbxa2r	0	-	2
MF	GO:0003779	actin binding	12/235	377/15230	0.0143254507991902	0.272183565184614	gene-LOC122873669/gene-parvb/gene-tpm1/gene-LOC122880325/gene-tpm4b/gene-clmna/gene-myh6/gene-cap2/gene-ppp1r42/gene-myo1d/gene-LOC122867469/gene-LOC122867164	12	cap2/clmna/LOC122867164/LOC122867469/LOC122873669/LOC122880325/myh6/myo1d/parvb/ppp1r42/tpm1/tpm4b	2	gene-LOC122880325/gene-parvb	10
MF	GO:0008009	chemokine activity	3/235	39/15230	0.0220387573244613	0.358519082525727	gene-LOC122873767/gene-LOC122884604/gene-LOC122888056	3	LOC122873767/LOC122884604/LOC122888056	3	gene-LOC122873767/gene-LOC122884604/gene-LOC122888056	0
MF	GO:0019199	transmembrane receptor protein kinase activity	6/235	142/15230	0.0228653727284939	0.358519082525727	gene-tie1/gene-kdrl/gene-epha2b/gene-fgfr4/gene-fgfr3/Novel.146	6	epha2b/fgfr3/fgfr4/kdrl/tie1/Novel.146	0	-	6
MF	GO:0042379	chemokine receptor binding	3/235	40/15230	0.0235608386340778	0.358519082525727	gene-LOC122873767/gene-LOC122884604/gene-LOC122888056	3	LOC122873767/LOC122884604/LOC122888056	3	gene-LOC122873767/gene-LOC122884604/gene-LOC122888056	0
MF	GO:0004953	icosanoid receptor activity	2/235	16/15230	0.024675402441042	0.358519082525727	gene-tbxa2r/gene-ptger3	2	ptger3/tbxa2r	0	-	2
MF	GO:0008237	metallopeptidase activity	7/235	205/15230	0.0400103756394288	0.532800548384609	gene-LOC122873417/gene-ece1/gene-LOC122879137/gene-mmp9/gene-cpxm1a/gene-LOC122868964/gene-LOC122872158	7	cpxm1a/ece1/LOC122868964/LOC122872158/LOC122873417/LOC122879137/mmp9	5	gene-cpxm1a/gene-ece1/gene-LOC122873417/gene-LOC122879137/gene-mmp9	2
MF	GO:0001664	G protein-coupled receptor binding	4/235	85/15230	0.0424531492970895	0.532800548384609	gene-LOC122873767/gene-LOC122884604/gene-LOC122888056/gene-LOC122863926	4	LOC122863926/LOC122873767/LOC122884604/LOC122888056	4	gene-LOC122863926/gene-LOC122873767/gene-LOC122884604/gene-LOC122888056	0
MF	GO:0004222	metalloendopeptidase activity	5/235	124/15230	0.0431417448084703	0.532800548384609	gene-ece1/gene-LOC122879137/gene-mmp9/gene-LOC122868964/gene-LOC122872158	5	ece1/LOC122868964/LOC122872158/LOC122879137/mmp9	3	gene-ece1/gene-LOC122879137/gene-mmp9	2
MF	GO:0005003	ephrin receptor activity	2/235	23/15230	0.048496057898747	0.562510302696433	gene-epha2b/Novel.146	2	epha2b/Novel.146	0	-	2
MF	GO:0001637	G protein-coupled chemoattractant receptor activity	2/235	24/15230	0.052379501870518	0.562510302696433	gene-LOC122881975/gene-LOC122881976	2	LOC122881975/LOC122881976	2	gene-LOC122881975/gene-LOC122881976	0
MF	GO:0004950	chemokine receptor activity	2/235	24/15230	0.052379501870518	0.562510302696433	gene-LOC122881975/gene-LOC122881976	2	LOC122881975/LOC122881976	2	gene-LOC122881975/gene-LOC122881976	0
MF	GO:0005540	hyaluronic acid binding	2/235	26/15230	0.0604624600192792	0.595476423404902	gene-cd44b/gene-tnfaip6	2	cd44b/tnfaip6	1	gene-tnfaip6	1
MF	GO:0019239	deaminase activity	2/235	27/15230	0.0646537020199488	0.595476423404902	gene-ampd3a/gene-cdab	2	ampd3a/cdab	1	gene-cdab	1
MF	GO:0061629	RNA polymerase II-specific DNA-binding transcription factor binding	2/235	27/15230	0.0646537020199488	0.595476423404902	gene-snai1a/gene-LOC122877917	2	LOC122877917/snai1a	1	gene-LOC122877917	1
MF	GO:0008081	phosphoric diester hydrolase activity	4/235	98/15230	0.0650925645017505	0.595476423404902	gene-pde4ba/gene-smpdl3b/gene-pde10a/gene-LOC122871826	4	LOC122871826/pde10a/pde4ba/smpdl3b	0	-	4
MF	GO:0044877	protein-containing complex binding	8/235	279/15230	0.0680408515472286	0.600217511863053	gene-lamb3/gene-LOC122873669/gene-LOC122880325/gene-LOC122888653/gene-myh6/gene-ppp1r42/gene-LOC122867164/gene-dcn	8	dcn/lamb3/LOC122867164/LOC122873669/LOC122880325/LOC122888653/myh6/ppp1r42	4	gene-dcn/gene-lamb3/gene-LOC122880325/gene-LOC122888653	4
MF	GO:0004896	cytokine receptor activity	3/235	65/15230	0.0790093098381403	0.623545028612346	gene-lepr/gene-LOC122881975/gene-LOC122881976	3	lepr/LOC122881975/LOC122881976	3	gene-lepr/gene-LOC122881975/gene-LOC122881976	0
MF	GO:0015631	tubulin binding	6/235	195/15230	0.0819389308669502	0.623545028612346	gene-map1aa/gene-LOC122875409/gene-fmn2a/gene-LOC122861414/gene-kif26bb/gene-ppp1r42	6	fmn2a/kif26bb/LOC122861414/LOC122875409/map1aa/ppp1r42	4	gene-kif26bb/gene-LOC122861414/gene-LOC122875409/gene-map1aa	2
MF	GO:0016810	hydrolase activity, acting on carbon-nitrogen (but not peptide) bonds	4/235	107/15230	0.0837969926633829	0.623545028612346	gene-ampd3a/gene-cdab/gene-ddah1/gene-hdac9b	4	ampd3a/cdab/ddah1/hdac9b	2	gene-cdab/gene-hdac9b	2
MF	GO:0140375	immune receptor activity	3/235	69/15230	0.0907223412155291	0.623545028612346	gene-lepr/gene-LOC122881975/gene-LOC122881976	3	lepr/LOC122881975/LOC122881976	3	gene-lepr/gene-LOC122881975/gene-LOC122881976	0
MF	GO:0016814	hydrolase activity, acting on carbon-nitrogen (but not peptide) bonds, in cyclic amidines	2/235	33/15230	0.0916529235226933	0.623545028612346	gene-ampd3a/gene-cdab	2	ampd3a/cdab	1	gene-cdab	1
MF	GO:0030695	GTPase regulator activity	10/235	400/15230	0.0918163317684744	0.623545028612346	gene-si:dkey-91m11.5/gene-arhgap25/gene-LOC122879463/gene-rgl2/gene-rasgrp3/gene-arfgef3/gene-arhgap24/gene-rundc1/gene-LOC122869789/gene-tbc1d30	10	arfgef3/arhgap24/arhgap25/LOC122869789/LOC122879463/rasgrp3/rgl2/rundc1/si:dkey-91m11.5/tbc1d30	7	gene-arfgef3/gene-arhgap25/gene-LOC122869789/gene-rasgrp3/gene-rgl2/gene-rundc1/gene-tbc1d30	3
MF	GO:0022848	acetylcholine-gated cation-selective channel activity	2/235	34/15230	0.0964273534489061	0.623545028612346	gene-chrna3/gene-LOC122883451	2	chrna3/LOC122883451	0	-	2
MF	GO:0099529	neurotransmitter receptor activity involved in regulation of postsynaptic membrane potential	2/235	34/15230	0.0964273534489061	0.623545028612346	gene-chrna3/gene-LOC122883451	2	chrna3/LOC122883451	0	-	2
MF	GO:1904315	transmitter-gated ion channel activity involved in regulation of postsynaptic membrane potential	2/235	34/15230	0.0964273534489061	0.623545028612346	gene-chrna3/gene-LOC122883451	2	chrna3/LOC122883451	0	-	2
MF	GO:0051015	actin filament binding	4/235	114/15230	0.0999659398426608	0.623545028612346	gene-LOC122873669/gene-LOC122880325/gene-myh6/gene-LOC122867164	4	LOC122867164/LOC122873669/LOC122880325/myh6	1	gene-LOC122880325	3
MF	GO:0050839	cell adhesion molecule binding	2/235	35/15230	0.101271038448789	0.623545028612346	gene-LOC122878341/gene-LOC122888653	2	LOC122878341/LOC122888653	1	gene-LOC122888653	1
MF	GO:0019207	kinase regulator activity	3/235	73/15230	0.103110090052591	0.623545028612346	gene-LOC122873544/gene-LOC122877917/gene-pkig	3	LOC122873544/LOC122877917/pkig	3	gene-LOC122873544/gene-LOC122877917/gene-pkig	0
MF	GO:0004114	3',5'-cyclic-nucleotide phosphodiesterase activity	2/235	36/15230	0.106180727247134	0.623545028612346	gene-pde4ba/gene-pde10a	2	pde10a/pde4ba	0	-	2
MF	GO:0060589	nucleoside-triphosphatase regulator activity	10/235	413/15230	0.107327558234785	0.623545028612346	gene-si:dkey-91m11.5/gene-arhgap25/gene-LOC122879463/gene-rgl2/gene-rasgrp3/gene-arfgef3/gene-arhgap24/gene-rundc1/gene-LOC122869789/gene-tbc1d30	10	arfgef3/arhgap24/arhgap25/LOC122869789/LOC122879463/rasgrp3/rgl2/rundc1/si:dkey-91m11.5/tbc1d30	7	gene-arfgef3/gene-arhgap25/gene-LOC122869789/gene-rasgrp3/gene-rgl2/gene-rundc1/gene-tbc1d30	3
MF	GO:0008017	microtubule binding	5/235	164/15230	0.110285193447317	0.623545028612346	gene-map1aa/gene-LOC122875409/gene-fmn2a/gene-LOC122861414/gene-kif26bb	5	fmn2a/kif26bb/LOC122861414/LOC122875409/map1aa	4	gene-kif26bb/gene-LOC122861414/gene-LOC122875409/gene-map1aa	1
MF	GO:0004112	cyclic-nucleotide phosphodiesterase activity	2/235	37/15230	0.111153251642164	0.623545028612346	gene-pde4ba/gene-pde10a	2	pde10a/pde4ba	0	-	2
MF	GO:0005085	guanyl-nucleotide exchange factor activity	6/235	214/15230	0.114313548561894	0.623545028612346	gene-si:dkey-91m11.5/gene-LOC122879463/gene-rgl2/gene-rasgrp3/gene-arfgef3/gene-LOC122869789	6	arfgef3/LOC122869789/LOC122879463/rasgrp3/rgl2/si:dkey-91m11.5	4	gene-arfgef3/gene-LOC122869789/gene-rasgrp3/gene-rgl2	2
MF	GO:0030674	protein-macromolecule adaptor activity	3/235	77/15230	0.116125794802299	0.623545028612346	gene-LOC122873669/gene-tsnare1/gene-LOC122883326	3	LOC122873669/LOC122883326/tsnare1	2	gene-LOC122883326/gene-tsnare1	1
MF	GO:0008238	exopeptidase activity	3/235	80/15230	0.12627071777216	0.647080462698648	gene-LOC122873417/gene-scrn2/gene-cpxm1a	3	cpxm1a/LOC122873417/scrn2	3	gene-cpxm1a/gene-LOC122873417/gene-scrn2	0
MF	GO:0004955	prostaglandin receptor activity	1/235	10/15230	0.144055611904417	0.647080462698648	gene-ptger3	1	ptger3	0	-	1
MF	GO:0070840	dynein complex binding	1/235	10/15230	0.144055611904417	0.647080462698648	gene-ppp1r42	1	ppp1r42	0	-	1
MF	GO:0005539	glycosaminoglycan binding	3/235	86/15230	0.147456224996056	0.647080462698648	gene-cd44b/gene-ndnf/gene-tnfaip6	3	cd44b/ndnf/tnfaip6	1	gene-tnfaip6	2
MF	GO:0140297	DNA-binding transcription factor binding	2/235	44/15230	0.147470832960248	0.647080462698648	gene-snai1a/gene-LOC122877917	2	LOC122877917/snai1a	1	gene-LOC122877917	1
MF	GO:0003810	protein-glutamine gamma-glutamyltransferase activity	1/235	11/15230	0.157271573218639	0.647080462698648	gene-tgm2b	1	tgm2b	0	-	1
MF	GO:0031078	histone deacetylase activity (H3-K14 specific)	1/235	11/15230	0.157271573218639	0.647080462698648	gene-hdac9b	1	hdac9b	1	gene-hdac9b	0
MF	GO:0032041	NAD-dependent histone deacetylase activity (H3-K14 specific)	1/235	11/15230	0.157271573218639	0.647080462698648	gene-hdac9b	1	hdac9b	1	gene-hdac9b	0
MF	GO:0046332	SMAD binding	1/235	11/15230	0.157271573218639	0.647080462698648	gene-skib	1	skib	0	-	1
MF	GO:0070325	lipoprotein particle receptor binding	1/235	11/15230	0.157271573218639	0.647080462698648	gene-reln	1	reln	0	-	1
MF	GO:0008194	UDP-glycosyltransferase activity	3/235	89/15230	0.158455227084176	0.647080462698648	gene-xylt1/gene-LOC122876915/gene-LOC122863823	3	LOC122863823/LOC122876915/xylt1	1	gene-LOC122876915	2
MF	GO:0003714	transcription corepressor activity	2/235	47/15230	0.163693401776264	0.647080462698648	gene-LOC122888999/gene-jazf1a	2	jazf1a/LOC122888999	0	-	2
MF	GO:0005231	excitatory extracellular ligand-gated ion channel activity	2/235	48/15230	0.169170069521529	0.647080462698648	gene-chrna3/gene-LOC122883451	2	chrna3/LOC122883451	0	-	2
MF	GO:0098960	postsynaptic neurotransmitter receptor activity	2/235	48/15230	0.169170069521529	0.647080462698648	gene-chrna3/gene-LOC122883451	2	chrna3/LOC122883451	0	-	2
MF	GO:0005178	integrin binding	1/235	12/15230	0.170284332289118	0.647080462698648	gene-LOC122888653	1	LOC122888653	1	gene-LOC122888653	0
MF	GO:0015269	calcium-activated potassium channel activity	1/235	12/15230	0.170284332289118	0.647080462698648	gene-kcnn3	1	kcnn3	1	gene-kcnn3	0
MF	GO:0015464	acetylcholine receptor activity	1/235	12/15230	0.170284332289118	0.647080462698648	gene-LOC122883451	1	LOC122883451	0	-	1
MF	GO:0017136	NAD-dependent histone deacetylase activity	1/235	12/15230	0.170284332289118	0.647080462698648	gene-hdac9b	1	hdac9b	1	gene-hdac9b	0
MF	GO:0042910	xenobiotic transmembrane transporter activity	1/235	12/15230	0.170284332289118	0.647080462698648	gene-slc47a3	1	slc47a3	1	gene-slc47a3	0
MF	GO:0004709	MAP kinase kinase kinase activity	1/235	13/15230	0.183097000308046	0.674999389195335	gene-map3k5	1	map3k5	0	-	1
MF	GO:0005518	collagen binding	1/235	13/15230	0.183097000308046	0.674999389195335	gene-dcn	1	dcn	1	gene-dcn	0
MF	GO:0004407	histone deacetylase activity	1/235	14/15230	0.195712641034051	0.694281830092307	gene-hdac9b	1	hdac9b	1	gene-hdac9b	0
MF	GO:0042826	histone deacetylase binding	1/235	14/15230	0.195712641034051	0.694281830092307	gene-LOC122877917	1	LOC122877917	1	gene-LOC122877917	0
MF	GO:0060090	molecular adaptor activity	3/235	99/15230	0.196760032819682	0.694281830092307	gene-LOC122873669/gene-tsnare1/gene-LOC122883326	3	LOC122873669/LOC122883326/tsnare1	2	gene-LOC122883326/gene-tsnare1	1
MF	GO:0004652	polynucleotide adenylyltransferase activity	1/235	15/15230	0.208134271512297	0.694692755664488	gene-tent5bb	1	tent5bb	0	-	1
MF	GO:0016307	phosphatidylinositol phosphate kinase activity	1/235	15/15230	0.208134271512297	0.694692755664488	gene-pip5k1bb	1	pip5k1bb	0	-	1
MF	GO:0034979	NAD-dependent protein deacetylase activity	1/235	15/15230	0.208134271512297	0.694692755664488	gene-hdac9b	1	hdac9b	1	gene-hdac9b	0
MF	GO:0004993	G protein-coupled serotonin receptor activity	1/235	16/15230	0.220364862783715	0.694692755664488	gene-htr4	1	htr4	0	-	1
MF	GO:0017017	MAP kinase tyrosine/serine/threonine phosphatase activity	1/235	16/15230	0.220364862783715	0.694692755664488	gene-dusp5	1	dusp5	1	gene-dusp5	0
MF	GO:0033549	MAP kinase phosphatase activity	1/235	16/15230	0.220364862783715	0.694692755664488	gene-dusp5	1	dusp5	1	gene-dusp5	0
MF	GO:0099589	serotonin receptor activity	1/235	16/15230	0.220364862783715	0.694692755664488	gene-htr4	1	htr4	0	-	1
MF	GO:0000976	transcription regulatory region sequence-specific DNA binding	6/235	264/15230	0.223987480824299	0.694692755664488	gene-LOC122877917/gene-zbtb46/gene-snai2/gene-irf1b/gene-mef2ca/gene-irf3	6	irf1b/irf3/LOC122877917/mef2ca/snai2/zbtb46	4	gene-irf1b/gene-irf3/gene-LOC122877917/gene-mef2ca	2
MF	GO:0001067	regulatory region nucleic acid binding	6/235	264/15230	0.223987480824299	0.694692755664488	gene-LOC122877917/gene-zbtb46/gene-snai2/gene-irf1b/gene-mef2ca/gene-irf3	6	irf1b/irf3/LOC122877917/mef2ca/snai2/zbtb46	4	gene-irf1b/gene-irf3/gene-LOC122877917/gene-mef2ca	2
MF	GO:0030291	protein serine/threonine kinase inhibitor activity	1/235	17/15230	0.232407340583493	0.694692755664488	gene-pkig	1	pkig	1	gene-pkig	0
MF	GO:1990837	sequence-specific double-stranded DNA binding	6/235	268/15230	0.23398387063486	0.694692755664488	gene-LOC122877917/gene-zbtb46/gene-snai2/gene-irf1b/gene-mef2ca/gene-irf3	6	irf1b/irf3/LOC122877917/mef2ca/snai2/zbtb46	4	gene-irf1b/gene-irf3/gene-LOC122877917/gene-mef2ca	2
MF	GO:0005227	calcium activated cation channel activity	1/235	18/15230	0.244264586029025	0.694692755664488	gene-kcnn3	1	kcnn3	1	gene-kcnn3	0
MF	GO:0016628	oxidoreductase activity, acting on the CH-CH group of donors, NAD or NADP as acceptor	1/235	18/15230	0.244264586029025	0.694692755664488	gene-LOC122871599	1	LOC122871599	1	gene-LOC122871599	0
MF	GO:0016755	transferase activity, transferring amino-acyl groups	1/235	18/15230	0.244264586029025	0.694692755664488	gene-tgm2b	1	tgm2b	0	-	1
MF	GO:0022839	ion gated channel activity	1/235	18/15230	0.244264586029025	0.694692755664488	gene-kcnn3	1	kcnn3	1	gene-kcnn3	0
MF	GO:0033558	protein deacetylase activity	1/235	18/15230	0.244264586029025	0.694692755664488	gene-hdac9b	1	hdac9b	1	gene-hdac9b	0
MF	GO:0004383	guanylate cyclase activity	1/235	19/15230	0.255939436297443	0.694692755664488	gene-npr2	1	npr2	0	-	1
MF	GO:0004707	MAP kinase activity	1/235	19/15230	0.255939436297443	0.694692755664488	gene-LOC122871339	1	LOC122871339	0	-	1
MF	GO:0008013	beta-catenin binding	1/235	19/15230	0.255939436297443	0.694692755664488	gene-LOC122877917	1	LOC122877917	1	gene-LOC122877917	0
MF	GO:0030145	manganese ion binding	1/235	19/15230	0.255939436297443	0.694692755664488	gene-LOC122871826	1	LOC122871826	0	-	1
MF	GO:0047834	D-threo-aldose 1-dehydrogenase activity	1/235	19/15230	0.255939436297443	0.694692755664488	gene-LOC122871599	1	LOC122871599	1	gene-LOC122871599	0
MF	GO:0030551	cyclic nucleotide binding	1/235	20/15230	0.267434685292914	0.708743384779408	gene-gpr157	1	gpr157	1	gene-gpr157	0
MF	GO:0042577	lipid phosphatase activity	1/235	20/15230	0.267434685292914	0.708743384779408	gene-plpp3	1	plpp3	0	-	1
MF	GO:0003730	mRNA 3'-UTR binding	1/235	22/15230	0.28989734265012	0.708743384779408	gene-cpeb1b	1	cpeb1b	1	gene-cpeb1b	0
MF	GO:0008374	O-acyltransferase activity	1/235	22/15230	0.28989734265012	0.708743384779408	gene-soat1	1	soat1	1	gene-soat1	0
MF	GO:0008375	acetylglucosaminyltransferase activity	1/235	22/15230	0.28989734265012	0.708743384779408	gene-LOC122863823	1	LOC122863823	0	-	1
MF	GO:0008483	transaminase activity	1/235	22/15230	0.28989734265012	0.708743384779408	gene-psat1	1	psat1	1	gene-psat1	0
MF	GO:0015020	glucuronosyltransferase activity	1/235	22/15230	0.28989734265012	0.708743384779408	gene-LOC122863823	1	LOC122863823	0	-	1
MF	GO:0042578	phosphoric ester hydrolase activity	8/235	408/15230	0.295379975368361	0.708743384779408	gene-dusp5/gene-pde4ba/gene-plpp3/gene-ppm1lb/gene-smpdl3b/gene-pde10a/gene-ptpro/gene-LOC122871826	8	dusp5/LOC122871826/pde10a/pde4ba/plpp3/ppm1lb/ptpro/smpdl3b	1	gene-dusp5	7
MF	GO:0004181	metallocarboxypeptidase activity	1/235	23/15230	0.300870128320637	0.708743384779408	gene-cpxm1a	1	cpxm1a	1	gene-cpxm1a	0
MF	GO:0005484	SNAP receptor activity	1/235	23/15230	0.300870128320637	0.708743384779408	gene-tsnare1	1	tsnare1	1	gene-tsnare1	0
MF	GO:0016769	transferase activity, transferring nitrogenous groups	1/235	23/15230	0.300870128320637	0.708743384779408	gene-psat1	1	psat1	1	gene-psat1	0
MF	GO:0070566	adenylyltransferase activity	1/235	23/15230	0.300870128320637	0.708743384779408	gene-tent5bb	1	tent5bb	0	-	1
MF	GO:0005096	GTPase activator activity	4/235	182/15230	0.309282969086995	0.708743384779408	gene-arhgap25/gene-arhgap24/gene-rundc1/gene-tbc1d30	4	arhgap24/arhgap25/rundc1/tbc1d30	3	gene-arhgap25/gene-rundc1/gene-tbc1d30	1
MF	GO:0022824	transmitter-gated ion channel activity	2/235	73/15230	0.311074426082902	0.708743384779408	gene-chrna3/gene-LOC122883451	2	chrna3/LOC122883451	0	-	2
MF	GO:0022835	transmitter-gated channel activity	2/235	73/15230	0.311074426082902	0.708743384779408	gene-chrna3/gene-LOC122883451	2	chrna3/LOC122883451	0	-	2
MF	GO:0019213	deacetylase activity	1/235	24/15230	0.311674068601077	0.708743384779408	gene-hdac9b	1	hdac9b	1	gene-hdac9b	0
MF	GO:0035591	signaling adaptor activity	1/235	24/15230	0.311674068601077	0.708743384779408	gene-LOC122883326	1	LOC122883326	1	gene-LOC122883326	0
MF	GO:0042802	identical protein binding	4/235	183/15230	0.312765299356095	0.708743384779408	gene-hspb6/gene-LOC122883294/gene-cnksr1/gene-LOC122867164	4	cnksr1/hspb6/LOC122867164/LOC122883294	0	-	4
MF	GO:0003690	double-stranded DNA binding	6/235	300/15230	0.318070408799092	0.710217579395897	gene-LOC122877917/gene-zbtb46/gene-snai2/gene-irf1b/gene-mef2ca/gene-irf3	6	irf1b/irf3/LOC122877917/mef2ca/snai2/zbtb46	4	gene-irf1b/gene-irf3/gene-LOC122877917/gene-mef2ca	2
MF	GO:0004860	protein kinase inhibitor activity	1/235	25/15230	0.322311750692274	0.710217579395897	gene-pkig	1	pkig	1	gene-pkig	0
MF	GO:0019210	kinase inhibitor activity	1/235	25/15230	0.322311750692274	0.710217579395897	gene-pkig	1	pkig	1	gene-pkig	0
MF	GO:0008083	growth factor activity	3/235	130/15230	0.324917354136584	0.710217579395897	gene-tgfb3/gene-bmp6/gene-LOC122872036	3	bmp6/LOC122872036/tgfb3	0	-	3
MF	GO:0004177	aminopeptidase activity	1/235	28/15230	0.35325253129027	0.765380484462251	gene-LOC122873417	1	LOC122873417	1	gene-LOC122873417	0
MF	GO:0004190	aspartic-type endopeptidase activity	1/235	29/15230	0.36325027205772	0.766861685455187	gene-nrip2	1	nrip2	0	-	1
MF	GO:0005507	copper ion binding	1/235	29/15230	0.36325027205772	0.766861685455187	gene-f5	1	f5	0	-	1
MF	GO:0070001	aspartic-type peptidase activity	1/235	29/15230	0.36325027205772	0.766861685455187	gene-nrip2	1	nrip2	0	-	1
MF	GO:0003774	motor activity	3/235	141/15230	0.371311278893732	0.777236321074169	gene-kif26bb/gene-myh6/gene-myo1d	3	kif26bb/myh6/myo1d	1	gene-kif26bb	2
MF	GO:0008134	transcription factor binding	2/235	85/15230	0.378414046120572	0.780218954217947	gene-snai1a/gene-LOC122877917	2	LOC122877917/snai1a	1	gene-LOC122877917	1
MF	GO:0003697	single-stranded DNA binding	1/235	31/15230	0.382786405366471	0.780218954217947	gene-LOC122871826	1	LOC122871826	0	-	1
MF	GO:0008376	acetylgalactosaminyltransferase activity	1/235	31/15230	0.382786405366471	0.780218954217947	gene-LOC122876915	1	LOC122876915	1	gene-LOC122876915	0
MF	GO:0019901	protein kinase binding	2/235	87/15230	0.389391130790321	0.780218954217947	gene-dok7b/gene-cnksr1	2	cnksr1/dok7b	0	-	2
MF	GO:0004180	carboxypeptidase activity	1/235	32/15230	0.392329480222638	0.780218954217947	gene-cpxm1a	1	cpxm1a	1	gene-cpxm1a	0
MF	GO:0030276	clathrin binding	1/235	32/15230	0.392329480222638	0.780218954217947	gene-LOC122888042	1	LOC122888042	1	gene-LOC122888042	0
MF	GO:0030594	neurotransmitter receptor activity	2/235	88/15230	0.394847648895722	0.780218954217947	gene-chrna3/gene-LOC122883451	2	chrna3/LOC122883451	0	-	2
MF	GO:0099094	ligand-gated cation channel activity	2/235	90/15230	0.405693442357931	0.795287938590548	gene-chrna3/gene-LOC122883451	2	chrna3/LOC122883451	0	-	2
MF	GO:0003712	transcription coregulator activity	3/235	152/15230	0.417100314248334	0.798163564730503	gene-LOC122888999/gene-jazf1a/gene-wbp2	3	jazf1a/LOC122888999/wbp2	1	gene-wbp2	2
MF	GO:0009975	cyclase activity	1/235	35/15230	0.420086086700265	0.798163564730503	gene-npr2	1	npr2	0	-	1
MF	GO:0034062	5'-3' RNA polymerase activity	1/235	35/15230	0.420086086700265	0.798163564730503	gene-SCRV_gp6	1	L	1	gene-SCRV_gp6	0
MF	GO:0097747	RNA polymerase activity	1/235	35/15230	0.420086086700265	0.798163564730503	gene-SCRV_gp6	1	L	1	gene-SCRV_gp6	0
MF	GO:0046983	protein dimerization activity	7/235	403/15230	0.429420921899348	0.809090922426321	gene-LOC122869262/gene-LOC122866214/gene-bhlhe41/gene-hspb6/gene-id2a/gene-heyl/gene-mef2ca	7	bhlhe41/heyl/hspb6/id2a/LOC122866214/LOC122869262/mef2ca	4	gene-bhlhe41/gene-LOC122866214/gene-LOC122869262/gene-mef2ca	3
MF	GO:0019900	kinase binding	2/235	95/15230	0.432388671094228	0.809090922426321	gene-dok7b/gene-cnksr1	2	cnksr1/dok7b	0	-	2
MF	GO:0000977	RNA polymerase II transcription regulatory region sequence-specific DNA binding	4/235	219/15230	0.438312315150098	0.811068091198442	gene-LOC122877917/gene-zbtb46/gene-snai2/gene-mef2ca	4	LOC122877917/mef2ca/snai2/zbtb46	2	gene-LOC122877917/gene-mef2ca	2
MF	GO:0004722	protein serine/threonine phosphatase activity	2/235	97/15230	0.442888098495743	0.811068091198442	gene-dusp5/gene-ppm1lb	2	dusp5/ppm1lb	1	gene-dusp5	1
MF	GO:0016849	phosphorus-oxygen lyase activity	1/235	38/15230	0.446580001631531	0.811068091198442	gene-npr2	1	npr2	0	-	1
MF	GO:0030215	semaphorin receptor binding	1/235	38/15230	0.446580001631531	0.811068091198442	gene-sema6bb	1	sema6bb	0	-	1
MF	GO:0004674	protein serine/threonine kinase activity	6/235	350/15230	0.45527278825503	0.820820282474397	gene-dapk2b/gene-si:dkey-91m11.5/gene-trpm6/gene-camk1gb/gene-map3k5/gene-LOC122871339	6	camk1gb/dapk2b/LOC122871339/map3k5/si:dkey-91m11.5/trpm6	1	gene-camk1gb	5
MF	GO:0008173	RNA methyltransferase activity	1/235	40/15230	0.463569474417918	0.829722175226274	gene-SCRV_gp6	1	L	1	gene-SCRV_gp6	0
MF	GO:0008227	G protein-coupled amine receptor activity	1/235	44/15230	0.496006005631094	0.840191233499488	gene-htr4	1	htr4	0	-	1
MF	GO:1901981	phosphatidylinositol phosphate binding	1/235	44/15230	0.496006005631094	0.840191233499488	gene-phlda1	1	phlda1	0	-	1
MF	GO:0016706	2-oxoglutarate-dependent dioxygenase activity	1/235	45/15230	0.503805201513926	0.840191233499488	Novel.22	1	Novel.22	1	Novel.22	0
MF	GO:0035091	phosphatidylinositol binding	2/235	110/15230	0.508378847561415	0.840191233499488	gene-LOC122888042/gene-phlda1	2	LOC122888042/phlda1	1	gene-LOC122888042	1
MF	GO:0008047	enzyme activator activity	4/235	242/15230	0.515323537004943	0.840191233499488	gene-arhgap25/gene-arhgap24/gene-rundc1/gene-tbc1d30	4	arhgap24/arhgap25/rundc1/tbc1d30	3	gene-arhgap25/gene-rundc1/gene-tbc1d30	1
MF	GO:0003755	peptidyl-prolyl cis-trans isomerase activity	1/235	47/15230	0.519044882017134	0.840191233499488	gene-LOC122863375	1	LOC122863375	1	gene-LOC122863375	0
MF	GO:0070851	growth factor receptor binding	1/235	48/15230	0.526489026963848	0.840191233499488	gene-LOC122876711	1	LOC122876711	1	gene-LOC122876711	0
MF	GO:0016627	oxidoreductase activity, acting on the CH-CH group of donors	1/235	49/15230	0.533818435385894	0.840191233499488	gene-LOC122871599	1	LOC122871599	1	gene-LOC122871599	0
MF	GO:0016859	cis-trans isomerase activity	1/235	49/15230	0.533818435385894	0.840191233499488	gene-LOC122863375	1	LOC122863375	1	gene-LOC122863375	0
MF	GO:0004175	endopeptidase activity	6/235	381/15230	0.537597776583211	0.840191233499488	gene-ece1/gene-LOC122879137/gene-mmp9/gene-LOC122868964/gene-nrip2/gene-LOC122872158	6	ece1/LOC122868964/LOC122872158/LOC122879137/mmp9/nrip2	3	gene-ece1/gene-LOC122879137/gene-mmp9	3
MF	GO:0005198	structural molecule activity	7/235	447/15230	0.537926606832833	0.840191233499488	gene-lamb3/gene-soat1/gene-hspb6/gene-cldn11a/gene-matn1/gene-col1a1b/gene-dcn	7	cldn11a/col1a1b/dcn/hspb6/lamb3/matn1/soat1	6	gene-cldn11a/gene-col1a1b/gene-dcn/gene-lamb3/gene-matn1/gene-soat1	1
MF	GO:0016811	hydrolase activity, acting on carbon-nitrogen (but not peptide) bonds, in linear amides	1/235	50/15230	0.541034868274657	0.840191233499488	gene-hdac9b	1	hdac9b	1	gene-hdac9b	0
MF	GO:0003682	chromatin binding	2/235	118/15230	0.546120603232251	0.840191233499488	gene-LOC122877917/gene-snai2	2	LOC122877917/snai2	1	gene-LOC122877917	1
MF	GO:0008080	N-acetyltransferase activity	1/235	51/15230	0.548140059707823	0.840191233499488	gene-nat14	1	nat14	0	-	1
MF	GO:0016836	hydro-lyase activity	1/235	51/15230	0.548140059707823	0.840191233499488	gene-enosf1	1	enosf1	1	gene-enosf1	0
MF	GO:0005230	extracellular ligand-gated ion channel activity	2/235	119/15230	0.550694571022243	0.840191233499488	gene-chrna3/gene-LOC122883451	2	chrna3/LOC122883451	0	-	2
MF	GO:0005261	cation channel activity	5/235	322/15230	0.557103791152195	0.840191233499488	gene-chrna3/gene-trpm6/gene-kcnn3/gene-LOC122883451/gene-kcnk9	5	chrna3/kcnk9/kcnn3/LOC122883451/trpm6	2	gene-kcnk9/gene-kcnn3	3
MF	GO:0005044	scavenger receptor activity	1/235	53/15230	0.562023522400882	0.840191233499488	gene-si:ch211-136a13.1	1	si:ch211-136a13.1	0	-	1
MF	GO:0106310	protein serine kinase activity	3/235	191/15230	0.567894988758807	0.840191233499488	gene-trpm6/gene-map3k5/gene-LOC122871339	3	LOC122871339/map3k5/trpm6	0	-	3
MF	GO:0001653	peptide receptor activity	2/235	123/15230	0.568665930083129	0.840191233499488	gene-LOC122881975/gene-LOC122881976	2	LOC122881975/LOC122881976	2	gene-LOC122881975/gene-LOC122881976	0
MF	GO:0008528	G protein-coupled peptide receptor activity	2/235	123/15230	0.568665930083129	0.840191233499488	gene-LOC122881975/gene-LOC122881976	2	LOC122881975/LOC122881976	2	gene-LOC122881975/gene-LOC122881976	0
MF	GO:0001227	DNA-binding transcription repressor activity, RNA polymerase II-specific	1/235	54/15230	0.568805130902944	0.840191233499488	gene-snai2	1	snai2	0	-	1
MF	GO:0008235	metalloexopeptidase activity	1/235	54/15230	0.568805130902944	0.840191233499488	gene-cpxm1a	1	cpxm1a	1	gene-cpxm1a	0
MF	GO:0016407	acetyltransferase activity	1/235	54/15230	0.568805130902944	0.840191233499488	gene-nat14	1	nat14	0	-	1
MF	GO:0030246	carbohydrate binding	3/235	194/15230	0.57849143662762	0.840191233499488	gene-adgrl3.1/gene-si:ch211-10a23.2/gene-LOC122870064	3	adgrl3.1/LOC122870064/si:ch211-10a23.2	1	gene-LOC122870064	2
MF	GO:0106311	protein threonine kinase activity	3/235	195/15230	0.58198735867418	0.840191233499488	gene-trpm6/gene-map3k5/gene-LOC122871339	3	LOC122871339/map3k5/trpm6	0	-	3
MF	GO:0001217	DNA-binding transcription repressor activity	1/235	56/15230	0.582056254888991	0.840191233499488	gene-snai2	1	snai2	0	-	1
MF	GO:0004725	protein tyrosine phosphatase activity	2/235	127/15230	0.586114654516952	0.840191233499488	gene-dusp5/gene-ptpro	2	dusp5/ptpro	1	gene-dusp5	1
MF	GO:0003924	GTPase activity	4/235	267/15230	0.59309774556491	0.840191233499488	gene-LOC122874274/gene-rab3ab/gene-rab11al/gene-LOC122868820	4	LOC122868820/LOC122874274/rab11al/rab3ab	2	gene-LOC122874274/gene-rab11al	2
MF	GO:0008138	protein tyrosine/serine/threonine phosphatase activity	1/235	58/15230	0.594901836021984	0.840191233499488	gene-dusp5	1	dusp5	1	gene-dusp5	0
MF	GO:0015297	antiporter activity	1/235	58/15230	0.594901836021984	0.840191233499488	gene-slc47a3	1	slc47a3	1	gene-slc47a3	0
MF	GO:0016835	carbon-oxygen lyase activity	1/235	58/15230	0.594901836021984	0.840191233499488	gene-enosf1	1	enosf1	1	gene-enosf1	0
MF	GO:0004721	phosphoprotein phosphatase activity	3/235	200/15230	0.599191070633583	0.840191233499488	gene-dusp5/gene-ppm1lb/gene-ptpro	3	dusp5/ppm1lb/ptpro	1	gene-dusp5	2
MF	GO:0001228	DNA-binding transcription activator activity, RNA polymerase II-specific	1/235	59/15230	0.601176425300578	0.840191233499488	gene-LOC122877917	1	LOC122877917	1	gene-LOC122877917	0
MF	GO:0005212	structural constituent of eye lens	1/235	59/15230	0.601176425300578	0.840191233499488	gene-hspb6	1	hspb6	0	-	1
MF	GO:0008201	heparin binding	1/235	59/15230	0.601176425300578	0.840191233499488	gene-ndnf	1	ndnf	0	-	1
MF	GO:0001216	DNA-binding transcription activator activity	1/235	60/15230	0.607354234281817	0.840191233499488	gene-LOC122877917	1	LOC122877917	1	gene-LOC122877917	0
MF	GO:0008289	lipid binding	5/235	342/15230	0.610735242528949	0.840191233499488	gene-stard10/gene-LOC122888042/gene-LOC122865700/gene-osbp2a/gene-phlda1	5	LOC122865700/LOC122888042/osbp2a/phlda1/stard10	4	gene-LOC122865700/gene-LOC122888042/gene-osbp2a/gene-stard10	1
MF	GO:0016410	N-acyltransferase activity	1/235	61/15230	0.613436749439613	0.840191233499488	gene-nat14	1	nat14	0	-	1
MF	GO:0016763	transferase activity, transferring pentosyl groups	1/235	61/15230	0.613436749439613	0.840191233499488	gene-xylt1	1	xylt1	0	-	1
MF	GO:0042803	protein homodimerization activity	1/235	61/15230	0.613436749439613	0.840191233499488	gene-hspb6	1	hspb6	0	-	1
MF	GO:0000981	DNA-binding transcription factor activity, RNA polymerase II-specific	7/235	481/15230	0.615779372567019	0.840191233499488	gene-cux2b/gene-LOC122877917/gene-msx3/gene-snai2/gene-hoxa9a/gene-LOC122864057/gene-LOC122868413	7	cux2b/hoxa9a/LOC122864057/LOC122868413/LOC122877917/msx3/snai2	1	gene-LOC122877917	6
MF	GO:0016746	transferase activity, transferring acyl groups	3/235	205/15230	0.615927770894303	0.840191233499488	gene-tgm2b/gene-soat1/gene-nat14	3	nat14/soat1/tgm2b	1	gene-soat1	2
MF	GO:0003729	mRNA binding	1/235	62/15230	0.61942543451323	0.840191233499488	gene-cpeb1b	1	cpeb1b	1	gene-cpeb1b	0
MF	GO:0004842	ubiquitin-protein transferase activity	3/235	207/15230	0.622489861256706	0.840191233499488	gene-LOC122878184/gene-si:dkey-183n20.15/gene-si:ch211-212k18.15	3	LOC122878184/si:ch211-212k18.15/si:dkey-183n20.15	3	gene-LOC122878184/gene-si:ch211-212k18.15/gene-si:dkey-183n20.15	0
MF	GO:0019887	protein kinase regulator activity	1/235	64/15230	0.631127057763871	0.847219474280849	gene-pkig	1	pkig	1	gene-pkig	0
MF	GO:0004620	phospholipase activity	1/235	65/15230	0.636842812836104	0.848610598681467	gene-smpdl3b	1	smpdl3b	0	-	1
MF	GO:0016779	nucleotidyltransferase activity	2/235	140/15230	0.639196982731491	0.848610598681467	gene-tent5bb/gene-SCRV_gp6	2	L/tent5bb	1	gene-SCRV_gp6	1
MF	GO:0038024	cargo receptor activity	1/235	66/15230	0.64247037228111	0.848610598681467	gene-si:ch211-136a13.1	1	si:ch211-136a13.1	0	-	1
MF	GO:0019787	ubiquitin-like protein transferase activity	3/235	218/15230	0.657208255273734	0.861020207874278	gene-LOC122878184/gene-si:dkey-183n20.15/gene-si:ch211-212k18.15	3	LOC122878184/si:ch211-212k18.15/si:dkey-183n20.15	3	gene-LOC122878184/gene-si:ch211-212k18.15/gene-si:dkey-183n20.15	0
MF	GO:0003713	transcription coactivator activity	1/235	69/15230	0.658837325053597	0.861020207874278	gene-wbp2	1	wbp2	1	gene-wbp2	0
MF	GO:0008170	N-methyltransferase activity	1/235	71/15230	0.669331946442914	0.863293170080062	gene-SCRV_gp6	1	L	1	gene-SCRV_gp6	0
MF	GO:0005262	calcium channel activity	1/235	72/15230	0.674458075645758	0.863293170080062	gene-trpm6	1	trpm6	0	-	1
MF	GO:0005267	potassium channel activity	2/235	154/15230	0.690243347414149	0.863293170080062	gene-kcnn3/gene-kcnk9	2	kcnk9/kcnn3	2	gene-kcnk9/gene-kcnn3	0
MF	GO:0016747	transferase activity, transferring acyl groups other than amino-acyl groups	2/235	154/15230	0.690243347414149	0.863293170080062	gene-soat1/gene-nat14	2	nat14/soat1	1	gene-soat1	1
MF	GO:1990939	ATP-dependent microtubule motor activity	1/235	76/15230	0.694183323767914	0.863293170080062	gene-kif26bb	1	kif26bb	1	gene-kif26bb	0
MF	GO:0003777	microtubule motor activity	1/235	77/15230	0.698925762656296	0.863293170080062	gene-kif26bb	1	kif26bb	1	gene-kif26bb	0
MF	GO:0016791	phosphatase activity	4/235	310/15230	0.708138205271265	0.863293170080062	gene-dusp5/gene-plpp3/gene-ppm1lb/gene-ptpro	4	dusp5/plpp3/ppm1lb/ptpro	1	gene-dusp5	3
MF	GO:0106306	protein serine phosphatase activity	1/235	79/15230	0.708192061458136	0.863293170080062	gene-dusp5	1	dusp5	1	gene-dusp5	0
MF	GO:0106307	protein threonine phosphatase activity	1/235	79/15230	0.708192061458136	0.863293170080062	gene-dusp5	1	dusp5	1	gene-dusp5	0
MF	GO:0016298	lipase activity	1/235	80/15230	0.712718156472151	0.863293170080062	gene-smpdl3b	1	smpdl3b	0	-	1
MF	GO:0016758	transferase activity, transferring hexosyl groups	2/235	162/15230	0.716662387766373	0.863293170080062	gene-LOC122876915/gene-LOC122863823	2	LOC122863823/LOC122876915	1	gene-LOC122876915	1
MF	GO:1901681	sulfur compound binding	1/235	81/15230	0.717174343483969	0.863293170080062	gene-ndnf	1	ndnf	0	-	1
MF	GO:0005516	calmodulin binding	1/235	83/15230	0.725881277928349	0.863293170080062	gene-kcnn3	1	kcnn3	1	gene-kcnn3	0
MF	GO:0015078	proton transmembrane transporter activity	1/235	84/15230	0.730134126656601	0.863293170080062	gene-atp6v1c1b	1	atp6v1c1b	1	gene-atp6v1c1b	0
MF	GO:0015276	ligand-gated ion channel activity	2/235	167/15230	0.732198512552356	0.863293170080062	gene-chrna3/gene-LOC122883451	2	chrna3/LOC122883451	0	-	2
MF	GO:0022834	ligand-gated channel activity	2/235	167/15230	0.732198512552356	0.863293170080062	gene-chrna3/gene-LOC122883451	2	chrna3/LOC122883451	0	-	2
MF	GO:0000978	RNA polymerase II cis-regulatory region sequence-specific DNA binding	2/235	169/15230	0.738208301751906	0.863293170080062	gene-LOC122877917/gene-snai2	2	LOC122877917/snai2	1	gene-LOC122877917	1
MF	GO:0015079	potassium ion transmembrane transporter activity	2/235	172/15230	0.747007876893698	0.863293170080062	gene-kcnn3/gene-kcnk9	2	kcnk9/kcnn3	2	gene-kcnk9/gene-kcnn3	0
MF	GO:0016829	lyase activity	2/235	172/15230	0.747007876893698	0.863293170080062	gene-npr2/gene-enosf1	2	enosf1/npr2	1	gene-enosf1	1
MF	GO:0061630	ubiquitin protein ligase activity	1/235	89/15230	0.750432782636494	0.863293170080062	gene-si:dkey-183n20.15	1	si:dkey-183n20.15	1	gene-si:dkey-183n20.15	0
MF	GO:0061659	ubiquitin-like protein ligase activity	1/235	90/15230	0.754306258369961	0.863293170080062	gene-si:dkey-183n20.15	1	si:dkey-183n20.15	1	gene-si:dkey-183n20.15	0
MF	GO:0000987	cis-regulatory region sequence-specific DNA binding	2/235	175/15230	0.755553457655842	0.863293170080062	gene-LOC122877917/gene-snai2	2	LOC122877917/snai2	1	gene-LOC122877917	1
MF	GO:0005543	phospholipid binding	2/235	175/15230	0.755553457655842	0.863293170080062	gene-LOC122888042/gene-phlda1	2	LOC122888042/phlda1	1	gene-LOC122888042	1
MF	GO:0008168	methyltransferase activity	3/235	258/15230	0.763859025938802	0.863293170080062	gene-LOC122876938/gene-SCRV_gp6/Novel.22	3	LOC122876938/L/Novel.22	3	gene-LOC122876938/gene-SCRV_gp6/Novel.22	0
MF	GO:0015267	channel activity	6/235	488/15230	0.768388880973886	0.863293170080062	gene-chrna3/gene-trpm6/gene-aqp3a/gene-kcnn3/gene-LOC122883451/gene-kcnk9	6	aqp3a/chrna3/kcnk9/kcnn3/LOC122883451/trpm6	3	gene-aqp3a/gene-kcnk9/gene-kcnn3	3
MF	GO:0022803	passive transmembrane transporter activity	6/235	488/15230	0.768388880973886	0.863293170080062	gene-chrna3/gene-trpm6/gene-aqp3a/gene-kcnn3/gene-LOC122883451/gene-kcnk9	6	aqp3a/chrna3/kcnk9/kcnn3/LOC122883451/trpm6	3	gene-aqp3a/gene-kcnk9/gene-kcnn3	3
MF	GO:0008234	cysteine-type peptidase activity	1/235	95/15230	0.772793842689923	0.863293170080062	gene-scrn2	1	scrn2	1	gene-scrn2	0
MF	GO:0005525	GTP binding	6/235	491/15230	0.773405387909172	0.863293170080062	gene-LOC122874274/gene-rab3ab/gene-rab11al/gene-arl5c/gene-LOC122868820/gene-rerg	6	arl5c/LOC122868820/LOC122874274/rab11al/rab3ab/rerg	3	gene-arl5c/gene-LOC122874274/gene-rab11al	3
MF	GO:0032550	purine ribonucleoside binding	6/235	491/15230	0.773405387909172	0.863293170080062	gene-LOC122874274/gene-rab3ab/gene-rab11al/gene-arl5c/gene-LOC122868820/gene-rerg	6	arl5c/LOC122868820/LOC122874274/rab11al/rab3ab/rerg	3	gene-arl5c/gene-LOC122874274/gene-rab11al	3
MF	GO:0001883	purine nucleoside binding	6/235	492/15230	0.775059549679403	0.863293170080062	gene-LOC122874274/gene-rab3ab/gene-rab11al/gene-arl5c/gene-LOC122868820/gene-rerg	6	arl5c/LOC122868820/LOC122874274/rab11al/rab3ab/rerg	3	gene-arl5c/gene-LOC122874274/gene-rab11al	3
MF	GO:0015085	calcium ion transmembrane transporter activity	1/235	96/15230	0.776321655505772	0.863293170080062	gene-trpm6	1	trpm6	0	-	1
MF	GO:0016616	oxidoreductase activity, acting on the CH-OH group of donors, NAD or NADP as acceptor	1/235	97/15230	0.779794921724627	0.863293170080062	gene-LOC122871599	1	LOC122871599	1	gene-LOC122871599	0
MF	GO:0032549	ribonucleoside binding	6/235	495/15230	0.779968188208762	0.863293170080062	gene-LOC122874274/gene-rab3ab/gene-rab11al/gene-arl5c/gene-LOC122868820/gene-rerg	6	arl5c/LOC122868820/LOC122874274/rab11al/rab3ab/rerg	3	gene-arl5c/gene-LOC122874274/gene-rab11al	3
MF	GO:0001882	nucleoside binding	6/235	496/15230	0.781586496838675	0.863293170080062	gene-LOC122874274/gene-rab3ab/gene-rab11al/gene-arl5c/gene-LOC122868820/gene-rerg	6	arl5c/LOC122868820/LOC122874274/rab11al/rab3ab/rerg	3	gene-arl5c/gene-LOC122874274/gene-rab11al	3
MF	GO:0022890	inorganic cation transmembrane transporter activity	6/235	497/15230	0.783195876846417	0.863293170080062	gene-chrna3/gene-trpm6/gene-kcnn3/gene-LOC122883451/gene-atp6v1c1b/gene-kcnk9	6	atp6v1c1b/chrna3/kcnk9/kcnn3/LOC122883451/trpm6	3	gene-atp6v1c1b/gene-kcnk9/gene-kcnn3	3
MF	GO:0016741	transferase activity, transferring one-carbon groups	3/235	269/15230	0.788005626952952	0.863293170080062	gene-LOC122876938/gene-SCRV_gp6/Novel.22	3	LOC122876938/L/Novel.22	3	gene-LOC122876938/gene-SCRV_gp6/Novel.22	0
MF	GO:0045182	translation regulator activity	1/235	100/15230	0.789895775053012	0.863293170080062	gene-cpeb1b	1	cpeb1b	1	gene-cpeb1b	0
MF	GO:0016614	oxidoreductase activity, acting on CH-OH group of donors	1/235	102/15230	0.796372001836689	0.866163113121361	gene-LOC122871599	1	LOC122871599	1	gene-LOC122871599	0
MF	GO:0000287	magnesium ion binding	1/235	103/15230	0.799535181342795	0.866163113121361	gene-LOC122871826	1	LOC122871826	0	-	1
MF	GO:0008757	S-adenosylmethionine-dependent methyltransferase activity	1/235	106/15230	0.808734135348947	0.87230275734144	gene-SCRV_gp6	1	L	1	gene-SCRV_gp6	0
MF	GO:0051213	dioxygenase activity	1/235	108/15230	0.814632011482487	0.874843942765976	Novel.22	1	Novel.22	1	Novel.22	0
MF	GO:0016887	ATPase activity	5/235	444/15230	0.819189861591253	0.875930284904933	gene-LOC122882934/gene-hspa1b/gene-kif26bb/gene-LOC122869030/Novel.132	5	hspa1b/kif26bb/LOC122869030/LOC122882934/Novel.132	2	gene-kif26bb/gene-LOC122882934	3
MF	GO:0005216	ion channel activity	5/235	449/15230	0.826573949197684	0.88001623039581	gene-chrna3/gene-trpm6/gene-kcnn3/gene-LOC122883451/gene-kcnk9	5	chrna3/kcnk9/kcnn3/LOC122883451/trpm6	2	gene-kcnk9/gene-kcnn3	3
MF	GO:0016757	transferase activity, transferring glycosyl groups	3/235	305/15230	0.853130532371979	0.904391594402913	gene-xylt1/gene-LOC122876915/gene-LOC122863823	3	LOC122863823/LOC122876915/xylt1	1	gene-LOC122876915	2
MF	GO:0004386	helicase activity	1/235	129/15230	0.866618224551609	0.914763681471142	gene-LOC122882934	1	LOC122882934	1	gene-LOC122882934	0
MF	GO:0016853	isomerase activity	1/235	134/15230	0.876679847989703	0.921446478525348	gene-LOC122863375	1	LOC122863375	1	gene-LOC122863375	0
MF	GO:0140097	catalytic activity, acting on DNA	1/235	137/15230	0.882350217799888	0.923476711002425	gene-LOC122871826	1	LOC122871826	0	-	1
MF	GO:0004518	nuclease activity	1/235	144/15230	0.894591643683804	0.932338126539661	gene-LOC122871826	1	LOC122871826	0	-	1
MF	GO:0046873	metal ion transmembrane transporter activity	3/235	344/15230	0.903380829509567	0.937542289449005	gene-trpm6/gene-kcnn3/gene-kcnk9	3	kcnk9/kcnn3/trpm6	2	gene-kcnk9/gene-kcnn3	1
MF	GO:0016705	oxidoreductase activity, acting on paired donors, with incorporation or reduction of molecular oxygen	1/235	155/15230	0.911315541862552	0.941116207413673	Novel.22	1	Novel.22	1	Novel.22	0
MF	GO:0019899	enzyme binding	3/235	355/15230	0.914444897891828	0.941116207413673	gene-dok7b/gene-LOC122877917/gene-cnksr1	3	cnksr1/dok7b/LOC122877917	1	gene-LOC122877917	2
MF	GO:0022836	gated channel activity	3/235	375/15230	0.931662688652769	0.944645793650615	gene-chrna3/gene-kcnn3/gene-LOC122883451	3	chrna3/kcnn3/LOC122883451	1	gene-kcnn3	2
MF	GO:0004857	enzyme inhibitor activity	1/235	172/15230	0.932112894922022	0.944645793650615	gene-pkig	1	pkig	1	gene-pkig	0
MF	GO:0008236	serine-type peptidase activity	1/235	173/15230	0.933172362958502	0.944645793650615	gene-LOC122871759	1	LOC122871759	1	gene-LOC122871759	0
MF	GO:0017171	serine hydrolase activity	1/235	173/15230	0.933172362958502	0.944645793650615	gene-LOC122871759	1	LOC122871759	1	gene-LOC122871759	0
MF	GO:0015291	secondary active transmembrane transporter activity	1/235	185/15230	0.944671842251857	0.952383449127383	gene-slc47a3	1	slc47a3	1	gene-slc47a3	0
MF	GO:0022804	active transmembrane transporter activity	1/235	243/15230	0.977836753801436	0.981811699955101	gene-slc47a3	1	slc47a3	1	gene-slc47a3	0
MF	GO:0140098	catalytic activity, acting on RNA	1/235	279/15230	0.987461512376703	0.987461512376703	gene-SCRV_gp6	1	L	1	gene-SCRV_gp6	0
