# Supplementary material for: Siniperca chuatsi Rhabdovirus (SCRV)-Induced Key Pathways and Major Antiviral Genes in Fish Cells
Source: Microorganisms. 2022 Dec 13;10(12):2464. doi: 10.3390/microorganisms10122464 (PMC9788611; doi:10.3390/microorganisms10122464)
Supplement: Supplementary file 1 [file microorganisms-10-02464-s001.zip › Table S4. S0_vs_S24.GO.enrichment.xls]

ONTOLOGY	ID	Description	GeneRatio	BgRatio	pvalue	p.adjust	geneID	Count	GeneName	Up_count	Up_geneID	Down_count
BP	GO:0071495	cellular response to endogenous stimulus	22/430	207/11595	8.61653932529777e-06	0.00765419944177797	gene-smad3a/gene-LOC122863684/gene-fgf7/gene-LOC122864683/gene-smad6b/gene-ndnf/gene-LOC122877917/gene-pid1/gene-LOC122880049/gene-LOC122881519/gene-snai2/gene-smad9/gene-LOC122888753/gene-id2a/gene-tnca/gene-LOC122865952/gene-smad7/gene-bambia/gene-nog2/gene-wbp2/gene-si:ch73-335l21.1/gene-LOC122871826	22	bambia/fgf7/id2a/LOC122863684/LOC122864683/LOC122865952/LOC122871826/LOC122877917/LOC122880049/LOC122881519/LOC122888753/ndnf/nog2/pid1/si:ch73-335l21.1/smad3a/smad6b/smad7/smad9/snai2/tnca/wbp2	6	gene-LOC122864683/gene-LOC122877917/gene-LOC122880049/gene-LOC122881519/gene-LOC122888753/gene-wbp2	16
BP	GO:0016477	cell migration	25/430	261/11595	1.33468821259112e-05	0.00765419944177797	gene-cebpa/gene-swap70a/gene-LOC122875528/gene-snai1a/gene-lamb3/gene-LOC122873669/gene-LOC122873767/gene-carmil2/gene-reln/gene-nsmfb/gene-plat/gene-ndnf/gene-amotl2a/gene-podn/gene-LOC122877917/gene-apln/gene-LOC122881975/gene-LOC122881976/gene-osgin2/gene-mmp9/gene-snai2/gene-si:ch211-278a6.1/gene-mrtfbb/gene-LOC122871413/gene-tafa5a	25	amotl2a/apln/carmil2/cebpa/lamb3/LOC122871413/LOC122873669/LOC122873767/LOC122875528/LOC122877917/LOC122881975/LOC122881976/mmp9/mrtfbb/ndnf/nsmfb/osgin2/plat/podn/reln/si:ch211-278a6.1/snai1a/snai2/swap70a/tafa5a	16	gene-apln/gene-carmil2/gene-cebpa/gene-lamb3/gene-LOC122871413/gene-LOC122873767/gene-LOC122875528/gene-LOC122877917/gene-LOC122881975/gene-LOC122881976/gene-mmp9/gene-nsmfb/gene-osgin2/gene-plat/gene-podn/gene-si:ch211-278a6.1	9
BP	GO:0009719	response to endogenous stimulus	23/430	233/11595	1.82255179261748e-05	0.00765419944177797	gene-smad3a/gene-LOC122863684/gene-fgf7/gene-LOC122864683/gene-smad6b/gene-ndnf/gene-LOC122877917/gene-pid1/gene-LOC122880049/gene-LOC122881519/gene-snai2/gene-smad9/gene-LOC122888753/gene-id2a/gene-paqr8/gene-tnca/gene-LOC122865952/gene-smad7/gene-bambia/gene-nog2/gene-wbp2/gene-si:ch73-335l21.1/gene-LOC122871826	23	bambia/fgf7/id2a/LOC122863684/LOC122864683/LOC122865952/LOC122871826/LOC122877917/LOC122880049/LOC122881519/LOC122888753/ndnf/nog2/paqr8/pid1/si:ch73-335l21.1/smad3a/smad6b/smad7/smad9/snai2/tnca/wbp2	7	gene-LOC122864683/gene-LOC122877917/gene-LOC122880049/gene-LOC122881519/gene-LOC122888753/gene-paqr8/gene-wbp2	16
BP	GO:0070848	response to growth factor	17/430	143/11595	2.14854721172715e-05	0.00765419944177797	gene-smad3a/gene-LOC122863684/gene-fgf7/gene-smad6b/gene-ndnf/gene-LOC122877917/gene-LOC122880049/gene-LOC122881519/gene-snai2/gene-smad9/gene-LOC122888753/gene-id2a/gene-tnca/gene-smad7/gene-bambia/gene-nog2/gene-LOC122871826	17	bambia/fgf7/id2a/LOC122863684/LOC122871826/LOC122877917/LOC122880049/LOC122881519/LOC122888753/ndnf/nog2/smad3a/smad6b/smad7/smad9/snai2/tnca	4	gene-LOC122877917/gene-LOC122880049/gene-LOC122881519/gene-LOC122888753	13
BP	GO:0071310	cellular response to organic substance	28/430	330/11595	3.86724117236212e-05	0.00798834179054652	gene-smad3a/gene-LOC122863684/gene-fgf7/gene-LOC122864683/gene-cxcl12b/gene-smad6b/gene-LOC122878212/gene-ndnf/gene-LOC122877917/gene-pid1/gene-LOC122880049/gene-csf1ra/gene-LOC122881519/gene-snai2/gene-smad9/gene-LOC122888753/gene-id2a/gene-cmpk2/gene-tnca/gene-LOC122865952/gene-smad7/gene-bambia/gene-nog2/gene-wbp2/gene-LOC122868820/gene-si:ch73-335l21.1/gene-LOC122870595/gene-LOC122871826	28	bambia/cmpk2/csf1ra/cxcl12b/fgf7/id2a/LOC122863684/LOC122864683/LOC122865952/LOC122868820/LOC122870595/LOC122871826/LOC122877917/LOC122878212/LOC122880049/LOC122881519/LOC122888753/ndnf/nog2/pid1/si:ch73-335l21.1/smad3a/smad6b/smad7/smad9/snai2/tnca/wbp2	9	gene-cmpk2/gene-csf1ra/gene-LOC122864683/gene-LOC122877917/gene-LOC122878212/gene-LOC122880049/gene-LOC122881519/gene-LOC122888753/gene-wbp2	19
BP	GO:0001944	vasculature development	22/430	230/11595	4.48615337896137e-05	0.00798834179054652	gene-padi2/gene-LOC122870658/gene-LOC122877908/gene-amotl2a/gene-nlgn1/gene-LOC122877917/gene-apln/gene-kdrl/gene-LOC122881975/gene-LOC122881976/gene-vegfaa/gene-angptl4/gene-LOC122887564/gene-ftr82/gene-LOC122888753/gene-angpt2b/gene-LOC122869378/gene-mrtfbb/gene-hspa12b/gene-pthlha/gene-tafa5a/gene-rcan1b	22	amotl2a/angpt2b/angptl4/apln/ftr82/hspa12b/kdrl/LOC122869378/LOC122870658/LOC122877908/LOC122877917/LOC122881975/LOC122881976/LOC122887564/LOC122888753/mrtfbb/nlgn1/padi2/pthlha/rcan1b/tafa5a/vegfaa	13	gene-apln/gene-hspa12b/gene-LOC122869378/gene-LOC122870658/gene-LOC122877908/gene-LOC122877917/gene-LOC122881975/gene-LOC122881976/gene-LOC122888753/gene-nlgn1/gene-padi2/gene-rcan1b/gene-vegfaa	9
BP	GO:0070887	cellular response to chemical stimulus	32/430	410/11595	5.65653254766322e-05	0.00798834179054652	gene-smad3a/gene-LOC122863684/gene-fgf7/gene-swap70a/gene-LOC122864683/gene-LOC122873767/gene-cxcl12b/gene-smad6b/gene-LOC122878212/gene-ndnf/gene-LOC122877917/gene-pid1/gene-LOC122880049/gene-csf1ra/gene-LOC122881519/gene-snai2/gene-smad9/gene-LOC122888753/gene-id2a/gene-cmpk2/gene-tnca/gene-LOC122865952/gene-smad7/gene-bambia/gene-nog2/gene-wbp2/gene-LOC122868820/gene-cbx8a/gene-nfe2l1a/gene-si…	32	bambia/cbx8a/cmpk2/csf1ra/cxcl12b/fgf7/id2a/LOC122863684/LOC122864683/LOC122865952/LOC122868820/LOC122870595/LOC122871826/LOC122873767/LOC122877917/LOC122878212/LOC122880049/LOC122881519/LOC122888753/ndnf/nfe2l1a/nog2/pid1/si:ch73-335l21.1/smad3a/smad6b/smad7/smad9/snai2/swap70a/tnca/wbp2	11	gene-cmpk2/gene-csf1ra/gene-LOC122864683/gene-LOC122873767/gene-LOC122877917/gene-LOC122878212/gene-LOC122880049/gene-LOC122881519/gene-LOC122888753/gene-nfe2l1a/gene-wbp2	21
BP	GO:0007179	transforming growth factor beta receptor signaling pathway	8/430	38/11595	6.15260535443585e-05	0.00798834179054652	gene-smad3a/gene-LOC122863684/gene-smad6b/gene-LOC122881519/gene-smad9/gene-smad7/gene-bambia/gene-LOC122871826	8	bambia/LOC122863684/LOC122871826/LOC122881519/smad3a/smad6b/smad7/smad9	1	gene-LOC122881519	7
BP	GO:0071559	response to transforming growth factor beta	8/430	38/11595	6.15260535443585e-05	0.00798834179054652	gene-smad3a/gene-LOC122863684/gene-smad6b/gene-LOC122881519/gene-smad9/gene-smad7/gene-bambia/gene-LOC122871826	8	bambia/LOC122863684/LOC122871826/LOC122881519/smad3a/smad6b/smad7/smad9	1	gene-LOC122881519	7
BP	GO:0071560	cellular response to transforming growth factor beta stimulus	8/430	38/11595	6.15260535443585e-05	0.00798834179054652	gene-smad3a/gene-LOC122863684/gene-smad6b/gene-LOC122881519/gene-smad9/gene-smad7/gene-bambia/gene-LOC122871826	8	bambia/LOC122863684/LOC122871826/LOC122881519/smad3a/smad6b/smad7/smad9	1	gene-LOC122881519	7
BP	GO:0072359	circulatory system development	30/430	375/11595	6.1664392769131e-05	0.00798834179054652	gene-padi2/gene-skib/gene-LOC122870658/gene-lrrc39/gene-LOC122877908/gene-amotl2a/gene-nlgn1/gene-LOC122877917/gene-apln/gene-kdrl/gene-cadm4/gene-LOC122881975/gene-LOC122881976/gene-vegfaa/gene-snai2/gene-angptl4/gene-LOC122887564/gene-ftr82/gene-LOC122888753/gene-pard6gb/gene-angpt2b/gene-pdzph1/gene-si:ch211-198m17.1/gene-LOC122869378/gene-mrtfbb/gene-hspa12b/gene-pthlha/gene-tafa5a/gene-xirp2…	30	amotl2a/angpt2b/angptl4/apln/cadm4/ftr82/hspa12b/kdrl/LOC122869378/LOC122870658/LOC122877908/LOC122877917/LOC122881975/LOC122881976/LOC122887564/LOC122888753/lrrc39/mrtfbb/nlgn1/padi2/pard6gb/pdzph1/pthlha/rcan1b/si:ch211-198m17.1/skib/snai2/tafa5a/vegfaa/xirp2a	17	gene-apln/gene-cadm4/gene-hspa12b/gene-LOC122869378/gene-LOC122870658/gene-LOC122877908/gene-LOC122877917/gene-LOC122881975/gene-LOC122881976/gene-LOC122888753/gene-lrrc39/gene-nlgn1/gene-padi2/gene-pdzph1/gene-rcan1b/gene-vegfaa/gene-xirp2a	13
BP	GO:0071363	cellular response to growth factor stimulus	16/430	142/11595	7.21207925646147e-05	0.008564344117048	gene-smad3a/gene-LOC122863684/gene-fgf7/gene-smad6b/gene-ndnf/gene-LOC122877917/gene-LOC122880049/gene-LOC122881519/gene-snai2/gene-smad9/gene-LOC122888753/gene-id2a/gene-smad7/gene-bambia/gene-nog2/gene-LOC122871826	16	bambia/fgf7/id2a/LOC122863684/LOC122871826/LOC122877917/LOC122880049/LOC122881519/LOC122888753/ndnf/nog2/smad3a/smad6b/smad7/smad9/snai2	4	gene-LOC122877917/gene-LOC122880049/gene-LOC122881519/gene-LOC122888753	12
BP	GO:0001568	blood vessel development	20/430	209/11595	9.84144241472135e-05	0.0107809907554481	gene-LOC122870658/gene-LOC122877908/gene-amotl2a/gene-nlgn1/gene-LOC122877917/gene-apln/gene-kdrl/gene-LOC122881975/gene-LOC122881976/gene-vegfaa/gene-angptl4/gene-LOC122887564/gene-LOC122888753/gene-angpt2b/gene-LOC122869378/gene-mrtfbb/gene-hspa12b/gene-pthlha/gene-tafa5a/gene-rcan1b	20	amotl2a/angpt2b/angptl4/apln/hspa12b/kdrl/LOC122869378/LOC122870658/LOC122877908/LOC122877917/LOC122881975/LOC122881976/LOC122887564/LOC122888753/mrtfbb/nlgn1/pthlha/rcan1b/tafa5a/vegfaa	12	gene-apln/gene-hspa12b/gene-LOC122869378/gene-LOC122870658/gene-LOC122877908/gene-LOC122877917/gene-LOC122881975/gene-LOC122881976/gene-LOC122888753/gene-nlgn1/gene-rcan1b/gene-vegfaa	8
BP	GO:0001525	angiogenesis	17/430	162/11595	0.00010591850566756	0.0107809907554481	gene-LOC122870658/gene-LOC122877908/gene-amotl2a/gene-nlgn1/gene-LOC122877917/gene-apln/gene-kdrl/gene-LOC122881975/gene-LOC122881976/gene-vegfaa/gene-angptl4/gene-LOC122887564/gene-LOC122888753/gene-LOC122869378/gene-hspa12b/gene-tafa5a/gene-rcan1b	17	amotl2a/angptl4/apln/hspa12b/kdrl/LOC122869378/LOC122870658/LOC122877908/LOC122877917/LOC122881975/LOC122881976/LOC122887564/LOC122888753/nlgn1/rcan1b/tafa5a/vegfaa	12	gene-apln/gene-hspa12b/gene-LOC122869378/gene-LOC122870658/gene-LOC122877908/gene-LOC122877917/gene-LOC122881975/gene-LOC122881976/gene-LOC122888753/gene-nlgn1/gene-rcan1b/gene-vegfaa	5
BP	GO:0048870	cell motility	25/430	304/11595	0.000164357900940424	0.0146381255525065	gene-cebpa/gene-swap70a/gene-LOC122875528/gene-snai1a/gene-lamb3/gene-LOC122873669/gene-LOC122873767/gene-carmil2/gene-reln/gene-nsmfb/gene-plat/gene-ndnf/gene-amotl2a/gene-podn/gene-LOC122877917/gene-apln/gene-LOC122881975/gene-LOC122881976/gene-osgin2/gene-mmp9/gene-snai2/gene-si:ch211-278a6.1/gene-mrtfbb/gene-LOC122871413/gene-tafa5a	25	amotl2a/apln/carmil2/cebpa/lamb3/LOC122871413/LOC122873669/LOC122873767/LOC122875528/LOC122877917/LOC122881975/LOC122881976/mmp9/mrtfbb/ndnf/nsmfb/osgin2/plat/podn/reln/si:ch211-278a6.1/snai1a/snai2/swap70a/tafa5a	16	gene-apln/gene-carmil2/gene-cebpa/gene-lamb3/gene-LOC122871413/gene-LOC122873767/gene-LOC122875528/gene-LOC122877917/gene-LOC122881975/gene-LOC122881976/gene-mmp9/gene-nsmfb/gene-osgin2/gene-plat/gene-podn/gene-si:ch211-278a6.1	9
BP	GO:0051674	localization of cell	25/430	304/11595	0.000164357900940424	0.0146381255525065	gene-cebpa/gene-swap70a/gene-LOC122875528/gene-snai1a/gene-lamb3/gene-LOC122873669/gene-LOC122873767/gene-carmil2/gene-reln/gene-nsmfb/gene-plat/gene-ndnf/gene-amotl2a/gene-podn/gene-LOC122877917/gene-apln/gene-LOC122881975/gene-LOC122881976/gene-osgin2/gene-mmp9/gene-snai2/gene-si:ch211-278a6.1/gene-mrtfbb/gene-LOC122871413/gene-tafa5a	25	amotl2a/apln/carmil2/cebpa/lamb3/LOC122871413/LOC122873669/LOC122873767/LOC122875528/LOC122877917/LOC122881975/LOC122881976/mmp9/mrtfbb/ndnf/nsmfb/osgin2/plat/podn/reln/si:ch211-278a6.1/snai1a/snai2/swap70a/tafa5a	16	gene-apln/gene-carmil2/gene-cebpa/gene-lamb3/gene-LOC122871413/gene-LOC122873767/gene-LOC122875528/gene-LOC122877917/gene-LOC122881975/gene-LOC122881976/gene-mmp9/gene-nsmfb/gene-osgin2/gene-plat/gene-podn/gene-si:ch211-278a6.1	9
BP	GO:0048514	blood vessel morphogenesis	18/430	189/11595	0.00023073781184956	0.0193412577579778	gene-LOC122870658/gene-LOC122877908/gene-amotl2a/gene-nlgn1/gene-LOC122877917/gene-apln/gene-kdrl/gene-LOC122881975/gene-LOC122881976/gene-vegfaa/gene-angptl4/gene-LOC122887564/gene-LOC122888753/gene-LOC122869378/gene-mrtfbb/gene-hspa12b/gene-tafa5a/gene-rcan1b	18	amotl2a/angptl4/apln/hspa12b/kdrl/LOC122869378/LOC122870658/LOC122877908/LOC122877917/LOC122881975/LOC122881976/LOC122887564/LOC122888753/mrtfbb/nlgn1/rcan1b/tafa5a/vegfaa	12	gene-apln/gene-hspa12b/gene-LOC122869378/gene-LOC122870658/gene-LOC122877908/gene-LOC122877917/gene-LOC122881975/gene-LOC122881976/gene-LOC122888753/gene-nlgn1/gene-rcan1b/gene-vegfaa	6
BP	GO:0006955	immune response	28/430	368/11595	0.000251437722022515	0.0199054863267825	gene-swap70a/gene-pstpip1b/gene-LOC122873767/gene-cxcl12b/gene-nlrc5/gene-LOC122876711/gene-LOC122878212/gene-LOC122878108/gene-ccl44/gene-pglyrp5/gene-ptx3a/gene-vtna/gene-il15l/gene-LOC122880389/gene-LOC122881737/gene-LOC122884604/gene-ifih1/gene-LOC122888056/gene-irf1b/gene-rsad2/gene-LOC122868841/gene-dhx58/gene-LOC122869242/gene-LOC122870587/gene-LOC122870595/gene-LOC122869735/gene-LOC122869…	28	b2m/ccl44/cxcl12b/dhx58/ifih1/il15l/irf1b/LOC122868841/LOC122869242/LOC122869735/LOC122869738/LOC122870587/LOC122870595/LOC122873767/LOC122876711/LOC122878108/LOC122878212/LOC122880389/LOC122881737/LOC122884604/LOC122888056/nlrc5/pglyrp5/pstpip1b/ptx3a/rsad2/swap70a/vtna	21	gene-b2m/gene-dhx58/gene-ifih1/gene-irf1b/gene-LOC122868841/gene-LOC122869242/gene-LOC122869735/gene-LOC122869738/gene-LOC122870587/gene-LOC122873767/gene-LOC122876711/gene-LOC122878108/gene-LOC122878212/gene-LOC122880389/gene-LOC122884604/gene-LOC122888056/gene-nlrc5/gene-pstpip1b/gene-ptx3a/gene-rsad2/gene-vtna	7
BP	GO:0009607	response to biotic stimulus	22/430	267/11595	0.000390784443195285	0.0293088332396464	gene-pstpip1b/gene-nlrc5/gene-LOC122878212/gene-LOC122878108/gene-LOC122877917/gene-pglyrp5/gene-ptx3a/gene-LOC122881737/gene-LOC122881776/gene-LOC122881039/gene-wdfy4/gene-ifih1/gene-rsad2/gene-cmpk2/gene-nfkbiaa/gene-ch25h/gene-LOC122868841/gene-dhx58/gene-LOC122868820/gene-LOC122869242/gene-LOC122870587/gene-LOC122870595	22	ch25h/cmpk2/dhx58/ifih1/LOC122868820/LOC122868841/LOC122869242/LOC122870587/LOC122870595/LOC122877917/LOC122878108/LOC122878212/LOC122881039/LOC122881737/LOC122881776/nfkbiaa/nlrc5/pglyrp5/pstpip1b/ptx3a/rsad2/wdfy4	17	gene-ch25h/gene-cmpk2/gene-dhx58/gene-ifih1/gene-LOC122868841/gene-LOC122869242/gene-LOC122870587/gene-LOC122877917/gene-LOC122878108/gene-LOC122878212/gene-LOC122881776/gene-nfkbiaa/gene-nlrc5/gene-pstpip1b/gene-ptx3a/gene-rsad2/gene-wdfy4	5
BP	GO:0071396	cellular response to lipid	7/430	38/11595	0.000427640959777739	0.0304694183841639	gene-LOC122877917/gene-snai2/gene-cmpk2/gene-tnca/gene-LOC122865952/gene-LOC122868820/gene-LOC122870595	7	cmpk2/LOC122865952/LOC122868820/LOC122870595/LOC122877917/snai2/tnca	2	gene-cmpk2/gene-LOC122877917	5
BP	GO:0043207	response to external biotic stimulus	21/430	258/11595	0.000618654540228675	0.0400719418102664	gene-pstpip1b/gene-nlrc5/gene-LOC122878212/gene-LOC122878108/gene-pglyrp5/gene-ptx3a/gene-LOC122881737/gene-LOC122881776/gene-LOC122881039/gene-wdfy4/gene-ifih1/gene-rsad2/gene-cmpk2/gene-nfkbiaa/gene-ch25h/gene-LOC122868841/gene-dhx58/gene-LOC122868820/gene-LOC122869242/gene-LOC122870587/gene-LOC122870595	21	ch25h/cmpk2/dhx58/ifih1/LOC122868820/LOC122868841/LOC122869242/LOC122870587/LOC122870595/LOC122878108/LOC122878212/LOC122881039/LOC122881737/LOC122881776/nfkbiaa/nlrc5/pglyrp5/pstpip1b/ptx3a/rsad2/wdfy4	16	gene-ch25h/gene-cmpk2/gene-dhx58/gene-ifih1/gene-LOC122868841/gene-LOC122869242/gene-LOC122870587/gene-LOC122878108/gene-LOC122878212/gene-LOC122881776/gene-nfkbiaa/gene-nlrc5/gene-pstpip1b/gene-ptx3a/gene-rsad2/gene-wdfy4	5
BP	GO:0051707	response to other organism	21/430	258/11595	0.000618654540228675	0.0400719418102664	gene-pstpip1b/gene-nlrc5/gene-LOC122878212/gene-LOC122878108/gene-pglyrp5/gene-ptx3a/gene-LOC122881737/gene-LOC122881776/gene-LOC122881039/gene-wdfy4/gene-ifih1/gene-rsad2/gene-cmpk2/gene-nfkbiaa/gene-ch25h/gene-LOC122868841/gene-dhx58/gene-LOC122868820/gene-LOC122869242/gene-LOC122870587/gene-LOC122870595	21	ch25h/cmpk2/dhx58/ifih1/LOC122868820/LOC122868841/LOC122869242/LOC122870587/LOC122870595/LOC122878108/LOC122878212/LOC122881039/LOC122881737/LOC122881776/nfkbiaa/nlrc5/pglyrp5/pstpip1b/ptx3a/rsad2/wdfy4	16	gene-ch25h/gene-cmpk2/gene-dhx58/gene-ifih1/gene-LOC122868841/gene-LOC122869242/gene-LOC122870587/gene-LOC122878108/gene-LOC122878212/gene-LOC122881776/gene-nfkbiaa/gene-nlrc5/gene-pstpip1b/gene-ptx3a/gene-rsad2/gene-wdfy4	5
BP	GO:0048646	anatomical structure formation involved in morphogenesis	25/430	335/11595	0.000709300426653543	0.0426950408628458	gene-LOC122870658/gene-lrrc39/gene-LOC122877908/gene-amotl2a/gene-nlgn1/gene-LOC122877917/gene-apln/gene-kdrl/gene-cadm4/gene-LOC122881975/gene-LOC122881976/gene-vegfaa/gene-myofl/gene-snai2/gene-angptl4/gene-LOC122887564/gene-LOC122888753/gene-pard6gb/gene-LOC122869123/gene-LOC122869378/gene-hspa12b/gene-LOC122870587/gene-tafa5a/gene-rpgrb/gene-rcan1b	25	amotl2a/angptl4/apln/cadm4/hspa12b/kdrl/LOC122869123/LOC122869378/LOC122870587/LOC122870658/LOC122877908/LOC122877917/LOC122881975/LOC122881976/LOC122887564/LOC122888753/lrrc39/myofl/nlgn1/pard6gb/rcan1b/rpgrb/snai2/tafa5a/vegfaa	16	gene-apln/gene-cadm4/gene-hspa12b/gene-LOC122869123/gene-LOC122869378/gene-LOC122870587/gene-LOC122870658/gene-LOC122877908/gene-LOC122877917/gene-LOC122881975/gene-LOC122881976/gene-LOC122888753/gene-lrrc39/gene-nlgn1/gene-rcan1b/gene-vegfaa	9
BP	GO:0035239	tube morphogenesis	21/430	261/11595	0.000719074372426876	0.0426950408628458	gene-skib/gene-LOC122870658/gene-LOC122877908/gene-amotl2a/gene-nlgn1/gene-LOC122877917/gene-apln/gene-kdrl/gene-LOC122881975/gene-LOC122881976/gene-vegfaa/gene-angptl4/gene-LOC122887564/gene-LOC122888753/gene-pard6gb/gene-tnca/gene-LOC122869378/gene-mrtfbb/gene-hspa12b/gene-tafa5a/gene-rcan1b	21	amotl2a/angptl4/apln/hspa12b/kdrl/LOC122869378/LOC122870658/LOC122877908/LOC122877917/LOC122881975/LOC122881976/LOC122887564/LOC122888753/mrtfbb/nlgn1/pard6gb/rcan1b/skib/tafa5a/tnca/vegfaa	12	gene-apln/gene-hspa12b/gene-LOC122869378/gene-LOC122870658/gene-LOC122877908/gene-LOC122877917/gene-LOC122881975/gene-LOC122881976/gene-LOC122888753/gene-nlgn1/gene-rcan1b/gene-vegfaa	9
BP	GO:0007178	transmembrane receptor protein serine/threonine kinase signaling pathway	10/430	81/11595	0.000789196833720669	0.0449842195220781	gene-smad3a/gene-LOC122863684/gene-smad6b/gene-LOC122881519/gene-smad9/gene-id2a/gene-smad7/gene-bambia/gene-nog2/gene-LOC122871826	10	bambia/id2a/LOC122863684/LOC122871826/LOC122881519/nog2/smad3a/smad6b/smad7/smad9	1	gene-LOC122881519	9
BP	GO:0009615	response to virus	7/430	43/11595	0.000930866828589069	0.051018662720747	gene-LOC122878212/gene-wdfy4/gene-ifih1/gene-rsad2/gene-nfkbiaa/gene-ch25h/gene-dhx58	7	ch25h/dhx58/ifih1/LOC122878212/nfkbiaa/rsad2/wdfy4	7	gene-ch25h/gene-dhx58/gene-ifih1/gene-LOC122878212/gene-nfkbiaa/gene-rsad2/gene-wdfy4	0
BP	GO:0007043	cell-cell junction assembly	4/430	13/11595	0.0010213454846071	0.0539043450209302	gene-LOC122872091/gene-snai2/gene-si:ch211-198m17.1/gene-LOC122869537	4	LOC122869537/LOC122872091/si:ch211-198m17.1/snai2	1	gene-LOC122869537	3
BP	GO:0006952	defense response	23/430	311/11595	0.00129316567251004	0.0658128958331004	gene-pstpip1b/gene-LOC122873767/gene-cxcl12b/gene-nlrc5/gene-LOC122876711/gene-LOC122878212/gene-LOC122877917/gene-pglyrp5/gene-ptx3a/gene-csf1ra/gene-LOC122881737/gene-LOC122881776/gene-LOC122881975/gene-LOC122881976/gene-LOC122881039/gene-LOC122884604/gene-ifih1/gene-rsad2/gene-ch25h/gene-LOC122868841/gene-dhx58/gene-LOC122869242/gene-LOC122870595	23	ch25h/csf1ra/cxcl12b/dhx58/ifih1/LOC122868841/LOC122869242/LOC122870595/LOC122873767/LOC122876711/LOC122877917/LOC122878212/LOC122881039/LOC122881737/LOC122881776/LOC122881975/LOC122881976/LOC122884604/nlrc5/pglyrp5/pstpip1b/ptx3a/rsad2	18	gene-ch25h/gene-csf1ra/gene-dhx58/gene-ifih1/gene-LOC122868841/gene-LOC122869242/gene-LOC122873767/gene-LOC122876711/gene-LOC122877917/gene-LOC122878212/gene-LOC122881776/gene-LOC122881975/gene-LOC122881976/gene-LOC122884604/gene-nlrc5/gene-pstpip1b/gene-ptx3a/gene-rsad2	5
BP	GO:0040011	locomotion	28/430	410/11595	0.00137115890888166	0.0673759119019438	gene-cebpa/gene-swap70a/gene-LOC122875528/gene-snai1a/gene-lamb3/gene-LOC122873669/gene-LOC122873767/gene-carmil2/gene-reln/gene-nsmfb/gene-plat/gene-ndnf/gene-amotl2a/gene-podn/gene-LOC122877917/gene-apln/gene-myot/gene-LOC122881975/gene-LOC122881976/gene-osgin2/gene-mmp9/gene-LOC122885641/gene-snai2/gene-LOC122888546/gene-si:ch211-278a6.1/gene-mrtfbb/gene-LOC122871413/gene-tafa5a	28	amotl2a/apln/carmil2/cebpa/lamb3/LOC122871413/LOC122873669/LOC122873767/LOC122875528/LOC122877917/LOC122881975/LOC122881976/LOC122885641/LOC122888546/mmp9/mrtfbb/myot/ndnf/nsmfb/osgin2/plat/podn/reln/si:ch211-278a6.1/snai1a/snai2/swap70a/tafa5a	18	gene-apln/gene-carmil2/gene-cebpa/gene-lamb3/gene-LOC122871413/gene-LOC122873767/gene-LOC122875528/gene-LOC122877917/gene-LOC122881975/gene-LOC122881976/gene-LOC122885641/gene-mmp9/gene-myot/gene-nsmfb/gene-osgin2/gene-plat/gene-podn/gene-si:ch211-278a6.1	10
BP	GO:0044419	biological process involved in interspecies interaction between organisms	22/430	299/11595	0.00174514590210424	0.0828944303499515	gene-pstpip1b/gene-nlrc5/gene-LOC122876757/gene-LOC122878212/gene-LOC122878108/gene-pglyrp5/gene-ptx3a/gene-LOC122881737/gene-LOC122881776/gene-LOC122881039/gene-wdfy4/gene-ifih1/gene-rsad2/gene-cmpk2/gene-nfkbiaa/gene-ch25h/gene-LOC122868841/gene-dhx58/gene-LOC122868820/gene-LOC122869242/gene-LOC122870587/gene-LOC122870595	22	ch25h/cmpk2/dhx58/ifih1/LOC122868820/LOC122868841/LOC122869242/LOC122870587/LOC122870595/LOC122876757/LOC122878108/LOC122878212/LOC122881039/LOC122881737/LOC122881776/nfkbiaa/nlrc5/pglyrp5/pstpip1b/ptx3a/rsad2/wdfy4	17	gene-ch25h/gene-cmpk2/gene-dhx58/gene-ifih1/gene-LOC122868841/gene-LOC122869242/gene-LOC122870587/gene-LOC122876757/gene-LOC122878108/gene-LOC122878212/gene-LOC122881776/gene-nfkbiaa/gene-nlrc5/gene-pstpip1b/gene-ptx3a/gene-rsad2/gene-wdfy4	5
BP	GO:1901701	cellular response to oxygen-containing compound	11/430	109/11595	0.00234704799560033	0.107888496571951	gene-LOC122864683/gene-LOC122877917/gene-pid1/gene-snai2/gene-cmpk2/gene-tnca/gene-LOC122865952/gene-LOC122868820/gene-cbx8a/gene-si:ch73-335l21.1/gene-LOC122870595	11	cbx8a/cmpk2/LOC122864683/LOC122865952/LOC122868820/LOC122870595/LOC122877917/pid1/si:ch73-335l21.1/snai2/tnca	3	gene-cmpk2/gene-LOC122864683/gene-LOC122877917	8
BP	GO:0045216	cell-cell junction organization	5/430	27/11595	0.00281506028921025	0.125358153503894	gene-LOC122872091/gene-snai2/gene-pdzph1/gene-si:ch211-198m17.1/gene-LOC122869537	5	LOC122869537/LOC122872091/pdzph1/si:ch211-198m17.1/snai2	2	gene-LOC122869537/gene-pdzph1	3
BP	GO:0010033	response to organic substance	30/430	475/11595	0.00309382658739912	0.133597057183144	gene-smad3a/gene-LOC122863684/gene-fgf7/gene-LOC122864683/gene-cxcl12b/gene-smad6b/gene-LOC122878212/gene-ndnf/gene-LOC122877917/gene-pid1/gene-LOC122880049/gene-csf1ra/gene-LOC122881519/gene-snai2/gene-smad9/gene-LOC122888753/gene-id2a/gene-cmpk2/gene-paqr8/gene-tnca/gene-LOC122865952/gene-smad7/gene-bambia/gene-nog2/gene-wbp2/gene-LOC122868820/gene-LOC122869242/gene-si:ch73-335l21.1/gene-LOC122…	30	bambia/cmpk2/csf1ra/cxcl12b/fgf7/id2a/LOC122863684/LOC122864683/LOC122865952/LOC122868820/LOC122869242/LOC122870595/LOC122871826/LOC122877917/LOC122878212/LOC122880049/LOC122881519/LOC122888753/ndnf/nog2/paqr8/pid1/si:ch73-335l21.1/smad3a/smad6b/smad7/smad9/snai2/tnca/wbp2	11	gene-cmpk2/gene-csf1ra/gene-LOC122864683/gene-LOC122869242/gene-LOC122877917/gene-LOC122878212/gene-LOC122880049/gene-LOC122881519/gene-LOC122888753/gene-paqr8/gene-wbp2	19
BP	GO:0007167	enzyme linked receptor protein signaling pathway	19/430	257/11595	0.00332947566863314	0.139544200817713	gene-smad3a/gene-LOC122863684/gene-fgf7/gene-smad6b/gene-pid1/gene-kdrl/gene-LOC122880049/gene-csf1ra/gene-LOC122881519/gene-LOC122887564/gene-smad9/gene-LOC122888753/gene-id2a/gene-efna1a/gene-smad7/gene-bambia/gene-nog2/gene-si:ch73-335l21.1/gene-LOC122871826	19	bambia/csf1ra/efna1a/fgf7/id2a/kdrl/LOC122863684/LOC122871826/LOC122880049/LOC122881519/LOC122887564/LOC122888753/nog2/pid1/si:ch73-335l21.1/smad3a/smad6b/smad7/smad9	5	gene-csf1ra/gene-efna1a/gene-LOC122880049/gene-LOC122881519/gene-LOC122888753	14
BP	GO:0035295	tube development	22/430	320/11595	0.00400974296977628	0.16325382091232	gene-skib/gene-LOC122870658/gene-LOC122877908/gene-amotl2a/gene-nlgn1/gene-LOC122877917/gene-apln/gene-kdrl/gene-LOC122881975/gene-LOC122881976/gene-vegfaa/gene-angptl4/gene-LOC122887564/gene-LOC122888753/gene-grhl2b/gene-pard6gb/gene-tnca/gene-LOC122869378/gene-mrtfbb/gene-hspa12b/gene-tafa5a/gene-rcan1b	22	amotl2a/angptl4/apln/grhl2b/hspa12b/kdrl/LOC122869378/LOC122870658/LOC122877908/LOC122877917/LOC122881975/LOC122881976/LOC122887564/LOC122888753/mrtfbb/nlgn1/pard6gb/rcan1b/skib/tafa5a/tnca/vegfaa	13	gene-apln/gene-grhl2b/gene-hspa12b/gene-LOC122869378/gene-LOC122870658/gene-LOC122877908/gene-LOC122877917/gene-LOC122881975/gene-LOC122881976/gene-LOC122888753/gene-nlgn1/gene-rcan1b/gene-vegfaa	9
BP	GO:0030334	regulation of cell migration	11/430	118/11595	0.00435245808700325	0.172284799277212	gene-swap70a/gene-nsmfb/gene-podn/gene-LOC122877917/gene-LOC122881975/gene-LOC122881976/gene-osgin2/gene-snai2/gene-si:ch211-278a6.1/gene-LOC122871413/gene-tafa5a	11	LOC122871413/LOC122877917/LOC122881975/LOC122881976/nsmfb/osgin2/podn/si:ch211-278a6.1/snai2/swap70a/tafa5a	8	gene-LOC122871413/gene-LOC122877917/gene-LOC122881975/gene-LOC122881976/gene-nsmfb/gene-osgin2/gene-podn/gene-si:ch211-278a6.1	3
BP	GO:0030851	granulocyte differentiation	3/430	10/11595	0.00500218906085228	0.192651875992284	gene-cebpa/gene-cfap251/gene-zbtb46	3	cebpa/cfap251/zbtb46	2	gene-cebpa/gene-cfap251	1
BP	GO:0030036	actin cytoskeleton organization	21/430	312/11595	0.00619082574771644	0.225060004749419	gene-swap70a/gene-pstpip1b/gene-LOC122885147/gene-LOC122872091/gene-LOC122873669/gene-parvb/gene-lrrc39/gene-amotl2a/gene-LOC122880325/gene-fmn2a/gene-xirp1/gene-adss1/gene-LOC122861414/gene-fmn1/gene-LOC122867164/gene-LOC122869123/gene-mrtfbb/gene-LOC122871423/gene-eps8a/gene-LOC122871413/gene-xirp2a	21	adss1/amotl2a/eps8a/fmn1/fmn2a/LOC122861414/LOC122867164/LOC122869123/LOC122871413/LOC122871423/LOC122872091/LOC122873669/LOC122880325/LOC122885147/lrrc39/mrtfbb/parvb/pstpip1b/swap70a/xirp1/xirp2a	14	gene-adss1/gene-eps8a/gene-fmn1/gene-LOC122861414/gene-LOC122869123/gene-LOC122871413/gene-LOC122871423/gene-LOC122880325/gene-LOC122885147/gene-lrrc39/gene-parvb/gene-pstpip1b/gene-xirp1/gene-xirp2a	7
BP	GO:0008154	actin polymerization or depolymerization	11/430	124/11595	0.00631747381752754	0.225060004749419	gene-swap70a/gene-pstpip1b/gene-LOC122885147/gene-LOC122872091/gene-fmn2a/gene-LOC122861414/gene-fmn1/gene-LOC122867164/gene-LOC122869123/gene-LOC122871423/gene-eps8a	11	eps8a/fmn1/fmn2a/LOC122861414/LOC122867164/LOC122869123/LOC122871423/LOC122872091/LOC122885147/pstpip1b/swap70a	7	gene-eps8a/gene-fmn1/gene-LOC122861414/gene-LOC122869123/gene-LOC122871423/gene-LOC122885147/gene-pstpip1b	4
BP	GO:2000145	regulation of cell motility	11/430	124/11595	0.00631747381752754	0.225060004749419	gene-swap70a/gene-nsmfb/gene-podn/gene-LOC122877917/gene-LOC122881975/gene-LOC122881976/gene-osgin2/gene-snai2/gene-si:ch211-278a6.1/gene-LOC122871413/gene-tafa5a	11	LOC122871413/LOC122877917/LOC122881975/LOC122881976/nsmfb/osgin2/podn/si:ch211-278a6.1/snai2/swap70a/tafa5a	8	gene-LOC122871413/gene-LOC122877917/gene-LOC122881975/gene-LOC122881976/gene-nsmfb/gene-osgin2/gene-podn/gene-si:ch211-278a6.1	3
BP	GO:0007584	response to nutrient	3/430	11/11595	0.00669047050940414	0.232534645753681	gene-snai2/gene-tnca/gene-LOC122865952	3	LOC122865952/snai2/tnca	0	-	3
BP	GO:0050900	leukocyte migration	5/430	33/11595	0.00689856963159937	0.234058612500693	gene-swap70a/gene-LOC122873767/gene-LOC122881975/gene-LOC122881976/gene-mmp9	5	LOC122873767/LOC122881975/LOC122881976/mmp9/swap70a	4	gene-LOC122873767/gene-LOC122881975/gene-LOC122881976/gene-mmp9	1
BP	GO:0030029	actin filament-based process	21/430	317/11595	0.00737891539473175	0.244533824127738	gene-swap70a/gene-pstpip1b/gene-LOC122885147/gene-LOC122872091/gene-LOC122873669/gene-parvb/gene-lrrc39/gene-amotl2a/gene-LOC122880325/gene-fmn2a/gene-xirp1/gene-adss1/gene-LOC122861414/gene-fmn1/gene-LOC122867164/gene-LOC122869123/gene-mrtfbb/gene-LOC122871423/gene-eps8a/gene-LOC122871413/gene-xirp2a	21	adss1/amotl2a/eps8a/fmn1/fmn2a/LOC122861414/LOC122867164/LOC122869123/LOC122871413/LOC122871423/LOC122872091/LOC122873669/LOC122880325/LOC122885147/lrrc39/mrtfbb/parvb/pstpip1b/swap70a/xirp1/xirp2a	14	gene-adss1/gene-eps8a/gene-fmn1/gene-LOC122861414/gene-LOC122869123/gene-LOC122871413/gene-LOC122871423/gene-LOC122880325/gene-LOC122885147/gene-lrrc39/gene-parvb/gene-pstpip1b/gene-xirp1/gene-xirp2a	7
BP	GO:0072523	purine-containing compound catabolic process	3/430	12/11595	0.00867786420699878	0.275169161347436	gene-LOC122872164/gene-gda/gene-pde4ba	3	gda/LOC122872164/pde4ba	2	gene-gda/gene-LOC122872164	1
BP	GO:0051607	defense response to virus	5/430	35/11595	0.00888265362946109	0.275169161347436	gene-LOC122878212/gene-ifih1/gene-rsad2/gene-ch25h/gene-dhx58	5	ch25h/dhx58/ifih1/LOC122878212/rsad2	5	gene-ch25h/gene-dhx58/gene-ifih1/gene-LOC122878212/gene-rsad2	0
BP	GO:0140546	defense response to symbiont	5/430	35/11595	0.00888265362946109	0.275169161347436	gene-LOC122878212/gene-ifih1/gene-rsad2/gene-ch25h/gene-dhx58	5	ch25h/dhx58/ifih1/LOC122878212/rsad2	5	gene-ch25h/gene-dhx58/gene-ifih1/gene-LOC122878212/gene-rsad2	0
BP	GO:0034330	cell junction organization	10/430	113/11595	0.00916491251942523	0.277872347663425	gene-LOC122872091/gene-pclob/gene-nlgn1/gene-snai2/gene-cnksr1/gene-tnca/gene-pdzph1/gene-si:ch211-198m17.1/gene-si:ch211-278a6.1/gene-LOC122869537	10	cnksr1/LOC122869537/LOC122872091/nlgn1/pclob/pdzph1/si:ch211-198m17.1/si:ch211-278a6.1/snai2/tnca	5	gene-LOC122869537/gene-nlgn1/gene-pclob/gene-pdzph1/gene-si:ch211-278a6.1	5
BP	GO:0051270	regulation of cellular component movement	11/430	132/11595	0.00994995841703397	0.295389390505696	gene-swap70a/gene-nsmfb/gene-podn/gene-LOC122877917/gene-LOC122881975/gene-LOC122881976/gene-osgin2/gene-snai2/gene-si:ch211-278a6.1/gene-LOC122871413/gene-tafa5a	11	LOC122871413/LOC122877917/LOC122881975/LOC122881976/nsmfb/osgin2/podn/si:ch211-278a6.1/snai2/swap70a/tafa5a	8	gene-LOC122871413/gene-LOC122877917/gene-LOC122881975/gene-LOC122881976/gene-nsmfb/gene-osgin2/gene-podn/gene-si:ch211-278a6.1	3
BP	GO:0001503	ossification	6/430	52/11595	0.012090582844217	0.351613888836923	gene-pth4/gene-mmp9/gene-snai2/gene-tgfb3/gene-pthlha/gene-lrrc17	6	lrrc17/mmp9/pth4/pthlha/snai2/tgfb3	2	gene-mmp9/gene-pth4	4
BP	GO:0002573	myeloid leukocyte differentiation	4/430	25/11595	0.0127144423510199	0.352241563534754	gene-cebpa/gene-cfap251/gene-zbtb46/gene-lrrc17	4	cebpa/cfap251/lrrc17/zbtb46	2	gene-cebpa/gene-cfap251	2
BP	GO:0042127	regulation of cell population proliferation	16/430	233/11595	0.0132100574317597	0.352241563534754	gene-podn/gene-LOC122877917/gene-pid1/gene-osgin2/gene-LOC122883012/gene-snai2/gene-irf1b/gene-id2a/gene-fgfr3/gene-ndrg1a/gene-tnca/gene-LOC122865952/gene-cbx8a/gene-LOC122869242/gene-sapcd1/gene-tafa5a	16	cbx8a/fgfr3/id2a/irf1b/LOC122865952/LOC122869242/LOC122877917/LOC122883012/ndrg1a/osgin2/pid1/podn/sapcd1/snai2/tafa5a/tnca	8	gene-irf1b/gene-LOC122869242/gene-LOC122877917/gene-LOC122883012/gene-ndrg1a/gene-osgin2/gene-podn/gene-sapcd1	8
BP	GO:0031102	neuron projection regeneration	3/430	14/11595	0.0135893236679125	0.352241563534754	gene-LOC122877917/gene-omgb/gene-tnca	3	LOC122877917/omgb/tnca	2	gene-LOC122877917/gene-omgb	1
BP	GO:0031103	axon regeneration	3/430	14/11595	0.0135893236679125	0.352241563534754	gene-LOC122877917/gene-omgb/gene-tnca	3	LOC122877917/omgb/tnca	2	gene-LOC122877917/gene-omgb	1
BP	GO:0061035	regulation of cartilage development	3/430	14/11595	0.0135893236679125	0.352241563534754	gene-LOC122881519/gene-snai2/gene-tgfb3	3	LOC122881519/snai2/tgfb3	1	gene-LOC122881519	2
BP	GO:0040012	regulation of locomotion	11/430	138/11595	0.0135952884171308	0.352241563534754	gene-swap70a/gene-nsmfb/gene-podn/gene-LOC122877917/gene-LOC122881975/gene-LOC122881976/gene-osgin2/gene-snai2/gene-si:ch211-278a6.1/gene-LOC122871413/gene-tafa5a	11	LOC122871413/LOC122877917/LOC122881975/LOC122881976/nsmfb/osgin2/podn/si:ch211-278a6.1/snai2/swap70a/tafa5a	8	gene-LOC122871413/gene-LOC122877917/gene-LOC122881975/gene-LOC122881976/gene-nsmfb/gene-osgin2/gene-podn/gene-si:ch211-278a6.1	3
BP	GO:0046916	cellular transition metal ion homeostasis	4/430	26/11595	0.014596220369161	0.371421679036686	gene-LOC122881776/gene-LOC122881039/gene-slc31a2/gene-LOC122868396	4	LOC122868396/LOC122881039/LOC122881776/slc31a2	3	gene-LOC122868396/gene-LOC122881776/gene-slc31a2	1
BP	GO:0098542	defense response to other organism	15/430	219/11595	0.016458366562766	0.407496481768197	gene-pstpip1b/gene-nlrc5/gene-LOC122878212/gene-pglyrp5/gene-ptx3a/gene-LOC122881737/gene-LOC122881776/gene-LOC122881039/gene-ifih1/gene-rsad2/gene-ch25h/gene-LOC122868841/gene-dhx58/gene-LOC122869242/gene-LOC122870595	15	ch25h/dhx58/ifih1/LOC122868841/LOC122869242/LOC122870595/LOC122878212/LOC122881039/LOC122881737/LOC122881776/nlrc5/pglyrp5/pstpip1b/ptx3a/rsad2	11	gene-ch25h/gene-dhx58/gene-ifih1/gene-LOC122868841/gene-LOC122869242/gene-LOC122878212/gene-LOC122881776/gene-nlrc5/gene-pstpip1b/gene-ptx3a/gene-rsad2	4
BP	GO:0007015	actin filament organization	13/430	180/11595	0.016585821714074	0.407496481768197	gene-swap70a/gene-pstpip1b/gene-LOC122885147/gene-LOC122872091/gene-LOC122873669/gene-LOC122880325/gene-fmn2a/gene-LOC122861414/gene-fmn1/gene-LOC122867164/gene-LOC122869123/gene-LOC122871423/gene-eps8a	13	eps8a/fmn1/fmn2a/LOC122861414/LOC122867164/LOC122869123/LOC122871423/LOC122872091/LOC122873669/LOC122880325/LOC122885147/pstpip1b/swap70a	8	gene-eps8a/gene-fmn1/gene-LOC122861414/gene-LOC122869123/gene-LOC122871423/gene-LOC122880325/gene-LOC122885147/gene-pstpip1b	5
BP	GO:0071774	response to fibroblast growth factor	5/430	41/11595	0.0171185688497254	0.413456959506079	gene-fgf7/gene-ndnf/gene-LOC122880049/gene-LOC122888753/gene-tnca	5	fgf7/LOC122880049/LOC122888753/ndnf/tnca	2	gene-LOC122880049/gene-LOC122888753	3
BP	GO:0034446	substrate adhesion-dependent cell spreading	3/430	16/11595	0.0197918763433717	0.442316346167862	gene-lamb3/gene-LOC122872091/gene-si:ch211-278a6.1	3	lamb3/LOC122872091/si:ch211-278a6.1	2	gene-lamb3/gene-si:ch211-278a6.1	1
BP	GO:0050906	detection of stimulus involved in sensory perception	3/430	16/11595	0.0197918763433717	0.442316346167862	gene-LOC122878347/gene-LOC122863926/gene-LOC122865803	3	LOC122863926/LOC122865803/LOC122878347	3	gene-LOC122863926/gene-LOC122865803/gene-LOC122878347	0
BP	GO:0071219	cellular response to molecule of bacterial origin	3/430	16/11595	0.0197918763433717	0.442316346167862	gene-cmpk2/gene-LOC122868820/gene-LOC122870595	3	cmpk2/LOC122868820/LOC122870595	1	gene-cmpk2	2
BP	GO:0071222	cellular response to lipopolysaccharide	3/430	16/11595	0.0197918763433717	0.442316346167862	gene-cmpk2/gene-LOC122868820/gene-LOC122870595	3	cmpk2/LOC122868820/LOC122870595	1	gene-cmpk2	2
BP	GO:0045087	innate immune response	12/430	165/11595	0.0198654358980654	0.442316346167862	gene-pstpip1b/gene-nlrc5/gene-LOC122878212/gene-pglyrp5/gene-ptx3a/gene-LOC122881737/gene-ifih1/gene-rsad2/gene-LOC122868841/gene-dhx58/gene-LOC122869242/gene-LOC122870595	12	dhx58/ifih1/LOC122868841/LOC122869242/LOC122870595/LOC122878212/LOC122881737/nlrc5/pglyrp5/pstpip1b/ptx3a/rsad2	9	gene-dhx58/gene-ifih1/gene-LOC122868841/gene-LOC122869242/gene-LOC122878212/gene-nlrc5/gene-pstpip1b/gene-ptx3a/gene-rsad2	3
BP	GO:0071407	cellular response to organic cyclic compound	5/430	43/11595	0.020710096045098	0.451119374241932	gene-LOC122878212/gene-LOC122877917/gene-snai2/gene-tnca/gene-LOC122865952	5	LOC122865952/LOC122877917/LOC122878212/snai2/tnca	2	gene-LOC122877917/gene-LOC122878212	3
BP	GO:0019318	hexose metabolic process	7/430	75/11595	0.0208939499648895	0.451119374241932	gene-h6pd/gene-fbp2/gene-insb/gene-LOC122883245/gene-galt/gene-pck2/gene-pfkfb3	7	fbp2/galt/h6pd/insb/LOC122883245/pck2/pfkfb3	7	gene-fbp2/gene-galt/gene-h6pd/gene-insb/gene-LOC122883245/gene-pck2/gene-pfkfb3	0
BP	GO:0009617	response to bacterium	10/430	131/11595	0.0237812272053574	0.499444160100673	gene-LOC122878108/gene-pglyrp5/gene-LOC122881737/gene-LOC122881776/gene-LOC122881039/gene-cmpk2/gene-LOC122868820/gene-LOC122869242/gene-LOC122870587/gene-LOC122870595	10	cmpk2/LOC122868820/LOC122869242/LOC122870587/LOC122870595/LOC122878108/LOC122881039/LOC122881737/LOC122881776/pglyrp5	5	gene-cmpk2/gene-LOC122869242/gene-LOC122870587/gene-LOC122878108/gene-LOC122881776	5
BP	GO:0001764	neuron migration	4/430	30/11595	0.0238331248328742	0.499444160100673	gene-reln/gene-nsmfb/gene-ndnf/gene-mrtfbb	4	mrtfbb/ndnf/nsmfb/reln	1	gene-nsmfb	3
BP	GO:0098742	cell-cell adhesion via plasma-membrane adhesion molecules	11/430	151/11595	0.0248579126242535	0.513369934631323	gene-LOC122877917/gene-LOC122880019/gene-LOC122880009/gene-LOC122880002/gene-LOC122880010/gene-LOC122879996/gene-LOC122880004/gene-LOC122880007/gene-cdhr2/gene-clstn3/gene-pcdh15a	11	cdhr2/clstn3/LOC122877917/LOC122879996/LOC122880002/LOC122880004/LOC122880007/LOC122880009/LOC122880010/LOC122880019/pcdh15a	10	gene-cdhr2/gene-clstn3/gene-LOC122877917/gene-LOC122879996/gene-LOC122880002/gene-LOC122880004/gene-LOC122880007/gene-LOC122880009/gene-LOC122880010/gene-LOC122880019	1
BP	GO:0033993	response to lipid	9/430	114/11595	0.0257060728871249	0.523302198059329	gene-LOC122877917/gene-snai2/gene-cmpk2/gene-paqr8/gene-tnca/gene-LOC122865952/gene-LOC122868820/gene-LOC122869242/gene-LOC122870595	9	cmpk2/LOC122865952/LOC122868820/LOC122869242/LOC122870595/LOC122877917/paqr8/snai2/tnca	4	gene-cmpk2/gene-LOC122869242/gene-LOC122877917/gene-paqr8	5
BP	GO:0034329	cell junction assembly	5/430	46/11595	0.0269637257171016	0.533066013694399	gene-LOC122872091/gene-pclob/gene-snai2/gene-si:ch211-198m17.1/gene-LOC122869537	5	LOC122869537/LOC122872091/pclob/si:ch211-198m17.1/snai2	2	gene-LOC122869537/gene-pclob	3
BP	GO:0009166	nucleotide catabolic process	3/430	18/11595	0.027307943157678	0.533066013694399	gene-dut/gene-LOC122872164/gene-pde4ba	3	dut/LOC122872164/pde4ba	1	gene-LOC122872164	2
BP	GO:0048678	response to axon injury	3/430	18/11595	0.027307943157678	0.533066013694399	gene-LOC122877917/gene-omgb/gene-tnca	3	LOC122877917/omgb/tnca	2	gene-LOC122877917/gene-omgb	1
BP	GO:0007156	homophilic cell adhesion via plasma membrane adhesion molecules	10/430	135/11595	0.028548829758348	0.549757870346565	gene-LOC122880019/gene-LOC122880009/gene-LOC122880002/gene-LOC122880010/gene-LOC122879996/gene-LOC122880004/gene-LOC122880007/gene-cdhr2/gene-clstn3/gene-pcdh15a	10	cdhr2/clstn3/LOC122879996/LOC122880002/LOC122880004/LOC122880007/LOC122880009/LOC122880010/LOC122880019/pcdh15a	9	gene-cdhr2/gene-clstn3/gene-LOC122879996/gene-LOC122880002/gene-LOC122880004/gene-LOC122880007/gene-LOC122880009/gene-LOC122880010/gene-LOC122880019	1
BP	GO:0006006	glucose metabolic process	5/430	47/11595	0.0292877422173426	0.55646710212951	gene-h6pd/gene-fbp2/gene-insb/gene-LOC122883245/gene-pck2	5	fbp2/h6pd/insb/LOC122883245/pck2	5	gene-fbp2/gene-h6pd/gene-insb/gene-LOC122883245/gene-pck2	0
BP	GO:0005996	monosaccharide metabolic process	7/430	81/11595	0.0303679526515973	0.56939911221745	gene-h6pd/gene-fbp2/gene-insb/gene-LOC122883245/gene-galt/gene-pck2/gene-pfkfb3	7	fbp2/galt/h6pd/insb/LOC122883245/pck2/pfkfb3	7	gene-fbp2/gene-galt/gene-h6pd/gene-insb/gene-LOC122883245/gene-pck2/gene-pfkfb3	0
BP	GO:0002685	regulation of leukocyte migration	3/430	19/11595	0.0315579990913533	0.584027905262058	gene-swap70a/gene-LOC122881975/gene-LOC122881976	3	LOC122881975/LOC122881976/swap70a	2	gene-LOC122881975/gene-LOC122881976	1
BP	GO:0007267	cell-cell signaling	20/430	345/11595	0.0323182788668773	0.586618690420437	gene-slc12a5a/gene-lef1/gene-nsmfb/gene-apba1a/gene-plpp3/gene-nlgn1/gene-LOC122877917/gene-LOC122881246/gene-LOC122884881/gene-wnt6b/gene-tmem198a/gene-snai2/gene-dlgap2a/gene-tnca/gene-bambia/gene-LOC122869123/gene-wnt5b/gene-LOC122871213/gene-caprin2/gene-LOC122871823	20	apba1a/bambia/caprin2/dlgap2a/lef1/LOC122869123/LOC122871213/LOC122871823/LOC122877917/LOC122881246/LOC122884881/nlgn1/nsmfb/plpp3/slc12a5a/snai2/tmem198a/tnca/wnt5b/wnt6b	11	gene-apba1a/gene-caprin2/gene-dlgap2a/gene-lef1/gene-LOC122869123/gene-LOC122877917/gene-nlgn1/gene-nsmfb/gene-slc12a5a/gene-tmem198a/gene-wnt6b	9
BP	GO:0007163	establishment or maintenance of cell polarity	4/430	33/11595	0.0326434096028029	0.586618690420437	gene-LOC122875528/gene-carmil2/gene-pard6gb/gene-sapcd1	4	carmil2/LOC122875528/pard6gb/sapcd1	3	gene-carmil2/gene-LOC122875528/gene-sapcd1	1
BP	GO:0032870	cellular response to hormone stimulus	6/430	65/11595	0.0329329791113228	0.586618690420437	gene-LOC122864683/gene-pid1/gene-tnca/gene-LOC122865952/gene-wbp2/gene-si:ch73-335l21.1	6	LOC122864683/LOC122865952/pid1/si:ch73-335l21.1/tnca/wbp2	2	gene-LOC122864683/gene-wbp2	4
BP	GO:0002429	immune response-activating cell surface receptor signaling pathway	3/430	20/11595	0.0361328476547421	0.605756563623618	gene-LOC122870587/gene-LOC122869735/gene-LOC122869738	3	LOC122869735/LOC122869738/LOC122870587	3	gene-LOC122869735/gene-LOC122869738/gene-LOC122870587	0
BP	GO:0002757	immune response-activating signal transduction	3/430	20/11595	0.0361328476547421	0.605756563623618	gene-LOC122870587/gene-LOC122869735/gene-LOC122869738	3	LOC122869735/LOC122869738/LOC122870587	3	gene-LOC122869735/gene-LOC122869738/gene-LOC122870587	0
BP	GO:0006879	cellular iron ion homeostasis	3/430	20/11595	0.0361328476547421	0.605756563623618	gene-LOC122881776/gene-LOC122881039/gene-LOC122868396	3	LOC122868396/LOC122881039/LOC122881776	2	gene-LOC122868396/gene-LOC122881776	1
BP	GO:0050851	antigen receptor-mediated signaling pathway	3/430	20/11595	0.0361328476547421	0.605756563623618	gene-LOC122870587/gene-LOC122869735/gene-LOC122869738	3	LOC122869735/LOC122869738/LOC122870587	3	gene-LOC122869735/gene-LOC122869738/gene-LOC122870587	0
BP	GO:0090263	positive regulation of canonical Wnt signaling pathway	3/430	20/11595	0.0361328476547421	0.605756563623618	gene-tmem198a/gene-bambia/gene-caprin2	3	bambia/caprin2/tmem198a	2	gene-caprin2/gene-tmem198a	1
BP	GO:0017015	regulation of transforming growth factor beta receptor signaling pathway	3/430	21/11595	0.0410284955342389	0.649617845958782	gene-LOC122881519/gene-bambia/gene-LOC122871826	3	bambia/LOC122871826/LOC122881519	1	gene-LOC122881519	2
BP	GO:0034599	cellular response to oxidative stress	3/430	21/11595	0.0410284955342389	0.649617845958782	gene-LOC122877917/gene-cbx8a/gene-nfe2l1a	3	cbx8a/LOC122877917/nfe2l1a	2	gene-LOC122877917/gene-nfe2l1a	1
BP	GO:0071216	cellular response to biotic stimulus	3/430	21/11595	0.0410284955342389	0.649617845958782	gene-cmpk2/gene-LOC122868820/gene-LOC122870595	3	cmpk2/LOC122868820/LOC122870595	1	gene-cmpk2	2
BP	GO:1901292	nucleoside phosphate catabolic process	3/430	21/11595	0.0410284955342389	0.649617845958782	gene-dut/gene-LOC122872164/gene-pde4ba	3	dut/LOC122872164/pde4ba	1	gene-LOC122872164	2
BP	GO:1903844	regulation of cellular response to transforming growth factor beta stimulus	3/430	21/11595	0.0410284955342389	0.649617845958782	gene-LOC122881519/gene-bambia/gene-LOC122871826	3	bambia/LOC122871826/LOC122881519	1	gene-LOC122881519	2
BP	GO:0061008	hepaticobiliary system development	5/430	52/11595	0.0427751501449006	0.662605599055258	gene-cebpa/gene-add3a/gene-apln/gene-id2a/gene-mrtfbb	5	add3a/apln/cebpa/id2a/mrtfbb	3	gene-add3a/gene-apln/gene-cebpa	2
BP	GO:0048732	gland development	7/430	88/11595	0.0446364229196267	0.662605599055258	gene-cebpa/gene-apln/gene-lnx2b/gene-snai2/gene-id2a/gene-tnca/gene-mrtfbb	7	apln/cebpa/id2a/lnx2b/mrtfbb/snai2/tnca	2	gene-apln/gene-cebpa	5
BP	GO:0030041	actin filament polymerization	8/430	107/11595	0.0451573845973047	0.662605599055258	gene-pstpip1b/gene-LOC122885147/gene-LOC122872091/gene-fmn2a/gene-LOC122861414/gene-fmn1/gene-LOC122867164/gene-eps8a	8	eps8a/fmn1/fmn2a/LOC122861414/LOC122867164/LOC122872091/LOC122885147/pstpip1b	5	gene-eps8a/gene-fmn1/gene-LOC122861414/gene-LOC122885147/gene-pstpip1b	3
BP	GO:0008283	cell population proliferation	17/430	293/11595	0.0456654163533534	0.662605599055258	gene-amotl2a/gene-podn/gene-LOC122877917/gene-pid1/gene-osgin2/gene-LOC122883012/gene-snai2/gene-irf1b/gene-id2a/gene-fgfr3/gene-ndrg1a/gene-tnca/gene-LOC122865952/gene-cbx8a/gene-LOC122869242/gene-sapcd1/gene-tafa5a	17	amotl2a/cbx8a/fgfr3/id2a/irf1b/LOC122865952/LOC122869242/LOC122877917/LOC122883012/ndrg1a/osgin2/pid1/podn/sapcd1/snai2/tafa5a/tnca	8	gene-irf1b/gene-LOC122869242/gene-LOC122877917/gene-LOC122883012/gene-ndrg1a/gene-osgin2/gene-podn/gene-sapcd1	9
BP	GO:0008360	regulation of cell shape	3/430	22/11595	0.0462398473171268	0.662605599055258	gene-amotl2a/gene-LOC122867164/gene-LOC122869492	3	amotl2a/LOC122867164/LOC122869492	1	gene-LOC122869492	2
BP	GO:0006875	cellular metal ion homeostasis	5/430	54/11595	0.049061100550043	0.662605599055258	gene-swap70a/gene-LOC122881776/gene-LOC122881039/gene-slc31a2/gene-LOC122868396	5	LOC122868396/LOC122881039/LOC122881776/slc31a2/swap70a	3	gene-LOC122868396/gene-LOC122881776/gene-slc31a2	2
BP	GO:0007229	integrin-mediated signaling pathway	5/430	54/11595	0.049061100550043	0.662605599055258	gene-itga7/gene-LOC122888504/gene-itga1/gene-fybb/gene-itga3b	5	fybb/itga1/itga3b/itga7/LOC122888504	4	gene-fybb/gene-itga3b/gene-itga7/gene-LOC122888504	1
BP	GO:0010975	regulation of neuron projection development	5/430	54/11595	0.049061100550043	0.662605599055258	gene-ndnf/gene-LOC122877917/gene-omgb/gene-pard6gb/gene-si:ch211-278a6.1	5	LOC122877917/ndnf/omgb/pard6gb/si:ch211-278a6.1	3	gene-LOC122877917/gene-omgb/gene-si:ch211-278a6.1	2
BP	GO:0002200	somatic diversification of immune receptors	2/430	10/11595	0.0507001810736408	0.662605599055258	gene-swap70a/gene-LOC122868820	2	LOC122868820/swap70a	0	-	2
BP	GO:0002762	negative regulation of myeloid leukocyte differentiation	2/430	10/11595	0.0507001810736408	0.662605599055258	gene-zbtb46/gene-lrrc17	2	lrrc17/zbtb46	0	-	2
BP	GO:0007606	sensory perception of chemical stimulus	2/430	10/11595	0.0507001810736408	0.662605599055258	gene-LOC122878347/gene-LOC122863926	2	LOC122863926/LOC122878347	2	gene-LOC122863926/gene-LOC122878347	0
BP	GO:0009214	cyclic nucleotide catabolic process	2/430	10/11595	0.0507001810736408	0.662605599055258	gene-LOC122872164/gene-pde4ba	2	LOC122872164/pde4ba	1	gene-LOC122872164	1
BP	GO:0022612	gland morphogenesis	2/430	10/11595	0.0507001810736408	0.662605599055258	gene-snai2/gene-tnca	2	snai2/tnca	0	-	2
BP	GO:0042542	response to hydrogen peroxide	2/430	10/11595	0.0507001810736408	0.662605599055258	gene-LOC122877917/gene-cbx8a	2	cbx8a/LOC122877917	1	gene-LOC122877917	1
BP	GO:0050921	positive regulation of chemotaxis	2/430	10/11595	0.0507001810736408	0.662605599055258	gene-swap70a/gene-snai2	2	snai2/swap70a	0	-	2
BP	GO:0097205	renal filtration	2/430	10/11595	0.0507001810736408	0.662605599055258	gene-LOC122870658/gene-ctns	2	ctns/LOC122870658	2	gene-ctns/gene-LOC122870658	0
BP	GO:0097305	response to alcohol	2/430	10/11595	0.0507001810736408	0.662605599055258	gene-LOC122877917/gene-tnca	2	LOC122877917/tnca	1	gene-LOC122877917	1
BP	GO:0046058	cAMP metabolic process	3/430	23/11595	0.0517608271554812	0.662605599055258	gene-LOC122872164/gene-pde4ba/gene-LOC122869764	3	LOC122869764/LOC122872164/pde4ba	2	gene-LOC122869764/gene-LOC122872164	1
BP	GO:0022603	regulation of anatomical structure morphogenesis	10/430	150/11595	0.0524382993863576	0.662605599055258	gene-amotl2a/gene-LOC122877917/gene-omgb/gene-snai2/gene-pard6gb/gene-LOC122867164/gene-si:ch211-278a6.1/gene-LOC122869492/gene-sapcd1/gene-tafa5a	10	amotl2a/LOC122867164/LOC122869492/LOC122877917/omgb/pard6gb/sapcd1/si:ch211-278a6.1/snai2/tafa5a	5	gene-LOC122869492/gene-LOC122877917/gene-omgb/gene-sapcd1/gene-si:ch211-278a6.1	5
BP	GO:0007162	negative regulation of cell adhesion	4/430	39/11595	0.0552755937012118	0.662605599055258	gene-swap70a/gene-LOC122877917/gene-snai2/gene-tnca	4	LOC122877917/snai2/swap70a/tnca	1	gene-LOC122877917	3
BP	GO:0051017	actin filament bundle assembly	4/430	39/11595	0.0552755937012118	0.662605599055258	gene-swap70a/gene-LOC122880325/gene-LOC122867164/gene-eps8a	4	eps8a/LOC122867164/LOC122880325/swap70a	2	gene-eps8a/gene-LOC122880325	2
BP	GO:0055076	transition metal ion homeostasis	4/430	39/11595	0.0552755937012118	0.662605599055258	gene-LOC122881776/gene-LOC122881039/gene-slc31a2/gene-LOC122868396	4	LOC122868396/LOC122881039/LOC122881776/slc31a2	3	gene-LOC122868396/gene-LOC122881776/gene-slc31a2	1
BP	GO:1901136	carbohydrate derivative catabolic process	4/430	39/11595	0.0552755937012118	0.662605599055258	gene-dut/gene-LOC122872164/gene-pde4ba/gene-pglyrp5	4	dut/LOC122872164/pde4ba/pglyrp5	1	gene-LOC122872164	3
BP	GO:0060070	canonical Wnt signaling pathway	5/430	56/11595	0.055862970475802	0.662605599055258	gene-LOC122877917/gene-tmem198a/gene-snai2/gene-bambia/gene-caprin2	5	bambia/caprin2/LOC122877917/snai2/tmem198a	3	gene-caprin2/gene-LOC122877917/gene-tmem198a	2
BP	GO:0009725	response to hormone	7/430	93/11595	0.0570978413353689	0.662605599055258	gene-LOC122864683/gene-pid1/gene-paqr8/gene-tnca/gene-LOC122865952/gene-wbp2/gene-si:ch73-335l21.1	7	LOC122864683/LOC122865952/paqr8/pid1/si:ch73-335l21.1/tnca/wbp2	3	gene-LOC122864683/gene-paqr8/gene-wbp2	4
BP	GO:0010638	positive regulation of organelle organization	7/430	93/11595	0.0570978413353689	0.662605599055258	gene-swap70a/gene-znf703/gene-fmn2a/gene-LOC122886528/gene-snai2/gene-LOC122861414/gene-fmn1	7	fmn1/fmn2a/LOC122861414/LOC122886528/snai2/swap70a/znf703	3	gene-fmn1/gene-LOC122861414/gene-LOC122886528	4
BP	GO:0060326	cell chemotaxis	3/430	24/11595	0.0575844916941237	0.662605599055258	gene-swap70a/gene-LOC122873767/gene-snai2	3	LOC122873767/snai2/swap70a	1	gene-LOC122873767	2
BP	GO:0002040	sprouting angiogenesis	4/430	40/11595	0.05969635293477	0.662605599055258	gene-nlgn1/gene-LOC122877917/gene-hspa12b/gene-rcan1b	4	hspa12b/LOC122877917/nlgn1/rcan1b	4	gene-hspa12b/gene-LOC122877917/gene-nlgn1/gene-rcan1b	0
BP	GO:0044344	cellular response to fibroblast growth factor stimulus	4/430	40/11595	0.05969635293477	0.662605599055258	gene-fgf7/gene-ndnf/gene-LOC122880049/gene-LOC122888753	4	fgf7/LOC122880049/LOC122888753/ndnf	2	gene-LOC122880049/gene-LOC122888753	2
BP	GO:0006739	NADP metabolic process	2/430	11/11595	0.0604801167545822	0.662605599055258	gene-h6pd/gene-LOC122883245	2	h6pd/LOC122883245	2	gene-h6pd/gene-LOC122883245	0
BP	GO:0032104	regulation of response to extracellular stimulus	2/430	11/11595	0.0604801167545822	0.662605599055258	gene-snai2/gene-LOC122865952	2	LOC122865952/snai2	0	-	2
BP	GO:0032107	regulation of response to nutrient levels	2/430	11/11595	0.0604801167545822	0.662605599055258	gene-snai2/gene-LOC122865952	2	LOC122865952/snai2	0	-	2
BP	GO:0032602	chemokine production	2/430	11/11595	0.0604801167545822	0.662605599055258	gene-LOC122877917/gene-snai2	2	LOC122877917/snai2	1	gene-LOC122877917	1
BP	GO:0032642	regulation of chemokine production	2/430	11/11595	0.0604801167545822	0.662605599055258	gene-LOC122877917/gene-snai2	2	LOC122877917/snai2	1	gene-LOC122877917	1
BP	GO:0048659	smooth muscle cell proliferation	2/430	11/11595	0.0604801167545822	0.662605599055258	gene-LOC122877917/gene-tafa5a	2	LOC122877917/tafa5a	1	gene-LOC122877917	1
BP	GO:0048660	regulation of smooth muscle cell proliferation	2/430	11/11595	0.0604801167545822	0.662605599055258	gene-LOC122877917/gene-tafa5a	2	LOC122877917/tafa5a	1	gene-LOC122877917	1
BP	GO:0048668	collateral sprouting	2/430	11/11595	0.0604801167545822	0.662605599055258	gene-omgb/gene-pard6gb	2	omgb/pard6gb	1	gene-omgb	1
BP	GO:0072015	glomerular visceral epithelial cell development	2/430	11/11595	0.0604801167545822	0.662605599055258	gene-LOC122870658/gene-LOC122865952	2	LOC122865952/LOC122870658	1	gene-LOC122870658	1
BP	GO:0072310	glomerular epithelial cell development	2/430	11/11595	0.0604801167545822	0.662605599055258	gene-LOC122870658/gene-LOC122865952	2	LOC122865952/LOC122870658	1	gene-LOC122870658	1
BP	GO:0002520	immune system development	13/430	217/11595	0.0606475112484908	0.662605599055258	gene-cebpa/gene-swap70a/gene-tph2/gene-cfap251/gene-LOC122877917/gene-zbtb46/gene-gfi1aa/gene-tgfb3/gene-nfkbiaa/gene-flvcr1/gene-LOC122869123/gene-LOC122868820/gene-lrrc17	13	cebpa/cfap251/flvcr1/gfi1aa/LOC122868820/LOC122869123/LOC122877917/lrrc17/nfkbiaa/swap70a/tgfb3/tph2/zbtb46	7	gene-cebpa/gene-cfap251/gene-flvcr1/gene-gfi1aa/gene-LOC122869123/gene-LOC122877917/gene-nfkbiaa	6
BP	GO:0003007	heart morphogenesis	5/430	58/11595	0.0631811362973051	0.662605599055258	gene-skib/gene-lrrc39/gene-cadm4/gene-snai2/gene-mrtfbb	5	cadm4/lrrc39/mrtfbb/skib/snai2	2	gene-cadm4/gene-lrrc39	3
BP	GO:0006873	cellular ion homeostasis	5/430	58/11595	0.0631811362973051	0.662605599055258	gene-swap70a/gene-LOC122881776/gene-LOC122881039/gene-slc31a2/gene-LOC122868396	5	LOC122868396/LOC122881039/LOC122881776/slc31a2/swap70a	3	gene-LOC122868396/gene-LOC122881776/gene-slc31a2	2
BP	GO:0030003	cellular cation homeostasis	5/430	58/11595	0.0631811362973051	0.662605599055258	gene-swap70a/gene-LOC122881776/gene-LOC122881039/gene-slc31a2/gene-LOC122868396	5	LOC122868396/LOC122881039/LOC122881776/slc31a2/swap70a	3	gene-LOC122868396/gene-LOC122881776/gene-slc31a2	2
BP	GO:0002764	immune response-regulating signaling pathway	3/430	25/11595	0.0637031347863652	0.662605599055258	gene-LOC122870587/gene-LOC122869735/gene-LOC122869738	3	LOC122869735/LOC122869738/LOC122870587	3	gene-LOC122869735/gene-LOC122869738/gene-LOC122870587	0
BP	GO:0002768	immune response-regulating cell surface receptor signaling pathway	3/430	25/11595	0.0637031347863652	0.662605599055258	gene-LOC122870587/gene-LOC122869735/gene-LOC122869738	3	LOC122869735/LOC122869738/LOC122870587	3	gene-LOC122869735/gene-LOC122869738/gene-LOC122870587	0
BP	GO:0006730	one-carbon metabolic process	3/430	25/11595	0.0637031347863652	0.662605599055258	gene-ahcyl1/gene-hspa1b/gene-aldh1l2	3	ahcyl1/aldh1l2/hspa1b	2	gene-ahcyl1/gene-aldh1l2	1
BP	GO:1903034	regulation of response to wounding	3/430	25/11595	0.0637031347863652	0.662605599055258	gene-LOC122877917/gene-omgb/gene-tafa5a	3	LOC122877917/omgb/tafa5a	2	gene-LOC122877917/gene-omgb	1
BP	GO:0061572	actin filament bundle organization	4/430	41/11595	0.0642993566196397	0.663960747702801	gene-swap70a/gene-LOC122880325/gene-LOC122867164/gene-eps8a	4	eps8a/LOC122867164/LOC122880325/swap70a	2	gene-eps8a/gene-LOC122880325	2
BP	GO:0014070	response to organic cyclic compound	6/430	77/11595	0.0657228495494245	0.673777414445539	gene-LOC122878212/gene-LOC122877917/gene-snai2/gene-paqr8/gene-tnca/gene-LOC122865952	6	LOC122865952/LOC122877917/LOC122878212/paqr8/snai2/tnca	3	gene-LOC122877917/gene-LOC122878212/gene-paqr8	3
BP	GO:0051606	detection of stimulus	5/430	59/11595	0.0670331545468385	0.677502069472087	gene-LOC122887291/gene-LOC122878347/gene-parapinopsina/gene-LOC122863926/gene-LOC122865803	5	LOC122863926/LOC122865803/LOC122878347/LOC122887291/parapinopsina	5	gene-LOC122863926/gene-LOC122865803/gene-LOC122878347/gene-LOC122887291/gene-parapinopsina	0
BP	GO:1901605	alpha-amino acid metabolic process	7/430	97/11595	0.0684765873723805	0.677502069472087	gene-hal/gene-LOC122876127/gene-LOC122876938/gene-psat1/gene-ddah1/gene-arg2/gene-cbsa	7	arg2/cbsa/ddah1/hal/LOC122876127/LOC122876938/psat1	6	gene-arg2/gene-cbsa/gene-hal/gene-LOC122876127/gene-LOC122876938/gene-psat1	1
BP	GO:0030522	intracellular receptor signaling pathway	3/430	26/11595	0.0701083844929569	0.677502069472087	gene-snai2/gene-LOC122864108/gene-LOC122865952	3	LOC122864108/LOC122865952/snai2	1	gene-LOC122864108	2
BP	GO:0031056	regulation of histone modification	3/430	26/11595	0.0701083844929569	0.677502069472087	gene-znf703/gene-snai2/gene-gfi1aa	3	gfi1aa/snai2/znf703	1	gene-gfi1aa	2
BP	GO:0062197	cellular response to chemical stress	3/430	26/11595	0.0701083844929569	0.677502069472087	gene-LOC122877917/gene-cbx8a/gene-nfe2l1a	3	cbx8a/LOC122877917/nfe2l1a	2	gene-LOC122877917/gene-nfe2l1a	1
BP	GO:0001763	morphogenesis of a branching structure	2/430	12/11595	0.0708405672640989	0.677502069472087	gene-snai2/gene-tnca	2	snai2/tnca	0	-	2
BP	GO:0009070	serine family amino acid biosynthetic process	2/430	12/11595	0.0708405672640989	0.677502069472087	gene-psat1/gene-cbsa	2	cbsa/psat1	2	gene-cbsa/gene-psat1	0
BP	GO:0032922	circadian regulation of gene expression	2/430	12/11595	0.0708405672640989	0.677502069472087	gene-LOC122875367/gene-otx5	2	LOC122875367/otx5	1	gene-otx5	1
BP	GO:0050852	T cell receptor signaling pathway	2/430	12/11595	0.0708405672640989	0.677502069472087	gene-LOC122869735/gene-LOC122869738	2	LOC122869735/LOC122869738	2	gene-LOC122869735/gene-LOC122869738	0
BP	GO:1905269	positive regulation of chromatin organization	2/430	12/11595	0.0708405672640989	0.677502069472087	gene-znf703/gene-snai2	2	snai2/znf703	0	-	2
BP	GO:0030099	myeloid cell differentiation	6/430	80/11595	0.0761156145182222	0.689103427686843	gene-cebpa/gene-cfap251/gene-zbtb46/gene-flvcr1/gene-LOC122869123/gene-lrrc17	6	cebpa/cfap251/flvcr1/LOC122869123/lrrc17/zbtb46	4	gene-cebpa/gene-cfap251/gene-flvcr1/gene-LOC122869123	2
BP	GO:0006915	apoptotic process	21/430	405/11595	0.0761743660819693	0.689103427686843	gene-uacab/gene-ddit3/gene-LOC122875409/gene-LOC122877908/gene-ndnf/gene-LOC122877917/gene-tnfaip8l2b/gene-LOC122881737/gene-osgin2/gene-si:ch211-112c15.8/gene-LOC122883012/gene-snai2/gene-angptl4/gene-ripk2/gene-irf1b/gene-LOC122861357/gene-grhl2b/gene-LOC122865536/gene-LOC122865952/gene-LOC122868820/gene-phlda1	21	angptl4/ddit3/grhl2b/irf1b/LOC122861357/LOC122865536/LOC122865952/LOC122868820/LOC122875409/LOC122877908/LOC122877917/LOC122881737/LOC122883012/ndnf/osgin2/phlda1/ripk2/si:ch211-112c15.8/snai2/tnfaip8l2b/uacab	12	gene-ddit3/gene-grhl2b/gene-irf1b/gene-LOC122861357/gene-LOC122865536/gene-LOC122875409/gene-LOC122877908/gene-LOC122877917/gene-LOC122883012/gene-osgin2/gene-ripk2/gene-si:ch211-112c15.8	9
BP	GO:0009187	cyclic nucleotide metabolic process	3/430	27/11595	0.0767912928327804	0.689103427686843	gene-LOC122872164/gene-pde4ba/gene-LOC122869764	3	LOC122869764/LOC122872164/pde4ba	2	gene-LOC122869764/gene-LOC122872164	1
BP	GO:1901700	response to oxygen-containing compound	12/430	204/11595	0.0773955894746647	0.689103427686843	gene-LOC122864683/gene-LOC122877917/gene-pid1/gene-snai2/gene-cmpk2/gene-tnca/gene-LOC122865952/gene-LOC122868820/gene-cbx8a/gene-LOC122869242/gene-si:ch73-335l21.1/gene-LOC122870595	12	cbx8a/cmpk2/LOC122864683/LOC122865952/LOC122868820/LOC122869242/LOC122870595/LOC122877917/pid1/si:ch73-335l21.1/snai2/tnca	4	gene-cmpk2/gene-LOC122864683/gene-LOC122869242/gene-LOC122877917	8
BP	GO:0046434	organophosphate catabolic process	4/430	44/11595	0.079180634879455	0.689103427686843	gene-dut/gene-LOC122872164/gene-pde4ba/gene-smpdl3b	4	dut/LOC122872164/pde4ba/smpdl3b	1	gene-LOC122872164	3
BP	GO:1901653	cellular response to peptide	4/430	44/11595	0.079180634879455	0.689103427686843	gene-LOC122864683/gene-LOC122877917/gene-pid1/gene-si:ch73-335l21.1	4	LOC122864683/LOC122877917/pid1/si:ch73-335l21.1	2	gene-LOC122864683/gene-LOC122877917	2
BP	GO:0015074	DNA integration	6/430	81/11595	0.079775427467552	0.689103427686843	gene-LOC122882812/gene-LOC122865519/gene-LOC122868980/gene-LOC122869923/gene-LOC122871610/Novel.18	6	LOC122865519/LOC122868980/LOC122869923/LOC122871610/LOC122882812/Novel.18	6	gene-LOC122865519/gene-LOC122868980/gene-LOC122869923/gene-LOC122871610/gene-LOC122882812/Novel.18	0
BP	GO:0000097	sulfur amino acid biosynthetic process	2/430	13/11595	0.0817252486168958	0.689103427686843	gene-LOC122876938/gene-cbsa	2	cbsa/LOC122876938	2	gene-cbsa/gene-LOC122876938	0
BP	GO:0003014	renal system process	2/430	13/11595	0.0817252486168958	0.689103427686843	gene-LOC122870658/gene-ctns	2	ctns/LOC122870658	2	gene-ctns/gene-LOC122870658	0
BP	GO:0018149	peptide cross-linking	2/430	13/11595	0.0817252486168958	0.689103427686843	gene-tgm2b/gene-ndnf	2	ndnf/tgm2b	0	-	2
BP	GO:0030512	negative regulation of transforming growth factor beta receptor signaling pathway	2/430	13/11595	0.0817252486168958	0.689103427686843	gene-bambia/gene-LOC122871826	2	bambia/LOC122871826	0	-	2
BP	GO:0033002	muscle cell proliferation	2/430	13/11595	0.0817252486168958	0.689103427686843	gene-LOC122877917/gene-tafa5a	2	LOC122877917/tafa5a	1	gene-LOC122877917	1
BP	GO:0040029	regulation of gene expression, epigenetic	2/430	13/11595	0.0817252486168958	0.689103427686843	gene-wbp2/gene-cbx8a	2	cbx8a/wbp2	1	gene-wbp2	1
BP	GO:0043281	regulation of cysteine-type endopeptidase activity involved in apoptotic process	2/430	13/11595	0.0817252486168958	0.689103427686843	gene-LOC122877917/gene-LOC122881737	2	LOC122877917/LOC122881737	1	gene-LOC122877917	1
BP	GO:0045638	negative regulation of myeloid cell differentiation	2/430	13/11595	0.0817252486168958	0.689103427686843	gene-zbtb46/gene-lrrc17	2	lrrc17/zbtb46	0	-	2
BP	GO:0048268	clathrin coat assembly	2/430	13/11595	0.0817252486168958	0.689103427686843	gene-snap91a/gene-LOC122888042	2	LOC122888042/snap91a	2	gene-LOC122888042/gene-snap91a	0
BP	GO:0060840	artery development	2/430	13/11595	0.0817252486168958	0.689103427686843	gene-amotl2a/gene-pthlha	2	amotl2a/pthlha	0	-	2
BP	GO:1901532	regulation of hematopoietic progenitor cell differentiation	2/430	13/11595	0.0817252486168958	0.689103427686843	gene-tph2/gene-nfkbiaa	2	nfkbiaa/tph2	1	gene-nfkbiaa	1
BP	GO:1902807	negative regulation of cell cycle G1/S phase transition	2/430	13/11595	0.0817252486168958	0.689103427686843	gene-LOC122877917/gene-LOC122865952	2	LOC122865952/LOC122877917	1	gene-LOC122877917	1
BP	GO:2000134	negative regulation of G1/S transition of mitotic cell cycle	2/430	13/11595	0.0817252486168958	0.689103427686843	gene-LOC122877917/gene-LOC122865952	2	LOC122865952/LOC122877917	1	gene-LOC122877917	1
BP	GO:0015914	phospholipid transport	3/430	28/11595	0.0837424187282757	0.689785819004583	gene-atp8b4/gene-LOC122876099/gene-LOC122883087	3	atp8b4/LOC122876099/LOC122883087	3	gene-atp8b4/gene-LOC122876099/gene-LOC122883087	0
BP	GO:0031669	cellular response to nutrient levels	3/430	28/11595	0.0837424187282757	0.689785819004583	gene-snai2/gene-tnca/gene-LOC122865952	3	LOC122865952/snai2/tnca	0	-	3
BP	GO:0090101	negative regulation of transmembrane receptor protein serine/threonine kinase signaling pathway	3/430	28/11595	0.0837424187282757	0.689785819004583	gene-bambia/gene-nog2/gene-LOC122871826	3	bambia/LOC122871826/nog2	0	-	3
BP	GO:0097193	intrinsic apoptotic signaling pathway	3/430	28/11595	0.0837424187282757	0.689785819004583	gene-ddit3/gene-LOC122881737/gene-snai2	3	ddit3/LOC122881737/snai2	1	gene-ddit3	2
BP	GO:0050793	regulation of developmental process	21/430	412/11595	0.0872437913319327	0.713122373411076	gene-tph2/gene-amotl2a/gene-LOC122877917/gene-omgb/gene-LOC122881519/gene-zbtb46/gene-snai2/gene-LOC122887176/gene-tgfb3/gene-id2a/gene-nfkbiaa/gene-pard6gb/gene-nog2/gene-LOC122867164/gene-si:ch211-278a6.1/gene-mrtfbb/gene-LOC122869492/gene-lrrc17/gene-sapcd1/gene-tafa5a/gene-caprin2	21	amotl2a/caprin2/id2a/LOC122867164/LOC122869492/LOC122877917/LOC122881519/LOC122887176/lrrc17/mrtfbb/nfkbiaa/nog2/omgb/pard6gb/sapcd1/si:ch211-278a6.1/snai2/tafa5a/tgfb3/tph2/zbtb46	8	gene-caprin2/gene-LOC122869492/gene-LOC122877917/gene-LOC122881519/gene-nfkbiaa/gene-omgb/gene-sapcd1/gene-si:ch211-278a6.1	13
BP	GO:1901617	organic hydroxy compound biosynthetic process	5/430	64/11595	0.0881946304510836	0.713122373411076	gene-tph2/gene-itpkcb/gene-ddc/gene-snai2/gene-LOC122871599	5	ddc/itpkcb/LOC122871599/snai2/tph2	2	gene-ddc/gene-LOC122871599	3
BP	GO:0060828	regulation of canonical Wnt signaling pathway	4/430	46/11595	0.0899685767999261	0.713122373411076	gene-tmem198a/gene-snai2/gene-bambia/gene-caprin2	4	bambia/caprin2/snai2/tmem198a	2	gene-caprin2/gene-tmem198a	2
BP	GO:0031668	cellular response to extracellular stimulus	3/430	29/11595	0.0909519045643842	0.713122373411076	gene-snai2/gene-tnca/gene-LOC122865952	3	LOC122865952/snai2/tnca	0	-	3
BP	GO:0071496	cellular response to external stimulus	3/430	29/11595	0.0909519045643842	0.713122373411076	gene-snai2/gene-tnca/gene-LOC122865952	3	LOC122865952/snai2/tnca	0	-	3
BP	GO:0098609	cell-cell adhesion	13/430	232/11595	0.0911191531319771	0.713122373411076	gene-swap70a/gene-LOC122877917/gene-LOC122880019/gene-LOC122880009/gene-LOC122880002/gene-LOC122880010/gene-LOC122879996/gene-LOC122880004/gene-LOC122880007/gene-cdhr2/gene-clstn3/gene-pcdh15a/gene-pdzph1	13	cdhr2/clstn3/LOC122877917/LOC122879996/LOC122880002/LOC122880004/LOC122880007/LOC122880009/LOC122880010/LOC122880019/pcdh15a/pdzph1/swap70a	11	gene-cdhr2/gene-clstn3/gene-LOC122877917/gene-LOC122879996/gene-LOC122880002/gene-LOC122880004/gene-LOC122880007/gene-LOC122880009/gene-LOC122880010/gene-LOC122880019/gene-pdzph1	2
BP	GO:0008285	negative regulation of cell population proliferation	8/430	125/11595	0.0930702477357282	0.713122373411076	gene-podn/gene-LOC122877917/gene-LOC122883012/gene-snai2/gene-irf1b/gene-LOC122865952/gene-LOC122869242/gene-tafa5a	8	irf1b/LOC122865952/LOC122869242/LOC122877917/LOC122883012/podn/snai2/tafa5a	5	gene-irf1b/gene-LOC122869242/gene-LOC122877917/gene-LOC122883012/gene-podn	3
BP	GO:0000096	sulfur amino acid metabolic process	2/430	14/11595	0.093081236108393	0.713122373411076	gene-LOC122876938/gene-cbsa	2	cbsa/LOC122876938	2	gene-cbsa/gene-LOC122876938	0
BP	GO:0000302	response to reactive oxygen species	2/430	14/11595	0.093081236108393	0.713122373411076	gene-LOC122877917/gene-cbx8a	2	cbx8a/LOC122877917	1	gene-LOC122877917	1
BP	GO:0002761	regulation of myeloid leukocyte differentiation	2/430	14/11595	0.093081236108393	0.713122373411076	gene-zbtb46/gene-lrrc17	2	lrrc17/zbtb46	0	-	2
BP	GO:0008630	intrinsic apoptotic signaling pathway in response to DNA damage	2/430	14/11595	0.093081236108393	0.713122373411076	gene-LOC122881737/gene-snai2	2	LOC122881737/snai2	0	-	2
BP	GO:0018108	peptidyl-tyrosine phosphorylation	2/430	14/11595	0.093081236108393	0.713122373411076	gene-dok7b/gene-LOC122869123	2	dok7b/LOC122869123	1	gene-LOC122869123	1
BP	GO:0046890	regulation of lipid biosynthetic process	2/430	14/11595	0.093081236108393	0.713122373411076	gene-ddit3/gene-snai2	2	ddit3/snai2	1	gene-ddit3	1
BP	GO:0012501	programmed cell death	21/430	416/11595	0.094022614223491	0.716482488066709	gene-uacab/gene-ddit3/gene-LOC122875409/gene-LOC122877908/gene-ndnf/gene-LOC122877917/gene-tnfaip8l2b/gene-LOC122881737/gene-osgin2/gene-si:ch211-112c15.8/gene-LOC122883012/gene-snai2/gene-angptl4/gene-ripk2/gene-irf1b/gene-LOC122861357/gene-grhl2b/gene-LOC122865536/gene-LOC122865952/gene-LOC122868820/gene-phlda1	21	angptl4/ddit3/grhl2b/irf1b/LOC122861357/LOC122865536/LOC122865952/LOC122868820/LOC122875409/LOC122877908/LOC122877917/LOC122881737/LOC122883012/ndnf/osgin2/phlda1/ripk2/si:ch211-112c15.8/snai2/tnfaip8l2b/uacab	12	gene-ddit3/gene-grhl2b/gene-irf1b/gene-LOC122861357/gene-LOC122865536/gene-LOC122875409/gene-LOC122877908/gene-LOC122877917/gene-LOC122883012/gene-osgin2/gene-ripk2/gene-si:ch211-112c15.8	9
BP	GO:0006520	cellular amino acid metabolic process	10/430	168/11595	0.0951099964643158	0.720893970780878	gene-hal/gene-LOC122876127/gene-LOC122876938/gene-psat1/gene-ddah1/gene-ddc/gene-arg2/gene-LOC122866314/gene-enosf1/gene-cbsa	10	arg2/cbsa/ddah1/ddc/enosf1/hal/LOC122866314/LOC122876127/LOC122876938/psat1	9	gene-arg2/gene-cbsa/gene-ddc/gene-enosf1/gene-hal/gene-LOC122866314/gene-LOC122876127/gene-LOC122876938/gene-psat1	1
BP	GO:0042742	defense response to bacterium	4/430	47/11595	0.095613305598306	0.720893970780878	gene-pglyrp5/gene-LOC122881737/gene-LOC122881776/gene-LOC122881039	4	LOC122881039/LOC122881737/LOC122881776/pglyrp5	1	gene-LOC122881776	3
BP	GO:0031589	cell-substrate adhesion	5/430	66/11595	0.0975260039072512	0.72659898512126	gene-lamb3/gene-LOC122872091/gene-parvb/gene-ndnf/gene-si:ch211-278a6.1	5	lamb3/LOC122872091/ndnf/parvb/si:ch211-278a6.1	3	gene-lamb3/gene-parvb/gene-si:ch211-278a6.1	2
BP	GO:0055072	iron ion homeostasis	3/430	30/11595	0.0984095467567742	0.72659898512126	gene-LOC122881776/gene-LOC122881039/gene-LOC122868396	3	LOC122868396/LOC122881039/LOC122881776	2	gene-LOC122868396/gene-LOC122881776	1
BP	GO:0090630	activation of GTPase activity	3/430	30/11595	0.0984095467567742	0.72659898512126	gene-rundc1/gene-tbc1d14/gene-tbc1d30	3	rundc1/tbc1d14/tbc1d30	3	gene-rundc1/gene-tbc1d14/gene-tbc1d30	0
BP	GO:1902275	regulation of chromatin organization	3/430	30/11595	0.0984095467567742	0.72659898512126	gene-znf703/gene-snai2/gene-gfi1aa	3	gfi1aa/snai2/znf703	1	gene-gfi1aa	2
BP	GO:1901652	response to peptide	4/430	48/11595	0.101420473434713	0.731834468624181	gene-LOC122864683/gene-LOC122877917/gene-pid1/gene-si:ch73-335l21.1	4	LOC122864683/LOC122877917/pid1/si:ch73-335l21.1	2	gene-LOC122864683/gene-LOC122877917	2
BP	GO:0002274	myeloid leukocyte activation	2/430	15/11595	0.104858793506103	0.731834468624181	gene-LOC122873767/gene-ndrg1a	2	LOC122873767/ndrg1a	2	gene-LOC122873767/gene-ndrg1a	0
BP	GO:0009147	pyrimidine nucleoside triphosphate metabolic process	2/430	15/11595	0.104858793506103	0.731834468624181	gene-dut/gene-cmpk2	2	cmpk2/dut	1	gene-cmpk2	1
BP	GO:0010594	regulation of endothelial cell migration	2/430	15/11595	0.104858793506103	0.731834468624181	gene-LOC122877917/gene-snai2	2	LOC122877917/snai2	1	gene-LOC122877917	1
BP	GO:0046189	phenol-containing compound biosynthetic process	2/430	15/11595	0.104858793506103	0.731834468624181	gene-tph2/gene-ddc	2	ddc/tph2	1	gene-ddc	1
BP	GO:1902106	negative regulation of leukocyte differentiation	2/430	15/11595	0.104858793506103	0.731834468624181	gene-zbtb46/gene-lrrc17	2	lrrc17/zbtb46	0	-	2
BP	GO:1903707	negative regulation of hemopoiesis	2/430	15/11595	0.104858793506103	0.731834468624181	gene-zbtb46/gene-lrrc17	2	lrrc17/zbtb46	0	-	2
BP	GO:2000045	regulation of G1/S transition of mitotic cell cycle	2/430	15/11595	0.104858793506103	0.731834468624181	gene-LOC122877917/gene-LOC122865952	2	LOC122865952/LOC122877917	1	gene-LOC122877917	1
BP	GO:2001252	positive regulation of chromosome organization	2/430	15/11595	0.104858793506103	0.731834468624181	gene-znf703/gene-snai2	2	snai2/znf703	0	-	2
BP	GO:0044283	small molecule biosynthetic process	13/430	238/11595	0.105571576771559	0.731834468624181	gene-dut/gene-LOC122872164/gene-fbp2/gene-LOC122876938/gene-psat1/gene-pde4ba/gene-itpkcb/gene-elovl5/gene-snai2/gene-acaca/gene-pck2/gene-LOC122871599/gene-cbsa	13	acaca/cbsa/dut/elovl5/fbp2/itpkcb/LOC122871599/LOC122872164/LOC122876938/pck2/pde4ba/psat1/snai2	9	gene-acaca/gene-cbsa/gene-elovl5/gene-fbp2/gene-LOC122871599/gene-LOC122872164/gene-LOC122876938/gene-pck2/gene-psat1	4
BP	GO:0030177	positive regulation of Wnt signaling pathway	3/430	31/11595	0.106104860703304	0.731834468624181	gene-tmem198a/gene-bambia/gene-caprin2	3	bambia/caprin2/tmem198a	2	gene-caprin2/gene-tmem198a	1
BP	GO:0099536	synaptic signaling	8/430	129/11595	0.10660781396028	0.731834468624181	gene-slc12a5a/gene-nsmfb/gene-apba1a/gene-nlgn1/gene-LOC122881246/gene-dlgap2a/gene-LOC122869123/gene-LOC122871213	8	apba1a/dlgap2a/LOC122869123/LOC122871213/LOC122881246/nlgn1/nsmfb/slc12a5a	6	gene-apba1a/gene-dlgap2a/gene-LOC122869123/gene-nlgn1/gene-nsmfb/gene-slc12a5a	2
BP	GO:0045930	negative regulation of mitotic cell cycle	4/430	49/11595	0.107386260889687	0.731834468624181	gene-LOC122877917/gene-LOC122887176/gene-id2a/gene-LOC122865952	4	id2a/LOC122865952/LOC122877917/LOC122887176	1	gene-LOC122877917	3
BP	GO:0120035	regulation of plasma membrane bounded cell projection organization	6/430	88/11595	0.108078190200148	0.731834468624181	gene-vdac3/gene-ndnf/gene-LOC122877917/gene-omgb/gene-pard6gb/gene-si:ch211-278a6.1	6	LOC122877917/ndnf/omgb/pard6gb/si:ch211-278a6.1/vdac3	4	gene-LOC122877917/gene-omgb/gene-si:ch211-278a6.1/gene-vdac3	2
BP	GO:0045596	negative regulation of cell differentiation	5/430	69/11595	0.112414192528274	0.731834468624181	gene-zbtb46/gene-snai2/gene-nfkbiaa/gene-nog2/gene-lrrc17	5	lrrc17/nfkbiaa/nog2/snai2/zbtb46	1	gene-nfkbiaa	4
BP	GO:0051216	cartilage development	5/430	69/11595	0.112414192528274	0.731834468624181	gene-skib/gene-LOC122881519/gene-snai2/gene-tgfb3/gene-nog2	5	LOC122881519/nog2/skib/snai2/tgfb3	1	gene-LOC122881519	4
BP	GO:0007507	heart development	10/430	174/11595	0.112893263779916	0.731834468624181	gene-skib/gene-lrrc39/gene-apln/gene-cadm4/gene-snai2/gene-pard6gb/gene-pdzph1/gene-si:ch211-198m17.1/gene-mrtfbb/gene-xirp2a	10	apln/cadm4/lrrc39/mrtfbb/pard6gb/pdzph1/si:ch211-198m17.1/skib/snai2/xirp2a	5	gene-apln/gene-cadm4/gene-lrrc39/gene-pdzph1/gene-xirp2a	5
BP	GO:0090092	regulation of transmembrane receptor protein serine/threonine kinase signaling pathway	4/430	50/11595	0.113506653173984	0.731834468624181	gene-LOC122881519/gene-bambia/gene-nog2/gene-LOC122871826	4	bambia/LOC122871826/LOC122881519/nog2	1	gene-LOC122881519	3
BP	GO:0051258	protein polymerization	8/430	131/11595	0.113763621378868	0.731834468624181	gene-pstpip1b/gene-LOC122885147/gene-LOC122872091/gene-fmn2a/gene-LOC122861414/gene-fmn1/gene-LOC122867164/gene-eps8a	8	eps8a/fmn1/fmn2a/LOC122861414/LOC122867164/LOC122872091/LOC122885147/pstpip1b	5	gene-eps8a/gene-fmn1/gene-LOC122861414/gene-LOC122885147/gene-pstpip1b	3
BP	GO:0015748	organophosphate ester transport	3/430	32/11595	0.11402714047196	0.731834468624181	gene-atp8b4/gene-LOC122876099/gene-LOC122883087	3	atp8b4/LOC122876099/LOC122883087	3	gene-atp8b4/gene-LOC122876099/gene-LOC122883087	0
BP	GO:0045444	fat cell differentiation	3/430	32/11595	0.11402714047196	0.731834468624181	gene-lamb3/gene-LOC122877917/gene-snai2	3	lamb3/LOC122877917/snai2	2	gene-lamb3/gene-LOC122877917	1
BP	GO:0010632	regulation of epithelial cell migration	2/430	16/11595	0.117011210243636	0.731834468624181	gene-LOC122877917/gene-snai2	2	LOC122877917/snai2	1	gene-LOC122877917	1
BP	GO:0018212	peptidyl-tyrosine modification	2/430	16/11595	0.117011210243636	0.731834468624181	gene-dok7b/gene-LOC122869123	2	dok7b/LOC122869123	1	gene-LOC122869123	1
BP	GO:0030216	keratinocyte differentiation	2/430	16/11595	0.117011210243636	0.731834468624181	gene-LOC122882909/gene-LOC122882907	2	LOC122882907/LOC122882909	2	gene-LOC122882907/gene-LOC122882909	0
BP	GO:0050770	regulation of axonogenesis	2/430	16/11595	0.117011210243636	0.731834468624181	gene-omgb/gene-pard6gb	2	omgb/pard6gb	1	gene-omgb	1
BP	GO:0050920	regulation of chemotaxis	2/430	16/11595	0.117011210243636	0.731834468624181	gene-swap70a/gene-snai2	2	snai2/swap70a	0	-	2
BP	GO:0061318	renal filtration cell differentiation	2/430	16/11595	0.117011210243636	0.731834468624181	gene-LOC122870658/gene-LOC122865952	2	LOC122865952/LOC122870658	1	gene-LOC122870658	1
BP	GO:0072010	glomerular epithelium development	2/430	16/11595	0.117011210243636	0.731834468624181	gene-LOC122870658/gene-LOC122865952	2	LOC122865952/LOC122870658	1	gene-LOC122870658	1
BP	GO:0072112	glomerular visceral epithelial cell differentiation	2/430	16/11595	0.117011210243636	0.731834468624181	gene-LOC122870658/gene-LOC122865952	2	LOC122865952/LOC122870658	1	gene-LOC122870658	1
BP	GO:0072311	glomerular epithelial cell differentiation	2/430	16/11595	0.117011210243636	0.731834468624181	gene-LOC122870658/gene-LOC122865952	2	LOC122865952/LOC122870658	1	gene-LOC122870658	1
BP	GO:0097529	myeloid leukocyte migration	2/430	16/11595	0.117011210243636	0.731834468624181	gene-swap70a/gene-LOC122873767	2	LOC122873767/swap70a	1	gene-LOC122873767	1
BP	GO:1901654	response to ketone	2/430	16/11595	0.117011210243636	0.731834468624181	gene-LOC122877917/gene-tnca	2	LOC122877917/tnca	1	gene-LOC122877917	1
BP	GO:2000027	regulation of animal organ morphogenesis	2/430	16/11595	0.117011210243636	0.731834468624181	gene-snai2/gene-sapcd1	2	sapcd1/snai2	1	gene-sapcd1	1
BP	GO:2000116	regulation of cysteine-type endopeptidase activity	2/430	16/11595	0.117011210243636	0.731834468624181	gene-LOC122877917/gene-LOC122881737	2	LOC122877917/LOC122881737	1	gene-LOC122877917	1
BP	GO:0032535	regulation of cellular component size	8/430	132/11595	0.117436851682628	0.731834468624181	gene-swap70a/gene-LOC122885147/gene-omgb/gene-fmn2a/gene-LOC122861414/gene-fmn1/gene-pard6gb/gene-eps8a	8	eps8a/fmn1/fmn2a/LOC122861414/LOC122885147/omgb/pard6gb/swap70a	5	gene-eps8a/gene-fmn1/gene-LOC122861414/gene-LOC122885147/gene-omgb	3
BP	GO:0055065	metal ion homeostasis	5/430	70/11595	0.117607083028026	0.731834468624181	gene-swap70a/gene-LOC122881776/gene-LOC122881039/gene-slc31a2/gene-LOC122868396	5	LOC122868396/LOC122881039/LOC122881776/slc31a2/swap70a	3	gene-LOC122868396/gene-LOC122881776/gene-slc31a2	2
BP	GO:0001889	liver development	4/430	51/11595	0.119777456764845	0.742099460390885	gene-cebpa/gene-apln/gene-id2a/gene-mrtfbb	4	apln/cebpa/id2a/mrtfbb	2	gene-apln/gene-cebpa	2
BP	GO:0002682	regulation of immune system process	12/430	221/11595	0.120344164511799	0.742382833027334	gene-swap70a/gene-LOC122878212/gene-LOC122881975/gene-LOC122881976/gene-zbtb46/gene-irf1b/gene-LOC122868841/gene-LOC122869242/gene-LOC122870587/gene-LOC122869735/gene-LOC122869738/gene-lrrc17	12	irf1b/LOC122868841/LOC122869242/LOC122869735/LOC122869738/LOC122870587/LOC122878212/LOC122881975/LOC122881976/lrrc17/swap70a/zbtb46	9	gene-irf1b/gene-LOC122868841/gene-LOC122869242/gene-LOC122869735/gene-LOC122869738/gene-LOC122870587/gene-LOC122878212/gene-LOC122881975/gene-LOC122881976	3
BP	GO:0030203	glycosaminoglycan metabolic process	3/430	33/11595	0.122165513558876	0.744870437061122	gene-ndnf/gene-pglyrp5/gene-gnsb	3	gnsb/ndnf/pglyrp5	1	gene-gnsb	2
BP	GO:0090132	epithelium migration	3/430	33/11595	0.122165513558876	0.744870437061122	gene-LOC122877917/gene-apln/gene-snai2	3	apln/LOC122877917/snai2	2	gene-apln/gene-LOC122877917	1
BP	GO:0002252	immune effector process	7/430	112/11595	0.122315566506879	0.744870437061122	gene-swap70a/gene-LOC122878212/gene-ifih1/gene-rsad2/gene-ch25h/gene-LOC122868841/gene-dhx58	7	ch25h/dhx58/ifih1/LOC122868841/LOC122878212/rsad2/swap70a	6	gene-ch25h/gene-dhx58/gene-ifih1/gene-LOC122868841/gene-LOC122878212/gene-rsad2	1
BP	GO:0006935	chemotaxis	8/430	134/11595	0.124971482032671	0.757805795304495	gene-swap70a/gene-LOC122873767/gene-myot/gene-LOC122881975/gene-LOC122881976/gene-LOC122885641/gene-snai2/gene-LOC122888546	8	LOC122873767/LOC122881975/LOC122881976/LOC122885641/LOC122888546/myot/snai2/swap70a	5	gene-LOC122873767/gene-LOC122881975/gene-LOC122881976/gene-LOC122885641/gene-myot	3
BP	GO:0097190	apoptotic signaling pathway	4/430	52/11595	0.12619431564984	0.759382184862799	gene-uacab/gene-ddit3/gene-LOC122881737/gene-snai2	4	ddit3/LOC122881737/snai2/uacab	1	gene-ddit3	3
BP	GO:0046395	carboxylic acid catabolic process	5/430	72/11595	0.128325483965764	0.759382184862799	gene-hal/gene-ddah1/gene-lpin1b/gene-enosf1/gene-aldh1l2	5	aldh1l2/ddah1/enosf1/hal/lpin1b	4	gene-aldh1l2/gene-enosf1/gene-hal/gene-lpin1b	1
BP	GO:1901699	cellular response to nitrogen compound	5/430	72/11595	0.128325483965764	0.759382184862799	gene-LOC122864683/gene-LOC122878212/gene-LOC122877917/gene-pid1/gene-si:ch73-335l21.1	5	LOC122864683/LOC122877917/LOC122878212/pid1/si:ch73-335l21.1	3	gene-LOC122864683/gene-LOC122877917/gene-LOC122878212	2
BP	GO:0009069	serine family amino acid metabolic process	2/430	17/11595	0.129494646260814	0.759382184862799	gene-psat1/gene-cbsa	2	cbsa/psat1	2	gene-cbsa/gene-psat1	0
BP	GO:0031532	actin cytoskeleton reorganization	2/430	17/11595	0.129494646260814	0.759382184862799	gene-LOC122872091/gene-parvb	2	LOC122872091/parvb	1	gene-parvb	1
BP	GO:0052548	regulation of endopeptidase activity	2/430	17/11595	0.129494646260814	0.759382184862799	gene-LOC122877917/gene-LOC122881737	2	LOC122877917/LOC122881737	1	gene-LOC122877917	1
BP	GO:0060218	hematopoietic stem cell differentiation	2/430	17/11595	0.129494646260814	0.759382184862799	gene-tph2/gene-tgfb3	2	tgfb3/tph2	0	-	2
BP	GO:0072593	reactive oxygen species metabolic process	2/430	17/11595	0.129494646260814	0.759382184862799	gene-ddah1/gene-LOC122877917	2	ddah1/LOC122877917	1	gene-LOC122877917	1
BP	GO:0006022	aminoglycan metabolic process	3/430	34/11595	0.130508991031387	0.759729462588246	gene-ndnf/gene-pglyrp5/gene-gnsb	3	gnsb/ndnf/pglyrp5	1	gene-gnsb	2
BP	GO:0031344	regulation of cell projection organization	6/430	93/11595	0.131056258317092	0.759729462588246	gene-vdac3/gene-ndnf/gene-LOC122877917/gene-omgb/gene-pard6gb/gene-si:ch211-278a6.1	6	LOC122877917/ndnf/omgb/pard6gb/si:ch211-278a6.1/vdac3	4	gene-LOC122877917/gene-omgb/gene-si:ch211-278a6.1/gene-vdac3	2
BP	GO:0090066	regulation of anatomical structure size	10/430	180/11595	0.132425951562587	0.759729462588246	gene-swap70a/gene-LOC122885147/gene-omgb/gene-fmn2a/gene-LOC122861414/gene-LOC122863516/gene-fmn1/gene-edn1/gene-pard6gb/gene-eps8a	10	edn1/eps8a/fmn1/fmn2a/LOC122861414/LOC122863516/LOC122885147/omgb/pard6gb/swap70a	5	gene-eps8a/gene-fmn1/gene-LOC122861414/gene-LOC122885147/gene-omgb	5
BP	GO:0008544	epidermis development	4/430	53/11595	0.132752727146999	0.759729462588246	gene-evpla/gene-LOC122877917/gene-LOC122882909/gene-LOC122882907	4	evpla/LOC122877917/LOC122882907/LOC122882909	4	gene-evpla/gene-LOC122877917/gene-LOC122882907/gene-LOC122882909	0
BP	GO:0044272	sulfur compound biosynthetic process	4/430	53/11595	0.132752727146999	0.759729462588246	gene-LOC122876938/gene-elovl5/gene-acaca/gene-cbsa	4	acaca/cbsa/elovl5/LOC122876938	4	gene-acaca/gene-cbsa/gene-elovl5/gene-LOC122876938	0
BP	GO:1903522	regulation of blood circulation	4/430	53/11595	0.132752727146999	0.759729462588246	gene-parvb/gene-apln/gene-edn1/gene-pdzph1	4	apln/edn1/parvb/pdzph1	3	gene-apln/gene-parvb/gene-pdzph1	1
BP	GO:0008219	cell death	21/430	437/11595	0.135098057063609	0.770058925262573	gene-uacab/gene-ddit3/gene-LOC122875409/gene-LOC122877908/gene-ndnf/gene-LOC122877917/gene-tnfaip8l2b/gene-LOC122881737/gene-osgin2/gene-si:ch211-112c15.8/gene-LOC122883012/gene-snai2/gene-angptl4/gene-ripk2/gene-irf1b/gene-LOC122861357/gene-grhl2b/gene-LOC122865536/gene-LOC122865952/gene-LOC122868820/gene-phlda1	21	angptl4/ddit3/grhl2b/irf1b/LOC122861357/LOC122865536/LOC122865952/LOC122868820/LOC122875409/LOC122877908/LOC122877917/LOC122881737/LOC122883012/ndnf/osgin2/phlda1/ripk2/si:ch211-112c15.8/snai2/tnfaip8l2b/uacab	12	gene-ddit3/gene-grhl2b/gene-irf1b/gene-LOC122861357/gene-LOC122865536/gene-LOC122875409/gene-LOC122877908/gene-LOC122877917/gene-LOC122883012/gene-osgin2/gene-ripk2/gene-si:ch211-112c15.8	9
BP	GO:0030336	negative regulation of cell migration	3/430	35/11595	0.13904651335343	0.78316712066655	gene-podn/gene-LOC122877917/gene-tafa5a	3	LOC122877917/podn/tafa5a	2	gene-LOC122877917/gene-podn	1
BP	GO:0071375	cellular response to peptide hormone stimulus	3/430	35/11595	0.13904651335343	0.78316712066655	gene-LOC122864683/gene-pid1/gene-si:ch73-335l21.1	3	LOC122864683/pid1/si:ch73-335l21.1	1	gene-LOC122864683	2
BP	GO:0090130	tissue migration	3/430	35/11595	0.13904651335343	0.78316712066655	gene-LOC122877917/gene-apln/gene-snai2	3	apln/LOC122877917/snai2	2	gene-apln/gene-LOC122877917	1
BP	GO:0042330	taxis	8/430	138/11595	0.140777152752954	0.785782470588784	gene-swap70a/gene-LOC122873767/gene-myot/gene-LOC122881975/gene-LOC122881976/gene-LOC122885641/gene-snai2/gene-LOC122888546	8	LOC122873767/LOC122881975/LOC122881976/LOC122885641/LOC122888546/myot/snai2/swap70a	5	gene-LOC122873767/gene-LOC122881975/gene-LOC122881976/gene-LOC122885641/gene-myot	3
BP	GO:0030111	regulation of Wnt signaling pathway	6/430	95/11595	0.140853464390252	0.785782470588784	gene-plpp3/gene-LOC122884881/gene-tmem198a/gene-snai2/gene-bambia/gene-caprin2	6	bambia/caprin2/LOC122884881/plpp3/snai2/tmem198a	2	gene-caprin2/gene-tmem198a	4
BP	GO:0002440	production of molecular mediator of immune response	2/430	18/11595	0.142267984148706	0.785782470588784	gene-swap70a/gene-LOC122868820	2	LOC122868820/swap70a	0	-	2
BP	GO:0006029	proteoglycan metabolic process	2/430	18/11595	0.142267984148706	0.785782470588784	gene-ndnf/gene-LOC122863823	2	LOC122863823/ndnf	0	-	2
BP	GO:0052547	regulation of peptidase activity	2/430	18/11595	0.142267984148706	0.785782470588784	gene-LOC122877917/gene-LOC122881737	2	LOC122877917/LOC122881737	1	gene-LOC122877917	1
BP	GO:0071345	cellular response to cytokine stimulus	5/430	75/11595	0.145199559312663	0.798877884249208	gene-cxcl12b/gene-LOC122878212/gene-LOC122877917/gene-csf1ra/gene-LOC122870595	5	csf1ra/cxcl12b/LOC122870595/LOC122877917/LOC122878212	3	gene-csf1ra/gene-LOC122877917/gene-LOC122878212	2
BP	GO:0016055	Wnt signaling pathway	10/430	184/11595	0.146389775191983	0.800638645808618	gene-lef1/gene-plpp3/gene-LOC122877917/gene-LOC122884881/gene-wnt6b/gene-tmem198a/gene-snai2/gene-bambia/gene-wnt5b/gene-caprin2	10	bambia/caprin2/lef1/LOC122877917/LOC122884881/plpp3/snai2/tmem198a/wnt5b/wnt6b	5	gene-caprin2/gene-lef1/gene-LOC122877917/gene-tmem198a/gene-wnt6b	5
BP	GO:0007623	circadian rhythm	3/430	36/11595	0.147766992173801	0.800638645808618	gene-LOC122875367/gene-otx5/gene-camk1gb	3	camk1gb/LOC122875367/otx5	2	gene-camk1gb/gene-otx5	1
BP	GO:0051271	negative regulation of cellular component movement	3/430	36/11595	0.147766992173801	0.800638645808618	gene-podn/gene-LOC122877917/gene-tafa5a	3	LOC122877917/podn/tafa5a	2	gene-LOC122877917/gene-podn	1
BP	GO:2000146	negative regulation of cell motility	3/430	36/11595	0.147766992173801	0.800638645808618	gene-podn/gene-LOC122877917/gene-tafa5a	3	LOC122877917/podn/tafa5a	2	gene-LOC122877917/gene-podn	1
BP	GO:0198738	cell-cell signaling by wnt	10/430	185/11595	0.149995068783248	0.808713398255832	gene-lef1/gene-plpp3/gene-LOC122877917/gene-LOC122884881/gene-wnt6b/gene-tmem198a/gene-snai2/gene-bambia/gene-wnt5b/gene-caprin2	10	bambia/caprin2/lef1/LOC122877917/LOC122884881/plpp3/snai2/tmem198a/wnt5b/wnt6b	5	gene-caprin2/gene-lef1/gene-LOC122877917/gene-tmem198a/gene-wnt6b	5
BP	GO:0000902	cell morphogenesis	13/430	254/11595	0.150392316166874	0.808713398255832	gene-lamb3/gene-LOC122872091/gene-amotl2a/gene-omgb/gene-myot/gene-LOC122888546/gene-fryb/gene-pard6gb/gene-cap2/gene-LOC122867164/gene-LOC122869123/gene-si:ch211-278a6.1/gene-LOC122869492	13	amotl2a/cap2/fryb/lamb3/LOC122867164/LOC122869123/LOC122869492/LOC122872091/LOC122888546/myot/omgb/pard6gb/si:ch211-278a6.1	6	gene-lamb3/gene-LOC122869123/gene-LOC122869492/gene-myot/gene-omgb/gene-si:ch211-278a6.1	7
BP	GO:0016054	organic acid catabolic process	5/430	76/11595	0.151026644699843	0.809071310892016	gene-hal/gene-ddah1/gene-lpin1b/gene-enosf1/gene-aldh1l2	5	aldh1l2/ddah1/enosf1/hal/lpin1b	4	gene-aldh1l2/gene-enosf1/gene-hal/gene-lpin1b	1
BP	GO:0051093	negative regulation of developmental process	7/430	119/11595	0.153168808967152	0.817473980442664	gene-LOC122877917/gene-zbtb46/gene-snai2/gene-nfkbiaa/gene-nog2/gene-lrrc17/gene-tafa5a	7	LOC122877917/lrrc17/nfkbiaa/nog2/snai2/tafa5a/zbtb46	2	gene-LOC122877917/gene-nfkbiaa	5
BP	GO:0030282	bone mineralization	2/430	19/11595	0.155292688273101	0.817727367718997	gene-pth4/gene-pthlha	2	pth4/pthlha	1	gene-pth4	1
BP	GO:0051781	positive regulation of cell division	2/430	19/11595	0.155292688273101	0.817727367718997	gene-LOC122888753/gene-tgfb3	2	LOC122888753/tgfb3	1	gene-LOC122888753	1
BP	GO:0002684	positive regulation of immune system process	6/430	98/11595	0.156161605783797	0.817727367718997	gene-swap70a/gene-zbtb46/gene-LOC122868841/gene-LOC122870587/gene-LOC122869735/gene-LOC122869738	6	LOC122868841/LOC122869735/LOC122869738/LOC122870587/swap70a/zbtb46	4	gene-LOC122868841/gene-LOC122869735/gene-LOC122869738/gene-LOC122870587	2
BP	GO:0008016	regulation of heart contraction	3/430	37/11595	0.156659348341955	0.817727367718997	gene-parvb/gene-apln/gene-pdzph1	3	apln/parvb/pdzph1	3	gene-apln/gene-parvb/gene-pdzph1	0
BP	GO:0009124	nucleoside monophosphate biosynthetic process	3/430	37/11595	0.156659348341955	0.817727367718997	gene-dut/gene-ampd3a/gene-adss1	3	adss1/ampd3a/dut	1	gene-adss1	2
BP	GO:0048738	cardiac muscle tissue development	3/430	37/11595	0.156659348341955	0.817727367718997	gene-lrrc39/gene-pdzph1/gene-mrtfbb	3	lrrc39/mrtfbb/pdzph1	2	gene-lrrc39/gene-pdzph1	1
BP	GO:0001501	skeletal system development	8/430	142/11595	0.157528508873351	0.819263230454471	gene-skib/gene-LOC122881519/gene-snai2/gene-tgfb3/gene-nog2/gene-LOC122869123/gene-pthlha/gene-lrrc17	8	LOC122869123/LOC122881519/lrrc17/nog2/pthlha/skib/snai2/tgfb3	2	gene-LOC122869123/gene-LOC122881519	6
BP	GO:0031099	regeneration	4/430	57/11595	0.160307559537661	0.827427947871307	gene-ccn1/gene-LOC122877917/gene-omgb/gene-tnca	4	ccn1/LOC122877917/omgb/tnca	2	gene-LOC122877917/gene-omgb	2
BP	GO:0030097	hemopoiesis	11/430	211/11595	0.161261204718813	0.827427947871307	gene-cebpa/gene-tph2/gene-cfap251/gene-LOC122877917/gene-zbtb46/gene-gfi1aa/gene-tgfb3/gene-nfkbiaa/gene-flvcr1/gene-LOC122869123/gene-lrrc17	11	cebpa/cfap251/flvcr1/gfi1aa/LOC122869123/LOC122877917/lrrc17/nfkbiaa/tgfb3/tph2/zbtb46	7	gene-cebpa/gene-cfap251/gene-flvcr1/gene-gfi1aa/gene-LOC122869123/gene-LOC122877917/gene-nfkbiaa	4
BP	GO:0008064	regulation of actin polymerization or depolymerization	6/430	99/11595	0.161421031233841	0.827427947871307	gene-swap70a/gene-LOC122885147/gene-fmn2a/gene-LOC122861414/gene-fmn1/gene-eps8a	6	eps8a/fmn1/fmn2a/LOC122861414/LOC122885147/swap70a	4	gene-eps8a/gene-fmn1/gene-LOC122861414/gene-LOC122885147	2
BP	GO:0030832	regulation of actin filament length	6/430	99/11595	0.161421031233841	0.827427947871307	gene-swap70a/gene-LOC122885147/gene-fmn2a/gene-LOC122861414/gene-fmn1/gene-eps8a	6	eps8a/fmn1/fmn2a/LOC122861414/LOC122885147/swap70a	4	gene-eps8a/gene-fmn1/gene-LOC122861414/gene-LOC122885147	2
BP	GO:0034097	response to cytokine	5/430	78/11595	0.162968429038944	0.828134674323248	gene-cxcl12b/gene-LOC122878212/gene-LOC122877917/gene-csf1ra/gene-LOC122870595	5	csf1ra/cxcl12b/LOC122870595/LOC122877917/LOC122878212	3	gene-csf1ra/gene-LOC122877917/gene-LOC122878212	2
BP	GO:0097435	supramolecular fiber organization	14/430	282/11595	0.164530421655036	0.828134674323248	gene-swap70a/gene-pstpip1b/gene-LOC122885147/gene-LOC122872091/gene-LOC122873669/gene-lrrc39/gene-LOC122880325/gene-fmn2a/gene-LOC122861414/gene-fmn1/gene-LOC122867164/gene-LOC122869123/gene-LOC122871423/gene-eps8a	14	eps8a/fmn1/fmn2a/LOC122861414/LOC122867164/LOC122869123/LOC122871423/LOC122872091/LOC122873669/LOC122880325/LOC122885147/lrrc39/pstpip1b/swap70a	9	gene-eps8a/gene-fmn1/gene-LOC122861414/gene-LOC122869123/gene-LOC122871423/gene-LOC122880325/gene-LOC122885147/gene-lrrc39/gene-pstpip1b	5
BP	GO:0048534	hematopoietic or lymphoid organ development	11/430	212/11595	0.164822966268935	0.828134674323248	gene-cebpa/gene-tph2/gene-cfap251/gene-LOC122877917/gene-zbtb46/gene-gfi1aa/gene-tgfb3/gene-nfkbiaa/gene-flvcr1/gene-LOC122869123/gene-lrrc17	11	cebpa/cfap251/flvcr1/gfi1aa/LOC122869123/LOC122877917/lrrc17/nfkbiaa/tgfb3/tph2/zbtb46	7	gene-cebpa/gene-cfap251/gene-flvcr1/gene-gfi1aa/gene-LOC122869123/gene-LOC122877917/gene-nfkbiaa	4
BP	GO:0008543	fibroblast growth factor receptor signaling pathway	3/430	38/11595	0.165712546400902	0.828134674323248	gene-fgf7/gene-LOC122880049/gene-LOC122888753	3	fgf7/LOC122880049/LOC122888753	2	gene-LOC122880049/gene-LOC122888753	1
BP	GO:0019882	antigen processing and presentation	2/430	20/11595	0.168532670564029	0.828134674323248	gene-wdfy4/gene-b2m	2	b2m/wdfy4	2	gene-b2m/gene-wdfy4	0
BP	GO:0021782	glial cell development	2/430	20/11595	0.168532670564029	0.828134674323248	gene-omgb/gene-ndrg1a	2	ndrg1a/omgb	2	gene-ndrg1a/gene-omgb	0
BP	GO:0030595	leukocyte chemotaxis	2/430	20/11595	0.168532670564029	0.828134674323248	gene-swap70a/gene-LOC122873767	2	LOC122873767/swap70a	1	gene-LOC122873767	1
BP	GO:0032963	collagen metabolic process	2/430	20/11595	0.168532670564029	0.828134674323248	gene-mmp9/gene-cbx8a	2	cbx8a/mmp9	1	gene-mmp9	1
BP	GO:0035305	negative regulation of dephosphorylation	2/430	20/11595	0.168532670564029	0.828134674323248	gene-swap70a/gene-zgc:92242	2	swap70a/zgc:92242	1	gene-zgc:92242	1
BP	GO:0042552	myelination	2/430	20/11595	0.168532670564029	0.828134674323248	gene-omgb/gene-ndrg1a	2	ndrg1a/omgb	2	gene-ndrg1a/gene-omgb	0
BP	GO:0048813	dendrite morphogenesis	2/430	20/11595	0.168532670564029	0.828134674323248	gene-LOC122869123/gene-si:ch211-278a6.1	2	LOC122869123/si:ch211-278a6.1	2	gene-LOC122869123/gene-si:ch211-278a6.1	0
BP	GO:1902806	regulation of cell cycle G1/S phase transition	2/430	20/11595	0.168532670564029	0.828134674323248	gene-LOC122877917/gene-LOC122865952	2	LOC122865952/LOC122877917	1	gene-LOC122877917	1
BP	GO:0009611	response to wounding	6/430	101/11595	0.172164444978117	0.834944303760913	gene-LOC122877917/gene-omgb/gene-p2ry8/gene-snai2/gene-tnca/gene-tafa5a	6	LOC122877917/omgb/p2ry8/snai2/tafa5a/tnca	3	gene-LOC122877917/gene-omgb/gene-p2ry8	3
BP	GO:0031175	neuron projection development	12/430	238/11595	0.174451530963065	0.834944303760913	gene-LOC122872091/gene-ndnf/gene-LOC122877917/gene-omgb/gene-myot/gene-LOC122888546/gene-pard6gb/gene-tnca/gene-LOC122867164/gene-LOC122869123/gene-si:ch211-278a6.1/gene-mrtfbb	12	LOC122867164/LOC122869123/LOC122872091/LOC122877917/LOC122888546/mrtfbb/myot/ndnf/omgb/pard6gb/si:ch211-278a6.1/tnca	5	gene-LOC122869123/gene-LOC122877917/gene-myot/gene-omgb/gene-si:ch211-278a6.1	7
BP	GO:0009913	epidermal cell differentiation	3/430	39/11595	0.174915625792543	0.834944303760913	gene-LOC122877917/gene-LOC122882909/gene-LOC122882907	3	LOC122877917/LOC122882907/LOC122882909	3	gene-LOC122877917/gene-LOC122882907/gene-LOC122882909	0
BP	GO:1901607	alpha-amino acid biosynthetic process	3/430	39/11595	0.174915625792543	0.834944303760913	gene-LOC122876938/gene-psat1/gene-cbsa	3	cbsa/LOC122876938/psat1	3	gene-cbsa/gene-LOC122876938/gene-psat1	0
BP	GO:0007389	pattern specification process	10/430	192/11595	0.176460708987276	0.834944303760913	gene-skib/gene-snai1a/gene-znf703/gene-amotl2a/gene-apln/gene-grhl2b/gene-LOC122869123/gene-caprin2/gene-rpgrb/gene-LOC122871826	10	amotl2a/apln/caprin2/grhl2b/LOC122869123/LOC122871826/rpgrb/skib/snai1a/znf703	4	gene-apln/gene-caprin2/gene-grhl2b/gene-LOC122869123	6
BP	GO:0007268	chemical synaptic transmission	7/430	124/11595	0.177202731774707	0.834944303760913	gene-slc12a5a/gene-nsmfb/gene-apba1a/gene-nlgn1/gene-LOC122881246/gene-dlgap2a/gene-LOC122871213	7	apba1a/dlgap2a/LOC122871213/LOC122881246/nlgn1/nsmfb/slc12a5a	5	gene-apba1a/gene-dlgap2a/gene-nlgn1/gene-nsmfb/gene-slc12a5a	2
BP	GO:0098916	anterograde trans-synaptic signaling	7/430	124/11595	0.177202731774707	0.834944303760913	gene-slc12a5a/gene-nsmfb/gene-apba1a/gene-nlgn1/gene-LOC122881246/gene-dlgap2a/gene-LOC122871213	7	apba1a/dlgap2a/LOC122871213/LOC122881246/nlgn1/nsmfb/slc12a5a	5	gene-apba1a/gene-dlgap2a/gene-nlgn1/gene-nsmfb/gene-slc12a5a	2
BP	GO:0099537	trans-synaptic signaling	7/430	124/11595	0.177202731774707	0.834944303760913	gene-slc12a5a/gene-nsmfb/gene-apba1a/gene-nlgn1/gene-LOC122881246/gene-dlgap2a/gene-LOC122871213	7	apba1a/dlgap2a/LOC122871213/LOC122881246/nlgn1/nsmfb/slc12a5a	5	gene-apba1a/gene-dlgap2a/gene-nlgn1/gene-nsmfb/gene-slc12a5a	2
BP	GO:0050808	synapse organization	5/430	81/11595	0.181557884874785	0.834944303760913	gene-pclob/gene-nlgn1/gene-cnksr1/gene-tnca/gene-si:ch211-278a6.1	5	cnksr1/nlgn1/pclob/si:ch211-278a6.1/tnca	3	gene-nlgn1/gene-pclob/gene-si:ch211-278a6.1	2
BP	GO:0001666	response to hypoxia	2/430	21/11595	0.181954162672428	0.834944303760913	gene-ddit3/gene-apln	2	apln/ddit3	2	gene-apln/gene-ddit3	0
BP	GO:0007272	ensheathment of neurons	2/430	21/11595	0.181954162672428	0.834944303760913	gene-omgb/gene-ndrg1a	2	ndrg1a/omgb	2	gene-ndrg1a/gene-omgb	0
BP	GO:0008366	axon ensheathment	2/430	21/11595	0.181954162672428	0.834944303760913	gene-omgb/gene-ndrg1a	2	ndrg1a/omgb	2	gene-ndrg1a/gene-omgb	0
BP	GO:0016525	negative regulation of angiogenesis	2/430	21/11595	0.181954162672428	0.834944303760913	gene-LOC122877917/gene-tafa5a	2	LOC122877917/tafa5a	1	gene-LOC122877917	1
BP	GO:0035272	exocrine system development	2/430	21/11595	0.181954162672428	0.834944303760913	gene-lnx2b/gene-snai2	2	lnx2b/snai2	0	-	2
BP	GO:0035850	epithelial cell differentiation involved in kidney development	2/430	21/11595	0.181954162672428	0.834944303760913	gene-LOC122870658/gene-LOC122865952	2	LOC122865952/LOC122870658	1	gene-LOC122870658	1
BP	GO:0036293	response to decreased oxygen levels	2/430	21/11595	0.181954162672428	0.834944303760913	gene-ddit3/gene-apln	2	apln/ddit3	2	gene-apln/gene-ddit3	0
BP	GO:0045637	regulation of myeloid cell differentiation	2/430	21/11595	0.181954162672428	0.834944303760913	gene-zbtb46/gene-lrrc17	2	lrrc17/zbtb46	0	-	2
BP	GO:0061005	cell differentiation involved in kidney development	2/430	21/11595	0.181954162672428	0.834944303760913	gene-LOC122870658/gene-LOC122865952	2	LOC122865952/LOC122870658	1	gene-LOC122870658	1
BP	GO:2000181	negative regulation of blood vessel morphogenesis	2/430	21/11595	0.181954162672428	0.834944303760913	gene-LOC122877917/gene-tafa5a	2	LOC122877917/tafa5a	1	gene-LOC122877917	1
BP	GO:0060047	heart contraction	4/430	60/11595	0.182222932259399	0.834944303760913	gene-parvb/gene-lrrc39/gene-apln/gene-pdzph1	4	apln/lrrc39/parvb/pdzph1	4	gene-apln/gene-lrrc39/gene-parvb/gene-pdzph1	0
BP	GO:1902905	positive regulation of supramolecular fiber organization	4/430	60/11595	0.182222932259399	0.834944303760913	gene-swap70a/gene-fmn2a/gene-LOC122861414/gene-fmn1	4	fmn1/fmn2a/LOC122861414/swap70a	2	gene-fmn1/gene-LOC122861414	2
BP	GO:0043066	negative regulation of apoptotic process	6/430	103/11595	0.183194971100307	0.836201477137098	gene-LOC122877908/gene-ndnf/gene-LOC122877917/gene-snai2/gene-angptl4/gene-LOC122868820	6	angptl4/LOC122868820/LOC122877908/LOC122877917/ndnf/snai2	2	gene-LOC122877908/gene-LOC122877917	4
BP	GO:0034404	nucleobase-containing small molecule biosynthetic process	3/430	40/11595	0.184257728997227	0.836201477137098	gene-dut/gene-LOC122872164/gene-pde4ba	3	dut/LOC122872164/pde4ba	1	gene-LOC122872164	2
BP	GO:0045010	actin nucleation	3/430	40/11595	0.184257728997227	0.836201477137098	gene-fmn2a/gene-LOC122861414/gene-fmn1	3	fmn1/fmn2a/LOC122861414	2	gene-fmn1/gene-LOC122861414	1
BP	GO:1905114	cell surface receptor signaling pathway involved in cell-cell signaling	10/430	195/11595	0.188431884402996	0.841764265094685	gene-lef1/gene-plpp3/gene-LOC122877917/gene-LOC122884881/gene-wnt6b/gene-tmem198a/gene-snai2/gene-bambia/gene-wnt5b/gene-caprin2	10	bambia/caprin2/lef1/LOC122877917/LOC122884881/plpp3/snai2/tmem198a/wnt5b/wnt6b	5	gene-caprin2/gene-lef1/gene-LOC122877917/gene-tmem198a/gene-wnt6b	5
BP	GO:0043069	negative regulation of programmed cell death	6/430	104/11595	0.188813128542794	0.841764265094685	gene-LOC122877908/gene-ndnf/gene-LOC122877917/gene-snai2/gene-angptl4/gene-LOC122868820	6	angptl4/LOC122868820/LOC122877908/LOC122877917/ndnf/snai2	2	gene-LOC122877908/gene-LOC122877917	4
BP	GO:0044282	small molecule catabolic process	6/430	104/11595	0.188813128542794	0.841764265094685	gene-hal/gene-ddah1/gene-lpin1b/gene-galt/gene-enosf1/gene-aldh1l2	6	aldh1l2/ddah1/enosf1/galt/hal/lpin1b	5	gene-aldh1l2/gene-enosf1/gene-galt/gene-hal/gene-lpin1b	1
BP	GO:0007018	microtubule-based movement	9/430	172/11595	0.189192583747553	0.841764265094685	gene-odad3/gene-kif21a/gene-dnah12/gene-LOC122886528/gene-kif1ab/gene-kif26bb/gene-LOC122863271/gene-LOC122870458/gene-rpgrb	9	dnah12/kif1ab/kif21a/kif26bb/LOC122863271/LOC122870458/LOC122886528/odad3/rpgrb	7	gene-dnah12/gene-kif1ab/gene-kif21a/gene-kif26bb/gene-LOC122863271/gene-LOC122870458/gene-LOC122886528	2
BP	GO:0003015	heart process	4/430	61/11595	0.189738914498314	0.841764265094685	gene-parvb/gene-lrrc39/gene-apln/gene-pdzph1	4	apln/lrrc39/parvb/pdzph1	4	gene-apln/gene-lrrc39/gene-parvb/gene-pdzph1	0
BP	GO:0051495	positive regulation of cytoskeleton organization	4/430	61/11595	0.189738914498314	0.841764265094685	gene-swap70a/gene-fmn2a/gene-LOC122861414/gene-fmn1	4	fmn1/fmn2a/LOC122861414/swap70a	2	gene-fmn1/gene-LOC122861414	2
BP	GO:0051130	positive regulation of cellular component organization	8/430	150/11595	0.193657418751712	0.841764265094685	gene-swap70a/gene-znf703/gene-ndnf/gene-fmn2a/gene-LOC122886528/gene-snai2/gene-LOC122861414/gene-fmn1	8	fmn1/fmn2a/LOC122861414/LOC122886528/ndnf/snai2/swap70a/znf703	3	gene-fmn1/gene-LOC122861414/gene-LOC122886528	5
BP	GO:0002244	hematopoietic progenitor cell differentiation	3/430	41/11595	0.19372812681651	0.841764265094685	gene-tph2/gene-tgfb3/gene-nfkbiaa	3	nfkbiaa/tgfb3/tph2	1	gene-nfkbiaa	2
BP	GO:0009123	nucleoside monophosphate metabolic process	3/430	41/11595	0.19372812681651	0.841764265094685	gene-dut/gene-ampd3a/gene-adss1	3	adss1/ampd3a/dut	1	gene-adss1	2
BP	GO:0010506	regulation of autophagy	3/430	41/11595	0.19372812681651	0.841764265094685	gene-ctns/gene-LOC122886528/gene-tbc1d14	3	ctns/LOC122886528/tbc1d14	3	gene-ctns/gene-LOC122886528/gene-tbc1d14	0
BP	GO:0043434	response to peptide hormone	3/430	41/11595	0.19372812681651	0.841764265094685	gene-LOC122864683/gene-pid1/gene-si:ch73-335l21.1	3	LOC122864683/pid1/si:ch73-335l21.1	1	gene-LOC122864683	2
BP	GO:0006220	pyrimidine nucleotide metabolic process	2/430	22/11595	0.195525594207958	0.841764265094685	gene-dut/gene-cmpk2	2	cmpk2/dut	1	gene-cmpk2	1
BP	GO:0006221	pyrimidine nucleotide biosynthetic process	2/430	22/11595	0.195525594207958	0.841764265094685	gene-dut/gene-cmpk2	2	cmpk2/dut	1	gene-cmpk2	1
BP	GO:0008286	insulin receptor signaling pathway	2/430	22/11595	0.195525594207958	0.841764265094685	gene-pid1/gene-si:ch73-335l21.1	2	pid1/si:ch73-335l21.1	0	-	2
BP	GO:0043648	dicarboxylic acid metabolic process	2/430	22/11595	0.195525594207958	0.841764265094685	gene-hal/gene-aldh1l2	2	aldh1l2/hal	2	gene-aldh1l2/gene-hal	0
BP	GO:0051054	positive regulation of DNA metabolic process	2/430	22/11595	0.195525594207958	0.841764265094685	gene-LOC122877917/gene-cbx8a	2	cbx8a/LOC122877917	1	gene-LOC122877917	1
BP	GO:0070482	response to oxygen levels	2/430	22/11595	0.195525594207958	0.841764265094685	gene-ddit3/gene-apln	2	apln/ddit3	2	gene-apln/gene-ddit3	0
BP	GO:0030155	regulation of cell adhesion	5/430	84/11595	0.200888907919515	0.859659741097025	gene-swap70a/gene-ndnf/gene-LOC122877917/gene-snai2/gene-tnca	5	LOC122877917/ndnf/snai2/swap70a/tnca	1	gene-LOC122877917	4
BP	GO:0055082	cellular chemical homeostasis	5/430	84/11595	0.200888907919515	0.859659741097025	gene-swap70a/gene-LOC122881776/gene-LOC122881039/gene-slc31a2/gene-LOC122868396	5	LOC122868396/LOC122881039/LOC122881776/slc31a2/swap70a	3	gene-LOC122868396/gene-LOC122881776/gene-slc31a2	2
BP	GO:0002253	activation of immune response	4/430	63/11595	0.2050560780741	0.871739486601604	gene-LOC122868841/gene-LOC122870587/gene-LOC122869735/gene-LOC122869738	4	LOC122868841/LOC122869735/LOC122869738/LOC122870587	4	gene-LOC122868841/gene-LOC122869735/gene-LOC122869738/gene-LOC122870587	0
BP	GO:0008284	positive regulation of cell population proliferation	4/430	63/11595	0.2050560780741	0.871739486601604	gene-fgfr3/gene-tnca/gene-cbx8a/gene-sapcd1	4	cbx8a/fgfr3/sapcd1/tnca	1	gene-sapcd1	3
BP	GO:0009127	purine nucleoside monophosphate biosynthetic process	2/430	23/11595	0.209217476784385	0.871739486601604	gene-ampd3a/gene-adss1	2	adss1/ampd3a	1	gene-adss1	1
BP	GO:0009168	purine ribonucleoside monophosphate biosynthetic process	2/430	23/11595	0.209217476784385	0.871739486601604	gene-ampd3a/gene-adss1	2	adss1/ampd3a	1	gene-adss1	1
BP	GO:0018958	phenol-containing compound metabolic process	2/430	23/11595	0.209217476784385	0.871739486601604	gene-tph2/gene-ddc	2	ddc/tph2	1	gene-ddc	1
BP	GO:0035384	thioester biosynthetic process	2/430	23/11595	0.209217476784385	0.871739486601604	gene-elovl5/gene-acaca	2	acaca/elovl5	2	gene-acaca/gene-elovl5	0
BP	GO:0045103	intermediate filament-based process	2/430	23/11595	0.209217476784385	0.871739486601604	gene-evpla/gene-ppl	2	evpla/ppl	2	gene-evpla/gene-ppl	0
BP	GO:0045104	intermediate filament cytoskeleton organization	2/430	23/11595	0.209217476784385	0.871739486601604	gene-evpla/gene-ppl	2	evpla/ppl	2	gene-evpla/gene-ppl	0
BP	GO:0071616	acyl-CoA biosynthetic process	2/430	23/11595	0.209217476784385	0.871739486601604	gene-elovl5/gene-acaca	2	acaca/elovl5	2	gene-acaca/gene-elovl5	0
BP	GO:0008652	cellular amino acid biosynthetic process	3/430	43/11595	0.2130116643733	0.881080561653676	gene-LOC122876938/gene-psat1/gene-cbsa	3	cbsa/LOC122876938/psat1	3	gene-cbsa/gene-LOC122876938/gene-psat1	0
BP	GO:0009064	glutamine family amino acid metabolic process	3/430	43/11595	0.2130116643733	0.881080561653676	gene-hal/gene-ddah1/gene-arg2	3	arg2/ddah1/hal	2	gene-arg2/gene-hal	1
BP	GO:0006869	lipid transport	7/430	131/11595	0.213314241242469	0.881080561653676	gene-atp8b4/gene-LOC122876099/gene-osbpl3b/gene-LOC122883087/gene-LOC122865700/gene-osbp2a/gene-tex2	7	atp8b4/LOC122865700/LOC122876099/LOC122883087/osbp2a/osbpl3b/tex2	5	gene-atp8b4/gene-LOC122865700/gene-LOC122876099/gene-LOC122883087/gene-osbp2a	2
BP	GO:0007169	transmembrane receptor protein tyrosine kinase signaling pathway	9/430	178/11595	0.215957960591149	0.883916815746187	gene-fgf7/gene-pid1/gene-kdrl/gene-LOC122880049/gene-csf1ra/gene-LOC122887564/gene-LOC122888753/gene-efna1a/gene-si:ch73-335l21.1	9	csf1ra/efna1a/fgf7/kdrl/LOC122880049/LOC122887564/LOC122888753/pid1/si:ch73-335l21.1	4	gene-csf1ra/gene-efna1a/gene-LOC122880049/gene-LOC122888753	5
BP	GO:0072521	purine-containing compound metabolic process	9/430	178/11595	0.215957960591149	0.883916815746187	gene-ampd3a/gene-LOC122872164/gene-gda/gene-pde4ba/gene-macrod1/gene-elovl5/gene-acaca/gene-adss1/gene-LOC122869764	9	acaca/adss1/ampd3a/elovl5/gda/LOC122869764/LOC122872164/macrod1/pde4ba	7	gene-acaca/gene-adss1/gene-elovl5/gene-gda/gene-LOC122869764/gene-LOC122872164/gene-macrod1	2
BP	GO:0032101	regulation of response to external stimulus	8/430	155/11595	0.217837488258342	0.883916815746187	gene-swap70a/gene-LOC122878212/gene-LOC122877917/gene-omgb/gene-snai2/gene-LOC122865952/gene-LOC122869242/gene-tafa5a	8	LOC122865952/LOC122869242/LOC122877917/LOC122878212/omgb/snai2/swap70a/tafa5a	4	gene-LOC122869242/gene-LOC122877917/gene-LOC122878212/gene-omgb	4
BP	GO:0071417	cellular response to organonitrogen compound	4/430	65/11595	0.220718780474294	0.883916815746187	gene-LOC122864683/gene-LOC122877917/gene-pid1/gene-si:ch73-335l21.1	4	LOC122864683/LOC122877917/pid1/si:ch73-335l21.1	2	gene-LOC122864683/gene-LOC122877917	2
BP	GO:0001655	urogenital system development	5/430	87/11595	0.220879009468066	0.883916815746187	gene-LOC122870658/gene-cxadr/gene-pard6gb/gene-tnca/gene-LOC122865952	5	cxadr/LOC122865952/LOC122870658/pard6gb/tnca	2	gene-cxadr/gene-LOC122870658	3
BP	GO:0030042	actin filament depolymerization	3/430	44/11595	0.222804178726508	0.883916815746187	gene-swap70a/gene-LOC122871423/gene-eps8a	3	eps8a/LOC122871423/swap70a	2	gene-eps8a/gene-LOC122871423	1
BP	GO:0040013	negative regulation of locomotion	3/430	44/11595	0.222804178726508	0.883916815746187	gene-podn/gene-LOC122877917/gene-tafa5a	3	LOC122877917/podn/tafa5a	2	gene-LOC122877917/gene-podn	1
BP	GO:0006612	protein targeting to membrane	2/430	24/11595	0.223002293610772	0.883916815746187	gene-LOC122878347/gene-LOC122863926	2	LOC122863926/LOC122878347	2	gene-LOC122863926/gene-LOC122878347	0
BP	GO:0031214	biomineral tissue development	2/430	24/11595	0.223002293610772	0.883916815746187	gene-pth4/gene-pthlha	2	pth4/pthlha	1	gene-pth4	1
BP	GO:0072528	pyrimidine-containing compound biosynthetic process	2/430	24/11595	0.223002293610772	0.883916815746187	gene-dut/gene-cmpk2	2	cmpk2/dut	1	gene-cmpk2	1
BP	GO:0110148	biomineralization	2/430	24/11595	0.223002293610772	0.883916815746187	gene-pth4/gene-pthlha	2	pth4/pthlha	1	gene-pth4	1
BP	GO:1901343	negative regulation of vasculature development	2/430	24/11595	0.223002293610772	0.883916815746187	gene-LOC122877917/gene-tafa5a	2	LOC122877917/tafa5a	1	gene-LOC122877917	1
BP	GO:0110053	regulation of actin filament organization	6/430	110/11595	0.223836186619182	0.883916815746187	gene-swap70a/gene-LOC122885147/gene-fmn2a/gene-LOC122861414/gene-fmn1/gene-eps8a	6	eps8a/fmn1/fmn2a/LOC122861414/LOC122885147/swap70a	4	gene-eps8a/gene-fmn1/gene-LOC122861414/gene-LOC122885147	2
BP	GO:0001701	in utero embryonic development	3/430	45/11595	0.232683770485754	0.883916815746187	gene-LOC122877917/gene-rundc1/gene-mrtfbb	3	LOC122877917/mrtfbb/rundc1	2	gene-LOC122877917/gene-rundc1	1
BP	GO:0009063	cellular amino acid catabolic process	3/430	45/11595	0.232683770485754	0.883916815746187	gene-hal/gene-ddah1/gene-enosf1	3	ddah1/enosf1/hal	2	gene-enosf1/gene-hal	1
BP	GO:0044057	regulation of system process	5/430	89/11595	0.234530125500167	0.883916815746187	gene-parvb/gene-LOC122877917/gene-apln/gene-edn1/gene-pdzph1	5	apln/edn1/LOC122877917/parvb/pdzph1	4	gene-apln/gene-LOC122877917/gene-parvb/gene-pdzph1	1
BP	GO:0055080	cation homeostasis	5/430	89/11595	0.234530125500167	0.883916815746187	gene-swap70a/gene-LOC122881776/gene-LOC122881039/gene-slc31a2/gene-LOC122868396	5	LOC122868396/LOC122881039/LOC122881776/slc31a2/swap70a	3	gene-LOC122868396/gene-LOC122881776/gene-slc31a2	2
BP	GO:0061448	connective tissue development	5/430	89/11595	0.234530125500167	0.883916815746187	gene-skib/gene-LOC122881519/gene-snai2/gene-tgfb3/gene-nog2	5	LOC122881519/nog2/skib/snai2/tgfb3	1	gene-LOC122881519	4
BP	GO:0098771	inorganic ion homeostasis	5/430	89/11595	0.234530125500167	0.883916815746187	gene-swap70a/gene-LOC122881776/gene-LOC122881039/gene-slc31a2/gene-LOC122868396	5	LOC122868396/LOC122881039/LOC122881776/slc31a2/swap70a	3	gene-LOC122868396/gene-LOC122881776/gene-slc31a2	2
BP	GO:0000082	G1/S transition of mitotic cell cycle	2/430	25/11595	0.236854394378112	0.883916815746187	gene-LOC122877917/gene-LOC122865952	2	LOC122865952/LOC122877917	1	gene-LOC122877917	1
BP	GO:0006094	gluconeogenesis	2/430	25/11595	0.236854394378112	0.883916815746187	gene-fbp2/gene-pck2	2	fbp2/pck2	2	gene-fbp2/gene-pck2	0
BP	GO:0019319	hexose biosynthetic process	2/430	25/11595	0.236854394378112	0.883916815746187	gene-fbp2/gene-pck2	2	fbp2/pck2	2	gene-fbp2/gene-pck2	0
BP	GO:0042168	heme metabolic process	2/430	25/11595	0.236854394378112	0.883916815746187	gene-flvcr1/gene-hmox1a	2	flvcr1/hmox1a	2	gene-flvcr1/gene-hmox1a	0
BP	GO:0043542	endothelial cell migration	2/430	25/11595	0.236854394378112	0.883916815746187	gene-LOC122877917/gene-snai2	2	LOC122877917/snai2	1	gene-LOC122877917	1
BP	GO:0046364	monosaccharide biosynthetic process	2/430	25/11595	0.236854394378112	0.883916815746187	gene-fbp2/gene-pck2	2	fbp2/pck2	2	gene-fbp2/gene-pck2	0
BP	GO:0061387	regulation of extent of cell growth	2/430	25/11595	0.236854394378112	0.883916815746187	gene-omgb/gene-pard6gb	2	omgb/pard6gb	1	gene-omgb	1
BP	GO:0072009	nephron epithelium development	2/430	25/11595	0.236854394378112	0.883916815746187	gene-LOC122870658/gene-LOC122865952	2	LOC122865952/LOC122870658	1	gene-LOC122870658	1
BP	GO:0009152	purine ribonucleotide biosynthetic process	5/430	90/11595	0.241443486746478	0.883916815746187	gene-ampd3a/gene-elovl5/gene-acaca/gene-adss1/gene-LOC122869764	5	acaca/adss1/ampd3a/elovl5/LOC122869764	4	gene-acaca/gene-adss1/gene-elovl5/gene-LOC122869764	1
BP	GO:0002009	morphogenesis of an epithelium	8/430	160/11595	0.243083751369129	0.883916815746187	gene-skib/gene-amotl2a/gene-LOC122877917/gene-snai2/gene-pard6gb/gene-tnca/gene-sapcd1/gene-LOC122871826	8	amotl2a/LOC122871826/LOC122877917/pard6gb/sapcd1/skib/snai2/tnca	2	gene-LOC122877917/gene-sapcd1	6
BP	GO:0030198	extracellular matrix organization	4/430	68/11595	0.244769830873157	0.883916815746187	gene-lamb3/gene-LOC122870658/gene-ndnf/gene-LOC122865952	4	lamb3/LOC122865952/LOC122870658/ndnf	2	gene-lamb3/gene-LOC122870658	2
BP	GO:0045229	external encapsulating structure organization	4/430	68/11595	0.244769830873157	0.883916815746187	gene-lamb3/gene-LOC122870658/gene-ndnf/gene-LOC122865952	4	lamb3/LOC122865952/LOC122870658/ndnf	2	gene-lamb3/gene-LOC122870658	2
BP	GO:0090287	regulation of cellular response to growth factor stimulus	4/430	68/11595	0.244769830873157	0.883916815746187	gene-LOC122881519/gene-bambia/gene-nog2/gene-LOC122871826	4	bambia/LOC122871826/LOC122881519/nog2	1	gene-LOC122881519	3
BP	GO:0060429	epithelium development	14/430	306/11595	0.246546817460035	0.883916815746187	gene-skib/gene-LOC122870658/gene-amotl2a/gene-LOC122877917/gene-LOC122882909/gene-LOC122882907/gene-snai2/gene-grhl2b/gene-pard6gb/gene-tnca/gene-LOC122865952/gene-LOC122869123/gene-sapcd1/gene-LOC122871826	14	amotl2a/grhl2b/LOC122865952/LOC122869123/LOC122870658/LOC122871826/LOC122877917/LOC122882907/LOC122882909/pard6gb/sapcd1/skib/snai2/tnca	7	gene-grhl2b/gene-LOC122869123/gene-LOC122870658/gene-LOC122877917/gene-LOC122882907/gene-LOC122882909/gene-sapcd1	7
BP	GO:0006778	porphyrin-containing compound metabolic process	2/430	26/11595	0.250749895201875	0.883916815746187	gene-flvcr1/gene-hmox1a	2	flvcr1/hmox1a	2	gene-flvcr1/gene-hmox1a	0
BP	GO:0009126	purine nucleoside monophosphate metabolic process	2/430	26/11595	0.250749895201875	0.883916815746187	gene-ampd3a/gene-adss1	2	adss1/ampd3a	1	gene-adss1	1
BP	GO:0009167	purine ribonucleoside monophosphate metabolic process	2/430	26/11595	0.250749895201875	0.883916815746187	gene-ampd3a/gene-adss1	2	adss1/ampd3a	1	gene-adss1	1
BP	GO:0043588	skin development	2/430	26/11595	0.250749895201875	0.883916815746187	gene-LOC122882909/gene-LOC122882907	2	LOC122882907/LOC122882909	2	gene-LOC122882907/gene-LOC122882909	0
BP	GO:0022604	regulation of cell morphogenesis	3/430	47/11595	0.252665235750121	0.883916815746187	gene-amotl2a/gene-LOC122867164/gene-LOC122869492	3	amotl2a/LOC122867164/LOC122869492	1	gene-LOC122869492	2
BP	GO:0031667	response to nutrient levels	3/430	47/11595	0.252665235750121	0.883916815746187	gene-snai2/gene-tnca/gene-LOC122865952	3	LOC122865952/snai2/tnca	0	-	3
BP	GO:0032496	response to lipopolysaccharide	4/430	69/11595	0.252914793232842	0.883916815746187	gene-cmpk2/gene-LOC122868820/gene-LOC122869242/gene-LOC122870595	4	cmpk2/LOC122868820/LOC122869242/LOC122870595	2	gene-cmpk2/gene-LOC122869242	2
BP	GO:0043062	extracellular structure organization	4/430	69/11595	0.252914793232842	0.883916815746187	gene-lamb3/gene-LOC122870658/gene-ndnf/gene-LOC122865952	4	lamb3/LOC122865952/LOC122870658/ndnf	2	gene-lamb3/gene-LOC122870658	2
BP	GO:0022008	neurogenesis	19/430	432/11595	0.252966658471717	0.883916815746187	gene-nav2a/gene-LOC122872091/gene-reln/gene-nsmfb/gene-ndnf/gene-LOC122877917/gene-omgb/gene-myot/gene-LOC122887176/gene-LOC122888546/gene-id2a/gene-pard6gb/gene-ndrg1a/gene-tnca/gene-LOC122867164/gene-LOC122869123/gene-si:ch211-278a6.1/gene-mrtfbb/gene-rpgrb	19	id2a/LOC122867164/LOC122869123/LOC122872091/LOC122877917/LOC122887176/LOC122888546/mrtfbb/myot/nav2a/ndnf/ndrg1a/nsmfb/omgb/pard6gb/reln/rpgrb/si:ch211-278a6.1/tnca	7	gene-LOC122869123/gene-LOC122877917/gene-myot/gene-ndrg1a/gene-nsmfb/gene-omgb/gene-si:ch211-278a6.1	12
BP	GO:0008015	blood circulation	6/430	115/11595	0.254512007793754	0.883916815746187	gene-parvb/gene-lrrc39/gene-apln/gene-LOC122863516/gene-edn1/gene-pdzph1	6	apln/edn1/LOC122863516/lrrc39/parvb/pdzph1	4	gene-apln/gene-lrrc39/gene-parvb/gene-pdzph1	2
BP	GO:0046394	carboxylic acid biosynthetic process	6/430	115/11595	0.254512007793754	0.883916815746187	gene-LOC122876938/gene-psat1/gene-elovl5/gene-acaca/gene-LOC122871599/gene-cbsa	6	acaca/cbsa/elovl5/LOC122871599/LOC122876938/psat1	6	gene-acaca/gene-cbsa/gene-elovl5/gene-LOC122871599/gene-LOC122876938/gene-psat1	0
BP	GO:0060548	negative regulation of cell death	6/430	115/11595	0.254512007793754	0.883916815746187	gene-LOC122877908/gene-ndnf/gene-LOC122877917/gene-snai2/gene-angptl4/gene-LOC122868820	6	angptl4/LOC122868820/LOC122877908/LOC122877917/ndnf/snai2	2	gene-LOC122877908/gene-LOC122877917	4
BP	GO:0010876	lipid localization	7/430	139/11595	0.257526867197871	0.883916815746187	gene-atp8b4/gene-LOC122876099/gene-osbpl3b/gene-LOC122883087/gene-LOC122865700/gene-osbp2a/gene-tex2	7	atp8b4/LOC122865700/LOC122876099/LOC122883087/osbp2a/osbpl3b/tex2	5	gene-atp8b4/gene-LOC122865700/gene-LOC122876099/gene-LOC122883087/gene-osbp2a	2
BP	GO:0016053	organic acid biosynthetic process	6/430	116/11595	0.260783797230496	0.883916815746187	gene-LOC122876938/gene-psat1/gene-elovl5/gene-acaca/gene-LOC122871599/gene-cbsa	6	acaca/cbsa/elovl5/LOC122871599/LOC122876938/psat1	6	gene-acaca/gene-cbsa/gene-elovl5/gene-LOC122871599/gene-LOC122876938/gene-psat1	0
BP	GO:0050801	ion homeostasis	5/430	93/11595	0.262496580775411	0.883916815746187	gene-swap70a/gene-LOC122881776/gene-LOC122881039/gene-slc31a2/gene-LOC122868396	5	LOC122868396/LOC122881039/LOC122881776/slc31a2/swap70a	3	gene-LOC122868396/gene-LOC122881776/gene-slc31a2	2
BP	GO:0009991	response to extracellular stimulus	3/430	48/11595	0.262748219904481	0.883916815746187	gene-snai2/gene-tnca/gene-LOC122865952	3	LOC122865952/snai2/tnca	0	-	3
BP	GO:0030838	positive regulation of actin filament polymerization	3/430	48/11595	0.262748219904481	0.883916815746187	gene-fmn2a/gene-LOC122861414/gene-fmn1	3	fmn1/fmn2a/LOC122861414	2	gene-fmn1/gene-LOC122861414	1
BP	GO:0050804	modulation of chemical synaptic transmission	3/430	48/11595	0.262748219904481	0.883916815746187	gene-nsmfb/gene-nlgn1/gene-LOC122881246	3	LOC122881246/nlgn1/nsmfb	2	gene-nlgn1/gene-nsmfb	1
BP	GO:0099177	regulation of trans-synaptic signaling	3/430	48/11595	0.262748219904481	0.883916815746187	gene-nsmfb/gene-nlgn1/gene-LOC122881246	3	LOC122881246/nlgn1/nsmfb	2	gene-nlgn1/gene-nsmfb	1
BP	GO:0042981	regulation of apoptotic process	12/430	261/11595	0.262883308379091	0.883916815746187	gene-LOC122877908/gene-ndnf/gene-LOC122877917/gene-tnfaip8l2b/gene-LOC122881737/gene-osgin2/gene-snai2/gene-angptl4/gene-ripk2/gene-LOC122865536/gene-LOC122868820/gene-phlda1	12	angptl4/LOC122865536/LOC122868820/LOC122877908/LOC122877917/LOC122881737/ndnf/osgin2/phlda1/ripk2/snai2/tnfaip8l2b	5	gene-LOC122865536/gene-LOC122877908/gene-LOC122877917/gene-osgin2/gene-ripk2	7
BP	GO:0007600	sensory perception	9/430	188/11595	0.263547738941962	0.883916815746187	gene-LOC122887291/gene-LOC122878347/gene-parapinopsina/gene-cryba2b/gene-snai2/gene-LOC122862702/gene-LOC122863926/gene-LOC122865803/gene-myo15b	9	cryba2b/LOC122862702/LOC122863926/LOC122865803/LOC122878347/LOC122887291/myo15b/parapinopsina/snai2	8	gene-cryba2b/gene-LOC122862702/gene-LOC122863926/gene-LOC122865803/gene-LOC122878347/gene-LOC122887291/gene-myo15b/gene-parapinopsina	1
BP	GO:0048729	tissue morphogenesis	9/430	188/11595	0.263547738941962	0.883916815746187	gene-skib/gene-lrrc39/gene-amotl2a/gene-LOC122877917/gene-snai2/gene-pard6gb/gene-tnca/gene-sapcd1/gene-LOC122871826	9	amotl2a/LOC122871826/LOC122877917/lrrc39/pard6gb/sapcd1/skib/snai2/tnca	3	gene-LOC122877917/gene-lrrc39/gene-sapcd1	6
BP	GO:0022408	negative regulation of cell-cell adhesion	2/430	27/11595	0.264666583391403	0.883916815746187	gene-swap70a/gene-LOC122877917	2	LOC122877917/swap70a	1	gene-LOC122877917	1
BP	GO:0032835	glomerulus development	2/430	27/11595	0.264666583391403	0.883916815746187	gene-LOC122870658/gene-LOC122865952	2	LOC122865952/LOC122870658	1	gene-LOC122870658	1
BP	GO:0003013	circulatory system process	6/430	117/11595	0.267096003333366	0.883916815746187	gene-parvb/gene-lrrc39/gene-apln/gene-LOC122863516/gene-edn1/gene-pdzph1	6	apln/edn1/LOC122863516/lrrc39/parvb/pdzph1	4	gene-apln/gene-lrrc39/gene-parvb/gene-pdzph1	2
BP	GO:0006954	inflammatory response	8/430	165/11595	0.269247147357835	0.883916815746187	gene-pstpip1b/gene-LOC122873767/gene-LOC122876711/gene-csf1ra/gene-LOC122881737/gene-LOC122881975/gene-LOC122881976/gene-LOC122869242	8	csf1ra/LOC122869242/LOC122873767/LOC122876711/LOC122881737/LOC122881975/LOC122881976/pstpip1b	7	gene-csf1ra/gene-LOC122869242/gene-LOC122873767/gene-LOC122876711/gene-LOC122881975/gene-LOC122881976/gene-pstpip1b	1
BP	GO:0006164	purine nucleotide biosynthetic process	5/430	94/11595	0.26960801841435	0.883916815746187	gene-ampd3a/gene-elovl5/gene-acaca/gene-adss1/gene-LOC122869764	5	acaca/adss1/ampd3a/elovl5/LOC122869764	4	gene-acaca/gene-adss1/gene-elovl5/gene-LOC122869764	1
BP	GO:0009165	nucleotide biosynthetic process	7/430	142/11595	0.274761244250089	0.883916815746187	gene-dut/gene-ampd3a/gene-elovl5/gene-acaca/gene-adss1/gene-cmpk2/gene-LOC122869764	7	acaca/adss1/ampd3a/cmpk2/dut/elovl5/LOC122869764	5	gene-acaca/gene-adss1/gene-cmpk2/gene-elovl5/gene-LOC122869764	2
BP	GO:0018193	peptidyl-amino acid modification	7/430	142/11595	0.274761244250089	0.883916815746187	gene-padi2/gene-dok7b/gene-ndnf/gene-snai2/gene-gfi1aa/gene-loxl3b/gene-LOC122869123	7	dok7b/gfi1aa/LOC122869123/loxl3b/ndnf/padi2/snai2	3	gene-gfi1aa/gene-LOC122869123/gene-padi2	4
BP	GO:0009887	animal organ morphogenesis	12/430	264/11595	0.275449026828671	0.883916815746187	gene-skib/gene-lamb3/gene-znf703/gene-lrrc39/gene-cadm4/gene-snai2/gene-id2a/gene-tnca/gene-mrtfbb/gene-pthlha/gene-sapcd1/gene-rpgrb	12	cadm4/id2a/lamb3/lrrc39/mrtfbb/pthlha/rpgrb/sapcd1/skib/snai2/tnca/znf703	4	gene-cadm4/gene-lamb3/gene-lrrc39/gene-sapcd1	8
BP	GO:0043067	regulation of programmed cell death	12/430	264/11595	0.275449026828671	0.883916815746187	gene-LOC122877908/gene-ndnf/gene-LOC122877917/gene-tnfaip8l2b/gene-LOC122881737/gene-osgin2/gene-snai2/gene-angptl4/gene-ripk2/gene-LOC122865536/gene-LOC122868820/gene-phlda1	12	angptl4/LOC122865536/LOC122868820/LOC122877908/LOC122877917/LOC122881737/ndnf/osgin2/phlda1/ripk2/snai2/tnfaip8l2b	5	gene-LOC122865536/gene-LOC122877908/gene-LOC122877917/gene-osgin2/gene-ripk2	7
BP	GO:0007368	determination of left/right symmetry	5/430	95/11595	0.276761049193466	0.883916815746187	gene-skib/gene-znf703/gene-apln/gene-rpgrb/gene-LOC122871826	5	apln/LOC122871826/rpgrb/skib/znf703	1	gene-apln	4
BP	GO:0002521	leukocyte differentiation	4/430	72/11595	0.277662739931207	0.883916815746187	gene-cebpa/gene-cfap251/gene-zbtb46/gene-lrrc17	4	cebpa/cfap251/lrrc17/zbtb46	2	gene-cebpa/gene-cfap251	2
BP	GO:0033013	tetrapyrrole metabolic process	2/430	28/11595	0.278583826827028	0.883916815746187	gene-flvcr1/gene-hmox1a	2	flvcr1/hmox1a	2	gene-flvcr1/gene-hmox1a	0
BP	GO:0042074	cell migration involved in gastrulation	2/430	28/11595	0.278583826827028	0.883916815746187	gene-snai1a/gene-apln	2	apln/snai1a	1	gene-apln	1
BP	GO:0009953	dorsal/ventral pattern formation	3/430	50/11595	0.283053321690341	0.883916815746187	gene-skib/gene-snai1a/gene-caprin2	3	caprin2/skib/snai1a	1	gene-caprin2	2
BP	GO:0022411	cellular component disassembly	5/430	96/11595	0.28395252794022	0.883916815746187	gene-swap70a/gene-LOC122886528/gene-snai2/gene-LOC122871423/gene-eps8a	5	eps8a/LOC122871423/LOC122886528/snai2/swap70a	3	gene-eps8a/gene-LOC122871423/gene-LOC122886528	2
BP	GO:0030833	regulation of actin filament polymerization	5/430	96/11595	0.28395252794022	0.883916815746187	gene-LOC122885147/gene-fmn2a/gene-LOC122861414/gene-fmn1/gene-eps8a	5	eps8a/fmn1/fmn2a/LOC122861414/LOC122885147	4	gene-eps8a/gene-fmn1/gene-LOC122861414/gene-LOC122885147	1
BP	GO:1901293	nucleoside phosphate biosynthetic process	7/430	144/11595	0.286414060407391	0.883916815746187	gene-dut/gene-ampd3a/gene-elovl5/gene-acaca/gene-adss1/gene-cmpk2/gene-LOC122869764	7	acaca/adss1/ampd3a/cmpk2/dut/elovl5/LOC122869764	5	gene-acaca/gene-adss1/gene-cmpk2/gene-elovl5/gene-LOC122869764	2
BP	GO:0032103	positive regulation of response to external stimulus	2/430	29/11595	0.292482487735372	0.883916815746187	gene-swap70a/gene-snai2	2	snai2/swap70a	0	-	2
BP	GO:0033866	nucleoside bisphosphate biosynthetic process	2/430	29/11595	0.292482487735372	0.883916815746187	gene-elovl5/gene-acaca	2	acaca/elovl5	2	gene-acaca/gene-elovl5	0
BP	GO:0034030	ribonucleoside bisphosphate biosynthetic process	2/430	29/11595	0.292482487735372	0.883916815746187	gene-elovl5/gene-acaca	2	acaca/elovl5	2	gene-acaca/gene-elovl5	0
BP	GO:0034033	purine nucleoside bisphosphate biosynthetic process	2/430	29/11595	0.292482487735372	0.883916815746187	gene-elovl5/gene-acaca	2	acaca/elovl5	2	gene-acaca/gene-elovl5	0
BP	GO:0099173	postsynapse organization	2/430	29/11595	0.292482487735372	0.883916815746187	gene-cnksr1/gene-si:ch211-278a6.1	2	cnksr1/si:ch211-278a6.1	1	gene-si:ch211-278a6.1	1
BP	GO:0002237	response to molecule of bacterial origin	4/430	74/11595	0.294372945224467	0.883916815746187	gene-cmpk2/gene-LOC122868820/gene-LOC122869242/gene-LOC122870595	4	cmpk2/LOC122868820/LOC122869242/LOC122870595	2	gene-cmpk2/gene-LOC122869242	2
BP	GO:0000122	negative regulation of transcription by RNA polymerase II	5/430	98/11595	0.298438345546522	0.883916815746187	gene-LOC122877917/gene-snai2/gene-jazf1a/gene-LOC122865952/gene-cbx8a	5	cbx8a/jazf1a/LOC122865952/LOC122877917/snai2	1	gene-LOC122877917	4
BP	GO:0072522	purine-containing compound biosynthetic process	5/430	98/11595	0.298438345546522	0.883916815746187	gene-ampd3a/gene-elovl5/gene-acaca/gene-adss1/gene-LOC122869764	5	acaca/adss1/ampd3a/elovl5/LOC122869764	4	gene-acaca/gene-adss1/gene-elovl5/gene-LOC122869764	1
BP	GO:0003008	system process	18/430	421/11595	0.300125321159233	0.883916815746187	gene-LOC122887291/gene-LOC122870658/gene-parvb/gene-lrrc39/gene-LOC122878347/gene-ctns/gene-LOC122877917/gene-apln/gene-parapinopsina/gene-cryba2b/gene-snai2/gene-LOC122863516/gene-LOC122862702/gene-edn1/gene-LOC122863926/gene-LOC122865803/gene-pdzph1/gene-myo15b	18	apln/cryba2b/ctns/edn1/LOC122862702/LOC122863516/LOC122863926/LOC122865803/LOC122870658/LOC122877917/LOC122878347/LOC122887291/lrrc39/myo15b/parapinopsina/parvb/pdzph1/snai2	15	gene-apln/gene-cryba2b/gene-ctns/gene-LOC122862702/gene-LOC122863926/gene-LOC122865803/gene-LOC122870658/gene-LOC122877917/gene-LOC122878347/gene-LOC122887291/gene-lrrc39/gene-myo15b/gene-parapinopsina/gene-parvb/gene-pdzph1	3
BP	GO:0030335	positive regulation of cell migration	3/430	52/11595	0.303486455958287	0.883916815746187	gene-swap70a/gene-snai2/gene-LOC122871413	3	LOC122871413/snai2/swap70a	1	gene-LOC122871413	2
BP	GO:0010631	epithelial cell migration	2/430	30/11595	0.306344840662414	0.883916815746187	gene-LOC122877917/gene-snai2	2	LOC122877917/snai2	1	gene-LOC122877917	1
BP	GO:0044843	cell cycle G1/S phase transition	2/430	30/11595	0.306344840662414	0.883916815746187	gene-LOC122877917/gene-LOC122865952	2	LOC122865952/LOC122877917	1	gene-LOC122877917	1
BP	GO:0072527	pyrimidine-containing compound metabolic process	2/430	30/11595	0.306344840662414	0.883916815746187	gene-dut/gene-cmpk2	2	cmpk2/dut	1	gene-cmpk2	1
BP	GO:0006914	autophagy	6/430	124/11595	0.312228036996921	0.883916815746187	gene-ctns/gene-si:ch211-153b23.5/gene-wdfy4/gene-LOC122886528/gene-LOC122869437/gene-tbc1d14	6	ctns/LOC122869437/LOC122886528/si:ch211-153b23.5/tbc1d14/wdfy4	6	gene-ctns/gene-LOC122869437/gene-LOC122886528/gene-si:ch211-153b23.5/gene-tbc1d14/gene-wdfy4	0
BP	GO:0061919	process utilizing autophagic mechanism	6/430	124/11595	0.312228036996921	0.883916815746187	gene-ctns/gene-si:ch211-153b23.5/gene-wdfy4/gene-LOC122886528/gene-LOC122869437/gene-tbc1d14	6	ctns/LOC122869437/LOC122886528/si:ch211-153b23.5/tbc1d14/wdfy4	6	gene-ctns/gene-LOC122869437/gene-LOC122886528/gene-si:ch211-153b23.5/gene-tbc1d14/gene-wdfy4	0
BP	GO:0030855	epithelial cell differentiation	5/430	100/11595	0.313040741905428	0.883916815746187	gene-LOC122870658/gene-LOC122877917/gene-LOC122882909/gene-LOC122882907/gene-LOC122865952	5	LOC122865952/LOC122870658/LOC122877917/LOC122882907/LOC122882909	4	gene-LOC122870658/gene-LOC122877917/gene-LOC122882907/gene-LOC122882909	1
BP	GO:2000147	positive regulation of cell motility	3/430	53/11595	0.313730479686964	0.883916815746187	gene-swap70a/gene-snai2/gene-LOC122871413	3	LOC122871413/snai2/swap70a	1	gene-LOC122871413	2
BP	GO:0000132	establishment of mitotic spindle orientation	1/430	10/11595	0.314804038564799	0.883916815746187	gene-sapcd1	1	sapcd1	1	gene-sapcd1	0
BP	GO:0001935	endothelial cell proliferation	1/430	10/11595	0.314804038564799	0.883916815746187	gene-amotl2a	1	amotl2a	0	-	1
BP	GO:0002688	regulation of leukocyte chemotaxis	1/430	10/11595	0.314804038564799	0.883916815746187	gene-swap70a	1	swap70a	0	-	1
BP	GO:0006026	aminoglycan catabolic process	1/430	10/11595	0.314804038564799	0.883916815746187	gene-pglyrp5	1	pglyrp5	0	-	1
BP	GO:0006027	glycosaminoglycan catabolic process	1/430	10/11595	0.314804038564799	0.883916815746187	gene-pglyrp5	1	pglyrp5	0	-	1
BP	GO:0006144	purine nucleobase metabolic process	1/430	10/11595	0.314804038564799	0.883916815746187	gene-gda	1	gda	1	gene-gda	0
BP	GO:0009086	methionine biosynthetic process	1/430	10/11595	0.314804038564799	0.883916815746187	gene-LOC122876938	1	LOC122876938	1	gene-LOC122876938	0
BP	GO:0016574	histone ubiquitination	1/430	10/11595	0.314804038564799	0.883916815746187	gene-cbx8a	1	cbx8a	0	-	1
BP	GO:0019827	stem cell population maintenance	1/430	10/11595	0.314804038564799	0.883916815746187	gene-LOC122877917	1	LOC122877917	1	gene-LOC122877917	0
BP	GO:0021884	forebrain neuron development	1/430	10/11595	0.314804038564799	0.883916815746187	gene-ndnf	1	ndnf	0	-	1
BP	GO:0030278	regulation of ossification	1/430	10/11595	0.314804038564799	0.883916815746187	gene-tgfb3	1	tgfb3	0	-	1
BP	GO:0030917	midbrain-hindbrain boundary development	1/430	10/11595	0.314804038564799	0.883916815746187	gene-grhl2b	1	grhl2b	1	gene-grhl2b	0
BP	GO:0032784	regulation of DNA-templated transcription, elongation	1/430	10/11595	0.314804038564799	0.883916815746187	gene-LOC122880569	1	LOC122880569	1	gene-LOC122880569	0
BP	GO:0035336	long-chain fatty-acyl-CoA metabolic process	1/430	10/11595	0.314804038564799	0.883916815746187	gene-elovl5	1	elovl5	1	gene-elovl5	0
BP	GO:0035338	long-chain fatty-acyl-CoA biosynthetic process	1/430	10/11595	0.314804038564799	0.883916815746187	gene-elovl5	1	elovl5	1	gene-elovl5	0
BP	GO:0035601	protein deacylation	1/430	10/11595	0.314804038564799	0.883916815746187	gene-znf703	1	znf703	0	-	1
BP	GO:0036158	outer dynein arm assembly	1/430	10/11595	0.314804038564799	0.883916815746187	gene-odad3	1	odad3	0	-	1
BP	GO:0046626	regulation of insulin receptor signaling pathway	1/430	10/11595	0.314804038564799	0.883916815746187	gene-pid1	1	pid1	0	-	1
BP	GO:0046949	fatty-acyl-CoA biosynthetic process	1/430	10/11595	0.314804038564799	0.883916815746187	gene-elovl5	1	elovl5	1	gene-elovl5	0
BP	GO:0050853	B cell receptor signaling pathway	1/430	10/11595	0.314804038564799	0.883916815746187	gene-LOC122870587	1	LOC122870587	1	gene-LOC122870587	0
BP	GO:0051099	positive regulation of binding	1/430	10/11595	0.314804038564799	0.883916815746187	gene-LOC122877917	1	LOC122877917	1	gene-LOC122877917	0
BP	GO:0051294	establishment of spindle orientation	1/430	10/11595	0.314804038564799	0.883916815746187	gene-sapcd1	1	sapcd1	1	gene-sapcd1	0
BP	GO:0051568	histone H3-K4 methylation	1/430	10/11595	0.314804038564799	0.883916815746187	gene-gfi1aa	1	gfi1aa	1	gene-gfi1aa	0
BP	GO:0060541	respiratory system development	1/430	10/11595	0.314804038564799	0.883916815746187	gene-tnca	1	tnca	0	-	1
BP	GO:0061045	negative regulation of wound healing	1/430	10/11595	0.314804038564799	0.883916815746187	gene-tafa5a	1	tafa5a	0	-	1
BP	GO:0070849	response to epidermal growth factor	1/430	10/11595	0.314804038564799	0.883916815746187	gene-snai2	1	snai2	0	-	1
BP	GO:0071364	cellular response to epidermal growth factor stimulus	1/430	10/11595	0.314804038564799	0.883916815746187	gene-snai2	1	snai2	0	-	1
BP	GO:0071621	granulocyte chemotaxis	1/430	10/11595	0.314804038564799	0.883916815746187	gene-LOC122873767	1	LOC122873767	1	gene-LOC122873767	0
BP	GO:0097720	calcineurin-mediated signaling	1/430	10/11595	0.314804038564799	0.883916815746187	gene-rcan1b	1	rcan1b	1	gene-rcan1b	0
BP	GO:0098661	inorganic anion transmembrane transport	1/430	10/11595	0.314804038564799	0.883916815746187	gene-slc12a5a	1	slc12a5a	1	gene-slc12a5a	0
BP	GO:0098727	maintenance of cell number	1/430	10/11595	0.314804038564799	0.883916815746187	gene-LOC122877917	1	LOC122877917	1	gene-LOC122877917	0
BP	GO:0098732	macromolecule deacylation	1/430	10/11595	0.314804038564799	0.883916815746187	gene-znf703	1	znf703	0	-	1
BP	GO:1900076	regulation of cellular response to insulin stimulus	1/430	10/11595	0.314804038564799	0.883916815746187	gene-pid1	1	pid1	0	-	1
BP	GO:1901985	positive regulation of protein acetylation	1/430	10/11595	0.314804038564799	0.883916815746187	gene-snai2	1	snai2	0	-	1
BP	GO:1902036	regulation of hematopoietic stem cell differentiation	1/430	10/11595	0.314804038564799	0.883916815746187	gene-tph2	1	tph2	0	-	1
BP	GO:1990266	neutrophil migration	1/430	10/11595	0.314804038564799	0.883916815746187	gene-LOC122873767	1	LOC122873767	1	gene-LOC122873767	0
BP	GO:2000758	positive regulation of peptidyl-lysine acetylation	1/430	10/11595	0.314804038564799	0.883916815746187	gene-snai2	1	snai2	0	-	1
BP	GO:2001222	regulation of neuron migration	1/430	10/11595	0.314804038564799	0.883916815746187	gene-nsmfb	1	nsmfb	1	gene-nsmfb	0
BP	GO:2001243	negative regulation of intrinsic apoptotic signaling pathway	1/430	10/11595	0.314804038564799	0.883916815746187	gene-snai2	1	snai2	0	-	1
BP	GO:0042060	wound healing	4/430	77/11595	0.31966010538833	0.883916815746187	gene-p2ry8/gene-snai2/gene-tnca/gene-tafa5a	4	p2ry8/snai2/tafa5a/tnca	1	gene-p2ry8	3
BP	GO:0001837	epithelial to mesenchymal transition	2/430	31/11595	0.320154494452698	0.883916815746187	gene-snai1a/gene-snai2	2	snai1a/snai2	0	-	2
BP	GO:0016358	dendrite development	2/430	31/11595	0.320154494452698	0.883916815746187	gene-LOC122869123/gene-si:ch211-278a6.1	2	LOC122869123/si:ch211-278a6.1	2	gene-LOC122869123/gene-si:ch211-278a6.1	0
BP	GO:0048545	response to steroid hormone	2/430	31/11595	0.320154494452698	0.883916815746187	gene-paqr8/gene-LOC122865952	2	LOC122865952/paqr8	1	gene-paqr8	1
BP	GO:0060348	bone development	2/430	31/11595	0.320154494452698	0.883916815746187	gene-LOC122869123/gene-lrrc17	2	LOC122869123/lrrc17	1	gene-LOC122869123	1
BP	GO:0048699	generation of neurons	17/430	403/11595	0.326787871745601	0.883916815746187	gene-LOC122872091/gene-reln/gene-nsmfb/gene-ndnf/gene-LOC122877917/gene-omgb/gene-myot/gene-LOC122887176/gene-LOC122888546/gene-id2a/gene-pard6gb/gene-tnca/gene-LOC122867164/gene-LOC122869123/gene-si:ch211-278a6.1/gene-mrtfbb/gene-rpgrb	17	id2a/LOC122867164/LOC122869123/LOC122872091/LOC122877917/LOC122887176/LOC122888546/mrtfbb/myot/ndnf/nsmfb/omgb/pard6gb/reln/rpgrb/si:ch211-278a6.1/tnca	6	gene-LOC122869123/gene-LOC122877917/gene-myot/gene-nsmfb/gene-omgb/gene-si:ch211-278a6.1	11
BP	GO:0009260	ribonucleotide biosynthetic process	5/430	102/11595	0.327735434886639	0.883916815746187	gene-ampd3a/gene-elovl5/gene-acaca/gene-adss1/gene-LOC122869764	5	acaca/adss1/ampd3a/elovl5/LOC122869764	4	gene-acaca/gene-adss1/gene-elovl5/gene-LOC122869764	1
BP	GO:0032984	protein-containing complex disassembly	4/430	78/11595	0.32812992573154	0.883916815746187	gene-swap70a/gene-LOC122886528/gene-LOC122871423/gene-eps8a	4	eps8a/LOC122871423/LOC122886528/swap70a	3	gene-eps8a/gene-LOC122871423/gene-LOC122886528	1
BP	GO:0032956	regulation of actin cytoskeleton organization	6/430	127/11595	0.33195712995777	0.883916815746187	gene-swap70a/gene-LOC122885147/gene-fmn2a/gene-LOC122861414/gene-fmn1/gene-eps8a	6	eps8a/fmn1/fmn2a/LOC122861414/LOC122885147/swap70a	4	gene-eps8a/gene-fmn1/gene-LOC122861414/gene-LOC122885147	2
BP	GO:0035303	regulation of dephosphorylation	2/430	32/11595	0.333896318051414	0.883916815746187	gene-swap70a/gene-zgc:92242	2	swap70a/zgc:92242	1	gene-zgc:92242	1
BP	GO:0051346	negative regulation of hydrolase activity	2/430	32/11595	0.333896318051414	0.883916815746187	gene-LOC122877917/gene-zgc:92242	2	LOC122877917/zgc:92242	2	gene-LOC122877917/gene-zgc:92242	0
BP	GO:0051272	positive regulation of cellular component movement	3/430	55/11595	0.334234704074492	0.883916815746187	gene-swap70a/gene-snai2/gene-LOC122871413	3	LOC122871413/snai2/swap70a	1	gene-LOC122871413	2
BP	GO:0019725	cellular homeostasis	5/430	103/11595	0.335109948345125	0.883916815746187	gene-swap70a/gene-LOC122881776/gene-LOC122881039/gene-slc31a2/gene-LOC122868396	5	LOC122868396/LOC122881039/LOC122881776/slc31a2/swap70a	3	gene-LOC122868396/gene-LOC122881776/gene-slc31a2	2
BP	GO:0046390	ribose phosphate biosynthetic process	5/430	103/11595	0.335109948345125	0.883916815746187	gene-ampd3a/gene-elovl5/gene-acaca/gene-adss1/gene-LOC122869764	5	acaca/adss1/ampd3a/elovl5/LOC122869764	4	gene-acaca/gene-adss1/gene-elovl5/gene-LOC122869764	1
BP	GO:0050778	positive regulation of immune response	4/430	79/11595	0.336612718865482	0.883916815746187	gene-LOC122868841/gene-LOC122870587/gene-LOC122869735/gene-LOC122869738	4	LOC122868841/LOC122869735/LOC122869738/LOC122870587	4	gene-LOC122868841/gene-LOC122869735/gene-LOC122869738/gene-LOC122870587	0
BP	GO:0002062	chondrocyte differentiation	1/430	11/11595	0.340236430745821	0.883916815746187	gene-snai2	1	snai2	0	-	1
BP	GO:0006555	methionine metabolic process	1/430	11/11595	0.340236430745821	0.883916815746187	gene-LOC122876938	1	LOC122876938	1	gene-LOC122876938	0
BP	GO:0006858	extracellular transport	1/430	11/11595	0.340236430745821	0.883916815746187	gene-rpgrb	1	rpgrb	0	-	1
BP	GO:0007204	positive regulation of cytosolic calcium ion concentration	1/430	11/11595	0.340236430745821	0.883916815746187	gene-swap70a	1	swap70a	0	-	1
BP	GO:0009129	pyrimidine nucleoside monophosphate metabolic process	1/430	11/11595	0.340236430745821	0.883916815746187	gene-dut	1	dut	0	-	1
BP	GO:0009130	pyrimidine nucleoside monophosphate biosynthetic process	1/430	11/11595	0.340236430745821	0.883916815746187	gene-dut	1	dut	0	-	1
BP	GO:0009395	phospholipid catabolic process	1/430	11/11595	0.340236430745821	0.883916815746187	gene-smpdl3b	1	smpdl3b	0	-	1
BP	GO:0015012	heparan sulfate proteoglycan biosynthetic process	1/430	11/11595	0.340236430745821	0.883916815746187	gene-LOC122863823	1	LOC122863823	0	-	1
BP	GO:0016540	protein autoprocessing	1/430	11/11595	0.340236430745821	0.883916815746187	gene-LOC122871823	1	LOC122871823	0	-	1
BP	GO:0018057	peptidyl-lysine oxidation	1/430	11/11595	0.340236430745821	0.883916815746187	gene-loxl3b	1	loxl3b	0	-	1
BP	GO:0018158	protein oxidation	1/430	11/11595	0.340236430745821	0.883916815746187	gene-loxl3b	1	loxl3b	0	-	1
BP	GO:0018209	peptidyl-serine modification	1/430	11/11595	0.340236430745821	0.883916815746187	gene-ndnf	1	ndnf	0	-	1
BP	GO:0021761	limbic system development	1/430	11/11595	0.340236430745821	0.883916815746187	gene-ndnf	1	ndnf	0	-	1
BP	GO:0030514	negative regulation of BMP signaling pathway	1/430	11/11595	0.340236430745821	0.883916815746187	gene-nog2	1	nog2	0	-	1
BP	GO:0031638	zymogen activation	1/430	11/11595	0.340236430745821	0.883916815746187	gene-plat	1	plat	1	gene-plat	0
BP	GO:0032261	purine nucleotide salvage	1/430	11/11595	0.340236430745821	0.883916815746187	gene-ampd3a	1	ampd3a	0	-	1
BP	GO:0032401	establishment of melanosome localization	1/430	11/11595	0.340236430745821	0.883916815746187	gene-LOC122885551	1	LOC122885551	1	gene-LOC122885551	0
BP	GO:0035337	fatty-acyl-CoA metabolic process	1/430	11/11595	0.340236430745821	0.883916815746187	gene-elovl5	1	elovl5	1	gene-elovl5	0
BP	GO:0043627	response to estrogen	1/430	11/11595	0.340236430745821	0.883916815746187	gene-wbp2	1	wbp2	1	gene-wbp2	0
BP	GO:0045214	sarcomere organization	1/430	11/11595	0.340236430745821	0.883916815746187	gene-lrrc39	1	lrrc39	1	gene-lrrc39	0
BP	GO:0048384	retinoic acid receptor signaling pathway	1/430	11/11595	0.340236430745821	0.883916815746187	gene-LOC122864108	1	LOC122864108	1	gene-LOC122864108	0
BP	GO:0051101	regulation of DNA binding	1/430	11/11595	0.340236430745821	0.883916815746187	gene-LOC122877917	1	LOC122877917	1	gene-LOC122877917	0
BP	GO:0051480	regulation of cytosolic calcium ion concentration	1/430	11/11595	0.340236430745821	0.883916815746187	gene-swap70a	1	swap70a	0	-	1
BP	GO:0051905	establishment of pigment granule localization	1/430	11/11595	0.340236430745821	0.883916815746187	gene-LOC122885551	1	LOC122885551	1	gene-LOC122885551	0
BP	GO:0070831	basement membrane assembly	1/430	11/11595	0.340236430745821	0.883916815746187	gene-lamb3	1	lamb3	1	gene-lamb3	0
BP	GO:0072384	organelle transport along microtubule	1/430	11/11595	0.340236430745821	0.883916815746187	gene-LOC122886528	1	LOC122886528	1	gene-LOC122886528	0
BP	GO:0097352	autophagosome maturation	1/430	11/11595	0.340236430745821	0.883916815746187	gene-LOC122886528	1	LOC122886528	1	gene-LOC122886528	0
BP	GO:0097530	granulocyte migration	1/430	11/11595	0.340236430745821	0.883916815746187	gene-LOC122873767	1	LOC122873767	1	gene-LOC122873767	0
BP	GO:1901570	fatty acid derivative biosynthetic process	1/430	11/11595	0.340236430745821	0.883916815746187	gene-elovl5	1	elovl5	1	gene-elovl5	0
BP	GO:1903825	organic acid transmembrane transport	1/430	11/11595	0.340236430745821	0.883916815746187	gene-LOC122871427	1	LOC122871427	1	gene-LOC122871427	0
BP	GO:1905039	carboxylic acid transmembrane transport	1/430	11/11595	0.340236430745821	0.883916815746187	gene-LOC122871427	1	LOC122871427	1	gene-LOC122871427	0
BP	GO:2000736	regulation of stem cell differentiation	1/430	11/11595	0.340236430745821	0.883916815746187	gene-tph2	1	tph2	0	-	1
BP	GO:0009799	specification of symmetry	5/430	104/11595	0.34249867661797	0.883916815746187	gene-skib/gene-znf703/gene-apln/gene-rpgrb/gene-LOC122871826	5	apln/LOC122871826/rpgrb/skib/znf703	1	gene-apln	4
BP	GO:0009855	determination of bilateral symmetry	5/430	104/11595	0.34249867661797	0.883916815746187	gene-skib/gene-znf703/gene-apln/gene-rpgrb/gene-LOC122871826	5	apln/LOC122871826/rpgrb/skib/znf703	1	gene-apln	4
BP	GO:0032271	regulation of protein polymerization	5/430	104/11595	0.34249867661797	0.883916815746187	gene-LOC122885147/gene-fmn2a/gene-LOC122861414/gene-fmn1/gene-eps8a	5	eps8a/fmn1/fmn2a/LOC122861414/LOC122885147	4	gene-eps8a/gene-fmn1/gene-LOC122861414/gene-LOC122885147	1
BP	GO:0048666	neuron development	13/430	305/11595	0.343153751722099	0.883916815746187	gene-LOC122872091/gene-ndnf/gene-LOC122877917/gene-omgb/gene-myot/gene-LOC122888546/gene-pard6gb/gene-tnca/gene-LOC122867164/gene-LOC122869123/gene-si:ch211-278a6.1/gene-mrtfbb/gene-rpgrb	13	LOC122867164/LOC122869123/LOC122872091/LOC122877917/LOC122888546/mrtfbb/myot/ndnf/omgb/pard6gb/rpgrb/si:ch211-278a6.1/tnca	5	gene-LOC122869123/gene-LOC122877917/gene-myot/gene-omgb/gene-si:ch211-278a6.1	8
BP	GO:0051345	positive regulation of hydrolase activity	10/430	229/11595	0.344048403675787	0.883916815746187	gene-arhgap25/gene-sgsm1a/gene-LOC122881737/gene-rasgrp3/gene-asap1a/gene-arhgap24/gene-si:dkey-191m6.4/gene-rundc1/gene-tbc1d14/gene-tbc1d30	10	arhgap24/arhgap25/asap1a/LOC122881737/rasgrp3/rundc1/sgsm1a/si:dkey-191m6.4/tbc1d14/tbc1d30	8	gene-arhgap25/gene-asap1a/gene-rasgrp3/gene-rundc1/gene-sgsm1a/gene-si:dkey-191m6.4/gene-tbc1d14/gene-tbc1d30	2
BP	GO:0001558	regulation of cell growth	3/430	56/11595	0.344480232424343	0.883916815746187	gene-omgb/gene-osgin2/gene-pard6gb	3	omgb/osgin2/pard6gb	2	gene-omgb/gene-osgin2	1
BP	GO:0032273	positive regulation of protein polymerization	3/430	56/11595	0.344480232424343	0.883916815746187	gene-fmn2a/gene-LOC122861414/gene-fmn1	3	fmn1/fmn2a/LOC122861414	2	gene-fmn1/gene-LOC122861414	1
BP	GO:0007346	regulation of mitotic cell cycle	4/430	80/11595	0.345104176851371	0.883916815746187	gene-LOC122877917/gene-LOC122887176/gene-id2a/gene-LOC122865952	4	id2a/LOC122865952/LOC122877917/LOC122887176	1	gene-LOC122877917	3
BP	GO:0014706	striated muscle tissue development	4/430	80/11595	0.345104176851371	0.883916815746187	gene-eya2/gene-lrrc39/gene-pdzph1/gene-mrtfbb	4	eya2/lrrc39/mrtfbb/pdzph1	2	gene-lrrc39/gene-pdzph1	2
BP	GO:0120036	plasma membrane bounded cell projection organization	18/430	434/11595	0.346164632667049	0.883916815746187	gene-LOC122872091/gene-odad3/gene-mtss1la/gene-znf703/gene-vdac3/gene-ndnf/gene-amotl2a/gene-LOC122877917/gene-omgb/gene-myot/gene-LOC122888546/gene-pard6gb/gene-tnca/gene-LOC122867164/gene-LOC122869123/gene-si:ch211-278a6.1/gene-mrtfbb/gene-rpgrb	18	amotl2a/LOC122867164/LOC122869123/LOC122872091/LOC122877917/LOC122888546/mrtfbb/mtss1la/myot/ndnf/odad3/omgb/pard6gb/rpgrb/si:ch211-278a6.1/tnca/vdac3/znf703	6	gene-LOC122869123/gene-LOC122877917/gene-myot/gene-omgb/gene-si:ch211-278a6.1/gene-vdac3	12
BP	GO:0008361	regulation of cell size	2/430	33/11595	0.347556369954158	0.883916815746187	gene-omgb/gene-pard6gb	2	omgb/pard6gb	1	gene-omgb	1
BP	GO:0032869	cellular response to insulin stimulus	2/430	33/11595	0.347556369954158	0.883916815746187	gene-pid1/gene-si:ch73-335l21.1	2	pid1/si:ch73-335l21.1	0	-	2
BP	GO:0072073	kidney epithelium development	2/430	33/11595	0.347556369954158	0.883916815746187	gene-LOC122870658/gene-LOC122865952	2	LOC122865952/LOC122870658	1	gene-LOC122870658	1
BP	GO:0032970	regulation of actin filament-based process	6/430	130/11595	0.351834491087603	0.883916815746187	gene-swap70a/gene-LOC122885147/gene-fmn2a/gene-LOC122861414/gene-fmn1/gene-eps8a	6	eps8a/fmn1/fmn2a/LOC122861414/LOC122885147/swap70a	4	gene-eps8a/gene-fmn1/gene-LOC122861414/gene-LOC122885147	2
BP	GO:0016570	histone modification	4/430	81/11595	0.353600088122882	0.883916815746187	gene-znf703/gene-snai2/gene-gfi1aa/gene-cbx8a	4	cbx8a/gfi1aa/snai2/znf703	1	gene-gfi1aa	3
BP	GO:0010941	regulation of cell death	12/430	282/11595	0.354222078415517	0.883916815746187	gene-LOC122877908/gene-ndnf/gene-LOC122877917/gene-tnfaip8l2b/gene-LOC122881737/gene-osgin2/gene-snai2/gene-angptl4/gene-ripk2/gene-LOC122865536/gene-LOC122868820/gene-phlda1	12	angptl4/LOC122865536/LOC122868820/LOC122877908/LOC122877917/LOC122881737/ndnf/osgin2/phlda1/ripk2/snai2/tnfaip8l2b	5	gene-LOC122865536/gene-LOC122877908/gene-LOC122877917/gene-osgin2/gene-ripk2	7
BP	GO:0040017	positive regulation of locomotion	3/430	57/11595	0.354712047584714	0.883916815746187	gene-swap70a/gene-snai2/gene-LOC122871413	3	LOC122871413/snai2/swap70a	1	gene-LOC122871413	2
BP	GO:0060560	developmental growth involved in morphogenesis	3/430	57/11595	0.354712047584714	0.883916815746187	gene-omgb/gene-pard6gb/gene-tnca	3	omgb/pard6gb/tnca	1	gene-omgb	2
BP	GO:1901615	organic hydroxy compound metabolic process	6/430	131/11595	0.35848346308017	0.883916815746187	gene-tph2/gene-itpkcb/gene-ddc/gene-snai2/gene-nfe2l1a/gene-LOC122871599	6	ddc/itpkcb/LOC122871599/nfe2l1a/snai2/tph2	3	gene-ddc/gene-LOC122871599/gene-nfe2l1a	3
BP	GO:0006082	organic acid metabolic process	16/430	386/11595	0.359489713802698	0.883916815746187	gene-hal/gene-tph2/gene-LOC122876127/gene-LOC122876938/gene-psat1/gene-ddah1/gene-ddc/gene-elovl5/gene-acaca/gene-arg2/gene-lpin1b/gene-LOC122866314/gene-enosf1/gene-LOC122871599/gene-aldh1l2/gene-cbsa	16	acaca/aldh1l2/arg2/cbsa/ddah1/ddc/elovl5/enosf1/hal/LOC122866314/LOC122871599/LOC122876127/LOC122876938/lpin1b/psat1/tph2	14	gene-acaca/gene-aldh1l2/gene-arg2/gene-cbsa/gene-ddc/gene-elovl5/gene-enosf1/gene-hal/gene-LOC122866314/gene-LOC122871599/gene-LOC122876127/gene-LOC122876938/gene-lpin1b/gene-psat1	2
BP	GO:0009156	ribonucleoside monophosphate biosynthetic process	2/430	34/11595	0.361121831136831	0.883916815746187	gene-ampd3a/gene-adss1	2	adss1/ampd3a	1	gene-adss1	1
BP	GO:0051336	regulation of hydrolase activity	12/430	284/11595	0.363235332318103	0.883916815746187	gene-arhgap25/gene-sgsm1a/gene-LOC122877917/gene-zgc:92242/gene-LOC122881737/gene-rasgrp3/gene-asap1a/gene-arhgap24/gene-si:dkey-191m6.4/gene-rundc1/gene-tbc1d14/gene-tbc1d30	12	arhgap24/arhgap25/asap1a/LOC122877917/LOC122881737/rasgrp3/rundc1/sgsm1a/si:dkey-191m6.4/tbc1d14/tbc1d30/zgc:92242	10	gene-arhgap25/gene-asap1a/gene-LOC122877917/gene-rasgrp3/gene-rundc1/gene-sgsm1a/gene-si:dkey-191m6.4/gene-tbc1d14/gene-tbc1d30/gene-zgc:92242	2
BP	GO:0003205	cardiac chamber development	1/430	12/11595	0.364726963789614	0.883916815746187	gene-cadm4	1	cadm4	1	gene-cadm4	0
BP	GO:0007205	protein kinase C-activating G protein-coupled receptor signaling pathway	1/430	12/11595	0.364726963789614	0.883916815746187	gene-si:dkey-172j4.3	1	si:dkey-172j4.3	1	gene-si:dkey-172j4.3	0
BP	GO:0009791	post-embryonic development	1/430	12/11595	0.364726963789614	0.883916815746187	gene-LOC122877917	1	LOC122877917	1	gene-LOC122877917	0
BP	GO:0010950	positive regulation of endopeptidase activity	1/430	12/11595	0.364726963789614	0.883916815746187	gene-LOC122881737	1	LOC122881737	0	-	1
BP	GO:0010952	positive regulation of peptidase activity	1/430	12/11595	0.364726963789614	0.883916815746187	gene-LOC122881737	1	LOC122881737	0	-	1
BP	GO:0016241	regulation of macroautophagy	1/430	12/11595	0.364726963789614	0.883916815746187	gene-LOC122886528	1	LOC122886528	1	gene-LOC122886528	0
BP	GO:0021903	rostrocaudal neural tube patterning	1/430	12/11595	0.364726963789614	0.883916815746187	gene-grhl2b	1	grhl2b	1	gene-grhl2b	0
BP	GO:0030201	heparan sulfate proteoglycan metabolic process	1/430	12/11595	0.364726963789614	0.883916815746187	gene-LOC122863823	1	LOC122863823	0	-	1
BP	GO:0031060	regulation of histone methylation	1/430	12/11595	0.364726963789614	0.883916815746187	gene-gfi1aa	1	gfi1aa	1	gene-gfi1aa	0
BP	GO:0032400	melanosome localization	1/430	12/11595	0.364726963789614	0.883916815746187	gene-LOC122885551	1	LOC122885551	1	gene-LOC122885551	0
BP	GO:0040001	establishment of mitotic spindle localization	1/430	12/11595	0.364726963789614	0.883916815746187	gene-sapcd1	1	sapcd1	1	gene-sapcd1	0
BP	GO:0043500	muscle adaptation	1/430	12/11595	0.364726963789614	0.883916815746187	gene-LOC122877917	1	LOC122877917	1	gene-LOC122877917	0
BP	GO:0043524	negative regulation of neuron apoptotic process	1/430	12/11595	0.364726963789614	0.883916815746187	gene-ndnf	1	ndnf	0	-	1
BP	GO:0045739	positive regulation of DNA repair	1/430	12/11595	0.364726963789614	0.883916815746187	gene-cbx8a	1	cbx8a	0	-	1
BP	GO:0046847	filopodium assembly	1/430	12/11595	0.364726963789614	0.883916815746187	gene-amotl2a	1	amotl2a	0	-	1
BP	GO:0048013	ephrin receptor signaling pathway	1/430	12/11595	0.364726963789614	0.883916815746187	gene-efna1a	1	efna1a	1	gene-efna1a	0
BP	GO:0050730	regulation of peptidyl-tyrosine phosphorylation	1/430	12/11595	0.364726963789614	0.883916815746187	gene-dok7b	1	dok7b	0	-	1
BP	GO:0050873	brown fat cell differentiation	1/430	12/11595	0.364726963789614	0.883916815746187	gene-lamb3	1	lamb3	1	gene-lamb3	0
BP	GO:0051293	establishment of spindle localization	1/430	12/11595	0.364726963789614	0.883916815746187	gene-sapcd1	1	sapcd1	1	gene-sapcd1	0
BP	GO:0051653	spindle localization	1/430	12/11595	0.364726963789614	0.883916815746187	gene-sapcd1	1	sapcd1	1	gene-sapcd1	0
BP	GO:0051875	pigment granule localization	1/430	12/11595	0.364726963789614	0.883916815746187	gene-LOC122885551	1	LOC122885551	1	gene-LOC122885551	0
BP	GO:0071711	basement membrane organization	1/430	12/11595	0.364726963789614	0.883916815746187	gene-lamb3	1	lamb3	1	gene-lamb3	0
BP	GO:1901019	regulation of calcium ion transmembrane transporter activity	1/430	12/11595	0.364726963789614	0.883916815746187	gene-gem	1	gem	1	gene-gem	0
BP	GO:1901796	regulation of signal transduction by p53 class mediator	1/430	12/11595	0.364726963789614	0.883916815746187	gene-snai2	1	snai2	0	-	1
BP	GO:2001021	negative regulation of response to DNA damage stimulus	1/430	12/11595	0.364726963789614	0.883916815746187	gene-snai2	1	snai2	0	-	1
BP	GO:2001056	positive regulation of cysteine-type endopeptidase activity	1/430	12/11595	0.364726963789614	0.883916815746187	gene-LOC122881737	1	LOC122881737	0	-	1
BP	GO:0044270	cellular nitrogen compound catabolic process	6/430	132/11595	0.365140610128853	0.883916815746187	gene-dut/gene-LOC122872164/gene-gda/gene-pde4ba/gene-hmox1a/gene-aldh1l2	6	aldh1l2/dut/gda/hmox1a/LOC122872164/pde4ba	4	gene-aldh1l2/gene-gda/gene-hmox1a/gene-LOC122872164	2
BP	GO:0046700	heterocycle catabolic process	6/430	132/11595	0.365140610128853	0.883916815746187	gene-dut/gene-LOC122872164/gene-gda/gene-pde4ba/gene-hmox1a/gene-aldh1l2	6	aldh1l2/dut/gda/hmox1a/LOC122872164/pde4ba	4	gene-aldh1l2/gene-gda/gene-hmox1a/gene-LOC122872164	2
BP	GO:0007033	vacuole organization	2/430	35/11595	0.374580941305522	0.883916815746187	gene-rab32a/gene-tbc1d14	2	rab32a/tbc1d14	2	gene-rab32a/gene-tbc1d14	0
BP	GO:0007602	phototransduction	2/430	35/11595	0.374580941305522	0.883916815746187	gene-LOC122887291/gene-parapinopsina	2	LOC122887291/parapinopsina	2	gene-LOC122887291/gene-parapinopsina	0
BP	GO:0009141	nucleoside triphosphate metabolic process	2/430	35/11595	0.374580941305522	0.883916815746187	gene-dut/gene-cmpk2	2	cmpk2/dut	1	gene-cmpk2	1
BP	GO:0030509	BMP signaling pathway	2/430	35/11595	0.374580941305522	0.883916815746187	gene-id2a/gene-nog2	2	id2a/nog2	0	-	2
BP	GO:0071772	response to BMP	2/430	35/11595	0.374580941305522	0.883916815746187	gene-id2a/gene-nog2	2	id2a/nog2	0	-	2
BP	GO:0071773	cellular response to BMP stimulus	2/430	35/11595	0.374580941305522	0.883916815746187	gene-id2a/gene-nog2	2	id2a/nog2	0	-	2
BP	GO:0072006	nephron development	2/430	35/11595	0.374580941305522	0.883916815746187	gene-LOC122870658/gene-LOC122865952	2	LOC122865952/LOC122870658	1	gene-LOC122870658	1
BP	GO:1901991	negative regulation of mitotic cell cycle phase transition	2/430	35/11595	0.374580941305522	0.883916815746187	gene-LOC122877917/gene-LOC122865952	2	LOC122865952/LOC122877917	1	gene-LOC122877917	1
BP	GO:0009150	purine ribonucleotide metabolic process	7/430	159/11595	0.376580952219993	0.883916815746187	gene-ampd3a/gene-LOC122872164/gene-pde4ba/gene-elovl5/gene-acaca/gene-adss1/gene-LOC122869764	7	acaca/adss1/ampd3a/elovl5/LOC122869764/LOC122872164/pde4ba	5	gene-acaca/gene-adss1/gene-elovl5/gene-LOC122869764/gene-LOC122872164	2
BP	GO:0043547	positive regulation of GTPase activity	9/430	210/11595	0.376957628569568	0.883916815746187	gene-arhgap25/gene-sgsm1a/gene-rasgrp3/gene-asap1a/gene-arhgap24/gene-si:dkey-191m6.4/gene-rundc1/gene-tbc1d14/gene-tbc1d30	9	arhgap24/arhgap25/asap1a/rasgrp3/rundc1/sgsm1a/si:dkey-191m6.4/tbc1d14/tbc1d30	8	gene-arhgap25/gene-asap1a/gene-rasgrp3/gene-rundc1/gene-sgsm1a/gene-si:dkey-191m6.4/gene-tbc1d14/gene-tbc1d30	1
BP	GO:1902903	regulation of supramolecular fiber organization	6/430	134/11595	0.378471392750933	0.883916815746187	gene-swap70a/gene-LOC122885147/gene-fmn2a/gene-LOC122861414/gene-fmn1/gene-eps8a	6	eps8a/fmn1/fmn2a/LOC122861414/LOC122885147/swap70a	4	gene-eps8a/gene-fmn1/gene-LOC122861414/gene-LOC122885147	2
BP	GO:0016569	covalent chromatin modification	4/430	84/11595	0.379073921248899	0.883916815746187	gene-znf703/gene-snai2/gene-gfi1aa/gene-cbx8a	4	cbx8a/gfi1aa/snai2/znf703	1	gene-gfi1aa	3
BP	GO:0000904	cell morphogenesis involved in differentiation	8/430	185/11595	0.37990979475578	0.883916815746187	gene-lamb3/gene-LOC122872091/gene-omgb/gene-myot/gene-LOC122888546/gene-pard6gb/gene-LOC122869123/gene-si:ch211-278a6.1	8	lamb3/LOC122869123/LOC122872091/LOC122888546/myot/omgb/pard6gb/si:ch211-278a6.1	5	gene-lamb3/gene-LOC122869123/gene-myot/gene-omgb/gene-si:ch211-278a6.1	3
BP	GO:0032270	positive regulation of cellular protein metabolic process	7/430	160/11595	0.382688667291601	0.883916815746187	gene-dok7b/gene-znf703/gene-LOC122877917/gene-LOC122881737/gene-snai2/gene-LOC122886518/gene-LOC122871413	7	dok7b/LOC122871413/LOC122877917/LOC122881737/LOC122886518/snai2/znf703	3	gene-LOC122871413/gene-LOC122877917/gene-LOC122886518	4
BP	GO:0019752	carboxylic acid metabolic process	15/430	366/11595	0.382732033634169	0.883916815746187	gene-hal/gene-LOC122876127/gene-LOC122876938/gene-psat1/gene-ddah1/gene-ddc/gene-elovl5/gene-acaca/gene-arg2/gene-lpin1b/gene-LOC122866314/gene-enosf1/gene-LOC122871599/gene-aldh1l2/gene-cbsa	15	acaca/aldh1l2/arg2/cbsa/ddah1/ddc/elovl5/enosf1/hal/LOC122866314/LOC122871599/LOC122876127/LOC122876938/lpin1b/psat1	14	gene-acaca/gene-aldh1l2/gene-arg2/gene-cbsa/gene-ddc/gene-elovl5/gene-enosf1/gene-hal/gene-LOC122866314/gene-LOC122871599/gene-LOC122876127/gene-LOC122876938/gene-lpin1b/gene-psat1	1
BP	GO:0010563	negative regulation of phosphorus metabolic process	3/430	60/11595	0.385260063701748	0.883916815746187	gene-swap70a/gene-zgc:92242/gene-LOC122886518	3	LOC122886518/swap70a/zgc:92242	2	gene-LOC122886518/gene-zgc:92242	1
BP	GO:0043244	regulation of protein-containing complex disassembly	3/430	60/11595	0.385260063701748	0.883916815746187	gene-swap70a/gene-LOC122886528/gene-eps8a	3	eps8a/LOC122886528/swap70a	2	gene-eps8a/gene-LOC122886528	1
BP	GO:0045936	negative regulation of phosphate metabolic process	3/430	60/11595	0.385260063701748	0.883916815746187	gene-swap70a/gene-zgc:92242/gene-LOC122886518	3	LOC122886518/swap70a/zgc:92242	2	gene-LOC122886518/gene-zgc:92242	1
BP	GO:0051261	protein depolymerization	3/430	60/11595	0.385260063701748	0.883916815746187	gene-swap70a/gene-LOC122871423/gene-eps8a	3	eps8a/LOC122871423/swap70a	2	gene-eps8a/gene-LOC122871423	1
BP	GO:0045892	negative regulation of transcription, DNA-templated	8/430	186/11595	0.385579144508563	0.883916815746187	gene-znf703/gene-LOC122877917/gene-snai2/gene-id2a/gene-jazf1a/gene-LOC122865952/gene-cbx4/gene-cbx8a	8	cbx4/cbx8a/id2a/jazf1a/LOC122865952/LOC122877917/snai2/znf703	1	gene-LOC122877917	7
BP	GO:0001822	kidney development	4/430	85/11595	0.38754753745822	0.883916815746187	gene-LOC122870658/gene-cxadr/gene-pard6gb/gene-LOC122865952	4	cxadr/LOC122865952/LOC122870658/pard6gb	2	gene-cxadr/gene-LOC122870658	2
BP	GO:0072001	renal system development	4/430	85/11595	0.38754753745822	0.883916815746187	gene-LOC122870658/gene-cxadr/gene-pard6gb/gene-LOC122865952	4	cxadr/LOC122865952/LOC122870658/pard6gb	2	gene-cxadr/gene-LOC122870658	2
BP	GO:0010001	glial cell differentiation	2/430	36/11595	0.387922938313271	0.883916815746187	gene-omgb/gene-ndrg1a	2	ndrg1a/omgb	2	gene-ndrg1a/gene-omgb	0
BP	GO:0021915	neural tube development	2/430	36/11595	0.387922938313271	0.883916815746187	gene-grhl2b/gene-pard6gb	2	grhl2b/pard6gb	1	gene-grhl2b	1
BP	GO:0030835	negative regulation of actin filament depolymerization	2/430	36/11595	0.387922938313271	0.883916815746187	gene-swap70a/gene-eps8a	2	eps8a/swap70a	1	gene-eps8a	1
BP	GO:0051650	establishment of vesicle localization	2/430	36/11595	0.387922938313271	0.883916815746187	gene-LOC122885551/gene-LOC122886528	2	LOC122885551/LOC122886528	2	gene-LOC122885551/gene-LOC122886528	0
BP	GO:1901988	negative regulation of cell cycle phase transition	2/430	36/11595	0.387922938313271	0.883916815746187	gene-LOC122877917/gene-LOC122865952	2	LOC122865952/LOC122877917	1	gene-LOC122877917	1
BP	GO:1902105	regulation of leukocyte differentiation	2/430	36/11595	0.387922938313271	0.883916815746187	gene-zbtb46/gene-lrrc17	2	lrrc17/zbtb46	0	-	2
BP	GO:0000038	very long-chain fatty acid metabolic process	1/430	13/11595	0.388310440054007	0.883916815746187	gene-elovl5	1	elovl5	1	gene-elovl5	0
BP	GO:0001649	osteoblast differentiation	1/430	13/11595	0.388310440054007	0.883916815746187	gene-snai2	1	snai2	0	-	1
BP	GO:0003401	axis elongation	1/430	13/11595	0.388310440054007	0.883916815746187	gene-tnca	1	tnca	0	-	1
BP	GO:0006188	IMP biosynthetic process	1/430	13/11595	0.388310440054007	0.883916815746187	gene-ampd3a	1	ampd3a	0	-	1
BP	GO:0009067	aspartate family amino acid biosynthetic process	1/430	13/11595	0.388310440054007	0.883916815746187	gene-LOC122876938	1	LOC122876938	1	gene-LOC122876938	0
BP	GO:0009309	amine biosynthetic process	1/430	13/11595	0.388310440054007	0.883916815746187	gene-ddc	1	ddc	1	gene-ddc	0
BP	GO:0010507	negative regulation of autophagy	1/430	13/11595	0.388310440054007	0.883916815746187	gene-tbc1d14	1	tbc1d14	1	gene-tbc1d14	0
BP	GO:0010508	positive regulation of autophagy	1/430	13/11595	0.388310440054007	0.883916815746187	gene-LOC122886528	1	LOC122886528	1	gene-LOC122886528	0
BP	GO:0010842	retina layer formation	1/430	13/11595	0.388310440054007	0.883916815746187	gene-rpgrb	1	rpgrb	0	-	1
BP	GO:0042401	cellular biogenic amine biosynthetic process	1/430	13/11595	0.388310440054007	0.883916815746187	gene-ddc	1	ddc	1	gene-ddc	0
BP	GO:0042462	eye photoreceptor cell development	1/430	13/11595	0.388310440054007	0.883916815746187	gene-rpgrb	1	rpgrb	0	-	1
BP	GO:0043243	positive regulation of protein-containing complex disassembly	1/430	13/11595	0.388310440054007	0.883916815746187	gene-LOC122886528	1	LOC122886528	1	gene-LOC122886528	0
BP	GO:0045861	negative regulation of proteolysis	1/430	13/11595	0.388310440054007	0.883916815746187	gene-LOC122877917	1	LOC122877917	1	gene-LOC122877917	0
BP	GO:0046040	IMP metabolic process	1/430	13/11595	0.388310440054007	0.883916815746187	gene-ampd3a	1	ampd3a	0	-	1
BP	GO:0048546	digestive tract morphogenesis	1/430	13/11595	0.388310440054007	0.883916815746187	gene-pard6gb	1	pard6gb	0	-	1
BP	GO:0072089	stem cell proliferation	1/430	13/11595	0.388310440054007	0.883916815746187	gene-snai2	1	snai2	0	-	1
BP	GO:0099175	regulation of postsynapse organization	1/430	13/11595	0.388310440054007	0.883916815746187	gene-si:ch211-278a6.1	1	si:ch211-278a6.1	1	gene-si:ch211-278a6.1	0
BP	GO:1901568	fatty acid derivative metabolic process	1/430	13/11595	0.388310440054007	0.883916815746187	gene-elovl5	1	elovl5	1	gene-elovl5	0
BP	GO:1903035	negative regulation of response to wounding	1/430	13/11595	0.388310440054007	0.883916815746187	gene-tafa5a	1	tafa5a	0	-	1
BP	GO:0019439	aromatic compound catabolic process	6/430	136/11595	0.391811023779559	0.883916815746187	gene-dut/gene-LOC122872164/gene-gda/gene-pde4ba/gene-hmox1a/gene-aldh1l2	6	aldh1l2/dut/gda/hmox1a/LOC122872164/pde4ba	4	gene-aldh1l2/gene-gda/gene-hmox1a/gene-LOC122872164	2
BP	GO:0045595	regulation of cell differentiation	9/430	213/11595	0.392898826997142	0.883916815746187	gene-tph2/gene-LOC122877917/gene-zbtb46/gene-snai2/gene-LOC122887176/gene-id2a/gene-nfkbiaa/gene-nog2/gene-lrrc17	9	id2a/LOC122877917/LOC122887176/lrrc17/nfkbiaa/nog2/snai2/tph2/zbtb46	2	gene-LOC122877917/gene-nfkbiaa	7
BP	GO:0014066	regulation of phosphatidylinositol 3-kinase signaling	3/430	61/11595	0.395373226591581	0.883916815746187	gene-LOC122877917/gene-LOC122869242/gene-LOC122871413	3	LOC122869242/LOC122871413/LOC122877917	3	gene-LOC122869242/gene-LOC122871413/gene-LOC122877917	0
BP	GO:0031334	positive regulation of protein-containing complex assembly	3/430	61/11595	0.395373226591581	0.883916815746187	gene-fmn2a/gene-LOC122861414/gene-fmn1	3	fmn1/fmn2a/LOC122861414	2	gene-fmn1/gene-LOC122861414	1
BP	GO:0072330	monocarboxylic acid biosynthetic process	3/430	61/11595	0.395373226591581	0.883916815746187	gene-elovl5/gene-acaca/gene-LOC122871599	3	acaca/elovl5/LOC122871599	3	gene-acaca/gene-elovl5/gene-LOC122871599	0
BP	GO:0042692	muscle cell differentiation	4/430	86/11595	0.396006070627097	0.883916815746187	gene-lrrc39/gene-myofl/gene-pdzph1/gene-mrtfbb	4	lrrc39/mrtfbb/myofl/pdzph1	2	gene-lrrc39/gene-pdzph1	2
BP	GO:0060537	muscle tissue development	4/430	86/11595	0.396006070627097	0.883916815746187	gene-eya2/gene-lrrc39/gene-pdzph1/gene-mrtfbb	4	eya2/lrrc39/mrtfbb/pdzph1	2	gene-lrrc39/gene-pdzph1	2
BP	GO:1902679	negative regulation of RNA biosynthetic process	8/430	188/11595	0.396928058554199	0.883916815746187	gene-znf703/gene-LOC122877917/gene-snai2/gene-id2a/gene-jazf1a/gene-LOC122865952/gene-cbx4/gene-cbx8a	8	cbx4/cbx8a/id2a/jazf1a/LOC122865952/LOC122877917/snai2/znf703	1	gene-LOC122877917	7
BP	GO:1903507	negative regulation of nucleic acid-templated transcription	8/430	188/11595	0.396928058554199	0.883916815746187	gene-znf703/gene-LOC122877917/gene-snai2/gene-id2a/gene-jazf1a/gene-LOC122865952/gene-cbx4/gene-cbx8a	8	cbx4/cbx8a/id2a/jazf1a/LOC122865952/LOC122877917/snai2/znf703	1	gene-LOC122877917	7
BP	GO:0043436	oxoacid metabolic process	15/430	370/11595	0.398926746345865	0.883916815746187	gene-hal/gene-LOC122876127/gene-LOC122876938/gene-psat1/gene-ddah1/gene-ddc/gene-elovl5/gene-acaca/gene-arg2/gene-lpin1b/gene-LOC122866314/gene-enosf1/gene-LOC122871599/gene-aldh1l2/gene-cbsa	15	acaca/aldh1l2/arg2/cbsa/ddah1/ddc/elovl5/enosf1/hal/LOC122866314/LOC122871599/LOC122876127/LOC122876938/lpin1b/psat1	14	gene-acaca/gene-aldh1l2/gene-arg2/gene-cbsa/gene-ddc/gene-elovl5/gene-enosf1/gene-hal/gene-LOC122866314/gene-LOC122871599/gene-LOC122876127/gene-LOC122876938/gene-lpin1b/gene-psat1	1
BP	GO:0002460	adaptive immune response based on somatic recombination of immune receptors built from immunoglobulin superfamily domains	2/430	37/11595	0.401138000597346	0.883916815746187	gene-swap70a/gene-LOC122870587	2	LOC122870587/swap70a	1	gene-LOC122870587	1
BP	GO:0007009	plasma membrane organization	2/430	37/11595	0.401138000597346	0.883916815746187	gene-mtss1la/gene-ndrg1a	2	mtss1la/ndrg1a	1	gene-ndrg1a	1
BP	GO:0009161	ribonucleoside monophosphate metabolic process	2/430	37/11595	0.401138000597346	0.883916815746187	gene-ampd3a/gene-adss1	2	adss1/ampd3a	1	gene-adss1	1
BP	GO:0030834	regulation of actin filament depolymerization	2/430	37/11595	0.401138000597346	0.883916815746187	gene-swap70a/gene-eps8a	2	eps8a/swap70a	1	gene-eps8a	1
BP	GO:0042310	vasoconstriction	2/430	37/11595	0.401138000597346	0.883916815746187	gene-LOC122863516/gene-edn1	2	edn1/LOC122863516	0	-	2
BP	GO:0042440	pigment metabolic process	2/430	37/11595	0.401138000597346	0.883916815746187	gene-flvcr1/gene-hmox1a	2	flvcr1/hmox1a	2	gene-flvcr1/gene-hmox1a	0
BP	GO:0046530	photoreceptor cell differentiation	2/430	37/11595	0.401138000597346	0.883916815746187	gene-id2a/gene-rpgrb	2	id2a/rpgrb	0	-	2
BP	GO:0051648	vesicle localization	2/430	37/11595	0.401138000597346	0.883916815746187	gene-LOC122885551/gene-LOC122886528	2	LOC122885551/LOC122886528	2	gene-LOC122885551/gene-LOC122886528	0
BP	GO:1901698	response to nitrogen compound	5/430	112/11595	0.401784966635566	0.883916815746187	gene-LOC122864683/gene-LOC122878212/gene-LOC122877917/gene-pid1/gene-si:ch73-335l21.1	5	LOC122864683/LOC122877917/LOC122878212/pid1/si:ch73-335l21.1	3	gene-LOC122864683/gene-LOC122877917/gene-LOC122878212	2
BP	GO:0007369	gastrulation	4/430	87/11595	0.404445928996207	0.883916815746187	gene-snai1a/gene-LOC122877917/gene-apln/gene-LOC122871826	4	apln/LOC122871826/LOC122877917/snai1a	2	gene-apln/gene-LOC122877917	2
BP	GO:0030182	neuron differentiation	15/430	372/11595	0.407047795666521	0.883916815746187	gene-LOC122872091/gene-ndnf/gene-LOC122877917/gene-omgb/gene-myot/gene-LOC122887176/gene-LOC122888546/gene-id2a/gene-pard6gb/gene-tnca/gene-LOC122867164/gene-LOC122869123/gene-si:ch211-278a6.1/gene-mrtfbb/gene-rpgrb	15	id2a/LOC122867164/LOC122869123/LOC122872091/LOC122877917/LOC122887176/LOC122888546/mrtfbb/myot/ndnf/omgb/pard6gb/rpgrb/si:ch211-278a6.1/tnca	5	gene-LOC122869123/gene-LOC122877917/gene-myot/gene-omgb/gene-si:ch211-278a6.1	10
BP	GO:0006163	purine nucleotide metabolic process	7/430	164/11595	0.407136889916639	0.883916815746187	gene-ampd3a/gene-LOC122872164/gene-pde4ba/gene-elovl5/gene-acaca/gene-adss1/gene-LOC122869764	7	acaca/adss1/ampd3a/elovl5/LOC122869764/LOC122872164/pde4ba	5	gene-acaca/gene-adss1/gene-elovl5/gene-LOC122869764/gene-LOC122872164	2
BP	GO:0001736	establishment of planar polarity	1/430	14/11595	0.411020378819054	0.883916815746187	gene-sapcd1	1	sapcd1	1	gene-sapcd1	0
BP	GO:0001824	blastocyst development	1/430	14/11595	0.411020378819054	0.883916815746187	gene-LOC122877917	1	LOC122877917	1	gene-LOC122877917	0
BP	GO:0006171	cAMP biosynthetic process	1/430	14/11595	0.411020378819054	0.883916815746187	gene-LOC122869764	1	LOC122869764	1	gene-LOC122869764	0
BP	GO:0007164	establishment of tissue polarity	1/430	14/11595	0.411020378819054	0.883916815746187	gene-sapcd1	1	sapcd1	1	gene-sapcd1	0
BP	GO:0007586	digestion	1/430	14/11595	0.411020378819054	0.883916815746187	gene-ucn3l	1	ucn3l	1	gene-ucn3l	0
BP	GO:0009148	pyrimidine nucleoside triphosphate biosynthetic process	1/430	14/11595	0.411020378819054	0.883916815746187	gene-cmpk2	1	cmpk2	1	gene-cmpk2	0
BP	GO:0009755	hormone-mediated signaling pathway	1/430	14/11595	0.411020378819054	0.883916815746187	gene-LOC122865952	1	LOC122865952	0	-	1
BP	GO:0009880	embryonic pattern specification	1/430	14/11595	0.411020378819054	0.883916815746187	gene-amotl2a	1	amotl2a	0	-	1
BP	GO:0009950	dorsal/ventral axis specification	1/430	14/11595	0.411020378819054	0.883916815746187	gene-caprin2	1	caprin2	1	gene-caprin2	0
BP	GO:0030166	proteoglycan biosynthetic process	1/430	14/11595	0.411020378819054	0.883916815746187	gene-LOC122863823	1	LOC122863823	0	-	1
BP	GO:0043101	purine-containing compound salvage	1/430	14/11595	0.411020378819054	0.883916815746187	gene-ampd3a	1	ampd3a	0	-	1
BP	GO:0045600	positive regulation of fat cell differentiation	1/430	14/11595	0.411020378819054	0.883916815746187	gene-snai2	1	snai2	0	-	1
BP	GO:0052652	cyclic purine nucleotide metabolic process	1/430	14/11595	0.411020378819054	0.883916815746187	gene-LOC122869764	1	LOC122869764	1	gene-LOC122869764	0
BP	GO:0060759	regulation of response to cytokine stimulus	1/430	14/11595	0.411020378819054	0.883916815746187	gene-LOC122877917	1	LOC122877917	1	gene-LOC122877917	0
BP	GO:0099518	vesicle cytoskeletal trafficking	1/430	14/11595	0.411020378819054	0.883916815746187	gene-LOC122886528	1	LOC122886528	1	gene-LOC122886528	0
BP	GO:0051094	positive regulation of developmental process	6/430	139/11595	0.411803551156777	0.883916815746187	gene-LOC122877917/gene-zbtb46/gene-snai2/gene-LOC122887176/gene-mrtfbb/gene-caprin2	6	caprin2/LOC122877917/LOC122887176/mrtfbb/snai2/zbtb46	2	gene-caprin2/gene-LOC122877917	4
BP	GO:0001667	ameboidal-type cell migration	4/430	88/11595	0.412863628493909	0.883916815746187	gene-snai1a/gene-LOC122877917/gene-apln/gene-snai2	4	apln/LOC122877917/snai1a/snai2	2	gene-apln/gene-LOC122877917	2
BP	GO:0051247	positive regulation of protein metabolic process	7/430	165/11595	0.413245929143927	0.883916815746187	gene-dok7b/gene-znf703/gene-LOC122877917/gene-LOC122881737/gene-snai2/gene-LOC122886518/gene-LOC122871413	7	dok7b/LOC122871413/LOC122877917/LOC122881737/LOC122886518/snai2/znf703	3	gene-LOC122871413/gene-LOC122877917/gene-LOC122886518	4
BP	GO:0016236	macroautophagy	2/430	38/11595	0.414217192497148	0.883916815746187	gene-LOC122886528/gene-tbc1d14	2	LOC122886528/tbc1d14	2	gene-LOC122886528/gene-tbc1d14	0
BP	GO:0019216	regulation of lipid metabolic process	2/430	38/11595	0.414217192497148	0.883916815746187	gene-ddit3/gene-snai2	2	ddit3/snai2	1	gene-ddit3	1
BP	GO:0032868	response to insulin	2/430	38/11595	0.414217192497148	0.883916815746187	gene-pid1/gene-si:ch73-335l21.1	2	pid1/si:ch73-335l21.1	0	-	2
BP	GO:0045664	regulation of neuron differentiation	2/430	38/11595	0.414217192497148	0.883916815746187	gene-LOC122887176/gene-id2a	2	id2a/LOC122887176	0	-	2
BP	GO:0003002	regionalization	5/430	114/11595	0.416558364841677	0.883916815746187	gene-skib/gene-snai1a/gene-grhl2b/gene-LOC122869123/gene-caprin2	5	caprin2/grhl2b/LOC122869123/skib/snai1a	3	gene-caprin2/gene-grhl2b/gene-LOC122869123	2
BP	GO:1901361	organic cyclic compound catabolic process	6/430	141/11595	0.425099064779554	0.883916815746187	gene-dut/gene-LOC122872164/gene-gda/gene-pde4ba/gene-hmox1a/gene-aldh1l2	6	aldh1l2/dut/gda/hmox1a/LOC122872164/pde4ba	4	gene-aldh1l2/gene-gda/gene-hmox1a/gene-LOC122872164	2
BP	GO:0051253	negative regulation of RNA metabolic process	8/430	193/11595	0.425304581049196	0.883916815746187	gene-znf703/gene-LOC122877917/gene-snai2/gene-id2a/gene-jazf1a/gene-LOC122865952/gene-cbx4/gene-cbx8a	8	cbx4/cbx8a/id2a/jazf1a/LOC122865952/LOC122877917/snai2/znf703	1	gene-LOC122877917	7
BP	GO:0006979	response to oxidative stress	3/430	64/11595	0.425426071242517	0.883916815746187	gene-LOC122877917/gene-cbx8a/gene-nfe2l1a	3	cbx8a/LOC122877917/nfe2l1a	2	gene-LOC122877917/gene-nfe2l1a	1
BP	GO:0018298	protein-chromophore linkage	2/430	39/11595	0.427152412319019	0.883916815746187	gene-LOC122887291/gene-parapinopsina	2	LOC122887291/parapinopsina	2	gene-LOC122887291/gene-parapinopsina	0
BP	GO:1902115	regulation of organelle assembly	2/430	39/11595	0.427152412319019	0.883916815746187	gene-vdac3/gene-tbc1d14	2	tbc1d14/vdac3	2	gene-tbc1d14/gene-vdac3	0
BP	GO:0001738	morphogenesis of a polarized epithelium	1/430	15/11595	0.432889063484265	0.883916815746187	gene-sapcd1	1	sapcd1	1	gene-sapcd1	0
BP	GO:0002285	lymphocyte activation involved in immune response	1/430	15/11595	0.432889063484265	0.883916815746187	gene-swap70a	1	swap70a	0	-	1
BP	GO:0007528	neuromuscular junction development	1/430	15/11595	0.432889063484265	0.883916815746187	gene-tnca	1	tnca	0	-	1
BP	GO:0010976	positive regulation of neuron projection development	1/430	15/11595	0.432889063484265	0.883916815746187	gene-ndnf	1	ndnf	0	-	1
BP	GO:0021532	neural tube patterning	1/430	15/11595	0.432889063484265	0.883916815746187	gene-grhl2b	1	grhl2b	1	gene-grhl2b	0
BP	GO:0021879	forebrain neuron differentiation	1/430	15/11595	0.432889063484265	0.883916815746187	gene-ndnf	1	ndnf	0	-	1
BP	GO:0032231	regulation of actin filament bundle assembly	1/430	15/11595	0.432889063484265	0.883916815746187	gene-swap70a	1	swap70a	0	-	1
BP	GO:0032456	endocytic recycling	1/430	15/11595	0.432889063484265	0.883916815746187	gene-LOC122872091	1	LOC122872091	0	-	1
BP	GO:0042219	cellular modified amino acid catabolic process	1/430	15/11595	0.432889063484265	0.883916815746187	gene-aldh1l2	1	aldh1l2	1	gene-aldh1l2	0
BP	GO:0042430	indole-containing compound metabolic process	1/430	15/11595	0.432889063484265	0.883916815746187	gene-tph2	1	tph2	0	-	1
BP	GO:0042446	hormone biosynthetic process	1/430	15/11595	0.432889063484265	0.883916815746187	gene-dio1	1	dio1	0	-	1
BP	GO:0043954	cellular component maintenance	1/430	15/11595	0.432889063484265	0.883916815746187	gene-pdzph1	1	pdzph1	1	gene-pdzph1	0
BP	GO:0045766	positive regulation of angiogenesis	1/430	15/11595	0.432889063484265	0.883916815746187	gene-LOC122877917	1	LOC122877917	1	gene-LOC122877917	0
BP	GO:0048709	oligodendrocyte differentiation	1/430	15/11595	0.432889063484265	0.883916815746187	gene-omgb	1	omgb	1	gene-omgb	0
BP	GO:0051262	protein tetramerization	1/430	15/11595	0.432889063484265	0.883916815746187	gene-trpm6	1	trpm6	0	-	1
BP	GO:0060219	camera-type eye photoreceptor cell differentiation	1/430	15/11595	0.432889063484265	0.883916815746187	gene-rpgrb	1	rpgrb	0	-	1
BP	GO:0060997	dendritic spine morphogenesis	1/430	15/11595	0.432889063484265	0.883916815746187	gene-si:ch211-278a6.1	1	si:ch211-278a6.1	1	gene-si:ch211-278a6.1	0
BP	GO:0061041	regulation of wound healing	1/430	15/11595	0.432889063484265	0.883916815746187	gene-tafa5a	1	tafa5a	0	-	1
BP	GO:1903038	negative regulation of leukocyte cell-cell adhesion	1/430	15/11595	0.432889063484265	0.883916815746187	gene-LOC122877917	1	LOC122877917	1	gene-LOC122877917	0
BP	GO:1903828	negative regulation of cellular protein localization	1/430	15/11595	0.432889063484265	0.883916815746187	gene-sapcd1	1	sapcd1	1	gene-sapcd1	0
BP	GO:1904018	positive regulation of vasculature development	1/430	15/11595	0.432889063484265	0.883916815746187	gene-LOC122877917	1	LOC122877917	1	gene-LOC122877917	0
BP	GO:2000278	regulation of DNA biosynthetic process	1/430	15/11595	0.432889063484265	0.883916815746187	gene-LOC122877917	1	LOC122877917	1	gene-LOC122877917	0
BP	GO:0055086	nucleobase-containing small molecule metabolic process	11/430	273/11595	0.432902820547287	0.883916815746187	gene-dut/gene-ampd3a/gene-LOC122872164/gene-gda/gene-pde4ba/gene-macrod1/gene-elovl5/gene-acaca/gene-adss1/gene-cmpk2/gene-LOC122869764	11	acaca/adss1/ampd3a/cmpk2/dut/elovl5/gda/LOC122869764/LOC122872164/macrod1/pde4ba	8	gene-acaca/gene-adss1/gene-cmpk2/gene-elovl5/gene-gda/gene-LOC122869764/gene-LOC122872164/gene-macrod1	3
BP	GO:0006694	steroid biosynthetic process	2/430	40/11595	0.439936343020166	0.883916815746187	gene-snai2/gene-LOC122871599	2	LOC122871599/snai2	1	gene-LOC122871599	1
BP	GO:0008643	carbohydrate transport	2/430	40/11595	0.439936343020166	0.883916815746187	gene-LOC122889001/gene-mfsd2b	2	LOC122889001/mfsd2b	1	gene-LOC122889001	1
BP	GO:0009583	detection of light stimulus	2/430	40/11595	0.439936343020166	0.883916815746187	gene-LOC122887291/gene-parapinopsina	2	LOC122887291/parapinopsina	2	gene-LOC122887291/gene-parapinopsina	0
BP	GO:0019221	cytokine-mediated signaling pathway	2/430	40/11595	0.439936343020166	0.883916815746187	gene-cxcl12b/gene-csf1ra	2	csf1ra/cxcl12b	1	gene-csf1ra	1
BP	GO:0042063	gliogenesis	2/430	40/11595	0.439936343020166	0.883916815746187	gene-omgb/gene-ndrg1a	2	ndrg1a/omgb	2	gene-ndrg1a/gene-omgb	0
BP	GO:2001020	regulation of response to DNA damage stimulus	2/430	40/11595	0.439936343020166	0.883916815746187	gene-snai2/gene-cbx8a	2	cbx8a/snai2	0	-	2
BP	GO:2000113	negative regulation of cellular macromolecule biosynthetic process	9/430	222/11595	0.440787953041923	0.883916815746187	gene-znf703/gene-LOC122877917/gene-snai2/gene-id2a/gene-jazf1a/gene-LOC122865952/gene-cbx4/gene-cbx8a/gene-caprin2	9	caprin2/cbx4/cbx8a/id2a/jazf1a/LOC122865952/LOC122877917/snai2/znf703	2	gene-caprin2/gene-LOC122877917	7
BP	GO:0019637	organophosphate metabolic process	18/430	460/11595	0.441793947495956	0.883916815746187	gene-dut/gene-ampd3a/gene-h6pd/gene-LOC122872164/gene-LOC122874604/gene-plppr3b/gene-pde4ba/gene-plpp3/gene-itpkcb/gene-smpdl3b/gene-LOC122883245/gene-elovl5/gene-LOC122886641/gene-acaca/gene-adss1/gene-cmpk2/gene-LOC122869764/gene-pfkfb3	18	acaca/adss1/ampd3a/cmpk2/dut/elovl5/h6pd/itpkcb/LOC122869764/LOC122872164/LOC122874604/LOC122883245/LOC122886641/pde4ba/pfkfb3/plpp3/plppr3b/smpdl3b	11	gene-acaca/gene-adss1/gene-cmpk2/gene-elovl5/gene-h6pd/gene-LOC122869764/gene-LOC122872164/gene-LOC122883245/gene-LOC122886641/gene-pfkfb3/gene-plppr3b	7
BP	GO:0014065	phosphatidylinositol 3-kinase signaling	3/430	66/11595	0.445172432311691	0.883916815746187	gene-LOC122877917/gene-LOC122869242/gene-LOC122871413	3	LOC122869242/LOC122871413/LOC122877917	3	gene-LOC122869242/gene-LOC122871413/gene-LOC122877917	0
BP	GO:0043624	cellular protein complex disassembly	3/430	66/11595	0.445172432311691	0.883916815746187	gene-swap70a/gene-LOC122871423/gene-eps8a	3	eps8a/LOC122871423/swap70a	2	gene-eps8a/gene-LOC122871423	1
BP	GO:0051494	negative regulation of cytoskeleton organization	3/430	66/11595	0.445172432311691	0.883916815746187	gene-swap70a/gene-LOC122885147/gene-eps8a	3	eps8a/LOC122885147/swap70a	2	gene-eps8a/gene-LOC122885147	1
BP	GO:1902904	negative regulation of supramolecular fiber organization	3/430	66/11595	0.445172432311691	0.883916815746187	gene-swap70a/gene-LOC122885147/gene-eps8a	3	eps8a/LOC122885147/swap70a	2	gene-eps8a/gene-LOC122885147	1
BP	GO:0080135	regulation of cellular response to stress	4/430	92/11595	0.446246953317033	0.883916815746187	gene-LOC122877917/gene-omgb/gene-snai2/gene-cbx8a	4	cbx8a/LOC122877917/omgb/snai2	2	gene-LOC122877917/gene-omgb	2
BP	GO:0009259	ribonucleotide metabolic process	7/430	171/11595	0.4497659801675	0.883916815746187	gene-ampd3a/gene-LOC122872164/gene-pde4ba/gene-elovl5/gene-acaca/gene-adss1/gene-LOC122869764	7	acaca/adss1/ampd3a/elovl5/LOC122869764/LOC122872164/pde4ba	5	gene-acaca/gene-adss1/gene-elovl5/gene-LOC122869764/gene-LOC122872164	2
BP	GO:0048812	neuron projection morphogenesis	7/430	171/11595	0.4497659801675	0.883916815746187	gene-omgb/gene-myot/gene-LOC122888546/gene-pard6gb/gene-LOC122867164/gene-LOC122869123/gene-si:ch211-278a6.1	7	LOC122867164/LOC122869123/LOC122888546/myot/omgb/pard6gb/si:ch211-278a6.1	4	gene-LOC122869123/gene-myot/gene-omgb/gene-si:ch211-278a6.1	3
BP	GO:0120039	plasma membrane bounded cell projection morphogenesis	7/430	171/11595	0.4497659801675	0.883916815746187	gene-omgb/gene-myot/gene-LOC122888546/gene-pard6gb/gene-LOC122867164/gene-LOC122869123/gene-si:ch211-278a6.1	7	LOC122867164/LOC122869123/LOC122888546/myot/omgb/pard6gb/si:ch211-278a6.1	4	gene-LOC122869123/gene-myot/gene-omgb/gene-si:ch211-278a6.1	3
BP	GO:0061564	axon development	6/430	145/11595	0.451547921945006	0.883916815746187	gene-LOC122877917/gene-omgb/gene-myot/gene-LOC122888546/gene-pard6gb/gene-tnca	6	LOC122877917/LOC122888546/myot/omgb/pard6gb/tnca	3	gene-LOC122877917/gene-myot/gene-omgb	3
BP	GO:0016485	protein processing	2/430	41/11595	0.452562405389584	0.883916815746187	gene-plat/gene-LOC122871823	2	LOC122871823/plat	1	gene-plat	1
BP	GO:0043473	pigmentation	2/430	41/11595	0.452562405389584	0.883916815746187	gene-LOC122885551/gene-snai2	2	LOC122885551/snai2	1	gene-LOC122885551	1
BP	GO:0031401	positive regulation of protein modification process	5/430	119/11595	0.453193943928437	0.883916815746187	gene-dok7b/gene-znf703/gene-snai2/gene-LOC122886518/gene-LOC122871413	5	dok7b/LOC122871413/LOC122886518/snai2/znf703	2	gene-LOC122871413/gene-LOC122886518	3
BP	GO:0000045	autophagosome assembly	1/430	16/11595	0.45394758703364	0.883916815746187	gene-tbc1d14	1	tbc1d14	1	gene-tbc1d14	0
BP	GO:0001838	embryonic epithelial tube formation	1/430	16/11595	0.45394758703364	0.883916815746187	gene-pard6gb	1	pard6gb	0	-	1
BP	GO:0001841	neural tube formation	1/430	16/11595	0.45394758703364	0.883916815746187	gene-pard6gb	1	pard6gb	0	-	1
BP	GO:0006275	regulation of DNA replication	1/430	16/11595	0.45394758703364	0.883916815746187	gene-LOC122868820	1	LOC122868820	0	-	1
BP	GO:0009612	response to mechanical stimulus	1/430	16/11595	0.45394758703364	0.883916815746187	gene-tnca	1	tnca	0	-	1
BP	GO:0010811	positive regulation of cell-substrate adhesion	1/430	16/11595	0.45394758703364	0.883916815746187	gene-ndnf	1	ndnf	0	-	1
BP	GO:0021872	forebrain generation of neurons	1/430	16/11595	0.45394758703364	0.883916815746187	gene-ndnf	1	ndnf	0	-	1
BP	GO:0030865	cortical cytoskeleton organization	1/430	16/11595	0.45394758703364	0.883916815746187	gene-amotl2a	1	amotl2a	0	-	1
BP	GO:0030866	cortical actin cytoskeleton organization	1/430	16/11595	0.45394758703364	0.883916815746187	gene-amotl2a	1	amotl2a	0	-	1
BP	GO:0033059	cellular pigmentation	1/430	16/11595	0.45394758703364	0.883916815746187	gene-LOC122885551	1	LOC122885551	1	gene-LOC122885551	0
BP	GO:0043271	negative regulation of ion transport	1/430	16/11595	0.45394758703364	0.883916815746187	gene-gem	1	gem	1	gene-gem	0
BP	GO:0045666	positive regulation of neuron differentiation	1/430	16/11595	0.45394758703364	0.883916815746187	gene-LOC122887176	1	LOC122887176	0	-	1
BP	GO:0045727	positive regulation of translation	1/430	16/11595	0.45394758703364	0.883916815746187	gene-LOC122886518	1	LOC122886518	1	gene-LOC122886518	0
BP	GO:0048596	embryonic camera-type eye morphogenesis	1/430	16/11595	0.45394758703364	0.883916815746187	gene-znf703	1	znf703	0	-	1
BP	GO:0051016	barbed-end actin filament capping	1/430	16/11595	0.45394758703364	0.883916815746187	gene-eps8a	1	eps8a	1	gene-eps8a	0
BP	GO:0071383	cellular response to steroid hormone stimulus	1/430	16/11595	0.45394758703364	0.883916815746187	gene-LOC122865952	1	LOC122865952	0	-	1
BP	GO:1903169	regulation of calcium ion transmembrane transport	1/430	16/11595	0.45394758703364	0.883916815746187	gene-gem	1	gem	1	gene-gem	0
BP	GO:1905037	autophagosome organization	1/430	16/11595	0.45394758703364	0.883916815746187	gene-tbc1d14	1	tbc1d14	1	gene-tbc1d14	0
BP	GO:2001022	positive regulation of response to DNA damage stimulus	1/430	16/11595	0.45394758703364	0.883916815746187	gene-cbx8a	1	cbx8a	0	-	1
BP	GO:0019693	ribose phosphate metabolic process	7/430	172/11595	0.455817681939451	0.883916815746187	gene-ampd3a/gene-LOC122872164/gene-pde4ba/gene-elovl5/gene-acaca/gene-adss1/gene-LOC122869764	7	acaca/adss1/ampd3a/elovl5/LOC122869764/LOC122872164/pde4ba	5	gene-acaca/gene-adss1/gene-elovl5/gene-LOC122869764/gene-LOC122872164	2
BP	GO:0048858	cell projection morphogenesis	7/430	172/11595	0.455817681939451	0.883916815746187	gene-omgb/gene-myot/gene-LOC122888546/gene-pard6gb/gene-LOC122867164/gene-LOC122869123/gene-si:ch211-278a6.1	7	LOC122867164/LOC122869123/LOC122888546/myot/omgb/pard6gb/si:ch211-278a6.1	4	gene-LOC122869123/gene-myot/gene-omgb/gene-si:ch211-278a6.1	3
BP	GO:0010558	negative regulation of macromolecule biosynthetic process	9/430	225/11595	0.45668724709152	0.883916815746187	gene-znf703/gene-LOC122877917/gene-snai2/gene-id2a/gene-jazf1a/gene-LOC122865952/gene-cbx4/gene-cbx8a/gene-caprin2	9	caprin2/cbx4/cbx8a/id2a/jazf1a/LOC122865952/LOC122877917/snai2/znf703	2	gene-caprin2/gene-LOC122877917	7
BP	GO:0033043	regulation of organelle organization	11/430	278/11595	0.456773111265216	0.883916815746187	gene-swap70a/gene-LOC122885147/gene-znf703/gene-vdac3/gene-fmn2a/gene-LOC122886528/gene-snai2/gene-LOC122861414/gene-fmn1/gene-tbc1d14/gene-eps8a	11	eps8a/fmn1/fmn2a/LOC122861414/LOC122885147/LOC122886528/snai2/swap70a/tbc1d14/vdac3/znf703	7	gene-eps8a/gene-fmn1/gene-LOC122861414/gene-LOC122885147/gene-LOC122886528/gene-tbc1d14/gene-vdac3	4
BP	GO:0048592	eye morphogenesis	3/430	68/11595	0.464645664878053	0.883916815746187	gene-znf703/gene-id2a/gene-rpgrb	3	id2a/rpgrb/znf703	0	-	3
BP	GO:0033044	regulation of chromosome organization	2/430	42/11595	0.465024713609265	0.883916815746187	gene-znf703/gene-snai2	2	snai2/znf703	0	-	2
BP	GO:0090150	establishment of protein localization to membrane	2/430	42/11595	0.465024713609265	0.883916815746187	gene-LOC122878347/gene-LOC122863926	2	LOC122863926/LOC122878347	2	gene-LOC122863926/gene-LOC122878347	0
BP	GO:1902850	microtubule cytoskeleton organization involved in mitosis	2/430	42/11595	0.465024713609265	0.883916815746187	gene-tacc2/gene-sapcd1	2	sapcd1/tacc2	2	gene-sapcd1/gene-tacc2	0
BP	GO:0043087	regulation of GTPase activity	9/430	227/11595	0.467247875789631	0.883916815746187	gene-arhgap25/gene-sgsm1a/gene-rasgrp3/gene-asap1a/gene-arhgap24/gene-si:dkey-191m6.4/gene-rundc1/gene-tbc1d14/gene-tbc1d30	9	arhgap24/arhgap25/asap1a/rasgrp3/rundc1/sgsm1a/si:dkey-191m6.4/tbc1d14/tbc1d30	8	gene-arhgap25/gene-asap1a/gene-rasgrp3/gene-rundc1/gene-sgsm1a/gene-si:dkey-191m6.4/gene-tbc1d14/gene-tbc1d30	1
BP	GO:0032990	cell part morphogenesis	7/430	174/11595	0.467879451937998	0.883916815746187	gene-omgb/gene-myot/gene-LOC122888546/gene-pard6gb/gene-LOC122867164/gene-LOC122869123/gene-si:ch211-278a6.1	7	LOC122867164/LOC122869123/LOC122888546/myot/omgb/pard6gb/si:ch211-278a6.1	4	gene-LOC122869123/gene-myot/gene-omgb/gene-si:ch211-278a6.1	3
BP	GO:0045786	negative regulation of cell cycle	4/430	95/11595	0.470897212544804	0.883916815746187	gene-LOC122877917/gene-LOC122887176/gene-id2a/gene-LOC122865952	4	id2a/LOC122865952/LOC122877917/LOC122887176	1	gene-LOC122877917	3
BP	GO:0006766	vitamin metabolic process	1/430	17/11595	0.474225895831942	0.883916815746187	gene-snai2	1	snai2	0	-	1
BP	GO:0007631	feeding behavior	1/430	17/11595	0.474225895831942	0.883916815746187	gene-apln	1	apln	1	gene-apln	0
BP	GO:0009112	nucleobase metabolic process	1/430	17/11595	0.474225895831942	0.883916815746187	gene-gda	1	gda	1	gene-gda	0
BP	GO:0009190	cyclic nucleotide biosynthetic process	1/430	17/11595	0.474225895831942	0.883916815746187	gene-LOC122869764	1	LOC122869764	1	gene-LOC122869764	0
BP	GO:0016064	immunoglobulin mediated immune response	1/430	17/11595	0.474225895831942	0.883916815746187	gene-swap70a	1	swap70a	0	-	1
BP	GO:0019724	B cell mediated immunity	1/430	17/11595	0.474225895831942	0.883916815746187	gene-swap70a	1	swap70a	0	-	1
BP	GO:0031017	exocrine pancreas development	1/430	17/11595	0.474225895831942	0.883916815746187	gene-lnx2b	1	lnx2b	0	-	1
BP	GO:0043173	nucleotide salvage	1/430	17/11595	0.474225895831942	0.883916815746187	gene-ampd3a	1	ampd3a	0	-	1
BP	GO:0043534	blood vessel endothelial cell migration	1/430	17/11595	0.474225895831942	0.883916815746187	gene-LOC122877917	1	LOC122877917	1	gene-LOC122877917	0
BP	GO:0046631	alpha-beta T cell activation	1/430	17/11595	0.474225895831942	0.883916815746187	gene-wdfy4	1	wdfy4	1	gene-wdfy4	0
BP	GO:0046653	tetrahydrofolate metabolic process	1/430	17/11595	0.474225895831942	0.883916815746187	gene-aldh1l2	1	aldh1l2	1	gene-aldh1l2	0
BP	GO:0048048	embryonic eye morphogenesis	1/430	17/11595	0.474225895831942	0.883916815746187	gene-znf703	1	znf703	0	-	1
BP	GO:0051896	regulation of protein kinase B signaling	1/430	17/11595	0.474225895831942	0.883916815746187	gene-LOC122877917	1	LOC122877917	1	gene-LOC122877917	0
BP	GO:0060996	dendritic spine development	1/430	17/11595	0.474225895831942	0.883916815746187	gene-si:ch211-278a6.1	1	si:ch211-278a6.1	1	gene-si:ch211-278a6.1	0
BP	GO:0072331	signal transduction by p53 class mediator	1/430	17/11595	0.474225895831942	0.883916815746187	gene-snai2	1	snai2	0	-	1
BP	GO:0097061	dendritic spine organization	1/430	17/11595	0.474225895831942	0.883916815746187	gene-si:ch211-278a6.1	1	si:ch211-278a6.1	1	gene-si:ch211-278a6.1	0
BP	GO:1901215	negative regulation of neuron death	1/430	17/11595	0.474225895831942	0.883916815746187	gene-ndnf	1	ndnf	0	-	1
BP	GO:1901983	regulation of protein acetylation	1/430	17/11595	0.474225895831942	0.883916815746187	gene-snai2	1	snai2	0	-	1
BP	GO:1902017	regulation of cilium assembly	1/430	17/11595	0.474225895831942	0.883916815746187	gene-vdac3	1	vdac3	1	gene-vdac3	0
BP	GO:2000756	regulation of peptidyl-lysine acetylation	1/430	17/11595	0.474225895831942	0.883916815746187	gene-snai2	1	snai2	0	-	1
BP	GO:2001242	regulation of intrinsic apoptotic signaling pathway	1/430	17/11595	0.474225895831942	0.883916815746187	gene-snai2	1	snai2	0	-	1
BP	GO:0001934	positive regulation of protein phosphorylation	3/430	69/11595	0.474269795407381	0.883916815746187	gene-dok7b/gene-LOC122886518/gene-LOC122871413	3	dok7b/LOC122871413/LOC122886518	2	gene-LOC122871413/gene-LOC122886518	1
BP	GO:0048863	stem cell differentiation	3/430	69/11595	0.474269795407381	0.883916815746187	gene-tph2/gene-snai2/gene-tgfb3	3	snai2/tgfb3/tph2	0	-	3
BP	GO:0032989	cellular component morphogenesis	8/430	202/11595	0.476017875103554	0.883916815746187	gene-lrrc39/gene-omgb/gene-myot/gene-LOC122888546/gene-pard6gb/gene-LOC122867164/gene-LOC122869123/gene-si:ch211-278a6.1	8	LOC122867164/LOC122869123/LOC122888546/lrrc39/myot/omgb/pard6gb/si:ch211-278a6.1	5	gene-LOC122869123/gene-lrrc39/gene-myot/gene-omgb/gene-si:ch211-278a6.1	3
BP	GO:1901135	carbohydrate derivative metabolic process	19/430	496/11595	0.476018134756753	0.883916815746187	gene-dut/gene-ampd3a/gene-h6pd/gene-LOC122872164/gene-pde4ba/gene-ndnf/gene-st3gal4/gene-pglyrp5/gene-macrod1/gene-LOC122883245/gene-elovl5/gene-LOC122886641/gene-acaca/gene-adss1/gene-cmpk2/gene-LOC122863823/gene-gnsb/gene-LOC122869764/gene-pfkfb3	19	acaca/adss1/ampd3a/cmpk2/dut/elovl5/gnsb/h6pd/LOC122863823/LOC122869764/LOC122872164/LOC122883245/LOC122886641/macrod1/ndnf/pde4ba/pfkfb3/pglyrp5/st3gal4	12	gene-acaca/gene-adss1/gene-cmpk2/gene-elovl5/gene-gnsb/gene-h6pd/gene-LOC122869764/gene-LOC122872164/gene-LOC122883245/gene-LOC122886641/gene-macrod1/gene-pfkfb3	7
BP	GO:0048511	rhythmic process	3/430	70/11595	0.483814028312877	0.883916815746187	gene-LOC122875367/gene-otx5/gene-camk1gb	3	camk1gb/LOC122875367/otx5	2	gene-camk1gb/gene-otx5	1
BP	GO:0043085	positive regulation of catalytic activity	12/430	311/11595	0.486140192155738	0.883916815746187	gene-dok7b/gene-arhgap25/gene-sgsm1a/gene-LOC122877917/gene-LOC122881737/gene-rasgrp3/gene-asap1a/gene-arhgap24/gene-si:dkey-191m6.4/gene-rundc1/gene-tbc1d14/gene-tbc1d30	12	arhgap24/arhgap25/asap1a/dok7b/LOC122877917/LOC122881737/rasgrp3/rundc1/sgsm1a/si:dkey-191m6.4/tbc1d14/tbc1d30	9	gene-arhgap25/gene-asap1a/gene-LOC122877917/gene-rasgrp3/gene-rundc1/gene-sgsm1a/gene-si:dkey-191m6.4/gene-tbc1d14/gene-tbc1d30	3
BP	GO:0009117	nucleotide metabolic process	9/430	231/11595	0.488244926121223	0.883916815746187	gene-dut/gene-ampd3a/gene-LOC122872164/gene-pde4ba/gene-elovl5/gene-acaca/gene-adss1/gene-cmpk2/gene-LOC122869764	9	acaca/adss1/ampd3a/cmpk2/dut/elovl5/LOC122869764/LOC122872164/pde4ba	6	gene-acaca/gene-adss1/gene-cmpk2/gene-elovl5/gene-LOC122869764/gene-LOC122872164	3
BP	GO:0043010	camera-type eye development	5/430	124/11595	0.489187943684788	0.883916815746187	gene-znf703/gene-LOC122877917/gene-cryba2b/gene-id2a/gene-rpgrb	5	cryba2b/id2a/LOC122877917/rpgrb/znf703	2	gene-cryba2b/gene-LOC122877917	3
BP	GO:0006637	acyl-CoA metabolic process	2/430	44/11595	0.489437740434556	0.883916815746187	gene-elovl5/gene-acaca	2	acaca/elovl5	2	gene-acaca/gene-elovl5	0
BP	GO:0010035	response to inorganic substance	2/430	44/11595	0.489437740434556	0.883916815746187	gene-LOC122877917/gene-cbx8a	2	cbx8a/LOC122877917	1	gene-LOC122877917	1
BP	GO:0022407	regulation of cell-cell adhesion	2/430	44/11595	0.489437740434556	0.883916815746187	gene-swap70a/gene-LOC122877917	2	LOC122877917/swap70a	1	gene-LOC122877917	1
BP	GO:0030837	negative regulation of actin filament polymerization	2/430	44/11595	0.489437740434556	0.883916815746187	gene-LOC122885147/gene-eps8a	2	eps8a/LOC122885147	2	gene-eps8a/gene-LOC122885147	0
BP	GO:0032272	negative regulation of protein polymerization	2/430	44/11595	0.489437740434556	0.883916815746187	gene-LOC122885147/gene-eps8a	2	eps8a/LOC122885147	2	gene-eps8a/gene-LOC122885147	0
BP	GO:0035383	thioester metabolic process	2/430	44/11595	0.489437740434556	0.883916815746187	gene-elovl5/gene-acaca	2	acaca/elovl5	2	gene-acaca/gene-elovl5	0
BP	GO:0051302	regulation of cell division	2/430	44/11595	0.489437740434556	0.883916815746187	gene-LOC122888753/gene-tgfb3	2	LOC122888753/tgfb3	1	gene-LOC122888753	1
BP	GO:0051656	establishment of organelle localization	3/430	71/11595	0.49327496078061	0.883916815746187	gene-LOC122885551/gene-LOC122886528/gene-sapcd1	3	LOC122885551/LOC122886528/sapcd1	3	gene-LOC122885551/gene-LOC122886528/gene-sapcd1	0
BP	GO:0048598	embryonic morphogenesis	9/430	232/11595	0.493463496216932	0.883916815746187	gene-skib/gene-snai1a/gene-znf703/gene-LOC122877917/gene-apln/gene-grhl2b/gene-pard6gb/gene-pthlha/gene-LOC122871826	9	apln/grhl2b/LOC122871826/LOC122877917/pard6gb/pthlha/skib/snai1a/znf703	3	gene-apln/gene-grhl2b/gene-LOC122877917	6
BP	GO:0002088	lens development in camera-type eye	1/430	18/11595	0.493752831813309	0.883916815746187	gene-cryba2b	1	cryba2b	1	gene-cryba2b	0
BP	GO:0006313	transposition, DNA-mediated	1/430	18/11595	0.493752831813309	0.883916815746187	gene-pgbd5	1	pgbd5	1	gene-pgbd5	0
BP	GO:0006760	folic acid-containing compound metabolic process	1/430	18/11595	0.493752831813309	0.883916815746187	gene-aldh1l2	1	aldh1l2	1	gene-aldh1l2	0
BP	GO:0006939	smooth muscle contraction	1/430	18/11595	0.493752831813309	0.883916815746187	gene-LOC122863516	1	LOC122863516	0	-	1
BP	GO:0007422	peripheral nervous system development	1/430	18/11595	0.493752831813309	0.883916815746187	gene-ndrg1a	1	ndrg1a	1	gene-ndrg1a	0
BP	GO:0009066	aspartate family amino acid metabolic process	1/430	18/11595	0.493752831813309	0.883916815746187	gene-LOC122876938	1	LOC122876938	1	gene-LOC122876938	0
BP	GO:0010923	negative regulation of phosphatase activity	1/430	18/11595	0.493752831813309	0.883916815746187	gene-zgc:92242	1	zgc:92242	1	gene-zgc:92242	0
BP	GO:0019229	regulation of vasoconstriction	1/430	18/11595	0.493752831813309	0.883916815746187	gene-edn1	1	edn1	0	-	1
BP	GO:0019722	calcium-mediated signaling	1/430	18/11595	0.493752831813309	0.883916815746187	gene-rcan1b	1	rcan1b	1	gene-rcan1b	0
BP	GO:0030903	notochord development	1/430	18/11595	0.493752831813309	0.883916815746187	gene-rab32a	1	rab32a	1	gene-rab32a	0
BP	GO:0032196	transposition	1/430	18/11595	0.493752831813309	0.883916815746187	gene-pgbd5	1	pgbd5	1	gene-pgbd5	0
BP	GO:0033334	fin morphogenesis	1/430	18/11595	0.493752831813309	0.883916815746187	gene-itga3b	1	itga3b	1	gene-itga3b	0
BP	GO:0034250	positive regulation of cellular amide metabolic process	1/430	18/11595	0.493752831813309	0.883916815746187	gene-LOC122886518	1	LOC122886518	1	gene-LOC122886518	0
BP	GO:0035304	regulation of protein dephosphorylation	1/430	18/11595	0.493752831813309	0.883916815746187	gene-swap70a	1	swap70a	0	-	1
BP	GO:0043491	protein kinase B signaling	1/430	18/11595	0.493752831813309	0.883916815746187	gene-LOC122877917	1	LOC122877917	1	gene-LOC122877917	0
BP	GO:0062014	negative regulation of small molecule metabolic process	1/430	18/11595	0.493752831813309	0.883916815746187	gene-snai2	1	snai2	0	-	1
BP	GO:1902107	positive regulation of leukocyte differentiation	1/430	18/11595	0.493752831813309	0.883916815746187	gene-zbtb46	1	zbtb46	0	-	1
BP	GO:2001234	negative regulation of apoptotic signaling pathway	1/430	18/11595	0.493752831813309	0.883916815746187	gene-snai2	1	snai2	0	-	1
BP	GO:0048584	positive regulation of response to stimulus	11/430	286/11595	0.49466259410416	0.884434374652983	gene-swap70a/gene-tmem198a/gene-snai2/gene-bambia/gene-LOC122868841/gene-cbx8a/gene-LOC122870587/gene-LOC122869735/gene-LOC122869738/gene-LOC122871413/gene-caprin2	11	bambia/caprin2/cbx8a/LOC122868841/LOC122869735/LOC122869738/LOC122870587/LOC122871413/snai2/swap70a/tmem198a	7	gene-caprin2/gene-LOC122868841/gene-LOC122869735/gene-LOC122869738/gene-LOC122870587/gene-LOC122871413/gene-tmem198a	4
BP	GO:0030030	cell projection organization	18/430	475/11595	0.497290717584803	0.887437964250699	gene-LOC122872091/gene-odad3/gene-mtss1la/gene-znf703/gene-vdac3/gene-ndnf/gene-amotl2a/gene-LOC122877917/gene-omgb/gene-myot/gene-LOC122888546/gene-pard6gb/gene-tnca/gene-LOC122867164/gene-LOC122869123/gene-si:ch211-278a6.1/gene-mrtfbb/gene-rpgrb	18	amotl2a/LOC122867164/LOC122869123/LOC122872091/LOC122877917/LOC122888546/mrtfbb/mtss1la/myot/ndnf/odad3/omgb/pard6gb/rpgrb/si:ch211-278a6.1/tnca/vdac3/znf703	6	gene-LOC122869123/gene-LOC122877917/gene-myot/gene-omgb/gene-si:ch211-278a6.1/gene-vdac3	12
BP	GO:0010948	negative regulation of cell cycle process	2/430	45/11595	0.501379785548454	0.887437964250699	gene-LOC122877917/gene-LOC122865952	2	LOC122865952/LOC122877917	1	gene-LOC122877917	1
BP	GO:0035050	embryonic heart tube development	2/430	45/11595	0.501379785548454	0.887437964250699	gene-skib/gene-pard6gb	2	pard6gb/skib	0	-	2
BP	GO:0048588	developmental cell growth	2/430	45/11595	0.501379785548454	0.887437964250699	gene-omgb/gene-pard6gb	2	omgb/pard6gb	1	gene-omgb	1
BP	GO:1903706	regulation of hemopoiesis	2/430	45/11595	0.501379785548454	0.887437964250699	gene-zbtb46/gene-lrrc17	2	lrrc17/zbtb46	0	-	2
BP	GO:0044089	positive regulation of cellular component biogenesis	4/430	99/11595	0.503107999320854	0.887437964250699	gene-swap70a/gene-fmn2a/gene-LOC122861414/gene-fmn1	4	fmn1/fmn2a/LOC122861414/swap70a	2	gene-fmn1/gene-LOC122861414	2
BP	GO:0006753	nucleoside phosphate metabolic process	9/430	234/11595	0.503858231568372	0.887437964250699	gene-dut/gene-ampd3a/gene-LOC122872164/gene-pde4ba/gene-elovl5/gene-acaca/gene-adss1/gene-cmpk2/gene-LOC122869764	9	acaca/adss1/ampd3a/cmpk2/dut/elovl5/LOC122869764/LOC122872164/pde4ba	6	gene-acaca/gene-adss1/gene-cmpk2/gene-elovl5/gene-LOC122869764/gene-LOC122872164	3
BP	GO:0045934	negative regulation of nucleobase-containing compound metabolic process	8/430	208/11595	0.50925239603202	0.887437964250699	gene-znf703/gene-LOC122877917/gene-snai2/gene-id2a/gene-jazf1a/gene-LOC122865952/gene-cbx4/gene-cbx8a	8	cbx4/cbx8a/id2a/jazf1a/LOC122865952/LOC122877917/snai2/znf703	1	gene-LOC122877917	7
BP	GO:0016049	cell growth	3/430	73/11595	0.511934383174956	0.887437964250699	gene-omgb/gene-osgin2/gene-pard6gb	3	omgb/osgin2/pard6gb	2	gene-omgb/gene-osgin2	1
BP	GO:0010212	response to ionizing radiation	1/430	19/11595	0.512556173121098	0.887437964250699	gene-snai2	1	snai2	0	-	1
BP	GO:0010959	regulation of metal ion transport	1/430	19/11595	0.512556173121098	0.887437964250699	gene-gem	1	gem	1	gene-gem	0
BP	GO:0042476	odontogenesis	1/430	19/11595	0.512556173121098	0.887437964250699	gene-tnca	1	tnca	0	-	1
BP	GO:0045598	regulation of fat cell differentiation	1/430	19/11595	0.512556173121098	0.887437964250699	gene-snai2	1	snai2	0	-	1
BP	GO:0051924	regulation of calcium ion transport	1/430	19/11595	0.512556173121098	0.887437964250699	gene-gem	1	gem	1	gene-gem	0
BP	GO:0071478	cellular response to radiation	1/430	19/11595	0.512556173121098	0.887437964250699	gene-snai2	1	snai2	0	-	1
BP	GO:0106027	neuron projection organization	1/430	19/11595	0.512556173121098	0.887437964250699	gene-si:ch211-278a6.1	1	si:ch211-278a6.1	1	gene-si:ch211-278a6.1	0
BP	GO:1903510	mucopolysaccharide metabolic process	1/430	19/11595	0.512556173121098	0.887437964250699	gene-ndnf	1	ndnf	0	-	1
BP	GO:1903708	positive regulation of hemopoiesis	1/430	19/11595	0.512556173121098	0.887437964250699	gene-zbtb46	1	zbtb46	0	-	1
BP	GO:1904375	regulation of protein localization to cell periphery	1/430	19/11595	0.512556173121098	0.887437964250699	gene-sapcd1	1	sapcd1	1	gene-sapcd1	0
BP	GO:0044242	cellular lipid catabolic process	2/430	46/11595	0.513140655597755	0.887437964250699	gene-smpdl3b/gene-lpin1b	2	lpin1b/smpdl3b	1	gene-lpin1b	1
BP	GO:0048638	regulation of developmental growth	2/430	46/11595	0.513140655597755	0.887437964250699	gene-omgb/gene-pard6gb	2	omgb/pard6gb	1	gene-omgb	1
BP	GO:0099111	microtubule-based transport	2/430	46/11595	0.513140655597755	0.887437964250699	gene-LOC122886528/gene-rpgrb	2	LOC122886528/rpgrb	1	gene-LOC122886528	1
BP	GO:1901990	regulation of mitotic cell cycle phase transition	2/430	46/11595	0.513140655597755	0.887437964250699	gene-LOC122877917/gene-LOC122865952	2	LOC122865952/LOC122877917	1	gene-LOC122877917	1
BP	GO:0050877	nervous system process	9/430	236/11595	0.514191320878099	0.887437964250699	gene-LOC122887291/gene-LOC122878347/gene-parapinopsina/gene-cryba2b/gene-snai2/gene-LOC122862702/gene-LOC122863926/gene-LOC122865803/gene-myo15b	9	cryba2b/LOC122862702/LOC122863926/LOC122865803/LOC122878347/LOC122887291/myo15b/parapinopsina/snai2	8	gene-cryba2b/gene-LOC122862702/gene-LOC122863926/gene-LOC122865803/gene-LOC122878347/gene-LOC122887291/gene-myo15b/gene-parapinopsina	1
BP	GO:0001816	cytokine production	5/430	128/11595	0.517359515967346	0.887437964250699	gene-LOC122877917/gene-snai2/gene-LOC122869242/gene-LOC122869735/gene-LOC122869738	5	LOC122869242/LOC122869735/LOC122869738/LOC122877917/snai2	4	gene-LOC122869242/gene-LOC122869735/gene-LOC122869738/gene-LOC122877917	1
BP	GO:0001817	regulation of cytokine production	5/430	128/11595	0.517359515967346	0.887437964250699	gene-LOC122877917/gene-snai2/gene-LOC122869242/gene-LOC122869735/gene-LOC122869738	5	LOC122869242/LOC122869735/LOC122869738/LOC122877917/snai2	4	gene-LOC122869242/gene-LOC122869735/gene-LOC122869738/gene-LOC122877917	1
BP	GO:0044087	regulation of cellular component biogenesis	10/430	264/11595	0.518627068488056	0.887437964250699	gene-swap70a/gene-LOC122885147/gene-vdac3/gene-fmn2a/gene-snai2/gene-LOC122861414/gene-fmn1/gene-LOC122869242/gene-tbc1d14/gene-eps8a	10	eps8a/fmn1/fmn2a/LOC122861414/LOC122869242/LOC122885147/snai2/swap70a/tbc1d14/vdac3	7	gene-eps8a/gene-fmn1/gene-LOC122861414/gene-LOC122869242/gene-LOC122885147/gene-tbc1d14/gene-vdac3	3
BP	GO:0007219	Notch signaling pathway	3/430	74/11595	0.521127119989766	0.887437964250699	gene-LOC122873030/gene-snai2/gene-id2a	3	id2a/LOC122873030/snai2	0	-	3
BP	GO:0009628	response to abiotic stimulus	7/430	183/11595	0.521235299049229	0.887437964250699	gene-ddit3/gene-LOC122887291/gene-gpr4/gene-apln/gene-parapinopsina/gene-snai2/gene-tnca	7	apln/ddit3/gpr4/LOC122887291/parapinopsina/snai2/tnca	4	gene-apln/gene-ddit3/gene-LOC122887291/gene-parapinopsina	3
BP	GO:0051052	regulation of DNA metabolic process	2/430	47/11595	0.524717340924317	0.887437964250699	gene-LOC122877917/gene-cbx8a	2	cbx8a/LOC122877917	1	gene-LOC122877917	1
BP	GO:0055123	digestive system development	2/430	47/11595	0.524717340924317	0.887437964250699	gene-lnx2b/gene-pard6gb	2	lnx2b/pard6gb	0	-	2
BP	GO:1901880	negative regulation of protein depolymerization	2/430	47/11595	0.524717340924317	0.887437964250699	gene-swap70a/gene-eps8a	2	eps8a/swap70a	1	gene-eps8a	1
BP	GO:0031327	negative regulation of cellular biosynthetic process	9/430	239/11595	0.529562450642348	0.887437964250699	gene-znf703/gene-LOC122877917/gene-snai2/gene-id2a/gene-jazf1a/gene-LOC122865952/gene-cbx4/gene-cbx8a/gene-caprin2	9	caprin2/cbx4/cbx8a/id2a/jazf1a/LOC122865952/LOC122877917/snai2/znf703	2	gene-caprin2/gene-LOC122877917	7
BP	GO:0060562	epithelial tube morphogenesis	3/430	75/11595	0.530225038337588	0.887437964250699	gene-skib/gene-pard6gb/gene-tnca	3	pard6gb/skib/tnca	0	-	3
BP	GO:0098660	inorganic ion transmembrane transport	3/430	75/11595	0.530225038337588	0.887437964250699	gene-LOC122870126/gene-slc12a5a/gene-gem	3	gem/LOC122870126/slc12a5a	3	gene-gem/gene-LOC122870126/gene-slc12a5a	0
BP	GO:0000041	transition metal ion transport	1/430	20/11595	0.530662673255681	0.887437964250699	gene-LOC122868396	1	LOC122868396	1	gene-LOC122868396	0
BP	GO:0001945	lymph vessel development	1/430	20/11595	0.530662673255681	0.887437964250699	gene-apln	1	apln	1	gene-apln	0
BP	GO:0009062	fatty acid catabolic process	1/430	20/11595	0.530662673255681	0.887437964250699	gene-lpin1b	1	lpin1b	1	gene-lpin1b	0
BP	GO:0015718	monocarboxylic acid transport	1/430	20/11595	0.530662673255681	0.887437964250699	gene-LOC122871427	1	LOC122871427	1	gene-LOC122871427	0
BP	GO:0021536	diencephalon development	1/430	20/11595	0.530662673255681	0.887437964250699	gene-ndnf	1	ndnf	0	-	1
BP	GO:0030308	negative regulation of cell growth	1/430	20/11595	0.530662673255681	0.887437964250699	gene-osgin2	1	osgin2	1	gene-osgin2	0
BP	GO:0031076	embryonic camera-type eye development	1/430	20/11595	0.530662673255681	0.887437964250699	gene-znf703	1	znf703	0	-	1
BP	GO:0031101	fin regeneration	1/430	20/11595	0.530662673255681	0.887437964250699	gene-ccn1	1	ccn1	0	-	1
BP	GO:0043523	regulation of neuron apoptotic process	1/430	20/11595	0.530662673255681	0.887437964250699	gene-ndnf	1	ndnf	0	-	1
BP	GO:0043647	inositol phosphate metabolic process	1/430	20/11595	0.530662673255681	0.887437964250699	gene-itpkcb	1	itpkcb	0	-	1
BP	GO:0048167	regulation of synaptic plasticity	1/430	20/11595	0.530662673255681	0.887437964250699	gene-nsmfb	1	nsmfb	1	gene-nsmfb	0
BP	GO:0048284	organelle fusion	1/430	20/11595	0.530662673255681	0.887437964250699	gene-mfn1a	1	mfn1a	1	gene-mfn1a	0
BP	GO:0051402	neuron apoptotic process	1/430	20/11595	0.530662673255681	0.887437964250699	gene-ndnf	1	ndnf	0	-	1
BP	GO:0060216	definitive hemopoiesis	1/430	20/11595	0.530662673255681	0.887437964250699	gene-cebpa	1	cebpa	1	gene-cebpa	0
BP	GO:0070373	negative regulation of ERK1 and ERK2 cascade	1/430	20/11595	0.530662673255681	0.887437964250699	gene-LOC122877917	1	LOC122877917	1	gene-LOC122877917	0
BP	GO:0090090	negative regulation of canonical Wnt signaling pathway	1/430	20/11595	0.530662673255681	0.887437964250699	gene-snai2	1	snai2	0	-	1
BP	GO:0090288	negative regulation of cellular response to growth factor stimulus	1/430	20/11595	0.530662673255681	0.887437964250699	gene-nog2	1	nog2	0	-	1
BP	GO:0048568	embryonic organ development	7/430	185/11595	0.532834808181931	0.887437964250699	gene-cebpa/gene-skib/gene-znf703/gene-rab32a/gene-pard6gb/gene-mrtfbb/gene-pthlha	7	cebpa/mrtfbb/pard6gb/pthlha/rab32a/skib/znf703	2	gene-cebpa/gene-rab32a	5
BP	GO:0031324	negative regulation of cellular metabolic process	13/430	349/11595	0.534108085344525	0.887437964250699	gene-swap70a/gene-znf703/gene-LOC122877917/gene-zgc:92242/gene-snai2/gene-LOC122886518/gene-id2a/gene-jazf1a/gene-LOC122865952/gene-cbx4/gene-cbx8a/gene-tbc1d14/gene-caprin2	13	caprin2/cbx4/cbx8a/id2a/jazf1a/LOC122865952/LOC122877917/LOC122886518/snai2/swap70a/tbc1d14/zgc:92242/znf703	5	gene-caprin2/gene-LOC122877917/gene-LOC122886518/gene-tbc1d14/gene-zgc:92242	8
BP	GO:0002064	epithelial cell development	2/430	48/11595	0.536107302707787	0.887437964250699	gene-LOC122870658/gene-LOC122865952	2	LOC122865952/LOC122870658	1	gene-LOC122870658	1
BP	GO:0006633	fatty acid biosynthetic process	2/430	48/11595	0.536107302707787	0.887437964250699	gene-elovl5/gene-acaca	2	acaca/elovl5	2	gene-acaca/gene-elovl5	0
BP	GO:0009581	detection of external stimulus	2/430	48/11595	0.536107302707787	0.887437964250699	gene-LOC122887291/gene-parapinopsina	2	LOC122887291/parapinopsina	2	gene-LOC122887291/gene-parapinopsina	0
BP	GO:0009582	detection of abiotic stimulus	2/430	48/11595	0.536107302707787	0.887437964250699	gene-LOC122887291/gene-parapinopsina	2	LOC122887291/parapinopsina	2	gene-LOC122887291/gene-parapinopsina	0
BP	GO:0016052	carbohydrate catabolic process	2/430	48/11595	0.536107302707787	0.887437964250699	gene-galt/gene-enosf1	2	enosf1/galt	2	gene-enosf1/gene-galt	0
BP	GO:0035150	regulation of tube size	2/430	48/11595	0.536107302707787	0.887437964250699	gene-LOC122863516/gene-edn1	2	edn1/LOC122863516	0	-	2
BP	GO:0035296	regulation of tube diameter	2/430	48/11595	0.536107302707787	0.887437964250699	gene-LOC122863516/gene-edn1	2	edn1/LOC122863516	0	-	2
BP	GO:0060026	convergent extension	2/430	48/11595	0.536107302707787	0.887437964250699	gene-amotl2a/gene-LOC122871826	2	amotl2a/LOC122871826	0	-	2
BP	GO:0097746	blood vessel diameter maintenance	2/430	48/11595	0.536107302707787	0.887437964250699	gene-LOC122863516/gene-edn1	2	edn1/LOC122863516	0	-	2
BP	GO:0009790	embryo development	15/430	404/11595	0.536199359452527	0.887437964250699	gene-cebpa/gene-skib/gene-snai1a/gene-znf703/gene-amotl2a/gene-LOC122877917/gene-apln/gene-rab32a/gene-grhl2b/gene-pard6gb/gene-LOC122869123/gene-rundc1/gene-mrtfbb/gene-pthlha/gene-LOC122871826	15	amotl2a/apln/cebpa/grhl2b/LOC122869123/LOC122871826/LOC122877917/mrtfbb/pard6gb/pthlha/rab32a/rundc1/skib/snai1a/znf703	7	gene-apln/gene-cebpa/gene-grhl2b/gene-LOC122869123/gene-LOC122877917/gene-rab32a/gene-rundc1	8
BP	GO:0045321	leukocyte activation	5/430	131/11595	0.538054130765124	0.88750204363724	gene-swap70a/gene-LOC122873767/gene-wdfy4/gene-ndrg1a/gene-LOC122869242	5	LOC122869242/LOC122873767/ndrg1a/swap70a/wdfy4	4	gene-LOC122869242/gene-LOC122873767/gene-ndrg1a/gene-wdfy4	1
BP	GO:0051146	striated muscle cell differentiation	3/430	76/11595	0.539225752542103	0.88750204363724	gene-lrrc39/gene-myofl/gene-pdzph1	3	lrrc39/myofl/pdzph1	2	gene-lrrc39/gene-pdzph1	1
BP	GO:0050776	regulation of immune response	6/430	159/11595	0.541316399292897	0.88750204363724	gene-irf1b/gene-LOC122868841/gene-LOC122869242/gene-LOC122870587/gene-LOC122869735/gene-LOC122869738	6	irf1b/LOC122868841/LOC122869242/LOC122869735/LOC122869738/LOC122870587	6	gene-irf1b/gene-LOC122868841/gene-LOC122869242/gene-LOC122869735/gene-LOC122869738/gene-LOC122870587	0
BP	GO:0010243	response to organonitrogen compound	4/430	104/11595	0.54210950701702	0.88750204363724	gene-LOC122864683/gene-LOC122877917/gene-pid1/gene-si:ch73-335l21.1	4	LOC122864683/LOC122877917/pid1/si:ch73-335l21.1	2	gene-LOC122864683/gene-LOC122877917	2
BP	GO:0032269	negative regulation of cellular protein metabolic process	4/430	104/11595	0.54210950701702	0.88750204363724	gene-swap70a/gene-LOC122877917/gene-LOC122886518/gene-caprin2	4	caprin2/LOC122877917/LOC122886518/swap70a	3	gene-caprin2/gene-LOC122877917/gene-LOC122886518	1
BP	GO:0051248	negative regulation of protein metabolic process	4/430	104/11595	0.54210950701702	0.88750204363724	gene-swap70a/gene-LOC122877917/gene-LOC122886518/gene-caprin2	4	caprin2/LOC122877917/LOC122886518/swap70a	3	gene-caprin2/gene-LOC122877917/gene-LOC122886518	1
BP	GO:2000026	regulation of multicellular organismal development	7/430	187/11595	0.544323341582259	0.88750204363724	gene-LOC122877917/gene-LOC122881519/gene-zbtb46/gene-snai2/gene-tgfb3/gene-lrrc17/gene-tafa5a	7	LOC122877917/LOC122881519/lrrc17/snai2/tafa5a/tgfb3/zbtb46	2	gene-LOC122877917/gene-LOC122881519	5
BP	GO:0043242	negative regulation of protein-containing complex disassembly	2/430	49/11595	0.547308442330274	0.88750204363724	gene-swap70a/gene-eps8a	2	eps8a/swap70a	1	gene-eps8a	1
BP	GO:0045765	regulation of angiogenesis	2/430	49/11595	0.547308442330274	0.88750204363724	gene-LOC122877917/gene-tafa5a	2	LOC122877917/tafa5a	1	gene-LOC122877917	1
BP	GO:0002366	leukocyte activation involved in immune response	1/430	21/11595	0.548098098784843	0.88750204363724	gene-swap70a	1	swap70a	0	-	1
BP	GO:0006636	unsaturated fatty acid biosynthetic process	1/430	21/11595	0.548098098784843	0.88750204363724	gene-elovl5	1	elovl5	1	gene-elovl5	0
BP	GO:0006638	neutral lipid metabolic process	1/430	21/11595	0.548098098784843	0.88750204363724	gene-lpin1b	1	lpin1b	1	gene-lpin1b	0
BP	GO:0006639	acylglycerol metabolic process	1/430	21/11595	0.548098098784843	0.88750204363724	gene-lpin1b	1	lpin1b	1	gene-lpin1b	0
BP	GO:0006641	triglyceride metabolic process	1/430	21/11595	0.548098098784843	0.88750204363724	gene-lpin1b	1	lpin1b	1	gene-lpin1b	0
BP	GO:0019932	second-messenger-mediated signaling	1/430	21/11595	0.548098098784843	0.88750204363724	gene-rcan1b	1	rcan1b	1	gene-rcan1b	0
BP	GO:0021954	central nervous system neuron development	1/430	21/11595	0.548098098784843	0.88750204363724	gene-ndnf	1	ndnf	0	-	1
BP	GO:0035023	regulation of Rho protein signal transduction	1/430	21/11595	0.548098098784843	0.88750204363724	gene-LOC122865952	1	LOC122865952	0	-	1
BP	GO:0051051	negative regulation of transport	1/430	21/11595	0.548098098784843	0.88750204363724	gene-gem	1	gem	1	gene-gem	0
BP	GO:0008202	steroid metabolic process	3/430	77/11595	0.548127062561851	0.88750204363724	gene-snai2/gene-nfe2l1a/gene-LOC122871599	3	LOC122871599/nfe2l1a/snai2	2	gene-LOC122871599/gene-nfe2l1a	1
BP	GO:0031325	positive regulation of cellular metabolic process	16/430	436/11595	0.554284152557717	0.88750204363724	gene-dok7b/gene-znf703/gene-ddah1/gene-LOC122877917/gene-otx5/gene-LOC122880569/gene-LOC122881737/gene-rel/gene-LOC122886528/gene-snai2/gene-LOC122886518/gene-mef2ca/gene-mrtfbb/gene-cbx8a/gene-LOC122871423/gene-LOC122871413	16	cbx8a/ddah1/dok7b/LOC122871413/LOC122871423/LOC122877917/LOC122880569/LOC122881737/LOC122886518/LOC122886528/mef2ca/mrtfbb/otx5/rel/snai2/znf703	9	gene-LOC122871413/gene-LOC122871423/gene-LOC122877917/gene-LOC122880569/gene-LOC122886518/gene-LOC122886528/gene-mef2ca/gene-otx5/gene-rel	7
BP	GO:0061024	membrane organization	4/430	106/11595	0.557267480335534	0.88750204363724	gene-mtss1la/gene-LOC122878347/gene-LOC122863926/gene-ndrg1a	4	LOC122863926/LOC122878347/mtss1la/ndrg1a	3	gene-LOC122863926/gene-LOC122878347/gene-ndrg1a	1
BP	GO:0003018	vascular process in circulatory system	2/430	50/11595	0.558319072356938	0.88750204363724	gene-LOC122863516/gene-edn1	2	edn1/LOC122863516	0	-	2
BP	GO:0014067	negative regulation of phosphatidylinositol 3-kinase signaling	2/430	50/11595	0.558319072356938	0.88750204363724	gene-LOC122877917/gene-LOC122869242	2	LOC122869242/LOC122877917	2	gene-LOC122869242/gene-LOC122877917	0
BP	GO:0034976	response to endoplasmic reticulum stress	2/430	50/11595	0.558319072356938	0.88750204363724	gene-ddit3/gene-LOC122886518	2	ddit3/LOC122886518	2	gene-ddit3/gene-LOC122886518	0
BP	GO:1901879	regulation of protein depolymerization	2/430	50/11595	0.558319072356938	0.88750204363724	gene-swap70a/gene-eps8a	2	eps8a/swap70a	1	gene-eps8a	1
BP	GO:0006790	sulfur compound metabolic process	5/430	134/11595	0.558333078205125	0.88750204363724	gene-LOC122876938/gene-ndnf/gene-elovl5/gene-acaca/gene-cbsa	5	acaca/cbsa/elovl5/LOC122876938/ndnf	4	gene-acaca/gene-cbsa/gene-elovl5/gene-LOC122876938	1
BP	GO:0048667	cell morphogenesis involved in neuron differentiation	6/430	162/11595	0.559744719100841	0.88750204363724	gene-omgb/gene-myot/gene-LOC122888546/gene-pard6gb/gene-LOC122869123/gene-si:ch211-278a6.1	6	LOC122869123/LOC122888546/myot/omgb/pard6gb/si:ch211-278a6.1	4	gene-LOC122869123/gene-myot/gene-omgb/gene-si:ch211-278a6.1	2
BP	GO:0090407	organophosphate biosynthetic process	9/430	245/11595	0.559773605256025	0.88750204363724	gene-dut/gene-ampd3a/gene-LOC122874604/gene-itpkcb/gene-elovl5/gene-acaca/gene-adss1/gene-cmpk2/gene-LOC122869764	9	acaca/adss1/ampd3a/cmpk2/dut/elovl5/itpkcb/LOC122869764/LOC122874604	5	gene-acaca/gene-adss1/gene-cmpk2/gene-elovl5/gene-LOC122869764	4
BP	GO:0051173	positive regulation of nitrogen compound metabolic process	15/430	411/11595	0.563519637983509	0.88750204363724	gene-dok7b/gene-znf703/gene-ddah1/gene-LOC122877917/gene-otx5/gene-LOC122880569/gene-LOC122881737/gene-rel/gene-snai2/gene-LOC122886518/gene-mef2ca/gene-mrtfbb/gene-cbx8a/gene-LOC122871423/gene-LOC122871413	15	cbx8a/ddah1/dok7b/LOC122871413/LOC122871423/LOC122877917/LOC122880569/LOC122881737/LOC122886518/mef2ca/mrtfbb/otx5/rel/snai2/znf703	8	gene-LOC122871413/gene-LOC122871423/gene-LOC122877917/gene-LOC122880569/gene-LOC122886518/gene-mef2ca/gene-otx5/gene-rel	7
BP	GO:0009890	negative regulation of biosynthetic process	9/430	246/11595	0.564732388913953	0.88750204363724	gene-znf703/gene-LOC122877917/gene-snai2/gene-id2a/gene-jazf1a/gene-LOC122865952/gene-cbx4/gene-cbx8a/gene-caprin2	9	caprin2/cbx4/cbx8a/id2a/jazf1a/LOC122865952/LOC122877917/snai2/znf703	2	gene-caprin2/gene-LOC122877917	7
BP	GO:0010628	positive regulation of gene expression	4/430	107/11595	0.564744988600755	0.88750204363724	gene-LOC122877917/gene-LOC122886518/gene-tnca/gene-wbp2	4	LOC122877917/LOC122886518/tnca/wbp2	3	gene-LOC122877917/gene-LOC122886518/gene-wbp2	1
BP	GO:0002263	cell activation involved in immune response	1/430	22/11595	0.564887265669457	0.88750204363724	gene-swap70a	1	swap70a	0	-	1
BP	GO:0006368	transcription elongation from RNA polymerase II promoter	1/430	22/11595	0.564887265669457	0.88750204363724	gene-LOC122880569	1	LOC122880569	1	gene-LOC122880569	0
BP	GO:0007492	endoderm development	1/430	22/11595	0.564887265669457	0.88750204363724	gene-apln	1	apln	1	gene-apln	0
BP	GO:0008593	regulation of Notch signaling pathway	1/430	22/11595	0.564887265669457	0.88750204363724	gene-id2a	1	id2a	0	-	1
BP	GO:0016573	histone acetylation	1/430	22/11595	0.564887265669457	0.88750204363724	gene-snai2	1	snai2	0	-	1
BP	GO:0030010	establishment of cell polarity	1/430	22/11595	0.564887265669457	0.88750204363724	gene-sapcd1	1	sapcd1	1	gene-sapcd1	0
BP	GO:0030510	regulation of BMP signaling pathway	1/430	22/11595	0.564887265669457	0.88750204363724	gene-nog2	1	nog2	0	-	1
BP	GO:0032011	ARF protein signal transduction	1/430	22/11595	0.564887265669457	0.88750204363724	gene-arfgef3	1	arfgef3	1	gene-arfgef3	0
BP	GO:0032012	regulation of ARF protein signal transduction	1/430	22/11595	0.564887265669457	0.88750204363724	gene-arfgef3	1	arfgef3	1	gene-arfgef3	0
BP	GO:0033559	unsaturated fatty acid metabolic process	1/430	22/11595	0.564887265669457	0.88750204363724	gene-elovl5	1	elovl5	1	gene-elovl5	0
BP	GO:0034968	histone lysine methylation	1/430	22/11595	0.564887265669457	0.88750204363724	gene-gfi1aa	1	gfi1aa	1	gene-gfi1aa	0
BP	GO:0060215	primitive hemopoiesis	1/430	22/11595	0.564887265669457	0.88750204363724	gene-cebpa	1	cebpa	1	gene-cebpa	0
BP	GO:0090504	epiboly	1/430	22/11595	0.564887265669457	0.88750204363724	gene-snai2	1	snai2	0	-	1
BP	GO:1901888	regulation of cell junction assembly	1/430	22/11595	0.564887265669457	0.88750204363724	gene-snai2	1	snai2	0	-	1
BP	GO:2001257	regulation of cation channel activity	1/430	22/11595	0.564887265669457	0.88750204363724	gene-gem	1	gem	1	gene-gem	0
BP	GO:0042327	positive regulation of phosphorylation	3/430	79/11595	0.565623562344389	0.887680150155016	gene-dok7b/gene-LOC122886518/gene-LOC122871413	3	dok7b/LOC122871413/LOC122886518	2	gene-LOC122871413/gene-LOC122886518	1
BP	GO:0016042	lipid catabolic process	4/430	108/11595	0.572152913440383	0.889152159181855	gene-LOC122881246/gene-smpdl3b/gene-lpin1b/gene-plcd3a	4	LOC122881246/lpin1b/plcd3a/smpdl3b	2	gene-lpin1b/gene-plcd3a	2
BP	GO:0007264	small GTPase mediated signal transduction	8/430	220/11595	0.573459961689107	0.889152159181855	gene-LOC122869858/gene-rgl2/gene-rasgrp3/gene-LOC122884943/gene-arfgef3/gene-LOC122865952/gene-LOC122865539/gene-LOC122869789	8	arfgef3/LOC122865539/LOC122865952/LOC122869789/LOC122869858/LOC122884943/rasgrp3/rgl2	7	gene-arfgef3/gene-LOC122865539/gene-LOC122869789/gene-LOC122869858/gene-LOC122884943/gene-rasgrp3/gene-rgl2	1
BP	GO:0018205	peptidyl-lysine modification	3/430	80/11595	0.574215226714247	0.889152159181855	gene-snai2/gene-gfi1aa/gene-loxl3b	3	gfi1aa/loxl3b/snai2	1	gene-gfi1aa	2
BP	GO:0009893	positive regulation of metabolic process	18/430	497/11595	0.576482330174101	0.889152159181855	gene-dok7b/gene-znf703/gene-ddah1/gene-LOC122877917/gene-otx5/gene-LOC122880569/gene-LOC122881737/gene-rel/gene-LOC122886528/gene-snai2/gene-LOC122886518/gene-mef2ca/gene-tnca/gene-wbp2/gene-mrtfbb/gene-cbx8a/gene-LOC122871423/gene-LOC122871413	18	cbx8a/ddah1/dok7b/LOC122871413/LOC122871423/LOC122877917/LOC122880569/LOC122881737/LOC122886518/LOC122886528/mef2ca/mrtfbb/otx5/rel/snai2/tnca/wbp2/znf703	10	gene-LOC122871413/gene-LOC122871423/gene-LOC122877917/gene-LOC122880569/gene-LOC122886518/gene-LOC122886528/gene-mef2ca/gene-otx5/gene-rel/gene-wbp2	8
BP	GO:0043254	regulation of protein-containing complex assembly	6/430	165/11595	0.577820542556717	0.889152159181855	gene-LOC122885147/gene-fmn2a/gene-LOC122861414/gene-fmn1/gene-LOC122869242/gene-eps8a	6	eps8a/fmn1/fmn2a/LOC122861414/LOC122869242/LOC122885147	5	gene-eps8a/gene-fmn1/gene-LOC122861414/gene-LOC122869242/gene-LOC122885147	1
BP	GO:0003341	cilium movement	2/430	52/11595	0.579763946379133	0.889152159181855	gene-odad3/gene-rpgrb	2	odad3/rpgrb	0	-	2
BP	GO:0007605	sensory perception of sound	2/430	52/11595	0.579763946379133	0.889152159181855	gene-snai2/gene-myo15b	2	myo15b/snai2	1	gene-myo15b	1
BP	GO:0030178	negative regulation of Wnt signaling pathway	2/430	52/11595	0.579763946379133	0.889152159181855	gene-LOC122884881/gene-snai2	2	LOC122884881/snai2	0	-	2
BP	GO:0033865	nucleoside bisphosphate metabolic process	2/430	52/11595	0.579763946379133	0.889152159181855	gene-elovl5/gene-acaca	2	acaca/elovl5	2	gene-acaca/gene-elovl5	0
BP	GO:0033875	ribonucleoside bisphosphate metabolic process	2/430	52/11595	0.579763946379133	0.889152159181855	gene-elovl5/gene-acaca	2	acaca/elovl5	2	gene-acaca/gene-elovl5	0
BP	GO:0034032	purine nucleoside bisphosphate metabolic process	2/430	52/11595	0.579763946379133	0.889152159181855	gene-elovl5/gene-acaca	2	acaca/elovl5	2	gene-acaca/gene-elovl5	0
BP	GO:1901342	regulation of vasculature development	2/430	52/11595	0.579763946379133	0.889152159181855	gene-LOC122877917/gene-tafa5a	2	LOC122877917/tafa5a	1	gene-LOC122877917	1
BP	GO:0009891	positive regulation of biosynthetic process	10/430	277/11595	0.580446761032622	0.889152159181855	gene-ddah1/gene-LOC122877917/gene-otx5/gene-LOC122880569/gene-rel/gene-LOC122886518/gene-mef2ca/gene-mrtfbb/gene-cbx8a/gene-LOC122871423	10	cbx8a/ddah1/LOC122871423/LOC122877917/LOC122880569/LOC122886518/mef2ca/mrtfbb/otx5/rel	7	gene-LOC122871423/gene-LOC122877917/gene-LOC122880569/gene-LOC122886518/gene-mef2ca/gene-otx5/gene-rel	3
BP	GO:0001754	eye photoreceptor cell differentiation	1/430	23/11595	0.581054074255142	0.889152159181855	gene-rpgrb	1	rpgrb	0	-	1
BP	GO:0006282	regulation of DNA repair	1/430	23/11595	0.581054074255142	0.889152159181855	gene-cbx8a	1	cbx8a	0	-	1
BP	GO:0006475	internal protein amino acid acetylation	1/430	23/11595	0.581054074255142	0.889152159181855	gene-snai2	1	snai2	0	-	1
BP	GO:0007050	cell cycle arrest	1/430	23/11595	0.581054074255142	0.889152159181855	gene-LOC122887176	1	LOC122887176	0	-	1
BP	GO:0007093	mitotic cell cycle checkpoint	1/430	23/11595	0.581054074255142	0.889152159181855	gene-id2a	1	id2a	0	-	1
BP	GO:0018393	internal peptidyl-lysine acetylation	1/430	23/11595	0.581054074255142	0.889152159181855	gene-snai2	1	snai2	0	-	1
BP	GO:0021510	spinal cord development	1/430	23/11595	0.581054074255142	0.889152159181855	gene-pard6gb	1	pard6gb	0	-	1
BP	GO:0030239	myofibril assembly	1/430	23/11595	0.581054074255142	0.889152159181855	gene-lrrc39	1	lrrc39	1	gene-lrrc39	0
BP	GO:0070286	axonemal dynein complex assembly	1/430	23/11595	0.581054074255142	0.889152159181855	gene-odad3	1	odad3	0	-	1
BP	GO:0072329	monocarboxylic acid catabolic process	1/430	23/11595	0.581054074255142	0.889152159181855	gene-lpin1b	1	lpin1b	1	gene-lpin1b	0
BP	GO:0051172	negative regulation of nitrogen compound metabolic process	11/430	305/11595	0.581536710426308	0.889152159181855	gene-swap70a/gene-znf703/gene-LOC122877917/gene-snai2/gene-LOC122886518/gene-id2a/gene-jazf1a/gene-LOC122865952/gene-cbx4/gene-cbx8a/gene-caprin2	11	caprin2/cbx4/cbx8a/id2a/jazf1a/LOC122865952/LOC122877917/LOC122886518/snai2/swap70a/znf703	3	gene-caprin2/gene-LOC122877917/gene-LOC122886518	8
BP	GO:0051239	regulation of multicellular organismal process	16/430	444/11595	0.584097261936942	0.892109965980859	gene-parvb/gene-LOC122877917/gene-apln/gene-LOC122881519/gene-zbtb46/gene-snai2/gene-tgfb3/gene-edn1/gene-pdzph1/gene-mrtfbb/gene-LOC122869242/gene-LOC122869735/gene-LOC122869738/gene-lrrc17/gene-tafa5a/gene-caprin2	16	apln/caprin2/edn1/LOC122869242/LOC122869735/LOC122869738/LOC122877917/LOC122881519/lrrc17/mrtfbb/parvb/pdzph1/snai2/tafa5a/tgfb3/zbtb46	9	gene-apln/gene-caprin2/gene-LOC122869242/gene-LOC122869735/gene-LOC122869738/gene-LOC122877917/gene-LOC122881519/gene-parvb/gene-pdzph1	7
BP	GO:1901987	regulation of cell cycle phase transition	2/430	53/11595	0.590196631347453	0.900460599218545	gene-LOC122877917/gene-LOC122865952	2	LOC122865952/LOC122877917	1	gene-LOC122877917	1
BP	GO:0051240	positive regulation of multicellular organismal process	5/430	139/11595	0.591116672572193	0.900899741620722	gene-LOC122877917/gene-apln/gene-zbtb46/gene-mrtfbb/gene-caprin2	5	apln/caprin2/LOC122877917/mrtfbb/zbtb46	3	gene-apln/gene-caprin2/gene-LOC122877917	2
BP	GO:0007417	central nervous system development	8/430	224/11595	0.594013198862076	0.901575502380493	gene-reln/gene-rfx4/gene-znf703/gene-ndnf/gene-omgb/gene-grhl2b/gene-pard6gb/gene-mrtfbb	8	grhl2b/mrtfbb/ndnf/omgb/pard6gb/reln/rfx4/znf703	3	gene-grhl2b/gene-omgb/gene-rfx4	5
BP	GO:0018022	peptidyl-lysine methylation	1/430	24/11595	0.59662154297881	0.901575502380493	gene-gfi1aa	1	gfi1aa	1	gene-gfi1aa	0
BP	GO:0031330	negative regulation of cellular catabolic process	1/430	24/11595	0.59662154297881	0.901575502380493	gene-tbc1d14	1	tbc1d14	1	gene-tbc1d14	0
BP	GO:0042113	B cell activation	1/430	24/11595	0.59662154297881	0.901575502380493	gene-swap70a	1	swap70a	0	-	1
BP	GO:0042558	pteridine-containing compound metabolic process	1/430	24/11595	0.59662154297881	0.901575502380493	gene-aldh1l2	1	aldh1l2	1	gene-aldh1l2	0
BP	GO:0055007	cardiac muscle cell differentiation	1/430	24/11595	0.59662154297881	0.901575502380493	gene-pdzph1	1	pdzph1	1	gene-pdzph1	0
BP	GO:0071214	cellular response to abiotic stimulus	1/430	24/11595	0.59662154297881	0.901575502380493	gene-snai2	1	snai2	0	-	1
BP	GO:0104004	cellular response to environmental stimulus	1/430	24/11595	0.59662154297881	0.901575502380493	gene-snai2	1	snai2	0	-	1
BP	GO:0030162	regulation of proteolysis	2/430	54/11595	0.600435640749752	0.905418823352801	gene-LOC122877917/gene-LOC122881737	2	LOC122877917/LOC122881737	1	gene-LOC122877917	1
BP	GO:0050954	sensory perception of mechanical stimulus	2/430	54/11595	0.600435640749752	0.905418823352801	gene-snai2/gene-myo15b	2	myo15b/snai2	1	gene-myo15b	1
BP	GO:0048015	phosphatidylinositol-mediated signaling	3/430	84/11595	0.607504357280496	0.906621955380267	gene-LOC122877917/gene-LOC122869242/gene-LOC122871413	3	LOC122869242/LOC122871413/LOC122877917	3	gene-LOC122869242/gene-LOC122871413/gene-LOC122877917	0
BP	GO:0009968	negative regulation of signal transduction	11/430	311/11595	0.607639639394391	0.906621955380267	gene-LOC122877917/gene-pid1/gene-si:ch211-39i2.2/gene-LOC122884781/gene-LOC122884881/gene-snai2/gene-LOC122865952/gene-bambia/gene-nog2/gene-LOC122869242/gene-LOC122871826	11	bambia/LOC122865952/LOC122869242/LOC122871826/LOC122877917/LOC122884781/LOC122884881/nog2/pid1/si:ch211-39i2.2/snai2	4	gene-LOC122869242/gene-LOC122877917/gene-LOC122884781/gene-si:ch211-39i2.2	7
BP	GO:0002250	adaptive immune response	2/430	55/11595	0.610480959114856	0.906621955380267	gene-swap70a/gene-LOC122870587	2	LOC122870587/swap70a	1	gene-LOC122870587	1
BP	GO:0016051	carbohydrate biosynthetic process	2/430	55/11595	0.610480959114856	0.906621955380267	gene-fbp2/gene-pck2	2	fbp2/pck2	2	gene-fbp2/gene-pck2	0
BP	GO:0016197	endosomal transport	2/430	55/11595	0.610480959114856	0.906621955380267	gene-LOC122872091/gene-tbc1d14	2	LOC122872091/tbc1d14	1	gene-tbc1d14	1
BP	GO:0000077	DNA damage checkpoint	1/430	25/11595	0.611611840837173	0.906621955380267	gene-id2a	1	id2a	0	-	1
BP	GO:0001756	somitogenesis	1/430	25/11595	0.611611840837173	0.906621955380267	gene-LOC122869123	1	LOC122869123	1	gene-LOC122869123	0
BP	GO:0008217	regulation of blood pressure	1/430	25/11595	0.611611840837173	0.906621955380267	gene-apln	1	apln	1	gene-apln	0
BP	GO:0009072	aromatic amino acid family metabolic process	1/430	25/11595	0.611611840837173	0.906621955380267	gene-tph2	1	tph2	0	-	1
BP	GO:0010921	regulation of phosphatase activity	1/430	25/11595	0.611611840837173	0.906621955380267	gene-zgc:92242	1	zgc:92242	1	gene-zgc:92242	0
BP	GO:0017148	negative regulation of translation	1/430	25/11595	0.611611840837173	0.906621955380267	gene-caprin2	1	caprin2	1	gene-caprin2	0
BP	GO:0034249	negative regulation of cellular amide metabolic process	1/430	25/11595	0.611611840837173	0.906621955380267	gene-caprin2	1	caprin2	1	gene-caprin2	0
BP	GO:0043409	negative regulation of MAPK cascade	1/430	25/11595	0.611611840837173	0.906621955380267	gene-LOC122877917	1	LOC122877917	1	gene-LOC122877917	0
BP	GO:0046173	polyol biosynthetic process	1/430	25/11595	0.611611840837173	0.906621955380267	gene-itpkcb	1	itpkcb	0	-	1
BP	GO:0061515	myeloid cell development	1/430	25/11595	0.611611840837173	0.906621955380267	gene-LOC122869123	1	LOC122869123	1	gene-LOC122869123	0
BP	GO:0007601	visual perception	4/430	114/11595	0.615070339368694	0.906621955380267	gene-LOC122887291/gene-parapinopsina/gene-cryba2b/gene-LOC122862702	4	cryba2b/LOC122862702/LOC122887291/parapinopsina	4	gene-cryba2b/gene-LOC122862702/gene-LOC122887291/gene-parapinopsina	0
BP	GO:0006887	exocytosis	3/430	85/11595	0.615551558005702	0.906621955380267	gene-sytl4/gene-mroh1/gene-si:dkey-196h17.9	3	mroh1/si:dkey-196h17.9/sytl4	2	gene-mroh1/gene-si:dkey-196h17.9	1
BP	GO:0010562	positive regulation of phosphorus metabolic process	3/430	85/11595	0.615551558005702	0.906621955380267	gene-dok7b/gene-LOC122886518/gene-LOC122871413	3	dok7b/LOC122871413/LOC122886518	2	gene-LOC122871413/gene-LOC122886518	1
BP	GO:0045937	positive regulation of phosphate metabolic process	3/430	85/11595	0.615551558005702	0.906621955380267	gene-dok7b/gene-LOC122886518/gene-LOC122871413	3	dok7b/LOC122871413/LOC122886518	2	gene-LOC122871413/gene-LOC122886518	1
BP	GO:0050673	epithelial cell proliferation	3/430	85/11595	0.615551558005702	0.906621955380267	gene-amotl2a/gene-snai2/gene-LOC122869242	3	amotl2a/LOC122869242/snai2	1	gene-LOC122869242	2
BP	GO:0008610	lipid biosynthetic process	7/430	200/11595	0.615833061324916	0.906621955380267	gene-ddit3/gene-elovl5/gene-snai2/gene-acaca/gene-lpin1b/gene-ch25h/gene-LOC122871599	7	acaca/ch25h/ddit3/elovl5/LOC122871599/lpin1b/snai2	6	gene-acaca/gene-ch25h/gene-ddit3/gene-elovl5/gene-LOC122871599/gene-lpin1b	1
BP	GO:0010648	negative regulation of cell communication	11/430	313/11595	0.616167793825066	0.906621955380267	gene-LOC122877917/gene-pid1/gene-si:ch211-39i2.2/gene-LOC122884781/gene-LOC122884881/gene-snai2/gene-LOC122865952/gene-bambia/gene-nog2/gene-LOC122869242/gene-LOC122871826	11	bambia/LOC122865952/LOC122869242/LOC122871826/LOC122877917/LOC122884781/LOC122884881/nog2/pid1/si:ch211-39i2.2/snai2	4	gene-LOC122869242/gene-LOC122877917/gene-LOC122884781/gene-si:ch211-39i2.2	7
BP	GO:0023057	negative regulation of signaling	11/430	313/11595	0.616167793825066	0.906621955380267	gene-LOC122877917/gene-pid1/gene-si:ch211-39i2.2/gene-LOC122884781/gene-LOC122884881/gene-snai2/gene-LOC122865952/gene-bambia/gene-nog2/gene-LOC122869242/gene-LOC122871826	11	bambia/LOC122865952/LOC122869242/LOC122871826/LOC122877917/LOC122884781/LOC122884881/nog2/pid1/si:ch211-39i2.2/snai2	4	gene-LOC122869242/gene-LOC122877917/gene-LOC122884781/gene-si:ch211-39i2.2	7
BP	GO:0051241	negative regulation of multicellular organismal process	6/430	172/11595	0.618494138982697	0.906621955380267	gene-LOC122877917/gene-zbtb46/gene-snai2/gene-LOC122869242/gene-lrrc17/gene-tafa5a	6	LOC122869242/LOC122877917/lrrc17/snai2/tafa5a/zbtb46	2	gene-LOC122869242/gene-LOC122877917	4
BP	GO:0048593	camera-type eye morphogenesis	2/430	56/11595	0.620332837881172	0.906621955380267	gene-znf703/gene-rpgrb	2	rpgrb/znf703	0	-	2
BP	GO:0051604	protein maturation	2/430	56/11595	0.620332837881172	0.906621955380267	gene-plat/gene-LOC122871823	2	LOC122871823/plat	1	gene-plat	1
BP	GO:0061371	determination of heart left/right asymmetry	2/430	56/11595	0.620332837881172	0.906621955380267	gene-skib/gene-apln	2	apln/skib	1	gene-apln	1
BP	GO:0009895	negative regulation of catabolic process	1/430	26/11595	0.626046318662585	0.906621955380267	gene-tbc1d14	1	tbc1d14	1	gene-tbc1d14	0
BP	GO:0016331	morphogenesis of embryonic epithelium	1/430	26/11595	0.626046318662585	0.906621955380267	gene-pard6gb	1	pard6gb	0	-	1
BP	GO:0016571	histone methylation	1/430	26/11595	0.626046318662585	0.906621955380267	gene-gfi1aa	1	gfi1aa	1	gene-gfi1aa	0
BP	GO:0022898	regulation of transmembrane transporter activity	1/430	26/11595	0.626046318662585	0.906621955380267	gene-gem	1	gem	1	gene-gem	0
BP	GO:0032412	regulation of ion transmembrane transporter activity	1/430	26/11595	0.626046318662585	0.906621955380267	gene-gem	1	gem	1	gene-gem	0
BP	GO:0042278	purine nucleoside metabolic process	1/430	26/11595	0.626046318662585	0.906621955380267	gene-macrod1	1	macrod1	1	gene-macrod1	0
BP	GO:0042398	cellular modified amino acid biosynthetic process	1/430	26/11595	0.626046318662585	0.906621955380267	gene-LOC122874604	1	LOC122874604	0	-	1
BP	GO:0042461	photoreceptor cell development	1/430	26/11595	0.626046318662585	0.906621955380267	gene-rpgrb	1	rpgrb	0	-	1
BP	GO:0043094	cellular metabolic compound salvage	1/430	26/11595	0.626046318662585	0.906621955380267	gene-ampd3a	1	ampd3a	0	-	1
BP	GO:0045926	negative regulation of growth	1/430	26/11595	0.626046318662585	0.906621955380267	gene-osgin2	1	osgin2	1	gene-osgin2	0
BP	GO:0072175	epithelial tube formation	1/430	26/11595	0.626046318662585	0.906621955380267	gene-pard6gb	1	pard6gb	0	-	1
BP	GO:1902600	proton transmembrane transport	1/430	26/11595	0.626046318662585	0.906621955380267	gene-LOC122870126	1	LOC122870126	1	gene-LOC122870126	0
BP	GO:0048017	inositol lipid-mediated signaling	3/430	87/11595	0.631309830212985	0.912835228659821	gene-LOC122877917/gene-LOC122869242/gene-LOC122871413	3	LOC122869242/LOC122871413/LOC122877917	3	gene-LOC122869242/gene-LOC122871413/gene-LOC122877917	0
BP	GO:0044093	positive regulation of molecular function	12/430	345/11595	0.632027481882537	0.912835228659821	gene-dok7b/gene-arhgap25/gene-sgsm1a/gene-LOC122877917/gene-LOC122881737/gene-rasgrp3/gene-asap1a/gene-arhgap24/gene-si:dkey-191m6.4/gene-rundc1/gene-tbc1d14/gene-tbc1d30	12	arhgap24/arhgap25/asap1a/dok7b/LOC122877917/LOC122881737/rasgrp3/rundc1/sgsm1a/si:dkey-191m6.4/tbc1d14/tbc1d30	9	gene-arhgap25/gene-asap1a/gene-LOC122877917/gene-rasgrp3/gene-rundc1/gene-sgsm1a/gene-si:dkey-191m6.4/gene-tbc1d14/gene-tbc1d30	3
BP	GO:0048878	chemical homeostasis	5/430	146/11595	0.634673759667662	0.912835228659821	gene-swap70a/gene-LOC122881776/gene-LOC122881039/gene-slc31a2/gene-LOC122868396	5	LOC122868396/LOC122881039/LOC122881776/slc31a2/swap70a	3	gene-LOC122868396/gene-LOC122881776/gene-slc31a2	2
BP	GO:0006302	double-strand break repair	2/430	58/11595	0.639458499886995	0.912835228659821	gene-LOC122871826/gene-nhej1	2	LOC122871826/nhej1	0	-	2
BP	GO:0006354	DNA-templated transcription, elongation	1/430	27/11595	0.639945539249938	0.912835228659821	gene-LOC122880569	1	LOC122880569	1	gene-LOC122880569	0
BP	GO:0006874	cellular calcium ion homeostasis	1/430	27/11595	0.639945539249938	0.912835228659821	gene-swap70a	1	swap70a	0	-	1
BP	GO:0010810	regulation of cell-substrate adhesion	1/430	27/11595	0.639945539249938	0.912835228659821	gene-ndnf	1	ndnf	0	-	1
BP	GO:0031570	DNA integrity checkpoint	1/430	27/11595	0.639945539249938	0.912835228659821	gene-id2a	1	id2a	0	-	1
BP	GO:0035162	embryonic hemopoiesis	1/430	27/11595	0.639945539249938	0.912835228659821	gene-cebpa	1	cebpa	1	gene-cebpa	0
BP	GO:0046942	carboxylic acid transport	1/430	27/11595	0.639945539249938	0.912835228659821	gene-LOC122871427	1	LOC122871427	1	gene-LOC122871427	0
BP	GO:0048608	reproductive structure development	1/430	27/11595	0.639945539249938	0.912835228659821	gene-tnca	1	tnca	0	-	1
BP	GO:0061458	reproductive system development	1/430	27/11595	0.639945539249938	0.912835228659821	gene-tnca	1	tnca	0	-	1
BP	GO:0070588	calcium ion transmembrane transport	1/430	27/11595	0.639945539249938	0.912835228659821	gene-gem	1	gem	1	gene-gem	0
BP	GO:0085029	extracellular matrix assembly	1/430	27/11595	0.639945539249938	0.912835228659821	gene-lamb3	1	lamb3	1	gene-lamb3	0
BP	GO:1901214	regulation of neuron death	1/430	27/11595	0.639945539249938	0.912835228659821	gene-ndnf	1	ndnf	0	-	1
BP	GO:0050953	sensory perception of light stimulus	4/430	118/11595	0.642152551902388	0.915067386460903	gene-LOC122887291/gene-parapinopsina/gene-cryba2b/gene-LOC122862702	4	cryba2b/LOC122862702/LOC122887291/parapinopsina	4	gene-cryba2b/gene-LOC122862702/gene-LOC122887291/gene-parapinopsina	0
BP	GO:0051493	regulation of cytoskeleton organization	6/430	177/11595	0.646150941842308	0.919845246878411	gene-swap70a/gene-LOC122885147/gene-fmn2a/gene-LOC122861414/gene-fmn1/gene-eps8a	6	eps8a/fmn1/fmn2a/LOC122861414/LOC122885147/swap70a	4	gene-eps8a/gene-fmn1/gene-LOC122861414/gene-LOC122885147	2
BP	GO:0050680	negative regulation of epithelial cell proliferation	2/430	59/11595	0.648733948755674	0.921680834473415	gene-snai2/gene-LOC122869242	2	LOC122869242/snai2	1	gene-LOC122869242	1
BP	GO:0098656	anion transmembrane transport	2/430	59/11595	0.648733948755674	0.921680834473415	gene-slc12a5a/gene-LOC122871427	2	LOC122871427/slc12a5a	2	gene-LOC122871427/gene-slc12a5a	0
BP	GO:0032879	regulation of localization	16/430	463/11595	0.651415970789549	0.921776496620609	gene-swap70a/gene-nsmfb/gene-podn/gene-LOC122877917/gene-LOC122881975/gene-LOC122881976/gene-osgin2/gene-gem/gene-snai2/gene-kcnj15/gene-kcnj1b/gene-kcnj2a/gene-si:ch211-278a6.1/gene-LOC122871413/gene-sapcd1/gene-tafa5a	16	gem/kcnj15/kcnj1b/kcnj2a/LOC122871413/LOC122877917/LOC122881975/LOC122881976/nsmfb/osgin2/podn/sapcd1/si:ch211-278a6.1/snai2/swap70a/tafa5a	11	gene-gem/gene-kcnj2a/gene-LOC122871413/gene-LOC122877917/gene-LOC122881975/gene-LOC122881976/gene-nsmfb/gene-osgin2/gene-podn/gene-sapcd1/gene-si:ch211-278a6.1	5
BP	GO:0007416	synapse assembly	1/430	28/11595	0.653329306376712	0.921776496620609	gene-pclob	1	pclob	1	gene-pclob	0
BP	GO:0035051	cardiocyte differentiation	1/430	28/11595	0.653329306376712	0.921776496620609	gene-pdzph1	1	pdzph1	1	gene-pdzph1	0
BP	GO:0035107	appendage morphogenesis	1/430	28/11595	0.653329306376712	0.921776496620609	gene-itga3b	1	itga3b	1	gene-itga3b	0
BP	GO:0035148	tube formation	1/430	28/11595	0.653329306376712	0.921776496620609	gene-pard6gb	1	pard6gb	0	-	1
BP	GO:0042147	retrograde transport, endosome to Golgi	1/430	28/11595	0.653329306376712	0.921776496620609	gene-tbc1d14	1	tbc1d14	1	gene-tbc1d14	0
BP	GO:0070997	neuron death	1/430	28/11595	0.653329306376712	0.921776496620609	gene-ndnf	1	ndnf	0	-	1
BP	GO:0009952	anterior/posterior pattern specification	2/430	60/11595	0.657819255136844	0.924514479376526	gene-grhl2b/gene-LOC122869123	2	grhl2b/LOC122869123	2	gene-grhl2b/gene-LOC122869123	0
BP	GO:0032088	negative regulation of NF-kappaB transcription factor activity	2/430	60/11595	0.657819255136844	0.924514479376526	gene-LOC122877917/gene-LOC122869242	2	LOC122869242/LOC122877917	2	gene-LOC122869242/gene-LOC122877917	0
BP	GO:0043086	negative regulation of catalytic activity	2/430	60/11595	0.657819255136844	0.924514479376526	gene-LOC122877917/gene-zgc:92242	2	LOC122877917/zgc:92242	2	gene-LOC122877917/gene-zgc:92242	0
BP	GO:0001654	eye development	5/430	151/11595	0.663988335312772	0.924514479376526	gene-znf703/gene-LOC122877917/gene-cryba2b/gene-id2a/gene-rpgrb	5	cryba2b/id2a/LOC122877917/rpgrb/znf703	2	gene-cryba2b/gene-LOC122877917	3
BP	GO:0150063	visual system development	5/430	151/11595	0.663988335312772	0.924514479376526	gene-znf703/gene-LOC122877917/gene-cryba2b/gene-id2a/gene-rpgrb	5	cryba2b/id2a/LOC122877917/rpgrb/znf703	2	gene-cryba2b/gene-LOC122877917	3
BP	GO:0006099	tricarboxylic acid cycle	1/430	29/11595	0.66621669275676	0.924514479376526	gene-LOC122882574	1	LOC122882574	1	gene-LOC122882574	0
BP	GO:0007188	adenylate cyclase-modulating G protein-coupled receptor signaling pathway	1/430	29/11595	0.66621669275676	0.924514479376526	gene-gnao1b	1	gnao1b	0	-	1
BP	GO:0032409	regulation of transporter activity	1/430	29/11595	0.66621669275676	0.924514479376526	gene-gem	1	gem	1	gene-gem	0
BP	GO:0033333	fin development	1/430	29/11595	0.66621669275676	0.924514479376526	gene-itga3b	1	itga3b	1	gene-itga3b	0
BP	GO:0072503	cellular divalent inorganic cation homeostasis	1/430	29/11595	0.66621669275676	0.924514479376526	gene-swap70a	1	swap70a	0	-	1
BP	GO:1903037	regulation of leukocyte cell-cell adhesion	1/430	29/11595	0.66621669275676	0.924514479376526	gene-LOC122877917	1	LOC122877917	1	gene-LOC122877917	0
BP	GO:1904062	regulation of cation transmembrane transport	1/430	29/11595	0.66621669275676	0.924514479376526	gene-gem	1	gem	1	gene-gem	0
BP	GO:0043009	chordate embryonic development	7/430	210/11595	0.666473516805143	0.924514479376526	gene-LOC122877917/gene-grhl2b/gene-pard6gb/gene-LOC122869123/gene-rundc1/gene-mrtfbb/gene-pthlha	7	grhl2b/LOC122869123/LOC122877917/mrtfbb/pard6gb/pthlha/rundc1	4	gene-grhl2b/gene-LOC122869123/gene-LOC122877917/gene-rundc1	3
BP	GO:0030900	forebrain development	2/430	61/11595	0.666715730680751	0.924514479376526	gene-ndnf/gene-mrtfbb	2	mrtfbb/ndnf	0	-	2
BP	GO:0010604	positive regulation of macromolecule metabolic process	16/430	468/11595	0.668175182991894	0.924514479376526	gene-dok7b/gene-znf703/gene-LOC122877917/gene-otx5/gene-LOC122880569/gene-LOC122881737/gene-rel/gene-snai2/gene-LOC122886518/gene-mef2ca/gene-tnca/gene-wbp2/gene-mrtfbb/gene-cbx8a/gene-LOC122871423/gene-LOC122871413	16	cbx8a/dok7b/LOC122871413/LOC122871423/LOC122877917/LOC122880569/LOC122881737/LOC122886518/mef2ca/mrtfbb/otx5/rel/snai2/tnca/wbp2/znf703	9	gene-LOC122871413/gene-LOC122871423/gene-LOC122877917/gene-LOC122880569/gene-LOC122886518/gene-mef2ca/gene-otx5/gene-rel/gene-wbp2	7
BP	GO:0009792	embryo development ending in birth or egg hatching	7/430	211/11595	0.671306711263854	0.924514479376526	gene-LOC122877917/gene-grhl2b/gene-pard6gb/gene-LOC122869123/gene-rundc1/gene-mrtfbb/gene-pthlha	7	grhl2b/LOC122869123/LOC122877917/mrtfbb/pard6gb/pthlha/rundc1	4	gene-grhl2b/gene-LOC122869123/gene-LOC122877917/gene-rundc1	3
BP	GO:0043065	positive regulation of apoptotic process	2/430	62/11595	0.675424851108513	0.924514479376526	gene-osgin2/gene-phlda1	2	osgin2/phlda1	1	gene-osgin2	1
BP	GO:0043068	positive regulation of programmed cell death	2/430	62/11595	0.675424851108513	0.924514479376526	gene-osgin2/gene-phlda1	2	osgin2/phlda1	1	gene-osgin2	1
BP	GO:0043433	negative regulation of DNA-binding transcription factor activity	2/430	62/11595	0.675424851108513	0.924514479376526	gene-LOC122877917/gene-LOC122869242	2	LOC122869242/LOC122877917	2	gene-LOC122869242/gene-LOC122877917	0
BP	GO:0046578	regulation of Ras protein signal transduction	2/430	62/11595	0.675424851108513	0.924514479376526	gene-arfgef3/gene-LOC122865952	2	arfgef3/LOC122865952	1	gene-arfgef3	1
BP	GO:0031328	positive regulation of cellular biosynthetic process	9/430	270/11595	0.675575124980943	0.924514479376526	gene-ddah1/gene-LOC122877917/gene-otx5/gene-LOC122880569/gene-rel/gene-LOC122886518/gene-mef2ca/gene-mrtfbb/gene-LOC122871423	9	ddah1/LOC122871423/LOC122877917/LOC122880569/LOC122886518/mef2ca/mrtfbb/otx5/rel	7	gene-LOC122871423/gene-LOC122877917/gene-LOC122880569/gene-LOC122886518/gene-mef2ca/gene-otx5/gene-rel	2
BP	GO:0031329	regulation of cellular catabolic process	3/430	93/11595	0.675862633435829	0.924514479376526	gene-ctns/gene-LOC122886528/gene-tbc1d14	3	ctns/LOC122886528/tbc1d14	3	gene-ctns/gene-LOC122886528/gene-tbc1d14	0
BP	GO:0001933	negative regulation of protein phosphorylation	1/430	30/11595	0.67862606696691	0.924514479376526	gene-LOC122886518	1	LOC122886518	1	gene-LOC122886518	0
BP	GO:0002011	morphogenesis of an epithelial sheet	1/430	30/11595	0.67862606696691	0.924514479376526	gene-snai2	1	snai2	0	-	1
BP	GO:0005977	glycogen metabolic process	1/430	30/11595	0.67862606696691	0.924514479376526	gene-pygl	1	pygl	1	gene-pygl	0
BP	GO:0006073	cellular glucan metabolic process	1/430	30/11595	0.67862606696691	0.924514479376526	gene-pygl	1	pygl	1	gene-pygl	0
BP	GO:0006112	energy reserve metabolic process	1/430	30/11595	0.67862606696691	0.924514479376526	gene-pygl	1	pygl	1	gene-pygl	0
BP	GO:0007269	neurotransmitter secretion	1/430	30/11595	0.67862606696691	0.924514479376526	gene-LOC122871213	1	LOC122871213	0	-	1
BP	GO:0008037	cell recognition	1/430	30/11595	0.67862606696691	0.924514479376526	gene-LOC122888546	1	LOC122888546	0	-	1
BP	GO:0009142	nucleoside triphosphate biosynthetic process	1/430	30/11595	0.67862606696691	0.924514479376526	gene-cmpk2	1	cmpk2	1	gene-cmpk2	0
BP	GO:0010927	cellular component assembly involved in morphogenesis	1/430	30/11595	0.67862606696691	0.924514479376526	gene-lrrc39	1	lrrc39	1	gene-lrrc39	0
BP	GO:0044042	glucan metabolic process	1/430	30/11595	0.67862606696691	0.924514479376526	gene-pygl	1	pygl	1	gene-pygl	0
BP	GO:0044264	cellular polysaccharide metabolic process	1/430	30/11595	0.67862606696691	0.924514479376526	gene-pygl	1	pygl	1	gene-pygl	0
BP	GO:0055074	calcium ion homeostasis	1/430	30/11595	0.67862606696691	0.924514479376526	gene-swap70a	1	swap70a	0	-	1
BP	GO:0099643	signal release from synapse	1/430	30/11595	0.67862606696691	0.924514479376526	gene-LOC122871213	1	LOC122871213	0	-	1
BP	GO:2001233	regulation of apoptotic signaling pathway	1/430	30/11595	0.67862606696691	0.924514479376526	gene-snai2	1	snai2	0	-	1
BP	GO:0045597	positive regulation of cell differentiation	3/430	94/11595	0.682889212835963	0.92836749539837	gene-zbtb46/gene-snai2/gene-LOC122887176	3	LOC122887176/snai2/zbtb46	0	-	3
BP	GO:0080134	regulation of response to stress	7/430	214/11595	0.685544872661582	0.92836749539837	gene-LOC122878212/gene-LOC122877917/gene-omgb/gene-snai2/gene-cbx8a/gene-LOC122869242/gene-tafa5a	7	cbx8a/LOC122869242/LOC122877917/LOC122878212/omgb/snai2/tafa5a	4	gene-LOC122869242/gene-LOC122877917/gene-LOC122878212/gene-omgb	3
BP	GO:0006468	protein phosphorylation	4/430	125/11595	0.686460786961504	0.92836749539837	gene-dok7b/gene-LOC122886518/gene-LOC122869123/gene-LOC122871413	4	dok7b/LOC122869123/LOC122871413/LOC122886518	3	gene-LOC122869123/gene-LOC122871413/gene-LOC122886518	1
BP	GO:0006897	endocytosis	4/430	125/11595	0.686460786961504	0.92836749539837	gene-pstpip1b/gene-LOC122888184/gene-lrp13/gene-LOC122870595	4	LOC122870595/LOC122888184/lrp13/pstpip1b	3	gene-LOC122888184/gene-lrp13/gene-pstpip1b	1
BP	GO:0040008	regulation of growth	3/430	95/11595	0.689801995454153	0.92836749539837	gene-omgb/gene-osgin2/gene-pard6gb	3	omgb/osgin2/pard6gb	2	gene-omgb/gene-osgin2	1
BP	GO:0005976	polysaccharide metabolic process	1/430	31/11595	0.69057511938405	0.92836749539837	gene-pygl	1	pygl	1	gene-pygl	0
BP	GO:0007052	mitotic spindle organization	1/430	31/11595	0.69057511938405	0.92836749539837	gene-tacc2	1	tacc2	1	gene-tacc2	0
BP	GO:0007292	female gamete generation	1/430	31/11595	0.69057511938405	0.92836749539837	gene-pgr	1	pgr	0	-	1
BP	GO:0009798	axis specification	1/430	31/11595	0.69057511938405	0.92836749539837	gene-caprin2	1	caprin2	1	gene-caprin2	0
BP	GO:0018394	peptidyl-lysine acetylation	1/430	31/11595	0.69057511938405	0.92836749539837	gene-snai2	1	snai2	0	-	1
BP	GO:0045862	positive regulation of proteolysis	1/430	31/11595	0.69057511938405	0.92836749539837	gene-LOC122881737	1	LOC122881737	0	-	1
BP	GO:0050803	regulation of synapse structure or activity	1/430	31/11595	0.69057511938405	0.92836749539837	gene-si:ch211-278a6.1	1	si:ch211-278a6.1	1	gene-si:ch211-278a6.1	0
BP	GO:0050807	regulation of synapse organization	1/430	31/11595	0.69057511938405	0.92836749539837	gene-si:ch211-278a6.1	1	si:ch211-278a6.1	1	gene-si:ch211-278a6.1	0
BP	GO:0060027	convergent extension involved in gastrulation	1/430	31/11595	0.69057511938405	0.92836749539837	gene-LOC122871826	1	LOC122871826	0	-	1
BP	GO:0031333	negative regulation of protein-containing complex assembly	3/430	96/11595	0.69660124555557	0.93326983602219	gene-LOC122885147/gene-LOC122869242/gene-eps8a	3	eps8a/LOC122869242/LOC122885147	3	gene-eps8a/gene-LOC122869242/gene-LOC122885147	0
BP	GO:0032259	methylation	5/430	157/11595	0.697093889215201	0.93326983602219	gene-LOC122876938/gene-pmt/gene-gfi1aa/gene-prdm1b/gene-eef2kmt	5	eef2kmt/gfi1aa/LOC122876938/pmt/prdm1b	4	gene-gfi1aa/gene-LOC122876938/gene-pmt/gene-prdm1b	1
BP	GO:0120031	plasma membrane bounded cell projection assembly	6/430	187/11595	0.69769556249189	0.93326983602219	gene-odad3/gene-mtss1la/gene-znf703/gene-vdac3/gene-amotl2a/gene-rpgrb	6	amotl2a/mtss1la/odad3/rpgrb/vdac3/znf703	1	gene-vdac3	5
BP	GO:0048589	developmental growth	4/430	127/11595	0.698385969717847	0.93326983602219	gene-ccn1/gene-omgb/gene-pard6gb/gene-tnca	4	ccn1/omgb/pard6gb/tnca	1	gene-omgb	3
BP	GO:0048762	mesenchymal cell differentiation	2/430	65/11595	0.700445013343181	0.93326983602219	gene-snai1a/gene-snai2	2	snai1a/snai2	0	-	2
BP	GO:0098662	inorganic cation transmembrane transport	2/430	65/11595	0.700445013343181	0.93326983602219	gene-LOC122870126/gene-gem	2	gem/LOC122870126	2	gene-gem/gene-LOC122870126	0
BP	GO:0006470	protein dephosphorylation	1/430	32/11595	0.702080887168974	0.93326983602219	gene-swap70a	1	swap70a	0	-	1
BP	GO:0007159	leukocyte cell-cell adhesion	1/430	32/11595	0.702080887168974	0.93326983602219	gene-LOC122877917	1	LOC122877917	1	gene-LOC122877917	0
BP	GO:0043484	regulation of RNA splicing	1/430	32/11595	0.702080887168974	0.93326983602219	gene-rbfox1	1	rbfox1	1	gene-rbfox1	0
BP	GO:0045785	positive regulation of cell adhesion	1/430	32/11595	0.702080887168974	0.93326983602219	gene-ndnf	1	ndnf	0	-	1
BP	GO:0071897	DNA biosynthetic process	1/430	32/11595	0.702080887168974	0.93326983602219	gene-LOC122877917	1	LOC122877917	1	gene-LOC122877917	0
BP	GO:0072507	divalent inorganic cation homeostasis	1/430	32/11595	0.702080887168974	0.93326983602219	gene-swap70a	1	swap70a	0	-	1
BP	GO:0051640	organelle localization	3/430	97/11595	0.703287307547823	0.934002249073297	gene-LOC122885551/gene-LOC122886528/gene-sapcd1	3	LOC122885551/LOC122886528/sapcd1	3	gene-LOC122885551/gene-LOC122886528/gene-sapcd1	0
BP	GO:0001775	cell activation	5/430	159/11595	0.707617399430419	0.936458025174481	gene-swap70a/gene-LOC122873767/gene-wdfy4/gene-ndrg1a/gene-LOC122869242	5	LOC122869242/LOC122873767/ndrg1a/swap70a/wdfy4	4	gene-LOC122869242/gene-LOC122873767/gene-ndrg1a/gene-wdfy4	1
BP	GO:1903047	mitotic cell cycle process	5/430	159/11595	0.707617399430419	0.936458025174481	gene-LOC122877917/gene-tacc2/gene-id2a/gene-LOC122865952/gene-sapcd1	5	id2a/LOC122865952/LOC122877917/sapcd1/tacc2	3	gene-LOC122877917/gene-sapcd1/gene-tacc2	2
BP	GO:0010942	positive regulation of cell death	2/430	66/11595	0.708422281500415	0.936458025174481	gene-osgin2/gene-phlda1	2	osgin2/phlda1	1	gene-osgin2	1
BP	GO:0031400	negative regulation of protein modification process	2/430	66/11595	0.708422281500415	0.936458025174481	gene-swap70a/gene-LOC122886518	2	LOC122886518/swap70a	1	gene-LOC122886518	1
BP	GO:1901222	regulation of NIK/NF-kappaB signaling	2/430	66/11595	0.708422281500415	0.936458025174481	gene-uacab/gene-LOC122869242	2	LOC122869242/uacab	1	gene-LOC122869242	1
BP	GO:0002683	negative regulation of immune system process	3/430	98/11595	0.709860601809226	0.936621627387174	gene-zbtb46/gene-LOC122869242/gene-lrrc17	3	LOC122869242/lrrc17/zbtb46	1	gene-LOC122869242	2
BP	GO:0006631	fatty acid metabolic process	3/430	98/11595	0.709860601809226	0.936621627387174	gene-elovl5/gene-acaca/gene-lpin1b	3	acaca/elovl5/lpin1b	3	gene-acaca/gene-elovl5/gene-lpin1b	0
BP	GO:0001947	heart looping	1/430	33/11595	0.713159778331937	0.936638418546553	gene-skib	1	skib	0	-	1
BP	GO:0014902	myotube differentiation	1/430	33/11595	0.713159778331937	0.936638418546553	gene-myofl	1	myofl	0	-	1
BP	GO:0022900	electron transport chain	1/430	33/11595	0.713159778331937	0.936638418546553	gene-LOC122869272	1	LOC122869272	1	gene-LOC122869272	0
BP	GO:0051693	actin filament capping	1/430	33/11595	0.713159778331937	0.936638418546553	gene-eps8a	1	eps8a	1	gene-eps8a	0
BP	GO:0120032	regulation of plasma membrane bounded cell projection assembly	1/430	33/11595	0.713159778331937	0.936638418546553	gene-vdac3	1	vdac3	1	gene-vdac3	0
BP	GO:0010608	posttranscriptional regulation of gene expression	4/430	130/11595	0.715658743223839	0.936856720060351	gene-LOC122888945/gene-LOC122886518/gene-rc3h2/gene-caprin2	4	caprin2/LOC122886518/LOC122888945/rc3h2	4	gene-caprin2/gene-LOC122886518/gene-LOC122888945/gene-rc3h2	0
BP	GO:0010639	negative regulation of organelle organization	3/430	99/11595	0.716321620636988	0.936856720060351	gene-swap70a/gene-LOC122885147/gene-eps8a	3	eps8a/LOC122885147/swap70a	2	gene-eps8a/gene-LOC122885147	1
BP	GO:0090596	sensory organ morphogenesis	3/430	99/11595	0.716321620636988	0.936856720060351	gene-znf703/gene-id2a/gene-rpgrb	3	id2a/rpgrb/znf703	0	-	3
BP	GO:0019220	regulation of phosphate metabolic process	5/430	161/11595	0.717883313056092	0.936856720060351	gene-swap70a/gene-dok7b/gene-zgc:92242/gene-LOC122886518/gene-LOC122871413	5	dok7b/LOC122871413/LOC122886518/swap70a/zgc:92242	3	gene-LOC122871413/gene-LOC122886518/gene-zgc:92242	2
BP	GO:0051174	regulation of phosphorus metabolic process	5/430	161/11595	0.717883313056092	0.936856720060351	gene-swap70a/gene-dok7b/gene-zgc:92242/gene-LOC122886518/gene-LOC122871413	5	dok7b/LOC122871413/LOC122886518/swap70a/zgc:92242	3	gene-LOC122871413/gene-LOC122886518/gene-zgc:92242	2
BP	GO:0048585	negative regulation of response to stimulus	12/430	369/11595	0.720919448262887	0.936856720060351	gene-LOC122877917/gene-pid1/gene-si:ch211-39i2.2/gene-LOC122884781/gene-LOC122884881/gene-snai2/gene-LOC122865952/gene-bambia/gene-nog2/gene-LOC122869242/gene-tafa5a/gene-LOC122871826	12	bambia/LOC122865952/LOC122869242/LOC122871826/LOC122877917/LOC122884781/LOC122884881/nog2/pid1/si:ch211-39i2.2/snai2/tafa5a	4	gene-LOC122869242/gene-LOC122877917/gene-LOC122884781/gene-si:ch211-39i2.2	8
BP	GO:0006417	regulation of translation	3/430	100/11595	0.722670924315045	0.936856720060351	gene-LOC122888945/gene-LOC122886518/gene-caprin2	3	caprin2/LOC122886518/LOC122888945	3	gene-caprin2/gene-LOC122886518/gene-LOC122888945	0
BP	GO:0002449	lymphocyte mediated immunity	1/430	34/11595	0.723827594913607	0.936856720060351	gene-swap70a	1	swap70a	0	-	1
BP	GO:0003407	neural retina development	1/430	34/11595	0.723827594913607	0.936856720060351	gene-rpgrb	1	rpgrb	0	-	1
BP	GO:0006576	cellular biogenic amine metabolic process	1/430	34/11595	0.723827594913607	0.936856720060351	gene-ddc	1	ddc	1	gene-ddc	0
BP	GO:0007498	mesoderm development	1/430	34/11595	0.723827594913607	0.936856720060351	gene-apln	1	apln	1	gene-apln	0
BP	GO:0015711	organic anion transport	1/430	34/11595	0.723827594913607	0.936856720060351	gene-LOC122871427	1	LOC122871427	1	gene-LOC122871427	0
BP	GO:0035282	segmentation	1/430	34/11595	0.723827594913607	0.936856720060351	gene-LOC122869123	1	LOC122869123	1	gene-LOC122869123	0
BP	GO:0070371	ERK1 and ERK2 cascade	1/430	34/11595	0.723827594913607	0.936856720060351	gene-LOC122877917	1	LOC122877917	1	gene-LOC122877917	0
BP	GO:0070372	regulation of ERK1 and ERK2 cascade	1/430	34/11595	0.723827594913607	0.936856720060351	gene-LOC122877917	1	LOC122877917	1	gene-LOC122877917	0
BP	GO:0044772	mitotic cell cycle phase transition	2/430	68/11595	0.723845086867682	0.936856720060351	gene-LOC122877917/gene-LOC122865952	2	LOC122865952/LOC122877917	1	gene-LOC122877917	1
BP	GO:0030031	cell projection assembly	6/430	193/11595	0.726109848736579	0.937358303156119	gene-odad3/gene-mtss1la/gene-znf703/gene-vdac3/gene-amotl2a/gene-rpgrb	6	amotl2a/mtss1la/odad3/rpgrb/vdac3/znf703	1	gene-vdac3	5
BP	GO:0031399	regulation of protein modification process	8/430	253/11595	0.726580296734603	0.937358303156119	gene-swap70a/gene-dok7b/gene-znf703/gene-snai2/gene-gfi1aa/gene-LOC122886518/gene-LOC122869242/gene-LOC122871413	8	dok7b/gfi1aa/LOC122869242/LOC122871413/LOC122886518/snai2/swap70a/znf703	4	gene-gfi1aa/gene-LOC122869242/gene-LOC122871413/gene-LOC122886518	4
BP	GO:0033554	cellular response to stress	15/430	458/11595	0.727322194414838	0.937358303156119	gene-eya2/gene-ddit3/gene-LOC122877917/gene-omgb/gene-macrod1/gene-LOC122881737/gene-snai2/gene-LOC122886518/gene-id2a/gene-tnca/gene-LOC122868820/gene-cbx8a/gene-nfe2l1a/gene-LOC122871826/gene-nhej1	15	cbx8a/ddit3/eya2/id2a/LOC122868820/LOC122871826/LOC122877917/LOC122881737/LOC122886518/macrod1/nfe2l1a/nhej1/omgb/snai2/tnca	6	gene-ddit3/gene-LOC122877917/gene-LOC122886518/gene-macrod1/gene-nfe2l1a/gene-omgb	9
BP	GO:1901565	organonitrogen compound catabolic process	12/430	371/11595	0.727673553999571	0.937358303156119	gene-dut/gene-LOC122872164/gene-hal/gene-gda/gene-ddah1/gene-pde4ba/gene-pglyrp5/gene-smpdl3b/gene-enosf1/gene-hmox1a/gene-usp18/gene-aldh1l2	12	aldh1l2/ddah1/dut/enosf1/gda/hal/hmox1a/LOC122872164/pde4ba/pglyrp5/smpdl3b/usp18	7	gene-aldh1l2/gene-enosf1/gene-gda/gene-hal/gene-hmox1a/gene-LOC122872164/gene-usp18	5
BP	GO:0006091	generation of precursor metabolites and energy	5/430	163/11595	0.72789138225238	0.937358303156119	gene-h6pd/gene-LOC122883245/gene-LOC122882574/gene-pygl/gene-LOC122869272	5	h6pd/LOC122869272/LOC122882574/LOC122883245/pygl	5	gene-h6pd/gene-LOC122869272/gene-LOC122882574/gene-LOC122883245/gene-pygl	0
BP	GO:0009314	response to radiation	3/430	101/11595	0.728909137301057	0.937358303156119	gene-LOC122887291/gene-parapinopsina/gene-snai2	3	LOC122887291/parapinopsina/snai2	2	gene-LOC122887291/gene-parapinopsina	1
BP	GO:0002831	regulation of response to biotic stimulus	2/430	69/11595	0.73129509556799	0.937358303156119	gene-LOC122878212/gene-LOC122869242	2	LOC122869242/LOC122878212	2	gene-LOC122869242/gene-LOC122878212	0
BP	GO:0007409	axonogenesis	4/430	133/11595	0.732195593154364	0.937358303156119	gene-omgb/gene-myot/gene-LOC122888546/gene-pard6gb	4	LOC122888546/myot/omgb/pard6gb	2	gene-myot/gene-omgb	2
BP	GO:0007186	G protein-coupled receptor signaling pathway	5/430	164/11595	0.732798783859063	0.937358303156119	gene-gnao1b/gene-LOC122864683/gene-pgr/gene-si:dkey-172j4.3/gene-tafa5a	5	gnao1b/LOC122864683/pgr/si:dkey-172j4.3/tafa5a	2	gene-LOC122864683/gene-si:dkey-172j4.3	3
BP	GO:0006473	protein acetylation	1/430	35/11595	0.734099555313845	0.937358303156119	gene-snai2	1	snai2	0	-	1
BP	GO:0006479	protein methylation	1/430	35/11595	0.734099555313845	0.937358303156119	gene-gfi1aa	1	gfi1aa	1	gene-gfi1aa	0
BP	GO:0008203	cholesterol metabolic process	1/430	35/11595	0.734099555313845	0.937358303156119	gene-nfe2l1a	1	nfe2l1a	1	gene-nfe2l1a	0
BP	GO:0008213	protein alkylation	1/430	35/11595	0.734099555313845	0.937358303156119	gene-gfi1aa	1	gfi1aa	1	gene-gfi1aa	0
BP	GO:0044106	cellular amine metabolic process	1/430	35/11595	0.734099555313845	0.937358303156119	gene-ddc	1	ddc	1	gene-ddc	0
BP	GO:1901606	alpha-amino acid catabolic process	1/430	35/11595	0.734099555313845	0.937358303156119	gene-ddah1	1	ddah1	0	-	1
BP	GO:0034248	regulation of cellular amide metabolic process	3/430	102/11595	0.735036944531826	0.937714991904971	gene-LOC122888945/gene-LOC122886518/gene-caprin2	3	caprin2/LOC122886518/LOC122888945	3	gene-caprin2/gene-LOC122886518/gene-LOC122888945	0
BP	GO:0098655	cation transmembrane transport	2/430	70/11595	0.738573950487257	0.938692397735489	gene-LOC122870126/gene-gem	2	gem/LOC122870126	2	gene-gem/gene-LOC122870126	0
BP	GO:0005975	carbohydrate metabolic process	9/430	287/11595	0.742896285281993	0.938692397735489	gene-h6pd/gene-fbp2/gene-insb/gene-LOC122883245/gene-pygl/gene-galt/gene-pck2/gene-enosf1/gene-pfkfb3	9	enosf1/fbp2/galt/h6pd/insb/LOC122883245/pck2/pfkfb3/pygl	9	gene-enosf1/gene-fbp2/gene-galt/gene-h6pd/gene-insb/gene-LOC122883245/gene-pck2/gene-pfkfb3/gene-pygl	0
BP	GO:0003143	embryonic heart tube morphogenesis	1/430	36/11595	0.743990315799575	0.938692397735489	gene-skib	1	skib	0	-	1
BP	GO:0006606	protein import into nucleus	1/430	36/11595	0.743990315799575	0.938692397735489	gene-il12rb2l	1	il12rb2l	1	gene-il12rb2l	0
BP	GO:0009060	aerobic respiration	1/430	36/11595	0.743990315799575	0.938692397735489	gene-LOC122882574	1	LOC122882574	1	gene-LOC122882574	0
BP	GO:0042246	tissue regeneration	1/430	36/11595	0.743990315799575	0.938692397735489	gene-ccn1	1	ccn1	0	-	1
BP	GO:0042391	regulation of membrane potential	1/430	36/11595	0.743990315799575	0.938692397735489	gene-pid1	1	pid1	0	-	1
BP	GO:0048565	digestive tract development	1/430	36/11595	0.743990315799575	0.938692397735489	gene-pard6gb	1	pard6gb	0	-	1
BP	GO:0051170	import into nucleus	1/430	36/11595	0.743990315799575	0.938692397735489	gene-il12rb2l	1	il12rb2l	1	gene-il12rb2l	0
BP	GO:0060491	regulation of cell projection assembly	1/430	36/11595	0.743990315799575	0.938692397735489	gene-vdac3	1	vdac3	1	gene-vdac3	0
BP	GO:0061053	somite development	1/430	36/11595	0.743990315799575	0.938692397735489	gene-LOC122869123	1	LOC122869123	1	gene-LOC122869123	0
BP	GO:0062012	regulation of small molecule metabolic process	1/430	36/11595	0.743990315799575	0.938692397735489	gene-snai2	1	snai2	0	-	1
BP	GO:0001818	negative regulation of cytokine production	2/430	71/11595	0.745684066130929	0.938692397735489	gene-LOC122877917/gene-LOC122869242	2	LOC122869242/LOC122877917	2	gene-LOC122869242/gene-LOC122877917	0
BP	GO:0003012	muscle system process	2/430	71/11595	0.745684066130929	0.938692397735489	gene-LOC122877917/gene-LOC122863516	2	LOC122863516/LOC122877917	1	gene-LOC122877917	1
BP	GO:0038061	NIK/NF-kappaB signaling	2/430	71/11595	0.745684066130929	0.938692397735489	gene-uacab/gene-LOC122869242	2	LOC122869242/uacab	1	gene-LOC122869242	1
BP	GO:0045944	positive regulation of transcription by RNA polymerase II	5/430	168/11595	0.751786240355708	0.939420330263473	gene-LOC122877917/gene-LOC122880569/gene-mef2ca/gene-mrtfbb/gene-LOC122871423	5	LOC122871423/LOC122877917/LOC122880569/mef2ca/mrtfbb	4	gene-LOC122871423/gene-LOC122877917/gene-LOC122880569/gene-mef2ca	1
BP	GO:0006605	protein targeting	2/430	72/11595	0.752627913587087	0.939420330263473	gene-LOC122878347/gene-LOC122863926	2	LOC122863926/LOC122878347	2	gene-LOC122863926/gene-LOC122878347	0
BP	GO:0050678	regulation of epithelial cell proliferation	2/430	72/11595	0.752627913587087	0.939420330263473	gene-snai2/gene-LOC122869242	2	LOC122869242/snai2	1	gene-LOC122869242	1
BP	GO:0006261	DNA-dependent DNA replication	1/430	37/11595	0.753513991221859	0.939420330263473	gene-LOC122868820	1	LOC122868820	0	-	1
BP	GO:0006898	receptor-mediated endocytosis	1/430	37/11595	0.753513991221859	0.939420330263473	gene-LOC122870595	1	LOC122870595	0	-	1
BP	GO:0007266	Rho protein signal transduction	1/430	37/11595	0.753513991221859	0.939420330263473	gene-LOC122865952	1	LOC122865952	0	-	1
BP	GO:0009308	amine metabolic process	1/430	37/11595	0.753513991221859	0.939420330263473	gene-ddc	1	ddc	1	gene-ddc	0
BP	GO:0010970	transport along microtubule	1/430	37/11595	0.753513991221859	0.939420330263473	gene-LOC122886528	1	LOC122886528	1	gene-LOC122886528	0
BP	GO:0042326	negative regulation of phosphorylation	1/430	37/11595	0.753513991221859	0.939420330263473	gene-LOC122886518	1	LOC122886518	1	gene-LOC122886518	0
BP	GO:0046165	alcohol biosynthetic process	1/430	37/11595	0.753513991221859	0.939420330263473	gene-itpkcb	1	itpkcb	0	-	1
BP	GO:0051098	regulation of binding	1/430	37/11595	0.753513991221859	0.939420330263473	gene-LOC122877917	1	LOC122877917	1	gene-LOC122877917	0
BP	GO:0000278	mitotic cell cycle	6/430	200/11595	0.756837810688235	0.941471010094899	gene-LOC122877917/gene-tacc2/gene-LOC122887176/gene-id2a/gene-LOC122865952/gene-sapcd1	6	id2a/LOC122865952/LOC122877917/LOC122887176/sapcd1/tacc2	3	gene-LOC122877917/gene-sapcd1/gene-tacc2	3
BP	GO:0001932	regulation of protein phosphorylation	3/430	106/11595	0.758459734338148	0.941471010094899	gene-dok7b/gene-LOC122886518/gene-LOC122871413	3	dok7b/LOC122871413/LOC122886518	2	gene-LOC122871413/gene-LOC122886518	1
BP	GO:0034655	nucleobase-containing compound catabolic process	3/430	106/11595	0.758459734338148	0.941471010094899	gene-dut/gene-LOC122872164/gene-pde4ba	3	dut/LOC122872164/pde4ba	1	gene-LOC122872164	2
BP	GO:0034622	cellular protein-containing complex assembly	12/430	381/11595	0.759854686624773	0.941471010094899	gene-pstpip1b/gene-LOC122885147/gene-LOC122872091/gene-odad3/gene-snap91a/gene-fmn2a/gene-LOC122888042/gene-LOC122861414/gene-fmn1/gene-LOC122867164/gene-LOC122869242/gene-eps8a	12	eps8a/fmn1/fmn2a/LOC122861414/LOC122867164/LOC122869242/LOC122872091/LOC122885147/LOC122888042/odad3/pstpip1b/snap91a	8	gene-eps8a/gene-fmn1/gene-LOC122861414/gene-LOC122869242/gene-LOC122885147/gene-LOC122888042/gene-pstpip1b/gene-snap91a	4
BP	GO:0001505	regulation of neurotransmitter levels	1/430	38/11595	0.762684174971176	0.941471010094899	gene-LOC122871213	1	LOC122871213	0	-	1
BP	GO:0002443	leukocyte mediated immunity	1/430	38/11595	0.762684174971176	0.941471010094899	gene-swap70a	1	swap70a	0	-	1
BP	GO:0006165	nucleoside diphosphate phosphorylation	1/430	38/11595	0.762684174971176	0.941471010094899	gene-cmpk2	1	cmpk2	1	gene-cmpk2	0
BP	GO:0016125	sterol metabolic process	1/430	38/11595	0.762684174971176	0.941471010094899	gene-nfe2l1a	1	nfe2l1a	1	gene-nfe2l1a	0
BP	GO:0019751	polyol metabolic process	1/430	38/11595	0.762684174971176	0.941471010094899	gene-itpkcb	1	itpkcb	0	-	1
BP	GO:0046939	nucleotide phosphorylation	1/430	38/11595	0.762684174971176	0.941471010094899	gene-cmpk2	1	cmpk2	1	gene-cmpk2	0
BP	GO:0090257	regulation of muscle system process	1/430	38/11595	0.762684174971176	0.941471010094899	gene-LOC122877917	1	LOC122877917	1	gene-LOC122877917	0
BP	GO:0061061	muscle structure development	4/430	139/11595	0.763087029234813	0.941471010094899	gene-lrrc39/gene-myofl/gene-pdzph1/gene-mrtfbb	4	lrrc39/mrtfbb/myofl/pdzph1	2	gene-lrrc39/gene-pdzph1	2
BP	GO:0051347	positive regulation of transferase activity	2/430	74/11595	0.766026926731026	0.944280597397675	gene-dok7b/gene-LOC122877917	2	dok7b/LOC122877917	1	gene-LOC122877917	1
BP	GO:0007265	Ras protein signal transduction	3/430	108/11595	0.769530366731831	0.945172386371261	gene-rasgrp3/gene-arfgef3/gene-LOC122865952	3	arfgef3/LOC122865952/rasgrp3	2	gene-arfgef3/gene-rasgrp3	1
BP	GO:0007160	cell-matrix adhesion	1/430	39/11595	0.771513958198864	0.945172386371261	gene-parvb	1	parvb	1	gene-parvb	0
BP	GO:0042445	hormone metabolic process	1/430	39/11595	0.771513958198864	0.945172386371261	gene-dio1	1	dio1	0	-	1
BP	GO:0060042	retina morphogenesis in camera-type eye	1/430	39/11595	0.771513958198864	0.945172386371261	gene-rpgrb	1	rpgrb	0	-	1
BP	GO:1902652	secondary alcohol metabolic process	1/430	39/11595	0.771513958198864	0.945172386371261	gene-nfe2l1a	1	nfe2l1a	1	gene-nfe2l1a	0
BP	GO:0010557	positive regulation of macromolecule biosynthetic process	8/430	265/11595	0.771979498170012	0.945172386371261	gene-LOC122877917/gene-otx5/gene-LOC122880569/gene-rel/gene-LOC122886518/gene-mef2ca/gene-mrtfbb/gene-LOC122871423	8	LOC122871423/LOC122877917/LOC122880569/LOC122886518/mef2ca/mrtfbb/otx5/rel	7	gene-LOC122871423/gene-LOC122877917/gene-LOC122880569/gene-LOC122886518/gene-mef2ca/gene-otx5/gene-rel	1
BP	GO:0007411	axon guidance	2/430	75/11595	0.772487252440435	0.945172386371261	gene-myot/gene-LOC122888546	2	LOC122888546/myot	1	gene-myot	1
BP	GO:0044770	cell cycle phase transition	2/430	75/11595	0.772487252440435	0.945172386371261	gene-LOC122877917/gene-LOC122865952	2	LOC122865952/LOC122877917	1	gene-LOC122877917	1
BP	GO:0032940	secretion by cell	4/430	141/11595	0.772748333182158	0.945172386371261	gene-sytl4/gene-mroh1/gene-si:dkey-196h17.9/gene-LOC122871213	4	LOC122871213/mroh1/si:dkey-196h17.9/sytl4	2	gene-mroh1/gene-si:dkey-196h17.9	2
BP	GO:0051726	regulation of cell cycle	7/430	235/11595	0.773886555604685	0.945172386371261	gene-LOC122877917/gene-cables2b/gene-rgcc/gene-LOC122887176/gene-id2a/gene-LOC122865952/gene-LOC122868820	7	cables2b/id2a/LOC122865952/LOC122868820/LOC122877917/LOC122887176/rgcc	2	gene-cables2b/gene-LOC122877917	5
BP	GO:0009894	regulation of catabolic process	3/430	109/11595	0.774908869994921	0.945172386371261	gene-ctns/gene-LOC122886528/gene-tbc1d14	3	ctns/LOC122886528/tbc1d14	3	gene-ctns/gene-LOC122886528/gene-tbc1d14	0
BP	GO:0032268	regulation of cellular protein metabolic process	12/430	387/11595	0.777879533812938	0.945172386371261	gene-swap70a/gene-LOC122888945/gene-dok7b/gene-znf703/gene-LOC122877917/gene-LOC122881737/gene-snai2/gene-gfi1aa/gene-LOC122886518/gene-LOC122869242/gene-LOC122871413/gene-caprin2	12	caprin2/dok7b/gfi1aa/LOC122869242/LOC122871413/LOC122877917/LOC122881737/LOC122886518/LOC122888945/snai2/swap70a/znf703	7	gene-caprin2/gene-gfi1aa/gene-LOC122869242/gene-LOC122871413/gene-LOC122877917/gene-LOC122886518/gene-LOC122888945	5
BP	GO:0050790	regulation of catalytic activity	13/430	417/11595	0.778736288652891	0.945172386371261	gene-dok7b/gene-arhgap25/gene-sgsm1a/gene-LOC122877917/gene-zgc:92242/gene-LOC122881737/gene-rasgrp3/gene-asap1a/gene-arhgap24/gene-si:dkey-191m6.4/gene-rundc1/gene-tbc1d14/gene-tbc1d30	13	arhgap24/arhgap25/asap1a/dok7b/LOC122877917/LOC122881737/rasgrp3/rundc1/sgsm1a/si:dkey-191m6.4/tbc1d14/tbc1d30/zgc:92242	10	gene-arhgap25/gene-asap1a/gene-LOC122877917/gene-rasgrp3/gene-rundc1/gene-sgsm1a/gene-si:dkey-191m6.4/gene-tbc1d14/gene-tbc1d30/gene-zgc:92242	3
BP	GO:0097485	neuron projection guidance	2/430	76/11595	0.778791617302552	0.945172386371261	gene-myot/gene-LOC122888546	2	LOC122888546/myot	1	gene-myot	1
BP	GO:0000209	protein polyubiquitination	1/430	40/11595	0.780015948331652	0.945172386371261	gene-lnx2b	1	lnx2b	0	-	1
BP	GO:0006418	tRNA aminoacylation for protein translation	1/430	40/11595	0.780015948331652	0.945172386371261	gene-LOC122866314	1	LOC122866314	1	gene-LOC122866314	0
BP	GO:0006888	endoplasmic reticulum to Golgi vesicle-mediated transport	1/430	40/11595	0.780015948331652	0.945172386371261	gene-si:dkey-13n15.2	1	si:dkey-13n15.2	1	gene-si:dkey-13n15.2	0
BP	GO:0031331	positive regulation of cellular catabolic process	1/430	40/11595	0.780015948331652	0.945172386371261	gene-LOC122886528	1	LOC122886528	1	gene-LOC122886528	0
BP	GO:0034504	protein localization to nucleus	1/430	40/11595	0.780015948331652	0.945172386371261	gene-il12rb2l	1	il12rb2l	1	gene-il12rb2l	0
BP	GO:0035082	axoneme assembly	1/430	40/11595	0.780015948331652	0.945172386371261	gene-odad3	1	odad3	0	-	1
BP	GO:0140352	export from cell	4/430	143/11595	0.782097997013011	0.946890098337757	gene-sytl4/gene-mroh1/gene-si:dkey-196h17.9/gene-LOC122871213	4	LOC122871213/mroh1/si:dkey-196h17.9/sytl4	2	gene-mroh1/gene-si:dkey-196h17.9	2
BP	GO:0045935	positive regulation of nucleobase-containing compound metabolic process	8/430	269/11595	0.785841063282216	0.949440624547688	gene-LOC122877917/gene-otx5/gene-LOC122880569/gene-rel/gene-mef2ca/gene-mrtfbb/gene-cbx8a/gene-LOC122871423	8	cbx8a/LOC122871423/LOC122877917/LOC122880569/mef2ca/mrtfbb/otx5/rel	6	gene-LOC122871423/gene-LOC122877917/gene-LOC122880569/gene-mef2ca/gene-otx5/gene-rel	2
BP	GO:0040007	growth	5/430	176/11595	0.78671743271947	0.949440624547688	gene-ccn1/gene-omgb/gene-osgin2/gene-pard6gb/gene-tnca	5	ccn1/omgb/osgin2/pard6gb/tnca	2	gene-omgb/gene-osgin2	3
BP	GO:0002697	regulation of immune effector process	1/430	41/11595	0.788202286905203	0.949440624547688	gene-LOC122878212	1	LOC122878212	1	gene-LOC122878212	0
BP	GO:0030902	hindbrain development	1/430	41/11595	0.788202286905203	0.949440624547688	gene-znf703	1	znf703	0	-	1
BP	GO:0031346	positive regulation of cell projection organization	1/430	41/11595	0.788202286905203	0.949440624547688	gene-ndnf	1	ndnf	0	-	1
BP	GO:0048736	appendage development	1/430	41/11595	0.788202286905203	0.949440624547688	gene-itga3b	1	itga3b	1	gene-itga3b	0
BP	GO:0044092	negative regulation of molecular function	4/430	145/11595	0.79114045111135	0.951695176264184	gene-LOC122877917/gene-zgc:92242/gene-gem/gene-LOC122869242	4	gem/LOC122869242/LOC122877917/zgc:92242	4	gene-gem/gene-LOC122869242/gene-LOC122877917/gene-zgc:92242	0
BP	GO:0006259	DNA metabolic process	13/430	423/11595	0.79519413813164	0.951695176264184	gene-swap70a/gene-eya2/gene-LOC122877917/gene-LOC122882812/gene-pgbd5/gene-LOC122865519/gene-LOC122868980/gene-cbx8a/gene-LOC122869923/gene-LOC122871610/gene-LOC122871826/gene-nhej1/Novel.18	13	cbx8a/eya2/LOC122865519/LOC122868980/LOC122869923/LOC122871610/LOC122871826/LOC122877917/LOC122882812/nhej1/pgbd5/swap70a/Novel.18	8	gene-LOC122865519/gene-LOC122868980/gene-LOC122869923/gene-LOC122871610/gene-LOC122877917/gene-LOC122882812/gene-pgbd5/Novel.18	5
BP	GO:0045893	positive regulation of transcription, DNA-templated	7/430	241/11595	0.795462184634273	0.951695176264184	gene-LOC122877917/gene-otx5/gene-LOC122880569/gene-rel/gene-mef2ca/gene-mrtfbb/gene-LOC122871423	7	LOC122871423/LOC122877917/LOC122880569/mef2ca/mrtfbb/otx5/rel	6	gene-LOC122871423/gene-LOC122877917/gene-LOC122880569/gene-mef2ca/gene-otx5/gene-rel	1
BP	GO:1902680	positive regulation of RNA biosynthetic process	7/430	241/11595	0.795462184634273	0.951695176264184	gene-LOC122877917/gene-otx5/gene-LOC122880569/gene-rel/gene-mef2ca/gene-mrtfbb/gene-LOC122871423	7	LOC122871423/LOC122877917/LOC122880569/mef2ca/mrtfbb/otx5/rel	6	gene-LOC122871423/gene-LOC122877917/gene-LOC122880569/gene-mef2ca/gene-otx5/gene-rel	1
BP	GO:1903508	positive regulation of nucleic acid-templated transcription	7/430	241/11595	0.795462184634273	0.951695176264184	gene-LOC122877917/gene-otx5/gene-LOC122880569/gene-rel/gene-mef2ca/gene-mrtfbb/gene-LOC122871423	7	LOC122871423/LOC122877917/LOC122880569/mef2ca/mrtfbb/otx5/rel	6	gene-LOC122871423/gene-LOC122877917/gene-LOC122880569/gene-mef2ca/gene-otx5/gene-rel	1
BP	GO:0006956	complement activation	1/430	42/11595	0.79608466674169	0.951695176264184	gene-LOC122868841	1	LOC122868841	1	gene-LOC122868841	0
BP	GO:0030218	erythrocyte differentiation	1/430	42/11595	0.79608466674169	0.951695176264184	gene-flvcr1	1	flvcr1	1	gene-flvcr1	0
BP	GO:0034101	erythrocyte homeostasis	1/430	42/11595	0.79608466674169	0.951695176264184	gene-flvcr1	1	flvcr1	1	gene-flvcr1	0
BP	GO:0045165	cell fate commitment	1/430	42/11595	0.79608466674169	0.951695176264184	gene-prdm1b	1	prdm1b	1	gene-prdm1b	0
BP	GO:0007517	muscle organ development	2/430	79/11595	0.796795541043649	0.951746559922212	gene-lrrc39/gene-mrtfbb	2	lrrc39/mrtfbb	1	gene-lrrc39	1
BP	GO:0006575	cellular modified amino acid metabolic process	2/430	80/11595	0.802502728590557	0.954363288838334	gene-LOC122874604/gene-aldh1l2	2	aldh1l2/LOC122874604	1	gene-aldh1l2	1
BP	GO:0006665	sphingolipid metabolic process	1/430	43/11595	0.80367434849544	0.954363288838334	gene-smpdl3b	1	smpdl3b	0	-	1
BP	GO:0009132	nucleoside diphosphate metabolic process	1/430	43/11595	0.80367434849544	0.954363288838334	gene-cmpk2	1	cmpk2	1	gene-cmpk2	0
BP	GO:0009896	positive regulation of catabolic process	1/430	43/11595	0.80367434849544	0.954363288838334	gene-LOC122886528	1	LOC122886528	1	gene-LOC122886528	0
BP	GO:0014031	mesenchymal cell development	1/430	43/11595	0.80367434849544	0.954363288838334	gene-snai2	1	snai2	0	-	1
BP	GO:0014032	neural crest cell development	1/430	43/11595	0.80367434849544	0.954363288838334	gene-snai2	1	snai2	0	-	1
BP	GO:0048864	stem cell development	1/430	43/11595	0.80367434849544	0.954363288838334	gene-snai2	1	snai2	0	-	1
BP	GO:0010564	regulation of cell cycle process	3/430	115/11595	0.805052509498221	0.955203851819288	gene-LOC122877917/gene-LOC122865952/gene-LOC122868820	3	LOC122865952/LOC122868820/LOC122877917	1	gene-LOC122877917	2
BP	GO:0072657	protein localization to membrane	2/430	81/11595	0.808067343887726	0.956361461329503	gene-LOC122878347/gene-LOC122863926	2	LOC122863926/LOC122878347	2	gene-LOC122863926/gene-LOC122878347	0
BP	GO:0032787	monocarboxylic acid metabolic process	5/430	182/11595	0.810325781684977	0.956361461329503	gene-hal/gene-elovl5/gene-acaca/gene-lpin1b/gene-LOC122871599	5	acaca/elovl5/hal/LOC122871599/lpin1b	5	gene-acaca/gene-elovl5/gene-hal/gene-LOC122871599/gene-lpin1b	0
BP	GO:0000075	cell cycle checkpoint	1/430	44/11595	0.810982176589879	0.956361461329503	gene-id2a	1	id2a	0	-	1
BP	GO:0009116	nucleoside metabolic process	1/430	44/11595	0.810982176589879	0.956361461329503	gene-macrod1	1	macrod1	1	gene-macrod1	0
BP	GO:0016458	gene silencing	1/430	44/11595	0.810982176589879	0.956361461329503	gene-cbx8a	1	cbx8a	0	-	1
BP	GO:0043543	protein acylation	1/430	44/11595	0.810982176589879	0.956361461329503	gene-snai2	1	snai2	0	-	1
BP	GO:0006974	cellular response to DNA damage stimulus	9/430	308/11595	0.812028066919034	0.956361461329503	gene-eya2/gene-macrod1/gene-LOC122881737/gene-snai2/gene-id2a/gene-LOC122868820/gene-cbx8a/gene-LOC122871826/gene-nhej1	9	cbx8a/eya2/id2a/LOC122868820/LOC122871826/LOC122881737/macrod1/nhej1/snai2	1	gene-macrod1	8
BP	GO:0048880	sensory system development	5/430	183/11595	0.814051309949384	0.956361461329503	gene-znf703/gene-LOC122877917/gene-cryba2b/gene-id2a/gene-rpgrb	5	cryba2b/id2a/LOC122877917/rpgrb/znf703	2	gene-cryba2b/gene-LOC122877917	3
BP	GO:0046649	lymphocyte activation	3/430	117/11595	0.814317672667445	0.956361461329503	gene-swap70a/gene-wdfy4/gene-LOC122869242	3	LOC122869242/swap70a/wdfy4	2	gene-LOC122869242/gene-wdfy4	1
BP	GO:0051254	positive regulation of RNA metabolic process	7/430	247/11595	0.815448923412336	0.956361461329503	gene-LOC122877917/gene-otx5/gene-LOC122880569/gene-rel/gene-mef2ca/gene-mrtfbb/gene-LOC122871423	7	LOC122871423/LOC122877917/LOC122880569/mef2ca/mrtfbb/otx5/rel	6	gene-LOC122871423/gene-LOC122877917/gene-LOC122880569/gene-mef2ca/gene-otx5/gene-rel	1
BP	GO:0002262	myeloid cell homeostasis	1/430	45/11595	0.818018594568093	0.956361461329503	gene-flvcr1	1	flvcr1	1	gene-flvcr1	0
BP	GO:0007626	locomotory behavior	1/430	45/11595	0.818018594568093	0.956361461329503	gene-camk1gb	1	camk1gb	1	gene-camk1gb	0
BP	GO:0043038	amino acid activation	1/430	45/11595	0.818018594568093	0.956361461329503	gene-LOC122866314	1	LOC122866314	1	gene-LOC122866314	0
BP	GO:0043039	tRNA aminoacylation	1/430	45/11595	0.818018594568093	0.956361461329503	gene-LOC122866314	1	LOC122866314	1	gene-LOC122866314	0
BP	GO:0045860	positive regulation of protein kinase activity	1/430	45/11595	0.818018594568093	0.956361461329503	gene-dok7b	1	dok7b	0	-	1
BP	GO:1901657	glycosyl compound metabolic process	1/430	45/11595	0.818018594568093	0.956361461329503	gene-macrod1	1	macrod1	1	gene-macrod1	0
BP	GO:0009416	response to light stimulus	2/430	83/11595	0.818779637068065	0.956361461329503	gene-LOC122887291/gene-parapinopsina	2	LOC122887291/parapinopsina	2	gene-LOC122887291/gene-parapinopsina	0
BP	GO:0051056	regulation of small GTPase mediated signal transduction	2/430	83/11595	0.818779637068065	0.956361461329503	gene-arfgef3/gene-LOC122865952	2	arfgef3/LOC122865952	1	gene-arfgef3	1
BP	GO:0060485	mesenchyme development	2/430	83/11595	0.818779637068065	0.956361461329503	gene-snai1a/gene-snai2	2	snai1a/snai2	0	-	2
BP	GO:0051246	regulation of protein metabolic process	12/430	403/11595	0.821248978376516	0.956400390665897	gene-swap70a/gene-LOC122888945/gene-dok7b/gene-znf703/gene-LOC122877917/gene-LOC122881737/gene-snai2/gene-gfi1aa/gene-LOC122886518/gene-LOC122869242/gene-LOC122871413/gene-caprin2	12	caprin2/dok7b/gfi1aa/LOC122869242/LOC122871413/LOC122877917/LOC122881737/LOC122886518/LOC122888945/snai2/swap70a/znf703	7	gene-caprin2/gene-gfi1aa/gene-LOC122869242/gene-LOC122871413/gene-LOC122877917/gene-LOC122886518/gene-LOC122888945	5
BP	GO:0015698	inorganic anion transport	2/430	84/11595	0.82393269267264	0.956400390665897	gene-slc12a5a/gene-slc34a1b	2	slc12a5a/slc34a1b	2	gene-slc12a5a/gene-slc34a1b	0
BP	GO:0051090	regulation of DNA-binding transcription factor activity	2/430	84/11595	0.82393269267264	0.956400390665897	gene-LOC122877917/gene-LOC122869242	2	LOC122869242/LOC122877917	2	gene-LOC122869242/gene-LOC122877917	0
BP	GO:0060041	retina development in camera-type eye	2/430	84/11595	0.82393269267264	0.956400390665897	gene-id2a/gene-rpgrb	2	id2a/rpgrb	0	-	2
BP	GO:0031929	TOR signaling	1/430	46/11595	0.824793659878545	0.956400390665897	gene-LOC122871413	1	LOC122871413	1	gene-LOC122871413	0
BP	GO:0055002	striated muscle cell development	1/430	46/11595	0.824793659878545	0.956400390665897	gene-lrrc39	1	lrrc39	1	gene-lrrc39	0
BP	GO:0007423	sensory organ development	6/430	219/11595	0.827362346929332	0.956400390665897	gene-znf703/gene-LOC122877917/gene-cryba2b/gene-id2a/gene-grhl2b/gene-rpgrb	6	cryba2b/grhl2b/id2a/LOC122877917/rpgrb/znf703	3	gene-cryba2b/gene-grhl2b/gene-LOC122877917	3
BP	GO:0016311	dephosphorylation	2/430	85/11595	0.828953924833289	0.956400390665897	gene-swap70a/gene-zgc:92242	2	swap70a/zgc:92242	1	gene-zgc:92242	1
BP	GO:0014033	neural crest cell differentiation	1/430	47/11595	0.83131705811668	0.956400390665897	gene-snai2	1	snai2	0	-	1
BP	GO:0032607	interferon-alpha production	1/430	47/11595	0.83131705811668	0.956400390665897	gene-LOC122869242	1	LOC122869242	1	gene-LOC122869242	0
BP	GO:0032647	regulation of interferon-alpha production	1/430	47/11595	0.83131705811668	0.956400390665897	gene-LOC122869242	1	LOC122869242	1	gene-LOC122869242	0
BP	GO:0032687	negative regulation of interferon-alpha production	1/430	47/11595	0.83131705811668	0.956400390665897	gene-LOC122869242	1	LOC122869242	1	gene-LOC122869242	0
BP	GO:0032695	negative regulation of interleukin-12 production	1/430	47/11595	0.83131705811668	0.956400390665897	gene-LOC122869242	1	LOC122869242	1	gene-LOC122869242	0
BP	GO:1900016	negative regulation of cytokine production involved in inflammatory response	1/430	47/11595	0.83131705811668	0.956400390665897	gene-LOC122869242	1	LOC122869242	1	gene-LOC122869242	0
BP	GO:1900225	regulation of NLRP3 inflammasome complex assembly	1/430	47/11595	0.83131705811668	0.956400390665897	gene-LOC122869242	1	LOC122869242	1	gene-LOC122869242	0
BP	GO:1900226	negative regulation of NLRP3 inflammasome complex assembly	1/430	47/11595	0.83131705811668	0.956400390665897	gene-LOC122869242	1	LOC122869242	1	gene-LOC122869242	0
BP	GO:0007017	microtubule-based process	12/430	408/11595	0.833425309014897	0.956400390665897	gene-map1aa/gene-odad3/gene-kif21a/gene-dnah12/gene-tacc2/gene-LOC122886528/gene-kif1ab/gene-kif26bb/gene-LOC122863271/gene-LOC122870458/gene-sapcd1/gene-rpgrb	12	dnah12/kif1ab/kif21a/kif26bb/LOC122863271/LOC122870458/LOC122886528/map1aa/odad3/rpgrb/sapcd1/tacc2	10	gene-dnah12/gene-kif1ab/gene-kif21a/gene-kif26bb/gene-LOC122863271/gene-LOC122870458/gene-LOC122886528/gene-map1aa/gene-sapcd1/gene-tacc2	2
BP	GO:0046903	secretion	4/430	156/11595	0.835612958512407	0.956400390665897	gene-sytl4/gene-mroh1/gene-si:dkey-196h17.9/gene-LOC122871213	4	LOC122871213/mroh1/si:dkey-196h17.9/sytl4	2	gene-mroh1/gene-si:dkey-196h17.9	2
BP	GO:0006959	humoral immune response	1/430	48/11595	0.837598116742401	0.956400390665897	gene-LOC122868841	1	LOC122868841	1	gene-LOC122868841	0
BP	GO:0021953	central nervous system neuron differentiation	1/430	48/11595	0.837598116742401	0.956400390665897	gene-ndnf	1	ndnf	0	-	1
BP	GO:0031016	pancreas development	1/430	48/11595	0.837598116742401	0.956400390665897	gene-lnx2b	1	lnx2b	0	-	1
BP	GO:0032688	negative regulation of interferon-beta production	1/430	48/11595	0.837598116742401	0.956400390665897	gene-LOC122869242	1	LOC122869242	1	gene-LOC122869242	0
BP	GO:0007249	I-kappaB kinase/NF-kappaB signaling	2/430	87/11595	0.838611552811923	0.956400390665897	gene-rel/gene-LOC122869242	2	LOC122869242/rel	2	gene-LOC122869242/gene-rel	0
BP	GO:0048193	Golgi vesicle transport	2/430	87/11595	0.838611552811923	0.956400390665897	gene-si:dkey-13n15.2/gene-tbc1d14	2	si:dkey-13n15.2/tbc1d14	2	gene-si:dkey-13n15.2/gene-tbc1d14	0
BP	GO:0048562	embryonic organ morphogenesis	3/430	123/11595	0.839902639765936	0.956400390665897	gene-skib/gene-znf703/gene-pthlha	3	pthlha/skib/znf703	0	-	3
BP	GO:0002532	production of molecular mediator involved in inflammatory response	1/430	49/11595	0.843645818292654	0.956400390665897	gene-LOC122869242	1	LOC122869242	1	gene-LOC122869242	0
BP	GO:0002534	cytokine production involved in inflammatory response	1/430	49/11595	0.843645818292654	0.956400390665897	gene-LOC122869242	1	LOC122869242	1	gene-LOC122869242	0
BP	GO:0006836	neurotransmitter transport	1/430	49/11595	0.843645818292654	0.956400390665897	gene-LOC122871213	1	LOC122871213	0	-	1
BP	GO:0031032	actomyosin structure organization	1/430	49/11595	0.843645818292654	0.956400390665897	gene-lrrc39	1	lrrc39	1	gene-lrrc39	0
BP	GO:0032480	negative regulation of type I interferon production	1/430	49/11595	0.843645818292654	0.956400390665897	gene-LOC122869242	1	LOC122869242	1	gene-LOC122869242	0
BP	GO:0032615	interleukin-12 production	1/430	49/11595	0.843645818292654	0.956400390665897	gene-LOC122869242	1	LOC122869242	1	gene-LOC122869242	0
BP	GO:0032655	regulation of interleukin-12 production	1/430	49/11595	0.843645818292654	0.956400390665897	gene-LOC122869242	1	LOC122869242	1	gene-LOC122869242	0
BP	GO:0033674	positive regulation of kinase activity	1/430	49/11595	0.843645818292654	0.956400390665897	gene-dok7b	1	dok7b	0	-	1
BP	GO:0044546	NLRP3 inflammasome complex assembly	1/430	49/11595	0.843645818292654	0.956400390665897	gene-LOC122869242	1	LOC122869242	1	gene-LOC122869242	0
BP	GO:0045824	negative regulation of innate immune response	1/430	49/11595	0.843645818292654	0.956400390665897	gene-LOC122869242	1	LOC122869242	1	gene-LOC122869242	0
BP	GO:0048793	pronephros development	1/430	49/11595	0.843645818292654	0.956400390665897	gene-pard6gb	1	pard6gb	0	-	1
BP	GO:1900015	regulation of cytokine production involved in inflammatory response	1/430	49/11595	0.843645818292654	0.956400390665897	gene-LOC122869242	1	LOC122869242	1	gene-LOC122869242	0
BP	GO:0032608	interferon-beta production	1/430	50/11595	0.849468813107669	0.959186258857708	gene-LOC122869242	1	LOC122869242	1	gene-LOC122869242	0
BP	GO:0032648	regulation of interferon-beta production	1/430	50/11595	0.849468813107669	0.959186258857708	gene-LOC122869242	1	LOC122869242	1	gene-LOC122869242	0
BP	GO:0032720	negative regulation of tumor necrosis factor production	1/430	50/11595	0.849468813107669	0.959186258857708	gene-LOC122869242	1	LOC122869242	1	gene-LOC122869242	0
BP	GO:1903556	negative regulation of tumor necrosis factor superfamily cytokine production	1/430	50/11595	0.849468813107669	0.959186258857708	gene-LOC122869242	1	LOC122869242	1	gene-LOC122869242	0
BP	GO:1990778	protein localization to cell periphery	1/430	50/11595	0.849468813107669	0.959186258857708	gene-sapcd1	1	sapcd1	1	gene-sapcd1	0
BP	GO:0006816	calcium ion transport	1/430	51/11595	0.855075431588717	0.961746860574483	gene-gem	1	gem	1	gene-gem	0
BP	GO:0006839	mitochondrial transport	1/430	51/11595	0.855075431588717	0.961746860574483	gene-LOC122888793	1	LOC122888793	1	gene-LOC122888793	0
BP	GO:0016482	cytosolic transport	1/430	51/11595	0.855075431588717	0.961746860574483	gene-tbc1d14	1	tbc1d14	1	gene-tbc1d14	0
BP	GO:0030705	cytoskeleton-dependent intracellular transport	1/430	51/11595	0.855075431588717	0.961746860574483	gene-LOC122886528	1	LOC122886528	1	gene-LOC122886528	0
BP	GO:0006066	alcohol metabolic process	2/430	91/11595	0.856460888469487	0.961746860574483	gene-itpkcb/gene-nfe2l1a	2	itpkcb/nfe2l1a	1	gene-nfe2l1a	1
BP	GO:0010256	endomembrane system organization	2/430	91/11595	0.856460888469487	0.961746860574483	gene-mtss1la/gene-ndrg1a	2	mtss1la/ndrg1a	1	gene-ndrg1a	1
BP	GO:0032880	regulation of protein localization	2/430	91/11595	0.856460888469487	0.961746860574483	gene-swap70a/gene-sapcd1	2	sapcd1/swap70a	1	gene-sapcd1	1
BP	GO:0015849	organic acid transport	1/430	52/11595	0.860473696004591	0.962460766724131	gene-LOC122871427	1	LOC122871427	1	gene-LOC122871427	0
BP	GO:0032691	negative regulation of interleukin-1 beta production	1/430	52/11595	0.860473696004591	0.962460766724131	gene-LOC122869242	1	LOC122869242	1	gene-LOC122869242	0
BP	GO:0032692	negative regulation of interleukin-1 production	1/430	52/11595	0.860473696004591	0.962460766724131	gene-LOC122869242	1	LOC122869242	1	gene-LOC122869242	0
BP	GO:0045017	glycerolipid biosynthetic process	1/430	52/11595	0.860473696004591	0.962460766724131	gene-lpin1b	1	lpin1b	1	gene-lpin1b	0
BP	GO:1903131	mononuclear cell differentiation	1/430	52/11595	0.860473696004591	0.962460766724131	gene-zbtb46	1	zbtb46	0	-	1
BP	GO:0060271	cilium assembly	4/430	164/11595	0.8627544966178	0.96394891522725	gene-odad3/gene-znf703/gene-vdac3/gene-rpgrb	4	odad3/rpgrb/vdac3/znf703	1	gene-vdac3	3
BP	GO:0015980	energy derivation by oxidation of organic compounds	2/430	93/11595	0.864693746193635	0.96394891522725	gene-LOC122882574/gene-pygl	2	LOC122882574/pygl	2	gene-LOC122882574/gene-pygl	0
BP	GO:0007051	spindle organization	1/430	53/11595	0.865671331863382	0.96394891522725	gene-tacc2	1	tacc2	1	gene-tacc2	0
BP	GO:0048701	embryonic cranial skeleton morphogenesis	1/430	53/11595	0.865671331863382	0.96394891522725	gene-pthlha	1	pthlha	0	-	1
BP	GO:0048704	embryonic skeletal system morphogenesis	1/430	53/11595	0.865671331863382	0.96394891522725	gene-pthlha	1	pthlha	0	-	1
BP	GO:0007420	brain development	4/430	165/11595	0.865862885256758	0.96394891522725	gene-znf703/gene-ndnf/gene-grhl2b/gene-mrtfbb	4	grhl2b/mrtfbb/ndnf/znf703	1	gene-grhl2b	3
BP	GO:0032102	negative regulation of response to external stimulus	2/430	94/11595	0.868646018657932	0.965942873203269	gene-LOC122869242/gene-tafa5a	2	LOC122869242/tafa5a	1	gene-LOC122869242	1
BP	GO:0042325	regulation of phosphorylation	3/430	131/11595	0.869243264428114	0.965942873203269	gene-dok7b/gene-LOC122886518/gene-LOC122871413	3	dok7b/LOC122871413/LOC122886518	2	gene-LOC122871413/gene-LOC122886518	1
BP	GO:0002832	negative regulation of response to biotic stimulus	1/430	54/11595	0.870675778865526	0.965942873203269	gene-LOC122869242	1	LOC122869242	1	gene-LOC122869242	0
BP	GO:0048147	negative regulation of fibroblast proliferation	1/430	54/11595	0.870675778865526	0.965942873203269	gene-LOC122869242	1	LOC122869242	1	gene-LOC122869242	0
BP	GO:0006357	regulation of transcription by RNA polymerase II	14/430	488/11595	0.87237914448444	0.965942873203269	gene-lef1/gene-ascl1b/gene-LOC122877917/gene-LOC122880569/gene-zbtb46/gene-snai2/gene-lpin1b/gene-atf3/gene-jazf1a/gene-mef2ca/gene-LOC122865952/gene-mrtfbb/gene-cbx8a/gene-LOC122871423	14	ascl1b/atf3/cbx8a/jazf1a/lef1/LOC122865952/LOC122871423/LOC122877917/LOC122880569/lpin1b/mef2ca/mrtfbb/snai2/zbtb46	8	gene-ascl1b/gene-atf3/gene-lef1/gene-LOC122871423/gene-LOC122877917/gene-LOC122880569/gene-lpin1b/gene-mef2ca	6
BP	GO:1902532	negative regulation of intracellular signal transduction	3/430	132/11595	0.872556717018931	0.965942873203269	gene-LOC122877917/gene-snai2/gene-LOC122869242	3	LOC122869242/LOC122877917/snai2	2	gene-LOC122869242/gene-LOC122877917	1
BP	GO:0032611	interleukin-1 beta production	1/430	55/11595	0.875494201453502	0.965942873203269	gene-LOC122869242	1	LOC122869242	1	gene-LOC122869242	0
BP	GO:0032651	regulation of interleukin-1 beta production	1/430	55/11595	0.875494201453502	0.965942873203269	gene-LOC122869242	1	LOC122869242	1	gene-LOC122869242	0
BP	GO:0032715	negative regulation of interleukin-6 production	1/430	55/11595	0.875494201453502	0.965942873203269	gene-LOC122869242	1	LOC122869242	1	gene-LOC122869242	0
BP	GO:1901137	carbohydrate derivative biosynthetic process	9/430	335/11595	0.879107720615045	0.965942873203269	gene-dut/gene-ampd3a/gene-st3gal4/gene-elovl5/gene-acaca/gene-adss1/gene-cmpk2/gene-LOC122863823/gene-LOC122869764	9	acaca/adss1/ampd3a/cmpk2/dut/elovl5/LOC122863823/LOC122869764/st3gal4	5	gene-acaca/gene-adss1/gene-cmpk2/gene-elovl5/gene-LOC122869764	4
BP	GO:0032479	regulation of type I interferon production	1/430	56/11595	0.880133498972999	0.965942873203269	gene-LOC122869242	1	LOC122869242	1	gene-LOC122869242	0
BP	GO:0032606	type I interferon production	1/430	56/11595	0.880133498972999	0.965942873203269	gene-LOC122869242	1	LOC122869242	1	gene-LOC122869242	0
BP	GO:0045088	regulation of innate immune response	1/430	56/11595	0.880133498972999	0.965942873203269	gene-LOC122869242	1	LOC122869242	1	gene-LOC122869242	0
BP	GO:0048144	fibroblast proliferation	1/430	56/11595	0.880133498972999	0.965942873203269	gene-LOC122869242	1	LOC122869242	1	gene-LOC122869242	0
BP	GO:0048145	regulation of fibroblast proliferation	1/430	56/11595	0.880133498972999	0.965942873203269	gene-LOC122869242	1	LOC122869242	1	gene-LOC122869242	0
BP	GO:0055001	muscle cell development	1/430	56/11595	0.880133498972999	0.965942873203269	gene-lrrc39	1	lrrc39	1	gene-lrrc39	0
BP	GO:1901223	negative regulation of NIK/NF-kappaB signaling	1/430	56/11595	0.880133498972999	0.965942873203269	gene-LOC122869242	1	LOC122869242	1	gene-LOC122869242	0
BP	GO:1903827	regulation of cellular protein localization	1/430	56/11595	0.880133498972999	0.965942873203269	gene-sapcd1	1	sapcd1	1	gene-sapcd1	0
BP	GO:0001578	microtubule bundle formation	1/430	57/11595	0.884600315459835	0.965942873203269	gene-odad3	1	odad3	0	-	1
BP	GO:0006936	muscle contraction	1/430	57/11595	0.884600315459835	0.965942873203269	gene-LOC122863516	1	LOC122863516	0	-	1
BP	GO:0023061	signal release	1/430	57/11595	0.884600315459835	0.965942873203269	gene-LOC122871213	1	LOC122871213	0	-	1
BP	GO:0032640	tumor necrosis factor production	1/430	57/11595	0.884600315459835	0.965942873203269	gene-LOC122869242	1	LOC122869242	1	gene-LOC122869242	0
BP	GO:0032680	regulation of tumor necrosis factor production	1/430	57/11595	0.884600315459835	0.965942873203269	gene-LOC122869242	1	LOC122869242	1	gene-LOC122869242	0
BP	GO:0071706	tumor necrosis factor superfamily cytokine production	1/430	57/11595	0.884600315459835	0.965942873203269	gene-LOC122869242	1	LOC122869242	1	gene-LOC122869242	0
BP	GO:1903555	regulation of tumor necrosis factor superfamily cytokine production	1/430	57/11595	0.884600315459835	0.965942873203269	gene-LOC122869242	1	LOC122869242	1	gene-LOC122869242	0
BP	GO:0042110	T cell activation	2/430	99/11595	0.88686273064385	0.967671815595318	gene-wdfy4/gene-LOC122869242	2	LOC122869242/wdfy4	2	gene-LOC122869242/gene-wdfy4	0
BP	GO:0032612	interleukin-1 production	1/430	59/11595	0.893041861140699	0.970697675152933	gene-LOC122869242	1	LOC122869242	1	gene-LOC122869242	0
BP	GO:0032652	regulation of interleukin-1 production	1/430	59/11595	0.893041861140699	0.970697675152933	gene-LOC122869242	1	LOC122869242	1	gene-LOC122869242	0
BP	GO:0043124	negative regulation of I-kappaB kinase/NF-kappaB signaling	1/430	59/11595	0.893041861140699	0.970697675152933	gene-LOC122869242	1	LOC122869242	1	gene-LOC122869242	0
BP	GO:0043414	macromolecule methylation	1/430	59/11595	0.893041861140699	0.970697675152933	gene-gfi1aa	1	gfi1aa	1	gene-gfi1aa	0
BP	GO:0048839	inner ear development	1/430	59/11595	0.893041861140699	0.970697675152933	gene-grhl2b	1	grhl2b	1	gene-grhl2b	0
BP	GO:0048872	homeostasis of number of cells	1/430	60/11595	0.897028684971273	0.972987121823895	gene-flvcr1	1	flvcr1	1	gene-flvcr1	0
BP	GO:0031347	regulation of defense response	2/430	103/11595	0.899721874296331	0.972987121823895	gene-LOC122878212/gene-LOC122869242	2	LOC122869242/LOC122878212	2	gene-LOC122869242/gene-LOC122878212	0
BP	GO:0007596	blood coagulation	1/430	61/11595	0.900867234209448	0.972987121823895	gene-p2ry8	1	p2ry8	1	gene-p2ry8	0
BP	GO:0043583	ear development	1/430	61/11595	0.900867234209448	0.972987121823895	gene-grhl2b	1	grhl2b	1	gene-grhl2b	0
BP	GO:0060322	head development	4/430	178/11595	0.901075257381131	0.972987121823895	gene-znf703/gene-ndnf/gene-grhl2b/gene-mrtfbb	4	grhl2b/mrtfbb/ndnf/znf703	1	gene-grhl2b	3
BP	GO:0007610	behavior	2/430	104/11595	0.902717119625195	0.972987121823895	gene-apln/gene-camk1gb	2	apln/camk1gb	2	gene-apln/gene-camk1gb	0
BP	GO:0009967	positive regulation of signal transduction	4/430	179/11595	0.903413134805498	0.972987121823895	gene-tmem198a/gene-bambia/gene-LOC122871413/gene-caprin2	4	bambia/caprin2/LOC122871413/tmem198a	3	gene-caprin2/gene-LOC122871413/gene-tmem198a	1
BP	GO:0044782	cilium organization	4/430	179/11595	0.903413134805498	0.972987121823895	gene-odad3/gene-znf703/gene-vdac3/gene-rpgrb	4	odad3/rpgrb/vdac3/znf703	1	gene-vdac3	3
BP	GO:0007599	hemostasis	1/430	62/11595	0.904563010981595	0.972987121823895	gene-p2ry8	1	p2ry8	1	gene-p2ry8	0
BP	GO:0010817	regulation of hormone levels	1/430	62/11595	0.904563010981595	0.972987121823895	gene-dio1	1	dio1	0	-	1
BP	GO:0017038	protein import	1/430	62/11595	0.904563010981595	0.972987121823895	gene-il12rb2l	1	il12rb2l	1	gene-il12rb2l	0
BP	GO:0006310	DNA recombination	2/430	105/11595	0.905628799347201	0.972987121823895	gene-swap70a/gene-pgbd5	2	pgbd5/swap70a	1	gene-pgbd5	1
BP	GO:0030001	metal ion transport	1/430	63/11595	0.908121313702302	0.972987121823895	gene-gem	1	gem	1	gene-gem	0
BP	GO:0032635	interleukin-6 production	1/430	63/11595	0.908121313702302	0.972987121823895	gene-LOC122869242	1	LOC122869242	1	gene-LOC122869242	0
BP	GO:0032675	regulation of interleukin-6 production	1/430	63/11595	0.908121313702302	0.972987121823895	gene-LOC122869242	1	LOC122869242	1	gene-LOC122869242	0
BP	GO:0045333	cellular respiration	1/430	63/11595	0.908121313702302	0.972987121823895	gene-LOC122882574	1	LOC122882574	1	gene-LOC122882574	0
BP	GO:0048706	embryonic skeletal system development	1/430	63/11595	0.908121313702302	0.972987121823895	gene-pthlha	1	pthlha	0	-	1
BP	GO:0050728	negative regulation of inflammatory response	1/430	63/11595	0.908121313702302	0.972987121823895	gene-LOC122869242	1	LOC122869242	1	gene-LOC122869242	0
BP	GO:1904888	cranial skeletal system development	1/430	63/11595	0.908121313702302	0.972987121823895	gene-pthlha	1	pthlha	0	-	1
BP	GO:0050777	negative regulation of immune response	1/430	64/11595	0.911547244599632	0.975191308974831	gene-LOC122869242	1	LOC122869242	1	gene-LOC122869242	0
BP	GO:0050817	coagulation	1/430	64/11595	0.911547244599632	0.975191308974831	gene-p2ry8	1	p2ry8	1	gene-p2ry8	0
BP	GO:0034220	ion transmembrane transport	7/430	287/11595	0.912395913666509	0.9753669744747	gene-LOC122870126/gene-slc12a5a/gene-gem/gene-kcnj15/gene-kcnj1b/gene-kcnj2a/gene-LOC122871427	7	gem/kcnj15/kcnj1b/kcnj2a/LOC122870126/LOC122871427/slc12a5a	5	gene-gem/gene-kcnj2a/gene-LOC122870126/gene-LOC122871427/gene-slc12a5a	2
BP	GO:0050878	regulation of body fluid levels	1/430	65/11595	0.914845716963014	0.977252733637402	gene-p2ry8	1	p2ry8	1	gene-p2ry8	0
BP	GO:0051129	negative regulation of cellular component organization	4/430	185/11595	0.916441860955302	0.978224458323075	gene-swap70a/gene-LOC122885147/gene-LOC122869242/gene-eps8a	4	eps8a/LOC122869242/LOC122885147/swap70a	3	gene-eps8a/gene-LOC122869242/gene-LOC122885147	1
BP	GO:0044262	cellular carbohydrate metabolic process	1/430	66/11595	0.918021462123977	0.979177083478044	gene-pygl	1	pygl	1	gene-pygl	0
BP	GO:0006913	nucleocytoplasmic transport	1/430	67/11595	0.921079036179549	0.979907363055523	gene-il12rb2l	1	il12rb2l	1	gene-il12rb2l	0
BP	GO:0048705	skeletal system morphogenesis	1/430	67/11595	0.921079036179549	0.979907363055523	gene-pthlha	1	pthlha	0	-	1
BP	GO:0051169	nuclear transport	1/430	67/11595	0.921079036179549	0.979907363055523	gene-il12rb2l	1	il12rb2l	1	gene-il12rb2l	0
BP	GO:0051338	regulation of transferase activity	2/430	111/11595	0.921456748417123	0.979907363055523	gene-dok7b/gene-LOC122877917	2	dok7b/LOC122877917	1	gene-LOC122877917	1
BP	GO:0007276	gamete generation	2/430	112/11595	0.923839056348845	0.979935760748134	gene-pgr/gene-LOC122865494	2	LOC122865494/pgr	1	gene-LOC122865494	1
BP	GO:0006886	intracellular protein transport	9/430	361/11595	0.923872946271121	0.979935760748134	gene-si:dkey-13n15.2/gene-LOC122878347/gene-sytl4/gene-tsnare1/gene-LOC122863926/gene-rundc1/gene-il12rb2l/gene-tbc1d14/gene-tbc1d30	9	il12rb2l/LOC122863926/LOC122878347/rundc1/si:dkey-13n15.2/sytl4/tbc1d14/tbc1d30/tsnare1	8	gene-il12rb2l/gene-LOC122863926/gene-LOC122878347/gene-rundc1/gene-si:dkey-13n15.2/gene-tbc1d14/gene-tbc1d30/gene-tsnare1	1
BP	GO:0010647	positive regulation of cell communication	4/430	189/11595	0.924234149084556	0.979935760748134	gene-tmem198a/gene-bambia/gene-LOC122871413/gene-caprin2	4	bambia/caprin2/LOC122871413/tmem198a	3	gene-caprin2/gene-LOC122871413/gene-tmem198a	1
BP	GO:0023056	positive regulation of signaling	4/430	189/11595	0.924234149084556	0.979935760748134	gene-tmem198a/gene-bambia/gene-LOC122871413/gene-caprin2	4	bambia/caprin2/LOC122871413/tmem198a	3	gene-caprin2/gene-LOC122871413/gene-tmem198a	1
BP	GO:0031348	negative regulation of defense response	1/430	69/11595	0.926857057804547	0.981289090320143	gene-LOC122869242	1	LOC122869242	1	gene-LOC122869242	0
BP	GO:0006812	cation transport	3/430	153/11595	0.92688780040064	0.981289090320143	gene-LOC122870126/gene-gem/gene-LOC122868396	3	gem/LOC122868396/LOC122870126	3	gene-gem/gene-LOC122868396/gene-LOC122870126	0
BP	GO:0048609	multicellular organismal reproductive process	2/430	116/11595	0.932704400210059	0.986714009130909	gene-pgr/gene-LOC122865494	2	LOC122865494/pgr	1	gene-LOC122865494	1
BP	GO:0022402	cell cycle process	7/430	301/11595	0.933985600733539	0.987336410270988	gene-LOC122877917/gene-tacc2/gene-LOC122887176/gene-id2a/gene-LOC122865952/gene-LOC122868820/gene-sapcd1	7	id2a/LOC122865952/LOC122868820/LOC122877917/LOC122887176/sapcd1/tacc2	3	gene-LOC122877917/gene-sapcd1/gene-tacc2	4
BP	GO:0045859	regulation of protein kinase activity	1/430	73/11595	0.937177531921022	0.988215676420347	gene-dok7b	1	dok7b	0	-	1
BP	GO:0060341	regulation of cellular localization	1/430	73/11595	0.937177531921022	0.988215676420347	gene-sapcd1	1	sapcd1	1	gene-sapcd1	0
BP	GO:0016310	phosphorylation	5/430	234/11595	0.938494722000858	0.988215676420347	gene-dok7b/gene-LOC122886518/gene-cmpk2/gene-LOC122869123/gene-LOC122871413	5	cmpk2/dok7b/LOC122869123/LOC122871413/LOC122886518	4	gene-cmpk2/gene-LOC122869123/gene-LOC122871413/gene-LOC122886518	1
BP	GO:0032504	multicellular organism reproduction	2/430	119/11595	0.938703621599875	0.988215676420347	gene-pgr/gene-LOC122865494	2	LOC122865494/pgr	1	gene-LOC122865494	1
BP	GO:0055085	transmembrane transport	8/430	339/11595	0.938919076574151	0.988215676420347	gene-LOC122870126/gene-slc12a5a/gene-gem/gene-LOC122882425/gene-kcnj15/gene-kcnj1b/gene-kcnj2a/gene-LOC122871427	8	gem/kcnj15/kcnj1b/kcnj2a/LOC122870126/LOC122871427/LOC122882425/slc12a5a	6	gene-gem/gene-kcnj2a/gene-LOC122870126/gene-LOC122871427/gene-LOC122882425/gene-slc12a5a	2
BP	GO:0043408	regulation of MAPK cascade	1/430	74/11595	0.939522060759241	0.988215676420347	gene-LOC122877917	1	LOC122877917	1	gene-LOC122877917	0
BP	GO:0010605	negative regulation of macromolecule metabolic process	12/430	473/11595	0.940171165710711	0.988215676420347	gene-swap70a/gene-znf703/gene-LOC122877917/gene-snai2/gene-LOC122886518/gene-id2a/gene-jazf1a/gene-LOC122865952/gene-cbx4/gene-cbx8a/gene-LOC122869242/gene-caprin2	12	caprin2/cbx4/cbx8a/id2a/jazf1a/LOC122865952/LOC122869242/LOC122877917/LOC122886518/snai2/swap70a/znf703	4	gene-caprin2/gene-LOC122869242/gene-LOC122877917/gene-LOC122886518	8
BP	GO:0051301	cell division	6/430	271/11595	0.940365233141046	0.988215676420347	gene-LOC122874583/gene-cables2b/gene-LOC122888753/gene-tgfb3/gene-pard6gb/gene-sapcd1	6	cables2b/LOC122874583/LOC122888753/pard6gb/sapcd1/tgfb3	3	gene-cables2b/gene-LOC122888753/gene-sapcd1	3
BP	GO:0006821	chloride transport	1/430	76/11595	0.943952456839966	0.990524485270215	gene-slc12a5a	1	slc12a5a	1	gene-slc12a5a	0
BP	GO:0007283	spermatogenesis	1/430	76/11595	0.943952456839966	0.990524485270215	gene-LOC122865494	1	LOC122865494	1	gene-LOC122865494	0
BP	GO:0043122	regulation of I-kappaB kinase/NF-kappaB signaling	1/430	77/11595	0.94604469084976	0.991756438313018	gene-LOC122869242	1	LOC122869242	1	gene-LOC122869242	0
BP	GO:0034765	regulation of ion transmembrane transport	4/430	203/11595	0.94662449482971	0.991756438313018	gene-gem/gene-kcnj15/gene-kcnj1b/gene-kcnj2a	4	gem/kcnj15/kcnj1b/kcnj2a	2	gene-gem/gene-kcnj2a	2
BP	GO:0006643	membrane lipid metabolic process	1/430	78/11595	0.948058997407721	0.991756438313018	gene-smpdl3b	1	smpdl3b	0	-	1
BP	GO:0003006	developmental process involved in reproduction	2/430	125/11595	0.949214320521919	0.991756438313018	gene-tnca/gene-LOC122865494	2	LOC122865494/tnca	1	gene-LOC122865494	1
BP	GO:0034762	regulation of transmembrane transport	4/430	205/11595	0.949276714264313	0.991756438313018	gene-gem/gene-kcnj15/gene-kcnj1b/gene-kcnj2a	4	gem/kcnj15/kcnj1b/kcnj2a	2	gene-gem/gene-kcnj2a	2
BP	GO:0000165	MAPK cascade	1/430	79/11595	0.949998272489312	0.991756438313018	gene-LOC122877917	1	LOC122877917	1	gene-LOC122877917	0
BP	GO:0048232	male gamete generation	1/430	79/11595	0.949998272489312	0.991756438313018	gene-LOC122865494	1	LOC122865494	1	gene-LOC122865494	0
BP	GO:0006644	phospholipid metabolic process	3/430	168/11595	0.951677317502005	0.992251689234858	gene-plppr3b/gene-plpp3/gene-smpdl3b	3	plpp3/plppr3b/smpdl3b	1	gene-plppr3b	2
BP	GO:0043549	regulation of kinase activity	1/430	80/11595	0.951865304690562	0.992251689234858	gene-dok7b	1	dok7b	0	-	1
BP	GO:1902531	regulation of intracellular signal transduction	7/430	321/11595	0.956707973525732	0.996528987181262	gene-uacab/gene-LOC122877917/gene-arfgef3/gene-snai2/gene-LOC122865952/gene-LOC122869242/gene-LOC122871413	7	arfgef3/LOC122865952/LOC122869242/LOC122871413/LOC122877917/snai2/uacab	4	gene-arfgef3/gene-LOC122869242/gene-LOC122871413/gene-LOC122877917	3
BP	GO:0070925	organelle assembly	6/430	286/11595	0.957367146281508	0.996528987181262	gene-odad3/gene-znf703/gene-vdac3/gene-lrrc39/gene-tbc1d14/gene-rpgrb	6	lrrc39/odad3/rpgrb/tbc1d14/vdac3/znf703	3	gene-lrrc39/gene-tbc1d14/gene-vdac3	3
BP	GO:0006325	chromatin organization	4/430	214/11595	0.959780721274507	0.998312064099396	gene-znf703/gene-snai2/gene-gfi1aa/gene-cbx8a	4	cbx8a/gfi1aa/snai2/znf703	1	gene-gfi1aa	3
BP	GO:0006397	mRNA processing	4/430	215/11595	0.960814740035903	0.998658646645633	gene-cpeb1b/gene-celf5a/gene-celf3a/gene-rbfox1	4	celf3a/celf5a/cpeb1b/rbfox1	3	gene-celf3a/gene-cpeb1b/gene-rbfox1	1
BP	GO:0031396	regulation of protein ubiquitination	1/430	86/11595	0.961693999903327	0.998843986780059	gene-LOC122869242	1	LOC122869242	1	gene-LOC122869242	0
BP	GO:0016579	protein deubiquitination	1/430	87/11595	0.963125191148576	0.998874379466318	gene-usp18	1	usp18	1	gene-usp18	0
BP	GO:0050727	regulation of inflammatory response	1/430	87/11595	0.963125191148576	0.998874379466318	gene-LOC122869242	1	LOC122869242	1	gene-LOC122869242	0
BP	GO:0046486	glycerolipid metabolic process	2/430	137/11595	0.965311242722051	0.999994610889254	gene-lpin1b/gene-si:dkey-172j4.3	2	lpin1b/si:dkey-172j4.3	2	gene-lpin1b/gene-si:dkey-172j4.3	0
BP	GO:0009100	glycoprotein metabolic process	3/430	180/11595	0.965608831286746	0.999994610889254	gene-ndnf/gene-st3gal4/gene-LOC122863823	3	LOC122863823/ndnf/st3gal4	0	-	3
BP	GO:0010629	negative regulation of gene expression	4/430	223/11595	0.968242945151557	0.999996680450688	gene-LOC122877917/gene-cbx8a/gene-LOC122869242/gene-caprin2	4	caprin2/cbx8a/LOC122869242/LOC122877917	3	gene-caprin2/gene-LOC122869242/gene-LOC122877917	1
BP	GO:1903320	regulation of protein modification by small protein conjugation or removal	1/430	91/11595	0.968335909566768	0.999996680450688	gene-LOC122869242	1	LOC122869242	1	gene-LOC122869242	0
BP	GO:0042592	homeostatic process	6/430	299/11595	0.96841463439282	0.999996680450688	gene-swap70a/gene-LOC122881776/gene-LOC122881039/gene-flvcr1/gene-slc31a2/gene-LOC122868396	6	flvcr1/LOC122868396/LOC122881039/LOC122881776/slc31a2/swap70a	4	gene-flvcr1/gene-LOC122868396/gene-LOC122881776/gene-slc31a2	2
BP	GO:0019953	sexual reproduction	2/430	141/11595	0.969491823457221	0.999996680450688	gene-pgr/gene-LOC122865494	2	LOC122865494/pgr	1	gene-LOC122865494	1
BP	GO:0070646	protein modification by small protein removal	1/430	93/11595	0.970658869467171	0.999996680450688	gene-usp18	1	usp18	1	gene-usp18	0
BP	GO:0044703	multi-organism reproductive process	2/430	145/11595	0.973185419187994	0.999996680450688	gene-pgr/gene-LOC122865494	2	LOC122865494/pgr	1	gene-LOC122865494	1
BP	GO:0072594	establishment of protein localization to organelle	1/430	96/11595	0.97382838124994	0.999996680450688	gene-il12rb2l	1	il12rb2l	1	gene-il12rb2l	0
BP	GO:0000226	microtubule cytoskeleton organization	4/430	231/11595	0.974342935673495	0.999996680450688	gene-map1aa/gene-odad3/gene-tacc2/gene-sapcd1	4	map1aa/odad3/sapcd1/tacc2	3	gene-map1aa/gene-sapcd1/gene-tacc2	1
BP	GO:0043604	amide biosynthetic process	7/430	345/11595	0.974553956020483	0.999996680450688	gene-LOC122888945/gene-elovl5/gene-LOC122886518/gene-acaca/gene-arg2/gene-LOC122866314/gene-caprin2	7	acaca/arg2/caprin2/elovl5/LOC122866314/LOC122886518/LOC122888945	7	gene-acaca/gene-arg2/gene-caprin2/gene-elovl5/gene-LOC122866314/gene-LOC122886518/gene-LOC122888945	0
BP	GO:0051704	multi-organism process	2/430	147/11595	0.974866687072907	0.999996680450688	gene-pgr/gene-LOC122865494	2	LOC122865494/pgr	1	gene-LOC122865494	1
BP	GO:0051259	protein complex oligomerization	1/430	105/11595	0.98142997188414	0.999996680450688	gene-trpm6	1	trpm6	0	-	1
BP	GO:0006281	DNA repair	4/430	245/11595	0.982458783402517	0.999996680450688	gene-eya2/gene-cbx8a/gene-LOC122871826/gene-nhej1	4	cbx8a/eya2/LOC122871826/nhej1	0	-	4
BP	GO:0043603	cellular amide metabolic process	9/430	435/11595	0.982812231261216	0.999996680450688	gene-LOC122888945/gene-hal/gene-smpdl3b/gene-elovl5/gene-LOC122886518/gene-acaca/gene-arg2/gene-LOC122866314/gene-caprin2	9	acaca/arg2/caprin2/elovl5/hal/LOC122866314/LOC122886518/LOC122888945/smpdl3b	8	gene-acaca/gene-arg2/gene-caprin2/gene-elovl5/gene-hal/gene-LOC122866314/gene-LOC122886518/gene-LOC122888945	1
BP	GO:0034613	cellular protein localization	10/430	475/11595	0.984329192128584	0.999996680450688	gene-si:dkey-13n15.2/gene-LOC122878347/gene-sytl4/gene-tsnare1/gene-LOC122863926/gene-rundc1/gene-il12rb2l/gene-tbc1d14/gene-tbc1d30/gene-sapcd1	10	il12rb2l/LOC122863926/LOC122878347/rundc1/sapcd1/si:dkey-13n15.2/sytl4/tbc1d14/tbc1d30/tsnare1	9	gene-il12rb2l/gene-LOC122863926/gene-LOC122878347/gene-rundc1/gene-sapcd1/gene-si:dkey-13n15.2/gene-tbc1d14/gene-tbc1d30/gene-tsnare1	1
BP	GO:0070727	cellular macromolecule localization	10/430	475/11595	0.984329192128584	0.999996680450688	gene-si:dkey-13n15.2/gene-LOC122878347/gene-sytl4/gene-tsnare1/gene-LOC122863926/gene-rundc1/gene-il12rb2l/gene-tbc1d14/gene-tbc1d30/gene-sapcd1	10	il12rb2l/LOC122863926/LOC122878347/rundc1/sapcd1/si:dkey-13n15.2/sytl4/tbc1d14/tbc1d30/tsnare1	9	gene-il12rb2l/gene-LOC122863926/gene-LOC122878347/gene-rundc1/gene-sapcd1/gene-si:dkey-13n15.2/gene-tbc1d14/gene-tbc1d30/gene-tsnare1	1
BP	GO:0006486	protein glycosylation	2/430	162/11595	0.984604666445079	0.999996680450688	gene-st3gal4/gene-LOC122863823	2	LOC122863823/st3gal4	0	-	2
BP	GO:0043413	macromolecule glycosylation	2/430	162/11595	0.984604666445079	0.999996680450688	gene-st3gal4/gene-LOC122863823	2	LOC122863823/st3gal4	0	-	2
BP	GO:0006260	DNA replication	1/430	110/11595	0.984654771720178	0.999996680450688	gene-LOC122868820	1	LOC122868820	0	-	1
BP	GO:1902533	positive regulation of intracellular signal transduction	1/430	111/11595	0.985229299204751	0.999996680450688	gene-LOC122871413	1	LOC122871413	1	gene-LOC122871413	0
BP	GO:0070085	glycosylation	2/430	164/11595	0.985586699217329	0.999996680450688	gene-st3gal4/gene-LOC122863823	2	LOC122863823/st3gal4	0	-	2
BP	GO:0022414	reproductive process	3/430	214/11595	0.987340832570641	0.999996680450688	gene-pgr/gene-tnca/gene-LOC122865494	3	LOC122865494/pgr/tnca	1	gene-LOC122865494	2
BP	GO:0000003	reproduction	3/430	215/11595	0.987716201804623	0.999996680450688	gene-pgr/gene-tnca/gene-LOC122865494	3	LOC122865494/pgr/tnca	1	gene-LOC122865494	2
BP	GO:0009101	glycoprotein biosynthetic process	2/430	169/11595	0.98778298570944	0.999996680450688	gene-st3gal4/gene-LOC122863823	2	LOC122863823/st3gal4	0	-	2
BP	GO:0006399	tRNA metabolic process	1/430	116/11595	0.987795562486807	0.999996680450688	gene-LOC122866314	1	LOC122866314	1	gene-LOC122866314	0
BP	GO:0044255	cellular lipid metabolic process	7/430	378/11595	0.988225996637923	0.999996680450688	gene-plppr3b/gene-plpp3/gene-smpdl3b/gene-elovl5/gene-acaca/gene-lpin1b/gene-si:dkey-172j4.3	7	acaca/elovl5/lpin1b/plpp3/plppr3b/si:dkey-172j4.3/smpdl3b	5	gene-acaca/gene-elovl5/gene-lpin1b/gene-plppr3b/gene-si:dkey-172j4.3	2
BP	GO:0007005	mitochondrion organization	1/430	118/11595	0.988692824551196	0.999996680450688	gene-mfn1a	1	mfn1a	1	gene-mfn1a	0
BP	GO:0016071	mRNA metabolic process	4/430	270/11595	0.991281455537151	0.999996680450688	gene-cpeb1b/gene-celf5a/gene-celf3a/gene-rbfox1	4	celf3a/celf5a/cpeb1b/rbfox1	3	gene-celf3a/gene-cpeb1b/gene-rbfox1	1
BP	GO:0043269	regulation of ion transport	4/430	276/11595	0.992653840521859	0.999996680450688	gene-gem/gene-kcnj15/gene-kcnj1b/gene-kcnj2a	4	gem/kcnj15/kcnj1b/kcnj2a	2	gene-gem/gene-kcnj2a	2
BP	GO:0006508	proteolysis	5/430	339/11595	0.99588328586545	0.999996680450688	gene-plat/gene-LOC122877917/gene-LOC122881737/gene-usp18/gene-LOC122871823	5	LOC122871823/LOC122877917/LOC122881737/plat/usp18	3	gene-LOC122877917/gene-plat/gene-usp18	2
BP	GO:0006412	translation	4/430	311/11595	0.997358645837946	0.999996680450688	gene-LOC122888945/gene-LOC122886518/gene-LOC122866314/gene-caprin2	4	caprin2/LOC122866314/LOC122886518/LOC122888945	4	gene-caprin2/gene-LOC122866314/gene-LOC122886518/gene-LOC122888945	0
BP	GO:0043043	peptide biosynthetic process	4/430	313/11595	0.997511438061551	0.999996680450688	gene-LOC122888945/gene-LOC122886518/gene-LOC122866314/gene-caprin2	4	caprin2/LOC122866314/LOC122886518/LOC122888945	4	gene-caprin2/gene-LOC122866314/gene-LOC122886518/gene-LOC122888945	0
BP	GO:0051049	regulation of transport	4/430	321/11595	0.998041416778614	0.999996680450688	gene-gem/gene-kcnj15/gene-kcnj1b/gene-kcnj2a	4	gem/kcnj15/kcnj1b/kcnj2a	2	gene-gem/gene-kcnj2a	2
BP	GO:0033365	protein localization to organelle	1/430	164/11595	0.998054817899328	0.999996680450688	gene-il12rb2l	1	il12rb2l	1	gene-il12rb2l	0
BP	GO:0008380	RNA splicing	1/430	166/11595	0.9981984154064	0.999996680450688	gene-rbfox1	1	rbfox1	1	gene-rbfox1	0
BP	GO:0016567	protein ubiquitination	4/430	337/11595	0.998793142103792	0.999996680450688	gene-sh3rf1/gene-lnx2b/gene-cbx8a/gene-LOC122869242	4	cbx8a/lnx2b/LOC122869242/sh3rf1	1	gene-LOC122869242	3
BP	GO:0051276	chromosome organization	4/430	340/11595	0.998898703708453	0.999996680450688	gene-znf703/gene-snai2/gene-gfi1aa/gene-cbx8a	4	cbx8a/gfi1aa/snai2/znf703	1	gene-gfi1aa	3
BP	GO:0006518	peptide metabolic process	4/430	355/11595	0.999305471973054	0.999996680450688	gene-LOC122888945/gene-LOC122886518/gene-LOC122866314/gene-caprin2	4	caprin2/LOC122866314/LOC122886518/LOC122888945	4	gene-caprin2/gene-LOC122866314/gene-LOC122886518/gene-LOC122888945	0
BP	GO:0032446	protein modification by small protein conjugation	4/430	356/11595	0.999326622915624	0.999996680450688	gene-sh3rf1/gene-lnx2b/gene-cbx8a/gene-LOC122869242	4	cbx8a/lnx2b/LOC122869242/sh3rf1	1	gene-LOC122869242	3
BP	GO:0006511	ubiquitin-dependent protein catabolic process	1/430	209/11595	0.999654742218104	0.999996680450688	gene-usp18	1	usp18	1	gene-usp18	0
BP	GO:0019941	modification-dependent protein catabolic process	1/430	214/11595	0.999715204762623	0.999996680450688	gene-usp18	1	usp18	1	gene-usp18	0
BP	GO:0034660	ncRNA metabolic process	1/430	216/11595	0.999736319547646	0.999996680450688	gene-LOC122866314	1	LOC122866314	1	gene-LOC122866314	0
BP	GO:0043632	modification-dependent macromolecule catabolic process	1/430	216/11595	0.999736319547646	0.999996680450688	gene-usp18	1	usp18	1	gene-usp18	0
BP	GO:0070647	protein modification by small protein conjugation or removal	5/430	447/11595	0.999825535545323	0.999996680450688	gene-sh3rf1/gene-lnx2b/gene-cbx8a/gene-LOC122869242/gene-usp18	5	cbx8a/lnx2b/LOC122869242/sh3rf1/usp18	2	gene-LOC122869242/gene-usp18	3
BP	GO:0051603	proteolysis involved in cellular protein catabolic process	1/430	237/11595	0.999882661561575	0.999996680450688	gene-usp18	1	usp18	1	gene-usp18	0
BP	GO:0044257	cellular protein catabolic process	1/430	241/11595	0.99989944896092	0.999996680450688	gene-usp18	1	usp18	1	gene-usp18	0
BP	GO:0006396	RNA processing	4/430	433/11595	0.99994162057377	0.999996680450688	gene-cpeb1b/gene-celf5a/gene-celf3a/gene-rbfox1	4	celf3a/celf5a/cpeb1b/rbfox1	3	gene-celf3a/gene-cpeb1b/gene-rbfox1	1
BP	GO:0030163	protein catabolic process	1/430	260/11595	0.999951743919727	0.999996680450688	gene-usp18	1	usp18	1	gene-usp18	0
BP	GO:0009057	macromolecule catabolic process	2/430	356/11595	0.999982422875586	0.999996680450688	gene-pglyrp5/gene-usp18	2	pglyrp5/usp18	1	gene-usp18	1
BP	GO:0044265	cellular macromolecule catabolic process	1/430	329/11595	0.999996680450688	0.999996680450688	gene-usp18	1	usp18	1	gene-usp18	0
CC	GO:0005615	extracellular space	33/591	406/15597	3.27128664341892e-05	0.0057901773588515	gene-zgc:171566/gene-LOC122873767/gene-cxcl12b/gene-LOC122873183/gene-LOC122875530/gene-LOC122875558/gene-plat/gene-LOC122876711/gene-LOC122877908/gene-ccl44/gene-podn/gene-serpinf2b/gene-il15l/gene-apln/gene-LOC122880389/gene-il12ba/gene-smpdl3b/gene-LOC122882203/gene-LOC122884604/gene-angptl4/gene-LOC122887564/gene-LOC122888056/gene-tgfb3/gene-loxl3b/gene-LOC122864891/gene-LOC122864898/gene-LOC…	33	angptl4/apln/ccl44/cxcl12b/il12ba/il15l/LOC122864891/LOC122864898/LOC122867036/LOC122867255/LOC122868841/LOC122871823/LOC122873183/LOC122873767/LOC122875530/LOC122875558/LOC122876711/LOC122877908/LOC122880389/LOC122882203/LOC122884604/LOC122887564/LOC122888056/loxl3b/lrrc17/plat/podn/serpinf2b/smpdl3b/tafa5a/tgfb3/ucn3l/zgc:171566	20	gene-apln/gene-il12ba/gene-LOC122864891/gene-LOC122864898/gene-LOC122867036/gene-LOC122867255/gene-LOC122868841/gene-LOC122873183/gene-LOC122873767/gene-LOC122875558/gene-LOC122876711/gene-LOC122877908/gene-LOC122880389/gene-LOC122884604/gene-LOC122888056/gene-plat/gene-podn/gene-serpinf2b/gene-ucn3l/gene-zgc:171566	13
CC	GO:0005884	actin filament	5/591	17/15597	0.000325225929724345	0.0287824947806045	gene-pstpip1b/gene-fmn2a/gene-LOC122861414/gene-fmn1/gene-LOC122867164	5	fmn1/fmn2a/LOC122861414/LOC122867164/pstpip1b	3	gene-fmn1/gene-LOC122861414/gene-pstpip1b	2
CC	GO:0015629	actin cytoskeleton	15/591	198/15597	0.00850731037061936	0.307415350613165	gene-swap70a/gene-pstpip1b/gene-LOC122872091/gene-LOC122870658/gene-afap1l1a/gene-LOC122882192/gene-fmn2a/gene-myo16/gene-afap1l1b/gene-LOC122861414/gene-fmn1/gene-LOC122865508/gene-LOC122867164/gene-myo15b/gene-LOC122868750	15	afap1l1a/afap1l1b/fmn1/fmn2a/LOC122861414/LOC122865508/LOC122867164/LOC122868750/LOC122870658/LOC122872091/LOC122882192/myo15b/myo16/pstpip1b/swap70a	9	gene-afap1l1b/gene-fmn1/gene-LOC122861414/gene-LOC122868750/gene-LOC122870658/gene-LOC122882192/gene-myo15b/gene-myo16/gene-pstpip1b	6
CC	GO:0001533	cornified envelope	3/591	12/15597	0.00921893663810099	0.307415350613165	gene-evpla/gene-LOC122882909/gene-LOC122882907	3	evpla/LOC122882907/LOC122882909	3	gene-evpla/gene-LOC122882907/gene-LOC122882909	0
CC	GO:0030312	external encapsulating structure	14/591	184/15597	0.0104208593428192	0.307415350613165	gene-LOC122867726/gene-lamb3/gene-ndnf/gene-LOC122879137/gene-mmp28/gene-mmp9/gene-lamc2/gene-mmp16b/gene-gpc5c/gene-LOC122887564/gene-matn1/gene-tnca/gene-lrrc17/gene-LOC122872158	14	gpc5c/lamb3/lamc2/LOC122867726/LOC122872158/LOC122879137/LOC122887564/lrrc17/matn1/mmp16b/mmp28/mmp9/ndnf/tnca	6	gene-lamb3/gene-lamc2/gene-LOC122879137/gene-matn1/gene-mmp16b/gene-mmp9	8
CC	GO:0031012	extracellular matrix	14/591	184/15597	0.0104208593428192	0.307415350613165	gene-LOC122867726/gene-lamb3/gene-ndnf/gene-LOC122879137/gene-mmp28/gene-mmp9/gene-lamc2/gene-mmp16b/gene-gpc5c/gene-LOC122887564/gene-matn1/gene-tnca/gene-lrrc17/gene-LOC122872158	14	gpc5c/lamb3/lamc2/LOC122867726/LOC122872158/LOC122879137/LOC122887564/lrrc17/matn1/mmp16b/mmp28/mmp9/ndnf/tnca	6	gene-lamb3/gene-lamc2/gene-LOC122879137/gene-matn1/gene-mmp16b/gene-mmp9	8
CC	GO:0043235	receptor complex	6/591	53/15597	0.0146330430886549	0.370006946670273	gene-itga7/gene-LOC122888504/gene-LOC122883451/gene-itga1/gene-itga3b/gene-LOC122872371	6	itga1/itga3b/itga7/LOC122872371/LOC122883451/LOC122888504	3	gene-itga3b/gene-itga7/gene-LOC122888504	3
CC	GO:0098802	plasma membrane signaling receptor complex	5/591	43/15597	0.0225576082386347	0.499087082279794	gene-itga7/gene-LOC122888504/gene-LOC122883451/gene-itga1/gene-itga3b	5	itga1/itga3b/itga7/LOC122883451/LOC122888504	3	gene-itga3b/gene-itga7/gene-LOC122888504	2
CC	GO:0008305	integrin complex	4/591	32/15597	0.0316687461623076	0.537072187548344	gene-itga7/gene-LOC122888504/gene-itga1/gene-itga3b	4	itga1/itga3b/itga7/LOC122888504	3	gene-itga3b/gene-itga7/gene-LOC122888504	1
CC	GO:0098636	protein complex involved in cell adhesion	4/591	32/15597	0.0316687461623076	0.537072187548344	gene-itga7/gene-LOC122888504/gene-itga1/gene-itga3b	4	itga1/itga3b/itga7/LOC122888504	3	gene-itga3b/gene-itga7/gene-LOC122888504	1
CC	GO:0030057	desmosome	3/591	19/15597	0.0333773675877502	0.537072187548344	gene-LOC122882909/gene-LOC122882907/gene-LOC122869537	3	LOC122869537/LOC122882907/LOC122882909	3	gene-LOC122869537/gene-LOC122882907/gene-LOC122882909	0
CC	GO:0033017	sarcoplasmic reticulum membrane	3/591	20/15597	0.0381922834879682	0.539805309660622	gene-ryr1b/gene-atp2a1l/gene-ryr2a	3	atp2a1l/ryr1b/ryr2a	3	gene-atp2a1l/gene-ryr1b/gene-ryr2a	0
CC	GO:0062023	collagen-containing extracellular matrix	9/591	121/15597	0.0404608181970986	0.539805309660622	gene-LOC122867726/gene-lamb3/gene-LOC122879137/gene-lamc2/gene-gpc5c/gene-LOC122887564/gene-matn1/gene-tnca/gene-LOC122872158	9	gpc5c/lamb3/lamc2/LOC122867726/LOC122872158/LOC122879137/LOC122887564/matn1/tnca	4	gene-lamb3/gene-lamc2/gene-LOC122879137/gene-matn1	5
CC	GO:0032432	actin filament bundle	2/591	10/15597	0.0527237301948602	0.539805309660622	gene-pstpip1b/gene-LOC122872091	2	LOC122872091/pstpip1b	1	gene-pstpip1b	1
CC	GO:0009986	cell surface	5/591	54/15597	0.0530352935606846	0.539805309660622	gene-LOC122883012/gene-cxadr/gene-LOC122870595/gene-LOC122869735/gene-LOC122869738	5	cxadr/LOC122869735/LOC122869738/LOC122870595/LOC122883012	4	gene-cxadr/gene-LOC122869735/gene-LOC122869738/gene-LOC122883012	1
CC	GO:0009897	external side of plasma membrane	3/591	23/15597	0.0546104886297773	0.539805309660622	gene-LOC122883012/gene-LOC122869735/gene-LOC122869738	3	LOC122869735/LOC122869738/LOC122883012	3	gene-LOC122869735/gene-LOC122869738/gene-LOC122883012	0
CC	GO:0016459	myosin complex	6/591	72/15597	0.0549951233550479	0.539805309660622	gene-LOC122870658/gene-LOC122882192/gene-myo16/gene-LOC122865508/gene-myo15b/gene-LOC122868750	6	LOC122865508/LOC122868750/LOC122870658/LOC122882192/myo15b/myo16	5	gene-LOC122868750/gene-LOC122870658/gene-LOC122882192/gene-myo15b/gene-myo16	1
CC	GO:0043296	apical junction complex	7/591	91/15597	0.0571700329496442	0.539805309660622	gene-LOC122872091/gene-LOC122887254/gene-cxadr/gene-cldn11a/gene-pard6gb/gene-pdzph1/gene-sapcd1	7	cldn11a/cxadr/LOC122872091/LOC122887254/pard6gb/pdzph1/sapcd1	5	gene-cldn11a/gene-cxadr/gene-LOC122887254/gene-pdzph1/gene-sapcd1	2
CC	GO:0016010	dystrophin-associated glycoprotein complex	2/591	11/15597	0.0628596203607954	0.539805309660622	gene-LOC122873506/gene-sgcg	2	LOC122873506/sgcg	0	-	2
CC	GO:0090665	glycoprotein complex	2/591	11/15597	0.0628596203607954	0.539805309660622	gene-LOC122873506/gene-sgcg	2	LOC122873506/sgcg	0	-	2
CC	GO:0005911	cell-cell junction	13/591	214/15597	0.064044697756345	0.539805309660622	gene-LOC122872091/gene-amotl2a/gene-LOC122882909/gene-LOC122882907/gene-LOC122887254/gene-cxadr/gene-cldn11a/gene-pard6gb/gene-pdzph1/gene-jcada/gene-LOC122869537/gene-sapcd1/Novel.33	13	amotl2a/cldn11a/cxadr/jcada/LOC122869537/LOC122872091/LOC122882907/LOC122882909/LOC122887254/pard6gb/pdzph1/sapcd1/Novel.33	9	gene-cldn11a/gene-cxadr/gene-LOC122869537/gene-LOC122882907/gene-LOC122882909/gene-LOC122887254/gene-pdzph1/gene-sapcd1/Novel.33	4
CC	GO:0016529	sarcoplasmic reticulum	3/591	29/15597	0.0956160127346625	0.757978258774401	gene-ryr1b/gene-atp2a1l/gene-ryr2a	3	atp2a1l/ryr1b/ryr2a	3	gene-atp2a1l/gene-ryr1b/gene-ryr2a	0
CC	GO:0005923	bicellular tight junction	6/591	85/15597	0.103235674275822	0.757978258774401	gene-LOC122872091/gene-LOC122887254/gene-cxadr/gene-cldn11a/gene-pard6gb/gene-sapcd1	6	cldn11a/cxadr/LOC122872091/LOC122887254/pard6gb/sapcd1	4	gene-cldn11a/gene-cxadr/gene-LOC122887254/gene-sapcd1	2
CC	GO:0070160	tight junction	6/591	85/15597	0.103235674275822	0.757978258774401	gene-LOC122872091/gene-LOC122887254/gene-cxadr/gene-cldn11a/gene-pard6gb/gene-sapcd1	6	cldn11a/cxadr/LOC122872091/LOC122887254/pard6gb/sapcd1	4	gene-cldn11a/gene-cxadr/gene-LOC122887254/gene-sapcd1	2
CC	GO:0005938	cell cortex	5/591	68/15597	0.114972170772516	0.757978258774401	gene-pstpip1b/gene-amotl2a/gene-LOC122888753/gene-si:dkey-196h17.9/gene-sapcd1	5	amotl2a/LOC122888753/pstpip1b/sapcd1/si:dkey-196h17.9	4	gene-LOC122888753/gene-pstpip1b/gene-sapcd1/gene-si:dkey-196h17.9	1
CC	GO:0005887	integral component of plasma membrane	16/591	304/15597	0.116459609212734	0.757978258774401	gene-slc12a5a/gene-itga7/gene-LOC122888504/gene-tmc6b/gene-slc6a15/gene-nlgn1/gene-tmc4/gene-LOC122880951/gene-epha2b/gene-LOC122883451/gene-itga1/gene-itga3b/gene-slc16a3a/gene-si:ch73-40a2.1/gene-LOC122871427/Novel.146	16	epha2b/itga1/itga3b/itga7/LOC122871427/LOC122880951/LOC122883451/LOC122888504/nlgn1/si:ch73-40a2.1/slc12a5a/slc16a3a/slc6a15/tmc4/tmc6b/Novel.146	10	gene-itga3b/gene-itga7/gene-LOC122871427/gene-LOC122880951/gene-LOC122888504/gene-nlgn1/gene-slc12a5a/gene-slc16a3a/gene-slc6a15/gene-tmc4	6
CC	GO:0031226	intrinsic component of plasma membrane	17/591	327/15597	0.117237096118281	0.757978258774401	gene-slc12a5a/gene-itga7/gene-LOC122888504/gene-tmc6b/gene-slc6a15/gene-nlgn1/gene-tmc4/gene-LOC122880951/gene-epha2b/gene-LOC122883451/gene-gpc5c/gene-itga1/gene-itga3b/gene-slc16a3a/gene-si:ch73-40a2.1/gene-LOC122871427/Novel.146	17	epha2b/gpc5c/itga1/itga3b/itga7/LOC122871427/LOC122880951/LOC122883451/LOC122888504/nlgn1/si:ch73-40a2.1/slc12a5a/slc16a3a/slc6a15/tmc4/tmc6b/Novel.146	10	gene-itga3b/gene-itga7/gene-LOC122871427/gene-LOC122880951/gene-LOC122888504/gene-nlgn1/gene-slc12a5a/gene-slc16a3a/gene-slc6a15/gene-tmc4	7
CC	GO:0005667	transcription regulator complex	7/591	109/15597	0.119906165229849	0.757978258774401	gene-smad3a/gene-LOC122863684/gene-smad6b/gene-LOC122877917/gene-epas1b/gene-smad9/gene-smad7	7	epas1b/LOC122863684/LOC122877917/smad3a/smad6b/smad7/smad9	2	gene-epas1b/gene-LOC122877917	5
CC	GO:0016528	sarcoplasm	3/591	34/15597	0.136806103941815	0.834988979231079	gene-ryr1b/gene-atp2a1l/gene-ryr2a	3	atp2a1l/ryr1b/ryr2a	3	gene-atp2a1l/gene-ryr1b/gene-ryr2a	0
CC	GO:0016324	apical plasma membrane	3/591	36/15597	0.15472201175946	0.861736916750751	gene-slc34a1b/gene-pard6gb/gene-sapcd1	3	pard6gb/sapcd1/slc34a1b	2	gene-sapcd1/gene-slc34a1b	1
CC	GO:0070161	anchoring junction	13/591	252/15597	0.161892488909733	0.861736916750751	gene-LOC122872091/gene-amotl2a/gene-LOC122882909/gene-LOC122882907/gene-LOC122887254/gene-cxadr/gene-cldn11a/gene-pard6gb/gene-pdzph1/gene-jcada/gene-LOC122869537/gene-sapcd1/Novel.33	13	amotl2a/cldn11a/cxadr/jcada/LOC122869537/LOC122872091/LOC122882907/LOC122882909/LOC122887254/pard6gb/pdzph1/sapcd1/Novel.33	9	gene-cldn11a/gene-cxadr/gene-LOC122869537/gene-LOC122882907/gene-LOC122882909/gene-LOC122887254/gene-pdzph1/gene-sapcd1/Novel.33	4
CC	GO:0030424	axon	6/591	98/15597	0.16761517990823	0.861736916750751	gene-adgrl3.1/gene-LOC122879031/gene-n4bp3/gene-oprm1/gene-LOC122869123/gene-LOC122870064	6	adgrl3.1/LOC122869123/LOC122870064/LOC122879031/n4bp3/oprm1	4	gene-LOC122869123/gene-LOC122870064/gene-LOC122879031/gene-oprm1	2
CC	GO:0014069	postsynaptic density	4/591	57/15597	0.169294590615793	0.861736916750751	gene-shank3a/gene-cnksr1/gene-LOC122869123/gene-shank1	4	cnksr1/LOC122869123/shank1/shank3a	2	gene-LOC122869123/gene-shank1	2
CC	GO:0032279	asymmetric synapse	4/591	57/15597	0.169294590615793	0.861736916750751	gene-shank3a/gene-cnksr1/gene-LOC122869123/gene-shank1	4	cnksr1/LOC122869123/shank1/shank3a	2	gene-LOC122869123/gene-shank1	2
CC	GO:0098984	neuron to neuron synapse	4/591	58/15597	0.176789229632306	0.861736916750751	gene-shank3a/gene-cnksr1/gene-LOC122869123/gene-shank1	4	cnksr1/LOC122869123/shank1/shank3a	2	gene-LOC122869123/gene-shank1	2
CC	GO:0099572	postsynaptic specialization	4/591	58/15597	0.176789229632306	0.861736916750751	gene-shank3a/gene-cnksr1/gene-LOC122869123/gene-shank1	4	cnksr1/LOC122869123/shank1/shank3a	2	gene-LOC122869123/gene-shank1	2
CC	GO:0032153	cell division site	2/591	21/15597	0.188127091955775	0.861736916750751	gene-pstpip1b/gene-pard6gb	2	pard6gb/pstpip1b	1	gene-pstpip1b	1
CC	GO:0032154	cleavage furrow	2/591	21/15597	0.188127091955775	0.861736916750751	gene-pstpip1b/gene-pard6gb	2	pard6gb/pstpip1b	1	gene-pstpip1b	1
CC	GO:0099513	polymeric cytoskeletal fiber	15/591	307/15597	0.189874235894233	0.861736916750751	gene-map1aa/gene-pstpip1b/gene-synm/gene-amotl2a/gene-mtus2b/gene-vimr2/gene-dnah12/gene-fmn2a/gene-desma/gene-LOC122861414/gene-ngs/gene-fmn1/gene-LOC122863271/gene-LOC122867164/gene-LOC122870458	15	amotl2a/desma/dnah12/fmn1/fmn2a/LOC122861414/LOC122863271/LOC122867164/LOC122870458/map1aa/mtus2b/ngs/pstpip1b/synm/vimr2	10	gene-desma/gene-dnah12/gene-fmn1/gene-LOC122861414/gene-LOC122863271/gene-LOC122870458/gene-map1aa/gene-mtus2b/gene-pstpip1b/gene-vimr2	5
CC	GO:0005604	basement membrane	3/591	42/15597	0.212184932526056	0.900600428011289	gene-lamb3/gene-lamc2/gene-tnca	3	lamb3/lamc2/tnca	2	gene-lamb3/gene-lamc2	1
CC	GO:0005912	adherens junction	3/591	42/15597	0.212184932526056	0.900600428011289	gene-pdzph1/gene-LOC122869537/Novel.33	3	LOC122869537/pdzph1/Novel.33	3	gene-LOC122869537/gene-pdzph1/Novel.33	0
CC	GO:0005882	intermediate filament	4/591	64/15597	0.223878072499981	0.900600428011289	gene-synm/gene-vimr2/gene-desma/gene-ngs	4	desma/ngs/synm/vimr2	2	gene-desma/gene-vimr2	2
CC	GO:0030027	lamellipodium	4/591	64/15597	0.223878072499981	0.900600428011289	gene-swap70a/gene-pstpip1b/gene-sh3rf1/gene-LOC122869123	4	LOC122869123/pstpip1b/sh3rf1/swap70a	2	gene-LOC122869123/gene-pstpip1b	2
CC	GO:0031225	anchored component of membrane	4/591	64/15597	0.223878072499981	0.900600428011289	gene-LOC122873566/gene-omgb/gene-gpc5c/gene-efna1a	4	efna1a/gpc5c/LOC122873566/omgb	2	gene-efna1a/gene-omgb	2
CC	GO:0045177	apical part of cell	3/591	44/15597	0.232274504440044	0.913613050797508	gene-slc34a1b/gene-pard6gb/gene-sapcd1	3	pard6gb/sapcd1/slc34a1b	2	gene-sapcd1/gene-slc34a1b	1
CC	GO:0000118	histone deacetylase complex	2/591	25/15597	0.244409034894826	0.916477842809976	gene-znf703/gene-hdac9b	2	hdac9b/znf703	1	gene-hdac9b	1
CC	GO:0030133	transport vesicle	5/591	89/15597	0.248051432918281	0.916477842809976	gene-si:dkey-13n15.2/gene-apba1a/gene-ptprna/gene-LOC122869272/gene-LOC122871213	5	apba1a/LOC122869272/LOC122871213/ptprna/si:dkey-13n15.2	4	gene-apba1a/gene-LOC122869272/gene-ptprna/gene-si:dkey-13n15.2	1
CC	GO:0045111	intermediate filament cytoskeleton	4/591	67/15597	0.248536364151858	0.916477842809976	gene-synm/gene-vimr2/gene-desma/gene-ngs	4	desma/ngs/synm/vimr2	2	gene-desma/gene-vimr2	2
CC	GO:0005776	autophagosome	2/591	26/15597	0.258623571866324	0.934211677966111	gene-sqstm1/gene-tbc1d14	2	sqstm1/tbc1d14	2	gene-sqstm1/gene-tbc1d14	0
CC	GO:0016607	nuclear speck	4/591	72/15597	0.290774110844719	0.976652311637866	gene-wt1b/gene-LOC122882909/gene-LOC122882907/gene-LOC122868820	4	LOC122868820/LOC122882907/LOC122882909/wt1b	3	gene-LOC122882907/gene-LOC122882909/gene-wt1b	1
CC	GO:0042383	sarcolemma	2/591	30/15597	0.315372522607461	0.976652311637866	gene-LOC122873506/gene-sgcg	2	LOC122873506/sgcg	0	-	2
CC	GO:0031519	PcG protein complex	1/591	10/15597	0.320500204798982	0.976652311637866	gene-cbx8a	1	cbx8a	0	-	1
CC	GO:0042641	actomyosin	1/591	10/15597	0.320500204798982	0.976652311637866	gene-pstpip1b	1	pstpip1b	1	gene-pstpip1b	0
CC	GO:0099738	cell cortex region	1/591	10/15597	0.320500204798982	0.976652311637866	gene-sapcd1	1	sapcd1	1	gene-sapcd1	0
CC	GO:0030658	transport vesicle membrane	3/591	53/15597	0.325558212720292	0.976652311637866	gene-si:dkey-13n15.2/gene-ptprna/gene-LOC122869272	3	LOC122869272/ptprna/si:dkey-13n15.2	3	gene-LOC122869272/gene-ptprna/gene-si:dkey-13n15.2	0
CC	GO:0042611	MHC protein complex	1/591	11/15597	0.346264263242801	0.976652311637866	gene-b2m	1	b2m	1	gene-b2m	0
CC	GO:0043209	myelin sheath	1/591	11/15597	0.346264263242801	0.976652311637866	gene-omgb	1	omgb	1	gene-omgb	0
CC	GO:0099503	secretory vesicle	4/591	79/15597	0.351220197723877	0.976652311637866	gene-apba1a/gene-ptprna/gene-LOC122868841/gene-LOC122871213	4	apba1a/LOC122868841/LOC122871213/ptprna	3	gene-apba1a/gene-LOC122868841/gene-ptprna	1
CC	GO:0005902	microvillus	1/591	12/15597	0.371053036528025	0.976652311637866	gene-cd44b	1	cd44b	0	-	1
CC	GO:0030127	COPII vesicle coat	1/591	12/15597	0.371053036528025	0.976652311637866	gene-si:dkey-13n15.2	1	si:dkey-13n15.2	1	gene-si:dkey-13n15.2	0
CC	GO:0030864	cortical actin cytoskeleton	1/591	12/15597	0.371053036528025	0.976652311637866	gene-pstpip1b	1	pstpip1b	1	gene-pstpip1b	0
CC	GO:0033180	proton-transporting V-type ATPase, V1 domain	1/591	12/15597	0.371053036528025	0.976652311637866	gene-atp6v1c1b	1	atp6v1c1b	1	gene-atp6v1c1b	0
CC	GO:0000159	protein phosphatase type 2A complex	1/591	13/15597	0.394903383362285	0.976652311637866	gene-ppp2r5b	1	ppp2r5b	1	gene-ppp2r5b	0
CC	GO:0030863	cortical cytoskeleton	1/591	13/15597	0.394903383362285	0.976652311637866	gene-pstpip1b	1	pstpip1b	1	gene-pstpip1b	0
CC	GO:0061702	inflammasome complex	1/591	13/15597	0.394903383362285	0.976652311637866	gene-LOC122881737	1	LOC122881737	0	-	1
CC	GO:0098839	postsynaptic density membrane	1/591	13/15597	0.394903383362285	0.976652311637866	gene-cnksr1	1	cnksr1	0	-	1
CC	GO:0019897	extrinsic component of plasma membrane	2/591	36/15597	0.398288074070313	0.976652311637866	gene-cnksr1/gene-LOC122869537	2	cnksr1/LOC122869537	1	gene-LOC122869537	1
CC	GO:0098978	glutamatergic synapse	2/591	36/15597	0.398288074070313	0.976652311637866	gene-cnksr1/gene-LOC122869123	2	cnksr1/LOC122869123	1	gene-LOC122869123	1
CC	GO:0043005	neuron projection	9/591	212/15597	0.412136560476949	0.976652311637866	gene-LOC122872091/gene-adgrl3.1/gene-LOC122879031/gene-n4bp3/gene-elovl5/gene-oprm1/gene-cnksr1/gene-LOC122869123/gene-LOC122870064	9	adgrl3.1/cnksr1/elovl5/LOC122869123/LOC122870064/LOC122872091/LOC122879031/n4bp3/oprm1	5	gene-elovl5/gene-LOC122869123/gene-LOC122870064/gene-LOC122879031/gene-oprm1	4
CC	GO:0031252	cell leading edge	5/591	111/15597	0.412215783435194	0.976652311637866	gene-swap70a/gene-pstpip1b/gene-sh3rf1/gene-LOC122867164/gene-LOC122869123	5	LOC122867164/LOC122869123/pstpip1b/sh3rf1/swap70a	2	gene-LOC122869123/gene-pstpip1b	3
CC	GO:0012507	ER to Golgi transport vesicle membrane	1/591	14/15597	0.417850771737085	0.976652311637866	gene-si:dkey-13n15.2	1	si:dkey-13n15.2	1	gene-si:dkey-13n15.2	0
CC	GO:0030134	COPII-coated ER to Golgi transport vesicle	1/591	14/15597	0.417850771737085	0.976652311637866	gene-si:dkey-13n15.2	1	si:dkey-13n15.2	1	gene-si:dkey-13n15.2	0
CC	GO:0099634	postsynaptic specialization membrane	1/591	14/15597	0.417850771737085	0.976652311637866	gene-cnksr1	1	cnksr1	0	-	1
CC	GO:0005795	Golgi stack	2/591	38/15597	0.424921562596582	0.976652311637866	gene-arhgef38/gene-clip3	2	arhgef38/clip3	2	gene-arhgef38/gene-clip3	0
CC	GO:0030659	cytoplasmic vesicle membrane	6/591	138/15597	0.425076808112721	0.976652311637866	gene-si:dkey-13n15.2/gene-myofl/gene-ptprna/gene-LOC122869272/Novel.22/Novel.34	6	LOC122869272/myofl/ptprna/si:dkey-13n15.2/Novel.22/Novel.34	5	gene-LOC122869272/gene-ptprna/gene-si:dkey-13n15.2/Novel.22/Novel.34	1
CC	GO:0012506	vesicle membrane	6/591	139/15597	0.43184459050185	0.976652311637866	gene-si:dkey-13n15.2/gene-myofl/gene-ptprna/gene-LOC122869272/Novel.22/Novel.34	6	LOC122869272/myofl/ptprna/si:dkey-13n15.2/Novel.22/Novel.34	5	gene-LOC122869272/gene-ptprna/gene-si:dkey-13n15.2/Novel.22/Novel.34	1
CC	GO:0030141	secretory granule	2/591	39/15597	0.438006856306193	0.976652311637866	gene-ptprna/gene-LOC122868841	2	LOC122868841/ptprna	2	gene-LOC122868841/gene-ptprna	0
CC	GO:0098552	side of membrane	3/591	64/15597	0.439169074903012	0.976652311637866	gene-LOC122883012/gene-LOC122869735/gene-LOC122869738	3	LOC122869735/LOC122869738/LOC122883012	3	gene-LOC122869735/gene-LOC122869738/gene-LOC122883012	0
CC	GO:0099081	supramolecular polymer	16/591	400/15597	0.448421131930781	0.976652311637866	gene-map1aa/gene-pstpip1b/gene-parvb/gene-synm/gene-amotl2a/gene-mtus2b/gene-vimr2/gene-dnah12/gene-fmn2a/gene-desma/gene-LOC122861414/gene-ngs/gene-fmn1/gene-LOC122863271/gene-LOC122867164/gene-LOC122870458	16	amotl2a/desma/dnah12/fmn1/fmn2a/LOC122861414/LOC122863271/LOC122867164/LOC122870458/map1aa/mtus2b/ngs/parvb/pstpip1b/synm/vimr2	11	gene-desma/gene-dnah12/gene-fmn1/gene-LOC122861414/gene-LOC122863271/gene-LOC122870458/gene-map1aa/gene-mtus2b/gene-parvb/gene-pstpip1b/gene-vimr2	5
CC	GO:0099512	supramolecular fiber	16/591	400/15597	0.448421131930781	0.976652311637866	gene-map1aa/gene-pstpip1b/gene-parvb/gene-synm/gene-amotl2a/gene-mtus2b/gene-vimr2/gene-dnah12/gene-fmn2a/gene-desma/gene-LOC122861414/gene-ngs/gene-fmn1/gene-LOC122863271/gene-LOC122867164/gene-LOC122870458	16	amotl2a/desma/dnah12/fmn1/fmn2a/LOC122861414/LOC122863271/LOC122867164/LOC122870458/map1aa/mtus2b/ngs/parvb/pstpip1b/synm/vimr2	11	gene-desma/gene-dnah12/gene-fmn1/gene-LOC122861414/gene-LOC122863271/gene-LOC122870458/gene-map1aa/gene-mtus2b/gene-parvb/gene-pstpip1b/gene-vimr2	5
CC	GO:0036477	somatodendritic compartment	5/591	116/15597	0.449663334075869	0.976652311637866	gene-LOC122879031/gene-n4bp3/gene-elovl5/gene-oprm1/gene-cnksr1	5	cnksr1/elovl5/LOC122879031/n4bp3/oprm1	3	gene-elovl5/gene-LOC122879031/gene-oprm1	2
CC	GO:0016605	PML body	1/591	16/15597	0.461171903846995	0.976652311637866	gene-LOC122871826	1	LOC122871826	0	-	1
CC	GO:0005802	trans-Golgi network	2/591	41/15597	0.463678857685833	0.976652311637866	gene-LOC122883087/gene-rab32a	2	LOC122883087/rab32a	2	gene-LOC122883087/gene-rab32a	0
CC	GO:0008021	synaptic vesicle	2/591	41/15597	0.463678857685833	0.976652311637866	gene-apba1a/gene-LOC122871213	2	apba1a/LOC122871213	1	gene-apba1a	1
CC	GO:0019898	extrinsic component of membrane	3/591	67/15597	0.469013821972987	0.976652311637866	gene-LOC122873544/gene-cnksr1/gene-LOC122869537	3	cnksr1/LOC122869537/LOC122873544	2	gene-LOC122869537/gene-LOC122873544	1
CC	GO:0070382	exocytic vesicle	2/591	44/15597	0.500855410843964	0.999993249660622	gene-apba1a/gene-LOC122871213	2	apba1a/LOC122871213	1	gene-apba1a	1
CC	GO:0000145	exocyst	1/591	18/15597	0.501274304517604	0.999993249660622	gene-si:dkey-196h17.9	1	si:dkey-196h17.9	1	gene-si:dkey-196h17.9	0
CC	GO:0000152	nuclear ubiquitin ligase complex	1/591	20/15597	0.53839674823503	0.999993249660622	gene-cbx8a	1	cbx8a	0	-	1
CC	GO:0030286	dynein complex	2/591	48/15597	0.547767017481158	0.999993249660622	gene-dnah12/gene-LOC122870458	2	dnah12/LOC122870458	2	gene-dnah12/gene-LOC122870458	0
CC	GO:0033178	proton-transporting two-sector ATPase complex, catalytic domain	1/591	21/15597	0.555910231048993	0.999993249660622	gene-atp6v1c1b	1	atp6v1c1b	1	gene-atp6v1c1b	0
CC	GO:0016604	nuclear body	5/591	131/15597	0.557138869084349	0.999993249660622	gene-wt1b/gene-LOC122882909/gene-LOC122882907/gene-LOC122868820/gene-LOC122871826	5	LOC122868820/LOC122871826/LOC122882907/LOC122882909/wt1b	3	gene-LOC122882907/gene-LOC122882909/gene-wt1b	2
CC	GO:0098858	actin-based cell projection	2/591	49/15597	0.559002245234463	0.999993249660622	gene-cd44b/gene-LOC122869123	2	cd44b/LOC122869123	1	gene-LOC122869123	1
CC	GO:0005881	cytoplasmic microtubule	1/591	22/15597	0.572760324362427	0.999993249660622	gene-mtus2b	1	mtus2b	1	gene-mtus2b	0
CC	GO:0046658	anchored component of plasma membrane	1/591	22/15597	0.572760324362427	0.999993249660622	gene-gpc5c	1	gpc5c	0	-	1
CC	GO:0030136	clathrin-coated vesicle	2/591	51/15597	0.580870473218618	0.999993249660622	gene-snap91a/gene-LOC122888042	2	LOC122888042/snap91a	2	gene-LOC122888042/gene-snap91a	0
CC	GO:0030135	coated vesicle	3/591	80/15597	0.588795278522269	0.999993249660622	gene-si:dkey-13n15.2/gene-snap91a/gene-LOC122888042	3	LOC122888042/si:dkey-13n15.2/snap91a	3	gene-LOC122888042/gene-si:dkey-13n15.2/gene-snap91a	0
CC	GO:0098862	cluster of actin-based cell projections	1/591	23/15597	0.588972115585656	0.999993249660622	gene-LOC122873183	1	LOC122873183	1	gene-LOC122873183	0
CC	GO:0000323	lytic vacuole	5/591	136/15597	0.590618538088372	0.999993249660622	gene-LOC122873183/gene-LOC122876711/gene-sqstm1/gene-mroh1/gene-gnsb	5	gnsb/LOC122873183/LOC122876711/mroh1/sqstm1	5	gene-gnsb/gene-LOC122873183/gene-LOC122876711/gene-mroh1/gene-sqstm1	0
CC	GO:0005764	lysosome	5/591	136/15597	0.590618538088372	0.999993249660622	gene-LOC122873183/gene-LOC122876711/gene-sqstm1/gene-mroh1/gene-gnsb	5	gnsb/LOC122873183/LOC122876711/mroh1/sqstm1	5	gene-gnsb/gene-LOC122873183/gene-LOC122876711/gene-mroh1/gene-sqstm1	0
CC	GO:0043025	neuronal cell body	2/591	53/15597	0.601931065672045	0.999993249660622	gene-oprm1/gene-cnksr1	2	cnksr1/oprm1	1	gene-oprm1	1
CC	GO:0055037	recycling endosome	2/591	53/15597	0.601931065672045	0.999993249660622	gene-LOC122872091/gene-tbc1d14	2	LOC122872091/tbc1d14	1	gene-tbc1d14	1
CC	GO:0030426	growth cone	1/591	24/15597	0.604569744947983	0.999993249660622	gene-LOC122869123	1	LOC122869123	1	gene-LOC122869123	0
CC	GO:0030427	site of polarized growth	1/591	24/15597	0.604569744947983	0.999993249660622	gene-LOC122869123	1	LOC122869123	1	gene-LOC122869123	0
CC	GO:0048786	presynaptic active zone	1/591	24/15597	0.604569744947983	0.999993249660622	gene-pclob	1	pclob	1	gene-pclob	0
CC	GO:0005773	vacuole	6/591	167/15597	0.610410678066218	0.999993249660622	gene-LOC122873183/gene-LOC122876711/gene-sqstm1/gene-mroh1/gene-gnsb/gene-tbc1d14	6	gnsb/LOC122873183/LOC122876711/mroh1/sqstm1/tbc1d14	6	gene-gnsb/gene-LOC122873183/gene-LOC122876711/gene-mroh1/gene-sqstm1/gene-tbc1d14	0
CC	GO:0033176	proton-transporting V-type ATPase complex	1/591	25/15597	0.619576441200198	0.999993249660622	gene-atp6v1c1b	1	atp6v1c1b	1	gene-atp6v1c1b	0
CC	GO:0046930	pore complex	1/591	25/15597	0.619576441200198	0.999993249660622	gene-vdac3	1	vdac3	1	gene-vdac3	0
CC	GO:0044297	cell body	2/591	57/15597	0.641630031944701	0.999993249660622	gene-oprm1/gene-cnksr1	2	cnksr1/oprm1	1	gene-oprm1	1
CC	GO:0005581	collagen trimer	3/591	88/15597	0.653298837475957	0.999993249660622	gene-LOC122875223/gene-LOC122885916/gene-colec12	3	colec12/LOC122875223/LOC122885916	3	gene-colec12/gene-LOC122875223/gene-LOC122885916	0
CC	GO:0030425	dendrite	3/591	92/15597	0.682713660287991	0.999993249660622	gene-LOC122879031/gene-n4bp3/gene-elovl5	3	elovl5/LOC122879031/n4bp3	2	gene-elovl5/gene-LOC122879031	1
CC	GO:0097447	dendritic tree	3/591	92/15597	0.682713660287991	0.999993249660622	gene-LOC122879031/gene-n4bp3/gene-elovl5	3	elovl5/LOC122879031/n4bp3	2	gene-elovl5/gene-LOC122879031	1
CC	GO:0008287	protein serine/threonine phosphatase complex	1/591	30/15597	0.686499350936862	0.999993249660622	gene-ppp2r5b	1	ppp2r5b	1	gene-ppp2r5b	0
CC	GO:0030018	Z disc	1/591	30/15597	0.686499350936862	0.999993249660622	gene-parvb	1	parvb	1	gene-parvb	0
CC	GO:0042470	melanosome	1/591	30/15597	0.686499350936862	0.999993249660622	gene-LOC122885551	1	LOC122885551	1	gene-LOC122885551	0
CC	GO:0048770	pigment granule	1/591	30/15597	0.686499350936862	0.999993249660622	gene-LOC122885551	1	LOC122885551	1	gene-LOC122885551	0
CC	GO:1903293	phosphatase complex	1/591	30/15597	0.686499350936862	0.999993249660622	gene-ppp2r5b	1	ppp2r5b	1	gene-ppp2r5b	0
CC	GO:0098797	plasma membrane protein complex	9/591	267/15597	0.686724535639872	0.999993249660622	gene-itga7/gene-LOC122888504/gene-LOC122873506/gene-sgcg/gene-LOC122883451/gene-itga1/gene-itga3b/gene-LOC122869537/gene-b2m	9	b2m/itga1/itga3b/itga7/LOC122869537/LOC122873506/LOC122883451/LOC122888504/sgcg	5	gene-b2m/gene-itga3b/gene-itga7/gene-LOC122869537/gene-LOC122888504	4
CC	GO:0098793	presynapse	3/591	95/15597	0.70352849456083	0.999993249660622	gene-pclob/gene-apba1a/gene-LOC122871213	3	apba1a/LOC122871213/pclob	2	gene-apba1a/gene-pclob	1
CC	GO:0150034	distal axon	1/591	32/15597	0.709852284644613	0.999993249660622	gene-LOC122869123	1	LOC122869123	1	gene-LOC122869123	0
CC	GO:0030175	filopodium	1/591	33/15597	0.7208691365415	0.999993249660622	gene-LOC122869123	1	LOC122869123	1	gene-LOC122869123	0
CC	GO:0045202	synapse	14/591	421/15597	0.729616177825305	0.999993249660622	gene-chrna3/gene-slc12a5a/gene-pclob/gene-shank3a/gene-LOC122874997/gene-apba1a/gene-nlgn1/gene-LOC122883451/gene-ptprna/gene-dlgap2a/gene-cnksr1/gene-LOC122869123/gene-shank1/gene-LOC122871213	14	apba1a/chrna3/cnksr1/dlgap2a/LOC122869123/LOC122871213/LOC122874997/LOC122883451/nlgn1/pclob/ptprna/shank1/shank3a/slc12a5a	8	gene-apba1a/gene-dlgap2a/gene-LOC122869123/gene-nlgn1/gene-pclob/gene-ptprna/gene-shank1/gene-slc12a5a	6
CC	GO:0099080	supramolecular complex	16/591	481/15597	0.739310658017427	0.999993249660622	gene-map1aa/gene-pstpip1b/gene-parvb/gene-synm/gene-amotl2a/gene-mtus2b/gene-vimr2/gene-dnah12/gene-fmn2a/gene-desma/gene-LOC122861414/gene-ngs/gene-fmn1/gene-LOC122863271/gene-LOC122867164/gene-LOC122870458	16	amotl2a/desma/dnah12/fmn1/fmn2a/LOC122861414/LOC122863271/LOC122867164/LOC122870458/map1aa/mtus2b/ngs/parvb/pstpip1b/synm/vimr2	11	gene-desma/gene-dnah12/gene-fmn1/gene-LOC122861414/gene-LOC122863271/gene-LOC122870458/gene-map1aa/gene-mtus2b/gene-parvb/gene-pstpip1b/gene-vimr2	5
CC	GO:0030120	vesicle coat	1/591	35/15597	0.741665765682187	0.999993249660622	gene-si:dkey-13n15.2	1	si:dkey-13n15.2	1	gene-si:dkey-13n15.2	0
CC	GO:0005741	mitochondrial outer membrane	2/591	69/15597	0.742034360780796	0.999993249660622	gene-vdac3/gene-mfn1a	2	mfn1a/vdac3	2	gene-mfn1a/gene-vdac3	0
CC	GO:0031674	I band	1/591	36/15597	0.751476556871097	0.999993249660622	gene-parvb	1	parvb	1	gene-parvb	0
CC	GO:0043204	perikaryon	1/591	36/15597	0.751476556871097	0.999993249660622	gene-oprm1	1	oprm1	1	gene-oprm1	0
CC	GO:0099023	vesicle tethering complex	1/591	36/15597	0.751476556871097	0.999993249660622	gene-si:dkey-196h17.9	1	si:dkey-196h17.9	1	gene-si:dkey-196h17.9	0
CC	GO:0005875	microtubule associated complex	2/591	72/15597	0.763042059334614	0.999993249660622	gene-dnah12/gene-LOC122870458	2	dnah12/LOC122870458	2	gene-dnah12/gene-LOC122870458	0
CC	GO:0000785	chromatin	5/591	173/15597	0.789379731458225	0.999993249660622	gene-LOC122877917/gene-dpf1/gene-snai2/gene-wbp2/gene-cbx8a	5	cbx8a/dpf1/LOC122877917/snai2/wbp2	3	gene-dpf1/gene-LOC122877917/gene-wbp2	2
CC	GO:0019867	outer membrane	2/591	79/15597	0.806360352108017	0.999993249660622	gene-vdac3/gene-mfn1a	2	mfn1a/vdac3	2	gene-mfn1a/gene-vdac3	0
CC	GO:0031968	organelle outer membrane	2/591	79/15597	0.806360352108017	0.999993249660622	gene-vdac3/gene-mfn1a	2	mfn1a/vdac3	2	gene-mfn1a/gene-vdac3	0
CC	GO:0098794	postsynapse	6/591	215/15597	0.82895271448274	0.999993249660622	gene-chrna3/gene-shank3a/gene-LOC122883451/gene-cnksr1/gene-LOC122869123/gene-shank1	6	chrna3/cnksr1/LOC122869123/LOC122883451/shank1/shank3a	2	gene-LOC122869123/gene-shank1	4
CC	GO:0001726	ruffle	1/591	47/15597	0.837694211965564	0.999993249660622	gene-LOC122867164	1	LOC122867164	0	-	1
CC	GO:0099568	cytoplasmic region	1/591	49/15597	0.849797472145572	0.999993249660622	gene-sapcd1	1	sapcd1	1	gene-sapcd1	0
CC	GO:0070603	SWI/SNF superfamily-type complex	1/591	50/15597	0.855506868464196	0.999993249660622	gene-dpf1	1	dpf1	1	gene-dpf1	0
CC	GO:0016469	proton-transporting two-sector ATPase complex	1/591	51/15597	0.860999596369108	0.999993249660622	gene-atp6v1c1b	1	atp6v1c1b	1	gene-atp6v1c1b	0
CC	GO:0030662	coated vesicle membrane	1/591	52/15597	0.866283864897724	0.999993249660622	gene-si:dkey-13n15.2	1	si:dkey-13n15.2	1	gene-si:dkey-13n15.2	0
CC	GO:0005777	peroxisome	1/591	55/15597	0.880963416829765	0.999993249660622	gene-LOC122876127	1	LOC122876127	1	gene-LOC122876127	0
CC	GO:0042579	microbody	1/591	55/15597	0.880963416829765	0.999993249660622	gene-LOC122876127	1	LOC122876127	1	gene-LOC122876127	0
CC	GO:0034451	centriolar satellite	1/591	59/15597	0.898064097727409	0.999993249660622	gene-LOC122869242	1	LOC122869242	1	gene-LOC122869242	0
CC	GO:0045211	postsynaptic membrane	3/591	138/15597	0.898903376780361	0.999993249660622	gene-chrna3/gene-LOC122883451/gene-cnksr1	3	chrna3/cnksr1/LOC122883451	0	-	3
CC	GO:1904949	ATPase complex	1/591	60/15597	0.901941309610733	0.999993249660622	gene-dpf1	1	dpf1	1	gene-dpf1	0
CC	GO:0030117	membrane coat	1/591	64/15597	0.916032600197542	0.999993249660622	gene-si:dkey-13n15.2	1	si:dkey-13n15.2	1	gene-si:dkey-13n15.2	0
CC	GO:0048475	coated membrane	1/591	64/15597	0.916032600197542	0.999993249660622	gene-si:dkey-13n15.2	1	si:dkey-13n15.2	1	gene-si:dkey-13n15.2	0
CC	GO:0061695	transferase complex, transferring phosphorus-containing groups	1/591	66/15597	0.922300830212455	0.999993249660622	gene-LOC122873544	1	LOC122873544	1	gene-LOC122873544	0
CC	GO:0097060	synaptic membrane	3/591	148/15597	0.922996751404408	0.999993249660622	gene-chrna3/gene-LOC122883451/gene-cnksr1	3	chrna3/cnksr1/LOC122883451	0	-	3
CC	GO:0005813	centrosome	3/591	150/15597	0.92713573541677	0.999993249660622	gene-mtus2b/gene-pdzph1/gene-LOC122869242	3	LOC122869242/mtus2b/pdzph1	3	gene-LOC122869242/gene-mtus2b/gene-pdzph1	0
CC	GO:0005874	microtubule	5/591	226/15597	0.933491760152504	0.999993249660622	gene-map1aa/gene-mtus2b/gene-dnah12/gene-LOC122863271/gene-LOC122870458	5	dnah12/LOC122863271/LOC122870458/map1aa/mtus2b	5	gene-dnah12/gene-LOC122863271/gene-LOC122870458/gene-map1aa/gene-mtus2b	0
CC	GO:0048471	perinuclear region of cytoplasm	3/591	157/15597	0.940065586397909	0.999993249660622	gene-pstpip1b/gene-sh3rf1/gene-LOC122869242	3	LOC122869242/pstpip1b/sh3rf1	2	gene-LOC122869242/gene-pstpip1b	1
CC	GO:0005768	endosome	6/591	269/15597	0.944742040333046	0.999993249660622	gene-grap2b/gene-LOC122872091/gene-LOC122883087/gene-wdfy4/gene-tbc1d14/gene-LOC122870595	6	grap2b/LOC122870595/LOC122872091/LOC122883087/tbc1d14/wdfy4	4	gene-grap2b/gene-LOC122883087/gene-tbc1d14/gene-wdfy4	2
CC	GO:0030017	sarcomere	1/591	78/15597	0.951229470833769	0.999993249660622	gene-parvb	1	parvb	1	gene-parvb	0
CC	GO:0030016	myofibril	1/591	80/15597	0.954873448537679	0.999993249660622	gene-parvb	1	parvb	1	gene-parvb	0
CC	GO:0043292	contractile fiber	1/591	80/15597	0.954873448537679	0.999993249660622	gene-parvb	1	parvb	1	gene-parvb	0
CC	GO:0005789	endoplasmic reticulum membrane	9/591	381/15597	0.955026266578328	0.999993249660622	gene-si:dkey-13n15.2/gene-soat1/gene-ryr1b/gene-elovl5/gene-rsad2/gene-LOC122863823/gene-atp2a1l/gene-ryr2a/gene-nfe2l1a	9	atp2a1l/elovl5/LOC122863823/nfe2l1a/rsad2/ryr1b/ryr2a/si:dkey-13n15.2/soat1	8	gene-atp2a1l/gene-elovl5/gene-nfe2l1a/gene-rsad2/gene-ryr1b/gene-ryr2a/gene-si:dkey-13n15.2/gene-soat1	1
CC	GO:0098827	endoplasmic reticulum subcompartment	9/591	381/15597	0.955026266578328	0.999993249660622	gene-si:dkey-13n15.2/gene-soat1/gene-ryr1b/gene-elovl5/gene-rsad2/gene-LOC122863823/gene-atp2a1l/gene-ryr2a/gene-nfe2l1a	9	atp2a1l/elovl5/LOC122863823/nfe2l1a/rsad2/ryr1b/ryr2a/si:dkey-13n15.2/soat1	8	gene-atp2a1l/gene-elovl5/gene-nfe2l1a/gene-rsad2/gene-ryr1b/gene-ryr2a/gene-si:dkey-13n15.2/gene-soat1	1
CC	GO:0098590	plasma membrane region	7/591	315/15597	0.956992722799506	0.999993249660622	gene-pstpip1b/gene-chrna3/gene-slc34a1b/gene-LOC122883451/gene-cnksr1/gene-pard6gb/gene-sapcd1	7	chrna3/cnksr1/LOC122883451/pard6gb/pstpip1b/sapcd1/slc34a1b	3	gene-pstpip1b/gene-sapcd1/gene-slc34a1b	4
CC	GO:0042175	nuclear outer membrane-endoplasmic reticulum membrane network	9/591	392/15597	0.964018736631027	0.999993249660622	gene-si:dkey-13n15.2/gene-soat1/gene-ryr1b/gene-elovl5/gene-rsad2/gene-LOC122863823/gene-atp2a1l/gene-ryr2a/gene-nfe2l1a	9	atp2a1l/elovl5/LOC122863823/nfe2l1a/rsad2/ryr1b/ryr2a/si:dkey-13n15.2/soat1	8	gene-atp2a1l/gene-elovl5/gene-nfe2l1a/gene-rsad2/gene-ryr1b/gene-ryr2a/gene-si:dkey-13n15.2/gene-soat1	1
CC	GO:0005769	early endosome	1/591	104/15597	0.982242483872817	0.999993249660622	gene-wdfy4	1	wdfy4	1	gene-wdfy4	0
CC	GO:0005815	microtubule organizing center	5/591	280/15597	0.982722435473686	0.999993249660622	gene-mtus2b/gene-wu:fa11c10/gene-LOC122886404/gene-pdzph1/gene-LOC122869242	5	LOC122869242/LOC122886404/mtus2b/pdzph1/wu:fa11c10	4	gene-LOC122869242/gene-LOC122886404/gene-mtus2b/gene-pdzph1	1
CC	GO:0098791	Golgi apparatus subcompartment	5/591	284/15597	0.984449410728413	0.999993249660622	gene-arhgef38/gene-clip3/gene-clstn3/gene-LOC122883087/gene-rab32a	5	arhgef38/clip3/clstn3/LOC122883087/rab32a	5	gene-arhgef38/gene-clip3/gene-clstn3/gene-LOC122883087/gene-rab32a	0
CC	GO:1990904	ribonucleoprotein complex	3/591	211/15597	0.987805846541412	0.999993249660622	gene-LOC122888945/gene-LOC122881519/gene-rbms3	3	LOC122881519/LOC122888945/rbms3	3	gene-LOC122881519/gene-LOC122888945/gene-rbms3	0
CC	GO:0005929	cilium	3/591	233/15597	0.993840684743507	0.999993249660622	gene-odad3/gene-dnah12/gene-LOC122870458	3	dnah12/LOC122870458/odad3	2	gene-dnah12/gene-LOC122870458	1
CC	GO:0000151	ubiquitin ligase complex	1/591	138/15597	0.995274313274473	0.999993249660622	gene-cbx8a	1	cbx8a	0	-	1
CC	GO:0010008	endosome membrane	1/591	139/15597	0.99545497702082	0.999993249660622	gene-LOC122870595	1	LOC122870595	0	-	1
CC	GO:0034702	ion channel complex	1/591	160/15597	0.997996579373788	0.999993249660622	gene-LOC122883451	1	LOC122883451	0	-	1
CC	GO:1902495	transmembrane transporter complex	1/591	170/15597	0.998644226183246	0.999993249660622	gene-LOC122883451	1	LOC122883451	0	-	1
CC	GO:1990351	transporter complex	1/591	171/15597	0.998696165142584	0.999993249660622	gene-LOC122883451	1	LOC122883451	0	-	1
CC	GO:0031966	mitochondrial membrane	3/591	295/15597	0.999167454594441	0.999993249660622	gene-vdac3/gene-mfn1a/gene-LOC122888793	3	LOC122888793/mfn1a/vdac3	3	gene-LOC122888793/gene-mfn1a/gene-vdac3	0
CC	GO:0005694	chromosome	5/591	405/15597	0.99950442965256	0.999993249660622	gene-LOC122877917/gene-dpf1/gene-snai2/gene-wbp2/gene-cbx8a	5	cbx8a/dpf1/LOC122877917/snai2/wbp2	3	gene-dpf1/gene-LOC122877917/gene-wbp2	2
CC	GO:0005730	nucleolus	1/591	199/15597	0.999563728968612	0.999993249660622	gene-sapcd1	1	sapcd1	1	gene-sapcd1	0
CC	GO:0005740	mitochondrial envelope	3/591	332/15597	0.99975822700491	0.999993249660622	gene-vdac3/gene-mfn1a/gene-LOC122888793	3	LOC122888793/mfn1a/vdac3	3	gene-LOC122888793/gene-mfn1a/gene-vdac3	0
CC	GO:0000139	Golgi membrane	1/591	244/15597	0.999925223705122	0.999993249660622	gene-clstn3	1	clstn3	1	gene-clstn3	0
CC	GO:0140535	intracellular protein-containing complex	3/591	369/15597	0.999931512657608	0.999993249660622	gene-cbx8a/gene-ppp2r5b/gene-LOC122871413	3	cbx8a/LOC122871413/ppp2r5b	2	gene-LOC122871413/gene-ppp2r5b	1
CC	GO:1990234	transferase complex	2/591	314/15597	0.999935113249452	0.999993249660622	gene-LOC122873544/gene-cbx8a	2	cbx8a/LOC122873544	1	gene-LOC122873544	1
CC	GO:0031967	organelle envelope	3/591	418/15597	0.999987518859277	0.999993249660622	gene-vdac3/gene-mfn1a/gene-LOC122888793	3	LOC122888793/mfn1a/vdac3	3	gene-LOC122888793/gene-mfn1a/gene-vdac3	0
CC	GO:0031975	envelope	3/591	418/15597	0.999987518859277	0.999993249660622	gene-vdac3/gene-mfn1a/gene-LOC122888793	3	LOC122888793/mfn1a/vdac3	3	gene-LOC122888793/gene-mfn1a/gene-vdac3	0
CC	GO:0140513	nuclear protein-containing complex	4/591	490/15597	0.999993249660622	0.999993249660622	gene-znf703/gene-dpf1/gene-hdac9b/gene-cbx8a	4	cbx8a/dpf1/hdac9b/znf703	2	gene-dpf1/gene-hdac9b	2
MF	GO:0030546	signaling receptor activator activity	33/603	317/15230	4.04874696596971e-07	8.088060525965e-05	gene-fgf7/gene-adma/gene-pth4/gene-LOC122873767/gene-cxcl12b/gene-LOC122875530/gene-LOC122876711/gene-ccl44/gene-LOC122877465/gene-bmp16/gene-il15l/gene-apln/gene-LOC122880049/gene-LOC122880389/gene-il12ba/gene-insb/gene-osgin2/gene-vegfaa/gene-LOC122884604/gene-LOC122888056/gene-LOC122888753/gene-tgfb3/gene-LOC122865808/gene-bmp6/gene-prlh2/gene-gdf10b/gene-pyya/gene-gpha2/gene-pthlha/gene-ucn3l…	33	adm2a/adma/apln/bmp16/bmp6/ccl44/cxcl12b/fgf7/gdf10b/gpha2/il12ba/il15l/insb/LOC122865808/LOC122872036/LOC122873767/LOC122875530/LOC122876711/LOC122877465/LOC122880049/LOC122880389/LOC122884604/LOC122888056/LOC122888753/osgin2/prlh2/pth4/pthlha/pyya/tafa5a/tgfb3/ucn3l/vegfaa	20	gene-adm2a/gene-apln/gene-gpha2/gene-il12ba/gene-insb/gene-LOC122865808/gene-LOC122873767/gene-LOC122876711/gene-LOC122877465/gene-LOC122880049/gene-LOC122880389/gene-LOC122884604/gene-LOC122888056/gene-LOC122888753/gene-osgin2/gene-prlh2/gene-pth4/gene-pyya/gene-ucn3l/gene-vegfaa	13
MF	GO:0048018	receptor ligand activity	33/603	317/15230	4.04874696596971e-07	8.088060525965e-05	gene-fgf7/gene-adma/gene-pth4/gene-LOC122873767/gene-cxcl12b/gene-LOC122875530/gene-LOC122876711/gene-ccl44/gene-LOC122877465/gene-bmp16/gene-il15l/gene-apln/gene-LOC122880049/gene-LOC122880389/gene-il12ba/gene-insb/gene-osgin2/gene-vegfaa/gene-LOC122884604/gene-LOC122888056/gene-LOC122888753/gene-tgfb3/gene-LOC122865808/gene-bmp6/gene-prlh2/gene-gdf10b/gene-pyya/gene-gpha2/gene-pthlha/gene-ucn3l…	33	adm2a/adma/apln/bmp16/bmp6/ccl44/cxcl12b/fgf7/gdf10b/gpha2/il12ba/il15l/insb/LOC122865808/LOC122872036/LOC122873767/LOC122875530/LOC122876711/LOC122877465/LOC122880049/LOC122880389/LOC122884604/LOC122888056/LOC122888753/osgin2/prlh2/pth4/pthlha/pyya/tafa5a/tgfb3/ucn3l/vegfaa	20	gene-adm2a/gene-apln/gene-gpha2/gene-il12ba/gene-insb/gene-LOC122865808/gene-LOC122873767/gene-LOC122876711/gene-LOC122877465/gene-LOC122880049/gene-LOC122880389/gene-LOC122884604/gene-LOC122888056/gene-LOC122888753/gene-osgin2/gene-prlh2/gene-pth4/gene-pyya/gene-ucn3l/gene-vegfaa	13
MF	GO:0030545	receptor regulator activity	33/603	322/15230	5.79097412360263e-07	8.088060525965e-05	gene-fgf7/gene-adma/gene-pth4/gene-LOC122873767/gene-cxcl12b/gene-LOC122875530/gene-LOC122876711/gene-ccl44/gene-LOC122877465/gene-bmp16/gene-il15l/gene-apln/gene-LOC122880049/gene-LOC122880389/gene-il12ba/gene-insb/gene-osgin2/gene-vegfaa/gene-LOC122884604/gene-LOC122888056/gene-LOC122888753/gene-tgfb3/gene-LOC122865808/gene-bmp6/gene-prlh2/gene-gdf10b/gene-pyya/gene-gpha2/gene-pthlha/gene-ucn3l…	33	adm2a/adma/apln/bmp16/bmp6/ccl44/cxcl12b/fgf7/gdf10b/gpha2/il12ba/il15l/insb/LOC122865808/LOC122872036/LOC122873767/LOC122875530/LOC122876711/LOC122877465/LOC122880049/LOC122880389/LOC122884604/LOC122888056/LOC122888753/osgin2/prlh2/pth4/pthlha/pyya/tafa5a/tgfb3/ucn3l/vegfaa	20	gene-adm2a/gene-apln/gene-gpha2/gene-il12ba/gene-insb/gene-LOC122865808/gene-LOC122873767/gene-LOC122876711/gene-LOC122877465/gene-LOC122880049/gene-LOC122880389/gene-LOC122884604/gene-LOC122888056/gene-LOC122888753/gene-osgin2/gene-prlh2/gene-pth4/gene-pyya/gene-ucn3l/gene-vegfaa	13
MF	GO:0001664	G protein-coupled receptor binding	11/603	85/15230	0.000510347748918272	0.0533850148396943	gene-LOC122873767/gene-cxcl12b/gene-LOC122878347/gene-ccl44/gene-apln/gene-LOC122880389/gene-LOC122884604/gene-LOC122888056/gene-LOC122863926/gene-ucn3l/gene-tafa5a	11	apln/ccl44/cxcl12b/LOC122863926/LOC122873767/LOC122878347/LOC122880389/LOC122884604/LOC122888056/tafa5a/ucn3l	8	gene-apln/gene-LOC122863926/gene-LOC122873767/gene-LOC122878347/gene-LOC122880389/gene-LOC122884604/gene-LOC122888056/gene-ucn3l	3
MF	GO:0008083	growth factor activity	14/603	130/15230	0.000637052683051244	0.0533850148396943	gene-fgf7/gene-cxcl12b/gene-LOC122875530/gene-LOC122877465/gene-bmp16/gene-LOC122880049/gene-osgin2/gene-vegfaa/gene-LOC122888753/gene-tgfb3/gene-LOC122865808/gene-bmp6/gene-gdf10b/gene-LOC122872036	14	bmp16/bmp6/cxcl12b/fgf7/gdf10b/LOC122865808/LOC122872036/LOC122875530/LOC122877465/LOC122880049/LOC122888753/osgin2/tgfb3/vegfaa	6	gene-LOC122865808/gene-LOC122877465/gene-LOC122880049/gene-LOC122888753/gene-osgin2/gene-vegfaa	8
MF	GO:0005125	cytokine activity	10/603	84/15230	0.00173572890419935	0.121211735143255	gene-LOC122873767/gene-cxcl12b/gene-LOC122876711/gene-ccl44/gene-il15l/gene-LOC122880389/gene-il12ba/gene-LOC122884604/gene-LOC122888056/gene-tafa5a	10	ccl44/cxcl12b/il12ba/il15l/LOC122873767/LOC122876711/LOC122880389/LOC122884604/LOC122888056/tafa5a	6	gene-il12ba/gene-LOC122873767/gene-LOC122876711/gene-LOC122880389/gene-LOC122884604/gene-LOC122888056	4
MF	GO:0004953	icosanoid receptor activity	4/603	16/15230	0.00302668134060701	0.181168497387763	gene-LOC122878154/gene-tbxa2r/gene-ptger3/gene-ltb4r	4	LOC122878154/ltb4r/ptger3/tbxa2r	2	gene-LOC122878154/gene-ltb4r	2
MF	GO:0008009	chemokine activity	6/603	39/15230	0.00402345562871395	0.194938082289349	gene-LOC122873767/gene-cxcl12b/gene-ccl44/gene-LOC122880389/gene-LOC122884604/gene-LOC122888056	6	ccl44/cxcl12b/LOC122873767/LOC122880389/LOC122884604/LOC122888056	4	gene-LOC122873767/gene-LOC122880389/gene-LOC122884604/gene-LOC122888056	2
MF	GO:0042379	chemokine receptor binding	6/603	40/15230	0.0045783131632786	0.194938082289349	gene-LOC122873767/gene-cxcl12b/gene-ccl44/gene-LOC122880389/gene-LOC122884604/gene-LOC122888056	6	ccl44/cxcl12b/LOC122873767/LOC122880389/LOC122884604/LOC122888056	4	gene-LOC122873767/gene-LOC122880389/gene-LOC122884604/gene-LOC122888056	2
MF	GO:0005126	cytokine receptor binding	10/603	96/15230	0.00465246019783649	0.194938082289349	gene-LOC122873767/gene-cxcl12b/gene-LOC122876711/gene-ccl44/gene-il15l/gene-LOC122880389/gene-LOC122884604/gene-LOC122888056/gene-tgfb3/gene-LOC122865536	10	ccl44/cxcl12b/il15l/LOC122865536/LOC122873767/LOC122876711/LOC122880389/LOC122884604/LOC122888056/tgfb3	6	gene-LOC122865536/gene-LOC122873767/gene-LOC122876711/gene-LOC122880389/gene-LOC122884604/gene-LOC122888056	4
MF	GO:0005179	hormone activity	11/603	117/15230	0.00668187191169552	0.254518575545493	gene-adma/gene-pth4/gene-apln/gene-insb/gene-prlh2/gene-pyya/gene-gpha2/gene-pthlha/gene-ucn3l/gene-adm2a/gene-LOC122872036	11	adm2a/adma/apln/gpha2/insb/LOC122872036/prlh2/pth4/pthlha/pyya/ucn3l	8	gene-adm2a/gene-apln/gene-gpha2/gene-insb/gene-prlh2/gene-pth4/gene-pyya/gene-ucn3l	3
MF	GO:0003779	actin binding	25/603	377/15230	0.00838271219184266	0.279985683937858	gene-pstpip1b/gene-LOC122885147/gene-LOC122872091/gene-LOC122873669/gene-LOC122870658/gene-parvb/gene-tpm1/gene-mtss1la/gene-LOC122880325/gene-wipf1b/gene-myo16/gene-tpm4b/gene-xirp1/gene-adss1/gene-cap2/gene-enc1/gene-svila/gene-LOC122867469/gene-LOC122867164/gene-myo15b/gene-LOC122868750/gene-mrtfbb/gene-LOC122871423/gene-eps8a/gene-xirp2a	25	adss1/cap2/enc1/eps8a/LOC122867164/LOC122867469/LOC122868750/LOC122870658/LOC122871423/LOC122872091/LOC122873669/LOC122880325/LOC122885147/mrtfbb/mtss1la/myo15b/myo16/parvb/pstpip1b/svila/tpm1/tpm4b/wipf1b/xirp1/xirp2a	15	gene-adss1/gene-eps8a/gene-LOC122868750/gene-LOC122870658/gene-LOC122871423/gene-LOC122880325/gene-LOC122885147/gene-myo15b/gene-myo16/gene-parvb/gene-pstpip1b/gene-svila/gene-wipf1b/gene-xirp1/gene-xirp2a	10
MF	GO:0015293	symporter activity	10/603	105/15230	0.00868690666155647	0.279985683937858	gene-slc12a5a/gene-slc6a15/gene-slc34a1b/gene-LOC122880951/gene-slc1a4/gene-slc6a7/gene-LOC122889001/gene-mfsd2b/gene-slc16a3a/gene-LOC122871427	10	LOC122871427/LOC122880951/LOC122889001/mfsd2b/slc12a5a/slc16a3a/slc1a4/slc34a1b/slc6a15/slc6a7	9	gene-LOC122871427/gene-LOC122880951/gene-LOC122889001/gene-slc12a5a/gene-slc16a3a/gene-slc1a4/gene-slc34a1b/gene-slc6a15/gene-slc6a7	1
MF	GO:0004954	prostanoid receptor activity	3/603	12/15230	0.0103968407582215	0.311162591263914	gene-LOC122878154/gene-tbxa2r/gene-ptger3	3	LOC122878154/ptger3/tbxa2r	1	gene-LOC122878154	2
MF	GO:0042826	histone deacetylase binding	3/603	14/15230	0.016219442190655	0.427156077483419	gene-znf703/gene-LOC122877917/gene-prdm1b	3	LOC122877917/prdm1b/znf703	2	gene-LOC122877917/gene-prdm1b	1
MF	GO:0030215	semaphorin receptor binding	5/603	38/15230	0.01631144925951	0.427156077483419	gene-sema4ba/gene-sema3e/gene-sema6bb/gene-si:ch211-129c21.1/gene-LOC122883146	5	LOC122883146/sema3e/sema4ba/sema6bb/si:ch211-129c21.1	3	gene-sema3e/gene-sema4ba/gene-si:ch211-129c21.1	2
MF	GO:0003950	NAD+ ADP-ribosyltransferase activity	4/603	28/15230	0.0234188266356857	0.533179819484826	gene-parp12a/gene-LOC122876199/gene-si:ch73-252i11.1/Novel.138	4	LOC122876199/parp12a/si:ch73-252i11.1/Novel.138	4	gene-LOC122876199/gene-parp12a/gene-si:ch73-252i11.1/Novel.138	0
MF	GO:0001653	peptide receptor activity	10/603	123/15230	0.0241776051795028	0.533179819484826	gene-tacr2/gene-npffr1l2/gene-mlnr/gene-LOC122881975/gene-LOC122881976/gene-oprm1/gene-LOC122885641/gene-p2ry8/gene-LOC122863516/gene-LOC122871233	10	LOC122863516/LOC122871233/LOC122881975/LOC122881976/LOC122885641/mlnr/npffr1l2/oprm1/p2ry8/tacr2	8	gene-LOC122881975/gene-LOC122881976/gene-LOC122885641/gene-mlnr/gene-npffr1l2/gene-oprm1/gene-p2ry8/gene-tacr2	2
MF	GO:0008528	G protein-coupled peptide receptor activity	10/603	123/15230	0.0241776051795028	0.533179819484826	gene-tacr2/gene-npffr1l2/gene-mlnr/gene-LOC122881975/gene-LOC122881976/gene-oprm1/gene-LOC122885641/gene-p2ry8/gene-LOC122863516/gene-LOC122871233	10	LOC122863516/LOC122871233/LOC122881975/LOC122881976/LOC122885641/mlnr/npffr1l2/oprm1/p2ry8/tacr2	8	gene-LOC122881975/gene-LOC122881976/gene-LOC122885641/gene-mlnr/gene-npffr1l2/gene-oprm1/gene-p2ry8/gene-tacr2	2
MF	GO:0140326	ATPase-coupled intramembrane lipid transporter activity	3/603	17/15230	0.027754769863488	0.580936702591249	gene-atp8b4/gene-LOC122876099/gene-LOC122883087	3	atp8b4/LOC122876099/LOC122883087	3	gene-atp8b4/gene-LOC122876099/gene-LOC122883087	0
MF	GO:0022804	active transmembrane transporter activity	16/603	243/15230	0.0325984993197378	0.580936702591249	gene-slc12a5a/gene-abcg2d/gene-slc6a15/gene-slc47a3/gene-slc8a2b/gene-slc34a1b/gene-LOC122880951/gene-slc1a4/gene-slc6a7/gene-LOC122889001/gene-slc8a3/gene-mfsd2b/gene-tap2a/gene-slc16a3a/gene-LOC122870371/gene-LOC122871427	16	abcg2d/LOC122870371/LOC122871427/LOC122880951/LOC122889001/mfsd2b/slc12a5a/slc16a3a/slc1a4/slc34a1b/slc47a3/slc6a15/slc6a7/slc8a2b/slc8a3/tap2a	15	gene-abcg2d/gene-LOC122870371/gene-LOC122871427/gene-LOC122880951/gene-LOC122889001/gene-slc12a5a/gene-slc16a3a/gene-slc1a4/gene-slc34a1b/gene-slc47a3/gene-slc6a15/gene-slc6a7/gene-slc8a2b/gene-slc8a3/gene-tap2a	1
MF	GO:0015291	secondary active transmembrane transporter activity	13/603	185/15230	0.0326466915304456	0.580936702591249	gene-slc12a5a/gene-slc6a15/gene-slc47a3/gene-slc8a2b/gene-slc34a1b/gene-LOC122880951/gene-slc1a4/gene-slc6a7/gene-LOC122889001/gene-slc8a3/gene-mfsd2b/gene-slc16a3a/gene-LOC122871427	13	LOC122871427/LOC122880951/LOC122889001/mfsd2b/slc12a5a/slc16a3a/slc1a4/slc34a1b/slc47a3/slc6a15/slc6a7/slc8a2b/slc8a3	12	gene-LOC122871427/gene-LOC122880951/gene-LOC122889001/gene-slc12a5a/gene-slc16a3a/gene-slc1a4/gene-slc34a1b/gene-slc47a3/gene-slc6a15/gene-slc6a7/gene-slc8a2b/gene-slc8a3	1
MF	GO:0008081	phosphoric diester hydrolase activity	8/603	98/15230	0.0404003996984737	0.580936702591249	gene-LOC122872164/gene-LOC122874950/gene-pde4ba/gene-LOC122881246/gene-smpdl3b/gene-pde10a/gene-plcd3a/gene-LOC122871826	8	LOC122871826/LOC122872164/LOC122874950/LOC122881246/pde10a/pde4ba/plcd3a/smpdl3b	2	gene-LOC122872164/gene-plcd3a	6
MF	GO:0070851	growth factor receptor binding	5/603	48/15230	0.0404238583045051	0.580936702591249	gene-fgf7/gene-LOC122876711/gene-LOC122877465/gene-LOC122880049/gene-LOC122888753	5	fgf7/LOC122876711/LOC122877465/LOC122880049/LOC122888753	4	gene-LOC122876711/gene-LOC122877465/gene-LOC122880049/gene-LOC122888753	1
MF	GO:0140303	intramembrane lipid transporter activity	3/603	20/15230	0.0426466277864387	0.580936702591249	gene-atp8b4/gene-LOC122876099/gene-LOC122883087	3	atp8b4/LOC122876099/LOC122883087	3	gene-atp8b4/gene-LOC122876099/gene-LOC122883087	0
MF	GO:0004896	cytokine receptor activity	6/603	65/15230	0.0432552122980948	0.580936702591249	gene-lepr/gene-il12ba/gene-LOC122881975/gene-LOC122881976/gene-LOC122885641/gene-il15ra	6	il12ba/il15ra/lepr/LOC122881975/LOC122881976/LOC122885641	6	gene-il12ba/gene-il15ra/gene-lepr/gene-LOC122881975/gene-LOC122881976/gene-LOC122885641	0
MF	GO:0005104	fibroblast growth factor receptor binding	3/603	21/15230	0.0483362708511249	0.580936702591249	gene-fgf7/gene-LOC122880049/gene-LOC122888753	3	fgf7/LOC122880049/LOC122888753	2	gene-LOC122880049/gene-LOC122888753	1
MF	GO:0005496	steroid binding	3/603	21/15230	0.0483362708511249	0.580936702591249	gene-pgr/gene-paqr8/gene-LOC122863260	3	LOC122863260/paqr8/pgr	2	gene-LOC122863260/gene-paqr8	1
MF	GO:0004114	3',5'-cyclic-nucleotide phosphodiesterase activity	4/603	36/15230	0.0527030949668472	0.580936702591249	gene-LOC122872164/gene-LOC122874950/gene-pde4ba/gene-pde10a	4	LOC122872164/LOC122874950/pde10a/pde4ba	1	gene-LOC122872164	3
MF	GO:0003774	motor activity	10/603	141/15230	0.0535829459566561	0.580936702591249	gene-LOC122870658/gene-kif21a/gene-dnah12/gene-myo16/gene-kif1ab/gene-kif26bb/gene-LOC122863271/gene-myo15b/gene-LOC122868750/gene-LOC122870458	10	dnah12/kif1ab/kif21a/kif26bb/LOC122863271/LOC122868750/LOC122870458/LOC122870658/myo15b/myo16	10	gene-dnah12/gene-kif1ab/gene-kif21a/gene-kif26bb/gene-LOC122863271/gene-LOC122868750/gene-LOC122870458/gene-LOC122870658/gene-myo15b/gene-myo16	0
MF	GO:0005539	glycosaminoglycan binding	7/603	86/15230	0.0539390587365739	0.580936702591249	gene-cd44b/gene-ndnf/gene-pglyrp5/gene-vegfaa/gene-tnfaip6/gene-LOC122888753/gene-stab2	7	cd44b/LOC122888753/ndnf/pglyrp5/stab2/tnfaip6/vegfaa	4	gene-LOC122888753/gene-stab2/gene-tnfaip6/gene-vegfaa	3
MF	GO:0140375	immune receptor activity	6/603	69/15230	0.0551364024382098	0.580936702591249	gene-lepr/gene-il12ba/gene-LOC122881975/gene-LOC122881976/gene-LOC122885641/gene-il15ra	6	il12ba/il15ra/lepr/LOC122881975/LOC122881976/LOC122885641	6	gene-il12ba/gene-il15ra/gene-lepr/gene-LOC122881975/gene-LOC122881976/gene-LOC122885641	0
MF	GO:0019199	transmembrane receptor protein kinase activity	10/603	142/15230	0.055704250054379	0.580936702591249	gene-bmpr1ba/gene-kdrl/gene-csf1ra/gene-epha2b/gene-fgfr4/gene-fgfr3/gene-LOC122866896/gene-si:ch73-40a2.1/gene-LOC122872371/Novel.146	10	bmpr1ba/csf1ra/epha2b/fgfr3/fgfr4/kdrl/LOC122866896/LOC122872371/si:ch73-40a2.1/Novel.146	2	gene-csf1ra/gene-LOC122866896	8
MF	GO:0042578	phosphoric ester hydrolase activity	23/603	408/15230	0.0567870829101291	0.580936702591249	gene-eya2/gene-LOC122872164/gene-inpp4b/gene-dusp5/gene-LOC122874950/gene-fbp2/gene-plppr3b/gene-pde4ba/gene-plpp3/gene-LOC122881246/gene-smpdl3b/gene-ptpn11b/gene-pde10a/gene-ptprna/gene-lpin1b/gene-LOC122865803/gene-LOC122866917/gene-plcd3a/gene-LOC122868405/gene-ptpro/gene-pfkfb3/gene-LOC122871826/gene-LOC122871755	23	dusp5/eya2/fbp2/inpp4b/LOC122865803/LOC122866917/LOC122868405/LOC122871755/LOC122871826/LOC122872164/LOC122874950/LOC122881246/lpin1b/pde10a/pde4ba/pfkfb3/plcd3a/plpp3/plppr3b/ptpn11b/ptprna/ptpro/smpdl3b	13	gene-dusp5/gene-fbp2/gene-LOC122865803/gene-LOC122866917/gene-LOC122868405/gene-LOC122871755/gene-LOC122872164/gene-lpin1b/gene-pfkfb3/gene-plcd3a/gene-plppr3b/gene-ptpn11b/gene-ptprna	10
MF	GO:0004955	prostaglandin receptor activity	2/603	10/15230	0.0570455992782601	0.580936702591249	gene-LOC122878154/gene-ptger3	2	LOC122878154/ptger3	1	gene-LOC122878154	1
MF	GO:0004112	cyclic-nucleotide phosphodiesterase activity	4/603	37/15230	0.0573182147544258	0.580936702591249	gene-LOC122872164/gene-LOC122874950/gene-pde4ba/gene-pde10a	4	LOC122872164/LOC122874950/pde10a/pde4ba	1	gene-LOC122872164	3
MF	GO:0004879	nuclear receptor activity	4/603	37/15230	0.0573182147544258	0.580936702591249	gene-rorb/gene-nr4a3/gene-nr1d4a/gene-LOC122864108	4	LOC122864108/nr1d4a/nr4a3/rorb	2	gene-LOC122864108/gene-nr1d4a	2
MF	GO:0098531	ligand-activated transcription factor activity	4/603	37/15230	0.0573182147544258	0.580936702591249	gene-rorb/gene-nr4a3/gene-nr1d4a/gene-LOC122864108	4	LOC122864108/nr1d4a/nr4a3/rorb	2	gene-LOC122864108/gene-nr1d4a	2
MF	GO:0005003	ephrin receptor activity	3/603	23/15230	0.0607591069175542	0.580936702591249	gene-epha2b/gene-si:ch73-40a2.1/Novel.146	3	epha2b/si:ch73-40a2.1/Novel.146	0	-	3
MF	GO:0016810	hydrolase activity, acting on carbon-nitrogen (but not peptide) bonds	8/603	107/15230	0.061887342192393	0.580936702591249	gene-ampd3a/gene-padi2/gene-cdab/gene-gda/gene-ddah1/gene-pglyrp5/gene-hdac9b/gene-arg2	8	ampd3a/arg2/cdab/ddah1/gda/hdac9b/padi2/pglyrp5	5	gene-arg2/gene-cdab/gene-gda/gene-hdac9b/gene-padi2	3
MF	GO:0099094	ligand-gated cation channel activity	7/603	90/15230	0.0657433057578204	0.580936702591249	gene-chrna3/gene-ryr1b/gene-LOC122883451/gene-kcnj15/gene-kcnj1b/gene-kcnj2a/gene-ryr2a	7	chrna3/kcnj15/kcnj1b/kcnj2a/LOC122883451/ryr1b/ryr2a	3	gene-kcnj2a/gene-ryr1b/gene-ryr2a	4
MF	GO:0001637	G protein-coupled chemoattractant receptor activity	3/603	24/15230	0.0674735177566492	0.580936702591249	gene-LOC122881975/gene-LOC122881976/gene-LOC122885641	3	LOC122881975/LOC122881976/LOC122885641	3	gene-LOC122881975/gene-LOC122881976/gene-LOC122885641	0
MF	GO:0004950	chemokine receptor activity	3/603	24/15230	0.0674735177566492	0.580936702591249	gene-LOC122881975/gene-LOC122881976/gene-LOC122885641	3	LOC122881975/LOC122881976/LOC122885641	3	gene-LOC122881975/gene-LOC122881976/gene-LOC122885641	0
MF	GO:0005242	inward rectifier potassium channel activity	3/603	24/15230	0.0674735177566492	0.580936702591249	gene-kcnj15/gene-kcnj1b/gene-kcnj2a	3	kcnj15/kcnj1b/kcnj2a	1	gene-kcnj2a	2
MF	GO:0035591	signaling adaptor activity	3/603	24/15230	0.0674735177566492	0.580936702591249	gene-LOC122883326/gene-LOC122869123/gene-eps8a	3	eps8a/LOC122869123/LOC122883326	3	gene-eps8a/gene-LOC122869123/gene-LOC122883326	0
MF	GO:0008443	phosphofructokinase activity	2/603	11/15230	0.0679377050763035	0.580936702591249	gene-LOC122886641/gene-pfkfb3	2	LOC122886641/pfkfb3	2	gene-LOC122886641/gene-pfkfb3	0
MF	GO:0015278	calcium-release channel activity	2/603	11/15230	0.0679377050763035	0.580936702591249	gene-ryr1b/gene-ryr2a	2	ryr1b/ryr2a	2	gene-ryr1b/gene-ryr2a	0
MF	GO:0070325	lipoprotein particle receptor binding	2/603	11/15230	0.0679377050763035	0.580936702591249	gene-reln/gene-si:dkeyp-118h9.7	2	reln/si:dkeyp-118h9.7	1	gene-si:dkeyp-118h9.7	1
MF	GO:0099604	ligand-gated calcium channel activity	2/603	11/15230	0.0679377050763035	0.580936702591249	gene-ryr1b/gene-ryr2a	2	ryr1b/ryr2a	2	gene-ryr1b/gene-ryr2a	0
MF	GO:0008195	phosphatidate phosphatase activity	2/603	12/15230	0.0794458779399199	0.619416052243254	gene-lpin1b/gene-LOC122866917	2	LOC122866917/lpin1b	2	gene-LOC122866917/gene-lpin1b	0
MF	GO:0019203	carbohydrate phosphatase activity	2/603	12/15230	0.0794458779399199	0.619416052243254	gene-fbp2/gene-pfkfb3	2	fbp2/pfkfb3	2	gene-fbp2/gene-pfkfb3	0
MF	GO:0050308	sugar-phosphatase activity	2/603	12/15230	0.0794458779399199	0.619416052243254	gene-fbp2/gene-pfkfb3	2	fbp2/pfkfb3	2	gene-fbp2/gene-pfkfb3	0
MF	GO:1990939	ATP-dependent microtubule motor activity	6/603	76/15230	0.080232848192668	0.619416052243254	gene-kif21a/gene-dnah12/gene-kif1ab/gene-kif26bb/gene-LOC122863271/gene-LOC122870458	6	dnah12/kif1ab/kif21a/kif26bb/LOC122863271/LOC122870458	6	gene-dnah12/gene-kif1ab/gene-kif21a/gene-kif26bb/gene-LOC122863271/gene-LOC122870458	0
MF	GO:0005540	hyaluronic acid binding	3/603	26/15230	0.0818551231366968	0.619416052243254	gene-cd44b/gene-tnfaip6/gene-stab2	3	cd44b/stab2/tnfaip6	2	gene-stab2/gene-tnfaip6	1
MF	GO:0051015	actin filament binding	8/603	114/15230	0.0827616656851361	0.619416052243254	gene-pstpip1b/gene-LOC122872091/gene-LOC122873669/gene-LOC122870658/gene-LOC122880325/gene-svila/gene-LOC122867164/gene-LOC122868750	8	LOC122867164/LOC122868750/LOC122870658/LOC122872091/LOC122873669/LOC122880325/pstpip1b/svila	5	gene-LOC122868750/gene-LOC122870658/gene-LOC122880325/gene-pstpip1b/gene-svila	3
MF	GO:0003777	microtubule motor activity	6/603	77/15230	0.0842642362240227	0.619416052243254	gene-kif21a/gene-dnah12/gene-kif1ab/gene-kif26bb/gene-LOC122863271/gene-LOC122870458	6	dnah12/kif1ab/kif21a/kif26bb/LOC122863271/LOC122870458	6	gene-dnah12/gene-kif1ab/gene-kif21a/gene-kif26bb/gene-LOC122863271/gene-LOC122870458	0
MF	GO:0030674	protein-macromolecule adaptor activity	6/603	77/15230	0.0842642362240227	0.619416052243254	gene-LOC122873669/gene-tsnare1/gene-LOC122883326/gene-LOC122869123/gene-eps8a/gene-LOC122871189	6	eps8a/LOC122869123/LOC122871189/LOC122873669/LOC122883326/tsnare1	5	gene-eps8a/gene-LOC122869123/gene-LOC122871189/gene-LOC122883326/gene-tsnare1	1
MF	GO:0019239	deaminase activity	3/603	27/15230	0.0894990436325055	0.628530513348218	gene-ampd3a/gene-cdab/gene-gda	3	ampd3a/cdab/gda	2	gene-cdab/gene-gda	1
MF	GO:0004709	MAP kinase kinase kinase activity	2/603	13/15230	0.0915044422774255	0.628530513348218	gene-map3k21/gene-map3k5	2	map3k21/map3k5	1	gene-map3k21	1
MF	GO:0005432	calcium:sodium antiporter activity	2/603	13/15230	0.0915044422774255	0.628530513348218	gene-slc8a2b/gene-slc8a3	2	slc8a2b/slc8a3	2	gene-slc8a2b/gene-slc8a3	0
MF	GO:0015368	calcium:cation antiporter activity	2/603	13/15230	0.0915044422774255	0.628530513348218	gene-slc8a2b/gene-slc8a3	2	slc8a2b/slc8a3	2	gene-slc8a2b/gene-slc8a3	0
MF	GO:0005507	copper ion binding	3/603	29/15230	0.105631221927531	0.713741296613852	gene-f5/gene-loxl3b/gene-dbh	3	dbh/f5/loxl3b	0	-	3
MF	GO:0004714	transmembrane receptor protein tyrosine kinase activity	8/603	121/15230	0.107316710469386	0.713741296613852	gene-kdrl/gene-csf1ra/gene-epha2b/gene-fgfr4/gene-fgfr3/gene-LOC122866896/gene-si:ch73-40a2.1/Novel.146	8	csf1ra/epha2b/fgfr3/fgfr4/kdrl/LOC122866896/si:ch73-40a2.1/Novel.146	2	gene-csf1ra/gene-LOC122866896	6
MF	GO:0005516	calmodulin binding	6/603	83/15230	0.110732981955571	0.72495499124038	gene-camk2d2/gene-ryr1b/gene-slc8a2b/gene-kcnn3/gene-slc8a3/gene-ryr2a	6	camk2d2/kcnn3/ryr1b/ryr2a/slc8a2b/slc8a3	6	gene-camk2d2/gene-kcnn3/gene-ryr1b/gene-ryr2a/gene-slc8a2b/gene-slc8a3	0
MF	GO:0000287	magnesium ion binding	7/603	103/15230	0.114018293227083	0.734979459417657	gene-dut/gene-atp8b4/gene-LOC122876099/gene-LOC122883087/gene-LOC122882574/gene-adss1/gene-LOC122871826	7	adss1/atp8b4/dut/LOC122871826/LOC122876099/LOC122882574/LOC122883087	5	gene-adss1/gene-atp8b4/gene-LOC122876099/gene-LOC122882574/gene-LOC122883087	2
MF	GO:0008017	microtubule binding	10/603	164/15230	0.116508502371817	0.739652462027138	gene-map1aa/gene-LOC122875409/gene-kif21a/gene-mtus2b/gene-fmn2a/gene-kif1ab/gene-LOC122861414/gene-kif26bb/gene-fmn1/gene-LOC122863271	10	fmn1/fmn2a/kif1ab/kif21a/kif26bb/LOC122861414/LOC122863271/LOC122875409/map1aa/mtus2b	9	gene-fmn1/gene-kif1ab/gene-kif21a/gene-kif26bb/gene-LOC122861414/gene-LOC122863271/gene-LOC122875409/gene-map1aa/gene-mtus2b	1
MF	GO:0004222	metalloendopeptidase activity	8/603	124/15230	0.118945021521164	0.743850209214446	gene-adamts13/gene-adamts10/gene-LOC122877565/gene-LOC122879137/gene-mmp28/gene-mmp9/gene-mmp16b/gene-LOC122872158	8	adamts10/adamts13/LOC122872158/LOC122877565/LOC122879137/mmp16b/mmp28/mmp9	5	gene-adamts13/gene-LOC122877565/gene-LOC122879137/gene-mmp16b/gene-mmp9	3
MF	GO:0004713	protein tyrosine kinase activity	8/603	126/15230	0.127055205309339	0.780463248867918	gene-kdrl/gene-csf1ra/gene-epha2b/gene-fgfr4/gene-fgfr3/gene-LOC122866896/gene-si:ch73-40a2.1/Novel.146	8	csf1ra/epha2b/fgfr3/fgfr4/kdrl/LOC122866896/si:ch73-40a2.1/Novel.146	2	gene-csf1ra/gene-LOC122866896	6
MF	GO:0016641	oxidoreductase activity, acting on the CH-NH2 group of donors, oxygen as acceptor	2/603	16/15230	0.130387654942134	0.780463248867918	gene-LOC122876127/gene-loxl3b	2	LOC122876127/loxl3b	1	gene-LOC122876127	1
MF	GO:0034593	phosphatidylinositol bisphosphate phosphatase activity	2/603	16/15230	0.130387654942134	0.780463248867918	gene-inpp4b/gene-LOC122871755	2	inpp4b/LOC122871755	1	gene-LOC122871755	1
MF	GO:0016814	hydrolase activity, acting on carbon-nitrogen (but not peptide) bonds, in cyclic amidines	3/603	33/15230	0.140906297972559	0.831545617612707	gene-ampd3a/gene-cdab/gene-gda	3	ampd3a/cdab/gda	2	gene-cdab/gene-gda	1
MF	GO:0005520	insulin-like growth factor binding	3/603	34/15230	0.150273968238761	0.874511009611681	gene-LOC122873543/gene-ccn1/gene-ccn2a	3	ccn1/ccn2a/LOC122873543	1	gene-LOC122873543	2
MF	GO:0008028	monocarboxylic acid transmembrane transporter activity	2/603	18/15230	0.158037299147912	0.88010360135315	gene-slc16a3a/gene-LOC122871427	2	LOC122871427/slc16a3a	2	gene-LOC122871427/gene-slc16a3a	0
MF	GO:0071949	FAD binding	2/603	18/15230	0.158037299147912	0.88010360135315	gene-LOC122876127/gene-LOC122871423	2	LOC122871423/LOC122876127	2	gene-LOC122871423/gene-LOC122876127	0
MF	GO:0016887	ATPase activity	22/603	444/15230	0.165459594447937	0.88010360135315	gene-LOC122882934/gene-LOC122883931/gene-abcg2d/gene-atp8b4/gene-kif21a/gene-LOC122876099/gene-hspa1b/gene-dnah12/gene-LOC122883087/gene-ifih1/gene-kif1ab/gene-kif26bb/gene-LOC122863271/gene-tap2a/gene-rnf213b/gene-LOC122869030/gene-LOC122869034/gene-dhx58/gene-LOC122870458/gene-LOC122870371/Novel.29/Novel.132	22	abcg2d/atp8b4/dhx58/dnah12/hspa1b/ifih1/kif1ab/kif21a/kif26bb/LOC122863271/LOC122869030/LOC122869034/LOC122870371/LOC122870458/LOC122876099/LOC122882934/LOC122883087/LOC122883931/rnf213b/tap2a/Novel.132/Novel.29	18	gene-abcg2d/gene-atp8b4/gene-dhx58/gene-dnah12/gene-ifih1/gene-kif1ab/gene-kif21a/gene-kif26bb/gene-LOC122863271/gene-LOC122870371/gene-LOC122870458/gene-LOC122876099/gene-LOC122882934/gene-LOC122883087/gene-LOC122883931/gene-rnf213b/gene-tap2a/Novel.29	4
MF	GO:0030695	GTPase regulator activity	20/603	400/15230	0.169281422460767	0.88010360135315	gene-LOC122869858/gene-arhgef38/gene-rgs12b/gene-arhgap25/gene-sgsm1a/gene-arhgef37/gene-rgl2/gene-LOC122883716/gene-rasgrp3/gene-arfgef3/gene-asap1a/gene-arhgap24/gene-LOC122865539/gene-spata13/gene-si:dkey-191m6.4/gene-rundc1/gene-tbc1d14/gene-LOC122869789/gene-tbc1d30/gene-LOC122871413	20	arfgef3/arhgap24/arhgap25/arhgef37/arhgef38/asap1a/LOC122865539/LOC122869789/LOC122869858/LOC122871413/LOC122883716/rasgrp3/rgl2/rgs12b/rundc1/sgsm1a/si:dkey-191m6.4/spata13/tbc1d14/tbc1d30	17	gene-arfgef3/gene-arhgap25/gene-arhgef37/gene-arhgef38/gene-asap1a/gene-LOC122865539/gene-LOC122869789/gene-LOC122869858/gene-LOC122871413/gene-rasgrp3/gene-rgl2/gene-rundc1/gene-sgsm1a/gene-si:dkey-191m6.4/gene-spata13/gene-tbc1d14/gene-tbc1d30	3
MF	GO:0003707	steroid hormone receptor activity	2/603	19/15230	0.172239845610879	0.88010360135315	gene-pgr/gene-LOC122863260	2	LOC122863260/pgr	1	gene-LOC122863260	1
MF	GO:0004707	MAP kinase activity	2/603	19/15230	0.172239845610879	0.88010360135315	gene-mapk14b/gene-LOC122871339	2	LOC122871339/mapk14b	1	gene-mapk14b	1
MF	GO:0008013	beta-catenin binding	2/603	19/15230	0.172239845610879	0.88010360135315	gene-lef1/gene-LOC122877917	2	lef1/LOC122877917	2	gene-lef1/gene-LOC122877917	0
MF	GO:0008569	ATP-dependent microtubule motor activity, minus-end-directed	2/603	19/15230	0.172239845610879	0.88010360135315	gene-dnah12/gene-LOC122870458	2	dnah12/LOC122870458	2	gene-dnah12/gene-LOC122870458	0
MF	GO:0016638	oxidoreductase activity, acting on the CH-NH2 group of donors	2/603	19/15230	0.172239845610879	0.88010360135315	gene-LOC122876127/gene-loxl3b	2	LOC122876127/loxl3b	1	gene-LOC122876127	1
MF	GO:0030145	manganese ion binding	2/603	19/15230	0.172239845610879	0.88010360135315	gene-LOC122865803/gene-LOC122871826	2	LOC122865803/LOC122871826	1	gene-LOC122865803	1
MF	GO:0008234	cysteine-type peptidase activity	6/603	95/15230	0.174476791732743	0.880792478747221	gene-zgc:171566/gene-scrn2/gene-ctsh/gene-LOC122876757/gene-LOC122881737/gene-LOC122869437	6	ctsh/LOC122869437/LOC122876757/LOC122881737/scrn2/zgc:171566	5	gene-ctsh/gene-LOC122869437/gene-LOC122876757/gene-scrn2/gene-zgc:171566	1
MF	GO:0015085	calcium ion transmembrane transporter activity	6/603	96/15230	0.180364959448887	0.899677595346234	gene-trpm6/gene-ryr1b/gene-slc8a2b/gene-slc8a3/gene-atp2a1l/gene-ryr2a	6	atp2a1l/ryr1b/ryr2a/slc8a2b/slc8a3/trpm6	5	gene-atp2a1l/gene-ryr1b/gene-ryr2a/gene-slc8a2b/gene-slc8a3	1
MF	GO:0005217	intracellular ligand-gated ion channel activity	2/603	20/15230	0.186639092035817	0.909323018174504	gene-ryr1b/gene-ryr2a	2	ryr1b/ryr2a	2	gene-ryr1b/gene-ryr2a	0
MF	GO:0042577	lipid phosphatase activity	2/603	20/15230	0.186639092035817	0.909323018174504	gene-plppr3b/gene-plpp3	2	plpp3/plppr3b	1	gene-plppr3b	1
MF	GO:0008237	metallopeptidase activity	11/603	205/15230	0.190579695654001	0.917849338839382	gene-LOC122873417/gene-adamts13/gene-adamts10/gene-LOC122877565/gene-LOC122879137/gene-mmp28/gene-mmp9/gene-mmp16b/gene-cpxm1a/gene-cpxm2/gene-LOC122872158	11	adamts10/adamts13/cpxm1a/cpxm2/LOC122872158/LOC122873417/LOC122877565/LOC122879137/mmp16b/mmp28/mmp9	8	gene-adamts13/gene-cpxm1a/gene-cpxm2/gene-LOC122873417/gene-LOC122877565/gene-LOC122879137/gene-mmp16b/gene-mmp9	3
MF	GO:0060090	molecular adaptor activity	6/603	99/15230	0.198490781189115	0.935554217454983	gene-LOC122873669/gene-tsnare1/gene-LOC122883326/gene-LOC122869123/gene-eps8a/gene-LOC122871189	6	eps8a/LOC122869123/LOC122871189/LOC122873669/LOC122883326/tsnare1	5	gene-eps8a/gene-LOC122869123/gene-LOC122871189/gene-LOC122883326/gene-tsnare1	1
MF	GO:0004842	ubiquitin-protein transferase activity	11/603	207/15230	0.198849732900367	0.935554217454983	gene-LOC122875059/gene-LOC122875058/gene-LOC122878184/gene-LOC122879470/gene-LOC122879471/gene-lnx2b/gene-rnf208/gene-rc3h2/gene-rnf213b/gene-si:ch211-212k18.15/gene-LOC122870090	11	lnx2b/LOC122870090/LOC122875058/LOC122875059/LOC122878184/LOC122879470/LOC122879471/rc3h2/rnf208/rnf213b/si:ch211-212k18.15	9	gene-LOC122870090/gene-LOC122875058/gene-LOC122875059/gene-LOC122878184/gene-LOC122879470/gene-LOC122879471/gene-rc3h2/gene-rnf213b/gene-si:ch211-212k18.15	2
MF	GO:0004675	transmembrane receptor protein serine/threonine kinase activity	2/603	21/15230	0.201197283739469	0.935554217454983	gene-bmpr1ba/gene-LOC122872371	2	bmpr1ba/LOC122872371	0	-	2
MF	GO:0060589	nucleoside-triphosphatase regulator activity	20/603	413/15230	0.206340611548522	0.935554217454983	gene-LOC122869858/gene-arhgef38/gene-rgs12b/gene-arhgap25/gene-sgsm1a/gene-arhgef37/gene-rgl2/gene-LOC122883716/gene-rasgrp3/gene-arfgef3/gene-asap1a/gene-arhgap24/gene-LOC122865539/gene-spata13/gene-si:dkey-191m6.4/gene-rundc1/gene-tbc1d14/gene-LOC122869789/gene-tbc1d30/gene-LOC122871413	20	arfgef3/arhgap24/arhgap25/arhgef37/arhgef38/asap1a/LOC122865539/LOC122869789/LOC122869858/LOC122871413/LOC122883716/rasgrp3/rgl2/rgs12b/rundc1/sgsm1a/si:dkey-191m6.4/spata13/tbc1d14/tbc1d30	17	gene-arfgef3/gene-arhgap25/gene-arhgef37/gene-arhgef38/gene-asap1a/gene-LOC122865539/gene-LOC122869789/gene-LOC122869858/gene-LOC122871413/gene-rasgrp3/gene-rgl2/gene-rundc1/gene-sgsm1a/gene-si:dkey-191m6.4/gene-spata13/gene-tbc1d14/gene-tbc1d30	3
MF	GO:0015020	glucuronosyltransferase activity	2/603	22/15230	0.215879338287913	0.935554217454983	gene-LOC122875732/gene-LOC122863823	2	LOC122863823/LOC122875732	0	-	2
MF	GO:0044877	protein-containing complex binding	14/603	279/15230	0.217554477711208	0.935554217454983	gene-gnao1b/gene-pstpip1b/gene-lamb3/gene-LOC122872091/gene-LOC122873669/gene-LOC122870658/gene-evpla/gene-podn/gene-LOC122880325/gene-svila/gene-LOC122867164/gene-LOC122868750/gene-si:ch73-335l21.1/gene-LOC122871189	14	evpla/gnao1b/lamb3/LOC122867164/LOC122868750/LOC122870658/LOC122871189/LOC122872091/LOC122873669/LOC122880325/podn/pstpip1b/si:ch73-335l21.1/svila	9	gene-evpla/gene-lamb3/gene-LOC122868750/gene-LOC122870658/gene-LOC122871189/gene-LOC122880325/gene-podn/gene-pstpip1b/gene-svila	5
MF	GO:0016763	transferase activity, transferring pentosyl groups	4/603	61/15230	0.221649088603628	0.935554217454983	gene-parp12a/gene-LOC122876199/gene-si:ch73-252i11.1/Novel.138	4	LOC122876199/parp12a/si:ch73-252i11.1/Novel.138	4	gene-LOC122876199/gene-parp12a/gene-si:ch73-252i11.1/Novel.138	0
MF	GO:0005201	extracellular matrix structural constituent	4/603	62/15230	0.230152326915959	0.935554217454983	gene-LOC122867726/gene-lamb3/gene-soat1/gene-matn1	4	lamb3/LOC122867726/matn1/soat1	3	gene-lamb3/gene-matn1/gene-soat1	1
MF	GO:0004181	metallocarboxypeptidase activity	2/603	23/15230	0.230652693656519	0.935554217454983	gene-cpxm1a/gene-cpxm2	2	cpxm1a/cpxm2	2	gene-cpxm1a/gene-cpxm2	0
MF	GO:0004435	phosphatidylinositol phospholipase C activity	2/603	23/15230	0.230652693656519	0.935554217454983	gene-LOC122881246/gene-plcd3a	2	LOC122881246/plcd3a	1	gene-plcd3a	1
MF	GO:0004629	phospholipase C activity	2/603	23/15230	0.230652693656519	0.935554217454983	gene-LOC122881246/gene-plcd3a	2	LOC122881246/plcd3a	1	gene-plcd3a	1
MF	GO:0016831	carboxy-lyase activity	2/603	23/15230	0.230652693656519	0.935554217454983	gene-ddc/gene-pck2	2	ddc/pck2	2	gene-ddc/gene-pck2	0
MF	GO:0050661	NADP binding	2/603	23/15230	0.230652693656519	0.935554217454983	gene-h6pd/gene-LOC122883245	2	h6pd/LOC122883245	2	gene-h6pd/gene-LOC122883245	0
MF	GO:0015631	tubulin binding	10/603	195/15230	0.245218007024901	0.935554217454983	gene-map1aa/gene-LOC122875409/gene-kif21a/gene-mtus2b/gene-fmn2a/gene-kif1ab/gene-LOC122861414/gene-kif26bb/gene-fmn1/gene-LOC122863271	10	fmn1/fmn2a/kif1ab/kif21a/kif26bb/LOC122861414/LOC122863271/LOC122875409/map1aa/mtus2b	9	gene-fmn1/gene-kif1ab/gene-kif21a/gene-kif26bb/gene-LOC122861414/gene-LOC122863271/gene-LOC122875409/gene-map1aa/gene-mtus2b	1
MF	GO:0019213	deacetylase activity	2/603	24/15230	0.245487164192871	0.935554217454983	gene-macrod1/gene-hdac9b	2	hdac9b/macrod1	2	gene-hdac9b/gene-macrod1	0
MF	GO:0019787	ubiquitin-like protein transferase activity	11/603	218/15230	0.246960881630897	0.935554217454983	gene-LOC122875059/gene-LOC122875058/gene-LOC122878184/gene-LOC122879470/gene-LOC122879471/gene-lnx2b/gene-rnf208/gene-rc3h2/gene-rnf213b/gene-si:ch211-212k18.15/gene-LOC122870090	11	lnx2b/LOC122870090/LOC122875058/LOC122875059/LOC122878184/LOC122879470/LOC122879471/rc3h2/rnf208/rnf213b/si:ch211-212k18.15	9	gene-LOC122870090/gene-LOC122875058/gene-LOC122875059/gene-LOC122878184/gene-LOC122879470/gene-LOC122879471/gene-rc3h2/gene-rnf213b/gene-si:ch211-212k18.15	2
MF	GO:0016791	phosphatase activity	15/603	310/15230	0.24821761740142	0.935554217454983	gene-eya2/gene-inpp4b/gene-dusp5/gene-fbp2/gene-plppr3b/gene-plpp3/gene-ptpn11b/gene-ptprna/gene-lpin1b/gene-LOC122865803/gene-LOC122866917/gene-LOC122868405/gene-ptpro/gene-pfkfb3/gene-LOC122871755	15	dusp5/eya2/fbp2/inpp4b/LOC122865803/LOC122866917/LOC122868405/LOC122871755/lpin1b/pfkfb3/plpp3/plppr3b/ptpn11b/ptprna/ptpro	11	gene-dusp5/gene-fbp2/gene-LOC122865803/gene-LOC122866917/gene-LOC122868405/gene-LOC122871755/gene-lpin1b/gene-pfkfb3/gene-plppr3b/gene-ptpn11b/gene-ptprna	4
MF	GO:0019901	protein kinase binding	5/603	87/15230	0.261659107085989	0.935554217454983	gene-LOC122872164/gene-dok7b/gene-LOC122877465/gene-cnksr1/gene-tbc1d14	5	cnksr1/dok7b/LOC122872164/LOC122877465/tbc1d14	3	gene-LOC122872164/gene-LOC122877465/gene-tbc1d14	2
MF	GO:0008188	neuropeptide receptor activity	3/603	45/15230	0.263143115581647	0.935554217454983	gene-tacr2/gene-npffr1l2/gene-oprm1	3	npffr1l2/oprm1/tacr2	3	gene-npffr1l2/gene-oprm1/gene-tacr2	0
MF	GO:0019838	growth factor binding	3/603	45/15230	0.263143115581647	0.935554217454983	gene-LOC122873543/gene-ccn1/gene-ccn2a	3	ccn1/ccn2a/LOC122873543	1	gene-LOC122873543	2
MF	GO:0038024	cargo receptor activity	4/603	66/15230	0.264897805366557	0.935554217454983	gene-vtna/gene-loxl3b/gene-LOC122864727/gene-LOC122870595	4	LOC122864727/LOC122870595/loxl3b/vtna	2	gene-LOC122864727/gene-vtna	2
MF	GO:0019200	carbohydrate kinase activity	2/603	26/15230	0.275229777410034	0.935554217454983	gene-LOC122886641/gene-pfkfb3	2	LOC122886641/pfkfb3	2	gene-LOC122886641/gene-pfkfb3	0
MF	GO:0003714	transcription corepressor activity	3/603	47/15230	0.284847069497868	0.935554217454983	gene-trib3/gene-LOC122888999/gene-jazf1a	3	jazf1a/LOC122888999/trib3	1	gene-trib3	2
MF	GO:0015294	solute:cation symporter activity	2/603	27/15230	0.290088236112236	0.935554217454983	gene-slc12a5a/gene-slc34a1b	2	slc12a5a/slc34a1b	2	gene-slc12a5a/gene-slc34a1b	0
MF	GO:0015491	cation:cation antiporter activity	2/603	27/15230	0.290088236112236	0.935554217454983	gene-slc8a2b/gene-slc8a3	2	slc8a2b/slc8a3	2	gene-slc8a2b/gene-slc8a3	0
MF	GO:0061629	RNA polymerase II-specific DNA-binding transcription factor binding	2/603	27/15230	0.290088236112236	0.935554217454983	gene-snai1a/gene-LOC122877917	2	LOC122877917/snai1a	1	gene-LOC122877917	1
MF	GO:0005096	GTPase activator activity	9/603	182/15230	0.295249916031978	0.935554217454983	gene-arhgap25/gene-sgsm1a/gene-asap1a/gene-arhgap24/gene-si:dkey-191m6.4/gene-rundc1/gene-tbc1d14/gene-tbc1d30/gene-LOC122871413	9	arhgap24/arhgap25/asap1a/LOC122871413/rundc1/sgsm1a/si:dkey-191m6.4/tbc1d14/tbc1d30	8	gene-arhgap25/gene-asap1a/gene-LOC122871413/gene-rundc1/gene-sgsm1a/gene-si:dkey-191m6.4/gene-tbc1d14/gene-tbc1d30	1
MF	GO:0015298	solute:cation antiporter activity	2/603	28/15230	0.304908202761476	0.935554217454983	gene-slc8a2b/gene-slc8a3	2	slc8a2b/slc8a3	2	gene-slc8a2b/gene-slc8a3	0
MF	GO:0052866	phosphatidylinositol phosphate phosphatase activity	2/603	28/15230	0.304908202761476	0.935554217454983	gene-inpp4b/gene-LOC122871755	2	inpp4b/LOC122871755	1	gene-LOC122871755	1
MF	GO:0005525	GTP binding	22/603	491/15230	0.304917454084049	0.935554217454983	gene-gnao1b/gene-LOC122882713/gene-LOC122862285/gene-LOC122887291/gene-LOC122873201/gene-LOC122874274/gene-LOC122877379/gene-gucy1a2/gene-LOC122880439/gene-rab11al/gene-gem/gene-LOC122884943/gene-mfn1a/gene-adss1/gene-rab32a/gene-pck2/gene-arl5c/gene-LOC122868820/gene-LOC122868453/gene-LOC122868599/gene-LOC122871083/gene-rerg	22	adss1/arl5c/gem/gnao1b/gucy1a2/LOC122862285/LOC122868453/LOC122868599/LOC122868820/LOC122871083/LOC122873201/LOC122874274/LOC122877379/LOC122880439/LOC122882713/LOC122884943/LOC122887291/mfn1a/pck2/rab11al/rab32a/rerg	18	gene-adss1/gene-arl5c/gene-gem/gene-gucy1a2/gene-LOC122862285/gene-LOC122868453/gene-LOC122868599/gene-LOC122873201/gene-LOC122874274/gene-LOC122877379/gene-LOC122880439/gene-LOC122882713/gene-LOC122884943/gene-LOC122887291/gene-mfn1a/gene-pck2/gene-rab11al/gene-rab32a	4
MF	GO:0032550	purine ribonucleoside binding	22/603	491/15230	0.304917454084049	0.935554217454983	gene-gnao1b/gene-LOC122882713/gene-LOC122862285/gene-LOC122887291/gene-LOC122873201/gene-LOC122874274/gene-LOC122877379/gene-gucy1a2/gene-LOC122880439/gene-rab11al/gene-gem/gene-LOC122884943/gene-mfn1a/gene-adss1/gene-rab32a/gene-pck2/gene-arl5c/gene-LOC122868820/gene-LOC122868453/gene-LOC122868599/gene-LOC122871083/gene-rerg	22	adss1/arl5c/gem/gnao1b/gucy1a2/LOC122862285/LOC122868453/LOC122868599/LOC122868820/LOC122871083/LOC122873201/LOC122874274/LOC122877379/LOC122880439/LOC122882713/LOC122884943/LOC122887291/mfn1a/pck2/rab11al/rab32a/rerg	18	gene-adss1/gene-arl5c/gene-gem/gene-gucy1a2/gene-LOC122862285/gene-LOC122868453/gene-LOC122868599/gene-LOC122873201/gene-LOC122874274/gene-LOC122877379/gene-LOC122880439/gene-LOC122882713/gene-LOC122884943/gene-LOC122887291/gene-mfn1a/gene-pck2/gene-rab11al/gene-rab32a	4
MF	GO:0001883	purine nucleoside binding	22/603	492/15230	0.308252841163175	0.935554217454983	gene-gnao1b/gene-LOC122882713/gene-LOC122862285/gene-LOC122887291/gene-LOC122873201/gene-LOC122874274/gene-LOC122877379/gene-gucy1a2/gene-LOC122880439/gene-rab11al/gene-gem/gene-LOC122884943/gene-mfn1a/gene-adss1/gene-rab32a/gene-pck2/gene-arl5c/gene-LOC122868820/gene-LOC122868453/gene-LOC122868599/gene-LOC122871083/gene-rerg	22	adss1/arl5c/gem/gnao1b/gucy1a2/LOC122862285/LOC122868453/LOC122868599/LOC122868820/LOC122871083/LOC122873201/LOC122874274/LOC122877379/LOC122880439/LOC122882713/LOC122884943/LOC122887291/mfn1a/pck2/rab11al/rab32a/rerg	18	gene-adss1/gene-arl5c/gene-gem/gene-gucy1a2/gene-LOC122862285/gene-LOC122868453/gene-LOC122868599/gene-LOC122873201/gene-LOC122874274/gene-LOC122877379/gene-LOC122880439/gene-LOC122882713/gene-LOC122884943/gene-LOC122887291/gene-mfn1a/gene-pck2/gene-rab11al/gene-rab32a	4
MF	GO:0032549	ribonucleoside binding	22/603	495/15230	0.318326073759931	0.935554217454983	gene-gnao1b/gene-LOC122882713/gene-LOC122862285/gene-LOC122887291/gene-LOC122873201/gene-LOC122874274/gene-LOC122877379/gene-gucy1a2/gene-LOC122880439/gene-rab11al/gene-gem/gene-LOC122884943/gene-mfn1a/gene-adss1/gene-rab32a/gene-pck2/gene-arl5c/gene-LOC122868820/gene-LOC122868453/gene-LOC122868599/gene-LOC122871083/gene-rerg	22	adss1/arl5c/gem/gnao1b/gucy1a2/LOC122862285/LOC122868453/LOC122868599/LOC122868820/LOC122871083/LOC122873201/LOC122874274/LOC122877379/LOC122880439/LOC122882713/LOC122884943/LOC122887291/mfn1a/pck2/rab11al/rab32a/rerg	18	gene-adss1/gene-arl5c/gene-gem/gene-gucy1a2/gene-LOC122862285/gene-LOC122868453/gene-LOC122868599/gene-LOC122873201/gene-LOC122874274/gene-LOC122877379/gene-LOC122880439/gene-LOC122882713/gene-LOC122884943/gene-LOC122887291/gene-mfn1a/gene-pck2/gene-rab11al/gene-rab32a	4
MF	GO:0001882	nucleoside binding	22/603	496/15230	0.321705255004019	0.935554217454983	gene-gnao1b/gene-LOC122882713/gene-LOC122862285/gene-LOC122887291/gene-LOC122873201/gene-LOC122874274/gene-LOC122877379/gene-gucy1a2/gene-LOC122880439/gene-rab11al/gene-gem/gene-LOC122884943/gene-mfn1a/gene-adss1/gene-rab32a/gene-pck2/gene-arl5c/gene-LOC122868820/gene-LOC122868453/gene-LOC122868599/gene-LOC122871083/gene-rerg	22	adss1/arl5c/gem/gnao1b/gucy1a2/LOC122862285/LOC122868453/LOC122868599/LOC122868820/LOC122871083/LOC122873201/LOC122874274/LOC122877379/LOC122880439/LOC122882713/LOC122884943/LOC122887291/mfn1a/pck2/rab11al/rab32a/rerg	18	gene-adss1/gene-arl5c/gene-gem/gene-gucy1a2/gene-LOC122862285/gene-LOC122868453/gene-LOC122868599/gene-LOC122873201/gene-LOC122874274/gene-LOC122877379/gene-LOC122880439/gene-LOC122882713/gene-LOC122884943/gene-LOC122887291/gene-mfn1a/gene-pck2/gene-rab11al/gene-rab32a	4
MF	GO:0019900	kinase binding	5/603	95/15230	0.323502574983303	0.935554217454983	gene-LOC122872164/gene-dok7b/gene-LOC122877465/gene-cnksr1/gene-tbc1d14	5	cnksr1/dok7b/LOC122872164/LOC122877465/tbc1d14	3	gene-LOC122872164/gene-LOC122877465/gene-tbc1d14	2
MF	GO:0019207	kinase regulator activity	4/603	73/15230	0.327589063688459	0.935554217454983	gene-LOC122873544/gene-LOC122877917/gene-pkig/gene-LOC122869123	4	LOC122869123/LOC122873544/LOC122877917/pkig	4	gene-LOC122869123/gene-LOC122873544/gene-LOC122877917/gene-pkig	0
[truncated: 296 more rows]
