# Supplementary material for: Siniperca chuatsi Rhabdovirus (SCRV)-Induced Key Pathways and Major Antiviral Genes in Fish Cells
Source: Microorganisms. 2022 Dec 13;10(12):2464. doi: 10.3390/microorganisms10122464 (PMC9788611; doi:10.3390/microorganisms10122464)
Supplement: Supplementary file 1 [file microorganisms-10-02464-s001.zip › Table S5. S0_vs_S36.GO.enrichment.xls]

ONTOLOGY	ID	Description	GeneRatio	BgRatio	pvalue	p.adjust	geneID	Count	GeneName	Up_count	Up_geneID	Down_count
BP	GO:0070848	response to growth factor	23/646	143/11595	3.86538090082211e-06	0.00341108296084535	gene-smad3a/gene-LOC122863684/gene-fgf7/gene-pmepa1/gene-sulf2a/gene-vegfc/gene-smad6b/gene-ndnf/gene-LOC122877917/gene-spartb/gene-LOC122881519/gene-sfrp5/gene-snai2/gene-smad9/gene-LOC122888753/gene-id2a/gene-sp8a/gene-tnca/gene-smad7/gene-bambia/gene-dok6/gene-nog2/gene-LOC122871826	23	bambia/dok6/fgf7/id2a/LOC122863684/LOC122871826/LOC122877917/LOC122881519/LOC122888753/ndnf/nog2/pmepa1/sfrp5/smad3a/smad6b/smad7/smad9/snai2/sp8a/spartb/sulf2a/tnca/vegfc	6	gene-dok6/gene-LOC122877917/gene-LOC122881519/gene-LOC122888753/gene-spartb/gene-sulf2a	17
BP	GO:0071495	cellular response to endogenous stimulus	29/646	207/11595	3.96637553586669e-06	0.00341108296084535	gene-smad3a/gene-LOC122863684/gene-fgf7/gene-pmepa1/gene-LOC122864683/gene-sulf2a/gene-smad6b/gene-LOC122878127/gene-ndnf/gene-LOC122877917/gene-pid1/gene-spartb/gene-LOC122881519/gene-sfrp5/gene-irs2b/gene-snai2/gene-smad9/gene-LOC122888753/gene-id2a/gene-sp8a/gene-tnca/gene-LOC122865952/gene-smad7/gene-bambia/gene-nog2/gene-baiap2l1a/gene-wbp2/gene-si:ch73-335l21.1/gene-LOC122871826	29	baiap2l1a/bambia/fgf7/id2a/irs2b/LOC122863684/LOC122864683/LOC122865952/LOC122871826/LOC122877917/LOC122878127/LOC122881519/LOC122888753/ndnf/nog2/pid1/pmepa1/sfrp5/si:ch73-335l21.1/smad3a/smad6b/smad7/smad9/snai2/sp8a/spartb/sulf2a/tnca/wbp2	9	gene-baiap2l1a/gene-LOC122864683/gene-LOC122877917/gene-LOC122878127/gene-LOC122881519/gene-LOC122888753/gene-spartb/gene-sulf2a/gene-wbp2	20
BP	GO:0071363	cellular response to growth factor stimulus	22/646	142/11595	1.1608825258554e-05	0.00459899108852581	gene-smad3a/gene-LOC122863684/gene-fgf7/gene-pmepa1/gene-sulf2a/gene-vegfc/gene-smad6b/gene-ndnf/gene-LOC122877917/gene-spartb/gene-LOC122881519/gene-sfrp5/gene-snai2/gene-smad9/gene-LOC122888753/gene-id2a/gene-sp8a/gene-smad7/gene-bambia/gene-dok6/gene-nog2/gene-LOC122871826	22	bambia/dok6/fgf7/id2a/LOC122863684/LOC122871826/LOC122877917/LOC122881519/LOC122888753/ndnf/nog2/pmepa1/sfrp5/smad3a/smad6b/smad7/smad9/snai2/sp8a/spartb/sulf2a/vegfc	6	gene-dok6/gene-LOC122877917/gene-LOC122881519/gene-LOC122888753/gene-spartb/gene-sulf2a	16
BP	GO:0009719	response to endogenous stimulus	30/646	233/11595	1.50463024128976e-05	0.00459899108852581	gene-smad3a/gene-LOC122863684/gene-fgf7/gene-pmepa1/gene-LOC122864683/gene-sulf2a/gene-smad6b/gene-LOC122878127/gene-ndnf/gene-LOC122877917/gene-pid1/gene-spartb/gene-LOC122881519/gene-sfrp5/gene-irs2b/gene-snai2/gene-smad9/gene-LOC122888753/gene-id2a/gene-paqr8/gene-sp8a/gene-tnca/gene-LOC122865952/gene-smad7/gene-bambia/gene-nog2/gene-baiap2l1a/gene-wbp2/gene-si:ch73-335l21.1/gene-LOC122871826	30	baiap2l1a/bambia/fgf7/id2a/irs2b/LOC122863684/LOC122864683/LOC122865952/LOC122871826/LOC122877917/LOC122878127/LOC122881519/LOC122888753/ndnf/nog2/paqr8/pid1/pmepa1/sfrp5/si:ch73-335l21.1/smad3a/smad6b/smad7/smad9/snai2/sp8a/spartb/sulf2a/tnca/wbp2	10	gene-baiap2l1a/gene-LOC122864683/gene-LOC122877917/gene-LOC122878127/gene-LOC122881519/gene-LOC122888753/gene-paqr8/gene-spartb/gene-sulf2a/gene-wbp2	20
BP	GO:0007167	enzyme linked receptor protein signaling pathway	32/646	257/11595	1.57465175491797e-05	0.00459899108852581	gene-smad3a/gene-LOC122863684/gene-fgf7/gene-pmepa1/gene-sulf2a/gene-mst1rb/gene-vegfc/gene-smad6b/gene-wdr54/gene-LOC122878127/gene-pid1/gene-spartb/gene-kdrl/gene-csf1ra/gene-LOC122881519/gene-dact2/gene-sfrp5/gene-irs2b/gene-LOC122887564/gene-smad9/gene-LOC122888753/gene-id2a/gene-efna1a/gene-sp8a/gene-smad7/gene-LOC122865520/gene-bambia/gene-dok6/gene-nog2/gene-baiap2l1a/gene-si:ch73-335l21.1…	32	baiap2l1a/bambia/csf1ra/dact2/dok6/efna1a/fgf7/id2a/irs2b/kdrl/LOC122863684/LOC122865520/LOC122871826/LOC122878127/LOC122881519/LOC122887564/LOC122888753/mst1rb/nog2/pid1/pmepa1/sfrp5/si:ch73-335l21.1/smad3a/smad6b/smad7/smad9/sp8a/spartb/sulf2a/vegfc/wdr54	9	gene-baiap2l1a/gene-csf1ra/gene-dok6/gene-efna1a/gene-LOC122878127/gene-LOC122881519/gene-LOC122888753/gene-spartb/gene-sulf2a	23
BP	GO:0071310	cellular response to organic substance	38/646	330/11595	1.60429921692761e-05	0.00459899108852581	gene-smad3a/gene-LOC122863684/gene-fgf7/gene-pmepa1/gene-LOC122864683/gene-sulf2a/gene-cxcl12b/gene-nptx1l/gene-vegfc/gene-smad6b/gene-LOC122878212/gene-LOC122878127/gene-ndnf/gene-LOC122877917/gene-pid1/gene-spartb/gene-csf1ra/gene-LOC122881519/gene-sfrp5/gene-irs2b/gene-snai2/gene-smad9/gene-LOC122888753/gene-id2a/gene-cmpk2/gene-sp8a/gene-tnca/gene-LOC122865952/gene-smad7/gene-bambia/gene-dok6…	38	baiap2l1a/bambia/cmpk2/csf1ra/cxcl12b/dok6/fgf7/id2a/irs2b/LOC122863684/LOC122864683/LOC122865952/LOC122868174/LOC122868820/LOC122871826/LOC122877917/LOC122878127/LOC122878212/LOC122881519/LOC122888753/ndnf/nog2/nptx1l/pid1/pmepa1/sfrp5/si:ch73-335l21.1/smad3a/smad6b/smad7/smad9/snai2/sp8a/spartb/sulf2a/tnca/vegfc/wbp2	15	gene-baiap2l1a/gene-cmpk2/gene-csf1ra/gene-dok6/gene-LOC122864683/gene-LOC122868174/gene-LOC122877917/gene-LOC122878127/gene-LOC122878212/gene-LOC122881519/gene-LOC122888753/gene-nptx1l/gene-spartb/gene-sulf2a/gene-wbp2	23
BP	GO:0007229	integrin-mediated signaling pathway	12/646	54/11595	3.19398566489541e-05	0.00784807906231443	gene-itgb6/gene-itga7/gene-LOC122888504/gene-itga8/gene-itga5/gene-itga9/gene-itgb2/gene-itgb5/gene-LOC122886328/gene-itga1/gene-fybb/gene-itga3b	12	fybb/itga1/itga3b/itga5/itga7/itga8/itga9/itgb2/itgb5/itgb6/LOC122886328/LOC122888504	8	gene-fybb/gene-itga3b/gene-itga7/gene-itgb2/gene-itgb5/gene-itgb6/gene-LOC122886328/gene-LOC122888504	4
BP	GO:0034330	cell junction organization	18/646	113/11595	4.90807832025311e-05	0.0105523683885442	gene-LOC122872091/gene-nptx1l/gene-pclob/gene-ppfibp2b/gene-LOC122878127/gene-nlgn1/gene-snai2/gene-grhl1/gene-cnksr1/gene-LOC122863118/gene-tnca/gene-ajm1/gene-pdzph1/gene-phldb2b/gene-si:ch211-198m17.1/gene-si:ch211-278a6.1/gene-LOC122869537/gene-pdzrn4	18	ajm1/cnksr1/grhl1/LOC122863118/LOC122869537/LOC122872091/LOC122878127/nlgn1/nptx1l/pclob/pdzph1/pdzrn4/phldb2b/ppfibp2b/si:ch211-198m17.1/si:ch211-278a6.1/snai2/tnca	10	gene-ajm1/gene-grhl1/gene-LOC122863118/gene-LOC122869537/gene-LOC122878127/gene-nlgn1/gene-nptx1l/gene-pclob/gene-pdzph1/gene-si:ch211-278a6.1	8
BP	GO:0072359	circulatory system development	40/646	375/11595	5.66687158096613e-05	0.0108300212436242	gene-padi2/gene-skib/gene-LOC122870658/gene-vegfc/gene-angptl2b/gene-lrrc39/gene-LOC122877908/gene-amotl2a/gene-nlgn1/gene-LOC122877917/gene-kdrl/gene-nkx2.5/gene-cadm4/gene-LOC122881975/gene-LOC122881976/gene-vegfaa/gene-snai2/gene-foxc1a/gene-angptl4/gene-LOC122887564/gene-ftr82/gene-tmem88a/gene-kdm6bb/gene-LOC122888062/gene-LOC122888753/gene-vegfab/gene-pard6gb/gene-angpt2b/gene-pdzph1/gene-L…	40	amotl2a/angpt2b/angptl2b/angptl4/cacna1c/cadm4/foxc1a/ftr82/fzd2/hspa12b/kdm6bb/kdrl/LOC122865452/LOC122866402/LOC122869378/LOC122870658/LOC122877908/LOC122877917/LOC122881975/LOC122881976/LOC122887564/LOC122888062/LOC122888753/lrrc39/mrtfbb/nkx2.5/nlgn1/padi2/pard6gb/pdzph1/pthlha/rcan1b/si:ch211-198m17.1/skib/snai2/tafa5a/tmem88a/vegfaa/vegfab/vegfc	18	gene-cadm4/gene-hspa12b/gene-LOC122866402/gene-LOC122869378/gene-LOC122870658/gene-LOC122877908/gene-LOC122877917/gene-LOC122881975/gene-LOC122881976/gene-LOC122888062/gene-LOC122888753/gene-lrrc39/gene-nlgn1/gene-padi2/gene-pdzph1/gene-rcan1b/gene-vegfaa/gene-vegfab	22
BP	GO:0070887	cellular response to chemical stimulus	42/646	410/11595	9.38691561810919e-05	0.0161454948631478	gene-smad3a/gene-LOC122863684/gene-fgf7/gene-swap70a/gene-pmepa1/gene-LOC122864683/gene-sulf2a/gene-LOC122873767/gene-cxcl12b/gene-nptx1l/gene-vegfc/gene-smad6b/gene-LOC122878212/gene-LOC122878127/gene-ndnf/gene-LOC122877917/gene-pid1/gene-spartb/gene-csf1ra/gene-LOC122881519/gene-sfrp5/gene-irs2b/gene-snai2/gene-smad9/gene-LOC122888753/gene-id2a/gene-cmpk2/gene-sp8a/gene-tnca/gene-LOC122865952/g…	42	baiap2l1a/bambia/cbx8a/cmpk2/csf1ra/cxcl12b/dok6/fgf7/id2a/irs2b/LOC122863684/LOC122864683/LOC122865952/LOC122868174/LOC122868820/LOC122871826/LOC122873767/LOC122877917/LOC122878127/LOC122878212/LOC122881519/LOC122888753/ndnf/nfe2l1a/nog2/nptx1l/pid1/pmepa1/sfrp5/si:ch73-335l21.1/smad3a/smad6b/smad7/smad9/snai2/sp8a/spartb/sulf2a/swap70a/tnca/vegfc/wbp2	17	gene-baiap2l1a/gene-cmpk2/gene-csf1ra/gene-dok6/gene-LOC122864683/gene-LOC122868174/gene-LOC122873767/gene-LOC122877917/gene-LOC122878127/gene-LOC122878212/gene-LOC122881519/gene-LOC122888753/gene-nfe2l1a/gene-nptx1l/gene-spartb/gene-sulf2a/gene-wbp2	25
BP	GO:0007178	transmembrane receptor protein serine/threonine kinase signaling pathway	14/646	81/11595	0.000136482693431263	0.0213409302456157	gene-smad3a/gene-LOC122863684/gene-pmepa1/gene-smad6b/gene-spartb/gene-LOC122881519/gene-dact2/gene-sfrp5/gene-smad9/gene-id2a/gene-smad7/gene-bambia/gene-nog2/gene-LOC122871826	14	bambia/dact2/id2a/LOC122863684/LOC122871826/LOC122881519/nog2/pmepa1/sfrp5/smad3a/smad6b/smad7/smad9/spartb	2	gene-LOC122881519/gene-spartb	12
BP	GO:0007179	transforming growth factor beta receptor signaling pathway	9/646	38/11595	0.000185457628236199	0.0223087886173111	gene-smad3a/gene-LOC122863684/gene-pmepa1/gene-smad6b/gene-LOC122881519/gene-smad9/gene-smad7/gene-bambia/gene-LOC122871826	9	bambia/LOC122863684/LOC122871826/LOC122881519/pmepa1/smad3a/smad6b/smad7/smad9	1	gene-LOC122881519	8
BP	GO:0071559	response to transforming growth factor beta	9/646	38/11595	0.000185457628236199	0.0223087886173111	gene-smad3a/gene-LOC122863684/gene-pmepa1/gene-smad6b/gene-LOC122881519/gene-smad9/gene-smad7/gene-bambia/gene-LOC122871826	9	bambia/LOC122863684/LOC122871826/LOC122881519/pmepa1/smad3a/smad6b/smad7/smad9	1	gene-LOC122881519	8
BP	GO:0071560	cellular response to transforming growth factor beta stimulus	9/646	38/11595	0.000185457628236199	0.0223087886173111	gene-smad3a/gene-LOC122863684/gene-pmepa1/gene-smad6b/gene-LOC122881519/gene-smad9/gene-smad7/gene-bambia/gene-LOC122871826	9	bambia/LOC122863684/LOC122871826/LOC122881519/pmepa1/smad3a/smad6b/smad7/smad9	1	gene-LOC122881519	8
BP	GO:0001944	vasculature development	27/646	230/11595	0.000194553389104457	0.0223087886173111	gene-padi2/gene-LOC122870658/gene-vegfc/gene-angptl2b/gene-LOC122877908/gene-amotl2a/gene-nlgn1/gene-LOC122877917/gene-kdrl/gene-LOC122881975/gene-LOC122881976/gene-vegfaa/gene-foxc1a/gene-angptl4/gene-LOC122887564/gene-ftr82/gene-LOC122888753/gene-vegfab/gene-angpt2b/gene-LOC122865452/gene-LOC122866402/gene-LOC122869378/gene-mrtfbb/gene-hspa12b/gene-pthlha/gene-tafa5a/gene-rcan1b	27	amotl2a/angpt2b/angptl2b/angptl4/foxc1a/ftr82/hspa12b/kdrl/LOC122865452/LOC122866402/LOC122869378/LOC122870658/LOC122877908/LOC122877917/LOC122881975/LOC122881976/LOC122887564/LOC122888753/mrtfbb/nlgn1/padi2/pthlha/rcan1b/tafa5a/vegfaa/vegfab/vegfc	14	gene-hspa12b/gene-LOC122866402/gene-LOC122869378/gene-LOC122870658/gene-LOC122877908/gene-LOC122877917/gene-LOC122881975/gene-LOC122881976/gene-LOC122888753/gene-nlgn1/gene-padi2/gene-rcan1b/gene-vegfaa/gene-vegfab	13
BP	GO:0001568	blood vessel development	25/646	209/11595	0.000248291645044104	0.0258279469330749	gene-LOC122870658/gene-vegfc/gene-angptl2b/gene-LOC122877908/gene-amotl2a/gene-nlgn1/gene-LOC122877917/gene-kdrl/gene-LOC122881975/gene-LOC122881976/gene-vegfaa/gene-foxc1a/gene-angptl4/gene-LOC122887564/gene-LOC122888753/gene-vegfab/gene-angpt2b/gene-LOC122865452/gene-LOC122866402/gene-LOC122869378/gene-mrtfbb/gene-hspa12b/gene-pthlha/gene-tafa5a/gene-rcan1b	25	amotl2a/angpt2b/angptl2b/angptl4/foxc1a/hspa12b/kdrl/LOC122865452/LOC122866402/LOC122869378/LOC122870658/LOC122877908/LOC122877917/LOC122881975/LOC122881976/LOC122887564/LOC122888753/mrtfbb/nlgn1/pthlha/rcan1b/tafa5a/vegfaa/vegfab/vegfc	13	gene-hspa12b/gene-LOC122866402/gene-LOC122869378/gene-LOC122870658/gene-LOC122877908/gene-LOC122877917/gene-LOC122881975/gene-LOC122881976/gene-LOC122888753/gene-nlgn1/gene-rcan1b/gene-vegfaa/gene-vegfab	12
BP	GO:0001525	angiogenesis	21/646	162/11595	0.000255276219687368	0.0258279469330749	gene-LOC122870658/gene-vegfc/gene-angptl2b/gene-LOC122877908/gene-amotl2a/gene-nlgn1/gene-LOC122877917/gene-kdrl/gene-LOC122881975/gene-LOC122881976/gene-vegfaa/gene-angptl4/gene-LOC122887564/gene-LOC122888753/gene-vegfab/gene-LOC122865452/gene-LOC122866402/gene-LOC122869378/gene-hspa12b/gene-tafa5a/gene-rcan1b	21	amotl2a/angptl2b/angptl4/hspa12b/kdrl/LOC122865452/LOC122866402/LOC122869378/LOC122870658/LOC122877908/LOC122877917/LOC122881975/LOC122881976/LOC122887564/LOC122888753/nlgn1/rcan1b/tafa5a/vegfaa/vegfab/vegfc	13	gene-hspa12b/gene-LOC122866402/gene-LOC122869378/gene-LOC122870658/gene-LOC122877908/gene-LOC122877917/gene-LOC122881975/gene-LOC122881976/gene-LOC122888753/gene-nlgn1/gene-rcan1b/gene-vegfaa/gene-vegfab	8
BP	GO:0006955	immune response	37/646	368/11595	0.000350886629819104	0.033529166849381	gene-swap70a/gene-tespa1/gene-tlr3/gene-LOC122873767/gene-cxcl12b/gene-LOC122873342/gene-nlrc5/gene-LOC122874995/gene-LOC122875308/gene-LOC122874983/gene-LOC122876711/gene-LOC122875929/gene-LOC122878212/gene-LOC122878108/gene-LOC122878107/gene-ccl44/gene-ptx3a/gene-vtna/gene-il15l/gene-LOC122880389/gene-LOC122881737/gene-LOC122884604/gene-ifih1/gene-LOC122888056/gene-irf1b/gene-rsad2/gene-LOC1228…	37	b2m/bcl6b/ccl44/cxcl12b/dhx58/ifi35/ifih1/il15l/irf1b/LOC122868174/LOC122868841/LOC122869242/LOC122869371/LOC122869735/LOC122869738/LOC122870587/LOC122873342/LOC122873767/LOC122874983/LOC122874995/LOC122875308/LOC122875929/LOC122876711/LOC122878107/LOC122878108/LOC122878212/LOC122880389/LOC122881737/LOC122884604/LOC122888056/nlrc5/ptx3a/rsad2/swap70a/tespa1/tlr3/vtna	29	gene-b2m/gene-bcl6b/gene-dhx58/gene-ifi35/gene-ifih1/gene-irf1b/gene-LOC122868174/gene-LOC122868841/gene-LOC122869242/gene-LOC122869371/gene-LOC122869735/gene-LOC122869738/gene-LOC122870587/gene-LOC122873342/gene-LOC122873767/gene-LOC122874995/gene-LOC122875308/gene-LOC122875929/gene-LOC122876711/gene-LOC122878107/gene-LOC122878108/gene-LOC122878212/gene-LOC122880389/gene-LOC122884604/gene-LOC122…	8
BP	GO:0009615	response to virus	9/646	43/11595	0.000499873344984476	0.0452516922828052	gene-tlr3/gene-LOC122878212/gene-wdfy4/gene-ifih1/gene-rsad2/gene-nfkbiaa/gene-LOC122868174/gene-ch25h/gene-dhx58	9	ch25h/dhx58/ifih1/LOC122868174/LOC122878212/nfkbiaa/rsad2/tlr3/wdfy4	8	gene-ch25h/gene-dhx58/gene-ifih1/gene-LOC122868174/gene-LOC122878212/gene-nfkbiaa/gene-rsad2/gene-wdfy4	1
BP	GO:0045216	cell-cell junction organization	7/646	27/11595	0.000537615974056286	0.0462349737688406	gene-LOC122872091/gene-snai2/gene-grhl1/gene-ajm1/gene-pdzph1/gene-si:ch211-198m17.1/gene-LOC122869537	7	ajm1/grhl1/LOC122869537/LOC122872091/pdzph1/si:ch211-198m17.1/snai2	4	gene-ajm1/gene-grhl1/gene-LOC122869537/gene-pdzph1	3
BP	GO:0016477	cell migration	28/646	261/11595	0.000657637215670101	0.0538636195691702	gene-cebpa/gene-swap70a/gene-LOC122875528/gene-snai1a/gene-lamb3/gene-LOC122873669/gene-LOC122873767/gene-vegfc/gene-carmil2/gene-reln/gene-plat/gene-LOC122877630/gene-LOC122878127/gene-ndnf/gene-amotl2a/gene-podn/gene-LOC122877917/gene-gpc4/gene-LOC122881975/gene-LOC122881976/gene-mmp9/gene-snai2/gene-phldb2b/gene-fzd2/gene-si:ch211-278a6.1/gene-mrtfbb/gene-LOC122871413/gene-tafa5a	28	amotl2a/carmil2/cebpa/fzd2/gpc4/lamb3/LOC122871413/LOC122873669/LOC122873767/LOC122875528/LOC122877630/LOC122877917/LOC122878127/LOC122881975/LOC122881976/mmp9/mrtfbb/ndnf/phldb2b/plat/podn/reln/si:ch211-278a6.1/snai1a/snai2/swap70a/tafa5a/vegfc	15	gene-carmil2/gene-cebpa/gene-lamb3/gene-LOC122871413/gene-LOC122873767/gene-LOC122875528/gene-LOC122877630/gene-LOC122877917/gene-LOC122878127/gene-LOC122881975/gene-LOC122881976/gene-mmp9/gene-plat/gene-podn/gene-si:ch211-278a6.1	13
BP	GO:0061035	regulation of cartilage development	5/646	14/11595	0.000694213604108203	0.0542748817757323	gene-rflna/gene-rflnb/gene-LOC122881519/gene-snai2/gene-tgfb3	5	LOC122881519/rflna/rflnb/snai2/tgfb3	1	gene-LOC122881519	4
BP	GO:0048514	blood vessel morphogenesis	22/646	189/11595	0.000830363548586899	0.0620967523291072	gene-LOC122870658/gene-vegfc/gene-angptl2b/gene-LOC122877908/gene-amotl2a/gene-nlgn1/gene-LOC122877917/gene-kdrl/gene-LOC122881975/gene-LOC122881976/gene-vegfaa/gene-angptl4/gene-LOC122887564/gene-LOC122888753/gene-vegfab/gene-LOC122865452/gene-LOC122866402/gene-LOC122869378/gene-mrtfbb/gene-hspa12b/gene-tafa5a/gene-rcan1b	22	amotl2a/angptl2b/angptl4/hspa12b/kdrl/LOC122865452/LOC122866402/LOC122869378/LOC122870658/LOC122877908/LOC122877917/LOC122881975/LOC122881976/LOC122887564/LOC122888753/mrtfbb/nlgn1/rcan1b/tafa5a/vegfaa/vegfab/vegfc	13	gene-hspa12b/gene-LOC122866402/gene-LOC122869378/gene-LOC122870658/gene-LOC122877908/gene-LOC122877917/gene-LOC122881975/gene-LOC122881976/gene-LOC122888753/gene-nlgn1/gene-rcan1b/gene-vegfaa/gene-vegfab	9
BP	GO:0048646	anatomical structure formation involved in morphogenesis	33/646	335/11595	0.00102548646704265	0.0734931968047233	gene-LOC122870658/gene-vegfc/gene-angptl2b/gene-lrrc39/gene-LOC122877908/gene-amotl2a/gene-nlgn1/gene-LOC122877917/gene-kdrl/gene-tmod4/gene-cadm4/gene-LOC122881975/gene-LOC122881976/gene-sox4b/gene-vegfaa/gene-myofl/gene-snai2/gene-angptl4/gene-LOC122887564/gene-LOC122888753/gene-vegfab/gene-pard6gb/gene-LOC122865452/gene-odad2/gene-phldb2b/gene-LOC122866402/gene-LOC122869123/gene-LOC122869378/g…	33	amotl2a/angptl2b/angptl4/cadm4/hspa12b/kdrl/LOC122865452/LOC122866402/LOC122869123/LOC122869378/LOC122870587/LOC122870658/LOC122877908/LOC122877917/LOC122881975/LOC122881976/LOC122887564/LOC122888753/lrrc39/myofl/nlgn1/odad2/pard6gb/phldb2b/rcan1b/rpgrb/snai2/sox4b/tafa5a/tmod4/vegfaa/vegfab/vegfc	18	gene-cadm4/gene-hspa12b/gene-LOC122866402/gene-LOC122869123/gene-LOC122869378/gene-LOC122870587/gene-LOC122870658/gene-LOC122877908/gene-LOC122877917/gene-LOC122881975/gene-LOC122881976/gene-LOC122888753/gene-lrrc39/gene-nlgn1/gene-rcan1b/gene-tmod4/gene-vegfaa/gene-vegfab	15
BP	GO:1901607	alpha-amino acid biosynthetic process	8/646	39/11595	0.00117422567770701	0.0807867266262424	gene-LOC122876938/gene-psat1/gene-glulb/gene-phgdh/gene-asns/gene-oat/gene-aldh18a1/gene-cbsa	8	aldh18a1/asns/cbsa/glulb/LOC122876938/oat/phgdh/psat1	7	gene-aldh18a1/gene-asns/gene-cbsa/gene-LOC122876938/gene-oat/gene-phgdh/gene-psat1	1
BP	GO:0090287	regulation of cellular response to growth factor stimulus	11/646	68/11595	0.00123729098269167	0.0818515573165261	gene-pmepa1/gene-sulf2a/gene-vegfc/gene-spartb/gene-LOC122881519/gene-sfrp5/gene-sp8a/gene-bambia/gene-dok6/gene-nog2/gene-LOC122871826	11	bambia/dok6/LOC122871826/LOC122881519/nog2/pmepa1/sfrp5/sp8a/spartb/sulf2a/vegfc	4	gene-dok6/gene-LOC122881519/gene-spartb/gene-sulf2a	7
BP	GO:0035239	tube morphogenesis	27/646	261/11595	0.00140717629356338	0.0896423416640376	gene-skib/gene-LOC122870658/gene-vegfc/gene-angptl2b/gene-LOC122877908/gene-amotl2a/gene-nlgn1/gene-LOC122877917/gene-kdrl/gene-LOC122881975/gene-LOC122881976/gene-vegfaa/gene-angptl4/gene-LOC122887564/gene-LOC122888753/gene-vegfab/gene-pard6gb/gene-tnca/gene-LOC122865452/gene-LOC122866402/gene-LOC122869378/gene-fzd2/gene-mrtfbb/gene-hspa12b/gene-cacna1c/gene-tafa5a/gene-rcan1b	27	amotl2a/angptl2b/angptl4/cacna1c/fzd2/hspa12b/kdrl/LOC122865452/LOC122866402/LOC122869378/LOC122870658/LOC122877908/LOC122877917/LOC122881975/LOC122881976/LOC122887564/LOC122888753/mrtfbb/nlgn1/pard6gb/rcan1b/skib/tafa5a/tnca/vegfaa/vegfab/vegfc	13	gene-hspa12b/gene-LOC122866402/gene-LOC122869378/gene-LOC122870658/gene-LOC122877908/gene-LOC122877917/gene-LOC122881975/gene-LOC122881976/gene-LOC122888753/gene-nlgn1/gene-rcan1b/gene-vegfaa/gene-vegfab	14
BP	GO:0050793	regulation of developmental process	38/646	412/11595	0.00151048114756224	0.0927866990645377	gene-metrnlb/gene-LOC122874938/gene-LOC122874995/gene-rflna/gene-brinp3a.2/gene-LOC122878127/gene-amotl2a/gene-LOC122877917/gene-omgb/gene-rflnb/gene-znf296/gene-spartb/gene-LOC122881519/gene-zbtb46/gene-snai2/gene-LOC122887176/gene-cfap410/gene-tmem88a/gene-LOC122888126/gene-tgfb3/gene-id2a/gene-tdrd6/gene-nfkbiaa/gene-pard6gb/gene-phldb2b/gene-boc/gene-nog2/gene-LOC122867164/gene-nupr1b/gene-si…	38	amotl2a/bcl6b/boc/brinp3a.2/caprin2/cfap410/id2a/LOC122867164/LOC122868714/LOC122869492/LOC122874938/LOC122874995/LOC122877917/LOC122878127/LOC122881519/LOC122887176/LOC122888126/lrrc17/metrnlb/mrtfbb/nfkbiaa/nog2/nupr1b/omgb/pard6gb/phldb2b/rflna/rflnb/sapcd1/si:ch211-278a6.1/snai2/spartb/tafa5a/tdrd6/tgfb3/tmem88a/zbtb46/znf296	15	gene-bcl6b/gene-caprin2/gene-LOC122869492/gene-LOC122874995/gene-LOC122877917/gene-LOC122878127/gene-LOC122881519/gene-metrnlb/gene-nfkbiaa/gene-nupr1b/gene-omgb/gene-sapcd1/gene-si:ch211-278a6.1/gene-spartb/gene-tdrd6	23
BP	GO:0048870	cell motility	30/646	304/11595	0.00165986446428231	0.0951655626188523	gene-cebpa/gene-swap70a/gene-LOC122875528/gene-gas8/gene-snai1a/gene-lamb3/gene-LOC122873669/gene-LOC122873767/gene-si:ch211-286b5.4/gene-vegfc/gene-carmil2/gene-reln/gene-plat/gene-LOC122877630/gene-LOC122878127/gene-ndnf/gene-amotl2a/gene-podn/gene-LOC122877917/gene-gpc4/gene-LOC122881975/gene-LOC122881976/gene-mmp9/gene-snai2/gene-phldb2b/gene-fzd2/gene-si:ch211-278a6.1/gene-mrtfbb/gene-LOC122…	30	amotl2a/carmil2/cebpa/fzd2/gas8/gpc4/lamb3/LOC122871413/LOC122873669/LOC122873767/LOC122875528/LOC122877630/LOC122877917/LOC122878127/LOC122881975/LOC122881976/mmp9/mrtfbb/ndnf/phldb2b/plat/podn/reln/si:ch211-278a6.1/si:ch211-286b5.4/snai1a/snai2/swap70a/tafa5a/vegfc	16	gene-carmil2/gene-cebpa/gene-lamb3/gene-LOC122871413/gene-LOC122873767/gene-LOC122875528/gene-LOC122877630/gene-LOC122877917/gene-LOC122878127/gene-LOC122881975/gene-LOC122881976/gene-mmp9/gene-plat/gene-podn/gene-si:ch211-278a6.1/gene-si:ch211-286b5.4	14
BP	GO:0051674	localization of cell	30/646	304/11595	0.00165986446428231	0.0951655626188523	gene-cebpa/gene-swap70a/gene-LOC122875528/gene-gas8/gene-snai1a/gene-lamb3/gene-LOC122873669/gene-LOC122873767/gene-si:ch211-286b5.4/gene-vegfc/gene-carmil2/gene-reln/gene-plat/gene-LOC122877630/gene-LOC122878127/gene-ndnf/gene-amotl2a/gene-podn/gene-LOC122877917/gene-gpc4/gene-LOC122881975/gene-LOC122881976/gene-mmp9/gene-snai2/gene-phldb2b/gene-fzd2/gene-si:ch211-278a6.1/gene-mrtfbb/gene-LOC122…	30	amotl2a/carmil2/cebpa/fzd2/gas8/gpc4/lamb3/LOC122871413/LOC122873669/LOC122873767/LOC122875528/LOC122877630/LOC122877917/LOC122878127/LOC122881975/LOC122881976/mmp9/mrtfbb/ndnf/phldb2b/plat/podn/reln/si:ch211-278a6.1/si:ch211-286b5.4/snai1a/snai2/swap70a/tafa5a/vegfc	16	gene-carmil2/gene-cebpa/gene-lamb3/gene-LOC122871413/gene-LOC122873767/gene-LOC122875528/gene-LOC122877630/gene-LOC122877917/gene-LOC122878127/gene-LOC122881975/gene-LOC122881976/gene-mmp9/gene-plat/gene-podn/gene-si:ch211-278a6.1/gene-si:ch211-286b5.4	14
BP	GO:0008652	cellular amino acid biosynthetic process	8/646	43/11595	0.00227429962087567	0.115643135699732	gene-LOC122876938/gene-psat1/gene-glulb/gene-phgdh/gene-asns/gene-oat/gene-aldh18a1/gene-cbsa	8	aldh18a1/asns/cbsa/glulb/LOC122876938/oat/phgdh/psat1	7	gene-aldh18a1/gene-asns/gene-cbsa/gene-LOC122876938/gene-oat/gene-phgdh/gene-psat1	1
BP	GO:0009064	glutamine family amino acid metabolic process	8/646	43/11595	0.00227429962087567	0.115643135699732	gene-hal/gene-ddah1/gene-glulb/gene-gfpt2/gene-arg2/gene-asns/gene-oat/gene-aldh18a1	8	aldh18a1/arg2/asns/ddah1/gfpt2/glulb/hal/oat	6	gene-aldh18a1/gene-arg2/gene-asns/gene-gfpt2/gene-hal/gene-oat	2
BP	GO:0002062	chondrocyte differentiation	4/646	11/11595	0.00229913167453426	0.115643135699732	gene-sulf2a/gene-rflna/gene-rflnb/gene-snai2	4	rflna/rflnb/snai2/sulf2a	1	gene-sulf2a	3
BP	GO:0048668	collateral sprouting	4/646	11/11595	0.00229913167453426	0.115643135699732	gene-omgb/gene-znf296/gene-spartb/gene-pard6gb	4	omgb/pard6gb/spartb/znf296	2	gene-omgb/gene-spartb	2
BP	GO:0006952	defense response	30/646	311/11595	0.00235320334272711	0.115643135699732	gene-tusc2a/gene-tlr3/gene-LOC122873767/gene-cxcl12b/gene-metrnlb/gene-nlrc5/gene-LOC122876711/gene-LOC122878212/gene-LOC122877917/gene-ptx3a/gene-csf1ra/gene-LOC122881737/gene-LOC122881776/gene-LOC122881975/gene-LOC122881976/gene-LOC122883385/gene-LOC122884604/gene-ifih1/gene-rsad2/gene-LOC122868174/gene-ch25h/gene-LOC122868841/gene-nupr1b/gene-ifi35/gene-dhx58/gene-LOC122868714/gene-LOC12286924…	30	bcl6b/ch25h/csf1ra/cxcl12b/dhx58/dram1/ifi35/ifih1/LOC122868174/LOC122868714/LOC122868841/LOC122869242/LOC122872132/LOC122873767/LOC122876711/LOC122877917/LOC122878212/LOC122881737/LOC122881776/LOC122881975/LOC122881976/LOC122883385/LOC122884604/metrnlb/nlrc5/nupr1b/ptx3a/rsad2/tlr3/tusc2a	25	gene-bcl6b/gene-ch25h/gene-csf1ra/gene-dhx58/gene-dram1/gene-ifi35/gene-ifih1/gene-LOC122868174/gene-LOC122868841/gene-LOC122869242/gene-LOC122873767/gene-LOC122876711/gene-LOC122877917/gene-LOC122878212/gene-LOC122881776/gene-LOC122881975/gene-LOC122881976/gene-LOC122883385/gene-LOC122884604/gene-metrnlb/gene-nlrc5/gene-nupr1b/gene-ptx3a/gene-rsad2/gene-tusc2a	5
BP	GO:0006029	proteoglycan metabolic process	5/646	18/11595	0.00246690080750473	0.117863038580782	gene-sulf2a/gene-ndnf/gene-gpc4/gene-LOC122863823/gene-dcn	5	dcn/gpc4/LOC122863823/ndnf/sulf2a	2	gene-dcn/gene-sulf2a	3
BP	GO:1901605	alpha-amino acid metabolic process	13/646	97/11595	0.0027322377930729	0.121823413210937	gene-hal/gene-LOC122876127/gene-LOC122876938/gene-psat1/gene-ddah1/gene-glulb/gene-gfpt2/gene-phgdh/gene-arg2/gene-asns/gene-oat/gene-aldh18a1/gene-cbsa	13	aldh18a1/arg2/asns/cbsa/ddah1/gfpt2/glulb/hal/LOC122876127/LOC122876938/oat/phgdh/psat1	11	gene-aldh18a1/gene-arg2/gene-asns/gene-cbsa/gene-gfpt2/gene-hal/gene-LOC122876127/gene-LOC122876938/gene-oat/gene-phgdh/gene-psat1	2
BP	GO:0051607	defense response to virus	7/646	35/11595	0.00276227506699218	0.121823413210937	gene-tlr3/gene-LOC122878212/gene-ifih1/gene-rsad2/gene-LOC122868174/gene-ch25h/gene-dhx58	7	ch25h/dhx58/ifih1/LOC122868174/LOC122878212/rsad2/tlr3	6	gene-ch25h/gene-dhx58/gene-ifih1/gene-LOC122868174/gene-LOC122878212/gene-rsad2	1
BP	GO:0140546	defense response to symbiont	7/646	35/11595	0.00276227506699218	0.121823413210937	gene-tlr3/gene-LOC122878212/gene-ifih1/gene-rsad2/gene-LOC122868174/gene-ch25h/gene-dhx58	7	ch25h/dhx58/ifih1/LOC122868174/LOC122878212/rsad2/tlr3	6	gene-ch25h/gene-dhx58/gene-ifih1/gene-LOC122868174/gene-LOC122878212/gene-rsad2	1
BP	GO:1901701	cellular response to oxygen-containing compound	14/646	109/11595	0.00285650248725141	0.122829606951811	gene-LOC122864683/gene-nptx1l/gene-LOC122878127/gene-LOC122877917/gene-pid1/gene-irs2b/gene-snai2/gene-cmpk2/gene-tnca/gene-LOC122865952/gene-baiap2l1a/gene-LOC122868820/gene-cbx8a/gene-si:ch73-335l21.1	14	baiap2l1a/cbx8a/cmpk2/irs2b/LOC122864683/LOC122865952/LOC122868820/LOC122877917/LOC122878127/nptx1l/pid1/si:ch73-335l21.1/snai2/tnca	6	gene-baiap2l1a/gene-cmpk2/gene-LOC122864683/gene-LOC122877917/gene-LOC122878127/gene-nptx1l	8
BP	GO:0001763	morphogenesis of a branching structure	4/646	12/11595	0.00329793876527185	0.136795201653273	gene-vegfc/gene-znf296/gene-snai2/gene-tnca	4	snai2/tnca/vegfc/znf296	0	-	4
BP	GO:0031589	cell-substrate adhesion	10/646	66/11595	0.0033498478571658	0.136795201653273	gene-itgb6/gene-lamb3/gene-LOC122872091/gene-parvb/gene-LOC122874995/gene-LOC122878127/gene-ndnf/gene-itgb2/gene-phldb2b/gene-si:ch211-278a6.1	10	itgb2/itgb6/lamb3/LOC122872091/LOC122874995/LOC122878127/ndnf/parvb/phldb2b/si:ch211-278a6.1	7	gene-itgb2/gene-itgb6/gene-lamb3/gene-LOC122874995/gene-LOC122878127/gene-parvb/gene-si:ch211-278a6.1	3
BP	GO:0010033	response to organic substance	41/646	475/11595	0.00341988004133183	0.136795201653273	gene-smad3a/gene-LOC122863684/gene-fgf7/gene-pmepa1/gene-LOC122864683/gene-sulf2a/gene-tlr3/gene-cxcl12b/gene-nptx1l/gene-vegfc/gene-smad6b/gene-LOC122878212/gene-LOC122878127/gene-ndnf/gene-LOC122877917/gene-pid1/gene-spartb/gene-csf1ra/gene-LOC122881519/gene-sfrp5/gene-irs2b/gene-snai2/gene-smad9/gene-LOC122888753/gene-id2a/gene-cmpk2/gene-paqr8/gene-sp8a/gene-tnca/gene-LOC122865952/gene-smad7/…	41	baiap2l1a/bambia/cmpk2/csf1ra/cxcl12b/dok6/fgf7/id2a/irs2b/LOC122863684/LOC122864683/LOC122865952/LOC122868174/LOC122868820/LOC122869242/LOC122871826/LOC122877917/LOC122878127/LOC122878212/LOC122881519/LOC122888753/ndnf/nog2/nptx1l/paqr8/pid1/pmepa1/sfrp5/si:ch73-335l21.1/smad3a/smad6b/smad7/smad9/snai2/sp8a/spartb/sulf2a/tlr3/tnca/vegfc/wbp2	17	gene-baiap2l1a/gene-cmpk2/gene-csf1ra/gene-dok6/gene-LOC122864683/gene-LOC122868174/gene-LOC122869242/gene-LOC122877917/gene-LOC122878127/gene-LOC122878212/gene-LOC122881519/gene-LOC122888753/gene-nptx1l/gene-paqr8/gene-spartb/gene-sulf2a/gene-wbp2	24
BP	GO:0034329	cell junction assembly	8/646	46/11595	0.00353366230828748	0.138134072051238	gene-LOC122872091/gene-nptx1l/gene-pclob/gene-LOC122878127/gene-snai2/gene-phldb2b/gene-si:ch211-198m17.1/gene-LOC122869537	8	LOC122869537/LOC122872091/LOC122878127/nptx1l/pclob/phldb2b/si:ch211-198m17.1/snai2	4	gene-LOC122869537/gene-LOC122878127/gene-nptx1l/gene-pclob	4
BP	GO:0045595	regulation of cell differentiation	22/646	213/11595	0.00382271106142743	0.1434950660076	gene-metrnlb/gene-LOC122874995/gene-rflna/gene-brinp3a.2/gene-LOC122878127/gene-LOC122877917/gene-rflnb/gene-znf296/gene-spartb/gene-zbtb46/gene-snai2/gene-LOC122887176/gene-LOC122888126/gene-id2a/gene-tdrd6/gene-nfkbiaa/gene-phldb2b/gene-boc/gene-nog2/gene-LOC122868714/gene-bcl6b/gene-lrrc17	22	bcl6b/boc/brinp3a.2/id2a/LOC122868714/LOC122874995/LOC122877917/LOC122878127/LOC122887176/LOC122888126/lrrc17/metrnlb/nfkbiaa/nog2/phldb2b/rflna/rflnb/snai2/spartb/tdrd6/zbtb46/znf296	8	gene-bcl6b/gene-LOC122874995/gene-LOC122877917/gene-LOC122878127/gene-metrnlb/gene-nfkbiaa/gene-spartb/gene-tdrd6	14
BP	GO:0090101	negative regulation of transmembrane receptor protein serine/threonine kinase signaling pathway	6/646	28/11595	0.00383765874206373	0.1434950660076	gene-pmepa1/gene-spartb/gene-dact2/gene-bambia/gene-nog2/gene-LOC122871826	6	bambia/dact2/LOC122871826/nog2/pmepa1/spartb	1	gene-spartb	5
BP	GO:0040011	locomotion	36/646	410/11595	0.00449476256574853	0.16069992112553	gene-cebpa/gene-swap70a/gene-LOC122875528/gene-gas8/gene-snai1a/gene-lamb3/gene-LOC122873669/gene-LOC122873767/gene-si:ch211-286b5.4/gene-vegfc/gene-carmil2/gene-reln/gene-plat/gene-emb/gene-LOC122877630/gene-LOC122878127/gene-ndnf/gene-amotl2a/gene-podn/gene-LOC122877917/gene-gpc4/gene-myot/gene-LOC122881975/gene-LOC122881976/gene-mmp9/gene-LOC122885641/gene-snai2/gene-LOC122888546/gene-phldb2b/…	36	amotl2a/boc/carmil2/cebpa/dpysl4/emb/fzd2/gas8/gpc4/lamb3/LOC122871413/LOC122873669/LOC122873767/LOC122875528/LOC122877630/LOC122877917/LOC122878127/LOC122881975/LOC122881976/LOC122885641/LOC122888546/mmp9/mrtfbb/myot/ndnf/phldb2b/plat/podn/reln/si:ch211-278a6.1/si:ch211-286b5.4/snai1a/snai2/swap70a/tafa5a/vegfc	20	gene-carmil2/gene-cebpa/gene-dpysl4/gene-emb/gene-lamb3/gene-LOC122871413/gene-LOC122873767/gene-LOC122875528/gene-LOC122877630/gene-LOC122877917/gene-LOC122878127/gene-LOC122881975/gene-LOC122881976/gene-LOC122885641/gene-mmp9/gene-myot/gene-plat/gene-podn/gene-si:ch211-278a6.1/gene-si:ch211-286b5.4	16
BP	GO:0007043	cell-cell junction assembly	4/646	13/11595	0.00455586830336042	0.16069992112553	gene-LOC122872091/gene-snai2/gene-si:ch211-198m17.1/gene-LOC122869537	4	LOC122869537/LOC122872091/si:ch211-198m17.1/snai2	1	gene-LOC122869537	3
BP	GO:0051216	cartilage development	10/646	69/11595	0.00464978214225664	0.16069992112553	gene-skib/gene-sulf2a/gene-rflna/gene-rflnb/gene-gpc4/gene-LOC122881519/gene-snai2/gene-tgfb3/gene-nog2/gene-dcn	10	dcn/gpc4/LOC122881519/nog2/rflna/rflnb/skib/snai2/sulf2a/tgfb3	3	gene-dcn/gene-LOC122881519/gene-sulf2a	7
BP	GO:0046394	carboxylic acid biosynthetic process	14/646	115/11595	0.00467150933504448	0.16069992112553	gene-LOC122876938/gene-psat1/gene-glulb/gene-scdb/gene-phgdh/gene-acaca/gene-asns/gene-LOC122866220/gene-oat/gene-scd/gene-aldh18a1/gene-fasn/gene-LOC122871599/gene-cbsa	14	acaca/aldh18a1/asns/cbsa/fasn/glulb/LOC122866220/LOC122871599/LOC122876938/oat/phgdh/psat1/scd/scdb	13	gene-acaca/gene-aldh18a1/gene-asns/gene-cbsa/gene-fasn/gene-LOC122866220/gene-LOC122871599/gene-LOC122876938/gene-oat/gene-phgdh/gene-psat1/gene-scd/gene-scdb	1
BP	GO:0016053	organic acid biosynthetic process	14/646	116/11595	0.00504915034066368	0.170285070312579	gene-LOC122876938/gene-psat1/gene-glulb/gene-scdb/gene-phgdh/gene-acaca/gene-asns/gene-LOC122866220/gene-oat/gene-scd/gene-aldh18a1/gene-fasn/gene-LOC122871599/gene-cbsa	14	acaca/aldh18a1/asns/cbsa/fasn/glulb/LOC122866220/LOC122871599/LOC122876938/oat/phgdh/psat1/scd/scdb	13	gene-acaca/gene-aldh18a1/gene-asns/gene-cbsa/gene-fasn/gene-LOC122866220/gene-LOC122871599/gene-LOC122876938/gene-oat/gene-phgdh/gene-psat1/gene-scd/gene-scdb	1
BP	GO:0090092	regulation of transmembrane receptor protein serine/threonine kinase signaling pathway	8/646	50/11595	0.00598156355310452	0.19431318360862	gene-pmepa1/gene-spartb/gene-LOC122881519/gene-dact2/gene-sfrp5/gene-bambia/gene-nog2/gene-LOC122871826	8	bambia/dact2/LOC122871826/LOC122881519/nog2/pmepa1/sfrp5/spartb	2	gene-LOC122881519/gene-spartb	6
BP	GO:0008630	intrinsic apoptotic signaling pathway in response to DNA damage	4/646	14/11595	0.00610053018306131	0.19431318360862	gene-LOC122878127/gene-LOC122881737/gene-snai2/gene-nupr1b	4	LOC122878127/LOC122881737/nupr1b/snai2	2	gene-LOC122878127/gene-nupr1b	2
BP	GO:0045600	positive regulation of fat cell differentiation	4/646	14/11595	0.00610053018306131	0.19431318360862	gene-metrnlb/gene-snai2/gene-LOC122888126/gene-LOC122868714	4	LOC122868714/LOC122888126/metrnlb/snai2	1	gene-metrnlb	3
BP	GO:0008286	insulin receptor signaling pathway	5/646	22/11595	0.00630272445793994	0.197103383048304	gene-LOC122878127/gene-pid1/gene-irs2b/gene-baiap2l1a/gene-si:ch73-335l21.1	5	baiap2l1a/irs2b/LOC122878127/pid1/si:ch73-335l21.1	2	gene-baiap2l1a/gene-LOC122878127	3
BP	GO:0061572	actin filament bundle organization	7/646	41/11595	0.00691801780869761	0.212481975552855	gene-swap70a/gene-rflna/gene-LOC122878127/gene-rflnb/gene-LOC122880325/gene-phldb2b/gene-LOC122867164	7	LOC122867164/LOC122878127/LOC122880325/phldb2b/rflna/rflnb/swap70a	2	gene-LOC122878127/gene-LOC122880325	5
BP	GO:0019752	carboxylic acid metabolic process	32/646	366/11595	0.00760107394633539	0.222775441721853	gene-hal/gene-gpia/gene-LOC122876127/gene-LOC122876938/gene-gck/gene-psat1/gene-ddah1/gene-glulb/gene-aldob/gene-gfpt2/gene-aldh5a1/gene-ddc/gene-gapdhs/gene-LOC122883755/gene-scdb/gene-phgdh/gene-LOC122885939/gene-acaca/gene-arg2/gene-lpin1b/gene-asns/gene-LOC122866314/gene-enosf1/gene-LOC122866220/gene-oat/gene-scd/gene-aldh18a1/gene-fasn/gene-nupr1b/gene-LOC122871599/gene-aldh1l2/gene-cbsa	32	acaca/aldh18a1/aldh1l2/aldh5a1/aldob/arg2/asns/cbsa/ddah1/ddc/enosf1/fasn/gapdhs/gck/gfpt2/glulb/gpia/hal/LOC122866220/LOC122866314/LOC122871599/LOC122876127/LOC122876938/LOC122883755/LOC122885939/lpin1b/nupr1b/oat/phgdh/psat1/scd/scdb	30	gene-acaca/gene-aldh18a1/gene-aldh1l2/gene-aldh5a1/gene-aldob/gene-arg2/gene-asns/gene-cbsa/gene-ddc/gene-enosf1/gene-fasn/gene-gapdhs/gene-gck/gene-gfpt2/gene-gpia/gene-hal/gene-LOC122866220/gene-LOC122866314/gene-LOC122871599/gene-LOC122876127/gene-LOC122876938/gene-LOC122883755/gene-LOC122885939/gene-lpin1b/gene-nupr1b/gene-oat/gene-phgdh/gene-psat1/gene-scd/gene-scdb	2
BP	GO:0001503	ossification	8/646	52/11595	0.00760675791610806	0.222775441721853	gene-pth4/gene-tmem119a/gene-gpc4/gene-mmp9/gene-snai2/gene-tgfb3/gene-pthlha/gene-lrrc17	8	gpc4/lrrc17/mmp9/pth4/pthlha/snai2/tgfb3/tmem119a	3	gene-mmp9/gene-pth4/gene-tmem119a	5
BP	GO:0045444	fat cell differentiation	6/646	32/11595	0.00764171573348217	0.222775441721853	gene-lamb3/gene-metrnlb/gene-LOC122877917/gene-snai2/gene-LOC122888126/gene-LOC122868714	6	lamb3/LOC122868714/LOC122877917/LOC122888126/metrnlb/snai2	3	gene-lamb3/gene-LOC122877917/gene-metrnlb	3
BP	GO:0000902	cell morphogenesis	24/646	254/11595	0.00789348321040595	0.226279852031637	gene-lamb3/gene-LOC122872091/gene-nptx1l/gene-vegfc/gene-LOC122874995/gene-emb/gene-srrm4/gene-amotl2a/gene-omgb/gene-znf296/gene-spartb/gene-gpc4/gene-myot/gene-cfap410/gene-LOC122888546/gene-fryb/gene-pard6gb/gene-cap2/gene-boc/gene-dpysl4/gene-LOC122867164/gene-LOC122869123/gene-si:ch211-278a6.1/gene-LOC122869492	24	amotl2a/boc/cap2/cfap410/dpysl4/emb/fryb/gpc4/lamb3/LOC122867164/LOC122869123/LOC122869492/LOC122872091/LOC122874995/LOC122888546/myot/nptx1l/omgb/pard6gb/si:ch211-278a6.1/spartb/srrm4/vegfc/znf296	12	gene-dpysl4/gene-emb/gene-lamb3/gene-LOC122869123/gene-LOC122869492/gene-LOC122874995/gene-myot/gene-nptx1l/gene-omgb/gene-si:ch211-278a6.1/gene-spartb/gene-srrm4	12
BP	GO:0043436	oxoacid metabolic process	32/646	370/11595	0.00886046214218044	0.247189547469141	gene-hal/gene-gpia/gene-LOC122876127/gene-LOC122876938/gene-gck/gene-psat1/gene-ddah1/gene-glulb/gene-aldob/gene-gfpt2/gene-aldh5a1/gene-ddc/gene-gapdhs/gene-LOC122883755/gene-scdb/gene-phgdh/gene-LOC122885939/gene-acaca/gene-arg2/gene-lpin1b/gene-asns/gene-LOC122866314/gene-enosf1/gene-LOC122866220/gene-oat/gene-scd/gene-aldh18a1/gene-fasn/gene-nupr1b/gene-LOC122871599/gene-aldh1l2/gene-cbsa	32	acaca/aldh18a1/aldh1l2/aldh5a1/aldob/arg2/asns/cbsa/ddah1/ddc/enosf1/fasn/gapdhs/gck/gfpt2/glulb/gpia/hal/LOC122866220/LOC122866314/LOC122871599/LOC122876127/LOC122876938/LOC122883755/LOC122885939/lpin1b/nupr1b/oat/phgdh/psat1/scd/scdb	30	gene-acaca/gene-aldh18a1/gene-aldh1l2/gene-aldh5a1/gene-aldob/gene-arg2/gene-asns/gene-cbsa/gene-ddc/gene-enosf1/gene-fasn/gene-gapdhs/gene-gck/gene-gfpt2/gene-gpia/gene-hal/gene-LOC122866220/gene-LOC122866314/gene-LOC122871599/gene-LOC122876127/gene-LOC122876938/gene-LOC122883755/gene-LOC122885939/gene-lpin1b/gene-nupr1b/gene-oat/gene-phgdh/gene-psat1/gene-scd/gene-scdb	2
BP	GO:0007163	establishment or maintenance of cell polarity	6/646	33/11595	0.00891032089714344	0.247189547469141	gene-LOC122875528/gene-carmil2/gene-LOC122877630/gene-gpc4/gene-pard6gb/gene-sapcd1	6	carmil2/gpc4/LOC122875528/LOC122877630/pard6gb/sapcd1	4	gene-carmil2/gene-LOC122875528/gene-LOC122877630/gene-sapcd1	2
BP	GO:0032870	cellular response to hormone stimulus	9/646	65/11595	0.00954475677619192	0.258433842273605	gene-LOC122864683/gene-LOC122878127/gene-pid1/gene-irs2b/gene-tnca/gene-LOC122865952/gene-baiap2l1a/gene-wbp2/gene-si:ch73-335l21.1	9	baiap2l1a/irs2b/LOC122864683/LOC122865952/LOC122878127/pid1/si:ch73-335l21.1/tnca/wbp2	4	gene-baiap2l1a/gene-LOC122864683/gene-LOC122878127/gene-wbp2	5
BP	GO:0034446	substrate adhesion-dependent cell spreading	4/646	16/11595	0.0101499812975117	0.258433842273605	gene-lamb3/gene-LOC122872091/gene-LOC122874995/gene-si:ch211-278a6.1	4	lamb3/LOC122872091/LOC122874995/si:ch211-278a6.1	3	gene-lamb3/gene-LOC122874995/gene-si:ch211-278a6.1	1
BP	GO:0050770	regulation of axonogenesis	4/646	16/11595	0.0101499812975117	0.258433842273605	gene-omgb/gene-znf296/gene-spartb/gene-pard6gb	4	omgb/pard6gb/spartb/znf296	2	gene-omgb/gene-spartb	2
BP	GO:1901653	cellular response to peptide	7/646	44/11595	0.0102128412527507	0.258433842273605	gene-LOC122864683/gene-LOC122878127/gene-LOC122877917/gene-pid1/gene-irs2b/gene-baiap2l1a/gene-si:ch73-335l21.1	7	baiap2l1a/irs2b/LOC122864683/LOC122877917/LOC122878127/pid1/si:ch73-335l21.1	4	gene-baiap2l1a/gene-LOC122864683/gene-LOC122877917/gene-LOC122878127	3
BP	GO:0007267	cell-cell signaling	30/646	345/11595	0.010279806994032	0.258433842273605	gene-LOC122876750/gene-sulf2a/gene-wnt4/gene-nptx1l/gene-syt12/gene-LOC122874938/gene-gck/gene-plpp3/gene-nlgn1/gene-LOC122877917/gene-LOC122881246/gene-sv2a/gene-LOC122882364/gene-dact2/gene-sfrp5/gene-LOC122884881/gene-wnt6b/gene-tmem198a/gene-snai2/gene-tmem88a/gene-tnca/gene-LOC122866188/gene-bambia/gene-LOC122869123/gene-fzd2/gene-wnt5b/gene-wnt7ba/gene-LOC122871213/gene-caprin2/gene-LOC1228…	30	bambia/caprin2/dact2/fzd2/gck/LOC122866188/LOC122869123/LOC122871213/LOC122871823/LOC122874938/LOC122876750/LOC122877917/LOC122881246/LOC122882364/LOC122884881/nlgn1/nptx1l/plpp3/sfrp5/snai2/sulf2a/sv2a/syt12/tmem198a/tmem88a/tnca/wnt4/wnt5b/wnt6b/wnt7ba	15	gene-caprin2/gene-gck/gene-LOC122866188/gene-LOC122869123/gene-LOC122876750/gene-LOC122877917/gene-LOC122882364/gene-nlgn1/gene-nptx1l/gene-sulf2a/gene-sv2a/gene-syt12/gene-tmem198a/gene-wnt6b/gene-wnt7ba	15
BP	GO:0061448	connective tissue development	11/646	89/11595	0.0102838911154369	0.258433842273605	gene-skib/gene-sulf2a/gene-rflna/gene-rflnb/gene-spartb/gene-gpc4/gene-LOC122881519/gene-snai2/gene-tgfb3/gene-nog2/gene-dcn	11	dcn/gpc4/LOC122881519/nog2/rflna/rflnb/skib/snai2/spartb/sulf2a/tgfb3	4	gene-dcn/gene-LOC122881519/gene-spartb/gene-sulf2a	7
BP	GO:0007169	transmembrane receptor protein tyrosine kinase signaling pathway	18/646	178/11595	0.0103674041377202	0.258433842273605	gene-fgf7/gene-sulf2a/gene-mst1rb/gene-vegfc/gene-wdr54/gene-LOC122878127/gene-pid1/gene-kdrl/gene-csf1ra/gene-irs2b/gene-LOC122887564/gene-LOC122888753/gene-efna1a/gene-sp8a/gene-LOC122865520/gene-dok6/gene-baiap2l1a/gene-si:ch73-335l21.1	18	baiap2l1a/csf1ra/dok6/efna1a/fgf7/irs2b/kdrl/LOC122865520/LOC122878127/LOC122887564/LOC122888753/mst1rb/pid1/si:ch73-335l21.1/sp8a/sulf2a/vegfc/wdr54	7	gene-baiap2l1a/gene-csf1ra/gene-dok6/gene-efna1a/gene-LOC122878127/gene-LOC122888753/gene-sulf2a	11
BP	GO:0051094	positive regulation of developmental process	15/646	139/11595	0.0105189268663037	0.258465060143462	gene-metrnlb/gene-LOC122874995/gene-brinp3a.2/gene-LOC122878127/gene-LOC122877917/gene-znf296/gene-zbtb46/gene-snai2/gene-LOC122887176/gene-LOC122888126/gene-phldb2b/gene-boc/gene-mrtfbb/gene-LOC122868714/gene-caprin2	15	boc/brinp3a.2/caprin2/LOC122868714/LOC122874995/LOC122877917/LOC122878127/LOC122887176/LOC122888126/metrnlb/mrtfbb/phldb2b/snai2/zbtb46/znf296	5	gene-caprin2/gene-LOC122874995/gene-LOC122877917/gene-LOC122878127/gene-metrnlb	10
BP	GO:0002573	myeloid leukocyte differentiation	5/646	25/11595	0.011078817396239	0.26838825241593	gene-cebpa/gene-alas1/gene-LOC122878127/gene-zbtb46/gene-lrrc17	5	alas1/cebpa/LOC122878127/lrrc17/zbtb46	3	gene-alas1/gene-cebpa/gene-LOC122878127	2
BP	GO:0007015	actin filament organization	18/646	180/11595	0.0115575492440514	0.276097009719005	gene-swap70a/gene-LOC122885147/gene-LOC122872091/gene-LOC122873669/gene-rflna/gene-LOC122878127/gene-rflnb/gene-LOC122879509/gene-LOC122880325/gene-tmod4/gene-fmn2a/gene-LOC122861414/gene-fmn1/gene-phldb2b/gene-baiap2l1a/gene-LOC122867164/gene-LOC122869123/gene-LOC122871423	18	baiap2l1a/fmn1/fmn2a/LOC122861414/LOC122867164/LOC122869123/LOC122871423/LOC122872091/LOC122873669/LOC122878127/LOC122879509/LOC122880325/LOC122885147/phldb2b/rflna/rflnb/swap70a/tmod4	10	gene-baiap2l1a/gene-fmn1/gene-LOC122861414/gene-LOC122869123/gene-LOC122871423/gene-LOC122878127/gene-LOC122879509/gene-LOC122880325/gene-LOC122885147/gene-tmod4	8
BP	GO:0071375	cellular response to peptide hormone stimulus	6/646	35/11595	0.0118869270541335	0.276940543434885	gene-LOC122864683/gene-LOC122878127/gene-pid1/gene-irs2b/gene-baiap2l1a/gene-si:ch73-335l21.1	6	baiap2l1a/irs2b/LOC122864683/LOC122878127/pid1/si:ch73-335l21.1	3	gene-baiap2l1a/gene-LOC122864683/gene-LOC122878127	3
BP	GO:0035295	tube development	28/646	320/11595	0.0119148838454543	0.276940543434885	gene-skib/gene-LOC122870658/gene-vegfc/gene-angptl2b/gene-LOC122877908/gene-amotl2a/gene-nlgn1/gene-LOC122877917/gene-kdrl/gene-LOC122881975/gene-LOC122881976/gene-vegfaa/gene-angptl4/gene-LOC122887564/gene-LOC122888062/gene-LOC122888753/gene-vegfab/gene-pard6gb/gene-tnca/gene-LOC122865452/gene-LOC122866402/gene-LOC122869378/gene-fzd2/gene-mrtfbb/gene-hspa12b/gene-cacna1c/gene-tafa5a/gene-rcan1b	28	amotl2a/angptl2b/angptl4/cacna1c/fzd2/hspa12b/kdrl/LOC122865452/LOC122866402/LOC122869378/LOC122870658/LOC122877908/LOC122877917/LOC122881975/LOC122881976/LOC122887564/LOC122888062/LOC122888753/mrtfbb/nlgn1/pard6gb/rcan1b/skib/tafa5a/tnca/vegfaa/vegfab/vegfc	14	gene-hspa12b/gene-LOC122866402/gene-LOC122869378/gene-LOC122870658/gene-LOC122877908/gene-LOC122877917/gene-LOC122881975/gene-LOC122881976/gene-LOC122888062/gene-LOC122888753/gene-nlgn1/gene-rcan1b/gene-vegfaa/gene-vegfab	14
BP	GO:0006520	cellular amino acid metabolic process	17/646	168/11595	0.0124341213761575	0.28366210378369	gene-hal/gene-LOC122876127/gene-LOC122876938/gene-psat1/gene-ddah1/gene-glulb/gene-gfpt2/gene-aldh5a1/gene-ddc/gene-phgdh/gene-arg2/gene-asns/gene-LOC122866314/gene-enosf1/gene-oat/gene-aldh18a1/gene-cbsa	17	aldh18a1/aldh5a1/arg2/asns/cbsa/ddah1/ddc/enosf1/gfpt2/glulb/hal/LOC122866314/LOC122876127/LOC122876938/oat/phgdh/psat1	15	gene-aldh18a1/gene-aldh5a1/gene-arg2/gene-asns/gene-cbsa/gene-ddc/gene-enosf1/gene-gfpt2/gene-hal/gene-LOC122866314/gene-LOC122876127/gene-LOC122876938/gene-oat/gene-phgdh/gene-psat1	2
BP	GO:0032101	regulation of response to external stimulus	16/646	155/11595	0.0125970131528649	0.28366210378369	gene-grk1a/gene-swap70a/gene-tlr3/gene-metrnlb/gene-LOC122878212/gene-LOC122877917/gene-omgb/gene-snai2/gene-LOC122865952/gene-phldb2b/gene-nupr1b/gene-ifi35/gene-LOC122868714/gene-LOC122869242/gene-bcl6b/gene-tafa5a	16	bcl6b/grk1a/ifi35/LOC122865952/LOC122868714/LOC122869242/LOC122877917/LOC122878212/metrnlb/nupr1b/omgb/phldb2b/snai2/swap70a/tafa5a/tlr3	9	gene-bcl6b/gene-grk1a/gene-ifi35/gene-LOC122869242/gene-LOC122877917/gene-LOC122878212/gene-metrnlb/gene-nupr1b/gene-omgb	7
BP	GO:0072593	reactive oxygen species metabolic process	4/646	17/11595	0.0126988267391535	0.28366210378369	gene-tusc2a/gene-cusr/gene-ddah1/gene-LOC122877917	4	cusr/ddah1/LOC122877917/tusc2a	2	gene-LOC122877917/gene-tusc2a	2
BP	GO:0030099	myeloid cell differentiation	10/646	80/11595	0.013053026039666	0.287835958823405	gene-cebpa/gene-alas1/gene-trim2a/gene-LOC122878127/gene-zbtb46/gene-tmem88a/gene-kdm6bb/gene-flvcr1/gene-LOC122869123/gene-lrrc17	10	alas1/cebpa/flvcr1/kdm6bb/LOC122869123/LOC122878127/lrrc17/tmem88a/trim2a/zbtb46	5	gene-alas1/gene-cebpa/gene-flvcr1/gene-LOC122869123/gene-LOC122878127	5
BP	GO:0044283	small molecule biosynthetic process	22/646	238/11595	0.0135577502584216	0.295181398031457	gene-dut/gene-LOC122872164/gene-gpia/gene-LOC122876938/gene-psat1/gene-pde4ba/gene-glulb/gene-itpkcb/gene-nme5/gene-scdb/gene-phgdh/gene-snai2/gene-acaca/gene-asns/gene-pck2/gene-LOC122866220/gene-oat/gene-scd/gene-aldh18a1/gene-fasn/gene-LOC122871599/gene-cbsa	22	acaca/aldh18a1/asns/cbsa/dut/fasn/glulb/gpia/itpkcb/LOC122866220/LOC122871599/LOC122872164/LOC122876938/nme5/oat/pck2/pde4ba/phgdh/psat1/scd/scdb/snai2	17	gene-acaca/gene-aldh18a1/gene-asns/gene-cbsa/gene-fasn/gene-gpia/gene-LOC122866220/gene-LOC122871599/gene-LOC122872164/gene-LOC122876938/gene-nme5/gene-oat/gene-pck2/gene-phgdh/gene-psat1/gene-scd/gene-scdb	5
BP	GO:0009607	response to biotic stimulus	24/646	267/11595	0.014076778994964	0.297342035880268	gene-tusc2a/gene-tlr3/gene-nlrc5/gene-LOC122878212/gene-LOC122878108/gene-LOC122878107/gene-LOC122877917/gene-ptx3a/gene-LOC122881737/gene-LOC122881776/gene-wdfy4/gene-ifih1/gene-rsad2/gene-cmpk2/gene-nfkbiaa/gene-LOC122868174/gene-ch25h/gene-LOC122868841/gene-ifi35/gene-dhx58/gene-LOC122868820/gene-LOC122869242/gene-LOC122870587/gene-dram1	24	ch25h/cmpk2/dhx58/dram1/ifi35/ifih1/LOC122868174/LOC122868820/LOC122868841/LOC122869242/LOC122870587/LOC122877917/LOC122878107/LOC122878108/LOC122878212/LOC122881737/LOC122881776/nfkbiaa/nlrc5/ptx3a/rsad2/tlr3/tusc2a/wdfy4	21	gene-ch25h/gene-cmpk2/gene-dhx58/gene-dram1/gene-ifi35/gene-ifih1/gene-LOC122868174/gene-LOC122868841/gene-LOC122869242/gene-LOC122870587/gene-LOC122877917/gene-LOC122878107/gene-LOC122878108/gene-LOC122878212/gene-LOC122881776/gene-nfkbiaa/gene-nlrc5/gene-ptx3a/gene-rsad2/gene-tusc2a/gene-wdfy4	3
BP	GO:0050808	synapse organization	10/646	81/11595	0.0141743639568961	0.297342035880268	gene-nptx1l/gene-pclob/gene-ppfibp2b/gene-LOC122878127/gene-nlgn1/gene-cnksr1/gene-LOC122863118/gene-tnca/gene-si:ch211-278a6.1/gene-pdzrn4	10	cnksr1/LOC122863118/LOC122878127/nlgn1/nptx1l/pclob/pdzrn4/ppfibp2b/si:ch211-278a6.1/tnca	6	gene-LOC122863118/gene-LOC122878127/gene-nlgn1/gene-nptx1l/gene-pclob/gene-si:ch211-278a6.1	4
BP	GO:0016055	Wnt signaling pathway	18/646	184/11595	0.0142616593495741	0.297342035880268	gene-sulf2a/gene-wnt4/gene-LOC122874938/gene-plpp3/gene-LOC122877917/gene-dact2/gene-sfrp5/gene-LOC122884881/gene-wnt6b/gene-tmem198a/gene-snai2/gene-tmem88a/gene-LOC122866188/gene-bambia/gene-fzd2/gene-wnt5b/gene-wnt7ba/gene-caprin2	18	bambia/caprin2/dact2/fzd2/LOC122866188/LOC122874938/LOC122877917/LOC122884881/plpp3/sfrp5/snai2/sulf2a/tmem198a/tmem88a/wnt4/wnt5b/wnt6b/wnt7ba	7	gene-caprin2/gene-LOC122866188/gene-LOC122877917/gene-sulf2a/gene-tmem198a/gene-wnt6b/gene-wnt7ba	11
BP	GO:0006006	glucose metabolic process	7/646	47/11595	0.0145237247968965	0.297342035880268	gene-h6pd/gene-gpia/gene-LOC122878127/gene-insb/gene-gapdhs/gene-LOC122883245/gene-pck2	7	gapdhs/gpia/h6pd/insb/LOC122878127/LOC122883245/pck2	7	gene-gapdhs/gene-gpia/gene-h6pd/gene-insb/gene-LOC122878127/gene-LOC122883245/gene-pck2	0
BP	GO:0198738	cell-cell signaling by wnt	18/646	185/11595	0.0150096637597966	0.297342035880268	gene-sulf2a/gene-wnt4/gene-LOC122874938/gene-plpp3/gene-LOC122877917/gene-dact2/gene-sfrp5/gene-LOC122884881/gene-wnt6b/gene-tmem198a/gene-snai2/gene-tmem88a/gene-LOC122866188/gene-bambia/gene-fzd2/gene-wnt5b/gene-wnt7ba/gene-caprin2	18	bambia/caprin2/dact2/fzd2/LOC122866188/LOC122874938/LOC122877917/LOC122884881/plpp3/sfrp5/snai2/sulf2a/tmem198a/tmem88a/wnt4/wnt5b/wnt6b/wnt7ba	7	gene-caprin2/gene-LOC122866188/gene-LOC122877917/gene-sulf2a/gene-tmem198a/gene-wnt6b/gene-wnt7ba	11
BP	GO:0045597	positive regulation of cell differentiation	11/646	94/11595	0.0151599293412136	0.297342035880268	gene-metrnlb/gene-LOC122874995/gene-brinp3a.2/gene-LOC122878127/gene-znf296/gene-zbtb46/gene-snai2/gene-LOC122887176/gene-LOC122888126/gene-boc/gene-LOC122868714	11	boc/brinp3a.2/LOC122868714/LOC122874995/LOC122878127/LOC122887176/LOC122888126/metrnlb/snai2/zbtb46/znf296	3	gene-LOC122874995/gene-LOC122878127/gene-metrnlb	8
BP	GO:0002762	negative regulation of myeloid leukocyte differentiation	3/646	10/11595	0.0153857216240371	0.297342035880268	gene-LOC122878127/gene-zbtb46/gene-lrrc17	3	LOC122878127/lrrc17/zbtb46	1	gene-LOC122878127	2
BP	GO:0030851	granulocyte differentiation	3/646	10/11595	0.0153857216240371	0.297342035880268	gene-cebpa/gene-alas1/gene-zbtb46	3	alas1/cebpa/zbtb46	2	gene-alas1/gene-cebpa	1
BP	GO:0046626	regulation of insulin receptor signaling pathway	3/646	10/11595	0.0153857216240371	0.297342035880268	gene-LOC122878127/gene-pid1/gene-baiap2l1a	3	baiap2l1a/LOC122878127/pid1	2	gene-baiap2l1a/gene-LOC122878127	1
BP	GO:0050729	positive regulation of inflammatory response	3/646	10/11595	0.0153857216240371	0.297342035880268	gene-tlr3/gene-nupr1b/gene-ifi35	3	ifi35/nupr1b/tlr3	2	gene-ifi35/gene-nupr1b	1
BP	GO:0006082	organic acid metabolic process	32/646	386/11595	0.0157363333263099	0.300738814680589	gene-hal/gene-gpia/gene-LOC122876127/gene-LOC122876938/gene-gck/gene-psat1/gene-ddah1/gene-glulb/gene-aldob/gene-gfpt2/gene-aldh5a1/gene-ddc/gene-gapdhs/gene-LOC122883755/gene-scdb/gene-phgdh/gene-LOC122885939/gene-acaca/gene-arg2/gene-lpin1b/gene-asns/gene-LOC122866314/gene-enosf1/gene-LOC122866220/gene-oat/gene-scd/gene-aldh18a1/gene-fasn/gene-nupr1b/gene-LOC122871599/gene-aldh1l2/gene-cbsa	32	acaca/aldh18a1/aldh1l2/aldh5a1/aldob/arg2/asns/cbsa/ddah1/ddc/enosf1/fasn/gapdhs/gck/gfpt2/glulb/gpia/hal/LOC122866220/LOC122866314/LOC122871599/LOC122876127/LOC122876938/LOC122883755/LOC122885939/lpin1b/nupr1b/oat/phgdh/psat1/scd/scdb	30	gene-acaca/gene-aldh18a1/gene-aldh1l2/gene-aldh5a1/gene-aldob/gene-arg2/gene-asns/gene-cbsa/gene-ddc/gene-enosf1/gene-fasn/gene-gapdhs/gene-gck/gene-gfpt2/gene-gpia/gene-hal/gene-LOC122866220/gene-LOC122866314/gene-LOC122871599/gene-LOC122876127/gene-LOC122876938/gene-LOC122883755/gene-LOC122885939/gene-lpin1b/gene-nupr1b/gene-oat/gene-phgdh/gene-psat1/gene-scd/gene-scdb	2
BP	GO:1901652	response to peptide	7/646	48/11595	0.0162120905617709	0.306426327101604	gene-LOC122864683/gene-LOC122878127/gene-LOC122877917/gene-pid1/gene-irs2b/gene-baiap2l1a/gene-si:ch73-335l21.1	7	baiap2l1a/irs2b/LOC122864683/LOC122877917/LOC122878127/pid1/si:ch73-335l21.1	4	gene-baiap2l1a/gene-LOC122864683/gene-LOC122877917/gene-LOC122878127	3
BP	GO:0002009	morphogenesis of an epithelium	16/646	160/11595	0.0166550322973469	0.30731823745428	gene-skib/gene-vegfc/gene-amotl2a/gene-LOC122877917/gene-gpc4/gene-sox4b/gene-snai2/gene-grhl1/gene-pard6gb/gene-tnca/gene-phldb2b/gene-fzd2/gene-dcn/gene-cacna1c/gene-sapcd1/gene-LOC122871826	16	amotl2a/cacna1c/dcn/fzd2/gpc4/grhl1/LOC122871826/LOC122877917/pard6gb/phldb2b/sapcd1/skib/snai2/sox4b/tnca/vegfc	4	gene-dcn/gene-grhl1/gene-LOC122877917/gene-sapcd1	12
BP	GO:0048729	tissue morphogenesis	18/646	188/11595	0.0174389592387107	0.30731823745428	gene-skib/gene-vegfc/gene-lrrc39/gene-amotl2a/gene-LOC122877917/gene-gpc4/gene-sox4b/gene-dact2/gene-snai2/gene-grhl1/gene-pard6gb/gene-tnca/gene-phldb2b/gene-fzd2/gene-dcn/gene-cacna1c/gene-sapcd1/gene-LOC122871826	18	amotl2a/cacna1c/dact2/dcn/fzd2/gpc4/grhl1/LOC122871826/LOC122877917/lrrc39/pard6gb/phldb2b/sapcd1/skib/snai2/sox4b/tnca/vegfc	5	gene-dcn/gene-grhl1/gene-LOC122877917/gene-lrrc39/gene-sapcd1	13
BP	GO:0043207	response to external biotic stimulus	23/646	258/11595	0.0174927393313426	0.30731823745428	gene-tusc2a/gene-tlr3/gene-nlrc5/gene-LOC122878212/gene-LOC122878108/gene-LOC122878107/gene-ptx3a/gene-LOC122881737/gene-LOC122881776/gene-wdfy4/gene-ifih1/gene-rsad2/gene-cmpk2/gene-nfkbiaa/gene-LOC122868174/gene-ch25h/gene-LOC122868841/gene-ifi35/gene-dhx58/gene-LOC122868820/gene-LOC122869242/gene-LOC122870587/gene-dram1	23	ch25h/cmpk2/dhx58/dram1/ifi35/ifih1/LOC122868174/LOC122868820/LOC122868841/LOC122869242/LOC122870587/LOC122878107/LOC122878108/LOC122878212/LOC122881737/LOC122881776/nfkbiaa/nlrc5/ptx3a/rsad2/tlr3/tusc2a/wdfy4	20	gene-ch25h/gene-cmpk2/gene-dhx58/gene-dram1/gene-ifi35/gene-ifih1/gene-LOC122868174/gene-LOC122868841/gene-LOC122869242/gene-LOC122870587/gene-LOC122878107/gene-LOC122878108/gene-LOC122878212/gene-LOC122881776/gene-nfkbiaa/gene-nlrc5/gene-ptx3a/gene-rsad2/gene-tusc2a/gene-wdfy4	3
BP	GO:0051707	response to other organism	23/646	258/11595	0.0174927393313426	0.30731823745428	gene-tusc2a/gene-tlr3/gene-nlrc5/gene-LOC122878212/gene-LOC122878108/gene-LOC122878107/gene-ptx3a/gene-LOC122881737/gene-LOC122881776/gene-wdfy4/gene-ifih1/gene-rsad2/gene-cmpk2/gene-nfkbiaa/gene-LOC122868174/gene-ch25h/gene-LOC122868841/gene-ifi35/gene-dhx58/gene-LOC122868820/gene-LOC122869242/gene-LOC122870587/gene-dram1	23	ch25h/cmpk2/dhx58/dram1/ifi35/ifih1/LOC122868174/LOC122868820/LOC122868841/LOC122869242/LOC122870587/LOC122878107/LOC122878108/LOC122878212/LOC122881737/LOC122881776/nfkbiaa/nlrc5/ptx3a/rsad2/tlr3/tusc2a/wdfy4	20	gene-ch25h/gene-cmpk2/gene-dhx58/gene-dram1/gene-ifi35/gene-ifih1/gene-LOC122868174/gene-LOC122868841/gene-LOC122869242/gene-LOC122870587/gene-LOC122878107/gene-LOC122878108/gene-LOC122878212/gene-LOC122881776/gene-nfkbiaa/gene-nlrc5/gene-ptx3a/gene-rsad2/gene-tusc2a/gene-wdfy4	3
BP	GO:0006165	nucleoside diphosphate phosphorylation	6/646	38/11595	0.0175674303145399	0.30731823745428	gene-gpia/gene-gck/gene-aldob/gene-gapdhs/gene-cmpk2/gene-nupr1b	6	aldob/cmpk2/gapdhs/gck/gpia/nupr1b	6	gene-aldob/gene-cmpk2/gene-gapdhs/gene-gck/gene-gpia/gene-nupr1b	0
BP	GO:0046939	nucleotide phosphorylation	6/646	38/11595	0.0175674303145399	0.30731823745428	gene-gpia/gene-gck/gene-aldob/gene-gapdhs/gene-cmpk2/gene-nupr1b	6	aldob/cmpk2/gapdhs/gck/gpia/nupr1b	6	gene-aldob/gene-cmpk2/gene-gapdhs/gene-gck/gene-gpia/gene-nupr1b	0
BP	GO:0071396	cellular response to lipid	6/646	38/11595	0.0175674303145399	0.30731823745428	gene-LOC122877917/gene-snai2/gene-cmpk2/gene-tnca/gene-LOC122865952/gene-LOC122868820	6	cmpk2/LOC122865952/LOC122868820/LOC122877917/snai2/tnca	2	gene-cmpk2/gene-LOC122877917	4
BP	GO:0015914	phospholipid transport	5/646	28/11595	0.0178673393868767	0.30731823745428	gene-atp8b4/gene-LOC122875390/gene-LOC122876099/gene-LOC122883087/gene-LOC122871278	5	atp8b4/LOC122871278/LOC122875390/LOC122876099/LOC122883087	5	gene-atp8b4/gene-LOC122871278/gene-LOC122875390/gene-LOC122876099/gene-LOC122883087	0
BP	GO:0097193	intrinsic apoptotic signaling pathway	5/646	28/11595	0.0178673393868767	0.30731823745428	gene-ddit3/gene-LOC122878127/gene-LOC122881737/gene-snai2/gene-nupr1b	5	ddit3/LOC122878127/LOC122881737/nupr1b/snai2	3	gene-ddit3/gene-LOC122878127/gene-nupr1b	2
BP	GO:0045598	regulation of fat cell differentiation	4/646	19/11595	0.0189357827377664	0.322470755534239	gene-metrnlb/gene-snai2/gene-LOC122888126/gene-LOC122868714	4	LOC122868714/LOC122888126/metrnlb/snai2	1	gene-metrnlb	3
BP	GO:0007162	negative regulation of cell adhesion	6/646	39/11595	0.0198141791125107	0.322550287604946	gene-swap70a/gene-LOC122878127/gene-LOC122877917/gene-snai2/gene-tnca/gene-phldb2b	6	LOC122877917/LOC122878127/phldb2b/snai2/swap70a/tnca	2	gene-LOC122877917/gene-LOC122878127	4
BP	GO:0022603	regulation of anatomical structure morphogenesis	15/646	150/11595	0.0200238995829157	0.322550287604946	gene-LOC122874995/gene-amotl2a/gene-LOC122877917/gene-omgb/gene-znf296/gene-spartb/gene-snai2/gene-cfap410/gene-pard6gb/gene-phldb2b/gene-LOC122867164/gene-si:ch211-278a6.1/gene-LOC122869492/gene-sapcd1/gene-tafa5a	15	amotl2a/cfap410/LOC122867164/LOC122869492/LOC122874995/LOC122877917/omgb/pard6gb/phldb2b/sapcd1/si:ch211-278a6.1/snai2/spartb/tafa5a/znf296	7	gene-LOC122869492/gene-LOC122874995/gene-LOC122877917/gene-omgb/gene-sapcd1/gene-si:ch211-278a6.1/gene-spartb	8
BP	GO:0007584	response to nutrient	3/646	11/11595	0.0202931928551007	0.322550287604946	gene-snai2/gene-tnca/gene-LOC122865952	3	LOC122865952/snai2/tnca	0	-	3
BP	GO:0032602	chemokine production	3/646	11/11595	0.0202931928551007	0.322550287604946	gene-tlr3/gene-LOC122877917/gene-snai2	3	LOC122877917/snai2/tlr3	1	gene-LOC122877917	2
BP	GO:0032642	regulation of chemokine production	3/646	11/11595	0.0202931928551007	0.322550287604946	gene-tlr3/gene-LOC122877917/gene-snai2	3	LOC122877917/snai2/tlr3	1	gene-LOC122877917	2
BP	GO:0048659	smooth muscle cell proliferation	3/646	11/11595	0.0202931928551007	0.322550287604946	gene-LOC122878127/gene-LOC122877917/gene-tafa5a	3	LOC122877917/LOC122878127/tafa5a	2	gene-LOC122877917/gene-LOC122878127	1
BP	GO:0048660	regulation of smooth muscle cell proliferation	3/646	11/11595	0.0202931928551007	0.322550287604946	gene-LOC122878127/gene-LOC122877917/gene-tafa5a	3	LOC122877917/LOC122878127/tafa5a	2	gene-LOC122877917/gene-LOC122878127	1
BP	GO:2000145	regulation of cell motility	13/646	124/11595	0.0205789902482913	0.322550287604946	gene-swap70a/gene-si:ch211-286b5.4/gene-LOC122878127/gene-podn/gene-LOC122877917/gene-gpc4/gene-LOC122881975/gene-LOC122881976/gene-snai2/gene-phldb2b/gene-si:ch211-278a6.1/gene-LOC122871413/gene-tafa5a	13	gpc4/LOC122871413/LOC122877917/LOC122878127/LOC122881975/LOC122881976/phldb2b/podn/si:ch211-278a6.1/si:ch211-286b5.4/snai2/swap70a/tafa5a	8	gene-LOC122871413/gene-LOC122877917/gene-LOC122878127/gene-LOC122881975/gene-LOC122881976/gene-podn/gene-si:ch211-278a6.1/gene-si:ch211-286b5.4	5
BP	GO:0032103	positive regulation of response to external stimulus	5/646	29/11595	0.0206282160677582	0.322550287604946	gene-swap70a/gene-tlr3/gene-snai2/gene-nupr1b/gene-ifi35	5	ifi35/nupr1b/snai2/swap70a/tlr3	2	gene-ifi35/gene-nupr1b	3
BP	GO:0006954	inflammatory response	16/646	165/11595	0.0216546378272299	0.335549342908428	gene-tusc2a/gene-tlr3/gene-LOC122873767/gene-metrnlb/gene-LOC122876711/gene-csf1ra/gene-LOC122881737/gene-LOC122881975/gene-LOC122881976/gene-LOC122883385/gene-nupr1b/gene-ifi35/gene-LOC122868714/gene-LOC122869242/gene-bcl6b/gene-LOC122872132	16	bcl6b/csf1ra/ifi35/LOC122868714/LOC122869242/LOC122872132/LOC122873767/LOC122876711/LOC122881737/LOC122881975/LOC122881976/LOC122883385/metrnlb/nupr1b/tlr3/tusc2a	12	gene-bcl6b/gene-csf1ra/gene-ifi35/gene-LOC122869242/gene-LOC122873767/gene-LOC122876711/gene-LOC122881975/gene-LOC122881976/gene-LOC122883385/gene-metrnlb/gene-nupr1b/gene-tusc2a	4
BP	GO:0002252	immune effector process	12/646	112/11595	0.0218804993832255	0.336021954813821	gene-swap70a/gene-tusc2a/gene-tlr3/gene-LOC122873342/gene-LOC122878212/gene-ifih1/gene-rsad2/gene-LOC122868174/gene-ch25h/gene-LOC122868841/gene-ifi35/gene-dhx58	12	ch25h/dhx58/ifi35/ifih1/LOC122868174/LOC122868841/LOC122873342/LOC122878212/rsad2/swap70a/tlr3/tusc2a	10	gene-ch25h/gene-dhx58/gene-ifi35/gene-ifih1/gene-LOC122868174/gene-LOC122868841/gene-LOC122873342/gene-LOC122878212/gene-rsad2/gene-tusc2a	2
BP	GO:0002429	immune response-activating cell surface receptor signaling pathway	4/646	20/11595	0.0226523972056789	0.338801071250154	gene-tespa1/gene-LOC122870587/gene-LOC122869735/gene-LOC122869738	4	LOC122869735/LOC122869738/LOC122870587/tespa1	3	gene-LOC122869735/gene-LOC122869738/gene-LOC122870587	1
BP	GO:0002757	immune response-activating signal transduction	4/646	20/11595	0.0226523972056789	0.338801071250154	gene-tespa1/gene-LOC122870587/gene-LOC122869735/gene-LOC122869738	4	LOC122869735/LOC122869738/LOC122870587/tespa1	3	gene-LOC122869735/gene-LOC122869738/gene-LOC122870587	1
BP	GO:0050851	antigen receptor-mediated signaling pathway	4/646	20/11595	0.0226523972056789	0.338801071250154	gene-tespa1/gene-LOC122870587/gene-LOC122869735/gene-LOC122869738	4	LOC122869735/LOC122869738/LOC122870587/tespa1	3	gene-LOC122869735/gene-LOC122869738/gene-LOC122870587	1
BP	GO:0019318	hexose metabolic process	9/646	75/11595	0.0230059669109188	0.341122957644658	gene-h6pd/gene-gpia/gene-gck/gene-LOC122878127/gene-insb/gene-gapdhs/gene-LOC122883245/gene-pck2/gene-pfkfb3	9	gapdhs/gck/gpia/h6pd/insb/LOC122878127/LOC122883245/pck2/pfkfb3	9	gene-gapdhs/gene-gck/gene-gpia/gene-h6pd/gene-insb/gene-LOC122878127/gene-LOC122883245/gene-pck2/gene-pfkfb3	0
BP	GO:1905114	cell surface receptor signaling pathway involved in cell-cell signaling	18/646	195/11595	0.0242893893779074	0.356566080991671	gene-sulf2a/gene-wnt4/gene-LOC122874938/gene-plpp3/gene-LOC122877917/gene-dact2/gene-sfrp5/gene-LOC122884881/gene-wnt6b/gene-tmem198a/gene-snai2/gene-tmem88a/gene-LOC122866188/gene-bambia/gene-fzd2/gene-wnt5b/gene-wnt7ba/gene-caprin2	18	bambia/caprin2/dact2/fzd2/LOC122866188/LOC122874938/LOC122877917/LOC122884881/plpp3/sfrp5/snai2/sulf2a/tmem198a/tmem88a/wnt4/wnt5b/wnt6b/wnt7ba	7	gene-caprin2/gene-LOC122866188/gene-LOC122877917/gene-sulf2a/gene-tmem198a/gene-wnt6b/gene-wnt7ba	11
BP	GO:0031175	neuron projection development	21/646	238/11595	0.0248538974197776	0.356566080991671	gene-LOC122872091/gene-nptx1l/gene-vegfc/gene-emb/gene-srrm4/gene-ndnf/gene-LOC122877917/gene-omgb/gene-znf296/gene-spartb/gene-myot/gene-LOC122888546/gene-pard6gb/gene-tnca/gene-boc/gene-dpysl4/gene-LOC122867164/gene-LOC122869123/gene-si:ch211-278a6.1/gene-mrtfbb/gene-LOC122870091	21	boc/dpysl4/emb/LOC122867164/LOC122869123/LOC122870091/LOC122872091/LOC122877917/LOC122888546/mrtfbb/myot/ndnf/nptx1l/omgb/pard6gb/si:ch211-278a6.1/spartb/srrm4/tnca/vegfc/znf296	11	gene-dpysl4/gene-emb/gene-LOC122869123/gene-LOC122870091/gene-LOC122877917/gene-myot/gene-nptx1l/gene-omgb/gene-si:ch211-278a6.1/gene-spartb/gene-srrm4	10
BP	GO:0043434	response to peptide hormone	6/646	41/11595	0.0248767033250003	0.356566080991671	gene-LOC122864683/gene-LOC122878127/gene-pid1/gene-irs2b/gene-baiap2l1a/gene-si:ch73-335l21.1	6	baiap2l1a/irs2b/LOC122864683/LOC122878127/pid1/si:ch73-335l21.1	3	gene-baiap2l1a/gene-LOC122864683/gene-LOC122878127	3
BP	GO:0071774	response to fibroblast growth factor	6/646	41/11595	0.0248767033250003	0.356566080991671	gene-fgf7/gene-sulf2a/gene-ndnf/gene-LOC122888753/gene-sp8a/gene-tnca	6	fgf7/LOC122888753/ndnf/sp8a/sulf2a/tnca	2	gene-LOC122888753/gene-sulf2a	4
BP	GO:0009070	serine family amino acid biosynthetic process	3/646	12/11595	0.0259582775517104	0.360066430555982	gene-psat1/gene-phgdh/gene-cbsa	3	cbsa/phgdh/psat1	3	gene-cbsa/gene-phgdh/gene-psat1	0
BP	GO:0050852	T cell receptor signaling pathway	3/646	12/11595	0.0259582775517104	0.360066430555982	gene-tespa1/gene-LOC122869735/gene-LOC122869738	3	LOC122869735/LOC122869738/tespa1	2	gene-LOC122869735/gene-LOC122869738	1
BP	GO:0050873	brown fat cell differentiation	3/646	12/11595	0.0259582775517104	0.360066430555982	gene-lamb3/gene-metrnlb/gene-LOC122868714	3	lamb3/LOC122868714/metrnlb	2	gene-lamb3/gene-metrnlb	1
BP	GO:0072523	purine-containing compound catabolic process	3/646	12/11595	0.0259582775517104	0.360066430555982	gene-LOC122872164/gene-gda/gene-pde4ba	3	gda/LOC122872164/pde4ba	2	gene-gda/gene-LOC122872164	1
BP	GO:0017015	regulation of transforming growth factor beta receptor signaling pathway	4/646	21/11595	0.0267823675756636	0.363605723934438	gene-pmepa1/gene-LOC122881519/gene-bambia/gene-LOC122871826	4	bambia/LOC122871826/LOC122881519/pmepa1	1	gene-LOC122881519	3
BP	GO:1903844	regulation of cellular response to transforming growth factor beta stimulus	4/646	21/11595	0.0267823675756636	0.363605723934438	gene-pmepa1/gene-LOC122881519/gene-bambia/gene-LOC122871826	4	bambia/LOC122871826/LOC122881519/pmepa1	1	gene-LOC122881519	3
BP	GO:0001501	skeletal system development	14/646	142/11595	0.0268476319416707	0.363605723934438	gene-skib/gene-sulf2a/gene-rflna/gene-rflnb/gene-gpc4/gene-LOC122881519/gene-snai2/gene-tgfb3/gene-nog2/gene-LOC122869123/gene-pthlha/gene-dcn/gene-cacna1c/gene-lrrc17	14	cacna1c/dcn/gpc4/LOC122869123/LOC122881519/lrrc17/nog2/pthlha/rflna/rflnb/skib/snai2/sulf2a/tgfb3	4	gene-dcn/gene-LOC122869123/gene-LOC122881519/gene-sulf2a	10
BP	GO:0010975	regulation of neuron projection development	7/646	54/11595	0.0293315482584261	0.3941426797226	gene-ndnf/gene-LOC122877917/gene-omgb/gene-znf296/gene-spartb/gene-pard6gb/gene-si:ch211-278a6.1	7	LOC122877917/ndnf/omgb/pard6gb/si:ch211-278a6.1/spartb/znf296	4	gene-LOC122877917/gene-omgb/gene-si:ch211-278a6.1/gene-spartb	3
BP	GO:0003008	system process	33/646	421/11595	0.0295713868200523	0.394285157600698	gene-LOC122880129/gene-grk1a/gene-sulf2a/gene-LOC122887291/gene-LOC122870658/gene-nptx1l/gene-parvb/gene-LOC122875406/gene-lrrc39/gene-LOC122878127/gene-LOC122878347/gene-ctns/gene-LOC122877917/gene-spartb/gene-zgc:162144/gene-crybb1l1/gene-nkx2.5/gene-cryba2b/gene-impg2a/gene-nyx/gene-snai2/gene-LOC122863516/gene-LOC122862702/gene-edn1/gene-LOC122863926/gene-LOC122865803/gene-pdzph1/gene-myo15b/…	33	cacna1c/cald1a/cryba2b/crybb1l1/ctns/edn1/grk1a/impg2a/LOC122862702/LOC122863516/LOC122863926/LOC122865803/LOC122870445/LOC122870658/LOC122875406/LOC122877917/LOC122878127/LOC122878347/LOC122880129/LOC122887291/lrrc39/myo15b/nkx2.5/nptx1l/nyx/parvb/pawr/pdzph1/snai2/spartb/sulf2a/tnnt1/zgc:162144	26	gene-cryba2b/gene-crybb1l1/gene-ctns/gene-grk1a/gene-impg2a/gene-LOC122862702/gene-LOC122863926/gene-LOC122865803/gene-LOC122870445/gene-LOC122870658/gene-LOC122875406/gene-LOC122877917/gene-LOC122878127/gene-LOC122878347/gene-LOC122880129/gene-LOC122887291/gene-lrrc39/gene-myo15b/gene-nptx1l/gene-nyx/gene-parvb/gene-pdzph1/gene-spartb/gene-sulf2a/gene-tnnt1/gene-zgc:162144	7
BP	GO:0015748	organophosphate ester transport	5/646	32/11595	0.0305260862598709	0.397836032257055	gene-atp8b4/gene-LOC122875390/gene-LOC122876099/gene-LOC122883087/gene-LOC122871278	5	atp8b4/LOC122871278/LOC122875390/LOC122876099/LOC122883087	5	gene-atp8b4/gene-LOC122871278/gene-LOC122875390/gene-LOC122876099/gene-LOC122883087	0
BP	GO:0009132	nucleoside diphosphate metabolic process	6/646	43/11595	0.0307356222959902	0.397836032257055	gene-gpia/gene-gck/gene-aldob/gene-gapdhs/gene-cmpk2/gene-nupr1b	6	aldob/cmpk2/gapdhs/gck/gpia/nupr1b	6	gene-aldob/gene-cmpk2/gene-gapdhs/gene-gck/gene-gpia/gene-nupr1b	0
BP	GO:0008360	regulation of cell shape	4/646	22/11595	0.0313333993796022	0.397836032257055	gene-amotl2a/gene-cfap410/gene-LOC122867164/gene-LOC122869492	4	amotl2a/cfap410/LOC122867164/LOC122869492	1	gene-LOC122869492	3
BP	GO:0060215	primitive hemopoiesis	4/646	22/11595	0.0313333993796022	0.397836032257055	gene-cebpa/gene-trim2a/gene-tmem88a/gene-kdm6bb	4	cebpa/kdm6bb/tmem88a/trim2a	1	gene-cebpa	3
BP	GO:1901888	regulation of cell junction assembly	4/646	22/11595	0.0313333993796022	0.397836032257055	gene-nptx1l/gene-LOC122878127/gene-snai2/gene-phldb2b	4	LOC122878127/nptx1l/phldb2b/snai2	2	gene-LOC122878127/gene-nptx1l	2
BP	GO:0030334	regulation of cell migration	12/646	118/11595	0.031359210893081	0.397836032257055	gene-swap70a/gene-LOC122878127/gene-podn/gene-LOC122877917/gene-gpc4/gene-LOC122881975/gene-LOC122881976/gene-snai2/gene-phldb2b/gene-si:ch211-278a6.1/gene-LOC122871413/gene-tafa5a	12	gpc4/LOC122871413/LOC122877917/LOC122878127/LOC122881975/LOC122881976/phldb2b/podn/si:ch211-278a6.1/snai2/swap70a/tafa5a	7	gene-LOC122871413/gene-LOC122877917/gene-LOC122878127/gene-LOC122881975/gene-LOC122881976/gene-podn/gene-si:ch211-278a6.1	5
BP	GO:0003401	axis elongation	3/646	13/11595	0.0323790003262153	0.397836032257055	gene-gpc4/gene-tnca/gene-dcn	3	dcn/gpc4/tnca	1	gene-dcn	2
BP	GO:0030512	negative regulation of transforming growth factor beta receptor signaling pathway	3/646	13/11595	0.0323790003262153	0.397836032257055	gene-pmepa1/gene-bambia/gene-LOC122871826	3	bambia/LOC122871826/pmepa1	0	-	3
BP	GO:0033002	muscle cell proliferation	3/646	13/11595	0.0323790003262153	0.397836032257055	gene-LOC122878127/gene-LOC122877917/gene-tafa5a	3	LOC122877917/LOC122878127/tafa5a	2	gene-LOC122877917/gene-LOC122878127	1
BP	GO:0045638	negative regulation of myeloid cell differentiation	3/646	13/11595	0.0323790003262153	0.397836032257055	gene-LOC122878127/gene-zbtb46/gene-lrrc17	3	LOC122878127/lrrc17/zbtb46	1	gene-LOC122878127	2
BP	GO:0051270	regulation of cellular component movement	13/646	132/11595	0.0323820026255743	0.397836032257055	gene-swap70a/gene-si:ch211-286b5.4/gene-LOC122878127/gene-podn/gene-LOC122877917/gene-gpc4/gene-LOC122881975/gene-LOC122881976/gene-snai2/gene-phldb2b/gene-si:ch211-278a6.1/gene-LOC122871413/gene-tafa5a	13	gpc4/LOC122871413/LOC122877917/LOC122878127/LOC122881975/LOC122881976/phldb2b/podn/si:ch211-278a6.1/si:ch211-286b5.4/snai2/swap70a/tafa5a	8	gene-LOC122871413/gene-LOC122877917/gene-LOC122878127/gene-LOC122881975/gene-LOC122881976/gene-podn/gene-si:ch211-278a6.1/gene-si:ch211-286b5.4	5
BP	GO:0032989	cellular component morphogenesis	18/646	202/11595	0.0330114017969662	0.401988996146204	gene-nptx1l/gene-vegfc/gene-emb/gene-srrm4/gene-lrrc39/gene-omgb/gene-znf296/gene-spartb/gene-myot/gene-tmod4/gene-LOC122888546/gene-pard6gb/gene-phldb2b/gene-boc/gene-dpysl4/gene-LOC122867164/gene-LOC122869123/gene-si:ch211-278a6.1	18	boc/dpysl4/emb/LOC122867164/LOC122869123/LOC122888546/lrrc39/myot/nptx1l/omgb/pard6gb/phldb2b/si:ch211-278a6.1/spartb/srrm4/tmod4/vegfc/znf296	11	gene-dpysl4/gene-emb/gene-LOC122869123/gene-lrrc39/gene-myot/gene-nptx1l/gene-omgb/gene-si:ch211-278a6.1/gene-spartb/gene-srrm4/gene-tmod4	7
BP	GO:0051093	negative regulation of developmental process	12/646	119/11595	0.0331874636353261	0.401988996146204	gene-LOC122874938/gene-LOC122878127/gene-LOC122877917/gene-znf296/gene-spartb/gene-zbtb46/gene-snai2/gene-tmem88a/gene-nfkbiaa/gene-nog2/gene-lrrc17/gene-tafa5a	12	LOC122874938/LOC122877917/LOC122878127/lrrc17/nfkbiaa/nog2/snai2/spartb/tafa5a/tmem88a/zbtb46/znf296	4	gene-LOC122877917/gene-LOC122878127/gene-nfkbiaa/gene-spartb	8
BP	GO:0009725	response to hormone	10/646	93/11595	0.0338168550585925	0.405095865067229	gene-LOC122864683/gene-LOC122878127/gene-pid1/gene-irs2b/gene-paqr8/gene-tnca/gene-LOC122865952/gene-baiap2l1a/gene-wbp2/gene-si:ch73-335l21.1	10	baiap2l1a/irs2b/LOC122864683/LOC122865952/LOC122878127/paqr8/pid1/si:ch73-335l21.1/tnca/wbp2	5	gene-baiap2l1a/gene-LOC122864683/gene-LOC122878127/gene-paqr8/gene-wbp2	5
BP	GO:0002520	immune system development	19/646	217/11595	0.0339553886274055	0.405095865067229	gene-cebpa/gene-swap70a/gene-alas1/gene-tusc2a/gene-trim2a/gene-angptl2b/gene-LOC122878127/gene-LOC122877917/gene-znf296/gene-zbtb46/gene-gfi1aa/gene-tmem88a/gene-kdm6bb/gene-tgfb3/gene-nfkbiaa/gene-flvcr1/gene-LOC122869123/gene-LOC122868820/gene-lrrc17	19	alas1/angptl2b/cebpa/flvcr1/gfi1aa/kdm6bb/LOC122868820/LOC122869123/LOC122877917/LOC122878127/lrrc17/nfkbiaa/swap70a/tgfb3/tmem88a/trim2a/tusc2a/zbtb46/znf296	9	gene-alas1/gene-cebpa/gene-flvcr1/gene-gfi1aa/gene-LOC122869123/gene-LOC122877917/gene-LOC122878127/gene-nfkbiaa/gene-tusc2a	10
BP	GO:0032869	cellular response to insulin stimulus	5/646	33/11595	0.0343860443603578	0.405095865067229	gene-LOC122878127/gene-pid1/gene-irs2b/gene-baiap2l1a/gene-si:ch73-335l21.1	5	baiap2l1a/irs2b/LOC122878127/pid1/si:ch73-335l21.1	2	gene-baiap2l1a/gene-LOC122878127	3
BP	GO:0050900	leukocyte migration	5/646	33/11595	0.0343860443603578	0.405095865067229	gene-swap70a/gene-LOC122873767/gene-LOC122881975/gene-LOC122881976/gene-mmp9	5	LOC122873767/LOC122881975/LOC122881976/mmp9/swap70a	4	gene-LOC122873767/gene-LOC122881975/gene-LOC122881976/gene-mmp9	1
BP	GO:0005996	monosaccharide metabolic process	9/646	81/11595	0.0357169904821426	0.417913085913506	gene-h6pd/gene-gpia/gene-gck/gene-LOC122878127/gene-insb/gene-gapdhs/gene-LOC122883245/gene-pck2/gene-pfkfb3	9	gapdhs/gck/gpia/h6pd/insb/LOC122878127/LOC122883245/pck2/pfkfb3	9	gene-gapdhs/gene-gck/gene-gpia/gene-h6pd/gene-insb/gene-LOC122878127/gene-LOC122883245/gene-pck2/gene-pfkfb3	0
BP	GO:0042127	regulation of cell population proliferation	20/646	233/11595	0.0360809176064219	0.419156944090247	gene-vegfc/gene-LOC122878127/gene-podn/gene-LOC122877917/gene-pid1/gene-LOC122883012/gene-snai2/gene-irf1b/gene-id2a/gene-fgfr3/gene-ndrg1a/gene-tnca/gene-LOC122865952/gene-nupr1b/gene-ifi35/gene-cbx8a/gene-LOC122869242/gene-bcl6b/gene-sapcd1/gene-tafa5a	20	bcl6b/cbx8a/fgfr3/id2a/ifi35/irf1b/LOC122865952/LOC122869242/LOC122877917/LOC122878127/LOC122883012/ndrg1a/nupr1b/pid1/podn/sapcd1/snai2/tafa5a/tnca/vegfc	11	gene-bcl6b/gene-ifi35/gene-irf1b/gene-LOC122869242/gene-LOC122877917/gene-LOC122878127/gene-LOC122883012/gene-ndrg1a/gene-nupr1b/gene-podn/gene-sapcd1	9
BP	GO:0046058	cAMP metabolic process	4/646	23/11595	0.0363106887613063	0.419156944090247	gene-LOC122872164/gene-pde4ba/gene-LOC122882904/gene-LOC122869764	4	LOC122869764/LOC122872164/LOC122882904/pde4ba	2	gene-LOC122869764/gene-LOC122872164	2
BP	GO:0045596	negative regulation of cell differentiation	8/646	69/11595	0.0372304611488571	0.426909287840228	gene-LOC122878127/gene-znf296/gene-spartb/gene-zbtb46/gene-snai2/gene-nfkbiaa/gene-nog2/gene-lrrc17	8	LOC122878127/lrrc17/nfkbiaa/nog2/snai2/spartb/zbtb46/znf296	3	gene-LOC122878127/gene-nfkbiaa/gene-spartb	5
BP	GO:0007156	homophilic cell adhesion via plasma membrane adhesion molecules	13/646	135/11595	0.0378695953408831	0.430065552850163	gene-LOC122874305/gene-LOC122880006/gene-LOC122880019/gene-LOC122880009/gene-LOC122880002/gene-LOC122880010/gene-LOC122879996/gene-LOC122880004/gene-LOC122880005/gene-LOC122880007/gene-cdhr2/gene-clstn3/gene-pcdh15a	13	cdhr2/clstn3/LOC122874305/LOC122879996/LOC122880002/LOC122880004/LOC122880005/LOC122880006/LOC122880007/LOC122880009/LOC122880010/LOC122880019/pcdh15a	11	gene-cdhr2/gene-clstn3/gene-LOC122879996/gene-LOC122880002/gene-LOC122880004/gene-LOC122880005/gene-LOC122880006/gene-LOC122880007/gene-LOC122880009/gene-LOC122880010/gene-LOC122880019	2
BP	GO:0060560	developmental growth involved in morphogenesis	7/646	57/11595	0.0380057930425725	0.430065552850163	gene-omgb/gene-znf296/gene-spartb/gene-gpc4/gene-pard6gb/gene-tnca/gene-dcn	7	dcn/gpc4/omgb/pard6gb/spartb/tnca/znf296	3	gene-dcn/gene-omgb/gene-spartb	4
BP	GO:0030111	regulation of Wnt signaling pathway	10/646	95/11595	0.0383583229582102	0.431217748288376	gene-sulf2a/gene-LOC122874938/gene-plpp3/gene-sfrp5/gene-LOC122884881/gene-tmem198a/gene-snai2/gene-tmem88a/gene-bambia/gene-caprin2	10	bambia/caprin2/LOC122874938/LOC122884881/plpp3/sfrp5/snai2/sulf2a/tmem198a/tmem88a	3	gene-caprin2/gene-sulf2a/gene-tmem198a	7
BP	GO:0002761	regulation of myeloid leukocyte differentiation	3/646	14/11595	0.0395458558198028	0.433241222994018	gene-LOC122878127/gene-zbtb46/gene-lrrc17	3	LOC122878127/lrrc17/zbtb46	1	gene-LOC122878127	2
BP	GO:0009084	glutamine family amino acid biosynthetic process	3/646	14/11595	0.0395458558198028	0.433241222994018	gene-glulb/gene-oat/gene-aldh18a1	3	aldh18a1/glulb/oat	2	gene-aldh18a1/gene-oat	1
BP	GO:0031102	neuron projection regeneration	3/646	14/11595	0.0395458558198028	0.433241222994018	gene-LOC122877917/gene-omgb/gene-tnca	3	LOC122877917/omgb/tnca	2	gene-LOC122877917/gene-omgb	1
BP	GO:0031103	axon regeneration	3/646	14/11595	0.0395458558198028	0.433241222994018	gene-LOC122877917/gene-omgb/gene-tnca	3	LOC122877917/omgb/tnca	2	gene-LOC122877917/gene-omgb	1
BP	GO:0003007	heart morphogenesis	7/646	58/11595	0.0412341896882127	0.448878520656493	gene-skib/gene-lrrc39/gene-cadm4/gene-snai2/gene-fzd2/gene-mrtfbb/gene-cacna1c	7	cacna1c/cadm4/fzd2/lrrc39/mrtfbb/skib/snai2	2	gene-cadm4/gene-lrrc39	5
BP	GO:0098742	cell-cell adhesion via plasma-membrane adhesion molecules	14/646	151/11595	0.0420958308031202	0.455376282901677	gene-LOC122874305/gene-LOC122877917/gene-LOC122880006/gene-LOC122880019/gene-LOC122880009/gene-LOC122880002/gene-LOC122880010/gene-LOC122879996/gene-LOC122880004/gene-LOC122880005/gene-LOC122880007/gene-cdhr2/gene-clstn3/gene-pcdh15a	14	cdhr2/clstn3/LOC122874305/LOC122877917/LOC122879996/LOC122880002/LOC122880004/LOC122880005/LOC122880006/LOC122880007/LOC122880009/LOC122880010/LOC122880019/pcdh15a	12	gene-cdhr2/gene-clstn3/gene-LOC122877917/gene-LOC122879996/gene-LOC122880002/gene-LOC122880004/gene-LOC122880005/gene-LOC122880006/gene-LOC122880007/gene-LOC122880009/gene-LOC122880010/gene-LOC122880019	2
BP	GO:0120036	plasma membrane bounded cell projection organization	33/646	434/11595	0.0425633437415302	0.456932561563695	gene-LOC122872091/gene-si:ch211-286b5.4/gene-odad3/gene-nptx1l/gene-vegfc/gene-mtss1la/gene-znf703/gene-vdac3/gene-emb/gene-srrm4/gene-LOC122878127/gene-ndnf/gene-amotl2a/gene-LOC122877917/gene-omgb/gene-znf296/gene-spartb/gene-cep126/gene-myot/gene-ccdc13/gene-cfap410/gene-LOC122888546/gene-pard6gb/gene-tnca/gene-boc/gene-dpysl4/gene-LOC122867164/gene-LOC122869123/gene-fzd2/gene-si:ch211-278a6.1…	33	amotl2a/boc/ccdc13/cep126/cfap410/dpysl4/emb/fzd2/LOC122867164/LOC122869123/LOC122870091/LOC122872091/LOC122877917/LOC122878127/LOC122888546/mrtfbb/mtss1la/myot/ndnf/nptx1l/odad3/omgb/pard6gb/rpgrb/si:ch211-278a6.1/si:ch211-286b5.4/spartb/srrm4/tnca/vdac3/vegfc/znf296/znf703	15	gene-ccdc13/gene-dpysl4/gene-emb/gene-LOC122869123/gene-LOC122870091/gene-LOC122877917/gene-LOC122878127/gene-myot/gene-nptx1l/gene-omgb/gene-si:ch211-278a6.1/gene-si:ch211-286b5.4/gene-spartb/gene-srrm4/gene-vdac3	18
BP	GO:0030036	actin cytoskeleton organization	25/646	312/11595	0.0428666227703535	0.456932561563695	gene-swap70a/gene-LOC122885147/gene-LOC122872091/gene-LOC122873669/gene-si:ch211-286b5.4/gene-parvb/gene-rflna/gene-lrrc39/gene-LOC122878127/gene-amotl2a/gene-rflnb/gene-LOC122879509/gene-LOC122880325/gene-tmod4/gene-fmn2a/gene-xirp1/gene-LOC122861414/gene-fmn1/gene-phldb2b/gene-baiap2l1a/gene-LOC122867164/gene-LOC122869123/gene-mrtfbb/gene-LOC122871423/gene-LOC122871413	25	amotl2a/baiap2l1a/fmn1/fmn2a/LOC122861414/LOC122867164/LOC122869123/LOC122871413/LOC122871423/LOC122872091/LOC122873669/LOC122878127/LOC122879509/LOC122880325/LOC122885147/lrrc39/mrtfbb/parvb/phldb2b/rflna/rflnb/si:ch211-286b5.4/swap70a/tmod4/xirp1	15	gene-baiap2l1a/gene-fmn1/gene-LOC122861414/gene-LOC122869123/gene-LOC122871413/gene-LOC122871423/gene-LOC122878127/gene-LOC122879509/gene-LOC122880325/gene-LOC122885147/gene-lrrc39/gene-parvb/gene-si:ch211-286b5.4/gene-tmod4/gene-xirp1	10
BP	GO:0003012	muscle system process	8/646	71/11595	0.0430563784684018	0.456932561563695	gene-sulf2a/gene-LOC122875406/gene-LOC122877917/gene-nkx2.5/gene-LOC122863516/gene-tnnt1/gene-cacna1c/gene-cald1a	8	cacna1c/cald1a/LOC122863516/LOC122875406/LOC122877917/nkx2.5/sulf2a/tnnt1	4	gene-LOC122875406/gene-LOC122877917/gene-sulf2a/gene-tnnt1	4
BP	GO:0008154	actin polymerization or depolymerization	12/646	124/11595	0.0434794095232617	0.456932561563695	gene-swap70a/gene-LOC122885147/gene-LOC122872091/gene-LOC122879509/gene-tmod4/gene-fmn2a/gene-LOC122861414/gene-fmn1/gene-baiap2l1a/gene-LOC122867164/gene-LOC122869123/gene-LOC122871423	12	baiap2l1a/fmn1/fmn2a/LOC122861414/LOC122867164/LOC122869123/LOC122871423/LOC122872091/LOC122879509/LOC122885147/swap70a/tmod4	8	gene-baiap2l1a/gene-fmn1/gene-LOC122861414/gene-LOC122869123/gene-LOC122871423/gene-LOC122879509/gene-LOC122885147/gene-tmod4	4
BP	GO:0040012	regulation of locomotion	13/646	138/11595	0.0439878171907839	0.456932561563695	gene-swap70a/gene-si:ch211-286b5.4/gene-LOC122878127/gene-podn/gene-LOC122877917/gene-gpc4/gene-LOC122881975/gene-LOC122881976/gene-snai2/gene-phldb2b/gene-si:ch211-278a6.1/gene-LOC122871413/gene-tafa5a	13	gpc4/LOC122871413/LOC122877917/LOC122878127/LOC122881975/LOC122881976/phldb2b/podn/si:ch211-278a6.1/si:ch211-286b5.4/snai2/swap70a/tafa5a	8	gene-LOC122871413/gene-LOC122877917/gene-LOC122878127/gene-LOC122881975/gene-LOC122881976/gene-podn/gene-si:ch211-278a6.1/gene-si:ch211-286b5.4	5
BP	GO:0022604	regulation of cell morphogenesis	6/646	47/11595	0.0449881745668488	0.456932561563695	gene-LOC122874995/gene-amotl2a/gene-znf296/gene-cfap410/gene-LOC122867164/gene-LOC122869492	6	amotl2a/cfap410/LOC122867164/LOC122869492/LOC122874995/znf296	2	gene-LOC122869492/gene-LOC122874995	4
BP	GO:1901699	cellular response to nitrogen compound	8/646	72/11595	0.0461829109774662	0.456932561563695	gene-LOC122864683/gene-LOC122878212/gene-LOC122878127/gene-LOC122877917/gene-pid1/gene-irs2b/gene-baiap2l1a/gene-si:ch73-335l21.1	8	baiap2l1a/irs2b/LOC122864683/LOC122877917/LOC122878127/LOC122878212/pid1/si:ch73-335l21.1	5	gene-baiap2l1a/gene-LOC122864683/gene-LOC122877917/gene-LOC122878127/gene-LOC122878212	3
BP	GO:0002274	myeloid leukocyte activation	3/646	15/11595	0.0474429495900877	0.456932561563695	gene-LOC122873767/gene-ndrg1a/gene-ifi35	3	ifi35/LOC122873767/ndrg1a	3	gene-ifi35/gene-LOC122873767/gene-ndrg1a	0
BP	GO:0007528	neuromuscular junction development	3/646	15/11595	0.0474429495900877	0.456932561563695	gene-ppfibp2b/gene-tnca/gene-pdzrn4	3	pdzrn4/ppfibp2b/tnca	0	-	3
BP	GO:0009147	pyrimidine nucleoside triphosphate metabolic process	3/646	15/11595	0.0474429495900877	0.456932561563695	gene-dut/gene-nme5/gene-cmpk2	3	cmpk2/dut/nme5	2	gene-cmpk2/gene-nme5	1
BP	GO:0031349	positive regulation of defense response	3/646	15/11595	0.0474429495900877	0.456932561563695	gene-tlr3/gene-nupr1b/gene-ifi35	3	ifi35/nupr1b/tlr3	2	gene-ifi35/gene-nupr1b	1
BP	GO:0032231	regulation of actin filament bundle assembly	3/646	15/11595	0.0474429495900877	0.456932561563695	gene-swap70a/gene-LOC122878127/gene-phldb2b	3	LOC122878127/phldb2b/swap70a	1	gene-LOC122878127	2
BP	GO:1902106	negative regulation of leukocyte differentiation	3/646	15/11595	0.0474429495900877	0.456932561563695	gene-LOC122878127/gene-zbtb46/gene-lrrc17	3	LOC122878127/lrrc17/zbtb46	1	gene-LOC122878127	2
BP	GO:1903707	negative regulation of hemopoiesis	3/646	15/11595	0.0474429495900877	0.456932561563695	gene-LOC122878127/gene-zbtb46/gene-lrrc17	3	LOC122878127/lrrc17/zbtb46	1	gene-LOC122878127	2
BP	GO:0002764	immune response-regulating signaling pathway	4/646	25/11595	0.0475528654185473	0.456932561563695	gene-tespa1/gene-LOC122870587/gene-LOC122869735/gene-LOC122869738	4	LOC122869735/LOC122869738/LOC122870587/tespa1	3	gene-LOC122869735/gene-LOC122869738/gene-LOC122870587	1
BP	GO:0002768	immune response-regulating cell surface receptor signaling pathway	4/646	25/11595	0.0475528654185473	0.456932561563695	gene-tespa1/gene-LOC122870587/gene-LOC122869735/gene-LOC122869738	4	LOC122869735/LOC122869738/LOC122870587/tespa1	3	gene-LOC122869735/gene-LOC122869738/gene-LOC122870587	1
BP	GO:0006730	one-carbon metabolic process	4/646	25/11595	0.0475528654185473	0.456932561563695	gene-ahcyl1/gene-hspa1b/gene-mthfd1a/gene-aldh1l2	4	ahcyl1/aldh1l2/hspa1b/mthfd1a	2	gene-ahcyl1/gene-aldh1l2	2
BP	GO:0042168	heme metabolic process	4/646	25/11595	0.0475528654185473	0.456932561563695	gene-alas1/gene-hmox2a/gene-flvcr1/gene-hmox1a	4	alas1/flvcr1/hmox1a/hmox2a	3	gene-alas1/gene-flvcr1/gene-hmox1a	1
BP	GO:0061387	regulation of extent of cell growth	4/646	25/11595	0.0475528654185473	0.456932561563695	gene-omgb/gene-znf296/gene-spartb/gene-pard6gb	4	omgb/pard6gb/spartb/znf296	2	gene-omgb/gene-spartb	2
BP	GO:1903034	regulation of response to wounding	4/646	25/11595	0.0475528654185473	0.456932561563695	gene-LOC122877917/gene-omgb/gene-phldb2b/gene-tafa5a	4	LOC122877917/omgb/phldb2b/tafa5a	2	gene-LOC122877917/gene-omgb	2
BP	GO:0010563	negative regulation of phosphorus metabolic process	7/646	60/11595	0.0482124390897281	0.458151354885814	gene-swap70a/gene-ppp1r27b/gene-zgc:162144/gene-zgc:92242/gene-LOC122886518/gene-klhl43/gene-nupr1b	7	klhl43/LOC122886518/nupr1b/ppp1r27b/swap70a/zgc:162144/zgc:92242	6	gene-klhl43/gene-LOC122886518/gene-nupr1b/gene-ppp1r27b/gene-zgc:162144/gene-zgc:92242	1
BP	GO:0045936	negative regulation of phosphate metabolic process	7/646	60/11595	0.0482124390897281	0.458151354885814	gene-swap70a/gene-ppp1r27b/gene-zgc:162144/gene-zgc:92242/gene-LOC122886518/gene-klhl43/gene-nupr1b	7	klhl43/LOC122886518/nupr1b/ppp1r27b/swap70a/zgc:162144/zgc:92242	6	gene-klhl43/gene-LOC122886518/gene-nupr1b/gene-ppp1r27b/gene-zgc:162144/gene-zgc:92242	1
BP	GO:0016052	carbohydrate catabolic process	6/646	48/11595	0.0490990437104314	0.464012940560121	gene-gpia/gene-gck/gene-aldob/gene-gapdhs/gene-enosf1/gene-nupr1b	6	aldob/enosf1/gapdhs/gck/gpia/nupr1b	6	gene-aldob/gene-enosf1/gene-gapdhs/gene-gck/gene-gpia/gene-nupr1b	0
BP	GO:0030029	actin filament-based process	25/646	317/11595	0.0500810156698414	0.47070681394605	gene-swap70a/gene-LOC122885147/gene-LOC122872091/gene-LOC122873669/gene-si:ch211-286b5.4/gene-parvb/gene-rflna/gene-lrrc39/gene-LOC122878127/gene-amotl2a/gene-rflnb/gene-LOC122879509/gene-LOC122880325/gene-tmod4/gene-fmn2a/gene-xirp1/gene-LOC122861414/gene-fmn1/gene-phldb2b/gene-baiap2l1a/gene-LOC122867164/gene-LOC122869123/gene-mrtfbb/gene-LOC122871423/gene-LOC122871413	25	amotl2a/baiap2l1a/fmn1/fmn2a/LOC122861414/LOC122867164/LOC122869123/LOC122871413/LOC122871423/LOC122872091/LOC122873669/LOC122878127/LOC122879509/LOC122880325/LOC122885147/lrrc39/mrtfbb/parvb/phldb2b/rflna/rflnb/si:ch211-286b5.4/swap70a/tmod4/xirp1	15	gene-baiap2l1a/gene-fmn1/gene-LOC122861414/gene-LOC122869123/gene-LOC122871413/gene-LOC122871423/gene-LOC122878127/gene-LOC122879509/gene-LOC122880325/gene-LOC122885147/gene-lrrc39/gene-parvb/gene-si:ch211-286b5.4/gene-tmod4/gene-xirp1	10
BP	GO:0006096	glycolytic process	5/646	37/11595	0.0527454951523301	0.480011913555597	gene-gpia/gene-gck/gene-aldob/gene-gapdhs/gene-nupr1b	5	aldob/gapdhs/gck/gpia/nupr1b	5	gene-aldob/gene-gapdhs/gene-gck/gene-gpia/gene-nupr1b	0
BP	GO:0006757	ATP generation from ADP	5/646	37/11595	0.0527454951523301	0.480011913555597	gene-gpia/gene-gck/gene-aldob/gene-gapdhs/gene-nupr1b	5	aldob/gapdhs/gck/gpia/nupr1b	5	gene-aldob/gene-gapdhs/gene-gck/gene-gpia/gene-nupr1b	0
BP	GO:0007009	plasma membrane organization	5/646	37/11595	0.0527454951523301	0.480011913555597	gene-LOC122875390/gene-mtss1la/gene-ndrg1a/gene-baiap2l1a/gene-LOC122871278	5	baiap2l1a/LOC122871278/LOC122875390/mtss1la/ndrg1a	4	gene-baiap2l1a/gene-LOC122871278/gene-LOC122875390/gene-ndrg1a	1
BP	GO:0008016	regulation of heart contraction	5/646	37/11595	0.0527454951523301	0.480011913555597	gene-parvb/gene-LOC122878127/gene-nkx2.5/gene-pdzph1/gene-cacna1c	5	cacna1c/LOC122878127/nkx2.5/parvb/pdzph1	3	gene-LOC122878127/gene-parvb/gene-pdzph1	2
BP	GO:0042440	pigment metabolic process	5/646	37/11595	0.0527454951523301	0.480011913555597	gene-alas1/gene-hmox2a/gene-LOC122888177/gene-flvcr1/gene-hmox1a	5	alas1/flvcr1/hmox1a/hmox2a/LOC122888177	3	gene-alas1/gene-flvcr1/gene-hmox1a	2
BP	GO:0048738	cardiac muscle tissue development	5/646	37/11595	0.0527454951523301	0.480011913555597	gene-lrrc39/gene-tmem88a/gene-pdzph1/gene-mrtfbb/gene-cacna1c	5	cacna1c/lrrc39/mrtfbb/pdzph1/tmem88a	2	gene-lrrc39/gene-pdzph1	3
BP	GO:0000904	cell morphogenesis involved in differentiation	16/646	185/11595	0.0534340537155971	0.482816052405439	gene-lamb3/gene-LOC122872091/gene-nptx1l/gene-vegfc/gene-LOC122874995/gene-emb/gene-srrm4/gene-omgb/gene-znf296/gene-spartb/gene-myot/gene-LOC122888546/gene-pard6gb/gene-boc/gene-LOC122869123/gene-si:ch211-278a6.1	16	boc/emb/lamb3/LOC122869123/LOC122872091/LOC122874995/LOC122888546/myot/nptx1l/omgb/pard6gb/si:ch211-278a6.1/spartb/srrm4/vegfc/znf296	10	gene-emb/gene-lamb3/gene-LOC122869123/gene-LOC122874995/gene-myot/gene-nptx1l/gene-omgb/gene-si:ch211-278a6.1/gene-spartb/gene-srrm4	6
BP	GO:0006778	porphyrin-containing compound metabolic process	4/646	26/11595	0.0538165315894877	0.482816052405439	gene-alas1/gene-hmox2a/gene-flvcr1/gene-hmox1a	4	alas1/flvcr1/hmox1a/hmox2a	3	gene-alas1/gene-flvcr1/gene-hmox1a	1
BP	GO:0048812	neuron projection morphogenesis	15/646	171/11595	0.0543991427746903	0.482816052405439	gene-nptx1l/gene-vegfc/gene-emb/gene-srrm4/gene-omgb/gene-znf296/gene-spartb/gene-myot/gene-LOC122888546/gene-pard6gb/gene-boc/gene-dpysl4/gene-LOC122867164/gene-LOC122869123/gene-si:ch211-278a6.1	15	boc/dpysl4/emb/LOC122867164/LOC122869123/LOC122888546/myot/nptx1l/omgb/pard6gb/si:ch211-278a6.1/spartb/srrm4/vegfc/znf296	9	gene-dpysl4/gene-emb/gene-LOC122869123/gene-myot/gene-nptx1l/gene-omgb/gene-si:ch211-278a6.1/gene-spartb/gene-srrm4	6
BP	GO:0120039	plasma membrane bounded cell projection morphogenesis	15/646	171/11595	0.0543991427746903	0.482816052405439	gene-nptx1l/gene-vegfc/gene-emb/gene-srrm4/gene-omgb/gene-znf296/gene-spartb/gene-myot/gene-LOC122888546/gene-pard6gb/gene-boc/gene-dpysl4/gene-LOC122867164/gene-LOC122869123/gene-si:ch211-278a6.1	15	boc/dpysl4/emb/LOC122867164/LOC122869123/LOC122888546/myot/nptx1l/omgb/pard6gb/si:ch211-278a6.1/spartb/srrm4/vegfc/znf296	9	gene-dpysl4/gene-emb/gene-LOC122869123/gene-myot/gene-nptx1l/gene-omgb/gene-si:ch211-278a6.1/gene-spartb/gene-srrm4	6
BP	GO:0009611	response to wounding	10/646	101/11595	0.0544571593992182	0.482816052405439	gene-LOC122875406/gene-LOC122877917/gene-omgb/gene-p2ry8/gene-snai2/gene-serpina10b/gene-tnca/gene-phldb2b/gene-fzd2/gene-tafa5a	10	fzd2/LOC122875406/LOC122877917/omgb/p2ry8/phldb2b/serpina10b/snai2/tafa5a/tnca	5	gene-LOC122875406/gene-LOC122877917/gene-omgb/gene-p2ry8/gene-serpina10b	5
BP	GO:0051239	regulation of multicellular organismal process	33/646	444/11595	0.0551642331706234	0.486576825915242	gene-tusc2a/gene-tlr3/gene-nptx1l/gene-parvb/gene-LOC122874938/gene-rflna/gene-LOC122878127/gene-LOC122877917/gene-rflnb/gene-znf296/gene-spartb/gene-nkx2.5/gene-LOC122881519/gene-zbtb46/gene-snai2/gene-tmem88a/gene-tgfb3/gene-tdrd6/gene-edn1/gene-pdzph1/gene-phldb2b/gene-nupr1b/gene-mrtfbb/gene-tnnt1/gene-LOC122869242/gene-bcl6b/gene-LOC122869735/gene-LOC122869738/gene-cacna1c/gene-lrrc17/gene-t…	33	bcl6b/cacna1c/caprin2/edn1/LOC122869242/LOC122869735/LOC122869738/LOC122872132/LOC122874938/LOC122877917/LOC122878127/LOC122881519/lrrc17/mrtfbb/nkx2.5/nptx1l/nupr1b/parvb/pdzph1/phldb2b/rflna/rflnb/snai2/spartb/tafa5a/tdrd6/tgfb3/tlr3/tmem88a/tnnt1/tusc2a/zbtb46/znf296	16	gene-bcl6b/gene-caprin2/gene-LOC122869242/gene-LOC122869735/gene-LOC122869738/gene-LOC122877917/gene-LOC122878127/gene-LOC122881519/gene-nptx1l/gene-nupr1b/gene-parvb/gene-pdzph1/gene-spartb/gene-tdrd6/gene-tnnt1/gene-tusc2a	17
BP	GO:0120035	regulation of plasma membrane bounded cell projection organization	9/646	88/11595	0.0558074555704595	0.489361995011344	gene-vdac3/gene-LOC122878127/gene-ndnf/gene-LOC122877917/gene-omgb/gene-znf296/gene-spartb/gene-pard6gb/gene-si:ch211-278a6.1	9	LOC122877917/LOC122878127/ndnf/omgb/pard6gb/si:ch211-278a6.1/spartb/vdac3/znf296	6	gene-LOC122877917/gene-LOC122878127/gene-omgb/gene-si:ch211-278a6.1/gene-spartb/gene-vdac3	3
BP	GO:0050906	detection of stimulus involved in sensory perception	3/646	16/11595	0.0560490191960668	0.489361995011344	gene-LOC122878347/gene-LOC122863926/gene-LOC122865803	3	LOC122863926/LOC122865803/LOC122878347	3	gene-LOC122863926/gene-LOC122865803/gene-LOC122878347	0
BP	GO:0048858	cell projection morphogenesis	15/646	172/11595	0.0566855542431026	0.492419966152204	gene-nptx1l/gene-vegfc/gene-emb/gene-srrm4/gene-omgb/gene-znf296/gene-spartb/gene-myot/gene-LOC122888546/gene-pard6gb/gene-boc/gene-dpysl4/gene-LOC122867164/gene-LOC122869123/gene-si:ch211-278a6.1	15	boc/dpysl4/emb/LOC122867164/LOC122869123/LOC122888546/myot/nptx1l/omgb/pard6gb/si:ch211-278a6.1/spartb/srrm4/vegfc/znf296	9	gene-dpysl4/gene-emb/gene-LOC122869123/gene-myot/gene-nptx1l/gene-omgb/gene-si:ch211-278a6.1/gene-spartb/gene-srrm4	6
BP	GO:0032868	response to insulin	5/646	38/11595	0.0580755049762376	0.501959138488084	gene-LOC122878127/gene-pid1/gene-irs2b/gene-baiap2l1a/gene-si:ch73-335l21.1	5	baiap2l1a/irs2b/LOC122878127/pid1/si:ch73-335l21.1	2	gene-baiap2l1a/gene-LOC122878127	3
BP	GO:0044057	regulation of system process	9/646	89/11595	0.0591733555107795	0.508814676084248	gene-nptx1l/gene-parvb/gene-LOC122878127/gene-LOC122877917/gene-nkx2.5/gene-edn1/gene-pdzph1/gene-tnnt1/gene-cacna1c	9	cacna1c/edn1/LOC122877917/LOC122878127/nkx2.5/nptx1l/parvb/pdzph1/tnnt1	6	gene-LOC122877917/gene-LOC122878127/gene-nptx1l/gene-parvb/gene-pdzph1/gene-tnnt1	3
BP	GO:0098609	cell-cell adhesion	19/646	232/11595	0.0594603197051941	0.508814676084248	gene-swap70a/gene-LOC122872196/gene-LOC122874305/gene-LOC122878341/gene-LOC122878127/gene-LOC122877917/gene-LOC122880006/gene-LOC122880019/gene-LOC122880009/gene-LOC122880002/gene-LOC122880010/gene-LOC122879996/gene-LOC122880004/gene-LOC122880005/gene-LOC122880007/gene-cdhr2/gene-clstn3/gene-pcdh15a/gene-pdzph1	19	cdhr2/clstn3/LOC122872196/LOC122874305/LOC122877917/LOC122878127/LOC122878341/LOC122879996/LOC122880002/LOC122880004/LOC122880005/LOC122880006/LOC122880007/LOC122880009/LOC122880010/LOC122880019/pcdh15a/pdzph1/swap70a	15	gene-cdhr2/gene-clstn3/gene-LOC122872196/gene-LOC122877917/gene-LOC122878127/gene-LOC122879996/gene-LOC122880002/gene-LOC122880004/gene-LOC122880005/gene-LOC122880006/gene-LOC122880007/gene-LOC122880009/gene-LOC122880010/gene-LOC122880019/gene-pdzph1	4
BP	GO:0009187	cyclic nucleotide metabolic process	4/646	27/11595	0.06050426938388	0.510134035981733	gene-LOC122872164/gene-pde4ba/gene-LOC122882904/gene-LOC122869764	4	LOC122869764/LOC122872164/LOC122882904/pde4ba	2	gene-LOC122869764/gene-LOC122872164	2
BP	GO:0010810	regulation of cell-substrate adhesion	4/646	27/11595	0.06050426938388	0.510134035981733	gene-LOC122874995/gene-LOC122878127/gene-ndnf/gene-phldb2b	4	LOC122874995/LOC122878127/ndnf/phldb2b	2	gene-LOC122874995/gene-LOC122878127	2
BP	GO:0035162	embryonic hemopoiesis	4/646	27/11595	0.06050426938388	0.510134035981733	gene-cebpa/gene-trim2a/gene-tmem88a/gene-kdm6bb	4	cebpa/kdm6bb/tmem88a/trim2a	1	gene-cebpa	3
BP	GO:0061564	axon development	13/646	145/11595	0.0608719742781733	0.510730711016869	gene-nptx1l/gene-vegfc/gene-emb/gene-srrm4/gene-LOC122877917/gene-omgb/gene-znf296/gene-spartb/gene-myot/gene-LOC122888546/gene-pard6gb/gene-tnca/gene-boc	13	boc/emb/LOC122877917/LOC122888546/myot/nptx1l/omgb/pard6gb/spartb/srrm4/tnca/vegfc/znf296	7	gene-emb/gene-LOC122877917/gene-myot/gene-nptx1l/gene-omgb/gene-spartb/gene-srrm4	6
BP	GO:0032990	cell part morphogenesis	15/646	174/11595	0.0614542870675298	0.513113464835686	gene-nptx1l/gene-vegfc/gene-emb/gene-srrm4/gene-omgb/gene-znf296/gene-spartb/gene-myot/gene-LOC122888546/gene-pard6gb/gene-boc/gene-dpysl4/gene-LOC122867164/gene-LOC122869123/gene-si:ch211-278a6.1	15	boc/dpysl4/emb/LOC122867164/LOC122869123/LOC122888546/myot/nptx1l/omgb/pard6gb/si:ch211-278a6.1/spartb/srrm4/vegfc/znf296	9	gene-dpysl4/gene-emb/gene-LOC122869123/gene-myot/gene-nptx1l/gene-omgb/gene-si:ch211-278a6.1/gene-spartb/gene-srrm4	6
BP	GO:0007160	cell-matrix adhesion	5/646	39/11595	0.0637021705444329	0.523520640554037	gene-itgb6/gene-parvb/gene-LOC122878127/gene-itgb2/gene-phldb2b	5	itgb2/itgb6/LOC122878127/parvb/phldb2b	4	gene-itgb2/gene-itgb6/gene-LOC122878127/gene-parvb	1
BP	GO:0051017	actin filament bundle assembly	5/646	39/11595	0.0637021705444329	0.523520640554037	gene-swap70a/gene-LOC122878127/gene-LOC122880325/gene-phldb2b/gene-LOC122867164	5	LOC122867164/LOC122878127/LOC122880325/phldb2b/swap70a	2	gene-LOC122878127/gene-LOC122880325	3
BP	GO:0014070	response to organic cyclic compound	8/646	77/11595	0.0640197622726188	0.523520640554037	gene-tlr3/gene-LOC122878212/gene-LOC122878127/gene-LOC122877917/gene-snai2/gene-paqr8/gene-tnca/gene-LOC122865952	8	LOC122865952/LOC122877917/LOC122878127/LOC122878212/paqr8/snai2/tlr3/tnca	4	gene-LOC122877917/gene-LOC122878127/gene-LOC122878212/gene-paqr8	4
BP	GO:0042060	wound healing	8/646	77/11595	0.0640197622726188	0.523520640554037	gene-LOC122875406/gene-p2ry8/gene-snai2/gene-serpina10b/gene-tnca/gene-phldb2b/gene-fzd2/gene-tafa5a	8	fzd2/LOC122875406/p2ry8/phldb2b/serpina10b/snai2/tafa5a/tnca	3	gene-LOC122875406/gene-p2ry8/gene-serpina10b	5
BP	GO:0032535	regulation of cellular component size	12/646	132/11595	0.0642225902075011	0.523520640554037	gene-swap70a/gene-LOC122885147/gene-omgb/gene-znf296/gene-spartb/gene-LOC122879509/gene-tmod4/gene-fmn2a/gene-LOC122861414/gene-fmn1/gene-pard6gb/gene-baiap2l1a	12	baiap2l1a/fmn1/fmn2a/LOC122861414/LOC122879509/LOC122885147/omgb/pard6gb/spartb/swap70a/tmod4/znf296	8	gene-baiap2l1a/gene-fmn1/gene-LOC122861414/gene-LOC122879509/gene-LOC122885147/gene-omgb/gene-spartb/gene-tmod4	4
BP	GO:0009069	serine family amino acid metabolic process	3/646	17/11595	0.0653383461511196	0.530103563112857	gene-psat1/gene-phgdh/gene-cbsa	3	cbsa/phgdh/psat1	3	gene-cbsa/gene-phgdh/gene-psat1	0
BP	GO:0033013	tetrapyrrole metabolic process	4/646	28/11595	0.0676104243833805	0.544369388980203	gene-alas1/gene-hmox2a/gene-flvcr1/gene-hmox1a	4	alas1/flvcr1/hmox1a/hmox2a	3	gene-alas1/gene-flvcr1/gene-hmox1a	1
BP	GO:0097190	apoptotic signaling pathway	6/646	52/11595	0.0677897146580628	0.544369388980203	gene-uacab/gene-ddit3/gene-LOC122878127/gene-LOC122881737/gene-snai2/gene-nupr1b	6	ddit3/LOC122878127/LOC122881737/nupr1b/snai2/uacab	3	gene-ddit3/gene-LOC122878127/gene-nupr1b	3
BP	GO:0002682	regulation of immune system process	18/646	221/11595	0.0680461736225253	0.544369388980203	gene-swap70a/gene-tespa1/gene-LOC122873342/gene-LOC122874995/gene-LOC122878212/gene-LOC122878127/gene-LOC122881975/gene-LOC122881976/gene-zbtb46/gene-irf1b/gene-LOC122868841/gene-ifi35/gene-LOC122869242/gene-bcl6b/gene-LOC122870587/gene-LOC122869735/gene-LOC122869738/gene-lrrc17	18	bcl6b/ifi35/irf1b/LOC122868841/LOC122869242/LOC122869735/LOC122869738/LOC122870587/LOC122873342/LOC122874995/LOC122878127/LOC122878212/LOC122881975/LOC122881976/lrrc17/swap70a/tespa1/zbtb46	14	gene-bcl6b/gene-ifi35/gene-irf1b/gene-LOC122868841/gene-LOC122869242/gene-LOC122869735/gene-LOC122869738/gene-LOC122870587/gene-LOC122873342/gene-LOC122874995/gene-LOC122878127/gene-LOC122878212/gene-LOC122881975/gene-LOC122881976	4
BP	GO:0071417	cellular response to organonitrogen compound	7/646	65/11595	0.068782289068413	0.546819484358686	gene-LOC122864683/gene-LOC122878127/gene-LOC122877917/gene-pid1/gene-irs2b/gene-baiap2l1a/gene-si:ch73-335l21.1	7	baiap2l1a/irs2b/LOC122864683/LOC122877917/LOC122878127/pid1/si:ch73-335l21.1	4	gene-baiap2l1a/gene-LOC122864683/gene-LOC122877917/gene-LOC122878127	3
BP	GO:0097435	supramolecular fiber organization	22/646	282/11595	0.0691849827837788	0.546819484358686	gene-tppp3/gene-swap70a/gene-LOC122885147/gene-LOC122872091/gene-LOC122873669/gene-rflna/gene-lrrc39/gene-LOC122878127/gene-rflnb/gene-cep126/gene-LOC122879509/gene-LOC122880325/gene-tmod4/gene-fmn2a/gene-ccdc13/gene-LOC122861414/gene-fmn1/gene-phldb2b/gene-baiap2l1a/gene-LOC122867164/gene-LOC122869123/gene-LOC122871423	22	baiap2l1a/ccdc13/cep126/fmn1/fmn2a/LOC122861414/LOC122867164/LOC122869123/LOC122871423/LOC122872091/LOC122873669/LOC122878127/LOC122879509/LOC122880325/LOC122885147/lrrc39/phldb2b/rflna/rflnb/swap70a/tmod4/tppp3	12	gene-baiap2l1a/gene-ccdc13/gene-fmn1/gene-LOC122861414/gene-LOC122869123/gene-LOC122871423/gene-LOC122878127/gene-LOC122879509/gene-LOC122880325/gene-LOC122885147/gene-lrrc39/gene-tmod4	10
BP	GO:0002040	sprouting angiogenesis	5/646	40/11595	0.0696241087642745	0.546819484358686	gene-vegfc/gene-nlgn1/gene-LOC122877917/gene-hspa12b/gene-rcan1b	5	hspa12b/LOC122877917/nlgn1/rcan1b/vegfc	4	gene-hspa12b/gene-LOC122877917/gene-nlgn1/gene-rcan1b	1
BP	GO:0044344	cellular response to fibroblast growth factor stimulus	5/646	40/11595	0.0696241087642745	0.546819484358686	gene-fgf7/gene-sulf2a/gene-ndnf/gene-LOC122888753/gene-sp8a	5	fgf7/LOC122888753/ndnf/sp8a/sulf2a	2	gene-LOC122888753/gene-sulf2a	3
BP	GO:0006935	chemotaxis	12/646	134/11595	0.0702778647466121	0.549445124382603	gene-swap70a/gene-LOC122873767/gene-vegfc/gene-emb/gene-myot/gene-LOC122881975/gene-LOC122881976/gene-LOC122885641/gene-snai2/gene-LOC122888546/gene-boc/gene-dpysl4	12	boc/dpysl4/emb/LOC122873767/LOC122881975/LOC122881976/LOC122885641/LOC122888546/myot/snai2/swap70a/vegfc	7	gene-dpysl4/gene-emb/gene-LOC122873767/gene-LOC122881975/gene-LOC122881976/gene-LOC122885641/gene-myot	5
BP	GO:0072521	purine-containing compound metabolic process	15/646	178/11595	0.0717909763797094	0.558735200783258	gene-ampd3a/gene-LOC122872164/gene-gpia/gene-gda/gene-gck/gene-pde4ba/gene-zgc:162144/gene-macrod1/gene-aldob/gene-nme5/gene-gapdhs/gene-LOC122882904/gene-acaca/gene-nupr1b/gene-LOC122869764	15	acaca/aldob/ampd3a/gapdhs/gck/gda/gpia/LOC122869764/LOC122872164/LOC122882904/macrod1/nme5/nupr1b/pde4ba/zgc:162144	12	gene-acaca/gene-aldob/gene-gapdhs/gene-gck/gene-gda/gene-gpia/gene-LOC122869764/gene-LOC122872164/gene-macrod1/gene-nme5/gene-nupr1b/gene-zgc:162144	3
BP	GO:0044419	biological process involved in interspecies interaction between organisms	23/646	299/11595	0.0726599934991407	0.562254849312935	gene-tusc2a/gene-tlr3/gene-nlrc5/gene-LOC122878212/gene-LOC122878108/gene-LOC122878107/gene-ptx3a/gene-LOC122881737/gene-LOC122881776/gene-wdfy4/gene-ifih1/gene-rsad2/gene-cmpk2/gene-nfkbiaa/gene-LOC122868174/gene-ch25h/gene-LOC122868841/gene-ifi35/gene-dhx58/gene-LOC122868820/gene-LOC122869242/gene-LOC122870587/gene-dram1	23	ch25h/cmpk2/dhx58/dram1/ifi35/ifih1/LOC122868174/LOC122868820/LOC122868841/LOC122869242/LOC122870587/LOC122878107/LOC122878108/LOC122878212/LOC122881737/LOC122881776/nfkbiaa/nlrc5/ptx3a/rsad2/tlr3/tusc2a/wdfy4	20	gene-ch25h/gene-cmpk2/gene-dhx58/gene-dram1/gene-ifi35/gene-ifih1/gene-LOC122868174/gene-LOC122868841/gene-LOC122869242/gene-LOC122870587/gene-LOC122878107/gene-LOC122878108/gene-LOC122878212/gene-LOC122881776/gene-nfkbiaa/gene-nlrc5/gene-ptx3a/gene-rsad2/gene-tusc2a/gene-wdfy4	3
BP	GO:1903522	regulation of blood circulation	6/646	53/11595	0.0730267296840142	0.562254849312935	gene-parvb/gene-LOC122878127/gene-nkx2.5/gene-edn1/gene-pdzph1/gene-cacna1c	6	cacna1c/edn1/LOC122878127/nkx2.5/parvb/pdzph1	3	gene-LOC122878127/gene-parvb/gene-pdzph1	3
BP	GO:0031344	regulation of cell projection organization	9/646	93/11595	0.0739215047560758	0.562254849312935	gene-vdac3/gene-LOC122878127/gene-ndnf/gene-LOC122877917/gene-omgb/gene-znf296/gene-spartb/gene-pard6gb/gene-si:ch211-278a6.1	9	LOC122877917/LOC122878127/ndnf/omgb/pard6gb/si:ch211-278a6.1/spartb/vdac3/znf296	6	gene-LOC122877917/gene-LOC122878127/gene-omgb/gene-si:ch211-278a6.1/gene-spartb/gene-vdac3	3
BP	GO:0009166	nucleotide catabolic process	3/646	18/11595	0.0752815685517044	0.562254849312935	gene-dut/gene-LOC122872164/gene-pde4ba	3	dut/LOC122872164/pde4ba	1	gene-LOC122872164	2
BP	GO:0048678	response to axon injury	3/646	18/11595	0.0752815685517044	0.562254849312935	gene-LOC122877917/gene-omgb/gene-tnca	3	LOC122877917/omgb/tnca	2	gene-LOC122877917/gene-omgb	1
BP	GO:0062014	negative regulation of small molecule metabolic process	3/646	18/11595	0.0752815685517044	0.562254849312935	gene-zgc:162144/gene-snai2/gene-nupr1b	3	nupr1b/snai2/zgc:162144	2	gene-nupr1b/gene-zgc:162144	1
BP	GO:0009135	purine nucleoside diphosphate metabolic process	5/646	41/11595	0.0758390261863959	0.562254849312935	gene-gpia/gene-gck/gene-aldob/gene-gapdhs/gene-nupr1b	5	aldob/gapdhs/gck/gpia/nupr1b	5	gene-aldob/gene-gapdhs/gene-gck/gene-gpia/gene-nupr1b	0
BP	GO:0009179	purine ribonucleoside diphosphate metabolic process	5/646	41/11595	0.0758390261863959	0.562254849312935	gene-gpia/gene-gck/gene-aldob/gene-gapdhs/gene-nupr1b	5	aldob/gapdhs/gck/gpia/nupr1b	5	gene-aldob/gene-gapdhs/gene-gck/gene-gpia/gene-nupr1b	0
BP	GO:0009185	ribonucleoside diphosphate metabolic process	5/646	41/11595	0.0758390261863959	0.562254849312935	gene-gpia/gene-gck/gene-aldob/gene-gapdhs/gene-nupr1b	5	aldob/gapdhs/gck/gpia/nupr1b	5	gene-aldob/gene-gapdhs/gene-gck/gene-gpia/gene-nupr1b	0
BP	GO:0010506	regulation of autophagy	5/646	41/11595	0.0758390261863959	0.562254849312935	gene-ctns/gene-LOC122886528/gene-nupr1b/gene-dram1/gene-dcn	5	ctns/dcn/dram1/LOC122886528/nupr1b	5	gene-ctns/gene-dcn/gene-dram1/gene-LOC122886528/gene-nupr1b	0
BP	GO:0046031	ADP metabolic process	5/646	41/11595	0.0758390261863959	0.562254849312935	gene-gpia/gene-gck/gene-aldob/gene-gapdhs/gene-nupr1b	5	aldob/gapdhs/gck/gpia/nupr1b	5	gene-aldob/gene-gapdhs/gene-gck/gene-gpia/gene-nupr1b	0
BP	GO:0030097	hemopoiesis	17/646	211/11595	0.0806011445465539	0.594995573476707	gene-cebpa/gene-alas1/gene-tusc2a/gene-trim2a/gene-angptl2b/gene-LOC122878127/gene-LOC122877917/gene-znf296/gene-zbtb46/gene-gfi1aa/gene-tmem88a/gene-kdm6bb/gene-tgfb3/gene-nfkbiaa/gene-flvcr1/gene-LOC122869123/gene-lrrc17	17	alas1/angptl2b/cebpa/flvcr1/gfi1aa/kdm6bb/LOC122869123/LOC122877917/LOC122878127/lrrc17/nfkbiaa/tgfb3/tmem88a/trim2a/tusc2a/zbtb46/znf296	9	gene-alas1/gene-cebpa/gene-flvcr1/gene-gfi1aa/gene-LOC122869123/gene-LOC122877917/gene-LOC122878127/gene-nfkbiaa/gene-tusc2a	8
BP	GO:0015074	DNA integration	8/646	81/11595	0.0809970252319164	0.595362749567933	gene-LOC122876217/gene-LOC122882812/gene-LOC122865519/gene-LOC122868980/gene-LOC122869923/gene-LOC122871610/gene-LOC122871611/Novel.18	8	LOC122865519/LOC122868980/LOC122869923/LOC122871610/LOC122871611/LOC122876217/LOC122882812/Novel.18	8	gene-LOC122865519/gene-LOC122868980/gene-LOC122869923/gene-LOC122871610/gene-LOC122871611/gene-LOC122876217/gene-LOC122882812/Novel.18	0
BP	GO:0002011	morphogenesis of an epithelial sheet	4/646	30/11595	0.0830466911181849	0.605749572443866	gene-sox4b/gene-snai2/gene-grhl1/gene-phldb2b	4	grhl1/phldb2b/snai2/sox4b	1	gene-grhl1	3
BP	GO:0048534	hematopoietic or lymphoid organ development	17/646	212/11595	0.0833370221975936	0.605749572443866	gene-cebpa/gene-alas1/gene-tusc2a/gene-trim2a/gene-angptl2b/gene-LOC122878127/gene-LOC122877917/gene-znf296/gene-zbtb46/gene-gfi1aa/gene-tmem88a/gene-kdm6bb/gene-tgfb3/gene-nfkbiaa/gene-flvcr1/gene-LOC122869123/gene-lrrc17	17	alas1/angptl2b/cebpa/flvcr1/gfi1aa/kdm6bb/LOC122869123/LOC122877917/LOC122878127/lrrc17/nfkbiaa/tgfb3/tmem88a/trim2a/tusc2a/zbtb46/znf296	9	gene-alas1/gene-cebpa/gene-flvcr1/gene-gfi1aa/gene-LOC122869123/gene-LOC122877917/gene-LOC122878127/gene-nfkbiaa/gene-tusc2a	8
BP	GO:0042330	taxis	12/646	138/11595	0.0834666562030211	0.605749572443866	gene-swap70a/gene-LOC122873767/gene-vegfc/gene-emb/gene-myot/gene-LOC122881975/gene-LOC122881976/gene-LOC122885641/gene-snai2/gene-LOC122888546/gene-boc/gene-dpysl4	12	boc/dpysl4/emb/LOC122873767/LOC122881975/LOC122881976/LOC122885641/LOC122888546/myot/snai2/swap70a/vegfc	7	gene-dpysl4/gene-emb/gene-LOC122873767/gene-LOC122881975/gene-LOC122881976/gene-LOC122885641/gene-myot	5
BP	GO:0002685	regulation of leukocyte migration	3/646	19/11595	0.0858464033918177	0.608853751729933	gene-swap70a/gene-LOC122881975/gene-LOC122881976	3	LOC122881975/LOC122881976/swap70a	2	gene-LOC122881975/gene-LOC122881976	1
BP	GO:0006541	glutamine metabolic process	3/646	19/11595	0.0858464033918177	0.608853751729933	gene-glulb/gene-gfpt2/gene-asns	3	asns/gfpt2/glulb	2	gene-asns/gene-gfpt2	1
BP	GO:0051781	positive regulation of cell division	3/646	19/11595	0.0858464033918177	0.608853751729933	gene-mdkb/gene-LOC122888753/gene-tgfb3	3	LOC122888753/mdkb/tgfb3	1	gene-LOC122888753	2
BP	GO:0071478	cellular response to radiation	3/646	19/11595	0.0858464033918177	0.608853751729933	gene-grk1a/gene-LOC122878127/gene-snai2	3	grk1a/LOC122878127/snai2	2	gene-grk1a/gene-LOC122878127	1
BP	GO:1904375	regulation of protein localization to cell periphery	3/646	19/11595	0.0858464033918177	0.608853751729933	gene-LOC122877630/gene-LOC122878127/gene-sapcd1	3	LOC122877630/LOC122878127/sapcd1	3	gene-LOC122877630/gene-LOC122878127/gene-sapcd1	0
BP	GO:0110053	regulation of actin filament organization	10/646	110/11595	0.0860182916688219	0.608853751729933	gene-swap70a/gene-LOC122885147/gene-LOC122878127/gene-LOC122879509/gene-tmod4/gene-fmn2a/gene-LOC122861414/gene-fmn1/gene-phldb2b/gene-baiap2l1a	10	baiap2l1a/fmn1/fmn2a/LOC122861414/LOC122878127/LOC122879509/LOC122885147/phldb2b/swap70a/tmod4	7	gene-baiap2l1a/gene-fmn1/gene-LOC122861414/gene-LOC122878127/gene-LOC122879509/gene-LOC122885147/gene-tmod4	3
BP	GO:0008285	negative regulation of cell population proliferation	11/646	125/11595	0.0887656165494833	0.625724837971768	gene-LOC122878127/gene-podn/gene-LOC122877917/gene-LOC122883012/gene-snai2/gene-irf1b/gene-LOC122865952/gene-nupr1b/gene-ifi35/gene-LOC122869242/gene-tafa5a	11	ifi35/irf1b/LOC122865952/LOC122869242/LOC122877917/LOC122878127/LOC122883012/nupr1b/podn/snai2/tafa5a	8	gene-ifi35/gene-irf1b/gene-LOC122869242/gene-LOC122877917/gene-LOC122878127/gene-LOC122883012/gene-nupr1b/gene-podn	3
BP	GO:0071407	cellular response to organic cyclic compound	5/646	43/11595	0.0891343003347873	0.625759169697282	gene-LOC122878212/gene-LOC122877917/gene-snai2/gene-tnca/gene-LOC122865952	5	LOC122865952/LOC122877917/LOC122878212/snai2/tnca	2	gene-LOC122877917/gene-LOC122878212	3
BP	GO:0060070	canonical Wnt signaling pathway	6/646	56/11595	0.0900812115011016	0.629836112934532	gene-LOC122877917/gene-tmem198a/gene-snai2/gene-tmem88a/gene-bambia/gene-caprin2	6	bambia/caprin2/LOC122877917/snai2/tmem198a/tmem88a	3	gene-caprin2/gene-LOC122877917/gene-tmem198a	3
BP	GO:0030177	positive regulation of Wnt signaling pathway	4/646	31/11595	0.0913572522667868	0.632294333801004	gene-sulf2a/gene-tmem198a/gene-bambia/gene-caprin2	4	bambia/caprin2/sulf2a/tmem198a	3	gene-caprin2/gene-sulf2a/gene-tmem198a	1
BP	GO:0060348	bone development	4/646	31/11595	0.0913572522667868	0.632294333801004	gene-sulf2a/gene-gpc4/gene-LOC122869123/gene-lrrc17	4	gpc4/LOC122869123/lrrc17/sulf2a	2	gene-LOC122869123/gene-sulf2a	2
BP	GO:0048568	embryonic organ development	15/646	185/11595	0.092514225441463	0.632294333801004	gene-cebpa/gene-skib/gene-trim2a/gene-znf703/gene-gpc4/gene-sox4b/gene-tmem88a/gene-kdm6bb/gene-LOC122888062/gene-rab32a/gene-pard6gb/gene-fzd2/gene-mrtfbb/gene-pthlha/gene-cacna1c	15	cacna1c/cebpa/fzd2/gpc4/kdm6bb/LOC122888062/mrtfbb/pard6gb/pthlha/rab32a/skib/sox4b/tmem88a/trim2a/znf703	3	gene-cebpa/gene-LOC122888062/gene-rab32a	12
BP	GO:0008283	cell population proliferation	22/646	293/11595	0.0946703674593669	0.632294333801004	gene-vegfc/gene-LOC122878127/gene-amotl2a/gene-podn/gene-LOC122877917/gene-pid1/gene-LOC122883012/gene-snai2/gene-kdm6bb/gene-irf1b/gene-id2a/gene-fgfr3/gene-ndrg1a/gene-tnca/gene-LOC122865952/gene-nupr1b/gene-ifi35/gene-cbx8a/gene-LOC122869242/gene-bcl6b/gene-sapcd1/gene-tafa5a	22	amotl2a/bcl6b/cbx8a/fgfr3/id2a/ifi35/irf1b/kdm6bb/LOC122865952/LOC122869242/LOC122877917/LOC122878127/LOC122883012/ndrg1a/nupr1b/pid1/podn/sapcd1/snai2/tafa5a/tnca/vegfc	11	gene-bcl6b/gene-ifi35/gene-irf1b/gene-LOC122869242/gene-LOC122877917/gene-LOC122878127/gene-LOC122883012/gene-ndrg1a/gene-nupr1b/gene-podn/gene-sapcd1	11
BP	GO:0002684	positive regulation of immune system process	9/646	98/11595	0.0952799952379442	0.632294333801004	gene-swap70a/gene-tespa1/gene-LOC122873342/gene-zbtb46/gene-LOC122868841/gene-ifi35/gene-LOC122870587/gene-LOC122869735/gene-LOC122869738	9	ifi35/LOC122868841/LOC122869735/LOC122869738/LOC122870587/LOC122873342/swap70a/tespa1/zbtb46	6	gene-ifi35/gene-LOC122868841/gene-LOC122869735/gene-LOC122869738/gene-LOC122870587/gene-LOC122873342	3
BP	GO:0030155	regulation of cell adhesion	8/646	84/11595	0.0953223412706671	0.632294333801004	gene-swap70a/gene-LOC122874995/gene-LOC122878127/gene-ndnf/gene-LOC122877917/gene-snai2/gene-tnca/gene-phldb2b	8	LOC122874995/LOC122877917/LOC122878127/ndnf/phldb2b/snai2/swap70a/tnca	3	gene-LOC122874995/gene-LOC122877917/gene-LOC122878127	5
BP	GO:0031099	regeneration	6/646	57/11595	0.096207731319752	0.632294333801004	gene-ccn1/gene-LOC122877917/gene-omgb/gene-kdm6bb/gene-tnca/gene-fzd2	6	ccn1/fzd2/kdm6bb/LOC122877917/omgb/tnca	2	gene-LOC122877917/gene-omgb	4
BP	GO:0048589	developmental growth	11/646	127/11595	0.0966355066194345	0.632294333801004	gene-ccn1/gene-omgb/gene-znf296/gene-spartb/gene-gpc4/gene-kdm6bb/gene-pard6gb/gene-tnca/gene-fzd2/gene-dcn/gene-cacna1c	11	cacna1c/ccn1/dcn/fzd2/gpc4/kdm6bb/omgb/pard6gb/spartb/tnca/znf296	3	gene-dcn/gene-omgb/gene-spartb	8
BP	GO:0001678	cellular glucose homeostasis	3/646	20/11595	0.0969982868364305	0.632294333801004	gene-nptx1l/gene-gck/gene-LOC122878127	3	gck/LOC122878127/nptx1l	3	gene-gck/gene-LOC122878127/gene-nptx1l	0
BP	GO:0035305	negative regulation of dephosphorylation	3/646	20/11595	0.0969982868364305	0.632294333801004	gene-swap70a/gene-ppp1r27b/gene-zgc:92242	3	ppp1r27b/swap70a/zgc:92242	2	gene-ppp1r27b/gene-zgc:92242	1
BP	GO:0090263	positive regulation of canonical Wnt signaling pathway	3/646	20/11595	0.0969982868364305	0.632294333801004	gene-tmem198a/gene-bambia/gene-caprin2	3	bambia/caprin2/tmem198a	2	gene-caprin2/gene-tmem198a	1
BP	GO:0090288	negative regulation of cellular response to growth factor stimulus	3/646	20/11595	0.0969982868364305	0.632294333801004	gene-sulf2a/gene-spartb/gene-nog2	3	nog2/spartb/sulf2a	2	gene-spartb/gene-sulf2a	1
BP	GO:0048469	cell maturation	4/646	32/11595	0.100047418839203	0.632294333801004	gene-tusc2a/gene-srrm4/gene-znf296/gene-tdrd6	4	srrm4/tdrd6/tusc2a/znf296	3	gene-srrm4/gene-tdrd6/gene-tusc2a	1
BP	GO:0007600	sensory perception	15/646	188/11595	0.102439481487232	0.632294333801004	gene-LOC122880129/gene-grk1a/gene-LOC122887291/gene-LOC122878347/gene-zgc:162144/gene-crybb1l1/gene-cryba2b/gene-impg2a/gene-nyx/gene-snai2/gene-LOC122862702/gene-LOC122863926/gene-LOC122865803/gene-myo15b/gene-LOC122870445	15	cryba2b/crybb1l1/grk1a/impg2a/LOC122862702/LOC122863926/LOC122865803/LOC122870445/LOC122878347/LOC122880129/LOC122887291/myo15b/nyx/snai2/zgc:162144	14	gene-cryba2b/gene-crybb1l1/gene-grk1a/gene-impg2a/gene-LOC122862702/gene-LOC122863926/gene-LOC122865803/gene-LOC122870445/gene-LOC122878347/gene-LOC122880129/gene-LOC122887291/gene-myo15b/gene-nyx/gene-zgc:162144	1
BP	GO:0007601	visual perception	10/646	114/11595	0.102995637844817	0.632294333801004	gene-LOC122880129/gene-grk1a/gene-LOC122887291/gene-zgc:162144/gene-crybb1l1/gene-cryba2b/gene-impg2a/gene-nyx/gene-LOC122862702/gene-LOC122870445	10	cryba2b/crybb1l1/grk1a/impg2a/LOC122862702/LOC122870445/LOC122880129/LOC122887291/nyx/zgc:162144	10	gene-cryba2b/gene-crybb1l1/gene-grk1a/gene-impg2a/gene-LOC122862702/gene-LOC122870445/gene-LOC122880129/gene-LOC122887291/gene-nyx/gene-zgc:162144	0
BP	GO:0006090	pyruvate metabolic process	5/646	45/11595	0.10355293034797	0.632294333801004	gene-gpia/gene-gck/gene-aldob/gene-gapdhs/gene-nupr1b	5	aldob/gapdhs/gck/gpia/nupr1b	5	gene-aldob/gene-gapdhs/gene-gck/gene-gpia/gene-nupr1b	0
BP	GO:0035050	embryonic heart tube development	5/646	45/11595	0.10355293034797	0.632294333801004	gene-skib/gene-LOC122888062/gene-pard6gb/gene-fzd2/gene-cacna1c	5	cacna1c/fzd2/LOC122888062/pard6gb/skib	1	gene-LOC122888062	4
BP	GO:0000132	establishment of mitotic spindle orientation	2/646	10/11595	0.103666861704583	0.632294333801004	gene-LOC122877630/gene-sapcd1	2	LOC122877630/sapcd1	2	gene-LOC122877630/gene-sapcd1	0
BP	GO:0001935	endothelial cell proliferation	2/646	10/11595	0.103666861704583	0.632294333801004	gene-vegfc/gene-amotl2a	2	amotl2a/vegfc	0	-	2
BP	GO:0002200	somatic diversification of immune receptors	2/646	10/11595	0.103666861704583	0.632294333801004	gene-swap70a/gene-LOC122868820	2	LOC122868820/swap70a	0	-	2
BP	GO:0007606	sensory perception of chemical stimulus	2/646	10/11595	0.103666861704583	0.632294333801004	gene-LOC122878347/gene-LOC122863926	2	LOC122863926/LOC122878347	2	gene-LOC122863926/gene-LOC122878347	0
BP	GO:0009214	cyclic nucleotide catabolic process	2/646	10/11595	0.103666861704583	0.632294333801004	gene-LOC122872164/gene-pde4ba	2	LOC122872164/pde4ba	1	gene-LOC122872164	1
BP	GO:0022612	gland morphogenesis	2/646	10/11595	0.103666861704583	0.632294333801004	gene-snai2/gene-tnca	2	snai2/tnca	0	-	2
BP	GO:0031280	negative regulation of cyclase activity	2/646	10/11595	0.103666861704583	0.632294333801004	gene-adgrv1/gene-zgc:162144	2	adgrv1/zgc:162144	2	gene-adgrv1/gene-zgc:162144	0
BP	GO:0034204	lipid translocation	2/646	10/11595	0.103666861704583	0.632294333801004	gene-LOC122875390/gene-LOC122871278	2	LOC122871278/LOC122875390	2	gene-LOC122871278/gene-LOC122875390	0
BP	GO:0042542	response to hydrogen peroxide	2/646	10/11595	0.103666861704583	0.632294333801004	gene-LOC122877917/gene-cbx8a	2	cbx8a/LOC122877917	1	gene-LOC122877917	1
BP	GO:0045332	phospholipid translocation	2/646	10/11595	0.103666861704583	0.632294333801004	gene-LOC122875390/gene-LOC122871278	2	LOC122871278/LOC122875390	2	gene-LOC122871278/gene-LOC122875390	0
BP	GO:0050921	positive regulation of chemotaxis	2/646	10/11595	0.103666861704583	0.632294333801004	gene-swap70a/gene-snai2	2	snai2/swap70a	0	-	2
BP	GO:0051294	establishment of spindle orientation	2/646	10/11595	0.103666861704583	0.632294333801004	gene-LOC122877630/gene-sapcd1	2	LOC122877630/sapcd1	2	gene-LOC122877630/gene-sapcd1	0
BP	GO:0051350	negative regulation of lyase activity	2/646	10/11595	0.103666861704583	0.632294333801004	gene-adgrv1/gene-zgc:162144	2	adgrv1/zgc:162144	2	gene-adgrv1/gene-zgc:162144	0
BP	GO:0060037	pharyngeal system development	2/646	10/11595	0.103666861704583	0.632294333801004	gene-gpc4/gene-LOC122888062	2	gpc4/LOC122888062	1	gene-LOC122888062	1
BP	GO:0061045	negative regulation of wound healing	2/646	10/11595	0.103666861704583	0.632294333801004	gene-phldb2b/gene-tafa5a	2	phldb2b/tafa5a	0	-	2
BP	GO:0061311	cell surface receptor signaling pathway involved in heart development	2/646	10/11595	0.103666861704583	0.632294333801004	gene-tmem88a/gene-fzd2	2	fzd2/tmem88a	0	-	2
BP	GO:0097035	regulation of membrane lipid distribution	2/646	10/11595	0.103666861704583	0.632294333801004	gene-LOC122875390/gene-LOC122871278	2	LOC122871278/LOC122875390	2	gene-LOC122871278/gene-LOC122875390	0
BP	GO:0097205	renal filtration	2/646	10/11595	0.103666861704583	0.632294333801004	gene-LOC122870658/gene-ctns	2	ctns/LOC122870658	2	gene-ctns/gene-LOC122870658	0
BP	GO:0097305	response to alcohol	2/646	10/11595	0.103666861704583	0.632294333801004	gene-LOC122877917/gene-tnca	2	LOC122877917/tnca	1	gene-LOC122877917	1
BP	GO:0002521	leukocyte differentiation	7/646	72/11595	0.105177158190755	0.636988422845419	gene-cebpa/gene-alas1/gene-tusc2a/gene-LOC122878127/gene-znf296/gene-zbtb46/gene-lrrc17	7	alas1/cebpa/LOC122878127/lrrc17/tusc2a/zbtb46/znf296	4	gene-alas1/gene-cebpa/gene-LOC122878127/gene-tusc2a	3
BP	GO:0046395	carboxylic acid catabolic process	7/646	72/11595	0.105177158190755	0.636988422845419	gene-hal/gene-ddah1/gene-aldh5a1/gene-LOC122883755/gene-lpin1b/gene-enosf1/gene-aldh1l2	7	aldh1l2/aldh5a1/ddah1/enosf1/hal/LOC122883755/lpin1b	6	gene-aldh1l2/gene-aldh5a1/gene-enosf1/gene-hal/gene-LOC122883755/gene-lpin1b	1
BP	GO:0007507	heart development	14/646	174/11595	0.106333957305526	0.641734759878962	gene-skib/gene-lrrc39/gene-nkx2.5/gene-cadm4/gene-snai2/gene-tmem88a/gene-kdm6bb/gene-LOC122888062/gene-pard6gb/gene-pdzph1/gene-si:ch211-198m17.1/gene-fzd2/gene-mrtfbb/gene-cacna1c	14	cacna1c/cadm4/fzd2/kdm6bb/LOC122888062/lrrc39/mrtfbb/nkx2.5/pard6gb/pdzph1/si:ch211-198m17.1/skib/snai2/tmem88a	4	gene-cadm4/gene-LOC122888062/gene-lrrc39/gene-pdzph1	10
BP	GO:0034599	cellular response to oxidative stress	3/646	21/11595	0.108700940046558	0.644895192131111	gene-LOC122877917/gene-cbx8a/gene-nfe2l1a	3	cbx8a/LOC122877917/nfe2l1a	2	gene-LOC122877917/gene-nfe2l1a	1
BP	GO:0045637	regulation of myeloid cell differentiation	3/646	21/11595	0.108700940046558	0.644895192131111	gene-LOC122878127/gene-zbtb46/gene-lrrc17	3	LOC122878127/lrrc17/zbtb46	1	gene-LOC122878127	2
BP	GO:0051051	negative regulation of transport	3/646	21/11595	0.108700940046558	0.644895192131111	gene-cttnbp2nla/gene-wdr54/gene-LOC122886797	3	cttnbp2nla/LOC122886797/wdr54	1	gene-LOC122886797	2
BP	GO:1901292	nucleoside phosphate catabolic process	3/646	21/11595	0.108700940046558	0.644895192131111	gene-dut/gene-LOC122872164/gene-pde4ba	3	dut/LOC122872164/pde4ba	1	gene-LOC122872164	2
BP	GO:0008361	regulation of cell size	4/646	33/11595	0.10910416014663	0.644895192131111	gene-omgb/gene-znf296/gene-spartb/gene-pard6gb	4	omgb/pard6gb/spartb/znf296	2	gene-omgb/gene-spartb	2
BP	GO:0051606	detection of stimulus	6/646	59/11595	0.109107267971019	0.644895192131111	gene-grk1a/gene-LOC122887291/gene-LOC122878347/gene-cfap410/gene-LOC122863926/gene-LOC122865803	6	cfap410/grk1a/LOC122863926/LOC122865803/LOC122878347/LOC122887291	5	gene-grk1a/gene-LOC122863926/gene-LOC122865803/gene-LOC122878347/gene-LOC122887291	1
BP	GO:0001655	urogenital system development	8/646	87/11595	0.110996128430623	0.65037793467938	gene-sulf2a/gene-LOC122870658/gene-cxadr/gene-LOC122888062/gene-pard6gb/gene-tnca/gene-LOC122865952/gene-cacna1c	8	cacna1c/cxadr/LOC122865952/LOC122870658/LOC122888062/pard6gb/sulf2a/tnca	4	gene-cxadr/gene-LOC122870658/gene-LOC122888062/gene-sulf2a	4
BP	GO:0030030	cell projection organization	33/646	475/11595	0.111021051801365	0.65037793467938	gene-LOC122872091/gene-si:ch211-286b5.4/gene-odad3/gene-nptx1l/gene-vegfc/gene-mtss1la/gene-znf703/gene-vdac3/gene-emb/gene-srrm4/gene-LOC122878127/gene-ndnf/gene-amotl2a/gene-LOC122877917/gene-omgb/gene-znf296/gene-spartb/gene-cep126/gene-myot/gene-ccdc13/gene-cfap410/gene-LOC122888546/gene-pard6gb/gene-tnca/gene-boc/gene-dpysl4/gene-LOC122867164/gene-LOC122869123/gene-fzd2/gene-si:ch211-278a6.1…	33	amotl2a/boc/ccdc13/cep126/cfap410/dpysl4/emb/fzd2/LOC122867164/LOC122869123/LOC122870091/LOC122872091/LOC122877917/LOC122878127/LOC122888546/mrtfbb/mtss1la/myot/ndnf/nptx1l/odad3/omgb/pard6gb/rpgrb/si:ch211-278a6.1/si:ch211-286b5.4/spartb/srrm4/tnca/vdac3/vegfc/znf296/znf703	15	gene-ccdc13/gene-dpysl4/gene-emb/gene-LOC122869123/gene-LOC122870091/gene-LOC122877917/gene-LOC122878127/gene-myot/gene-nptx1l/gene-omgb/gene-si:ch211-278a6.1/gene-si:ch211-286b5.4/gene-spartb/gene-srrm4/gene-vdac3	18
BP	GO:0060828	regulation of canonical Wnt signaling pathway	5/646	46/11595	0.111169251625429	0.65037793467938	gene-tmem198a/gene-snai2/gene-tmem88a/gene-bambia/gene-caprin2	5	bambia/caprin2/snai2/tmem198a/tmem88a	2	gene-caprin2/gene-tmem198a	3
BP	GO:0009617	response to bacterium	11/646	131/11595	0.113585757412181	0.662262721182884	gene-tusc2a/gene-LOC122878108/gene-LOC122878107/gene-LOC122881737/gene-LOC122881776/gene-cmpk2/gene-LOC122868174/gene-LOC122868820/gene-LOC122869242/gene-LOC122870587/gene-dram1	11	cmpk2/dram1/LOC122868174/LOC122868820/LOC122869242/LOC122870587/LOC122878107/LOC122878108/LOC122881737/LOC122881776/tusc2a	9	gene-cmpk2/gene-dram1/gene-LOC122868174/gene-LOC122869242/gene-LOC122870587/gene-LOC122878107/gene-LOC122878108/gene-LOC122881776/gene-tusc2a	2
BP	GO:0060047	heart contraction	6/646	60/11595	0.11587336006894	0.666540794421515	gene-parvb/gene-lrrc39/gene-LOC122878127/gene-nkx2.5/gene-pdzph1/gene-cacna1c	6	cacna1c/LOC122878127/lrrc39/nkx2.5/parvb/pdzph1	4	gene-LOC122878127/gene-lrrc39/gene-parvb/gene-pdzph1	2
BP	GO:0048667	cell morphogenesis involved in neuron differentiation	13/646	162/11595	0.118255900257449	0.666540794421515	gene-nptx1l/gene-vegfc/gene-emb/gene-srrm4/gene-omgb/gene-znf296/gene-spartb/gene-myot/gene-LOC122888546/gene-pard6gb/gene-boc/gene-LOC122869123/gene-si:ch211-278a6.1	13	boc/emb/LOC122869123/LOC122888546/myot/nptx1l/omgb/pard6gb/si:ch211-278a6.1/spartb/srrm4/vegfc/znf296	8	gene-emb/gene-LOC122869123/gene-myot/gene-nptx1l/gene-omgb/gene-si:ch211-278a6.1/gene-spartb/gene-srrm4	5
BP	GO:0048584	positive regulation of response to stimulus	21/646	286/11595	0.118942161578067	0.666540794421515	gene-swap70a/gene-tespa1/gene-sulf2a/gene-tlr3/gene-LOC122873342/gene-angptl2b/gene-LOC122878127/gene-tmem198a/gene-snai2/gene-sp8a/gene-bambia/gene-dok6/gene-LOC122868841/gene-nupr1b/gene-ifi35/gene-cbx8a/gene-LOC122870587/gene-LOC122869735/gene-LOC122869738/gene-LOC122871413/gene-caprin2	21	angptl2b/bambia/caprin2/cbx8a/dok6/ifi35/LOC122868841/LOC122869735/LOC122869738/LOC122870587/LOC122871413/LOC122873342/LOC122878127/nupr1b/snai2/sp8a/sulf2a/swap70a/tespa1/tlr3/tmem198a	13	gene-caprin2/gene-dok6/gene-ifi35/gene-LOC122868841/gene-LOC122869735/gene-LOC122869738/gene-LOC122870587/gene-LOC122871413/gene-LOC122873342/gene-LOC122878127/gene-nupr1b/gene-sulf2a/gene-tmem198a	8
BP	GO:0006220	pyrimidine nucleotide metabolic process	3/646	22/11595	0.120916867520288	0.666540794421515	gene-dut/gene-nme5/gene-cmpk2	3	cmpk2/dut/nme5	2	gene-cmpk2/gene-nme5	1
BP	GO:0006221	pyrimidine nucleotide biosynthetic process	3/646	22/11595	0.120916867520288	0.666540794421515	gene-dut/gene-nme5/gene-cmpk2	3	cmpk2/dut/nme5	2	gene-cmpk2/gene-nme5	1
BP	GO:0030010	establishment of cell polarity	3/646	22/11595	0.120916867520288	0.666540794421515	gene-LOC122877630/gene-gpc4/gene-sapcd1	3	gpc4/LOC122877630/sapcd1	2	gene-LOC122877630/gene-sapcd1	1
BP	GO:0030510	regulation of BMP signaling pathway	3/646	22/11595	0.120916867520288	0.666540794421515	gene-spartb/gene-sfrp5/gene-nog2	3	nog2/sfrp5/spartb	1	gene-spartb	2
BP	GO:0090504	epiboly	3/646	22/11595	0.120916867520288	0.666540794421515	gene-snai2/gene-grhl1/gene-phldb2b	3	grhl1/phldb2b/snai2	1	gene-grhl1	2
BP	GO:0050953	sensory perception of light stimulus	10/646	118/11595	0.121776680483764	0.666540794421515	gene-LOC122880129/gene-grk1a/gene-LOC122887291/gene-zgc:162144/gene-crybb1l1/gene-cryba2b/gene-impg2a/gene-nyx/gene-LOC122862702/gene-LOC122870445	10	cryba2b/crybb1l1/grk1a/impg2a/LOC122862702/LOC122870445/LOC122880129/LOC122887291/nyx/zgc:162144	10	gene-cryba2b/gene-crybb1l1/gene-grk1a/gene-impg2a/gene-LOC122862702/gene-LOC122870445/gene-LOC122880129/gene-LOC122887291/gene-nyx/gene-zgc:162144	0
BP	GO:0006739	NADP metabolic process	2/646	11/11595	0.122194343671135	0.666540794421515	gene-h6pd/gene-LOC122883245	2	h6pd/LOC122883245	2	gene-h6pd/gene-LOC122883245	0
BP	GO:0016540	protein autoprocessing	2/646	11/11595	0.122194343671135	0.666540794421515	gene-LOC122870952/gene-LOC122871823	2	LOC122870952/LOC122871823	1	gene-LOC122870952	1
BP	GO:0030514	negative regulation of BMP signaling pathway	2/646	11/11595	0.122194343671135	0.666540794421515	gene-spartb/gene-nog2	2	nog2/spartb	1	gene-spartb	1
BP	GO:0032104	regulation of response to extracellular stimulus	2/646	11/11595	0.122194343671135	0.666540794421515	gene-snai2/gene-LOC122865952	2	LOC122865952/snai2	0	-	2
BP	GO:0032107	regulation of response to nutrient levels	2/646	11/11595	0.122194343671135	0.666540794421515	gene-snai2/gene-LOC122865952	2	LOC122865952/snai2	0	-	2
BP	GO:0070831	basement membrane assembly	2/646	11/11595	0.122194343671135	0.666540794421515	gene-lamb3/gene-phldb2b	2	lamb3/phldb2b	1	gene-lamb3	1
BP	GO:0071482	cellular response to light stimulus	2/646	11/11595	0.122194343671135	0.666540794421515	gene-grk1a/gene-LOC122878127	2	grk1a/LOC122878127	2	gene-grk1a/gene-LOC122878127	0
BP	GO:0072015	glomerular visceral epithelial cell development	2/646	11/11595	0.122194343671135	0.666540794421515	gene-LOC122870658/gene-LOC122865952	2	LOC122865952/LOC122870658	1	gene-LOC122870658	1
BP	GO:0072310	glomerular epithelial cell development	2/646	11/11595	0.122194343671135	0.666540794421515	gene-LOC122870658/gene-LOC122865952	2	LOC122865952/LOC122870658	1	gene-LOC122870658	1
BP	GO:0007409	axonogenesis	11/646	133/11595	0.122659744026301	0.666540794421515	gene-nptx1l/gene-vegfc/gene-emb/gene-srrm4/gene-omgb/gene-znf296/gene-spartb/gene-myot/gene-LOC122888546/gene-pard6gb/gene-boc	11	boc/emb/LOC122888546/myot/nptx1l/omgb/pard6gb/spartb/srrm4/vegfc/znf296	6	gene-emb/gene-myot/gene-nptx1l/gene-omgb/gene-spartb/gene-srrm4	5
BP	GO:0003015	heart process	6/646	61/11595	0.122845018506756	0.666540794421515	gene-parvb/gene-lrrc39/gene-LOC122878127/gene-nkx2.5/gene-pdzph1/gene-cacna1c	6	cacna1c/LOC122878127/lrrc39/nkx2.5/parvb/pdzph1	4	gene-LOC122878127/gene-lrrc39/gene-parvb/gene-pdzph1	2
BP	GO:0060284	regulation of cell development	6/646	61/11595	0.122845018506756	0.666540794421515	gene-LOC122874995/gene-rflna/gene-rflnb/gene-znf296/gene-spartb/gene-tdrd6	6	LOC122874995/rflna/rflnb/spartb/tdrd6/znf296	3	gene-LOC122874995/gene-spartb/gene-tdrd6	3
BP	GO:0072330	monocarboxylic acid biosynthetic process	6/646	61/11595	0.122845018506756	0.666540794421515	gene-scdb/gene-acaca/gene-LOC122866220/gene-scd/gene-fasn/gene-LOC122871599	6	acaca/fasn/LOC122866220/LOC122871599/scd/scdb	6	gene-acaca/gene-fasn/gene-LOC122866220/gene-LOC122871599/gene-scd/gene-scdb	0
BP	GO:0043547	positive regulation of GTPase activity	16/646	210/11595	0.126289251670531	0.6767615224037	gene-tbc1d9/gene-si:dkey-91m11.5/gene-arhgap25/gene-sgsm1a/gene-rap1gap2a/gene-rasgrp3/gene-asap1a/gene-zmp:0000001168/gene-LOC122864981/gene-arhgap24/gene-arhgap27/gene-si:dkey-191m6.4/gene-rundc1/gene-sgsm3/gene-LOC122869489/gene-tbc1d30	16	arhgap24/arhgap25/arhgap27/asap1a/LOC122864981/LOC122869489/rap1gap2a/rasgrp3/rundc1/sgsm1a/sgsm3/si:dkey-191m6.4/si:dkey-91m11.5/tbc1d30/tbc1d9/zmp:0000001168	11	gene-arhgap25/gene-asap1a/gene-LOC122864981/gene-rap1gap2a/gene-rasgrp3/gene-rundc1/gene-sgsm1a/gene-sgsm3/gene-si:dkey-191m6.4/gene-tbc1d30/gene-zmp:0000001168	5
BP	GO:0006163	purine nucleotide metabolic process	13/646	164/11595	0.126567625967911	0.6767615224037	gene-ampd3a/gene-LOC122872164/gene-gpia/gene-gck/gene-pde4ba/gene-zgc:162144/gene-aldob/gene-nme5/gene-gapdhs/gene-LOC122882904/gene-acaca/gene-nupr1b/gene-LOC122869764	13	acaca/aldob/ampd3a/gapdhs/gck/gpia/LOC122869764/LOC122872164/LOC122882904/nme5/nupr1b/pde4ba/zgc:162144	10	gene-acaca/gene-aldob/gene-gapdhs/gene-gck/gene-gpia/gene-LOC122869764/gene-LOC122872164/gene-nme5/gene-nupr1b/gene-zgc:162144	3
BP	GO:0006633	fatty acid biosynthetic process	5/646	48/11595	0.127181545178147	0.6767615224037	gene-scdb/gene-acaca/gene-LOC122866220/gene-scd/gene-fasn	5	acaca/fasn/LOC122866220/scd/scdb	5	gene-acaca/gene-fasn/gene-LOC122866220/gene-scd/gene-scdb	0
BP	GO:0060026	convergent extension	5/646	48/11595	0.127181545178147	0.6767615224037	gene-amotl2a/gene-gpc4/gene-fzd2/gene-dcn/gene-LOC122871826	5	amotl2a/dcn/fzd2/gpc4/LOC122871826	1	gene-dcn	4
BP	GO:0030336	negative regulation of cell migration	4/646	35/11595	0.128260126935109	0.6767615224037	gene-podn/gene-LOC122877917/gene-phldb2b/gene-tafa5a	4	LOC122877917/phldb2b/podn/tafa5a	2	gene-LOC122877917/gene-podn	2
BP	GO:0030509	BMP signaling pathway	4/646	35/11595	0.128260126935109	0.6767615224037	gene-spartb/gene-sfrp5/gene-id2a/gene-nog2	4	id2a/nog2/sfrp5/spartb	1	gene-spartb	3
BP	GO:0071772	response to BMP	4/646	35/11595	0.128260126935109	0.6767615224037	gene-spartb/gene-sfrp5/gene-id2a/gene-nog2	4	id2a/nog2/sfrp5/spartb	1	gene-spartb	3
BP	GO:0071773	cellular response to BMP stimulus	4/646	35/11595	0.128260126935109	0.6767615224037	gene-spartb/gene-sfrp5/gene-id2a/gene-nog2	4	id2a/nog2/sfrp5/spartb	1	gene-spartb	3
BP	GO:0048585	negative regulation of response to stimulus	26/646	369/11595	0.128648090268494	0.6767615224037	gene-pmepa1/gene-sulf2a/gene-metrnlb/gene-LOC122874938/gene-LOC122874995/gene-LOC122877917/gene-pid1/gene-spartb/gene-si:ch211-39i2.2/gene-sox4b/gene-dact2/gene-LOC122884781/gene-LOC122884881/gene-snai2/gene-tmem88a/gene-LOC122862418/gene-klhl43/gene-LOC122865952/gene-bambia/gene-phldb2b/gene-nog2/gene-ifi35/gene-LOC122868714/gene-LOC122869242/gene-tafa5a/gene-LOC122871826	26	bambia/dact2/ifi35/klhl43/LOC122862418/LOC122865952/LOC122868714/LOC122869242/LOC122871826/LOC122874938/LOC122874995/LOC122877917/LOC122884781/LOC122884881/metrnlb/nog2/phldb2b/pid1/pmepa1/si:ch211-39i2.2/snai2/sox4b/spartb/sulf2a/tafa5a/tmem88a	10	gene-ifi35/gene-klhl43/gene-LOC122869242/gene-LOC122874995/gene-LOC122877917/gene-LOC122884781/gene-metrnlb/gene-si:ch211-39i2.2/gene-spartb/gene-sulf2a	16
BP	GO:0048666	neuron development	22/646	305/11595	0.128663382456982	0.6767615224037	gene-LOC122872091/gene-nptx1l/gene-vegfc/gene-emb/gene-srrm4/gene-ndnf/gene-LOC122877917/gene-omgb/gene-znf296/gene-spartb/gene-myot/gene-LOC122888546/gene-pard6gb/gene-tnca/gene-boc/gene-dpysl4/gene-LOC122867164/gene-LOC122869123/gene-si:ch211-278a6.1/gene-mrtfbb/gene-LOC122870091/gene-rpgrb	22	boc/dpysl4/emb/LOC122867164/LOC122869123/LOC122870091/LOC122872091/LOC122877917/LOC122888546/mrtfbb/myot/ndnf/nptx1l/omgb/pard6gb/rpgrb/si:ch211-278a6.1/spartb/srrm4/tnca/vegfc/znf296	11	gene-dpysl4/gene-emb/gene-LOC122869123/gene-LOC122870091/gene-LOC122877917/gene-myot/gene-nptx1l/gene-omgb/gene-si:ch211-278a6.1/gene-spartb/gene-srrm4	11
BP	GO:0090066	regulation of anatomical structure size	14/646	180/11595	0.129580062403223	0.678795324734938	gene-swap70a/gene-LOC122885147/gene-omgb/gene-znf296/gene-spartb/gene-LOC122879509/gene-tmod4/gene-fmn2a/gene-LOC122861414/gene-LOC122863516/gene-fmn1/gene-edn1/gene-pard6gb/gene-baiap2l1a	14	baiap2l1a/edn1/fmn1/fmn2a/LOC122861414/LOC122863516/LOC122879509/LOC122885147/omgb/pard6gb/spartb/swap70a/tmod4/znf296	8	gene-baiap2l1a/gene-fmn1/gene-LOC122861414/gene-LOC122879509/gene-LOC122885147/gene-omgb/gene-spartb/gene-tmod4	6
BP	GO:0016054	organic acid catabolic process	7/646	76/11595	0.129839338277788	0.678795324734938	gene-hal/gene-ddah1/gene-aldh5a1/gene-LOC122883755/gene-lpin1b/gene-enosf1/gene-aldh1l2	7	aldh1l2/aldh5a1/ddah1/enosf1/hal/LOC122883755/lpin1b	6	gene-aldh1l2/gene-aldh5a1/gene-enosf1/gene-hal/gene-LOC122883755/gene-lpin1b	1
BP	GO:0051130	positive regulation of cellular component organization	12/646	150/11595	0.131736784491648	0.679292761876716	gene-tppp3/gene-swap70a/gene-znf703/gene-LOC122878127/gene-ndnf/gene-znf296/gene-fmn2a/gene-LOC122886528/gene-snai2/gene-LOC122861414/gene-fmn1/gene-phldb2b	12	fmn1/fmn2a/LOC122861414/LOC122878127/LOC122886528/ndnf/phldb2b/snai2/swap70a/tppp3/znf296/znf703	4	gene-fmn1/gene-LOC122861414/gene-LOC122878127/gene-LOC122886528	8
BP	GO:0060429	epithelium development	22/646	306/11595	0.131789758288761	0.679292761876716	gene-skib/gene-LOC122870658/gene-vegfc/gene-amotl2a/gene-LOC122877917/gene-gpc4/gene-sox4b/gene-LOC122882909/gene-LOC122882907/gene-snai2/gene-LOC122888062/gene-grhl1/gene-pard6gb/gene-tnca/gene-LOC122865952/gene-phldb2b/gene-LOC122869123/gene-fzd2/gene-dcn/gene-cacna1c/gene-sapcd1/gene-LOC122871826	22	amotl2a/cacna1c/dcn/fzd2/gpc4/grhl1/LOC122865952/LOC122869123/LOC122870658/LOC122871826/LOC122877917/LOC122882907/LOC122882909/LOC122888062/pard6gb/phldb2b/sapcd1/skib/snai2/sox4b/tnca/vegfc	9	gene-dcn/gene-grhl1/gene-LOC122869123/gene-LOC122870658/gene-LOC122877917/gene-LOC122882907/gene-LOC122882909/gene-LOC122888062/gene-sapcd1	13
BP	GO:0045103	intermediate filament-based process	3/646	23/11595	0.133607794334136	0.679292761876716	gene-evpla/gene-LOC122878341/gene-ppl	3	evpla/LOC122878341/ppl	2	gene-evpla/gene-ppl	1
BP	GO:0045104	intermediate filament cytoskeleton organization	3/646	23/11595	0.133607794334136	0.679292761876716	gene-evpla/gene-LOC122878341/gene-ppl	3	evpla/LOC122878341/ppl	2	gene-evpla/gene-ppl	1
BP	GO:0045930	negative regulation of mitotic cell cycle	5/646	49/11595	0.135561995836394	0.679292761876716	gene-brinp3a.2/gene-LOC122877917/gene-LOC122887176/gene-id2a/gene-LOC122865952	5	brinp3a.2/id2a/LOC122865952/LOC122877917/LOC122887176	1	gene-LOC122877917	4
BP	GO:0030182	neuron differentiation	26/646	372/11595	0.137267145008202	0.679292761876716	gene-LOC122872091/gene-nptx1l/gene-vegfc/gene-emb/gene-srrm4/gene-brinp3a.2/gene-ndnf/gene-LOC122877917/gene-omgb/gene-znf296/gene-spartb/gene-myot/gene-LOC122887176/gene-LOC122888546/gene-id2a/gene-pard6gb/gene-tnca/gene-dok6/gene-boc/gene-dpysl4/gene-LOC122867164/gene-LOC122869123/gene-si:ch211-278a6.1/gene-mrtfbb/gene-LOC122870091/gene-rpgrb	26	boc/brinp3a.2/dok6/dpysl4/emb/id2a/LOC122867164/LOC122869123/LOC122870091/LOC122872091/LOC122877917/LOC122887176/LOC122888546/mrtfbb/myot/ndnf/nptx1l/omgb/pard6gb/rpgrb/si:ch211-278a6.1/spartb/srrm4/tnca/vegfc/znf296	12	gene-dok6/gene-dpysl4/gene-emb/gene-LOC122869123/gene-LOC122870091/gene-LOC122877917/gene-myot/gene-nptx1l/gene-omgb/gene-si:ch211-278a6.1/gene-spartb/gene-srrm4	14
BP	GO:0002253	activation of immune response	6/646	63/11595	0.137386742567848	0.679292761876716	gene-tespa1/gene-LOC122873342/gene-LOC122868841/gene-LOC122870587/gene-LOC122869735/gene-LOC122869738	6	LOC122868841/LOC122869735/LOC122869738/LOC122870587/LOC122873342/tespa1	5	gene-LOC122868841/gene-LOC122869735/gene-LOC122869738/gene-LOC122870587/gene-LOC122873342	1
BP	GO:0032787	monocarboxylic acid metabolic process	14/646	182/11595	0.137923041091142	0.679292761876716	gene-hal/gene-gpia/gene-gck/gene-aldob/gene-aldh5a1/gene-gapdhs/gene-scdb/gene-acaca/gene-lpin1b/gene-LOC122866220/gene-scd/gene-fasn/gene-nupr1b/gene-LOC122871599	14	acaca/aldh5a1/aldob/fasn/gapdhs/gck/gpia/hal/LOC122866220/LOC122871599/lpin1b/nupr1b/scd/scdb	14	gene-acaca/gene-aldh5a1/gene-aldob/gene-fasn/gene-gapdhs/gene-gck/gene-gpia/gene-hal/gene-LOC122866220/gene-LOC122871599/gene-lpin1b/gene-nupr1b/gene-scd/gene-scdb	0
BP	GO:0042391	regulation of membrane potential	4/646	36/11595	0.138328570296554	0.679292761876716	gene-tusc2a/gene-tpcn3/gene-pid1/gene-spartb	4	pid1/spartb/tpcn3/tusc2a	3	gene-spartb/gene-tpcn3/gene-tusc2a	1
BP	GO:0051271	negative regulation of cellular component movement	4/646	36/11595	0.138328570296554	0.679292761876716	gene-podn/gene-LOC122877917/gene-phldb2b/gene-tafa5a	4	LOC122877917/phldb2b/podn/tafa5a	2	gene-LOC122877917/gene-podn	2
BP	GO:2000146	negative regulation of cell motility	4/646	36/11595	0.138328570296554	0.679292761876716	gene-podn/gene-LOC122877917/gene-phldb2b/gene-tafa5a	4	LOC122877917/phldb2b/podn/tafa5a	2	gene-LOC122877917/gene-podn	2
BP	GO:0051345	positive regulation of hydrolase activity	17/646	229/11595	0.139060879019938	0.679292761876716	gene-tbc1d9/gene-si:dkey-91m11.5/gene-arhgap25/gene-sgsm1a/gene-rap1gap2a/gene-LOC122881737/gene-rasgrp3/gene-asap1a/gene-zmp:0000001168/gene-LOC122864981/gene-arhgap24/gene-arhgap27/gene-si:dkey-191m6.4/gene-rundc1/gene-sgsm3/gene-LOC122869489/gene-tbc1d30	17	arhgap24/arhgap25/arhgap27/asap1a/LOC122864981/LOC122869489/LOC122881737/rap1gap2a/rasgrp3/rundc1/sgsm1a/sgsm3/si:dkey-191m6.4/si:dkey-91m11.5/tbc1d30/tbc1d9/zmp:0000001168	11	gene-arhgap25/gene-asap1a/gene-LOC122864981/gene-rap1gap2a/gene-rasgrp3/gene-rundc1/gene-sgsm1a/gene-sgsm3/gene-si:dkey-191m6.4/gene-tbc1d30/gene-zmp:0000001168	6
BP	GO:0003205	cardiac chamber development	2/646	12/11595	0.14144155689502	0.679292761876716	gene-cadm4/gene-LOC122888062	2	cadm4/LOC122888062	2	gene-cadm4/gene-LOC122888062	0
BP	GO:0006040	amino sugar metabolic process	2/646	12/11595	0.14144155689502	0.679292761876716	gene-gfpt2/gene-LOC122883755	2	gfpt2/LOC122883755	2	gene-gfpt2/gene-LOC122883755	0
BP	GO:0006560	proline metabolic process	2/646	12/11595	0.14144155689502	0.679292761876716	gene-oat/gene-aldh18a1	2	aldh18a1/oat	2	gene-aldh18a1/gene-oat	0
BP	GO:0016241	regulation of macroautophagy	2/646	12/11595	0.14144155689502	0.679292761876716	gene-LOC122886528/gene-nupr1b	2	LOC122886528/nupr1b	2	gene-LOC122886528/gene-nupr1b	0
BP	GO:0030201	heparan sulfate proteoglycan metabolic process	2/646	12/11595	0.14144155689502	0.679292761876716	gene-sulf2a/gene-LOC122863823	2	LOC122863823/sulf2a	1	gene-sulf2a	1
BP	GO:0031279	regulation of cyclase activity	2/646	12/11595	0.14144155689502	0.679292761876716	gene-adgrv1/gene-zgc:162144	2	adgrv1/zgc:162144	2	gene-adgrv1/gene-zgc:162144	0
BP	GO:0032922	circadian regulation of gene expression	2/646	12/11595	0.14144155689502	0.679292761876716	gene-LOC122875367/gene-otx5	2	LOC122875367/otx5	1	gene-otx5	1
BP	GO:0040001	establishment of mitotic spindle localization	2/646	12/11595	0.14144155689502	0.679292761876716	gene-LOC122877630/gene-sapcd1	2	LOC122877630/sapcd1	2	gene-LOC122877630/gene-sapcd1	0
BP	GO:0046847	filopodium assembly	2/646	12/11595	0.14144155689502	0.679292761876716	gene-LOC122878127/gene-amotl2a	2	amotl2a/LOC122878127	1	gene-LOC122878127	1
BP	GO:0048013	ephrin receptor signaling pathway	2/646	12/11595	0.14144155689502	0.679292761876716	gene-efna1a/gene-LOC122865520	2	efna1a/LOC122865520	1	gene-efna1a	1
BP	GO:0051293	establishment of spindle localization	2/646	12/11595	0.14144155689502	0.679292761876716	gene-LOC122877630/gene-sapcd1	2	LOC122877630/sapcd1	2	gene-LOC122877630/gene-sapcd1	0
BP	GO:0051339	regulation of lyase activity	2/646	12/11595	0.14144155689502	0.679292761876716	gene-adgrv1/gene-zgc:162144	2	adgrv1/zgc:162144	2	gene-adgrv1/gene-zgc:162144	0
BP	GO:0051653	spindle localization	2/646	12/11595	0.14144155689502	0.679292761876716	gene-LOC122877630/gene-sapcd1	2	LOC122877630/sapcd1	2	gene-LOC122877630/gene-sapcd1	0
BP	GO:0071711	basement membrane organization	2/646	12/11595	0.14144155689502	0.679292761876716	gene-lamb3/gene-phldb2b	2	lamb3/phldb2b	1	gene-lamb3	1
BP	GO:1905269	positive regulation of chromatin organization	2/646	12/11595	0.14144155689502	0.679292761876716	gene-znf703/gene-snai2	2	snai2/znf703	0	-	2
BP	GO:0080134	regulation of response to stress	16/646	214/11595	0.141664269923572	0.679292761876716	gene-tlr3/gene-metrnlb/gene-LOC122878212/gene-LOC122878127/gene-LOC122877917/gene-omgb/gene-snai2/gene-klhl43/gene-phldb2b/gene-nupr1b/gene-ifi35/gene-cbx8a/gene-LOC122868714/gene-LOC122869242/gene-bcl6b/gene-tafa5a	16	bcl6b/cbx8a/ifi35/klhl43/LOC122868714/LOC122869242/LOC122877917/LOC122878127/LOC122878212/metrnlb/nupr1b/omgb/phldb2b/snai2/tafa5a/tlr3	10	gene-bcl6b/gene-ifi35/gene-klhl43/gene-LOC122869242/gene-LOC122877917/gene-LOC122878127/gene-LOC122878212/gene-metrnlb/gene-nupr1b/gene-omgb	6
BP	GO:0010628	positive regulation of gene expression	9/646	107/11595	0.141782617159152	0.679292761876716	gene-tusc2a/gene-tlr3/gene-LOC122878127/gene-LOC122877917/gene-znf296/gene-LOC122886518/gene-tnca/gene-wbp2/gene-LOC122872132	9	LOC122872132/LOC122877917/LOC122878127/LOC122886518/tlr3/tnca/tusc2a/wbp2/znf296	5	gene-LOC122877917/gene-LOC122878127/gene-LOC122886518/gene-tusc2a/gene-wbp2	4
BP	GO:0030041	actin filament polymerization	9/646	107/11595	0.141782617159152	0.679292761876716	gene-LOC122885147/gene-LOC122872091/gene-LOC122879509/gene-tmod4/gene-fmn2a/gene-LOC122861414/gene-fmn1/gene-baiap2l1a/gene-LOC122867164	9	baiap2l1a/fmn1/fmn2a/LOC122861414/LOC122867164/LOC122872091/LOC122879509/LOC122885147/tmod4	6	gene-baiap2l1a/gene-fmn1/gene-LOC122861414/gene-LOC122879509/gene-LOC122885147/gene-tmod4	3
BP	GO:0034976	response to endoplasmic reticulum stress	5/646	50/11595	0.144180761175004	0.688863636725019	gene-ddit3/gene-LOC122878127/gene-LOC122886518/gene-eif2ak3/gene-nupr1b	5	ddit3/eif2ak3/LOC122878127/LOC122886518/nupr1b	5	gene-ddit3/gene-eif2ak3/gene-LOC122878127/gene-LOC122886518/gene-nupr1b	0
BP	GO:0042113	B cell activation	3/646	24/11595	0.146735048134015	0.69146378846714	gene-swap70a/gene-LOC122878127/gene-znf296	3	LOC122878127/swap70a/znf296	1	gene-LOC122878127	2
BP	GO:0060326	cell chemotaxis	3/646	24/11595	0.146735048134015	0.69146378846714	gene-swap70a/gene-LOC122873767/gene-snai2	3	LOC122873767/snai2/swap70a	1	gene-LOC122873767	2
BP	GO:0071214	cellular response to abiotic stimulus	3/646	24/11595	0.146735048134015	0.69146378846714	gene-grk1a/gene-LOC122878127/gene-snai2	3	grk1a/LOC122878127/snai2	2	gene-grk1a/gene-LOC122878127	1
BP	GO:0072528	pyrimidine-containing compound biosynthetic process	3/646	24/11595	0.146735048134015	0.69146378846714	gene-dut/gene-nme5/gene-cmpk2	3	cmpk2/dut/nme5	2	gene-cmpk2/gene-nme5	1
BP	GO:0104004	cellular response to environmental stimulus	3/646	24/11595	0.146735048134015	0.69146378846714	gene-grk1a/gene-LOC122878127/gene-snai2	3	grk1a/LOC122878127/snai2	2	gene-grk1a/gene-LOC122878127	1
BP	GO:0009968	negative regulation of signal transduction	22/646	311/11595	0.148090743837489	0.69594557213246	gene-pmepa1/gene-sulf2a/gene-LOC122874938/gene-LOC122874995/gene-LOC122877917/gene-pid1/gene-spartb/gene-si:ch211-39i2.2/gene-sox4b/gene-dact2/gene-LOC122884781/gene-LOC122884881/gene-snai2/gene-tmem88a/gene-LOC122862418/gene-klhl43/gene-LOC122865952/gene-bambia/gene-nog2/gene-ifi35/gene-LOC122869242/gene-LOC122871826	22	bambia/dact2/ifi35/klhl43/LOC122862418/LOC122865952/LOC122869242/LOC122871826/LOC122874938/LOC122874995/LOC122877917/LOC122884781/LOC122884881/nog2/pid1/pmepa1/si:ch211-39i2.2/snai2/sox4b/spartb/sulf2a/tmem88a	9	gene-ifi35/gene-klhl43/gene-LOC122869242/gene-LOC122874995/gene-LOC122877917/gene-LOC122884781/gene-si:ch211-39i2.2/gene-spartb/gene-sulf2a	13
BP	GO:0071695	anatomical structure maturation	4/646	37/11595	0.148702276374642	0.696915300720391	gene-tusc2a/gene-srrm4/gene-znf296/gene-tdrd6	4	srrm4/tdrd6/tusc2a/znf296	3	gene-srrm4/gene-tdrd6/gene-tusc2a	1
BP	GO:0050778	positive regulation of immune response	7/646	79/11595	0.150062222461534	0.7013777788963	gene-tespa1/gene-LOC122873342/gene-LOC122868841/gene-ifi35/gene-LOC122870587/gene-LOC122869735/gene-LOC122869738	7	ifi35/LOC122868841/LOC122869735/LOC122869738/LOC122870587/LOC122873342/tespa1	6	gene-ifi35/gene-LOC122868841/gene-LOC122869735/gene-LOC122869738/gene-LOC122870587/gene-LOC122873342	1
BP	GO:0010648	negative regulation of cell communication	22/646	313/11595	0.154919872659227	0.704026176984416	gene-pmepa1/gene-sulf2a/gene-LOC122874938/gene-LOC122874995/gene-LOC122877917/gene-pid1/gene-spartb/gene-si:ch211-39i2.2/gene-sox4b/gene-dact2/gene-LOC122884781/gene-LOC122884881/gene-snai2/gene-tmem88a/gene-LOC122862418/gene-klhl43/gene-LOC122865952/gene-bambia/gene-nog2/gene-ifi35/gene-LOC122869242/gene-LOC122871826	22	bambia/dact2/ifi35/klhl43/LOC122862418/LOC122865952/LOC122869242/LOC122871826/LOC122874938/LOC122874995/LOC122877917/LOC122884781/LOC122884881/nog2/pid1/pmepa1/si:ch211-39i2.2/snai2/sox4b/spartb/sulf2a/tmem88a	9	gene-ifi35/gene-klhl43/gene-LOC122869242/gene-LOC122874995/gene-LOC122877917/gene-LOC122884781/gene-si:ch211-39i2.2/gene-spartb/gene-sulf2a	13
BP	GO:0023057	negative regulation of signaling	22/646	313/11595	0.154919872659227	0.704026176984416	gene-pmepa1/gene-sulf2a/gene-LOC122874938/gene-LOC122874995/gene-LOC122877917/gene-pid1/gene-spartb/gene-si:ch211-39i2.2/gene-sox4b/gene-dact2/gene-LOC122884781/gene-LOC122884881/gene-snai2/gene-tmem88a/gene-LOC122862418/gene-klhl43/gene-LOC122865952/gene-bambia/gene-nog2/gene-ifi35/gene-LOC122869242/gene-LOC122871826	22	bambia/dact2/ifi35/klhl43/LOC122862418/LOC122865952/LOC122869242/LOC122871826/LOC122874938/LOC122874995/LOC122877917/LOC122884781/LOC122884881/nog2/pid1/pmepa1/si:ch211-39i2.2/snai2/sox4b/spartb/sulf2a/tmem88a	9	gene-ifi35/gene-klhl43/gene-LOC122869242/gene-LOC122874995/gene-LOC122877917/gene-LOC122884781/gene-si:ch211-39i2.2/gene-spartb/gene-sulf2a	13
BP	GO:0014706	striated muscle tissue development	7/646	80/11595	0.157113744324409	0.704026176984416	gene-eya2/gene-lrrc39/gene-tmem88a/gene-pdzph1/gene-nupr1b/gene-mrtfbb/gene-cacna1c	7	cacna1c/eya2/lrrc39/mrtfbb/nupr1b/pdzph1/tmem88a	3	gene-lrrc39/gene-nupr1b/gene-pdzph1	4
BP	GO:0008543	fibroblast growth factor receptor signaling pathway	4/646	38/11595	0.159364249480336	0.704026176984416	gene-fgf7/gene-sulf2a/gene-LOC122888753/gene-sp8a	4	fgf7/LOC122888753/sp8a/sulf2a	2	gene-LOC122888753/gene-sulf2a	2
BP	GO:0045664	regulation of neuron differentiation	4/646	38/11595	0.159364249480336	0.704026176984416	gene-brinp3a.2/gene-znf296/gene-LOC122887176/gene-id2a	4	brinp3a.2/id2a/LOC122887176/znf296	0	-	4
BP	GO:2000026	regulation of multicellular organismal development	14/646	187/11595	0.160042323900868	0.704026176984416	gene-rflna/gene-LOC122878127/gene-LOC122877917/gene-rflnb/gene-znf296/gene-spartb/gene-LOC122881519/gene-zbtb46/gene-snai2/gene-tgfb3/gene-phldb2b/gene-nupr1b/gene-lrrc17/gene-tafa5a	14	LOC122877917/LOC122878127/LOC122881519/lrrc17/nupr1b/phldb2b/rflna/rflnb/snai2/spartb/tafa5a/tgfb3/zbtb46/znf296	5	gene-LOC122877917/gene-LOC122878127/gene-LOC122881519/gene-nupr1b/gene-spartb	9
BP	GO:0043542	endothelial cell migration	3/646	25/11595	0.160259891231579	0.704026176984416	gene-vegfc/gene-LOC122877917/gene-snai2	3	LOC122877917/snai2/vegfc	1	gene-LOC122877917	2
BP	GO:0072009	nephron epithelium development	3/646	25/11595	0.160259891231579	0.704026176984416	gene-LOC122870658/gene-LOC122888062/gene-LOC122865952	3	LOC122865952/LOC122870658/LOC122888062	2	gene-LOC122870658/gene-LOC122888062	1
BP	GO:0051494	negative regulation of cytoskeleton organization	6/646	66/11595	0.160617540906688	0.704026176984416	gene-swap70a/gene-LOC122885147/gene-LOC122878127/gene-LOC122879509/gene-tmod4/gene-phldb2b	6	LOC122878127/LOC122879509/LOC122885147/phldb2b/swap70a/tmod4	4	gene-LOC122878127/gene-LOC122879509/gene-LOC122885147/gene-tmod4	2
BP	GO:1902904	negative regulation of supramolecular fiber organization	6/646	66/11595	0.160617540906688	0.704026176984416	gene-swap70a/gene-LOC122885147/gene-LOC122878127/gene-LOC122879509/gene-tmod4/gene-phldb2b	6	LOC122878127/LOC122879509/LOC122885147/phldb2b/swap70a/tmod4	4	gene-LOC122878127/gene-LOC122879509/gene-LOC122885147/gene-tmod4	2
BP	GO:0000097	sulfur amino acid biosynthetic process	2/646	13/11595	0.161271112634802	0.704026176984416	gene-LOC122876938/gene-cbsa	2	cbsa/LOC122876938	2	gene-cbsa/gene-LOC122876938	0
BP	GO:0003014	renal system process	2/646	13/11595	0.161271112634802	0.704026176984416	gene-LOC122870658/gene-ctns	2	ctns/LOC122870658	2	gene-ctns/gene-LOC122870658	0
BP	GO:0009067	aspartate family amino acid biosynthetic process	2/646	13/11595	0.161271112634802	0.704026176984416	gene-LOC122876938/gene-asns	2	asns/LOC122876938	2	gene-asns/gene-LOC122876938	0
BP	GO:0009409	response to cold	2/646	13/11595	0.161271112634802	0.704026176984416	gene-metrnlb/gene-LOC122868714	2	LOC122868714/metrnlb	1	gene-metrnlb	1
BP	GO:0010508	positive regulation of autophagy	2/646	13/11595	0.161271112634802	0.704026176984416	gene-LOC122886528/gene-dcn	2	dcn/LOC122886528	2	gene-dcn/gene-LOC122886528	0
BP	GO:0018149	peptide cross-linking	2/646	13/11595	0.161271112634802	0.704026176984416	gene-tgm2b/gene-ndnf	2	ndnf/tgm2b	0	-	2
BP	GO:0040029	regulation of gene expression, epigenetic	2/646	13/11595	0.161271112634802	0.704026176984416	gene-wbp2/gene-cbx8a	2	cbx8a/wbp2	1	gene-wbp2	1
BP	GO:0043281	regulation of cysteine-type endopeptidase activity involved in apoptotic process	2/646	13/11595	0.161271112634802	0.704026176984416	gene-LOC122877917/gene-LOC122881737	2	LOC122877917/LOC122881737	1	gene-LOC122877917	1
BP	GO:0045861	negative regulation of proteolysis	2/646	13/11595	0.161271112634802	0.704026176984416	gene-LOC122878127/gene-LOC122877917	2	LOC122877917/LOC122878127	2	gene-LOC122877917/gene-LOC122878127	0
BP	GO:0048268	clathrin coat assembly	2/646	13/11595	0.161271112634802	0.704026176984416	gene-snap91a/gene-LOC122888042	2	LOC122888042/snap91a	2	gene-LOC122888042/gene-snap91a	0
BP	GO:0051492	regulation of stress fiber assembly	2/646	13/11595	0.161271112634802	0.704026176984416	gene-LOC122878127/gene-phldb2b	2	LOC122878127/phldb2b	1	gene-LOC122878127	1
BP	GO:0060840	artery development	2/646	13/11595	0.161271112634802	0.704026176984416	gene-amotl2a/gene-pthlha	2	amotl2a/pthlha	0	-	2
BP	GO:0099175	regulation of postsynapse organization	2/646	13/11595	0.161271112634802	0.704026176984416	gene-nptx1l/gene-si:ch211-278a6.1	2	nptx1l/si:ch211-278a6.1	2	gene-nptx1l/gene-si:ch211-278a6.1	0
BP	GO:1902807	negative regulation of cell cycle G1/S phase transition	2/646	13/11595	0.161271112634802	0.704026176984416	gene-LOC122877917/gene-LOC122865952	2	LOC122865952/LOC122877917	1	gene-LOC122877917	1
BP	GO:1903035	negative regulation of response to wounding	2/646	13/11595	0.161271112634802	0.704026176984416	gene-phldb2b/gene-tafa5a	2	phldb2b/tafa5a	0	-	2
BP	GO:2000134	negative regulation of G1/S transition of mitotic cell cycle	2/646	13/11595	0.161271112634802	0.704026176984416	gene-LOC122877917/gene-LOC122865952	2	LOC122865952/LOC122877917	1	gene-LOC122877917	1
BP	GO:0098542	defense response to other organism	16/646	219/11595	0.162282779619933	0.706649065686796	gene-tusc2a/gene-tlr3/gene-nlrc5/gene-LOC122878212/gene-ptx3a/gene-LOC122881737/gene-LOC122881776/gene-ifih1/gene-rsad2/gene-LOC122868174/gene-ch25h/gene-LOC122868841/gene-ifi35/gene-dhx58/gene-LOC122869242/gene-dram1	16	ch25h/dhx58/dram1/ifi35/ifih1/LOC122868174/LOC122868841/LOC122869242/LOC122878212/LOC122881737/LOC122881776/nlrc5/ptx3a/rsad2/tlr3/tusc2a	14	gene-ch25h/gene-dhx58/gene-dram1/gene-ifi35/gene-ifih1/gene-LOC122868174/gene-LOC122868841/gene-LOC122869242/gene-LOC122878212/gene-LOC122881776/gene-nlrc5/gene-ptx3a/gene-rsad2/gene-tusc2a	2
BP	GO:0022411	cellular component disassembly	8/646	96/11595	0.16568605100257	0.718522638917707	gene-swap70a/gene-LOC122878127/gene-LOC122879509/gene-tmod4/gene-retreg1/gene-LOC122886528/gene-snai2/gene-LOC122871423	8	LOC122871423/LOC122878127/LOC122879509/LOC122886528/retreg1/snai2/swap70a/tmod4	6	gene-LOC122871423/gene-LOC122878127/gene-LOC122879509/gene-LOC122886528/gene-retreg1/gene-tmod4	2
BP	GO:1901700	response to oxygen-containing compound	15/646	204/11595	0.165845050959494	0.718522638917707	gene-LOC122864683/gene-nptx1l/gene-LOC122878127/gene-LOC122877917/gene-pid1/gene-irs2b/gene-snai2/gene-cmpk2/gene-tnca/gene-LOC122865952/gene-baiap2l1a/gene-LOC122868820/gene-cbx8a/gene-LOC122869242/gene-si:ch73-335l21.1	15	baiap2l1a/cbx8a/cmpk2/irs2b/LOC122864683/LOC122865952/LOC122868820/LOC122869242/LOC122877917/LOC122878127/nptx1l/pid1/si:ch73-335l21.1/snai2/tnca	7	gene-baiap2l1a/gene-cmpk2/gene-LOC122864683/gene-LOC122869242/gene-LOC122877917/gene-LOC122878127/gene-nptx1l	8
BP	GO:0051336	regulation of hydrolase activity	20/646	284/11595	0.166629104224903	0.719827511121862	gene-tbc1d9/gene-ppp1r27b/gene-si:dkey-91m11.5/gene-arhgap25/gene-sgsm1a/gene-LOC122877917/gene-rap1gap2a/gene-zgc:92242/gene-LOC122881737/gene-rasgrp3/gene-asap1a/gene-zmp:0000001168/gene-LOC122864981/gene-arhgap24/gene-arhgap27/gene-si:dkey-191m6.4/gene-rundc1/gene-sgsm3/gene-LOC122869489/gene-tbc1d30	20	arhgap24/arhgap25/arhgap27/asap1a/LOC122864981/LOC122869489/LOC122877917/LOC122881737/ppp1r27b/rap1gap2a/rasgrp3/rundc1/sgsm1a/sgsm3/si:dkey-191m6.4/si:dkey-91m11.5/tbc1d30/tbc1d9/zgc:92242/zmp:0000001168	14	gene-arhgap25/gene-asap1a/gene-LOC122864981/gene-LOC122877917/gene-ppp1r27b/gene-rap1gap2a/gene-rasgrp3/gene-rundc1/gene-sgsm1a/gene-sgsm3/gene-si:dkey-191m6.4/gene-tbc1d30/gene-zgc:92242/gene-zmp:0000001168	6
BP	GO:0050877	nervous system process	17/646	236/11595	0.166983242405595	0.719827511121862	gene-LOC122880129/gene-grk1a/gene-LOC122887291/gene-nptx1l/gene-LOC122878347/gene-spartb/gene-zgc:162144/gene-crybb1l1/gene-cryba2b/gene-impg2a/gene-nyx/gene-snai2/gene-LOC122862702/gene-LOC122863926/gene-LOC122865803/gene-myo15b/gene-LOC122870445	17	cryba2b/crybb1l1/grk1a/impg2a/LOC122862702/LOC122863926/LOC122865803/LOC122870445/LOC122878347/LOC122880129/LOC122887291/myo15b/nptx1l/nyx/snai2/spartb/zgc:162144	16	gene-cryba2b/gene-crybb1l1/gene-grk1a/gene-impg2a/gene-LOC122862702/gene-LOC122863926/gene-LOC122865803/gene-LOC122870445/gene-LOC122878347/gene-LOC122880129/gene-LOC122887291/gene-myo15b/gene-nptx1l/gene-nyx/gene-spartb/gene-zgc:162144	1
BP	GO:0010647	positive regulation of cell communication	14/646	189/11595	0.169380180045843	0.726234621749209	gene-tespa1/gene-sulf2a/gene-syt12/gene-angptl2b/gene-gck/gene-LOC122878127/gene-tmem198a/gene-sp8a/gene-bambia/gene-dok6/gene-nupr1b/gene-ifi35/gene-LOC122871413/gene-caprin2	14	angptl2b/bambia/caprin2/dok6/gck/ifi35/LOC122871413/LOC122878127/nupr1b/sp8a/sulf2a/syt12/tespa1/tmem198a	10	gene-caprin2/gene-dok6/gene-gck/gene-ifi35/gene-LOC122871413/gene-LOC122878127/gene-nupr1b/gene-sulf2a/gene-syt12/gene-tmem198a	4
BP	GO:0023056	positive regulation of signaling	14/646	189/11595	0.169380180045843	0.726234621749209	gene-tespa1/gene-sulf2a/gene-syt12/gene-angptl2b/gene-gck/gene-LOC122878127/gene-tmem198a/gene-sp8a/gene-bambia/gene-dok6/gene-nupr1b/gene-ifi35/gene-LOC122871413/gene-caprin2	14	angptl2b/bambia/caprin2/dok6/gck/ifi35/LOC122871413/LOC122878127/nupr1b/sp8a/sulf2a/syt12/tespa1/tmem198a	10	gene-caprin2/gene-dok6/gene-gck/gene-ifi35/gene-LOC122871413/gene-LOC122878127/gene-nupr1b/gene-sulf2a/gene-syt12/gene-tmem198a	4
BP	GO:1901136	carbohydrate derivative catabolic process	4/646	39/11595	0.170297058501582	0.726234621749209	gene-dut/gene-LOC122872164/gene-pde4ba/gene-LOC122883755	4	dut/LOC122872164/LOC122883755/pde4ba	2	gene-LOC122872164/gene-LOC122883755	2
BP	GO:0032956	regulation of actin cytoskeleton organization	10/646	127/11595	0.170324076218211	0.726234621749209	gene-swap70a/gene-LOC122885147/gene-LOC122878127/gene-LOC122879509/gene-tmod4/gene-fmn2a/gene-LOC122861414/gene-fmn1/gene-phldb2b/gene-baiap2l1a	10	baiap2l1a/fmn1/fmn2a/LOC122861414/LOC122878127/LOC122879509/LOC122885147/phldb2b/swap70a/tmod4	7	gene-baiap2l1a/gene-fmn1/gene-LOC122861414/gene-LOC122878127/gene-LOC122879509/gene-LOC122885147/gene-tmod4	3
BP	GO:0022008	neurogenesis	29/646	432/11595	0.170698042534333	0.726234621749209	gene-nav2a/gene-LOC122872091/gene-nptx1l/gene-vegfc/gene-reln/gene-emb/gene-srrm4/gene-brinp3a.2/gene-ndnf/gene-LOC122877917/gene-omgb/gene-znf296/gene-spartb/gene-myot/gene-LOC122887176/gene-LOC122888546/gene-id2a/gene-pard6gb/gene-ndrg1a/gene-tnca/gene-dok6/gene-boc/gene-dpysl4/gene-LOC122867164/gene-LOC122869123/gene-si:ch211-278a6.1/gene-mrtfbb/gene-LOC122870091/gene-rpgrb	29	boc/brinp3a.2/dok6/dpysl4/emb/id2a/LOC122867164/LOC122869123/LOC122870091/LOC122872091/LOC122877917/LOC122887176/LOC122888546/mrtfbb/myot/nav2a/ndnf/ndrg1a/nptx1l/omgb/pard6gb/reln/rpgrb/si:ch211-278a6.1/spartb/srrm4/tnca/vegfc/znf296	13	gene-dok6/gene-dpysl4/gene-emb/gene-LOC122869123/gene-LOC122870091/gene-LOC122877917/gene-myot/gene-ndrg1a/gene-nptx1l/gene-omgb/gene-si:ch211-278a6.1/gene-spartb/gene-srrm4	16
BP	GO:0008544	epidermis development	5/646	53/11595	0.171374971496444	0.726234621749209	gene-evpla/gene-LOC122877917/gene-LOC122882909/gene-LOC122882907/gene-grhl1	5	evpla/grhl1/LOC122877917/LOC122882907/LOC122882909	5	gene-evpla/gene-grhl1/gene-LOC122877917/gene-LOC122882907/gene-LOC122882909	0
BP	GO:1901698	response to nitrogen compound	9/646	112/11595	0.171818398075082	0.726234621749209	gene-LOC122864683/gene-tlr3/gene-LOC122878212/gene-LOC122878127/gene-LOC122877917/gene-pid1/gene-irs2b/gene-baiap2l1a/gene-si:ch73-335l21.1	9	baiap2l1a/irs2b/LOC122864683/LOC122877917/LOC122878127/LOC122878212/pid1/si:ch73-335l21.1/tlr3	5	gene-baiap2l1a/gene-LOC122864683/gene-LOC122877917/gene-LOC122878127/gene-LOC122878212	4
BP	GO:0030522	intracellular receptor signaling pathway	3/646	26/11595	0.174143807706634	0.726234621749209	gene-snai2/gene-LOC122864108/gene-LOC122865952	3	LOC122864108/LOC122865952/snai2	1	gene-LOC122864108	2
BP	GO:0031056	regulation of histone modification	3/646	26/11595	0.174143807706634	0.726234621749209	gene-znf703/gene-snai2/gene-gfi1aa	3	gfi1aa/snai2/znf703	1	gene-gfi1aa	2
BP	GO:0046916	cellular transition metal ion homeostasis	3/646	26/11595	0.174143807706634	0.726234621749209	gene-LOC122881776/gene-slc31a2/gene-LOC122868396	3	LOC122868396/LOC122881776/slc31a2	3	gene-LOC122868396/gene-LOC122881776/gene-slc31a2	0
BP	GO:0062197	cellular response to chemical stress	3/646	26/11595	0.174143807706634	0.726234621749209	gene-LOC122877917/gene-cbx8a/gene-nfe2l1a	3	cbx8a/LOC122877917/nfe2l1a	2	gene-LOC122877917/gene-nfe2l1a	1
BP	GO:0009150	purine ribonucleotide metabolic process	12/646	159/11595	0.176202766080032	0.726234621749209	gene-ampd3a/gene-LOC122872164/gene-gpia/gene-gck/gene-pde4ba/gene-aldob/gene-nme5/gene-gapdhs/gene-LOC122882904/gene-acaca/gene-nupr1b/gene-LOC122869764	12	acaca/aldob/ampd3a/gapdhs/gck/gpia/LOC122869764/LOC122872164/LOC122882904/nme5/nupr1b/pde4ba	9	gene-acaca/gene-aldob/gene-gapdhs/gene-gck/gene-gpia/gene-LOC122869764/gene-LOC122872164/gene-nme5/gene-nupr1b	3
BP	GO:0001816	cytokine production	10/646	128/11595	0.176222542295475	0.726234621749209	gene-tusc2a/gene-tlr3/gene-LOC122878127/gene-LOC122877917/gene-snai2/gene-LOC122869242/gene-bcl6b/gene-LOC122869735/gene-LOC122869738/gene-LOC122872132	10	bcl6b/LOC122869242/LOC122869735/LOC122869738/LOC122872132/LOC122877917/LOC122878127/snai2/tlr3/tusc2a	7	gene-bcl6b/gene-LOC122869242/gene-LOC122869735/gene-LOC122869738/gene-LOC122877917/gene-LOC122878127/gene-tusc2a	3
BP	GO:0001817	regulation of cytokine production	10/646	128/11595	0.176222542295475	0.726234621749209	gene-tusc2a/gene-tlr3/gene-LOC122878127/gene-LOC122877917/gene-snai2/gene-LOC122869242/gene-bcl6b/gene-LOC122869735/gene-LOC122869738/gene-LOC122872132	10	bcl6b/LOC122869242/LOC122869735/LOC122869738/LOC122872132/LOC122877917/LOC122878127/snai2/tlr3/tusc2a	7	gene-bcl6b/gene-LOC122869242/gene-LOC122869735/gene-LOC122869738/gene-LOC122877917/gene-LOC122878127/gene-tusc2a	3
BP	GO:0030198	extracellular matrix organization	6/646	68/11595	0.176982469928332	0.726234621749209	gene-lamb3/gene-LOC122870658/gene-ndnf/gene-gpc4/gene-LOC122865952/gene-phldb2b	6	gpc4/lamb3/LOC122865952/LOC122870658/ndnf/phldb2b	2	gene-lamb3/gene-LOC122870658	4
BP	GO:0045229	external encapsulating structure organization	6/646	68/11595	0.176982469928332	0.726234621749209	gene-lamb3/gene-LOC122870658/gene-ndnf/gene-gpc4/gene-LOC122865952/gene-phldb2b	6	gpc4/lamb3/LOC122865952/LOC122870658/ndnf/phldb2b	2	gene-lamb3/gene-LOC122870658	4
BP	GO:0034404	nucleobase-containing small molecule biosynthetic process	4/646	40/11595	0.181482941805728	0.726234621749209	gene-dut/gene-LOC122872164/gene-pde4ba/gene-nme5	4	dut/LOC122872164/nme5/pde4ba	2	gene-LOC122872164/gene-nme5	2
BP	GO:0000096	sulfur amino acid metabolic process	2/646	14/11595	0.181558655437302	0.726234621749209	gene-LOC122876938/gene-cbsa	2	cbsa/LOC122876938	2	gene-cbsa/gene-LOC122876938	0
BP	GO:0000302	response to reactive oxygen species	2/646	14/11595	0.181558655437302	0.726234621749209	gene-LOC122877917/gene-cbx8a	2	cbx8a/LOC122877917	1	gene-LOC122877917	1
BP	GO:0006171	cAMP biosynthetic process	2/646	14/11595	0.181558655437302	0.726234621749209	gene-LOC122882904/gene-LOC122869764	2	LOC122869764/LOC122882904	1	gene-LOC122869764	1
BP	GO:0009148	pyrimidine nucleoside triphosphate biosynthetic process	2/646	14/11595	0.181558655437302	0.726234621749209	gene-nme5/gene-cmpk2	2	cmpk2/nme5	2	gene-cmpk2/gene-nme5	0
BP	GO:0009880	embryonic pattern specification	2/646	14/11595	0.181558655437302	0.726234621749209	gene-amotl2a/gene-tdrd6	2	amotl2a/tdrd6	1	gene-tdrd6	1
BP	GO:0009950	dorsal/ventral axis specification	2/646	14/11595	0.181558655437302	0.726234621749209	gene-LOC122874938/gene-caprin2	2	caprin2/LOC122874938	1	gene-caprin2	1
BP	GO:0018108	peptidyl-tyrosine phosphorylation	2/646	14/11595	0.181558655437302	0.726234621749209	gene-dok7b/gene-LOC122869123	2	dok7b/LOC122869123	1	gene-LOC122869123	1
BP	GO:0030166	proteoglycan biosynthetic process	2/646	14/11595	0.181558655437302	0.726234621749209	gene-gpc4/gene-LOC122863823	2	gpc4/LOC122863823	0	-	2
BP	GO:0040036	regulation of fibroblast growth factor receptor signaling pathway	2/646	14/11595	0.181558655437302	0.726234621749209	gene-sulf2a/gene-sp8a	2	sp8a/sulf2a	1	gene-sulf2a	1
BP	GO:0046890	regulation of lipid biosynthetic process	2/646	14/11595	0.181558655437302	0.726234621749209	gene-ddit3/gene-snai2	2	ddit3/snai2	1	gene-ddit3	1
BP	GO:0048640	negative regulation of developmental growth	2/646	14/11595	0.181558655437302	0.726234621749209	gene-znf296/gene-spartb	2	spartb/znf296	1	gene-spartb	1
BP	GO:0051092	positive regulation of NF-kappaB transcription factor activity	2/646	14/11595	0.181558655437302	0.726234621749209	gene-zmp:0000000896/gene-LOC122872132	2	LOC122872132/zmp:0000000896	0	-	2
BP	GO:0052652	cyclic purine nucleotide metabolic process	2/646	14/11595	0.181558655437302	0.726234621749209	gene-LOC122882904/gene-LOC122869764	2	LOC122869764/LOC122882904	1	gene-LOC122869764	1
BP	GO:1905897	regulation of response to endoplasmic reticulum stress	2/646	14/11595	0.181558655437302	0.726234621749209	gene-LOC122878127/gene-nupr1b	2	LOC122878127/nupr1b	2	gene-LOC122878127/gene-nupr1b	0
BP	GO:0048699	generation of neurons	27/646	403/11595	0.183637594247431	0.732846083771649	gene-LOC122872091/gene-nptx1l/gene-vegfc/gene-reln/gene-emb/gene-srrm4/gene-brinp3a.2/gene-ndnf/gene-LOC122877917/gene-omgb/gene-znf296/gene-spartb/gene-myot/gene-LOC122887176/gene-LOC122888546/gene-id2a/gene-pard6gb/gene-tnca/gene-dok6/gene-boc/gene-dpysl4/gene-LOC122867164/gene-LOC122869123/gene-si:ch211-278a6.1/gene-mrtfbb/gene-LOC122870091/gene-rpgrb	27	boc/brinp3a.2/dok6/dpysl4/emb/id2a/LOC122867164/LOC122869123/LOC122870091/LOC122872091/LOC122877917/LOC122887176/LOC122888546/mrtfbb/myot/ndnf/nptx1l/omgb/pard6gb/reln/rpgrb/si:ch211-278a6.1/spartb/srrm4/tnca/vegfc/znf296	12	gene-dok6/gene-dpysl4/gene-emb/gene-LOC122869123/gene-LOC122870091/gene-LOC122877917/gene-myot/gene-nptx1l/gene-omgb/gene-si:ch211-278a6.1/gene-spartb/gene-srrm4	15
BP	GO:0033993	response to lipid	9/646	114/11595	0.184598592899213	0.734975879135754	gene-LOC122878127/gene-LOC122877917/gene-snai2/gene-cmpk2/gene-paqr8/gene-tnca/gene-LOC122865952/gene-LOC122868820/gene-LOC122869242	9	cmpk2/LOC122865952/LOC122868820/LOC122869242/LOC122877917/LOC122878127/paqr8/snai2/tnca	5	gene-cmpk2/gene-LOC122869242/gene-LOC122877917/gene-LOC122878127/gene-paqr8	4
BP	GO:0043062	extracellular structure organization	6/646	69/11595	0.185409224987537	0.73645208469917	gene-lamb3/gene-LOC122870658/gene-ndnf/gene-gpc4/gene-LOC122865952/gene-phldb2b	6	gpc4/lamb3/LOC122865952/LOC122870658/ndnf/phldb2b	2	gene-lamb3/gene-LOC122870658	4
BP	GO:0008064	regulation of actin polymerization or depolymerization	8/646	99/11595	0.18625387025822	0.73645208469917	gene-swap70a/gene-LOC122885147/gene-LOC122879509/gene-tmod4/gene-fmn2a/gene-LOC122861414/gene-fmn1/gene-baiap2l1a	8	baiap2l1a/fmn1/fmn2a/LOC122861414/LOC122879509/LOC122885147/swap70a/tmod4	6	gene-baiap2l1a/gene-fmn1/gene-LOC122861414/gene-LOC122879509/gene-LOC122885147/gene-tmod4	2
BP	GO:0030832	regulation of actin filament length	8/646	99/11595	0.18625387025822	0.73645208469917	gene-swap70a/gene-LOC122885147/gene-LOC122879509/gene-tmod4/gene-fmn2a/gene-LOC122861414/gene-fmn1/gene-baiap2l1a	8	baiap2l1a/fmn1/fmn2a/LOC122861414/LOC122879509/LOC122885147/swap70a/tmod4	6	gene-baiap2l1a/gene-fmn1/gene-LOC122861414/gene-LOC122879509/gene-LOC122885147/gene-tmod4	2
BP	GO:0055082	cellular chemical homeostasis	7/646	84/11595	0.186763449540451	0.736725953281079	gene-swap70a/gene-nptx1l/gene-gck/gene-LOC122878127/gene-LOC122881776/gene-slc31a2/gene-LOC122868396	7	gck/LOC122868396/LOC122878127/LOC122881776/nptx1l/slc31a2/swap70a	6	gene-gck/gene-LOC122868396/gene-LOC122878127/gene-LOC122881776/gene-nptx1l/gene-slc31a2	1
BP	GO:0055086	nucleobase-containing small molecule metabolic process	19/646	273/11595	0.187179791618507	0.736725953281079	gene-dut/gene-ampd3a/gene-LOC122872164/gene-pnp6/gene-gpia/gene-gda/gene-gck/gene-pde4ba/gene-zgc:162144/gene-macrod1/gene-aldob/gene-gfpt2/gene-nme5/gene-gapdhs/gene-LOC122882904/gene-acaca/gene-cmpk2/gene-nupr1b/gene-LOC122869764	19	acaca/aldob/ampd3a/cmpk2/dut/gapdhs/gck/gda/gfpt2/gpia/LOC122869764/LOC122872164/LOC122882904/macrod1/nme5/nupr1b/pde4ba/pnp6/zgc:162144	15	gene-acaca/gene-aldob/gene-cmpk2/gene-gapdhs/gene-gck/gene-gda/gene-gfpt2/gene-gpia/gene-LOC122869764/gene-LOC122872164/gene-macrod1/gene-nme5/gene-nupr1b/gene-pnp6/gene-zgc:162144	4
BP	GO:0032970	regulation of actin filament-based process	10/646	130/11595	0.188300012023286	0.737949544407296	gene-swap70a/gene-LOC122885147/gene-LOC122878127/gene-LOC122879509/gene-tmod4/gene-fmn2a/gene-LOC122861414/gene-fmn1/gene-phldb2b/gene-baiap2l1a	10	baiap2l1a/fmn1/fmn2a/LOC122861414/LOC122878127/LOC122879509/LOC122885147/phldb2b/swap70a/tmod4	7	gene-baiap2l1a/gene-fmn1/gene-LOC122861414/gene-LOC122878127/gene-LOC122879509/gene-LOC122885147/gene-tmod4	3
BP	GO:0022408	negative regulation of cell-cell adhesion	3/646	27/11595	0.188348749996978	0.737949544407296	gene-swap70a/gene-LOC122878127/gene-LOC122877917	3	LOC122877917/LOC122878127/swap70a	2	gene-LOC122877917/gene-LOC122878127	1
BP	GO:0008015	blood circulation	9/646	115/11595	0.191142728987458	0.747194304223698	gene-parvb/gene-lrrc39/gene-LOC122878127/gene-nkx2.5/gene-LOC122863516/gene-edn1/gene-pdzph1/gene-pawr/gene-cacna1c	9	cacna1c/edn1/LOC122863516/LOC122878127/lrrc39/nkx2.5/parvb/pawr/pdzph1	4	gene-LOC122878127/gene-lrrc39/gene-parvb/gene-pdzph1	5
BP	GO:0006869	lipid transport	10/646	131/11595	0.194474743809328	0.753523308336094	gene-atp8b4/gene-LOC122875390/gene-LOC122876099/gene-osbpl3b/gene-esyt1a/gene-LOC122883087/gene-LOC122865700/gene-osbp2a/gene-tex2/gene-LOC122871278	10	atp8b4/esyt1a/LOC122865700/LOC122871278/LOC122875390/LOC122876099/LOC122883087/osbp2a/osbpl3b/tex2	7	gene-atp8b4/gene-LOC122865700/gene-LOC122871278/gene-LOC122875390/gene-LOC122876099/gene-LOC122883087/gene-osbp2a	3
BP	GO:0051258	protein polymerization	10/646	131/11595	0.194474743809328	0.753523308336094	gene-tppp3/gene-LOC122885147/gene-LOC122872091/gene-LOC122879509/gene-tmod4/gene-fmn2a/gene-LOC122861414/gene-fmn1/gene-baiap2l1a/gene-LOC122867164	10	baiap2l1a/fmn1/fmn2a/LOC122861414/LOC122867164/LOC122872091/LOC122879509/LOC122885147/tmod4/tppp3	6	gene-baiap2l1a/gene-fmn1/gene-LOC122861414/gene-LOC122879509/gene-LOC122885147/gene-tmod4	4
BP	GO:0001822	kidney development	7/646	85/11595	0.194514156337922	0.753523308336094	gene-sulf2a/gene-LOC122870658/gene-cxadr/gene-LOC122888062/gene-pard6gb/gene-LOC122865952/gene-cacna1c	7	cacna1c/cxadr/LOC122865952/LOC122870658/LOC122888062/pard6gb/sulf2a	4	gene-cxadr/gene-LOC122870658/gene-LOC122888062/gene-sulf2a	3
BP	GO:0072001	renal system development	7/646	85/11595	0.194514156337922	0.753523308336094	gene-sulf2a/gene-LOC122870658/gene-cxadr/gene-LOC122888062/gene-pard6gb/gene-LOC122865952/gene-cacna1c	7	cacna1c/cxadr/LOC122865952/LOC122870658/LOC122888062/pard6gb/sulf2a	4	gene-cxadr/gene-LOC122870658/gene-LOC122888062/gene-sulf2a	3
BP	GO:0043087	regulation of GTPase activity	16/646	227/11595	0.198340615743833	0.761747249784825	gene-tbc1d9/gene-si:dkey-91m11.5/gene-arhgap25/gene-sgsm1a/gene-rap1gap2a/gene-rasgrp3/gene-asap1a/gene-zmp:0000001168/gene-LOC122864981/gene-arhgap24/gene-arhgap27/gene-si:dkey-191m6.4/gene-rundc1/gene-sgsm3/gene-LOC122869489/gene-tbc1d30	16	arhgap24/arhgap25/arhgap27/asap1a/LOC122864981/LOC122869489/rap1gap2a/rasgrp3/rundc1/sgsm1a/sgsm3/si:dkey-191m6.4/si:dkey-91m11.5/tbc1d30/tbc1d9/zmp:0000001168	11	gene-arhgap25/gene-asap1a/gene-LOC122864981/gene-rap1gap2a/gene-rasgrp3/gene-rundc1/gene-sgsm1a/gene-sgsm3/gene-si:dkey-191m6.4/gene-tbc1d30/gene-zmp:0000001168	5
BP	GO:0010594	regulation of endothelial cell migration	2/646	15/11595	0.202191840952258	0.761747249784825	gene-LOC122877917/gene-snai2	2	LOC122877917/snai2	1	gene-LOC122877917	1
BP	GO:0010976	positive regulation of neuron projection development	2/646	15/11595	0.202191840952258	0.761747249784825	gene-ndnf/gene-znf296	2	ndnf/znf296	0	-	2
BP	GO:0031122	cytoplasmic microtubule organization	2/646	15/11595	0.202191840952258	0.761747249784825	gene-cep126/gene-ccdc13	2	ccdc13/cep126	1	gene-ccdc13	1
BP	GO:0042446	hormone biosynthetic process	2/646	15/11595	0.202191840952258	0.761747249784825	gene-dio1/gene-rdh8a	2	dio1/rdh8a	0	-	2
BP	GO:0046189	phenol-containing compound biosynthetic process	2/646	15/11595	0.202191840952258	0.761747249784825	gene-ddc/gene-LOC122888177	2	ddc/LOC122888177	1	gene-ddc	1
BP	GO:0061041	regulation of wound healing	2/646	15/11595	0.202191840952258	0.761747249784825	gene-phldb2b/gene-tafa5a	2	phldb2b/tafa5a	0	-	2
BP	GO:2000045	regulation of G1/S transition of mitotic cell cycle	2/646	15/11595	0.202191840952258	0.761747249784825	gene-LOC122877917/gene-LOC122865952	2	LOC122865952/LOC122877917	1	gene-LOC122877917	1
BP	GO:2001252	positive regulation of chromosome organization	2/646	15/11595	0.202191840952258	0.761747249784825	gene-znf703/gene-snai2	2	snai2/znf703	0	-	2
BP	GO:0042692	muscle cell differentiation	7/646	86/11595	0.202390548199266	0.761747249784825	gene-lrrc39/gene-gpc4/gene-tmod4/gene-myofl/gene-tmem88a/gene-pdzph1/gene-mrtfbb	7	gpc4/lrrc39/mrtfbb/myofl/pdzph1/tmem88a/tmod4	3	gene-lrrc39/gene-pdzph1/gene-tmod4	4
BP	GO:0060537	muscle tissue development	7/646	86/11595	0.202390548199266	0.761747249784825	gene-eya2/gene-lrrc39/gene-tmem88a/gene-pdzph1/gene-nupr1b/gene-mrtfbb/gene-cacna1c	7	cacna1c/eya2/lrrc39/mrtfbb/nupr1b/pdzph1/tmem88a	3	gene-lrrc39/gene-nupr1b/gene-pdzph1	4
BP	GO:0007416	synapse assembly	3/646	28/11595	0.20283734907061	0.761747249784825	gene-nptx1l/gene-pclob/gene-LOC122878127	3	LOC122878127/nptx1l/pclob	3	gene-LOC122878127/gene-nptx1l/gene-pclob	0
BP	GO:0031669	cellular response to nutrient levels	3/646	28/11595	0.20283734907061	0.761747249784825	gene-snai2/gene-tnca/gene-LOC122865952	3	LOC122865952/snai2/tnca	0	-	3
BP	GO:0070997	neuron death	3/646	28/11595	0.20283734907061	0.761747249784825	gene-ndnf/gene-dpysl4/gene-nupr1b	3	dpysl4/ndnf/nupr1b	2	gene-dpysl4/gene-nupr1b	1
BP	GO:0003013	circulatory system process	9/646	117/11595	0.204525157930822	0.763149509119238	gene-parvb/gene-lrrc39/gene-LOC122878127/gene-nkx2.5/gene-LOC122863516/gene-edn1/gene-pdzph1/gene-pawr/gene-cacna1c	9	cacna1c/edn1/LOC122863516/LOC122878127/lrrc39/nkx2.5/parvb/pawr/pdzph1	4	gene-LOC122878127/gene-lrrc39/gene-parvb/gene-pdzph1	5
BP	GO:0021700	developmental maturation	4/646	42/11595	0.204541816106959	0.763149509119238	gene-tusc2a/gene-srrm4/gene-znf296/gene-tdrd6	4	srrm4/tdrd6/tusc2a/znf296	3	gene-srrm4/gene-tdrd6/gene-tusc2a	1
BP	GO:1902850	microtubule cytoskeleton organization involved in mitosis	4/646	42/11595	0.204541816106959	0.763149509119238	gene-LOC122877630/gene-cep126/gene-tacc2/gene-sapcd1	4	cep126/LOC122877630/sapcd1/tacc2	3	gene-LOC122877630/gene-sapcd1/gene-tacc2	1
BP	GO:0045087	innate immune response	12/646	165/11595	0.209393881520403	0.779561636829206	gene-tlr3/gene-nlrc5/gene-LOC122878212/gene-ptx3a/gene-LOC122881737/gene-ifih1/gene-rsad2/gene-LOC122868174/gene-LOC122868841/gene-ifi35/gene-dhx58/gene-LOC122869242	12	dhx58/ifi35/ifih1/LOC122868174/LOC122868841/LOC122869242/LOC122878212/LOC122881737/nlrc5/ptx3a/rsad2/tlr3	10	gene-dhx58/gene-ifi35/gene-ifih1/gene-LOC122868174/gene-LOC122868841/gene-LOC122869242/gene-LOC122878212/gene-nlrc5/gene-ptx3a/gene-rsad2	2
BP	GO:0006936	muscle contraction	5/646	57/11595	0.210383548554488	0.779836068085319	gene-sulf2a/gene-nkx2.5/gene-LOC122863516/gene-tnnt1/gene-cald1a	5	cald1a/LOC122863516/nkx2.5/sulf2a/tnnt1	2	gene-sulf2a/gene-tnnt1	3
BP	GO:0050727	regulation of inflammatory response	7/646	87/11595	0.210387559929022	0.779836068085319	gene-tlr3/gene-metrnlb/gene-nupr1b/gene-ifi35/gene-LOC122868714/gene-LOC122869242/gene-bcl6b	7	bcl6b/ifi35/LOC122868714/LOC122869242/metrnlb/nupr1b/tlr3	5	gene-bcl6b/gene-ifi35/gene-LOC122869242/gene-metrnlb/gene-nupr1b	2
BP	GO:1902903	regulation of supramolecular fiber organization	10/646	134/11595	0.213515607199353	0.779836068085319	gene-swap70a/gene-LOC122885147/gene-LOC122878127/gene-LOC122879509/gene-tmod4/gene-fmn2a/gene-LOC122861414/gene-fmn1/gene-phldb2b/gene-baiap2l1a	10	baiap2l1a/fmn1/fmn2a/LOC122861414/LOC122878127/LOC122879509/LOC122885147/phldb2b/swap70a/tmod4	7	gene-baiap2l1a/gene-fmn1/gene-LOC122861414/gene-LOC122878127/gene-LOC122879509/gene-LOC122885147/gene-tmod4	3
BP	GO:0031347	regulation of defense response	8/646	103/11595	0.215257390350606	0.779836068085319	gene-tlr3/gene-metrnlb/gene-LOC122878212/gene-nupr1b/gene-ifi35/gene-LOC122868714/gene-LOC122869242/gene-bcl6b	8	bcl6b/ifi35/LOC122868714/LOC122869242/LOC122878212/metrnlb/nupr1b/tlr3	6	gene-bcl6b/gene-ifi35/gene-LOC122869242/gene-LOC122878212/gene-metrnlb/gene-nupr1b	2
BP	GO:0043066	negative regulation of apoptotic process	8/646	103/11595	0.215257390350606	0.779836068085319	gene-LOC122878127/gene-LOC122877908/gene-ndnf/gene-LOC122877917/gene-snai2/gene-angptl4/gene-nupr1b/gene-LOC122868820	8	angptl4/LOC122868820/LOC122877908/LOC122877917/LOC122878127/ndnf/nupr1b/snai2	4	gene-LOC122877908/gene-LOC122877917/gene-LOC122878127/gene-nupr1b	4
BP	GO:0031668	cellular response to extracellular stimulus	3/646	29/11595	0.217573091919464	0.779836068085319	gene-snai2/gene-tnca/gene-LOC122865952	3	LOC122865952/snai2/tnca	0	-	3
BP	GO:0071496	cellular response to external stimulus	3/646	29/11595	0.217573091919464	0.779836068085319	gene-snai2/gene-tnca/gene-LOC122865952	3	LOC122865952/snai2/tnca	0	-	3
BP	GO:0099173	postsynapse organization	3/646	29/11595	0.217573091919464	0.779836068085319	gene-nptx1l/gene-cnksr1/gene-si:ch211-278a6.1	3	cnksr1/nptx1l/si:ch211-278a6.1	2	gene-nptx1l/gene-si:ch211-278a6.1	1
BP	GO:0032271	regulation of protein polymerization	8/646	104/11595	0.222765357469707	0.779836068085319	gene-tppp3/gene-LOC122885147/gene-LOC122879509/gene-tmod4/gene-fmn2a/gene-LOC122861414/gene-fmn1/gene-baiap2l1a	8	baiap2l1a/fmn1/fmn2a/LOC122861414/LOC122879509/LOC122885147/tmod4/tppp3	6	gene-baiap2l1a/gene-fmn1/gene-LOC122861414/gene-LOC122879509/gene-LOC122885147/gene-tmod4	2
BP	GO:0043069	negative regulation of programmed cell death	8/646	104/11595	0.222765357469707	0.779836068085319	gene-LOC122878127/gene-LOC122877908/gene-ndnf/gene-LOC122877917/gene-snai2/gene-angptl4/gene-nupr1b/gene-LOC122868820	8	angptl4/LOC122868820/LOC122877908/LOC122877917/LOC122878127/ndnf/nupr1b/snai2	4	gene-LOC122877908/gene-LOC122877917/gene-LOC122878127/gene-nupr1b	4
BP	GO:0010632	regulation of epithelial cell migration	2/646	16/11595	0.223069386917428	0.779836068085319	gene-LOC122877917/gene-snai2	2	LOC122877917/snai2	1	gene-LOC122877917	1
BP	GO:0010811	positive regulation of cell-substrate adhesion	2/646	16/11595	0.223069386917428	0.779836068085319	gene-LOC122874995/gene-ndnf	2	LOC122874995/ndnf	1	gene-LOC122874995	1
BP	GO:0018212	peptidyl-tyrosine modification	2/646	16/11595	0.223069386917428	0.779836068085319	gene-dok7b/gene-LOC122869123	2	dok7b/LOC122869123	1	gene-LOC122869123	1
BP	GO:0030216	keratinocyte differentiation	2/646	16/11595	0.223069386917428	0.779836068085319	gene-LOC122882909/gene-LOC122882907	2	LOC122882907/LOC122882909	2	gene-LOC122882907/gene-LOC122882909	0
BP	GO:0045666	positive regulation of neuron differentiation	2/646	16/11595	0.223069386917428	0.779836068085319	gene-brinp3a.2/gene-LOC122887176	2	brinp3a.2/LOC122887176	0	-	2
BP	GO:0048596	embryonic camera-type eye morphogenesis	2/646	16/11595	0.223069386917428	0.779836068085319	gene-znf703/gene-sox4b	2	sox4b/znf703	0	-	2
BP	GO:0050768	negative regulation of neurogenesis	2/646	16/11595	0.223069386917428	0.779836068085319	gene-znf296/gene-spartb	2	spartb/znf296	1	gene-spartb	1
BP	GO:0050920	regulation of chemotaxis	2/646	16/11595	0.223069386917428	0.779836068085319	gene-swap70a/gene-snai2	2	snai2/swap70a	0	-	2
BP	GO:0051963	regulation of synapse assembly	2/646	16/11595	0.223069386917428	0.779836068085319	gene-nptx1l/gene-LOC122878127	2	LOC122878127/nptx1l	2	gene-LOC122878127/gene-nptx1l	0
BP	GO:0061318	renal filtration cell differentiation	2/646	16/11595	0.223069386917428	0.779836068085319	gene-LOC122870658/gene-LOC122865952	2	LOC122865952/LOC122870658	1	gene-LOC122870658	1
BP	GO:0071219	cellular response to molecule of bacterial origin	2/646	16/11595	0.223069386917428	0.779836068085319	gene-cmpk2/gene-LOC122868820	2	cmpk2/LOC122868820	1	gene-cmpk2	1
BP	GO:0071222	cellular response to lipopolysaccharide	2/646	16/11595	0.223069386917428	0.779836068085319	gene-cmpk2/gene-LOC122868820	2	cmpk2/LOC122868820	1	gene-cmpk2	1
BP	GO:0072010	glomerular epithelium development	2/646	16/11595	0.223069386917428	0.779836068085319	gene-LOC122870658/gene-LOC122865952	2	LOC122865952/LOC122870658	1	gene-LOC122870658	1
BP	GO:0072112	glomerular visceral epithelial cell differentiation	2/646	16/11595	0.223069386917428	0.779836068085319	gene-LOC122870658/gene-LOC122865952	2	LOC122865952/LOC122870658	1	gene-LOC122870658	1
BP	GO:0072311	glomerular epithelial cell differentiation	2/646	16/11595	0.223069386917428	0.779836068085319	gene-LOC122870658/gene-LOC122865952	2	LOC122865952/LOC122870658	1	gene-LOC122870658	1
BP	GO:0097529	myeloid leukocyte migration	2/646	16/11595	0.223069386917428	0.779836068085319	gene-swap70a/gene-LOC122873767	2	LOC122873767/swap70a	1	gene-LOC122873767	1
BP	GO:1901654	response to ketone	2/646	16/11595	0.223069386917428	0.779836068085319	gene-LOC122877917/gene-tnca	2	LOC122877917/tnca	1	gene-LOC122877917	1
BP	GO:1905515	non-motile cilium assembly	2/646	16/11595	0.223069386917428	0.779836068085319	gene-cep126/gene-ccdc13	2	ccdc13/cep126	1	gene-ccdc13	1
BP	GO:2000027	regulation of animal organ morphogenesis	2/646	16/11595	0.223069386917428	0.779836068085319	gene-snai2/gene-sapcd1	2	sapcd1/snai2	1	gene-sapcd1	1
BP	GO:2000116	regulation of cysteine-type endopeptidase activity	2/646	16/11595	0.223069386917428	0.779836068085319	gene-LOC122877917/gene-LOC122881737	2	LOC122877917/LOC122881737	1	gene-LOC122877917	1
BP	GO:0030042	actin filament depolymerization	4/646	44/11595	0.228395745887617	0.791950906994829	gene-swap70a/gene-LOC122879509/gene-tmod4/gene-LOC122871423	4	LOC122871423/LOC122879509/swap70a/tmod4	3	gene-LOC122871423/gene-LOC122879509/gene-tmod4	1
BP	GO:0040013	negative regulation of locomotion	4/646	44/11595	0.228395745887617	0.791950906994829	gene-podn/gene-LOC122877917/gene-phldb2b/gene-tafa5a	4	LOC122877917/phldb2b/podn/tafa5a	2	gene-LOC122877917/gene-podn	2
BP	GO:0046434	organophosphate catabolic process	4/646	44/11595	0.228395745887617	0.791950906994829	gene-dut/gene-LOC122872164/gene-pde4ba/gene-smpdl3b	4	dut/LOC122872164/pde4ba/smpdl3b	1	gene-LOC122872164	3
BP	GO:0051302	regulation of cell division	4/646	44/11595	0.228395745887617	0.791950906994829	gene-mdkb/gene-LOC122888753/gene-tgfb3/gene-si:ch211-63p21.8	4	LOC122888753/mdkb/si:ch211-63p21.8/tgfb3	2	gene-LOC122888753/gene-si:ch211-63p21.8	2
BP	GO:0007219	Notch signaling pathway	6/646	74/11595	0.229709327645901	0.791950906994829	gene-LOC122888197/gene-LOC122873030/gene-angptl2b/gene-snai2/gene-id2a/gene-LOC122862003	6	angptl2b/id2a/LOC122862003/LOC122873030/LOC122888197/snai2	1	gene-LOC122888197	5
BP	GO:0001764	neuron migration	3/646	30/11595	0.232520469786272	0.791950906994829	gene-reln/gene-ndnf/gene-mrtfbb	3	mrtfbb/ndnf/reln	0	-	3
BP	GO:0007269	neurotransmitter secretion	3/646	30/11595	0.232520469786272	0.791950906994829	gene-syt12/gene-LOC122882364/gene-LOC122871213	3	LOC122871213/LOC122882364/syt12	2	gene-LOC122882364/gene-syt12	1
BP	GO:0010631	epithelial cell migration	3/646	30/11595	0.232520469786272	0.791950906994829	gene-vegfc/gene-LOC122877917/gene-snai2	3	LOC122877917/snai2/vegfc	1	gene-LOC122877917	2
BP	GO:0010927	cellular component assembly involved in morphogenesis	3/646	30/11595	0.232520469786272	0.791950906994829	gene-lrrc39/gene-tmod4/gene-phldb2b	3	lrrc39/phldb2b/tmod4	2	gene-lrrc39/gene-tmod4	1
BP	GO:0072527	pyrimidine-containing compound metabolic process	3/646	30/11595	0.232520469786272	0.791950906994829	gene-dut/gene-nme5/gene-cmpk2	3	cmpk2/dut/nme5	2	gene-cmpk2/gene-nme5	1
BP	GO:0090630	activation of GTPase activity	3/646	30/11595	0.232520469786272	0.791950906994829	gene-rundc1/gene-sgsm3/gene-tbc1d30	3	rundc1/sgsm3/tbc1d30	3	gene-rundc1/gene-sgsm3/gene-tbc1d30	0
BP	GO:0099643	signal release from synapse	3/646	30/11595	0.232520469786272	0.791950906994829	gene-syt12/gene-LOC122882364/gene-LOC122871213	3	LOC122871213/LOC122882364/syt12	2	gene-LOC122882364/gene-syt12	1
BP	GO:1902275	regulation of chromatin organization	3/646	30/11595	0.232520469786272	0.791950906994829	gene-znf703/gene-snai2/gene-gfi1aa	3	gfi1aa/snai2/znf703	1	gene-gfi1aa	2
BP	GO:0060562	epithelial tube morphogenesis	6/646	75/11595	0.238951794528297	0.799781610746716	gene-skib/gene-vegfc/gene-pard6gb/gene-tnca/gene-fzd2/gene-cacna1c	6	cacna1c/fzd2/pard6gb/skib/tnca/vegfc	0	-	6
BP	GO:0009063	cellular amino acid catabolic process	4/646	45/11595	0.240575532769534	0.799781610746716	gene-hal/gene-ddah1/gene-aldh5a1/gene-enosf1	4	aldh5a1/ddah1/enosf1/hal	3	gene-aldh5a1/gene-enosf1/gene-hal	1
BP	GO:0048588	developmental cell growth	4/646	45/11595	0.240575532769534	0.799781610746716	gene-omgb/gene-znf296/gene-spartb/gene-pard6gb	4	omgb/pard6gb/spartb/znf296	2	gene-omgb/gene-spartb	2
BP	GO:0043086	negative regulation of catalytic activity	5/646	60/11595	0.241330583282985	0.799781610746716	gene-ppp1r27b/gene-adgrv1/gene-LOC122877917/gene-zgc:162144/gene-zgc:92242	5	adgrv1/LOC122877917/ppp1r27b/zgc:162144/zgc:92242	5	gene-adgrv1/gene-LOC122877917/gene-ppp1r27b/gene-zgc:162144/gene-zgc:92242	0
BP	GO:0000381	regulation of alternative mRNA splicing, via spliceosome	2/646	17/11595	0.244100192352936	0.799781610746716	gene-LOC122872991/gene-srrm4	2	LOC122872991/srrm4	2	gene-LOC122872991/gene-srrm4	0
BP	GO:0009190	cyclic nucleotide biosynthetic process	2/646	17/11595	0.244100192352936	0.799781610746716	gene-LOC122882904/gene-LOC122869764	2	LOC122869764/LOC122882904	1	gene-LOC122869764	1
BP	GO:0021675	nerve development	2/646	17/11595	0.244100192352936	0.799781610746716	gene-sulf2a/gene-nptx1l	2	nptx1l/sulf2a	2	gene-nptx1l/gene-sulf2a	0
BP	GO:0031018	endocrine pancreas development	2/646	17/11595	0.244100192352936	0.799781610746716	gene-sox4b/gene-fzd2	2	fzd2/sox4b	0	-	2
BP	GO:0031532	actin cytoskeleton reorganization	2/646	17/11595	0.244100192352936	0.799781610746716	gene-LOC122872091/gene-parvb	2	LOC122872091/parvb	1	gene-parvb	1
BP	GO:0043534	blood vessel endothelial cell migration	2/646	17/11595	0.244100192352936	0.799781610746716	gene-vegfc/gene-LOC122877917	2	LOC122877917/vegfc	1	gene-LOC122877917	1
BP	GO:0048048	embryonic eye morphogenesis	2/646	17/11595	0.244100192352936	0.799781610746716	gene-znf703/gene-sox4b	2	sox4b/znf703	0	-	2
BP	GO:0052548	regulation of endopeptidase activity	2/646	17/11595	0.244100192352936	0.799781610746716	gene-LOC122877917/gene-LOC122881737	2	LOC122877917/LOC122881737	1	gene-LOC122877917	1
BP	GO:0072331	signal transduction by p53 class mediator	2/646	17/11595	0.244100192352936	0.799781610746716	gene-snai2/gene-nupr1b	2	nupr1b/snai2	1	gene-nupr1b	1
BP	GO:0110020	regulation of actomyosin structure organization	2/646	17/11595	0.244100192352936	0.799781610746716	gene-LOC122878127/gene-phldb2b	2	LOC122878127/phldb2b	1	gene-LOC122878127	1
BP	GO:2001242	regulation of intrinsic apoptotic signaling pathway	2/646	17/11595	0.244100192352936	0.799781610746716	gene-snai2/gene-nupr1b	2	nupr1b/snai2	1	gene-nupr1b	1
BP	GO:0009259	ribonucleotide metabolic process	12/646	171/11595	0.245047414553227	0.799781610746716	gene-ampd3a/gene-LOC122872164/gene-gpia/gene-gck/gene-pde4ba/gene-aldob/gene-nme5/gene-gapdhs/gene-LOC122882904/gene-acaca/gene-nupr1b/gene-LOC122869764	12	acaca/aldob/ampd3a/gapdhs/gck/gpia/LOC122869764/LOC122872164/LOC122882904/nme5/nupr1b/pde4ba	9	gene-acaca/gene-aldob/gene-gapdhs/gene-gck/gene-gpia/gene-LOC122869764/gene-LOC122872164/gene-nme5/gene-nupr1b	3
BP	GO:0007264	small GTPase mediated signal transduction	15/646	220/11595	0.245265539937521	0.799781610746716	gene-LOC122869858/gene-si:ch211-286b5.4/gene-rtkna/gene-bcar3/gene-rap1gap2a/gene-rgl2/gene-rasgrp3/gene-LOC122884943/gene-arfgef3/gene-zmp:0000001168/gene-LOC122865952/gene-LOC122865539/gene-LOC122869489/gene-LOC122869789/gene-iqsec3a	15	arfgef3/bcar3/iqsec3a/LOC122865539/LOC122865952/LOC122869489/LOC122869789/LOC122869858/LOC122884943/rap1gap2a/rasgrp3/rgl2/rtkna/si:ch211-286b5.4/zmp:0000001168	12	gene-arfgef3/gene-bcar3/gene-iqsec3a/gene-LOC122865539/gene-LOC122869789/gene-LOC122869858/gene-LOC122884943/gene-rap1gap2a/gene-rasgrp3/gene-rgl2/gene-si:ch211-286b5.4/gene-zmp:0000001168	3
BP	GO:0010876	lipid localization	10/646	139/11595	0.246824281033337	0.799781610746716	gene-atp8b4/gene-LOC122875390/gene-LOC122876099/gene-osbpl3b/gene-esyt1a/gene-LOC122883087/gene-LOC122865700/gene-osbp2a/gene-tex2/gene-LOC122871278	10	atp8b4/esyt1a/LOC122865700/LOC122871278/LOC122875390/LOC122876099/LOC122883087/osbp2a/osbpl3b/tex2	7	gene-atp8b4/gene-LOC122865700/gene-LOC122871278/gene-LOC122875390/gene-LOC122876099/gene-LOC122883087/gene-osbp2a	3
BP	GO:0061061	muscle structure development	10/646	139/11595	0.246824281033337	0.799781610746716	gene-lrrc39/gene-LOC122878127/gene-gpc4/gene-tmod4/gene-myofl/gene-tmem88a/gene-pdzph1/gene-boc/gene-nupr1b/gene-mrtfbb	10	boc/gpc4/LOC122878127/lrrc39/mrtfbb/myofl/nupr1b/pdzph1/tmem88a/tmod4	5	gene-LOC122878127/gene-lrrc39/gene-nupr1b/gene-pdzph1/gene-tmod4	5
BP	GO:0001837	epithelial to mesenchymal transition	3/646	31/11595	0.247645100234789	0.799781610746716	gene-snai1a/gene-snai2/gene-phldb2b	3	phldb2b/snai1a/snai2	0	-	3
BP	GO:0007052	mitotic spindle organization	3/646	31/11595	0.247645100234789	0.799781610746716	gene-LOC122877630/gene-cep126/gene-tacc2	3	cep126/LOC122877630/tacc2	2	gene-LOC122877630/gene-tacc2	1
BP	GO:0009798	axis specification	3/646	31/11595	0.247645100234789	0.799781610746716	gene-LOC122874938/gene-tdrd6/gene-caprin2	3	caprin2/LOC122874938/tdrd6	2	gene-caprin2/gene-tdrd6	1
BP	GO:0016358	dendrite development	3/646	31/11595	0.247645100234789	0.799781610746716	gene-znf296/gene-LOC122869123/gene-si:ch211-278a6.1	3	LOC122869123/si:ch211-278a6.1/znf296	2	gene-LOC122869123/gene-si:ch211-278a6.1	1
BP	GO:0048545	response to steroid hormone	3/646	31/11595	0.247645100234789	0.799781610746716	gene-LOC122878127/gene-paqr8/gene-LOC122865952	3	LOC122865952/LOC122878127/paqr8	2	gene-LOC122878127/gene-paqr8	1
BP	GO:0050803	regulation of synapse structure or activity	3/646	31/11595	0.247645100234789	0.799781610746716	gene-nptx1l/gene-LOC122878127/gene-si:ch211-278a6.1	3	LOC122878127/nptx1l/si:ch211-278a6.1	3	gene-LOC122878127/gene-nptx1l/gene-si:ch211-278a6.1	0
BP	GO:0050807	regulation of synapse organization	3/646	31/11595	0.247645100234789	0.799781610746716	gene-nptx1l/gene-LOC122878127/gene-si:ch211-278a6.1	3	LOC122878127/nptx1l/si:ch211-278a6.1	3	gene-LOC122878127/gene-nptx1l/gene-si:ch211-278a6.1	0
BP	GO:0060027	convergent extension involved in gastrulation	3/646	31/11595	0.247645100234789	0.799781610746716	gene-gpc4/gene-fzd2/gene-LOC122871826	3	fzd2/gpc4/LOC122871826	0	-	3
BP	GO:0051146	striated muscle cell differentiation	6/646	76/11595	0.248304290778341	0.799781610746716	gene-lrrc39/gene-gpc4/gene-tmod4/gene-myofl/gene-tmem88a/gene-pdzph1	6	gpc4/lrrc39/myofl/pdzph1/tmem88a/tmod4	3	gene-lrrc39/gene-pdzph1/gene-tmod4	3
BP	GO:0097485	neuron projection guidance	6/646	76/11595	0.248304290778341	0.799781610746716	gene-vegfc/gene-emb/gene-myot/gene-LOC122888546/gene-boc/gene-dpysl4	6	boc/dpysl4/emb/LOC122888546/myot/vegfc	3	gene-dpysl4/gene-emb/gene-myot	3
BP	GO:0019693	ribose phosphate metabolic process	12/646	172/11595	0.251202128282397	0.806096381801723	gene-ampd3a/gene-LOC122872164/gene-gpia/gene-gck/gene-pde4ba/gene-aldob/gene-nme5/gene-gapdhs/gene-LOC122882904/gene-acaca/gene-nupr1b/gene-LOC122869764	12	acaca/aldob/ampd3a/gapdhs/gck/gpia/LOC122869764/LOC122872164/LOC122882904/nme5/nupr1b/pde4ba	9	gene-acaca/gene-aldob/gene-gapdhs/gene-gck/gene-gpia/gene-LOC122869764/gene-LOC122872164/gene-nme5/gene-nupr1b	3
BP	GO:0051241	negative regulation of multicellular organismal process	12/646	172/11595	0.251202128282397	0.806096381801723	gene-tusc2a/gene-LOC122874938/gene-LOC122878127/gene-LOC122877917/gene-znf296/gene-spartb/gene-zbtb46/gene-snai2/gene-tmem88a/gene-LOC122869242/gene-lrrc17/gene-tafa5a	12	LOC122869242/LOC122874938/LOC122877917/LOC122878127/lrrc17/snai2/spartb/tafa5a/tmem88a/tusc2a/zbtb46/znf296	5	gene-LOC122869242/gene-LOC122877917/gene-LOC122878127/gene-spartb/gene-tusc2a	7
BP	GO:0080135	regulation of cellular response to stress	7/646	92/11595	0.251996786106906	0.80714054395508	gene-LOC122878127/gene-LOC122877917/gene-omgb/gene-snai2/gene-klhl43/gene-nupr1b/gene-cbx8a	7	cbx8a/klhl43/LOC122877917/LOC122878127/nupr1b/omgb/snai2	5	gene-klhl43/gene-LOC122877917/gene-LOC122878127/gene-nupr1b/gene-omgb	2
BP	GO:0048638	regulation of developmental growth	4/646	46/11595	0.252899940497544	0.807269630998175	gene-omgb/gene-znf296/gene-spartb/gene-pard6gb	4	omgb/pard6gb/spartb/znf296	2	gene-omgb/gene-spartb	2
BP	GO:0006915	apoptotic process	26/646	405/11595	0.252975773900009	0.807269630998175	gene-uacab/gene-ddit3/gene-nptx1l/gene-LOC122875409/gene-LOC122878127/gene-LOC122877908/gene-ndnf/gene-boka/gene-LOC122877917/gene-xaf1/gene-tnfaip8l2b/gene-LOC122881737/gene-si:ch211-112c15.8/gene-LOC122883012/gene-snai2/gene-angptl4/gene-ripk2/gene-irf1b/gene-LOC122861357/gene-LOC122865952/gene-trim69/gene-nupr1b/gene-LOC122868820/gene-zmp:0000000896/gene-pawr/gene-phlda1	26	angptl4/boka/ddit3/irf1b/LOC122861357/LOC122865952/LOC122868820/LOC122875409/LOC122877908/LOC122877917/LOC122878127/LOC122881737/LOC122883012/ndnf/nptx1l/nupr1b/pawr/phlda1/ripk2/si:ch211-112c15.8/snai2/tnfaip8l2b/trim69/uacab/xaf1/zmp:0000000896	14	gene-ddit3/gene-irf1b/gene-LOC122861357/gene-LOC122875409/gene-LOC122877908/gene-LOC122877917/gene-LOC122878127/gene-LOC122883012/gene-nptx1l/gene-nupr1b/gene-ripk2/gene-si:ch211-112c15.8/gene-trim69/gene-xaf1	12
BP	GO:0006914	autophagy	9/646	124/11595	0.254132541701046	0.807962979160441	gene-map1lc3c/gene-ctns/gene-wdfy4/gene-retreg1/gene-LOC122886528/gene-nupr1b/gene-LOC122869437/gene-dram1/gene-dcn	9	ctns/dcn/dram1/LOC122869437/LOC122886528/map1lc3c/nupr1b/retreg1/wdfy4	9	gene-ctns/gene-dcn/gene-dram1/gene-LOC122869437/gene-LOC122886528/gene-map1lc3c/gene-nupr1b/gene-retreg1/gene-wdfy4	0
BP	GO:0061919	process utilizing autophagic mechanism	9/646	124/11595	0.254132541701046	0.807962979160441	gene-map1lc3c/gene-ctns/gene-wdfy4/gene-retreg1/gene-LOC122886528/gene-nupr1b/gene-LOC122869437/gene-dram1/gene-dcn	9	ctns/dcn/dram1/LOC122869437/LOC122886528/map1lc3c/nupr1b/retreg1/wdfy4	9	gene-ctns/gene-dcn/gene-dram1/gene-LOC122869437/gene-LOC122886528/gene-map1lc3c/gene-nupr1b/gene-retreg1/gene-wdfy4	0
BP	GO:0010638	positive regulation of organelle organization	7/646	93/11595	0.26060519502819	0.819397156070629	gene-swap70a/gene-znf703/gene-fmn2a/gene-LOC122886528/gene-snai2/gene-LOC122861414/gene-fmn1	7	fmn1/fmn2a/LOC122861414/LOC122886528/snai2/swap70a/znf703	3	gene-fmn1/gene-LOC122861414/gene-LOC122886528	4
BP	GO:0032940	secretion by cell	10/646	141/11595	0.260637043232781	0.819397156070629	gene-LOC122876750/gene-syt12/gene-gck/gene-sytl4/gene-mroh1/gene-LOC122882364/gene-exoc3l2a/gene-si:dkey-196h17.9/gene-unc13d/gene-LOC122871213	10	exoc3l2a/gck/LOC122871213/LOC122876750/LOC122882364/mroh1/si:dkey-196h17.9/syt12/sytl4/unc13d	7	gene-gck/gene-LOC122876750/gene-LOC122882364/gene-mroh1/gene-si:dkey-196h17.9/gene-syt12/gene-unc13d	3
BP	GO:0035303	regulation of dephosphorylation	3/646	32/11595	0.262913825896401	0.819397156070629	gene-swap70a/gene-ppp1r27b/gene-zgc:92242	3	ppp1r27b/swap70a/zgc:92242	2	gene-ppp1r27b/gene-zgc:92242	1
BP	GO:0043484	regulation of RNA splicing	3/646	32/11595	0.262913825896401	0.819397156070629	gene-LOC122872991/gene-srrm4/gene-LOC122878127	3	LOC122872991/LOC122878127/srrm4	3	gene-LOC122872991/gene-LOC122878127/gene-srrm4	0
BP	GO:0051346	negative regulation of hydrolase activity	3/646	32/11595	0.262913825896401	0.819397156070629	gene-ppp1r27b/gene-LOC122877917/gene-zgc:92242	3	LOC122877917/ppp1r27b/zgc:92242	3	gene-LOC122877917/gene-ppp1r27b/gene-zgc:92242	0
BP	GO:0002088	lens development in camera-type eye	2/646	18/11595	0.265202520328091	0.819397156070629	gene-crybb1l1/gene-cryba2b	2	cryba2b/crybb1l1	2	gene-cryba2b/gene-crybb1l1	0
BP	GO:0002440	production of molecular mediator of immune response	2/646	18/11595	0.265202520328091	0.819397156070629	gene-swap70a/gene-LOC122868820	2	LOC122868820/swap70a	0	-	2
BP	GO:0006939	smooth muscle contraction	2/646	18/11595	0.265202520328091	0.819397156070629	gene-sulf2a/gene-LOC122863516	2	LOC122863516/sulf2a	1	gene-sulf2a	1
BP	GO:0009066	aspartate family amino acid metabolic process	2/646	18/11595	0.265202520328091	0.819397156070629	gene-LOC122876938/gene-asns	2	asns/LOC122876938	2	gene-asns/gene-LOC122876938	0
BP	GO:0010923	negative regulation of phosphatase activity	2/646	18/11595	0.265202520328091	0.819397156070629	gene-ppp1r27b/gene-zgc:92242	2	ppp1r27b/zgc:92242	2	gene-ppp1r27b/gene-zgc:92242	0
BP	GO:0010977	negative regulation of neuron projection development	2/646	18/11595	0.265202520328091	0.819397156070629	gene-znf296/gene-spartb	2	spartb/znf296	1	gene-spartb	1
BP	GO:0030903	notochord development	2/646	18/11595	0.265202520328091	0.819397156070629	gene-gpc4/gene-rab32a	2	gpc4/rab32a	1	gene-rab32a	1
BP	GO:0033334	fin morphogenesis	2/646	18/11595	0.265202520328091	0.819397156070629	gene-sp8a/gene-itga3b	2	itga3b/sp8a	1	gene-itga3b	1
BP	GO:0051961	negative regulation of nervous system development	2/646	18/11595	0.265202520328091	0.819397156070629	gene-znf296/gene-spartb	2	spartb/znf296	1	gene-spartb	1
BP	GO:0052547	regulation of peptidase activity	2/646	18/11595	0.265202520328091	0.819397156070629	gene-LOC122877917/gene-LOC122881737	2	LOC122877917/LOC122881737	1	gene-LOC122877917	1
BP	GO:0042742	defense response to bacterium	4/646	47/11595	0.265351288332175	0.819397156070629	gene-tusc2a/gene-LOC122881737/gene-LOC122881776/gene-dram1	4	dram1/LOC122881737/LOC122881776/tusc2a	3	gene-dram1/gene-LOC122881776/gene-tusc2a	1
BP	GO:0045934	negative regulation of nucleobase-containing compound metabolic process	14/646	208/11595	0.270305632743663	0.833200158277959	gene-znf703/gene-LOC122877917/gene-znf296/gene-zgc:162144/gene-id4/gene-snai2/gene-id2a/gene-jazf1a/gene-LOC122865952/gene-nupr1b/gene-cbx4/gene-cbx8a/gene-zfta/gene-bcl6b	14	bcl6b/cbx4/cbx8a/id2a/id4/jazf1a/LOC122865952/LOC122877917/nupr1b/snai2/zfta/zgc:162144/znf296/znf703	4	gene-bcl6b/gene-LOC122877917/gene-nupr1b/gene-zgc:162144	10
BP	GO:0008284	positive regulation of cell population proliferation	5/646	63/11595	0.273396334598927	0.841219491073623	gene-vegfc/gene-fgfr3/gene-tnca/gene-cbx8a/gene-sapcd1	5	cbx8a/fgfr3/sapcd1/tnca/vegfc	1	gene-sapcd1	4
BP	GO:0140352	export from cell	10/646	143/11595	0.274695935313689	0.843708944177758	gene-LOC122876750/gene-syt12/gene-gck/gene-sytl4/gene-mroh1/gene-LOC122882364/gene-exoc3l2a/gene-si:dkey-196h17.9/gene-unc13d/gene-LOC122871213	10	exoc3l2a/gck/LOC122871213/LOC122876750/LOC122882364/mroh1/si:dkey-196h17.9/syt12/sytl4/unc13d	7	gene-gck/gene-LOC122876750/gene-LOC122882364/gene-mroh1/gene-si:dkey-196h17.9/gene-syt12/gene-unc13d	3
BP	GO:0050804	modulation of chemical synaptic transmission	4/646	48/11595	0.27791217407345	0.845701489488994	gene-nptx1l/gene-syt12/gene-nlgn1/gene-LOC122881246	4	LOC122881246/nlgn1/nptx1l/syt12	3	gene-nlgn1/gene-nptx1l/gene-syt12	1
BP	GO:0099177	regulation of trans-synaptic signaling	4/646	48/11595	0.27791217407345	0.845701489488994	gene-nptx1l/gene-syt12/gene-nlgn1/gene-LOC122881246	4	LOC122881246/nlgn1/nptx1l/syt12	3	gene-nlgn1/gene-nptx1l/gene-syt12	1
BP	GO:0001947	heart looping	3/646	33/11595	0.278294792471378	0.845701489488994	gene-skib/gene-fzd2/gene-cacna1c	3	cacna1c/fzd2/skib	0	-	3
BP	GO:0030203	glycosaminoglycan metabolic process	3/646	33/11595	0.278294792471378	0.845701489488994	gene-ndnf/gene-has1/gene-gnsb	3	gnsb/has1/ndnf	1	gene-gnsb	2
BP	GO:0072073	kidney epithelium development	3/646	33/11595	0.278294792471378	0.845701489488994	gene-LOC122870658/gene-LOC122888062/gene-LOC122865952	3	LOC122865952/LOC122870658/LOC122888062	2	gene-LOC122870658/gene-LOC122888062	1
BP	GO:0090132	epithelium migration	3/646	33/11595	0.278294792471378	0.845701489488994	gene-vegfc/gene-LOC122877917/gene-snai2	3	LOC122877917/snai2/vegfc	1	gene-LOC122877917	2
BP	GO:0032879	regulation of localization	29/646	463/11595	0.281442637619055	0.853758971260624	gene-swap70a/gene-LOC122884571/gene-cttnbp2nla/gene-si:ch211-286b5.4/gene-syt12/gene-wdr54/gene-gck/gene-LOC122877630/gene-LOC122878127/gene-podn/gene-LOC122877917/gene-gpc4/gene-LOC122881975/gene-LOC122881976/gene-scn1laa/gene-snai2/gene-LOC122886797/gene-kcnj15/gene-kcnh5b/gene-LOC122864783/gene-kcng2/gene-phldb2b/gene-kcnj2a/gene-cacna1g/gene-si:ch211-278a6.1/gene-cacna1c/gene-LOC122871413/gen…	29	cacna1c/cacna1g/cttnbp2nla/gck/gpc4/kcng2/kcnh5b/kcnj15/kcnj2a/LOC122864783/LOC122871413/LOC122877630/LOC122877917/LOC122878127/LOC122881975/LOC122881976/LOC122884571/LOC122886797/phldb2b/podn/sapcd1/scn1laa/si:ch211-278a6.1/si:ch211-286b5.4/snai2/swap70a/syt12/tafa5a/wdr54	18	gene-gck/gene-kcng2/gene-kcnh5b/gene-kcnj2a/gene-LOC122871413/gene-LOC122877630/gene-LOC122877917/gene-LOC122878127/gene-LOC122881975/gene-LOC122881976/gene-LOC122884571/gene-LOC122886797/gene-podn/gene-sapcd1/gene-scn1laa/gene-si:ch211-278a6.1/gene-si:ch211-286b5.4/gene-syt12	11
BP	GO:1901617	organic hydroxy compound biosynthetic process	5/646	64/11595	0.284281891566499	0.856420126511933	gene-itpkcb/gene-ddc/gene-snai2/gene-LOC122888177/gene-LOC122871599	5	ddc/itpkcb/LOC122871599/LOC122888177/snai2	2	gene-ddc/gene-LOC122871599	3
BP	GO:0000380	alternative mRNA splicing, via spliceosome	2/646	19/11595	0.286303239967652	0.856420126511933	gene-LOC122872991/gene-srrm4	2	LOC122872991/srrm4	2	gene-LOC122872991/gene-srrm4	0
BP	GO:0010721	negative regulation of cell development	2/646	19/11595	0.286303239967652	0.856420126511933	gene-znf296/gene-spartb	2	spartb/znf296	1	gene-spartb	1
BP	GO:0030038	contractile actin filament bundle assembly	2/646	19/11595	0.286303239967652	0.856420126511933	gene-LOC122878127/gene-phldb2b	2	LOC122878127/phldb2b	1	gene-LOC122878127	1
BP	GO:0030183	B cell differentiation	2/646	19/11595	0.286303239967652	0.856420126511933	gene-LOC122878127/gene-znf296	2	LOC122878127/znf296	1	gene-LOC122878127	1
BP	GO:0030282	bone mineralization	2/646	19/11595	0.286303239967652	0.856420126511933	gene-pth4/gene-pthlha	2	pth4/pthlha	1	gene-pth4	1
BP	GO:0043149	stress fiber assembly	2/646	19/11595	0.286303239967652	0.856420126511933	gene-LOC122878127/gene-phldb2b	2	LOC122878127/phldb2b	1	gene-LOC122878127	1
BP	GO:1903510	mucopolysaccharide metabolic process	2/646	19/11595	0.286303239967652	0.856420126511933	gene-ndnf/gene-has1	2	has1/ndnf	0	-	2
BP	GO:0030833	regulation of actin filament polymerization	7/646	96/11595	0.286902384241085	0.856722397386574	gene-LOC122885147/gene-LOC122879509/gene-tmod4/gene-fmn2a/gene-LOC122861414/gene-fmn1/gene-baiap2l1a	7	baiap2l1a/fmn1/fmn2a/LOC122861414/LOC122879509/LOC122885147/tmod4	6	gene-baiap2l1a/gene-fmn1/gene-LOC122861414/gene-LOC122879509/gene-LOC122885147/gene-tmod4	1
BP	GO:0031032	actomyosin structure organization	4/646	49/11595	0.290565523250077	0.866157192357248	gene-lrrc39/gene-LOC122878127/gene-tmod4/gene-phldb2b	4	LOC122878127/lrrc39/phldb2b/tmod4	3	gene-LOC122878127/gene-lrrc39/gene-tmod4	1
BP	GO:0099536	synaptic signaling	9/646	129/11595	0.291741496036851	0.867780370432849	gene-LOC122876750/gene-nptx1l/gene-syt12/gene-nlgn1/gene-LOC122881246/gene-sv2a/gene-LOC122882364/gene-LOC122869123/gene-LOC122871213	9	LOC122869123/LOC122871213/LOC122876750/LOC122881246/LOC122882364/nlgn1/nptx1l/sv2a/syt12	7	gene-LOC122869123/gene-LOC122876750/gene-LOC122882364/gene-nlgn1/gene-nptx1l/gene-sv2a/gene-syt12	2
BP	GO:0006022	aminoglycan metabolic process	3/646	34/11595	0.293757508328836	0.867780370432849	gene-ndnf/gene-has1/gene-gnsb	3	gnsb/has1/ndnf	1	gene-gnsb	2
BP	GO:0033500	carbohydrate homeostasis	3/646	34/11595	0.293757508328836	0.867780370432849	gene-nptx1l/gene-gck/gene-LOC122878127	3	gck/LOC122878127/nptx1l	3	gene-gck/gene-LOC122878127/gene-nptx1l	0
BP	GO:0042593	glucose homeostasis	3/646	34/11595	0.293757508328836	0.867780370432849	gene-nptx1l/gene-gck/gene-LOC122878127	3	gck/LOC122878127/nptx1l	3	gene-gck/gene-LOC122878127/gene-nptx1l	0
BP	GO:0009967	positive regulation of signal transduction	12/646	179/11595	0.295726829879825	0.867780370432849	gene-tespa1/gene-sulf2a/gene-angptl2b/gene-LOC122878127/gene-tmem198a/gene-sp8a/gene-bambia/gene-dok6/gene-nupr1b/gene-ifi35/gene-LOC122871413/gene-caprin2	12	angptl2b/bambia/caprin2/dok6/ifi35/LOC122871413/LOC122878127/nupr1b/sp8a/sulf2a/tespa1/tmem198a	8	gene-caprin2/gene-dok6/gene-ifi35/gene-LOC122871413/gene-LOC122878127/gene-nupr1b/gene-sulf2a/gene-tmem198a	4
BP	GO:0012501	programmed cell death	26/646	416/11595	0.298788881616906	0.867780370432849	gene-uacab/gene-ddit3/gene-nptx1l/gene-LOC122875409/gene-LOC122878127/gene-LOC122877908/gene-ndnf/gene-boka/gene-LOC122877917/gene-xaf1/gene-tnfaip8l2b/gene-LOC122881737/gene-si:ch211-112c15.8/gene-LOC122883012/gene-snai2/gene-angptl4/gene-ripk2/gene-irf1b/gene-LOC122861357/gene-LOC122865952/gene-trim69/gene-nupr1b/gene-LOC122868820/gene-zmp:0000000896/gene-pawr/gene-phlda1	26	angptl4/boka/ddit3/irf1b/LOC122861357/LOC122865952/LOC122868820/LOC122875409/LOC122877908/LOC122877917/LOC122878127/LOC122881737/LOC122883012/ndnf/nptx1l/nupr1b/pawr/phlda1/ripk2/si:ch211-112c15.8/snai2/tnfaip8l2b/trim69/uacab/xaf1/zmp:0000000896	14	gene-ddit3/gene-irf1b/gene-LOC122861357/gene-LOC122875409/gene-LOC122877908/gene-LOC122877917/gene-LOC122878127/gene-LOC122883012/gene-nptx1l/gene-nupr1b/gene-ripk2/gene-si:ch211-112c15.8/gene-trim69/gene-xaf1	12
BP	GO:0044087	regulation of cellular component biogenesis	17/646	264/11595	0.303120609949901	0.867780370432849	gene-tppp3/gene-swap70a/gene-pmepa1/gene-LOC122885147/gene-nptx1l/gene-vdac3/gene-LOC122878127/gene-LOC122879509/gene-tmod4/gene-fmn2a/gene-snai2/gene-LOC122861414/gene-fmn1/gene-phldb2b/gene-baiap2l1a/gene-nupr1b/gene-LOC122869242	17	baiap2l1a/fmn1/fmn2a/LOC122861414/LOC122869242/LOC122878127/LOC122879509/LOC122885147/nptx1l/nupr1b/phldb2b/pmepa1/snai2/swap70a/tmod4/tppp3/vdac3	11	gene-baiap2l1a/gene-fmn1/gene-LOC122861414/gene-LOC122869242/gene-LOC122878127/gene-LOC122879509/gene-LOC122885147/gene-nptx1l/gene-nupr1b/gene-tmod4/gene-vdac3	6
BP	GO:0001819	positive regulation of cytokine production	4/646	50/11595	0.303294632995736	0.867780370432849	gene-tusc2a/gene-tlr3/gene-LOC122878127/gene-LOC122872132	4	LOC122872132/LOC122878127/tlr3/tusc2a	2	gene-LOC122878127/gene-tusc2a	2
BP	GO:0009953	dorsal/ventral pattern formation	4/646	50/11595	0.303294632995736	0.867780370432849	gene-skib/gene-snai1a/gene-LOC122874938/gene-caprin2	4	caprin2/LOC122874938/skib/snai1a	1	gene-caprin2	3
BP	GO:1990778	protein localization to cell periphery	4/646	50/11595	0.303294632995736	0.867780370432849	gene-nptx1l/gene-LOC122877630/gene-LOC122878127/gene-sapcd1	4	LOC122877630/LOC122878127/nptx1l/sapcd1	4	gene-LOC122877630/gene-LOC122878127/gene-nptx1l/gene-sapcd1	0
BP	GO:0031324	negative regulation of cellular metabolic process	22/646	349/11595	0.304254782686236	0.867780370432849	gene-swap70a/gene-ppp1r27b/gene-znf703/gene-wdr54/gene-LOC122878127/gene-LOC122877917/gene-znf296/gene-zgc:162144/gene-zgc:92242/gene-id4/gene-snai2/gene-LOC122886518/gene-id2a/gene-klhl43/gene-jazf1a/gene-LOC122865952/gene-nupr1b/gene-cbx4/gene-cbx8a/gene-zfta/gene-bcl6b/gene-caprin2	22	bcl6b/caprin2/cbx4/cbx8a/id2a/id4/jazf1a/klhl43/LOC122865952/LOC122877917/LOC122878127/LOC122886518/nupr1b/ppp1r27b/snai2/swap70a/wdr54/zfta/zgc:162144/zgc:92242/znf296/znf703	10	gene-bcl6b/gene-caprin2/gene-klhl43/gene-LOC122877917/gene-LOC122878127/gene-LOC122886518/gene-nupr1b/gene-ppp1r27b/gene-zgc:162144/gene-zgc:92242	12
BP	GO:0000122	negative regulation of transcription by RNA polymerase II	7/646	98/11595	0.304770048056445	0.867780370432849	gene-LOC122877917/gene-znf296/gene-snai2/gene-jazf1a/gene-LOC122865952/gene-cbx8a/gene-bcl6b	7	bcl6b/cbx8a/jazf1a/LOC122865952/LOC122877917/snai2/znf296	2	gene-bcl6b/gene-LOC122877917	5
BP	GO:0014065	phosphatidylinositol 3-kinase signaling	5/646	66/11595	0.306282948872922	0.867780370432849	gene-LOC122878127/gene-LOC122877917/gene-LOC122884209/gene-LOC122869242/gene-LOC122871413	5	LOC122869242/LOC122871413/LOC122877917/LOC122878127/LOC122884209	4	gene-LOC122869242/gene-LOC122871413/gene-LOC122877917/gene-LOC122878127	1
BP	GO:0009117	nucleotide metabolic process	15/646	231/11595	0.307064031062111	0.867780370432849	gene-dut/gene-ampd3a/gene-LOC122872164/gene-gpia/gene-gck/gene-pde4ba/gene-zgc:162144/gene-aldob/gene-nme5/gene-gapdhs/gene-LOC122882904/gene-acaca/gene-cmpk2/gene-nupr1b/gene-LOC122869764	15	acaca/aldob/ampd3a/cmpk2/dut/gapdhs/gck/gpia/LOC122869764/LOC122872164/LOC122882904/nme5/nupr1b/pde4ba/zgc:162144	11	gene-acaca/gene-aldob/gene-cmpk2/gene-gapdhs/gene-gck/gene-gpia/gene-LOC122869764/gene-LOC122872164/gene-nme5/gene-nupr1b/gene-zgc:162144	4
BP	GO:0045321	leukocyte activation	9/646	131/11595	0.307178496634857	0.867780370432849	gene-swap70a/gene-tusc2a/gene-LOC122873767/gene-LOC122878127/gene-znf296/gene-wdfy4/gene-ndrg1a/gene-ifi35/gene-LOC122869242	9	ifi35/LOC122869242/LOC122873767/LOC122878127/ndrg1a/swap70a/tusc2a/wdfy4/znf296	7	gene-ifi35/gene-LOC122869242/gene-LOC122873767/gene-LOC122878127/gene-ndrg1a/gene-tusc2a/gene-wdfy4	2
BP	GO:0006879	cellular iron ion homeostasis	2/646	20/11595	0.307337123648899	0.867780370432849	gene-LOC122881776/gene-LOC122868396	2	LOC122868396/LOC122881776	2	gene-LOC122868396/gene-LOC122881776	0
BP	GO:0006909	phagocytosis	2/646	20/11595	0.307337123648899	0.867780370432849	gene-tusc2a/gene-itgb2	2	itgb2/tusc2a	2	gene-itgb2/gene-tusc2a	0
BP	GO:0019882	antigen processing and presentation	2/646	20/11595	0.307337123648899	0.867780370432849	gene-wdfy4/gene-b2m	2	b2m/wdfy4	2	gene-b2m/gene-wdfy4	0
BP	GO:0021782	glial cell development	2/646	20/11595	0.307337123648899	0.867780370432849	gene-omgb/gene-ndrg1a	2	ndrg1a/omgb	2	gene-ndrg1a/gene-omgb	0
BP	GO:0030308	negative regulation of cell growth	2/646	20/11595	0.307337123648899	0.867780370432849	gene-znf296/gene-spartb	2	spartb/znf296	1	gene-spartb	1
BP	GO:0030595	leukocyte chemotaxis	2/646	20/11595	0.307337123648899	0.867780370432849	gene-swap70a/gene-LOC122873767	2	LOC122873767/swap70a	1	gene-LOC122873767	1
BP	GO:0031076	embryonic camera-type eye development	2/646	20/11595	0.307337123648899	0.867780370432849	gene-znf703/gene-sox4b	2	sox4b/znf703	0	-	2
BP	GO:0031101	fin regeneration	2/646	20/11595	0.307337123648899	0.867780370432849	gene-ccn1/gene-kdm6bb	2	ccn1/kdm6bb	0	-	2
BP	GO:0032963	collagen metabolic process	2/646	20/11595	0.307337123648899	0.867780370432849	gene-mmp9/gene-cbx8a	2	cbx8a/mmp9	1	gene-mmp9	1
BP	GO:0042552	myelination	2/646	20/11595	0.307337123648899	0.867780370432849	gene-omgb/gene-ndrg1a	2	ndrg1a/omgb	2	gene-ndrg1a/gene-omgb	0
BP	GO:0043523	regulation of neuron apoptotic process	2/646	20/11595	0.307337123648899	0.867780370432849	gene-ndnf/gene-nupr1b	2	ndnf/nupr1b	1	gene-nupr1b	1
BP	GO:0048024	regulation of mRNA splicing, via spliceosome	2/646	20/11595	0.307337123648899	0.867780370432849	gene-LOC122872991/gene-srrm4	2	LOC122872991/srrm4	2	gene-LOC122872991/gene-srrm4	0
BP	GO:0048813	dendrite morphogenesis	2/646	20/11595	0.307337123648899	0.867780370432849	gene-LOC122869123/gene-si:ch211-278a6.1	2	LOC122869123/si:ch211-278a6.1	2	gene-LOC122869123/gene-si:ch211-278a6.1	0
BP	GO:0051402	neuron apoptotic process	2/646	20/11595	0.307337123648899	0.867780370432849	gene-ndnf/gene-nupr1b	2	ndnf/nupr1b	1	gene-nupr1b	1
BP	GO:0060216	definitive hemopoiesis	2/646	20/11595	0.307337123648899	0.867780370432849	gene-cebpa/gene-angptl2b	2	angptl2b/cebpa	1	gene-cebpa	1
BP	GO:0090090	negative regulation of canonical Wnt signaling pathway	2/646	20/11595	0.307337123648899	0.867780370432849	gene-snai2/gene-tmem88a	2	snai2/tmem88a	0	-	2
BP	GO:1902806	regulation of cell cycle G1/S phase transition	2/646	20/11595	0.307337123648899	0.867780370432849	gene-LOC122877917/gene-LOC122865952	2	LOC122865952/LOC122877917	1	gene-LOC122877917	1
BP	GO:0007224	smoothened signaling pathway	3/646	35/11595	0.309272887834498	0.867780370432849	gene-sox4b/gene-cfap410/gene-boc	3	boc/cfap410/sox4b	0	-	3
BP	GO:0009141	nucleoside triphosphate metabolic process	3/646	35/11595	0.309272887834498	0.867780370432849	gene-dut/gene-nme5/gene-cmpk2	3	cmpk2/dut/nme5	2	gene-cmpk2/gene-nme5	1
BP	GO:0072006	nephron development	3/646	35/11595	0.309272887834498	0.867780370432849	gene-LOC122870658/gene-LOC122888062/gene-LOC122865952	3	LOC122865952/LOC122870658/LOC122888062	2	gene-LOC122870658/gene-LOC122888062	1
BP	GO:0090130	tissue migration	3/646	35/11595	0.309272887834498	0.867780370432849	gene-vegfc/gene-LOC122877917/gene-snai2	3	LOC122877917/snai2/vegfc	1	gene-LOC122877917	2
BP	GO:0060548	negative regulation of cell death	8/646	115/11595	0.310677750441133	0.870302493092424	gene-LOC122878127/gene-LOC122877908/gene-ndnf/gene-LOC122877917/gene-snai2/gene-angptl4/gene-nupr1b/gene-LOC122868820	8	angptl4/LOC122868820/LOC122877908/LOC122877917/LOC122878127/ndnf/nupr1b/snai2	4	gene-LOC122877908/gene-LOC122877917/gene-LOC122878127/gene-nupr1b	4
BP	GO:0010639	negative regulation of organelle organization	7/646	99/11595	0.313787583323701	0.876160135254491	gene-swap70a/gene-LOC122885147/gene-LOC122878127/gene-LOC122879509/gene-tmod4/gene-phldb2b/gene-nupr1b	7	LOC122878127/LOC122879509/LOC122885147/nupr1b/phldb2b/swap70a/tmod4	5	gene-LOC122878127/gene-LOC122879509/gene-LOC122885147/gene-nupr1b/gene-tmod4	2
BP	GO:0044089	positive regulation of cellular component biogenesis	7/646	99/11595	0.313787583323701	0.876160135254491	gene-tppp3/gene-swap70a/gene-LOC122878127/gene-fmn2a/gene-LOC122861414/gene-fmn1/gene-phldb2b	7	fmn1/fmn2a/LOC122861414/LOC122878127/phldb2b/swap70a/tppp3	3	gene-fmn1/gene-LOC122861414/gene-LOC122878127	4
BP	GO:0008219	cell death	27/646	437/11595	0.315390336902692	0.879208070458072	gene-uacab/gene-ddit3/gene-nptx1l/gene-LOC122875409/gene-LOC122878127/gene-LOC122877908/gene-ndnf/gene-boka/gene-LOC122877917/gene-xaf1/gene-tnfaip8l2b/gene-LOC122881737/gene-si:ch211-112c15.8/gene-LOC122883012/gene-snai2/gene-angptl4/gene-ripk2/gene-irf1b/gene-LOC122861357/gene-LOC122865952/gene-trim69/gene-dpysl4/gene-nupr1b/gene-LOC122868820/gene-zmp:0000000896/gene-pawr/gene-phlda1	27	angptl4/boka/ddit3/dpysl4/irf1b/LOC122861357/LOC122865952/LOC122868820/LOC122875409/LOC122877908/LOC122877917/LOC122878127/LOC122881737/LOC122883012/ndnf/nptx1l/nupr1b/pawr/phlda1/ripk2/si:ch211-112c15.8/snai2/tnfaip8l2b/trim69/uacab/xaf1/zmp:0000000896	15	gene-ddit3/gene-dpysl4/gene-irf1b/gene-LOC122861357/gene-LOC122875409/gene-LOC122877908/gene-LOC122877917/gene-LOC122878127/gene-LOC122883012/gene-nptx1l/gene-nupr1b/gene-ripk2/gene-si:ch211-112c15.8/gene-trim69/gene-xaf1	12
BP	GO:0051056	regulation of small GTPase mediated signal transduction	6/646	83/11595	0.316209768434864	0.879835930250304	gene-si:ch211-286b5.4/gene-rap1gap2a/gene-arfgef3/gene-zmp:0000001168/gene-LOC122865952/gene-iqsec3a	6	arfgef3/iqsec3a/LOC122865952/rap1gap2a/si:ch211-286b5.4/zmp:0000001168	5	gene-arfgef3/gene-iqsec3a/gene-rap1gap2a/gene-si:ch211-286b5.4/gene-zmp:0000001168	1
BP	GO:0009790	embryo development	25/646	404/11595	0.321279790083807	0.879835930250304	gene-cebpa/gene-skib/gene-sulf2a/gene-snai1a/gene-trim2a/gene-znf703/gene-amotl2a/gene-LOC122877917/gene-gpc4/gene-sox4b/gene-tmem88a/gene-kdm6bb/gene-LOC122888062/gene-tdrd6/gene-rab32a/gene-pard6gb/gene-sp8a/gene-phldb2b/gene-LOC122869123/gene-rundc1/gene-fzd2/gene-mrtfbb/gene-pthlha/gene-cacna1c/gene-LOC122871826	25	amotl2a/cacna1c/cebpa/fzd2/gpc4/kdm6bb/LOC122869123/LOC122871826/LOC122877917/LOC122888062/mrtfbb/pard6gb/phldb2b/pthlha/rab32a/rundc1/skib/snai1a/sox4b/sp8a/sulf2a/tdrd6/tmem88a/trim2a/znf703	8	gene-cebpa/gene-LOC122869123/gene-LOC122877917/gene-LOC122888062/gene-rab32a/gene-rundc1/gene-sulf2a/gene-tdrd6	17
BP	GO:0006753	nucleoside phosphate metabolic process	15/646	234/11595	0.324658123895709	0.879835930250304	gene-dut/gene-ampd3a/gene-LOC122872164/gene-gpia/gene-gck/gene-pde4ba/gene-zgc:162144/gene-aldob/gene-nme5/gene-gapdhs/gene-LOC122882904/gene-acaca/gene-cmpk2/gene-nupr1b/gene-LOC122869764	15	acaca/aldob/ampd3a/cmpk2/dut/gapdhs/gck/gpia/LOC122869764/LOC122872164/LOC122882904/nme5/nupr1b/pde4ba/zgc:162144	11	gene-acaca/gene-aldob/gene-cmpk2/gene-gapdhs/gene-gck/gene-gpia/gene-LOC122869764/gene-LOC122872164/gene-nme5/gene-nupr1b/gene-zgc:162144	4
BP	GO:0003143	embryonic heart tube morphogenesis	3/646	36/11595	0.324813280337948	0.879835930250304	gene-skib/gene-fzd2/gene-cacna1c	3	cacna1c/fzd2/skib	0	-	3
BP	GO:0007623	circadian rhythm	3/646	36/11595	0.324813280337948	0.879835930250304	gene-LOC122875367/gene-otx5/gene-camk1gb	3	camk1gb/LOC122875367/otx5	2	gene-camk1gb/gene-otx5	1
BP	GO:0030835	negative regulation of actin filament depolymerization	3/646	36/11595	0.324813280337948	0.879835930250304	gene-swap70a/gene-LOC122879509/gene-tmod4	3	LOC122879509/swap70a/tmod4	2	gene-LOC122879509/gene-tmod4	1
BP	GO:0042246	tissue regeneration	3/646	36/11595	0.324813280337948	0.879835930250304	gene-ccn1/gene-kdm6bb/gene-fzd2	3	ccn1/fzd2/kdm6bb	0	-	3
BP	GO:0062012	regulation of small molecule metabolic process	3/646	36/11595	0.324813280337948	0.879835930250304	gene-zgc:162144/gene-snai2/gene-nupr1b	3	nupr1b/snai2/zgc:162144	2	gene-nupr1b/gene-zgc:162144	1
BP	GO:1902105	regulation of leukocyte differentiation	3/646	36/11595	0.324813280337948	0.879835930250304	gene-LOC122878127/gene-zbtb46/gene-lrrc17	3	LOC122878127/lrrc17/zbtb46	1	gene-LOC122878127	2
BP	GO:0048015	phosphatidylinositol-mediated signaling	6/646	84/11595	0.326167177580588	0.879835930250304	gene-LOC122878127/gene-LOC122877917/gene-LOC122884209/gene-LOC122869242/gene-LOC122870088/gene-LOC122871413	6	LOC122869242/LOC122870088/LOC122871413/LOC122877917/LOC122878127/LOC122884209	4	gene-LOC122869242/gene-LOC122871413/gene-LOC122877917/gene-LOC122878127	2
BP	GO:0001666	response to hypoxia	2/646	21/11595	0.32824619560704	0.879835930250304	gene-ddit3/gene-eif2ak3	2	ddit3/eif2ak3	2	gene-ddit3/gene-eif2ak3	0
BP	GO:0002366	leukocyte activation involved in immune response	2/646	21/11595	0.32824619560704	0.879835930250304	gene-swap70a/gene-ifi35	2	ifi35/swap70a	1	gene-ifi35	1
BP	GO:0007272	ensheathment of neurons	2/646	21/11595	0.32824619560704	0.879835930250304	gene-omgb/gene-ndrg1a	2	ndrg1a/omgb	2	gene-ndrg1a/gene-omgb	0
BP	GO:0008366	axon ensheathment	2/646	21/11595	0.32824619560704	0.879835930250304	gene-omgb/gene-ndrg1a	2	ndrg1a/omgb	2	gene-ndrg1a/gene-omgb	0
BP	GO:0016525	negative regulation of angiogenesis	2/646	21/11595	0.32824619560704	0.879835930250304	gene-LOC122877917/gene-tafa5a	2	LOC122877917/tafa5a	1	gene-LOC122877917	1
BP	GO:0031345	negative regulation of cell projection organization	2/646	21/11595	0.32824619560704	0.879835930250304	gene-znf296/gene-spartb	2	spartb/znf296	1	gene-spartb	1
BP	GO:0035272	exocrine system development	2/646	21/11595	0.32824619560704	0.879835930250304	gene-lnx2b/gene-snai2	2	lnx2b/snai2	0	-	2
BP	GO:0035850	epithelial cell differentiation involved in kidney development	2/646	21/11595	0.32824619560704	0.879835930250304	gene-LOC122870658/gene-LOC122865952	2	LOC122865952/LOC122870658	1	gene-LOC122870658	1
BP	GO:0036293	response to decreased oxygen levels	2/646	21/11595	0.32824619560704	0.879835930250304	gene-ddit3/gene-eif2ak3	2	ddit3/eif2ak3	2	gene-ddit3/gene-eif2ak3	0
BP	GO:0061005	cell differentiation involved in kidney development	2/646	21/11595	0.32824619560704	0.879835930250304	gene-LOC122870658/gene-LOC122865952	2	LOC122865952/LOC122870658	1	gene-LOC122870658	1
BP	GO:0071216	cellular response to biotic stimulus	2/646	21/11595	0.32824619560704	0.879835930250304	gene-cmpk2/gene-LOC122868820	2	cmpk2/LOC122868820	1	gene-cmpk2	1
BP	GO:2000181	negative regulation of blood vessel morphogenesis	2/646	21/11595	0.32824619560704	0.879835930250304	gene-LOC122877917/gene-tafa5a	2	LOC122877917/tafa5a	1	gene-LOC122877917	1
BP	GO:0030178	negative regulation of Wnt signaling pathway	4/646	52/11595	0.328915408808689	0.879835930250304	gene-LOC122874938/gene-LOC122884881/gene-snai2/gene-tmem88a	4	LOC122874938/LOC122884881/snai2/tmem88a	0	-	4
BP	GO:0030335	positive regulation of cell migration	4/646	52/11595	0.328915408808689	0.879835930250304	gene-swap70a/gene-LOC122878127/gene-snai2/gene-LOC122871413	4	LOC122871413/LOC122878127/snai2/swap70a	2	gene-LOC122871413/gene-LOC122878127	2
BP	GO:0061008	hepaticobiliary system development	4/646	52/11595	0.328915408808689	0.879835930250304	gene-cebpa/gene-add3a/gene-id2a/gene-mrtfbb	4	add3a/cebpa/id2a/mrtfbb	2	gene-add3a/gene-cebpa	2
BP	GO:1903131	mononuclear cell differentiation	4/646	52/11595	0.328915408808689	0.879835930250304	gene-tusc2a/gene-LOC122878127/gene-znf296/gene-zbtb46	4	LOC122878127/tusc2a/zbtb46/znf296	2	gene-LOC122878127/gene-tusc2a	2
BP	GO:0051129	negative regulation of cellular component organization	12/646	185/11595	0.335514749537341	0.896095293795384	gene-swap70a/gene-pmepa1/gene-LOC122885147/gene-wdr54/gene-LOC122878127/gene-znf296/gene-spartb/gene-LOC122879509/gene-tmod4/gene-phldb2b/gene-nupr1b/gene-LOC122869242	12	LOC122869242/LOC122878127/LOC122879509/LOC122885147/nupr1b/phldb2b/pmepa1/spartb/swap70a/tmod4/wdr54/znf296	7	gene-LOC122869242/gene-LOC122878127/gene-LOC122879509/gene-LOC122885147/gene-nupr1b/gene-spartb/gene-tmod4	5
BP	GO:0006887	exocytosis	6/646	85/11595	0.336166141219272	0.896443043251391	gene-LOC122876750/gene-sytl4/gene-mroh1/gene-exoc3l2a/gene-si:dkey-196h17.9/gene-unc13d	6	exoc3l2a/LOC122876750/mroh1/si:dkey-196h17.9/sytl4/unc13d	4	gene-LOC122876750/gene-mroh1/gene-si:dkey-196h17.9/gene-unc13d	2
BP	GO:0030834	regulation of actin filament depolymerization	3/646	37/11595	0.340352486570005	0.903407983737676	gene-swap70a/gene-LOC122879509/gene-tmod4	3	LOC122879509/swap70a/tmod4	2	gene-LOC122879509/gene-tmod4	1
BP	GO:0042326	negative regulation of phosphorylation	3/646	37/11595	0.340352486570005	0.903407983737676	gene-LOC122886518/gene-klhl43/gene-nupr1b	3	klhl43/LOC122886518/nupr1b	3	gene-klhl43/gene-LOC122886518/gene-nupr1b	0
BP	GO:0051172	negative regulation of nitrogen compound metabolic process	19/646	305/11595	0.340353705501171	0.903407983737676	gene-swap70a/gene-znf703/gene-LOC122878127/gene-LOC122877917/gene-znf296/gene-zgc:162144/gene-id4/gene-snai2/gene-LOC122886518/gene-id2a/gene-klhl43/gene-jazf1a/gene-LOC122865952/gene-nupr1b/gene-cbx4/gene-cbx8a/gene-zfta/gene-bcl6b/gene-caprin2	19	bcl6b/caprin2/cbx4/cbx8a/id2a/id4/jazf1a/klhl43/LOC122865952/LOC122877917/LOC122878127/LOC122886518/nupr1b/snai2/swap70a/zfta/zgc:162144/znf296/znf703	8	gene-bcl6b/gene-caprin2/gene-klhl43/gene-LOC122877917/gene-LOC122878127/gene-LOC122886518/gene-nupr1b/gene-zgc:162144	11
BP	GO:2000147	positive regulation of cell motility	4/646	53/11595	0.341775852670913	0.90566270484809	gene-swap70a/gene-LOC122878127/gene-snai2/gene-LOC122871413	4	LOC122871413/LOC122878127/snai2/swap70a	2	gene-LOC122871413/gene-LOC122878127	2
BP	GO:0045892	negative regulation of transcription, DNA-templated	12/646	186/11595	0.342256254739104	0.90566270484809	gene-znf703/gene-LOC122877917/gene-znf296/gene-id4/gene-snai2/gene-id2a/gene-jazf1a/gene-LOC122865952/gene-cbx4/gene-cbx8a/gene-zfta/gene-bcl6b	12	bcl6b/cbx4/cbx8a/id2a/id4/jazf1a/LOC122865952/LOC122877917/snai2/zfta/znf296/znf703	2	gene-bcl6b/gene-LOC122877917	10
BP	GO:1901135	carbohydrate derivative metabolic process	30/646	496/11595	0.345851460565054	0.910956206330382	gene-dut/gene-ampd3a/gene-h6pd/gene-sulf2a/gene-LOC122872164/gene-pnp6/gene-gpia/gene-gck/gene-pde4ba/gene-ndnf/gene-macrod1/gene-aldob/gene-gfpt2/gene-nme5/gene-gpc4/gene-has1/gene-gapdhs/gene-LOC122883755/gene-LOC122882904/gene-LOC122883245/gene-LOC122886641/gene-b3gnt5b/gene-acaca/gene-cmpk2/gene-LOC122863823/gene-gnsb/gene-nupr1b/gene-LOC122869764/gene-dcn/gene-pfkfb3	30	acaca/aldob/ampd3a/b3gnt5b/cmpk2/dcn/dut/gapdhs/gck/gfpt2/gnsb/gpc4/gpia/h6pd/has1/LOC122863823/LOC122869764/LOC122872164/LOC122882904/LOC122883245/LOC122883755/LOC122886641/macrod1/ndnf/nme5/nupr1b/pde4ba/pfkfb3/pnp6/sulf2a	22	gene-acaca/gene-aldob/gene-b3gnt5b/gene-cmpk2/gene-dcn/gene-gapdhs/gene-gck/gene-gfpt2/gene-gnsb/gene-gpia/gene-h6pd/gene-LOC122869764/gene-LOC122872164/gene-LOC122883245/gene-LOC122883755/gene-LOC122886641/gene-macrod1/gene-nme5/gene-nupr1b/gene-pfkfb3/gene-pnp6/gene-sulf2a	8
BP	GO:0002263	cell activation involved in immune response	2/646	22/11595	0.348979128415715	0.910956206330382	gene-swap70a/gene-ifi35	2	ifi35/swap70a	1	gene-ifi35	1
BP	GO:0008593	regulation of Notch signaling pathway	2/646	22/11595	0.348979128415715	0.910956206330382	gene-angptl2b/gene-id2a	2	angptl2b/id2a	0	-	2
BP	GO:0032011	ARF protein signal transduction	2/646	22/11595	0.348979128415715	0.910956206330382	gene-arfgef3/gene-iqsec3a	2	arfgef3/iqsec3a	2	gene-arfgef3/gene-iqsec3a	0
BP	GO:0032012	regulation of ARF protein signal transduction	2/646	22/11595	0.348979128415715	0.910956206330382	gene-arfgef3/gene-iqsec3a	2	arfgef3/iqsec3a	2	gene-arfgef3/gene-iqsec3a	0
BP	GO:0043648	dicarboxylic acid metabolic process	2/646	22/11595	0.348979128415715	0.910956206330382	gene-hal/gene-aldh1l2	2	aldh1l2/hal	2	gene-aldh1l2/gene-hal	0
BP	GO:0051054	positive regulation of DNA metabolic process	2/646	22/11595	0.348979128415715	0.910956206330382	gene-LOC122877917/gene-cbx8a	2	cbx8a/LOC122877917	1	gene-LOC122877917	1
BP	GO:0070482	response to oxygen levels	2/646	22/11595	0.348979128415715	0.910956206330382	gene-ddit3/gene-eif2ak3	2	ddit3/eif2ak3	2	gene-ddit3/gene-eif2ak3	0
BP	GO:0120031	plasma membrane bounded cell projection assembly	12/646	187/11595	0.349023337192861	0.910956206330382	gene-si:ch211-286b5.4/gene-odad3/gene-mtss1la/gene-znf703/gene-vdac3/gene-LOC122878127/gene-amotl2a/gene-cep126/gene-ccdc13/gene-cfap410/gene-fzd2/gene-rpgrb	12	amotl2a/ccdc13/cep126/cfap410/fzd2/LOC122878127/mtss1la/odad3/rpgrb/si:ch211-286b5.4/vdac3/znf703	4	gene-ccdc13/gene-LOC122878127/gene-si:ch211-286b5.4/gene-vdac3	8
BP	GO:0019725	cellular homeostasis	7/646	103/11595	0.350283302921355	0.912859516704137	gene-swap70a/gene-nptx1l/gene-gck/gene-LOC122878127/gene-LOC122881776/gene-slc31a2/gene-LOC122868396	7	gck/LOC122868396/LOC122878127/LOC122881776/nptx1l/slc31a2/swap70a	6	gene-gck/gene-LOC122868396/gene-LOC122878127/gene-LOC122881776/gene-nptx1l/gene-slc31a2	1
BP	GO:0006875	cellular metal ion homeostasis	4/646	54/11595	0.354649667294387	0.917314726732604	gene-swap70a/gene-LOC122881776/gene-slc31a2/gene-LOC122868396	4	LOC122868396/LOC122881776/slc31a2/swap70a	3	gene-LOC122868396/gene-LOC122881776/gene-slc31a2	1
BP	GO:0030162	regulation of proteolysis	4/646	54/11595	0.354649667294387	0.917314726732604	gene-LOC122878127/gene-LOC122877917/gene-LOC122881737/gene-nupr1b	4	LOC122877917/LOC122878127/LOC122881737/nupr1b	3	gene-LOC122877917/gene-LOC122878127/gene-nupr1b	1
BP	GO:1902679	negative regulation of RNA biosynthetic process	12/646	188/11595	0.355813776402547	0.917314726732604	gene-znf703/gene-LOC122877917/gene-znf296/gene-id4/gene-snai2/gene-id2a/gene-jazf1a/gene-LOC122865952/gene-cbx4/gene-cbx8a/gene-zfta/gene-bcl6b	12	bcl6b/cbx4/cbx8a/id2a/id4/jazf1a/LOC122865952/LOC122877917/snai2/zfta/znf296/znf703	2	gene-bcl6b/gene-LOC122877917	10
BP	GO:1903507	negative regulation of nucleic acid-templated transcription	12/646	188/11595	0.355813776402547	0.917314726732604	gene-znf703/gene-LOC122877917/gene-znf296/gene-id4/gene-snai2/gene-id2a/gene-jazf1a/gene-LOC122865952/gene-cbx4/gene-cbx8a/gene-zfta/gene-bcl6b	12	bcl6b/cbx4/cbx8a/id2a/id4/jazf1a/LOC122865952/LOC122877917/snai2/zfta/znf296/znf703	2	gene-bcl6b/gene-LOC122877917	10
BP	GO:0001505	regulation of neurotransmitter levels	3/646	38/11595	0.355865764034833	0.917314726732604	gene-syt12/gene-LOC122882364/gene-LOC122871213	3	LOC122871213/LOC122882364/syt12	2	gene-LOC122882364/gene-syt12	1
BP	GO:0016236	macroautophagy	3/646	38/11595	0.355865764034833	0.917314726732604	gene-retreg1/gene-LOC122886528/gene-nupr1b	3	LOC122886528/nupr1b/retreg1	3	gene-LOC122886528/gene-nupr1b/gene-retreg1	0
BP	GO:0007369	gastrulation	6/646	87/11595	0.356259440382197	0.917314726732604	gene-snai1a/gene-LOC122877917/gene-gpc4/gene-phldb2b/gene-fzd2/gene-LOC122871826	6	fzd2/gpc4/LOC122871826/LOC122877917/phldb2b/snai1a	1	gene-LOC122877917	5
BP	GO:0048017	inositol lipid-mediated signaling	6/646	87/11595	0.356259440382197	0.917314726732604	gene-LOC122878127/gene-LOC122877917/gene-LOC122884209/gene-LOC122869242/gene-LOC122870088/gene-LOC122871413	6	LOC122869242/LOC122870088/LOC122871413/LOC122877917/LOC122878127/LOC122884209	4	gene-LOC122869242/gene-LOC122871413/gene-LOC122877917/gene-LOC122878127	2
BP	GO:0010243	response to organonitrogen compound	7/646	104/11595	0.359485628881783	0.92285862936816	gene-LOC122864683/gene-LOC122878127/gene-LOC122877917/gene-pid1/gene-irs2b/gene-baiap2l1a/gene-si:ch73-335l21.1	7	baiap2l1a/irs2b/LOC122864683/LOC122877917/LOC122878127/pid1/si:ch73-335l21.1	4	gene-baiap2l1a/gene-LOC122864683/gene-LOC122877917/gene-LOC122878127	3
BP	GO:0044282	small molecule catabolic process	7/646	104/11595	0.359485628881783	0.92285862936816	gene-hal/gene-ddah1/gene-aldh5a1/gene-LOC122883755/gene-lpin1b/gene-enosf1/gene-aldh1l2	7	aldh1l2/aldh5a1/ddah1/enosf1/hal/LOC122883755/lpin1b	6	gene-aldh1l2/gene-aldh5a1/gene-enosf1/gene-hal/gene-LOC122883755/gene-lpin1b	1
BP	GO:0051656	establishment of organelle localization	5/646	71/11595	0.36213499896225	0.928274512988181	gene-terb1/gene-LOC122877630/gene-LOC122885551/gene-LOC122886528/gene-sapcd1	5	LOC122877630/LOC122885551/LOC122886528/sapcd1/terb1	5	gene-LOC122877630/gene-LOC122885551/gene-LOC122886528/gene-sapcd1/gene-terb1	0
BP	GO:0007018	microtubule-based movement	11/646	172/11595	0.362918776249637	0.928899248734189	gene-kif28/gene-si:ch211-286b5.4/gene-odad3/gene-kif21a/gene-dnah10/gene-dnah12/gene-LOC122886528/gene-kif1ab/gene-kif26bb/gene-LOC122863271/gene-rpgrb	11	dnah10/dnah12/kif1ab/kif21a/kif26bb/kif28/LOC122863271/LOC122886528/odad3/rpgrb/si:ch211-286b5.4	9	gene-dnah10/gene-dnah12/gene-kif1ab/gene-kif21a/gene-kif26bb/gene-kif28/gene-LOC122863271/gene-LOC122886528/gene-si:ch211-286b5.4	2
BP	GO:0048732	gland development	6/646	88/11595	0.366339399160175	0.932390212067658	gene-cebpa/gene-lnx2b/gene-snai2/gene-id2a/gene-tnca/gene-mrtfbb	6	cebpa/id2a/lnx2b/mrtfbb/snai2/tnca	1	gene-cebpa	5
BP	GO:0051272	positive regulation of cellular component movement	4/646	55/11595	0.367522497666219	0.932390212067658	gene-swap70a/gene-LOC122878127/gene-snai2/gene-LOC122871413	4	LOC122871413/LOC122878127/snai2/swap70a	2	gene-LOC122871413/gene-LOC122878127	2
BP	GO:0044093	positive regulation of molecular function	21/646	345/11595	0.368927244920793	0.932390212067658	gene-tbc1d9/gene-dok7b/gene-si:dkey-91m11.5/gene-arhgap25/gene-sgsm1a/gene-LOC122877917/gene-rap1gap2a/gene-LOC122881737/gene-rasgrp3/gene-asap1a/gene-zmp:0000001168/gene-LOC122864981/gene-arhgap24/gene-arhgap27/gene-si:dkey-191m6.4/gene-rundc1/gene-sgsm3/gene-zmp:0000000896/gene-LOC122869489/gene-tbc1d30/gene-LOC122872132	21	arhgap24/arhgap25/arhgap27/asap1a/dok7b/LOC122864981/LOC122869489/LOC122872132/LOC122877917/LOC122881737/rap1gap2a/rasgrp3/rundc1/sgsm1a/sgsm3/si:dkey-191m6.4/si:dkey-91m11.5/tbc1d30/tbc1d9/zmp:0000000896/zmp:0000001168	12	gene-arhgap25/gene-asap1a/gene-LOC122864981/gene-LOC122877917/gene-rap1gap2a/gene-rasgrp3/gene-rundc1/gene-sgsm1a/gene-sgsm3/gene-si:dkey-191m6.4/gene-tbc1d30/gene-zmp:0000001168	9
BP	GO:0007050	cell cycle arrest	2/646	23/11595	0.369490684042532	0.932390212067658	gene-brinp3a.2/gene-LOC122887176	2	brinp3a.2/LOC122887176	0	-	2
BP	GO:0018958	phenol-containing compound metabolic process	2/646	23/11595	0.369490684042532	0.932390212067658	gene-ddc/gene-LOC122888177	2	ddc/LOC122888177	1	gene-ddc	1
BP	GO:0030239	myofibril assembly	2/646	23/11595	0.369490684042532	0.932390212067658	gene-lrrc39/gene-tmod4	2	lrrc39/tmod4	2	gene-lrrc39/gene-tmod4	0
BP	GO:0050684	regulation of mRNA processing	2/646	23/11595	0.369490684042532	0.932390212067658	gene-LOC122872991/gene-srrm4	2	LOC122872991/srrm4	2	gene-LOC122872991/gene-srrm4	0
BP	GO:0051962	positive regulation of nervous system development	2/646	23/11595	0.369490684042532	0.932390212067658	gene-LOC122878127/gene-znf296	2	LOC122878127/znf296	1	gene-LOC122878127	1
BP	GO:0046903	secretion	10/646	156/11595	0.370447249748969	0.932390212067658	gene-LOC122876750/gene-syt12/gene-gck/gene-sytl4/gene-mroh1/gene-LOC122882364/gene-exoc3l2a/gene-si:dkey-196h17.9/gene-unc13d/gene-LOC122871213	10	exoc3l2a/gck/LOC122871213/LOC122876750/LOC122882364/mroh1/si:dkey-196h17.9/syt12/sytl4/unc13d	7	gene-gck/gene-LOC122876750/gene-LOC122882364/gene-mroh1/gene-si:dkey-196h17.9/gene-syt12/gene-unc13d	3
BP	GO:0051240	positive regulation of multicellular organismal process	9/646	139/11595	0.370451759182139	0.932390212067658	gene-tusc2a/gene-tlr3/gene-LOC122878127/gene-LOC122877917/gene-znf296/gene-zbtb46/gene-mrtfbb/gene-caprin2/gene-LOC122872132	9	caprin2/LOC122872132/LOC122877917/LOC122878127/mrtfbb/tlr3/tusc2a/zbtb46/znf296	4	gene-caprin2/gene-LOC122877917/gene-LOC122878127/gene-tusc2a	5
BP	GO:0009913	epidermal cell differentiation	3/646	39/11595	0.371329822829271	0.932390212067658	gene-LOC122877917/gene-LOC122882909/gene-LOC122882907	3	LOC122877917/LOC122882907/LOC122882909	3	gene-LOC122877917/gene-LOC122882907/gene-LOC122882909	0
BP	GO:0055076	transition metal ion homeostasis	3/646	39/11595	0.371329822829271	0.932390212067658	gene-LOC122881776/gene-slc31a2/gene-LOC122868396	3	LOC122868396/LOC122881776/slc31a2	3	gene-LOC122868396/gene-LOC122881776/gene-slc31a2	0
BP	GO:1902115	regulation of organelle assembly	3/646	39/11595	0.371329822829271	0.932390212067658	gene-nptx1l/gene-vdac3/gene-nupr1b	3	nptx1l/nupr1b/vdac3	3	gene-nptx1l/gene-nupr1b/gene-vdac3	0
BP	GO:0043085	positive regulation of catalytic activity	19/646	311/11595	0.372241657252682	0.932483799624146	gene-tbc1d9/gene-dok7b/gene-si:dkey-91m11.5/gene-arhgap25/gene-sgsm1a/gene-LOC122877917/gene-rap1gap2a/gene-LOC122881737/gene-rasgrp3/gene-asap1a/gene-zmp:0000001168/gene-LOC122864981/gene-arhgap24/gene-arhgap27/gene-si:dkey-191m6.4/gene-rundc1/gene-sgsm3/gene-LOC122869489/gene-tbc1d30	19	arhgap24/arhgap25/arhgap27/asap1a/dok7b/LOC122864981/LOC122869489/LOC122877917/LOC122881737/rap1gap2a/rasgrp3/rundc1/sgsm1a/sgsm3/si:dkey-191m6.4/si:dkey-91m11.5/tbc1d30/tbc1d9/zmp:0000001168	12	gene-arhgap25/gene-asap1a/gene-LOC122864981/gene-LOC122877917/gene-rap1gap2a/gene-rasgrp3/gene-rundc1/gene-sgsm1a/gene-sgsm3/gene-si:dkey-191m6.4/gene-tbc1d30/gene-zmp:0000001168	7
BP	GO:0061024	membrane organization	7/646	106/11595	0.377945934832554	0.932483799624146	gene-LOC122875390/gene-mtss1la/gene-LOC122878347/gene-LOC122863926/gene-ndrg1a/gene-baiap2l1a/gene-LOC122871278	7	baiap2l1a/LOC122863926/LOC122871278/LOC122875390/LOC122878347/mtss1la/ndrg1a	6	gene-baiap2l1a/gene-LOC122863926/gene-LOC122871278/gene-LOC122875390/gene-LOC122878347/gene-ndrg1a	1
BP	GO:0001558	regulation of cell growth	4/646	56/11595	0.380380526256695	0.932483799624146	gene-omgb/gene-znf296/gene-spartb/gene-pard6gb	4	omgb/pard6gb/spartb/znf296	2	gene-omgb/gene-spartb	2
BP	GO:0032273	positive regulation of protein polymerization	4/646	56/11595	0.380380526256695	0.932483799624146	gene-tppp3/gene-fmn2a/gene-LOC122861414/gene-fmn1	4	fmn1/fmn2a/LOC122861414/tppp3	2	gene-fmn1/gene-LOC122861414	2
BP	GO:0033043	regulation of organelle organization	17/646	278/11595	0.381222099040222	0.932483799624146	gene-swap70a/gene-LOC122885147/gene-nptx1l/gene-cntrl/gene-znf703/gene-vdac3/gene-LOC122878127/gene-LOC122879509/gene-tmod4/gene-fmn2a/gene-LOC122886528/gene-snai2/gene-LOC122861414/gene-fmn1/gene-phldb2b/gene-baiap2l1a/gene-nupr1b	17	baiap2l1a/cntrl/fmn1/fmn2a/LOC122861414/LOC122878127/LOC122879509/LOC122885147/LOC122886528/nptx1l/nupr1b/phldb2b/snai2/swap70a/tmod4/vdac3/znf703	12	gene-baiap2l1a/gene-cntrl/gene-fmn1/gene-LOC122861414/gene-LOC122878127/gene-LOC122879509/gene-LOC122885147/gene-LOC122886528/gene-nptx1l/gene-nupr1b/gene-tmod4/gene-vdac3	5
BP	GO:0007389	pattern specification process	12/646	192/11595	0.383164786069077	0.932483799624146	gene-skib/gene-snai1a/gene-LOC122874938/gene-znf703/gene-amotl2a/gene-tdrd6/gene-LOC122869123/gene-fzd2/gene-cacna1c/gene-caprin2/gene-rpgrb/gene-LOC122871826	12	amotl2a/cacna1c/caprin2/fzd2/LOC122869123/LOC122871826/LOC122874938/rpgrb/skib/snai1a/tdrd6/znf703	3	gene-caprin2/gene-LOC122869123/gene-tdrd6	9
BP	GO:0016049	cell growth	5/646	73/11595	0.384604335566252	0.932483799624146	gene-omgb/gene-znf296/gene-spartb/gene-gpc4/gene-pard6gb	5	gpc4/omgb/pard6gb/spartb/znf296	2	gene-omgb/gene-spartb	3
BP	GO:0006694	steroid biosynthetic process	3/646	40/11595	0.386722813182531	0.932483799624146	gene-snai2/gene-rdh8a/gene-LOC122871599	3	LOC122871599/rdh8a/snai2	1	gene-LOC122871599	2
BP	GO:0031331	positive regulation of cellular catabolic process	3/646	40/11595	0.386722813182531	0.932483799624146	gene-LOC122886528/gene-nupr1b/gene-dcn	3	dcn/LOC122886528/nupr1b	3	gene-dcn/gene-LOC122886528/gene-nupr1b	0
BP	GO:0045010	actin nucleation	3/646	40/11595	0.386722813182531	0.932483799624146	gene-fmn2a/gene-LOC122861414/gene-fmn1	3	fmn1/fmn2a/LOC122861414	2	gene-fmn1/gene-LOC122861414	1
BP	GO:0007268	chemical synaptic transmission	8/646	124/11595	0.387093952512897	0.932483799624146	gene-LOC122876750/gene-nptx1l/gene-syt12/gene-nlgn1/gene-LOC122881246/gene-sv2a/gene-LOC122882364/gene-LOC122871213	8	LOC122871213/LOC122876750/LOC122881246/LOC122882364/nlgn1/nptx1l/sv2a/syt12	6	gene-LOC122876750/gene-LOC122882364/gene-nlgn1/gene-nptx1l/gene-sv2a/gene-syt12	2
BP	GO:0043010	camera-type eye development	8/646	124/11595	0.387093952512897	0.932483799624146	gene-znf703/gene-LOC122877917/gene-zgc:162144/gene-crybb1l1/gene-sox4b/gene-cryba2b/gene-id2a/gene-rpgrb	8	cryba2b/crybb1l1/id2a/LOC122877917/rpgrb/sox4b/zgc:162144/znf703	4	gene-cryba2b/gene-crybb1l1/gene-LOC122877917/gene-zgc:162144	4
BP	GO:0098916	anterograde trans-synaptic signaling	8/646	124/11595	0.387093952512897	0.932483799624146	gene-LOC122876750/gene-nptx1l/gene-syt12/gene-nlgn1/gene-LOC122881246/gene-sv2a/gene-LOC122882364/gene-LOC122871213	8	LOC122871213/LOC122876750/LOC122881246/LOC122882364/nlgn1/nptx1l/sv2a/syt12	6	gene-LOC122876750/gene-LOC122882364/gene-nlgn1/gene-nptx1l/gene-sv2a/gene-syt12	2
BP	GO:0099537	trans-synaptic signaling	8/646	124/11595	0.387093952512897	0.932483799624146	gene-LOC122876750/gene-nptx1l/gene-syt12/gene-nlgn1/gene-LOC122881246/gene-sv2a/gene-LOC122882364/gene-LOC122871213	8	LOC122871213/LOC122876750/LOC122881246/LOC122882364/nlgn1/nptx1l/sv2a/syt12	6	gene-LOC122876750/gene-LOC122882364/gene-nlgn1/gene-nptx1l/gene-sv2a/gene-syt12	2
BP	GO:0006612	protein targeting to membrane	2/646	24/11595	0.389741196397852	0.932483799624146	gene-LOC122878347/gene-LOC122863926	2	LOC122863926/LOC122878347	2	gene-LOC122863926/gene-LOC122878347	0
BP	GO:0031214	biomineral tissue development	2/646	24/11595	0.389741196397852	0.932483799624146	gene-pth4/gene-pthlha	2	pth4/pthlha	1	gene-pth4	1
BP	GO:0051091	positive regulation of DNA-binding transcription factor activity	2/646	24/11595	0.389741196397852	0.932483799624146	gene-zmp:0000000896/gene-LOC122872132	2	LOC122872132/zmp:0000000896	0	-	2
BP	GO:0055007	cardiac muscle cell differentiation	2/646	24/11595	0.389741196397852	0.932483799624146	gene-tmem88a/gene-pdzph1	2	pdzph1/tmem88a	1	gene-pdzph1	1
BP	GO:0110148	biomineralization	2/646	24/11595	0.389741196397852	0.932483799624146	gene-pth4/gene-pthlha	2	pth4/pthlha	1	gene-pth4	1
BP	GO:1901343	negative regulation of vasculature development	2/646	24/11595	0.389741196397852	0.932483799624146	gene-LOC122877917/gene-tafa5a	2	LOC122877917/tafa5a	1	gene-LOC122877917	1
BP	GO:0030031	cell projection assembly	12/646	193/11595	0.390038825447587	0.932483799624146	gene-si:ch211-286b5.4/gene-odad3/gene-mtss1la/gene-znf703/gene-vdac3/gene-LOC122878127/gene-amotl2a/gene-cep126/gene-ccdc13/gene-cfap410/gene-fzd2/gene-rpgrb	12	amotl2a/ccdc13/cep126/cfap410/fzd2/LOC122878127/mtss1la/odad3/rpgrb/si:ch211-286b5.4/vdac3/znf703	4	gene-ccdc13/gene-LOC122878127/gene-si:ch211-286b5.4/gene-vdac3	8
BP	GO:0051253	negative regulation of RNA metabolic process	12/646	193/11595	0.390038825447587	0.932483799624146	gene-znf703/gene-LOC122877917/gene-znf296/gene-id4/gene-snai2/gene-id2a/gene-jazf1a/gene-LOC122865952/gene-cbx4/gene-cbx8a/gene-zfta/gene-bcl6b	12	bcl6b/cbx4/cbx8a/id2a/id4/jazf1a/LOC122865952/LOC122877917/snai2/zfta/znf296/znf703	2	gene-bcl6b/gene-LOC122877917	10
BP	GO:0040007	growth	11/646	176/11595	0.391665479240269	0.932483799624146	gene-ccn1/gene-omgb/gene-znf296/gene-spartb/gene-gpc4/gene-kdm6bb/gene-pard6gb/gene-tnca/gene-fzd2/gene-dcn/gene-cacna1c	11	cacna1c/ccn1/dcn/fzd2/gpc4/kdm6bb/omgb/pard6gb/spartb/tnca/znf296	3	gene-dcn/gene-omgb/gene-spartb	8
BP	GO:0001775	cell activation	10/646	159/11595	0.393186656438824	0.932483799624146	gene-swap70a/gene-tusc2a/gene-LOC122873767/gene-LOC122875406/gene-LOC122878127/gene-znf296/gene-wdfy4/gene-ndrg1a/gene-ifi35/gene-LOC122869242	10	ifi35/LOC122869242/LOC122873767/LOC122875406/LOC122878127/ndrg1a/swap70a/tusc2a/wdfy4/znf296	8	gene-ifi35/gene-LOC122869242/gene-LOC122873767/gene-LOC122875406/gene-LOC122878127/gene-ndrg1a/gene-tusc2a/gene-wdfy4	2
BP	GO:0050776	regulation of immune response	10/646	159/11595	0.393186656438824	0.932483799624146	gene-tespa1/gene-LOC122873342/gene-LOC122874995/gene-irf1b/gene-LOC122868841/gene-ifi35/gene-LOC122869242/gene-LOC122870587/gene-LOC122869735/gene-LOC122869738	10	ifi35/irf1b/LOC122868841/LOC122869242/LOC122869735/LOC122869738/LOC122870587/LOC122873342/LOC122874995/tespa1	9	gene-ifi35/gene-irf1b/gene-LOC122868841/gene-LOC122869242/gene-LOC122869735/gene-LOC122869738/gene-LOC122870587/gene-LOC122873342/gene-LOC122874995	1
BP	GO:0023061	signal release	4/646	57/11595	0.393210486837994	0.932483799624146	gene-syt12/gene-gck/gene-LOC122882364/gene-LOC122871213	4	gck/LOC122871213/LOC122882364/syt12	3	gene-gck/gene-LOC122882364/gene-syt12	1
BP	GO:0040017	positive regulation of locomotion	4/646	57/11595	0.393210486837994	0.932483799624146	gene-swap70a/gene-LOC122878127/gene-snai2/gene-LOC122871413	4	LOC122871413/LOC122878127/snai2/swap70a	2	gene-LOC122871413/gene-LOC122878127	2
BP	GO:0010256	endomembrane system organization	6/646	91/11595	0.396628874976681	0.932483799624146	gene-LOC122875390/gene-mtss1la/gene-esyt1a/gene-ndrg1a/gene-baiap2l1a/gene-LOC122871278	6	baiap2l1a/esyt1a/LOC122871278/LOC122875390/mtss1la/ndrg1a	4	gene-baiap2l1a/gene-LOC122871278/gene-LOC122875390/gene-ndrg1a	2
BP	GO:0051493	regulation of cytoskeleton organization	11/646	177/11595	0.398881529845759	0.932483799624146	gene-swap70a/gene-LOC122885147/gene-cntrl/gene-LOC122878127/gene-LOC122879509/gene-tmod4/gene-fmn2a/gene-LOC122861414/gene-fmn1/gene-phldb2b/gene-baiap2l1a	11	baiap2l1a/cntrl/fmn1/fmn2a/LOC122861414/LOC122878127/LOC122879509/LOC122885147/phldb2b/swap70a/tmod4	8	gene-baiap2l1a/gene-cntrl/gene-fmn1/gene-LOC122861414/gene-LOC122878127/gene-LOC122879509/gene-LOC122885147/gene-tmod4	3
BP	GO:0009887	animal organ morphogenesis	16/646	264/11595	0.400748215708348	0.932483799624146	gene-skib/gene-lamb3/gene-znf703/gene-lrrc39/gene-gpc4/gene-cadm4/gene-sox4b/gene-snai2/gene-id2a/gene-tnca/gene-fzd2/gene-mrtfbb/gene-pthlha/gene-cacna1c/gene-sapcd1/gene-rpgrb	16	cacna1c/cadm4/fzd2/gpc4/id2a/lamb3/lrrc39/mrtfbb/pthlha/rpgrb/sapcd1/skib/snai2/sox4b/tnca/znf703	4	gene-cadm4/gene-lamb3/gene-lrrc39/gene-sapcd1	12
BP	GO:0002244	hematopoietic progenitor cell differentiation	3/646	41/11595	0.402024305881957	0.932483799624146	gene-angptl2b/gene-tgfb3/gene-nfkbiaa	3	angptl2b/nfkbiaa/tgfb3	1	gene-nfkbiaa	2
BP	GO:0016485	protein processing	3/646	41/11595	0.402024305881957	0.932483799624146	gene-plat/gene-LOC122870952/gene-LOC122871823	3	LOC122870952/LOC122871823/plat	2	gene-LOC122870952/gene-plat	1
BP	GO:0031346	positive regulation of cell projection organization	3/646	41/11595	0.402024305881957	0.932483799624146	gene-LOC122878127/gene-ndnf/gene-znf296	3	LOC122878127/ndnf/znf296	1	gene-LOC122878127	2
BP	GO:0006873	cellular ion homeostasis	4/646	58/11595	0.405999675024772	0.932483799624146	gene-swap70a/gene-LOC122881776/gene-slc31a2/gene-LOC122868396	4	LOC122868396/LOC122881776/slc31a2/swap70a	3	gene-LOC122868396/gene-LOC122881776/gene-slc31a2	1
BP	GO:0030003	cellular cation homeostasis	4/646	58/11595	0.405999675024772	0.932483799624146	gene-swap70a/gene-LOC122881776/gene-slc31a2/gene-LOC122868396	4	LOC122868396/LOC122881776/slc31a2/swap70a	3	gene-LOC122868396/gene-LOC122881776/gene-slc31a2	1
BP	GO:0007411	axon guidance	5/646	75/11595	0.407034098429238	0.932483799624146	gene-vegfc/gene-emb/gene-myot/gene-LOC122888546/gene-boc	5	boc/emb/LOC122888546/myot/vegfc	2	gene-emb/gene-myot	3
BP	GO:0071345	cellular response to cytokine stimulus	5/646	75/11595	0.407034098429238	0.932483799624146	gene-cxcl12b/gene-LOC122878212/gene-LOC122877917/gene-csf1ra/gene-LOC122868174	5	csf1ra/cxcl12b/LOC122868174/LOC122877917/LOC122878212	4	gene-csf1ra/gene-LOC122868174/gene-LOC122877917/gene-LOC122878212	1
BP	GO:0019220	regulation of phosphate metabolic process	10/646	161/11595	0.408390986931688	0.932483799624146	gene-swap70a/gene-dok7b/gene-ppp1r27b/gene-LOC122878127/gene-zgc:162144/gene-zgc:92242/gene-LOC122886518/gene-klhl43/gene-nupr1b/gene-LOC122871413	10	dok7b/klhl43/LOC122871413/LOC122878127/LOC122886518/nupr1b/ppp1r27b/swap70a/zgc:162144/zgc:92242	8	gene-klhl43/gene-LOC122871413/gene-LOC122878127/gene-LOC122886518/gene-nupr1b/gene-ppp1r27b/gene-zgc:162144/gene-zgc:92242	2
BP	GO:0051174	regulation of phosphorus metabolic process	10/646	161/11595	0.408390986931688	0.932483799624146	gene-swap70a/gene-dok7b/gene-ppp1r27b/gene-LOC122878127/gene-zgc:162144/gene-zgc:92242/gene-LOC122886518/gene-klhl43/gene-nupr1b/gene-LOC122871413	10	dok7b/klhl43/LOC122871413/LOC122878127/LOC122886518/nupr1b/ppp1r27b/swap70a/zgc:162144/zgc:92242	8	gene-klhl43/gene-LOC122871413/gene-LOC122878127/gene-LOC122886518/gene-nupr1b/gene-ppp1r27b/gene-zgc:162144/gene-zgc:92242	2
BP	GO:0000082	G1/S transition of mitotic cell cycle	2/646	25/11595	0.409696092499267	0.932483799624146	gene-LOC122877917/gene-LOC122865952	2	LOC122865952/LOC122877917	1	gene-LOC122877917	1
BP	GO:0006094	gluconeogenesis	2/646	25/11595	0.409696092499267	0.932483799624146	gene-gpia/gene-pck2	2	gpia/pck2	2	gene-gpia/gene-pck2	0
BP	GO:0010921	regulation of phosphatase activity	2/646	25/11595	0.409696092499267	0.932483799624146	gene-ppp1r27b/gene-zgc:92242	2	ppp1r27b/zgc:92242	2	gene-ppp1r27b/gene-zgc:92242	0
BP	GO:0019319	hexose biosynthetic process	2/646	25/11595	0.409696092499267	0.932483799624146	gene-gpia/gene-pck2	2	gpia/pck2	2	gene-gpia/gene-pck2	0
BP	GO:0035270	endocrine system development	2/646	25/11595	0.409696092499267	0.932483799624146	gene-sox4b/gene-fzd2	2	fzd2/sox4b	0	-	2
BP	GO:0043409	negative regulation of MAPK cascade	2/646	25/11595	0.409696092499267	0.932483799624146	gene-LOC122877917/gene-klhl43	2	klhl43/LOC122877917	2	gene-klhl43/gene-LOC122877917	0
BP	GO:0046364	monosaccharide biosynthetic process	2/646	25/11595	0.409696092499267	0.932483799624146	gene-gpia/gene-pck2	2	gpia/pck2	2	gene-gpia/gene-pck2	0
BP	GO:0044092	negative regulation of molecular function	9/646	145/11595	0.418705851535499	0.932483799624146	gene-cttnbp2nla/gene-ppp1r27b/gene-adgrv1/gene-LOC122877917/gene-zgc:162144/gene-zgc:92242/gene-LOC122886797/gene-nupr1b/gene-LOC122869242	9	adgrv1/cttnbp2nla/LOC122869242/LOC122877917/LOC122886797/nupr1b/ppp1r27b/zgc:162144/zgc:92242	8	gene-adgrv1/gene-LOC122869242/gene-LOC122877917/gene-LOC122886797/gene-nupr1b/gene-ppp1r27b/gene-zgc:162144/gene-zgc:92242	1
BP	GO:0006164	purine nucleotide biosynthetic process	6/646	94/11595	0.426853170298691	0.932483799624146	gene-ampd3a/gene-zgc:162144/gene-nme5/gene-LOC122882904/gene-acaca/gene-LOC122869764	6	acaca/ampd3a/LOC122869764/LOC122882904/nme5/zgc:162144	4	gene-acaca/gene-LOC122869764/gene-nme5/gene-zgc:162144	2
BP	GO:0016331	morphogenesis of embryonic epithelium	2/646	26/11595	0.429325449565319	0.932483799624146	gene-sox4b/gene-pard6gb	2	pard6gb/sox4b	0	-	2
BP	GO:0042278	purine nucleoside metabolic process	2/646	26/11595	0.429325449565319	0.932483799624146	gene-macrod1/gene-nme5	2	macrod1/nme5	2	gene-macrod1/gene-nme5	0
BP	GO:0042398	cellular modified amino acid biosynthetic process	2/646	26/11595	0.429325449565319	0.932483799624146	gene-bbox1/gene-LOC122874604	2	bbox1/LOC122874604	0	-	2
BP	GO:0043588	skin development	2/646	26/11595	0.429325449565319	0.932483799624146	gene-LOC122882909/gene-LOC122882907	2	LOC122882907/LOC122882909	2	gene-LOC122882907/gene-LOC122882909	0
BP	GO:0045926	negative regulation of growth	2/646	26/11595	0.429325449565319	0.932483799624146	gene-znf296/gene-spartb	2	spartb/znf296	1	gene-spartb	1
BP	GO:2000241	regulation of reproductive process	2/646	26/11595	0.429325449565319	0.932483799624146	gene-tdrd6/gene-nupr1b	2	nupr1b/tdrd6	2	gene-nupr1b/gene-tdrd6	0
BP	GO:0043244	regulation of protein-containing complex disassembly	4/646	60/11595	0.431407768097987	0.932483799624146	gene-swap70a/gene-LOC122879509/gene-tmod4/gene-LOC122886528	4	LOC122879509/LOC122886528/swap70a/tmod4	3	gene-LOC122879509/gene-LOC122886528/gene-tmod4	1
BP	GO:0051261	protein depolymerization	4/646	60/11595	0.431407768097987	0.932483799624146	gene-swap70a/gene-LOC122879509/gene-tmod4/gene-LOC122871423	4	LOC122871423/LOC122879509/swap70a/tmod4	3	gene-LOC122871423/gene-LOC122879509/gene-tmod4	1
BP	GO:1902905	positive regulation of supramolecular fiber organization	4/646	60/11595	0.431407768097987	0.932483799624146	gene-swap70a/gene-fmn2a/gene-LOC122861414/gene-fmn1	4	fmn1/fmn2a/LOC122861414/swap70a	2	gene-fmn1/gene-LOC122861414	2
BP	GO:0009896	positive regulation of catabolic process	3/646	43/11595	0.432278025302074	0.932483799624146	gene-LOC122886528/gene-nupr1b/gene-dcn	3	dcn/LOC122886528/nupr1b	3	gene-dcn/gene-LOC122886528/gene-nupr1b	0
BP	GO:0002090	regulation of receptor internalization	1/646	10/11595	0.436443417646445	0.932483799624146	gene-wdr54	1	wdr54	0	-	1
BP	GO:0002526	acute inflammatory response	1/646	10/11595	0.436443417646445	0.932483799624146	gene-nupr1b	1	nupr1b	1	gene-nupr1b	0
BP	GO:0002688	regulation of leukocyte chemotaxis	1/646	10/11595	0.436443417646445	0.932483799624146	gene-swap70a	1	swap70a	0	-	1
BP	GO:0003146	heart jogging	1/646	10/11595	0.436443417646445	0.932483799624146	gene-fzd2	1	fzd2	0	-	1
BP	GO:0003300	cardiac muscle hypertrophy	1/646	10/11595	0.436443417646445	0.932483799624146	gene-cacna1c	1	cacna1c	0	-	1
BP	GO:0006144	purine nucleobase metabolic process	1/646	10/11595	0.436443417646445	0.932483799624146	gene-gda	1	gda	1	gene-gda	0
BP	GO:0008210	estrogen metabolic process	1/646	10/11595	0.436443417646445	0.932483799624146	gene-rdh8a	1	rdh8a	0	-	1
BP	GO:0009086	methionine biosynthetic process	1/646	10/11595	0.436443417646445	0.932483799624146	gene-LOC122876938	1	LOC122876938	1	gene-LOC122876938	0
BP	GO:0009584	detection of visible light	1/646	10/11595	0.436443417646445	0.932483799624146	gene-grk1a	1	grk1a	1	gene-grk1a	0
BP	GO:0010770	positive regulation of cell morphogenesis involved in differentiation	1/646	10/11595	0.436443417646445	0.932483799624146	gene-LOC122874995	1	LOC122874995	1	gene-LOC122874995	0
BP	GO:0014897	striated muscle hypertrophy	1/646	10/11595	0.436443417646445	0.932483799624146	gene-cacna1c	1	cacna1c	0	-	1
BP	GO:0016574	histone ubiquitination	1/646	10/11595	0.436443417646445	0.932483799624146	gene-cbx8a	1	cbx8a	0	-	1
BP	GO:0019827	stem cell population maintenance	1/646	10/11595	0.436443417646445	0.932483799624146	gene-LOC122877917	1	LOC122877917	1	gene-LOC122877917	0
BP	GO:0021884	forebrain neuron development	1/646	10/11595	0.436443417646445	0.932483799624146	gene-ndnf	1	ndnf	0	-	1
BP	GO:0030278	regulation of ossification	1/646	10/11595	0.436443417646445	0.932483799624146	gene-tgfb3	1	tgfb3	0	-	1
BP	GO:0031960	response to corticosteroid	1/646	10/11595	0.436443417646445	0.932483799624146	gene-LOC122878127	1	LOC122878127	1	gene-LOC122878127	0
BP	GO:0032784	regulation of DNA-templated transcription, elongation	1/646	10/11595	0.436443417646445	0.932483799624146	gene-LOC122880569	1	LOC122880569	1	gene-LOC122880569	0
BP	GO:0035118	embryonic pectoral fin morphogenesis	1/646	10/11595	0.436443417646445	0.932483799624146	gene-sp8a	1	sp8a	0	-	1
BP	GO:0035601	protein deacylation	1/646	10/11595	0.436443417646445	0.932483799624146	gene-znf703	1	znf703	0	-	1
BP	GO:0036158	outer dynein arm assembly	1/646	10/11595	0.436443417646445	0.932483799624146	gene-odad3	1	odad3	0	-	1
BP	GO:0046661	male sex differentiation	1/646	10/11595	0.436443417646445	0.932483799624146	gene-nupr1b	1	nupr1b	1	gene-nupr1b	0
BP	GO:0048009	insulin-like growth factor receptor signaling pathway	1/646	10/11595	0.436443417646445	0.932483799624146	gene-LOC122878127	1	LOC122878127	1	gene-LOC122878127	0
BP	GO:0050853	B cell receptor signaling pathway	1/646	10/11595	0.436443417646445	0.932483799624146	gene-LOC122870587	1	LOC122870587	1	gene-LOC122870587	0
BP	GO:0051099	positive regulation of binding	1/646	10/11595	0.436443417646445	0.932483799624146	gene-LOC122877917	1	LOC122877917	1	gene-LOC122877917	0
BP	GO:0051568	histone H3-K4 methylation	1/646	10/11595	0.436443417646445	0.932483799624146	gene-gfi1aa	1	gfi1aa	1	gene-gfi1aa	0
BP	GO:0060349	bone morphogenesis	1/646	10/11595	0.436443417646445	0.932483799624146	gene-gpc4	1	gpc4	0	-	1
BP	GO:0060541	respiratory system development	1/646	10/11595	0.436443417646445	0.932483799624146	gene-tnca	1	tnca	0	-	1
BP	GO:0060900	embryonic camera-type eye formation	1/646	10/11595	0.436443417646445	0.932483799624146	gene-sox4b	1	sox4b	0	-	1
BP	GO:0061326	renal tubule development	1/646	10/11595	0.436443417646445	0.932483799624146	gene-LOC122888062	1	LOC122888062	1	gene-LOC122888062	0
BP	GO:0062207	regulation of pattern recognition receptor signaling pathway	1/646	10/11595	0.436443417646445	0.932483799624146	gene-ifi35	1	ifi35	1	gene-ifi35	0
BP	GO:0070849	response to epidermal growth factor	1/646	10/11595	0.436443417646445	0.932483799624146	gene-snai2	1	snai2	0	-	1
BP	GO:0071322	cellular response to carbohydrate stimulus	1/646	10/11595	0.436443417646445	0.932483799624146	gene-nptx1l	1	nptx1l	1	gene-nptx1l	0
BP	GO:0071326	cellular response to monosaccharide stimulus	1/646	10/11595	0.436443417646445	0.932483799624146	gene-nptx1l	1	nptx1l	1	gene-nptx1l	0
BP	GO:0071331	cellular response to hexose stimulus	1/646	10/11595	0.436443417646445	0.932483799624146	gene-nptx1l	1	nptx1l	1	gene-nptx1l	0
BP	GO:0071333	cellular response to glucose stimulus	1/646	10/11595	0.436443417646445	0.932483799624146	gene-nptx1l	1	nptx1l	1	gene-nptx1l	0
BP	GO:0071364	cellular response to epidermal growth factor stimulus	1/646	10/11595	0.436443417646445	0.932483799624146	gene-snai2	1	snai2	0	-	1
BP	GO:0071621	granulocyte chemotaxis	1/646	10/11595	0.436443417646445	0.932483799624146	gene-LOC122873767	1	LOC122873767	1	gene-LOC122873767	0
BP	GO:0072080	nephron tubule development	1/646	10/11595	0.436443417646445	0.932483799624146	gene-LOC122888062	1	LOC122888062	1	gene-LOC122888062	0
BP	GO:0097720	calcineurin-mediated signaling	1/646	10/11595	0.436443417646445	0.932483799624146	gene-rcan1b	1	rcan1b	1	gene-rcan1b	0
BP	GO:0098727	maintenance of cell number	1/646	10/11595	0.436443417646445	0.932483799624146	gene-LOC122877917	1	LOC122877917	1	gene-LOC122877917	0
BP	GO:0098732	macromolecule deacylation	1/646	10/11595	0.436443417646445	0.932483799624146	gene-znf703	1	znf703	0	-	1
BP	GO:1900076	regulation of cellular response to insulin stimulus	1/646	10/11595	0.436443417646445	0.932483799624146	gene-pid1	1	pid1	0	-	1
BP	GO:1901985	positive regulation of protein acetylation	1/646	10/11595	0.436443417646445	0.932483799624146	gene-snai2	1	snai2	0	-	1
BP	GO:1990266	neutrophil migration	1/646	10/11595	0.436443417646445	0.932483799624146	gene-LOC122873767	1	LOC122873767	1	gene-LOC122873767	0
BP	GO:2000758	positive regulation of peptidyl-lysine acetylation	1/646	10/11595	0.436443417646445	0.932483799624146	gene-snai2	1	snai2	0	-	1
BP	GO:2001243	negative regulation of intrinsic apoptotic signaling pathway	1/646	10/11595	0.436443417646445	0.932483799624146	gene-snai2	1	snai2	0	-	1
BP	GO:0007368	determination of left/right symmetry	6/646	95/11595	0.436883921558662	0.932483799624146	gene-skib/gene-znf703/gene-fzd2/gene-cacna1c/gene-rpgrb/gene-LOC122871826	6	cacna1c/fzd2/LOC122871826/rpgrb/skib/znf703	0	-	6
BP	GO:0045786	negative regulation of cell cycle	6/646	95/11595	0.436883921558662	0.932483799624146	gene-brinp3a.2/gene-LOC122877917/gene-LOC122887176/gene-id2a/gene-LOC122865952/gene-nupr1b	6	brinp3a.2/id2a/LOC122865952/LOC122877917/LOC122887176/nupr1b	2	gene-LOC122877917/gene-nupr1b	4
BP	GO:0043254	regulation of protein-containing complex assembly	10/646	165/11595	0.438804125162161	0.932483799624146	gene-tppp3/gene-pmepa1/gene-LOC122885147/gene-LOC122879509/gene-tmod4/gene-fmn2a/gene-LOC122861414/gene-fmn1/gene-baiap2l1a/gene-LOC122869242	10	baiap2l1a/fmn1/fmn2a/LOC122861414/LOC122869242/LOC122879509/LOC122885147/pmepa1/tmod4/tppp3	7	gene-baiap2l1a/gene-fmn1/gene-LOC122861414/gene-LOC122869242/gene-LOC122879509/gene-LOC122885147/gene-tmod4	3
BP	GO:0032984	protein-containing complex disassembly	5/646	78/11595	0.440453868180703	0.932483799624146	gene-swap70a/gene-LOC122879509/gene-tmod4/gene-LOC122886528/gene-LOC122871423	5	LOC122871423/LOC122879509/LOC122886528/swap70a/tmod4	4	gene-LOC122871423/gene-LOC122879509/gene-LOC122886528/gene-tmod4	1
BP	GO:0034097	response to cytokine	5/646	78/11595	0.440453868180703	0.932483799624146	gene-cxcl12b/gene-LOC122878212/gene-LOC122877917/gene-csf1ra/gene-LOC122868174	5	csf1ra/cxcl12b/LOC122868174/LOC122877917/LOC122878212	4	gene-csf1ra/gene-LOC122868174/gene-LOC122877917/gene-LOC122878212	1
BP	GO:0009628	response to abiotic stimulus	11/646	183/11595	0.442234380341598	0.932483799624146	gene-grk1a/gene-ddit3/gene-LOC122887291/gene-metrnlb/gene-LOC122878127/gene-gpr4/gene-nyx/gene-snai2/gene-eif2ak3/gene-tnca/gene-LOC122868714	11	ddit3/eif2ak3/gpr4/grk1a/LOC122868714/LOC122878127/LOC122887291/metrnlb/nyx/snai2/tnca	7	gene-ddit3/gene-eif2ak3/gene-grk1a/gene-LOC122878127/gene-LOC122887291/gene-metrnlb/gene-nyx	4
BP	GO:0014066	regulation of phosphatidylinositol 3-kinase signaling	4/646	61/11595	0.444004127152823	0.932483799624146	gene-LOC122877917/gene-LOC122884209/gene-LOC122869242/gene-LOC122871413	4	LOC122869242/LOC122871413/LOC122877917/LOC122884209	3	gene-LOC122869242/gene-LOC122871413/gene-LOC122877917	1
BP	GO:0031334	positive regulation of protein-containing complex assembly	4/646	61/11595	0.444004127152823	0.932483799624146	gene-tppp3/gene-fmn2a/gene-LOC122861414/gene-fmn1	4	fmn1/fmn2a/LOC122861414/tppp3	2	gene-fmn1/gene-LOC122861414	2
BP	GO:0051495	positive regulation of cytoskeleton organization	4/646	61/11595	0.444004127152823	0.932483799624146	gene-swap70a/gene-fmn2a/gene-LOC122861414/gene-fmn1	4	fmn1/fmn2a/LOC122861414/swap70a	2	gene-fmn1/gene-LOC122861414	2
BP	GO:0009116	nucleoside metabolic process	3/646	44/11595	0.447196240868985	0.932483799624146	gene-pnp6/gene-macrod1/gene-nme5	3	macrod1/nme5/pnp6	3	gene-macrod1/gene-nme5/gene-pnp6	0
BP	GO:0010035	response to inorganic substance	3/646	44/11595	0.447196240868985	0.932483799624146	gene-nptx1l/gene-LOC122877917/gene-cbx8a	3	cbx8a/LOC122877917/nptx1l	2	gene-LOC122877917/gene-nptx1l	1
BP	GO:0022407	regulation of cell-cell adhesion	3/646	44/11595	0.447196240868985	0.932483799624146	gene-swap70a/gene-LOC122878127/gene-LOC122877917	3	LOC122877917/LOC122878127/swap70a	2	gene-LOC122877917/gene-LOC122878127	1
BP	GO:0030837	negative regulation of actin filament polymerization	3/646	44/11595	0.447196240868985	0.932483799624146	gene-LOC122885147/gene-LOC122879509/gene-tmod4	3	LOC122879509/LOC122885147/tmod4	3	gene-LOC122879509/gene-LOC122885147/gene-tmod4	0
BP	GO:0032272	negative regulation of protein polymerization	3/646	44/11595	0.447196240868985	0.932483799624146	gene-LOC122885147/gene-LOC122879509/gene-tmod4	3	LOC122879509/LOC122885147/tmod4	3	gene-LOC122879509/gene-LOC122885147/gene-tmod4	0
BP	GO:0032835	glomerulus development	2/646	27/11595	0.448603585530787	0.932483799624146	gene-LOC122870658/gene-LOC122865952	2	LOC122865952/LOC122870658	1	gene-LOC122870658	1
BP	GO:0048608	reproductive structure development	2/646	27/11595	0.448603585530787	0.932483799624146	gene-tnca/gene-nupr1b	2	nupr1b/tnca	1	gene-nupr1b	1
BP	GO:0061458	reproductive system development	2/646	27/11595	0.448603585530787	0.932483799624146	gene-tnca/gene-nupr1b	2	nupr1b/tnca	1	gene-nupr1b	1
BP	GO:0085029	extracellular matrix assembly	2/646	27/11595	0.448603585530787	0.932483799624146	gene-lamb3/gene-phldb2b	2	lamb3/phldb2b	1	gene-lamb3	1
BP	GO:1901214	regulation of neuron death	2/646	27/11595	0.448603585530787	0.932483799624146	gene-ndnf/gene-nupr1b	2	ndnf/nupr1b	1	gene-nupr1b	1
BP	GO:0042327	positive regulation of phosphorylation	5/646	79/11595	0.451501727923883	0.932483799624146	gene-dok7b/gene-LOC122878127/gene-LOC122886518/gene-nupr1b/gene-LOC122871413	5	dok7b/LOC122871413/LOC122878127/LOC122886518/nupr1b	4	gene-LOC122871413/gene-LOC122878127/gene-LOC122886518/gene-nupr1b	1
BP	GO:0046578	regulation of Ras protein signal transduction	4/646	62/11595	0.456514624023157	0.932483799624146	gene-si:ch211-286b5.4/gene-arfgef3/gene-LOC122865952/gene-iqsec3a	4	arfgef3/iqsec3a/LOC122865952/si:ch211-286b5.4	3	gene-arfgef3/gene-iqsec3a/gene-si:ch211-286b5.4	1
BP	GO:0051640	organelle localization	6/646	97/11595	0.456843764144189	0.932483799624146	gene-terb1/gene-LOC122877630/gene-esyt1a/gene-LOC122885551/gene-LOC122886528/gene-sapcd1	6	esyt1a/LOC122877630/LOC122885551/LOC122886528/sapcd1/terb1	5	gene-LOC122877630/gene-LOC122885551/gene-LOC122886528/gene-sapcd1/gene-terb1	1
BP	GO:0001701	in utero embryonic development	3/646	45/11595	0.461954862876089	0.932483799624146	gene-LOC122877917/gene-rundc1/gene-mrtfbb	3	LOC122877917/mrtfbb/rundc1	2	gene-LOC122877917/gene-rundc1	1
BP	GO:1901657	glycosyl compound metabolic process	3/646	45/11595	0.461954862876089	0.932483799624146	gene-pnp6/gene-macrod1/gene-nme5	3	macrod1/nme5/pnp6	3	gene-macrod1/gene-nme5/gene-pnp6	0
BP	GO:1903706	regulation of hemopoiesis	3/646	45/11595	0.461954862876089	0.932483799624146	gene-LOC122878127/gene-zbtb46/gene-lrrc17	3	LOC122878127/lrrc17/zbtb46	1	gene-LOC122878127	2
BP	GO:0007346	regulation of mitotic cell cycle	5/646	80/11595	0.462491067395759	0.932483799624146	gene-brinp3a.2/gene-LOC122877917/gene-LOC122887176/gene-id2a/gene-LOC122865952	5	brinp3a.2/id2a/LOC122865952/LOC122877917/LOC122887176	1	gene-LOC122877917	4
BP	GO:0031327	negative regulation of cellular biosynthetic process	14/646	239/11595	0.462883802132132	0.932483799624146	gene-znf703/gene-LOC122877917/gene-znf296/gene-zgc:162144/gene-id4/gene-snai2/gene-id2a/gene-jazf1a/gene-LOC122865952/gene-cbx4/gene-cbx8a/gene-zfta/gene-bcl6b/gene-caprin2	14	bcl6b/caprin2/cbx4/cbx8a/id2a/id4/jazf1a/LOC122865952/LOC122877917/snai2/zfta/zgc:162144/znf296/znf703	4	gene-bcl6b/gene-caprin2/gene-LOC122877917/gene-zgc:162144	10
BP	GO:0050790	regulation of catalytic activity	24/646	417/11595	0.464929103580922	0.932483799624146	gene-tbc1d9/gene-dok7b/gene-ppp1r27b/gene-si:dkey-91m11.5/gene-arhgap25/gene-adgrv1/gene-sgsm1a/gene-LOC122878127/gene-LOC122877917/gene-rap1gap2a/gene-zgc:162144/gene-zgc:92242/gene-LOC122881737/gene-rasgrp3/gene-asap1a/gene-zmp:0000001168/gene-LOC122864981/gene-arhgap24/gene-arhgap27/gene-si:dkey-191m6.4/gene-rundc1/gene-sgsm3/gene-LOC122869489/gene-tbc1d30	24	adgrv1/arhgap24/arhgap25/arhgap27/asap1a/dok7b/LOC122864981/LOC122869489/LOC122877917/LOC122878127/LOC122881737/ppp1r27b/rap1gap2a/rasgrp3/rundc1/sgsm1a/sgsm3/si:dkey-191m6.4/si:dkey-91m11.5/tbc1d30/tbc1d9/zgc:162144/zgc:92242/zmp:0000001168	17	gene-adgrv1/gene-arhgap25/gene-asap1a/gene-LOC122864981/gene-LOC122877917/gene-LOC122878127/gene-ppp1r27b/gene-rap1gap2a/gene-rasgrp3/gene-rundc1/gene-sgsm1a/gene-sgsm3/gene-si:dkey-191m6.4/gene-tbc1d30/gene-zgc:162144/gene-zgc:92242/gene-zmp:0000001168	7
BP	GO:0006631	fatty acid metabolic process	6/646	98/11595	0.46676161519339	0.932483799624146	gene-scdb/gene-acaca/gene-lpin1b/gene-LOC122866220/gene-scd/gene-fasn	6	acaca/fasn/LOC122866220/lpin1b/scd/scdb	6	gene-acaca/gene-fasn/gene-LOC122866220/gene-lpin1b/gene-scd/gene-scdb	0
BP	GO:0072522	purine-containing compound biosynthetic process	6/646	98/11595	0.46676161519339	0.932483799624146	gene-ampd3a/gene-zgc:162144/gene-nme5/gene-LOC122882904/gene-acaca/gene-LOC122869764	6	acaca/ampd3a/LOC122869764/LOC122882904/nme5/zgc:162144	4	gene-acaca/gene-LOC122869764/gene-nme5/gene-zgc:162144	2
BP	GO:0001654	eye development	9/646	151/11595	0.466823892898238	0.932483799624146	gene-znf703/gene-LOC122877917/gene-zgc:162144/gene-crybb1l1/gene-sox4b/gene-cryba2b/gene-id2a/gene-slc7a14a/gene-rpgrb	9	cryba2b/crybb1l1/id2a/LOC122877917/rpgrb/slc7a14a/sox4b/zgc:162144/znf703	5	gene-cryba2b/gene-crybb1l1/gene-LOC122877917/gene-slc7a14a/gene-zgc:162144	4
BP	GO:0150063	visual system development	9/646	151/11595	0.466823892898238	0.932483799624146	gene-znf703/gene-LOC122877917/gene-zgc:162144/gene-crybb1l1/gene-sox4b/gene-cryba2b/gene-id2a/gene-slc7a14a/gene-rpgrb	9	cryba2b/crybb1l1/id2a/LOC122877917/rpgrb/slc7a14a/sox4b/zgc:162144/znf703	5	gene-cryba2b/gene-crybb1l1/gene-LOC122877917/gene-slc7a14a/gene-zgc:162144	4
BP	GO:0035051	cardiocyte differentiation	2/646	28/11595	0.467508680643108	0.932483799624146	gene-tmem88a/gene-pdzph1	2	pdzph1/tmem88a	1	gene-pdzph1	1
BP	GO:0035107	appendage morphogenesis	2/646	28/11595	0.467508680643108	0.932483799624146	gene-sp8a/gene-itga3b	2	itga3b/sp8a	1	gene-itga3b	1
BP	GO:0042074	cell migration involved in gastrulation	2/646	28/11595	0.467508680643108	0.932483799624146	gene-snai1a/gene-gpc4	2	gpc4/snai1a	0	-	2
BP	GO:0046148	pigment biosynthetic process	2/646	28/11595	0.467508680643108	0.932483799624146	gene-alas1/gene-LOC122888177	2	alas1/LOC122888177	1	gene-alas1	1
BP	GO:0051222	positive regulation of protein transport	2/646	28/11595	0.467508680643108	0.932483799624146	gene-gck/gene-LOC122878127	2	gck/LOC122878127	2	gene-gck/gene-LOC122878127	0
BP	GO:2000113	negative regulation of cellular macromolecule biosynthetic process	13/646	222/11595	0.467634166311631	0.932483799624146	gene-znf703/gene-LOC122877917/gene-znf296/gene-id4/gene-snai2/gene-id2a/gene-jazf1a/gene-LOC122865952/gene-cbx4/gene-cbx8a/gene-zfta/gene-bcl6b/gene-caprin2	13	bcl6b/caprin2/cbx4/cbx8a/id2a/id4/jazf1a/LOC122865952/LOC122877917/snai2/zfta/znf296/znf703	3	gene-bcl6b/gene-caprin2/gene-LOC122877917	10
BP	GO:0006555	methionine metabolic process	1/646	11/11595	0.467868325043976	0.932483799624146	gene-LOC122876938	1	LOC122876938	1	gene-LOC122876938	0
BP	GO:0006858	extracellular transport	1/646	11/11595	0.467868325043976	0.932483799624146	gene-rpgrb	1	rpgrb	0	-	1
BP	GO:0007204	positive regulation of cytosolic calcium ion concentration	1/646	11/11595	0.467868325043976	0.932483799624146	gene-swap70a	1	swap70a	0	-	1
BP	GO:0009129	pyrimidine nucleoside monophosphate metabolic process	1/646	11/11595	0.467868325043976	0.932483799624146	gene-dut	1	dut	0	-	1
BP	GO:0009130	pyrimidine nucleoside monophosphate biosynthetic process	1/646	11/11595	0.467868325043976	0.932483799624146	gene-dut	1	dut	0	-	1
BP	GO:0009395	phospholipid catabolic process	1/646	11/11595	0.467868325043976	0.932483799624146	gene-smpdl3b	1	smpdl3b	0	-	1
BP	GO:0010677	negative regulation of cellular carbohydrate metabolic process	1/646	11/11595	0.467868325043976	0.932483799624146	gene-nupr1b	1	nupr1b	1	gene-nupr1b	0
BP	GO:0010717	regulation of epithelial to mesenchymal transition	1/646	11/11595	0.467868325043976	0.932483799624146	gene-phldb2b	1	phldb2b	0	-	1
BP	GO:0010769	regulation of cell morphogenesis involved in differentiation	1/646	11/11595	0.467868325043976	0.932483799624146	gene-LOC122874995	1	LOC122874995	1	gene-LOC122874995	0
BP	GO:0014896	muscle hypertrophy	1/646	11/11595	0.467868325043976	0.932483799624146	gene-cacna1c	1	cacna1c	0	-	1
BP	GO:0015012	heparan sulfate proteoglycan biosynthetic process	1/646	11/11595	0.467868325043976	0.932483799624146	gene-LOC122863823	1	LOC122863823	0	-	1
BP	GO:0018057	peptidyl-lysine oxidation	1/646	11/11595	0.467868325043976	0.932483799624146	gene-loxl3b	1	loxl3b	0	-	1
BP	GO:0018158	protein oxidation	1/646	11/11595	0.467868325043976	0.932483799624146	gene-loxl3b	1	loxl3b	0	-	1
BP	GO:0018209	peptidyl-serine modification	1/646	11/11595	0.467868325043976	0.932483799624146	gene-ndnf	1	ndnf	0	-	1
BP	GO:0021761	limbic system development	1/646	11/11595	0.467868325043976	0.932483799624146	gene-ndnf	1	ndnf	0	-	1
BP	GO:0030307	positive regulation of cell growth	1/646	11/11595	0.467868325043976	0.932483799624146	gene-znf296	1	znf296	0	-	1
BP	GO:0031638	zymogen activation	1/646	11/11595	0.467868325043976	0.932483799624146	gene-plat	1	plat	1	gene-plat	0
BP	GO:0032261	purine nucleotide salvage	1/646	11/11595	0.467868325043976	0.932483799624146	gene-ampd3a	1	ampd3a	0	-	1
BP	GO:0032401	establishment of melanosome localization	1/646	11/11595	0.467868325043976	0.932483799624146	gene-LOC122885551	1	LOC122885551	1	gene-LOC122885551	0
BP	GO:0043627	response to estrogen	1/646	11/11595	0.467868325043976	0.932483799624146	gene-wbp2	1	wbp2	1	gene-wbp2	0
BP	GO:0045214	sarcomere organization	1/646	11/11595	0.467868325043976	0.932483799624146	gene-lrrc39	1	lrrc39	1	gene-lrrc39	0
BP	GO:0046328	regulation of JNK cascade	1/646	11/11595	0.467868325043976	0.932483799624146	gene-klhl43	1	klhl43	1	gene-klhl43	0
BP	GO:0048384	retinoic acid receptor signaling pathway	1/646	11/11595	0.467868325043976	0.932483799624146	gene-LOC122864108	1	LOC122864108	1	gene-LOC122864108	0
BP	GO:0051101	regulation of DNA binding	1/646	11/11595	0.467868325043976	0.932483799624146	gene-LOC122877917	1	LOC122877917	1	gene-LOC122877917	0
BP	GO:0051480	regulation of cytosolic calcium ion concentration	1/646	11/11595	0.467868325043976	0.932483799624146	gene-swap70a	1	swap70a	0	-	1
BP	GO:0051905	establishment of pigment granule localization	1/646	11/11595	0.467868325043976	0.932483799624146	gene-LOC122885551	1	LOC122885551	1	gene-LOC122885551	0
BP	GO:0062237	protein localization to postsynapse	1/646	11/11595	0.467868325043976	0.932483799624146	gene-nptx1l	1	nptx1l	1	gene-nptx1l	0
BP	GO:0072384	organelle transport along microtubule	1/646	11/11595	0.467868325043976	0.932483799624146	gene-LOC122886528	1	LOC122886528	1	gene-LOC122886528	0
BP	GO:0097352	autophagosome maturation	1/646	11/11595	0.467868325043976	0.932483799624146	gene-LOC122886528	1	LOC122886528	1	gene-LOC122886528	0
BP	GO:0097530	granulocyte migration	1/646	11/11595	0.467868325043976	0.932483799624146	gene-LOC122873767	1	LOC122873767	1	gene-LOC122873767	0
BP	GO:0099072	regulation of postsynaptic membrane neurotransmitter receptor levels	1/646	11/11595	0.467868325043976	0.932483799624146	gene-nptx1l	1	nptx1l	1	gene-nptx1l	0
BP	GO:1901068	guanosine-containing compound metabolic process	1/646	11/11595	0.467868325043976	0.932483799624146	gene-nme5	1	nme5	1	gene-nme5	0
BP	GO:1901800	positive regulation of proteasomal protein catabolic process	1/646	11/11595	0.467868325043976	0.932483799624146	gene-nupr1b	1	nupr1b	1	gene-nupr1b	0
BP	GO:1903539	protein localization to postsynaptic membrane	1/646	11/11595	0.467868325043976	0.932483799624146	gene-nptx1l	1	nptx1l	1	gene-nptx1l	0
BP	GO:1903825	organic acid transmembrane transport	1/646	11/11595	0.467868325043976	0.932483799624146	gene-LOC122871427	1	LOC122871427	1	gene-LOC122871427	0
BP	GO:1905039	carboxylic acid transmembrane transport	1/646	11/11595	0.467868325043976	0.932483799624146	gene-LOC122871427	1	LOC122871427	1	gene-LOC122871427	0
BP	GO:0051960	regulation of nervous system development	3/646	46/11595	0.476540090018779	0.933857268286506	gene-LOC122878127/gene-znf296/gene-spartb	3	LOC122878127/spartb/znf296	2	gene-LOC122878127/gene-spartb	1
BP	GO:0055002	striated muscle cell development	3/646	46/11595	0.476540090018779	0.933857268286506	gene-lrrc39/gene-gpc4/gene-tmod4	3	gpc4/lrrc39/tmod4	2	gene-lrrc39/gene-tmod4	1
BP	GO:0099111	microtubule-based transport	3/646	46/11595	0.476540090018779	0.933857268286506	gene-si:ch211-286b5.4/gene-LOC122886528/gene-rpgrb	3	LOC122886528/rpgrb/si:ch211-286b5.4	2	gene-LOC122886528/gene-si:ch211-286b5.4	1
BP	GO:0032409	regulation of transporter activity	2/646	29/11595	0.48602242795597	0.933857268286506	gene-cttnbp2nla/gene-LOC122886797	2	cttnbp2nla/LOC122886797	1	gene-LOC122886797	1
BP	GO:0033333	fin development	2/646	29/11595	0.48602242795597	0.933857268286506	gene-sp8a/gene-itga3b	2	itga3b/sp8a	1	gene-itga3b	1
BP	GO:0010558	negative regulation of macromolecule biosynthetic process	13/646	225/11595	0.487326207818116	0.933857268286506	gene-znf703/gene-LOC122877917/gene-znf296/gene-id4/gene-snai2/gene-id2a/gene-jazf1a/gene-LOC122865952/gene-cbx4/gene-cbx8a/gene-zfta/gene-bcl6b/gene-caprin2	13	bcl6b/caprin2/cbx4/cbx8a/id2a/id4/jazf1a/LOC122865952/LOC122877917/snai2/zfta/znf296/znf703	3	gene-bcl6b/gene-caprin2/gene-LOC122877917	10
BP	GO:0042981	regulation of apoptotic process	15/646	261/11595	0.488955236000342	0.933857268286506	gene-LOC122878127/gene-LOC122877908/gene-ndnf/gene-boka/gene-LOC122877917/gene-tnfaip8l2b/gene-LOC122881737/gene-snai2/gene-angptl4/gene-ripk2/gene-trim69/gene-nupr1b/gene-LOC122868820/gene-zmp:0000000896/gene-phlda1	15	angptl4/boka/LOC122868820/LOC122877908/LOC122877917/LOC122878127/LOC122881737/ndnf/nupr1b/phlda1/ripk2/snai2/tnfaip8l2b/trim69/zmp:0000000896	6	gene-LOC122877908/gene-LOC122877917/gene-LOC122878127/gene-nupr1b/gene-ripk2/gene-trim69	9
BP	GO:0031667	response to nutrient levels	3/646	47/11595	0.490939326497411	0.933857268286506	gene-snai2/gene-tnca/gene-LOC122865952	3	LOC122865952/snai2/tnca	0	-	3
BP	GO:1901880	negative regulation of protein depolymerization	3/646	47/11595	0.490939326497411	0.933857268286506	gene-swap70a/gene-LOC122879509/gene-tmod4	3	LOC122879509/swap70a/tmod4	2	gene-LOC122879509/gene-tmod4	1
BP	GO:0031401	positive regulation of protein modification process	7/646	119/11595	0.497113027553407	0.933857268286506	gene-dok7b/gene-znf703/gene-LOC122878127/gene-snai2/gene-LOC122886518/gene-nupr1b/gene-LOC122871413	7	dok7b/LOC122871413/LOC122878127/LOC122886518/nupr1b/snai2/znf703	4	gene-LOC122871413/gene-LOC122878127/gene-LOC122886518/gene-nupr1b	3
BP	GO:0002793	positive regulation of peptide secretion	1/646	12/11595	0.49754348578479	0.933857268286506	gene-gck	1	gck	1	gene-gck	0
BP	GO:0006024	glycosaminoglycan biosynthetic process	1/646	12/11595	0.49754348578479	0.933857268286506	gene-has1	1	has1	0	-	1
BP	GO:0007205	protein kinase C-activating G protein-coupled receptor signaling pathway	1/646	12/11595	0.49754348578479	0.933857268286506	gene-si:dkey-172j4.3	1	si:dkey-172j4.3	1	gene-si:dkey-172j4.3	0
BP	GO:0007634	optokinetic behavior	1/646	12/11595	0.49754348578479	0.933857268286506	gene-nyx	1	nyx	1	gene-nyx	0
BP	GO:0008585	female gonad development	1/646	12/11595	0.49754348578479	0.933857268286506	gene-nupr1b	1	nupr1b	1	gene-nupr1b	0
BP	GO:0009226	nucleotide-sugar biosynthetic process	1/646	12/11595	0.49754348578479	0.933857268286506	gene-gfpt2	1	gfpt2	1	gene-gfpt2	0
BP	GO:0009411	response to UV	1/646	12/11595	0.49754348578479	0.933857268286506	gene-LOC122878127	1	LOC122878127	1	gene-LOC122878127	0
BP	GO:0009791	post-embryonic development	1/646	12/11595	0.49754348578479	0.933857268286506	gene-LOC122877917	1	LOC122877917	1	gene-LOC122877917	0
BP	GO:0010950	positive regulation of endopeptidase activity	1/646	12/11595	0.49754348578479	0.933857268286506	gene-LOC122881737	1	LOC122881737	0	-	1
BP	GO:0010952	positive regulation of peptidase activity	1/646	12/11595	0.49754348578479	0.933857268286506	gene-LOC122881737	1	LOC122881737	0	-	1
BP	GO:0022406	membrane docking	1/646	12/11595	0.49754348578479	0.933857268286506	gene-esyt1a	1	esyt1a	0	-	1
BP	GO:0030212	hyaluronan metabolic process	1/646	12/11595	0.49754348578479	0.933857268286506	gene-has1	1	has1	0	-	1
BP	GO:0030968	endoplasmic reticulum unfolded protein response	1/646	12/11595	0.49754348578479	0.933857268286506	gene-LOC122878127	1	LOC122878127	1	gene-LOC122878127	0
BP	GO:0031060	regulation of histone methylation	1/646	12/11595	0.49754348578479	0.933857268286506	gene-gfi1aa	1	gfi1aa	1	gene-gfi1aa	0
BP	GO:0031644	regulation of nervous system process	1/646	12/11595	0.49754348578479	0.933857268286506	gene-nptx1l	1	nptx1l	1	gene-nptx1l	0
BP	GO:0032400	melanosome localization	1/646	12/11595	0.49754348578479	0.933857268286506	gene-LOC122885551	1	LOC122885551	1	gene-LOC122885551	0
BP	GO:0035138	pectoral fin morphogenesis	1/646	12/11595	0.49754348578479	0.933857268286506	gene-sp8a	1	sp8a	0	-	1
BP	GO:0043500	muscle adaptation	1/646	12/11595	0.49754348578479	0.933857268286506	gene-LOC122877917	1	LOC122877917	1	gene-LOC122877917	0
BP	GO:0043524	negative regulation of neuron apoptotic process	1/646	12/11595	0.49754348578479	0.933857268286506	gene-ndnf	1	ndnf	0	-	1
BP	GO:0045143	homologous chromosome segregation	1/646	12/11595	0.49754348578479	0.933857268286506	gene-terb1	1	terb1	1	gene-terb1	0
BP	GO:0045739	positive regulation of DNA repair	1/646	12/11595	0.49754348578479	0.933857268286506	gene-cbx8a	1	cbx8a	0	-	1
BP	GO:0045912	negative regulation of carbohydrate metabolic process	1/646	12/11595	0.49754348578479	0.933857268286506	gene-nupr1b	1	nupr1b	1	gene-nupr1b	0
BP	GO:0048639	positive regulation of developmental growth	1/646	12/11595	0.49754348578479	0.933857268286506	gene-znf296	1	znf296	0	-	1
BP	GO:0050714	positive regulation of protein secretion	1/646	12/11595	0.49754348578479	0.933857268286506	gene-gck	1	gck	1	gene-gck	0
BP	GO:0050730	regulation of peptidyl-tyrosine phosphorylation	1/646	12/11595	0.49754348578479	0.933857268286506	gene-dok7b	1	dok7b	0	-	1
BP	GO:0050796	regulation of insulin secretion	1/646	12/11595	0.49754348578479	0.933857268286506	gene-gck	1	gck	1	gene-gck	0
BP	GO:0051875	pigment granule localization	1/646	12/11595	0.49754348578479	0.933857268286506	gene-LOC122885551	1	LOC122885551	1	gene-LOC122885551	0
BP	GO:0051883	killing of cells in other organism involved in symbiotic interaction	1/646	12/11595	0.49754348578479	0.933857268286506	gene-tusc2a	1	tusc2a	1	gene-tusc2a	0
BP	GO:0090276	regulation of peptide hormone secretion	1/646	12/11595	0.49754348578479	0.933857268286506	gene-gck	1	gck	1	gene-gck	0
BP	GO:0140056	organelle localization by membrane tethering	1/646	12/11595	0.49754348578479	0.933857268286506	gene-esyt1a	1	esyt1a	0	-	1
BP	GO:1901019	regulation of calcium ion transmembrane transporter activity	1/646	12/11595	0.49754348578479	0.933857268286506	gene-LOC122886797	1	LOC122886797	1	gene-LOC122886797	0
BP	GO:1901796	regulation of signal transduction by p53 class mediator	1/646	12/11595	0.49754348578479	0.933857268286506	gene-snai2	1	snai2	0	-	1
BP	GO:1903052	positive regulation of proteolysis involved in cellular protein catabolic process	1/646	12/11595	0.49754348578479	0.933857268286506	gene-nupr1b	1	nupr1b	1	gene-nupr1b	0
BP	GO:1903053	regulation of extracellular matrix organization	1/646	12/11595	0.49754348578479	0.933857268286506	gene-phldb2b	1	phldb2b	0	-	1
BP	GO:2001021	negative regulation of response to DNA damage stimulus	1/646	12/11595	0.49754348578479	0.933857268286506	gene-snai2	1	snai2	0	-	1
BP	GO:2001056	positive regulation of cysteine-type endopeptidase activity	1/646	12/11595	0.49754348578479	0.933857268286506	gene-LOC122881737	1	LOC122881737	0	-	1
BP	GO:0001933	negative regulation of protein phosphorylation	2/646	30/11595	0.504129710682377	0.933857268286506	gene-LOC122886518/gene-klhl43	2	klhl43/LOC122886518	2	gene-klhl43/gene-LOC122886518	0
BP	GO:0006814	sodium ion transport	2/646	30/11595	0.504129710682377	0.933857268286506	gene-LOC122878896/gene-slc13a4	2	LOC122878896/slc13a4	2	gene-LOC122878896/gene-slc13a4	0
BP	GO:0009142	nucleoside triphosphate biosynthetic process	2/646	30/11595	0.504129710682377	0.933857268286506	gene-nme5/gene-cmpk2	2	cmpk2/nme5	2	gene-cmpk2/gene-nme5	0
BP	GO:0010720	positive regulation of cell development	2/646	30/11595	0.504129710682377	0.933857268286506	gene-LOC122874995/gene-znf296	2	LOC122874995/znf296	1	gene-LOC122874995	1
BP	GO:0044843	cell cycle G1/S phase transition	2/646	30/11595	0.504129710682377	0.933857268286506	gene-LOC122877917/gene-LOC122865952	2	LOC122865952/LOC122877917	1	gene-LOC122877917	1
BP	GO:0055072	iron ion homeostasis	2/646	30/11595	0.504129710682377	0.933857268286506	gene-LOC122881776/gene-LOC122868396	2	LOC122868396/LOC122881776	2	gene-LOC122868396/gene-LOC122881776	0
BP	GO:1904951	positive regulation of establishment of protein localization	2/646	30/11595	0.504129710682377	0.933857268286506	gene-gck/gene-LOC122878127	2	gck/LOC122878127	2	gene-gck/gene-LOC122878127	0
BP	GO:2001233	regulation of apoptotic signaling pathway	2/646	30/11595	0.504129710682377	0.933857268286506	gene-snai2/gene-nupr1b	2	nupr1b/snai2	1	gene-nupr1b	1
BP	GO:0009991	response to extracellular stimulus	3/646	48/11595	0.505141136659008	0.933857268286506	gene-snai2/gene-tnca/gene-LOC122865952	3	LOC122865952/snai2/tnca	0	-	3
BP	GO:0030838	positive regulation of actin filament polymerization	3/646	48/11595	0.505141136659008	0.933857268286506	gene-fmn2a/gene-LOC122861414/gene-fmn1	3	fmn1/fmn2a/LOC122861414	2	gene-fmn1/gene-LOC122861414	1
BP	GO:0031016	pancreas development	3/646	48/11595	0.505141136659008	0.933857268286506	gene-lnx2b/gene-sox4b/gene-fzd2	3	fzd2/lnx2b/sox4b	0	-	3
BP	GO:0043624	cellular protein complex disassembly	4/646	66/11595	0.505509780590383	0.933857268286506	gene-swap70a/gene-LOC122879509/gene-tmod4/gene-LOC122871423	4	LOC122871423/LOC122879509/swap70a/tmod4	3	gene-LOC122871423/gene-LOC122879509/gene-tmod4	1
BP	GO:0051090	regulation of DNA-binding transcription factor activity	5/646	84/11595	0.505727349881501	0.933857268286506	gene-LOC122877917/gene-nupr1b/gene-zmp:0000000896/gene-LOC122869242/gene-LOC122872132	5	LOC122869242/LOC122872132/LOC122877917/nupr1b/zmp:0000000896	3	gene-LOC122869242/gene-LOC122877917/gene-nupr1b	2
BP	GO:0009890	negative regulation of biosynthetic process	14/646	246/11595	0.507004569959723	0.933857268286506	gene-znf703/gene-LOC122877917/gene-znf296/gene-zgc:162144/gene-id4/gene-snai2/gene-id2a/gene-jazf1a/gene-LOC122865952/gene-cbx4/gene-cbx8a/gene-zfta/gene-bcl6b/gene-caprin2	14	bcl6b/caprin2/cbx4/cbx8a/id2a/id4/jazf1a/LOC122865952/LOC122877917/snai2/zfta/zgc:162144/znf296/znf703	4	gene-bcl6b/gene-caprin2/gene-LOC122877917/gene-zgc:162144	10
BP	GO:0043067	regulation of programmed cell death	15/646	264/11595	0.507135146299418	0.933857268286506	gene-LOC122878127/gene-LOC122877908/gene-ndnf/gene-boka/gene-LOC122877917/gene-tnfaip8l2b/gene-LOC122881737/gene-snai2/gene-angptl4/gene-ripk2/gene-trim69/gene-nupr1b/gene-LOC122868820/gene-zmp:0000000896/gene-phlda1	15	angptl4/boka/LOC122868820/LOC122877908/LOC122877917/LOC122878127/LOC122881737/ndnf/nupr1b/phlda1/ripk2/snai2/tnfaip8l2b/trim69/zmp:0000000896	6	gene-LOC122877908/gene-LOC122877917/gene-LOC122878127/gene-nupr1b/gene-ripk2/gene-trim69	9
BP	GO:0010562	positive regulation of phosphorus metabolic process	5/646	85/11595	0.516324925422891	0.933857268286506	gene-dok7b/gene-LOC122878127/gene-LOC122886518/gene-nupr1b/gene-LOC122871413	5	dok7b/LOC122871413/LOC122878127/LOC122886518/nupr1b	4	gene-LOC122871413/gene-LOC122878127/gene-LOC122886518/gene-nupr1b	1
BP	GO:0045937	positive regulation of phosphate metabolic process	5/646	85/11595	0.516324925422891	0.933857268286506	gene-dok7b/gene-LOC122878127/gene-LOC122886518/gene-nupr1b/gene-LOC122871413	5	dok7b/LOC122871413/LOC122878127/LOC122886518/nupr1b	4	gene-LOC122871413/gene-LOC122878127/gene-LOC122886518/gene-nupr1b	1
BP	GO:0050673	epithelial cell proliferation	5/646	85/11595	0.516324925422891	0.933857268286506	gene-vegfc/gene-amotl2a/gene-snai2/gene-nupr1b/gene-LOC122869242	5	amotl2a/LOC122869242/nupr1b/snai2/vegfc	2	gene-LOC122869242/gene-nupr1b	3
BP	GO:0006836	neurotransmitter transport	3/646	49/11595	0.519135198403069	0.933857268286506	gene-syt12/gene-LOC122882364/gene-LOC122871213	3	LOC122871213/LOC122882364/syt12	2	gene-LOC122882364/gene-syt12	1
BP	GO:0030098	lymphocyte differentiation	3/646	49/11595	0.519135198403069	0.933857268286506	gene-tusc2a/gene-LOC122878127/gene-znf296	3	LOC122878127/tusc2a/znf296	2	gene-LOC122878127/gene-tusc2a	1
BP	GO:0043242	negative regulation of protein-containing complex disassembly	3/646	49/11595	0.519135198403069	0.933857268286506	gene-swap70a/gene-LOC122879509/gene-tmod4	3	LOC122879509/swap70a/tmod4	2	gene-LOC122879509/gene-tmod4	1
BP	GO:0002224	toll-like receptor signaling pathway	2/646	31/11595	0.521818304506349	0.933857268286506	gene-tlr3/gene-ifi35	2	ifi35/tlr3	1	gene-ifi35	1
BP	GO:0045862	positive regulation of proteolysis	2/646	31/11595	0.521818304506349	0.933857268286506	gene-LOC122881737/gene-nupr1b	2	LOC122881737/nupr1b	1	gene-nupr1b	1
BP	GO:1902531	regulation of intracellular signal transduction	18/646	321/11595	0.523992889102882	0.933857268286506	gene-uacab/gene-si:ch211-286b5.4/gene-LOC122874995/gene-wdr54/gene-LOC122877917/gene-rap1gap2a/gene-LOC122884209/gene-arfgef3/gene-snai2/gene-zmp:0000001168/gene-klhl43/gene-LOC122865952/gene-dok6/gene-nupr1b/gene-ifi35/gene-LOC122869242/gene-iqsec3a/gene-LOC122871413	18	arfgef3/dok6/ifi35/iqsec3a/klhl43/LOC122865952/LOC122869242/LOC122871413/LOC122874995/LOC122877917/LOC122884209/nupr1b/rap1gap2a/si:ch211-286b5.4/snai2/uacab/wdr54/zmp:0000001168	13	gene-arfgef3/gene-dok6/gene-ifi35/gene-iqsec3a/gene-klhl43/gene-LOC122869242/gene-LOC122871413/gene-LOC122874995/gene-LOC122877917/gene-nupr1b/gene-rap1gap2a/gene-si:ch211-286b5.4/gene-zmp:0000001168	5
BP	GO:0009799	specification of symmetry	6/646	104/11595	0.52507585046257	0.933857268286506	gene-skib/gene-znf703/gene-fzd2/gene-cacna1c/gene-rpgrb/gene-LOC122871826	6	cacna1c/fzd2/LOC122871826/rpgrb/skib/znf703	0	-	6
BP	GO:0009855	determination of bilateral symmetry	6/646	104/11595	0.52507585046257	0.933857268286506	gene-skib/gene-znf703/gene-fzd2/gene-cacna1c/gene-rpgrb/gene-LOC122871826	6	cacna1c/fzd2/LOC122871826/rpgrb/skib/znf703	0	-	6
BP	GO:0032269	negative regulation of cellular protein metabolic process	6/646	104/11595	0.52507585046257	0.933857268286506	gene-swap70a/gene-LOC122878127/gene-LOC122877917/gene-LOC122886518/gene-klhl43/gene-caprin2	6	caprin2/klhl43/LOC122877917/LOC122878127/LOC122886518/swap70a	5	gene-caprin2/gene-klhl43/gene-LOC122877917/gene-LOC122878127/gene-LOC122886518	1
BP	GO:0051248	negative regulation of protein metabolic process	6/646	104/11595	0.52507585046257	0.933857268286506	gene-swap70a/gene-LOC122878127/gene-LOC122877917/gene-LOC122886518/gene-klhl43/gene-caprin2	6	caprin2/klhl43/LOC122877917/LOC122878127/LOC122886518/swap70a	5	gene-caprin2/gene-klhl43/gene-LOC122877917/gene-LOC122878127/gene-LOC122886518	1
BP	GO:0001649	osteoblast differentiation	1/646	13/11595	0.525566183547289	0.933857268286506	gene-snai2	1	snai2	0	-	1
BP	GO:0001946	lymphangiogenesis	1/646	13/11595	0.525566183547289	0.933857268286506	gene-vegfc	1	vegfc	0	-	1
BP	GO:0006023	aminoglycan biosynthetic process	1/646	13/11595	0.525566183547289	0.933857268286506	gene-has1	1	has1	0	-	1
BP	GO:0006188	IMP biosynthetic process	1/646	13/11595	0.525566183547289	0.933857268286506	gene-ampd3a	1	ampd3a	0	-	1
BP	GO:0006241	CTP biosynthetic process	1/646	13/11595	0.525566183547289	0.933857268286506	gene-nme5	1	nme5	1	gene-nme5	0
BP	GO:0006890	retrograde vesicle-mediated transport, Golgi to endoplasmic reticulum	1/646	13/11595	0.525566183547289	0.933857268286506	gene-LOC122879486	1	LOC122879486	1	gene-LOC122879486	0
BP	GO:0009208	pyrimidine ribonucleoside triphosphate metabolic process	1/646	13/11595	0.525566183547289	0.933857268286506	gene-nme5	1	nme5	1	gene-nme5	0
BP	GO:0009209	pyrimidine ribonucleoside triphosphate biosynthetic process	1/646	13/11595	0.525566183547289	0.933857268286506	gene-nme5	1	nme5	1	gene-nme5	0
BP	GO:0009309	amine biosynthetic process	1/646	13/11595	0.525566183547289	0.933857268286506	gene-ddc	1	ddc	1	gene-ddc	0
BP	GO:0009310	amine catabolic process	1/646	13/11595	0.525566183547289	0.933857268286506	gene-LOC122866402	1	LOC122866402	1	gene-LOC122866402	0
BP	GO:0009948	anterior/posterior axis specification	1/646	13/11595	0.525566183547289	0.933857268286506	gene-tdrd6	1	tdrd6	1	gene-tdrd6	0
BP	GO:0010507	negative regulation of autophagy	1/646	13/11595	0.525566183547289	0.933857268286506	gene-nupr1b	1	nupr1b	1	gene-nupr1b	0
BP	GO:0010842	retina layer formation	1/646	13/11595	0.525566183547289	0.933857268286506	gene-rpgrb	1	rpgrb	0	-	1
BP	GO:0034620	cellular response to unfolded protein	1/646	13/11595	0.525566183547289	0.933857268286506	gene-LOC122878127	1	LOC122878127	1	gene-LOC122878127	0
BP	GO:0035108	limb morphogenesis	1/646	13/11595	0.525566183547289	0.933857268286506	gene-sp8a	1	sp8a	0	-	1
BP	GO:0035113	embryonic appendage morphogenesis	1/646	13/11595	0.525566183547289	0.933857268286506	gene-sp8a	1	sp8a	0	-	1
BP	GO:0042401	cellular biogenic amine biosynthetic process	1/646	13/11595	0.525566183547289	0.933857268286506	gene-ddc	1	ddc	1	gene-ddc	0
BP	GO:0042402	cellular biogenic amine catabolic process	1/646	13/11595	0.525566183547289	0.933857268286506	gene-LOC122866402	1	LOC122866402	1	gene-LOC122866402	0
BP	GO:0042462	eye photoreceptor cell development	1/646	13/11595	0.525566183547289	0.933857268286506	gene-rpgrb	1	rpgrb	0	-	1
BP	GO:0043243	positive regulation of protein-containing complex disassembly	1/646	13/11595	0.525566183547289	0.933857268286506	gene-LOC122886528	1	LOC122886528	1	gene-LOC122886528	0
BP	GO:0046036	CTP metabolic process	1/646	13/11595	0.525566183547289	0.933857268286506	gene-nme5	1	nme5	1	gene-nme5	0
BP	GO:0046040	IMP metabolic process	1/646	13/11595	0.525566183547289	0.933857268286506	gene-ampd3a	1	ampd3a	0	-	1
BP	GO:0048010	vascular endothelial growth factor receptor signaling pathway	1/646	13/11595	0.525566183547289	0.933857268286506	gene-vegfc	1	vegfc	0	-	1
BP	GO:0048546	digestive tract morphogenesis	1/646	13/11595	0.525566183547289	0.933857268286506	gene-pard6gb	1	pard6gb	0	-	1
BP	GO:0050821	protein stabilization	1/646	13/11595	0.525566183547289	0.933857268286506	gene-LOC122878127	1	LOC122878127	1	gene-LOC122878127	0
BP	GO:0072089	stem cell proliferation	1/646	13/11595	0.525566183547289	0.933857268286506	gene-snai2	1	snai2	0	-	1
BP	GO:0090316	positive regulation of intracellular protein transport	1/646	13/11595	0.525566183547289	0.933857268286506	gene-LOC122878127	1	LOC122878127	1	gene-LOC122878127	0
BP	GO:0097120	receptor localization to synapse	1/646	13/11595	0.525566183547289	0.933857268286506	gene-nptx1l	1	nptx1l	1	gene-nptx1l	0
BP	GO:0099601	regulation of neurotransmitter receptor activity	1/646	13/11595	0.525566183547289	0.933857268286506	gene-nptx1l	1	nptx1l	1	gene-nptx1l	0
BP	GO:1901532	regulation of hematopoietic progenitor cell differentiation	1/646	13/11595	0.525566183547289	0.933857268286506	gene-nfkbiaa	1	nfkbiaa	1	gene-nfkbiaa	0
BP	GO:1903364	positive regulation of cellular protein catabolic process	1/646	13/11595	0.525566183547289	0.933857268286506	gene-nupr1b	1	nupr1b	1	gene-nupr1b	0
BP	GO:0048592	eye morphogenesis	4/646	68/11595	0.529263171407844	0.939455784129506	gene-znf703/gene-sox4b/gene-id2a/gene-rpgrb	4	id2a/rpgrb/sox4b/znf703	0	-	4
BP	GO:0048598	embryonic morphogenesis	13/646	232/11595	0.532634573000958	0.943013456711451	gene-skib/gene-snai1a/gene-znf703/gene-LOC122877917/gene-gpc4/gene-sox4b/gene-pard6gb/gene-sp8a/gene-phldb2b/gene-fzd2/gene-pthlha/gene-cacna1c/gene-LOC122871826	13	cacna1c/fzd2/gpc4/LOC122871826/LOC122877917/pard6gb/phldb2b/pthlha/skib/snai1a/sox4b/sp8a/znf703	1	gene-LOC122877917	12
BP	GO:0003018	vascular process in circulatory system	3/646	50/11595	0.532912255769494	0.943013456711451	gene-LOC122863516/gene-edn1/gene-pawr	3	edn1/LOC122863516/pawr	0	-	3
BP	GO:1901879	regulation of protein depolymerization	3/646	50/11595	0.532912255769494	0.943013456711451	gene-swap70a/gene-LOC122879509/gene-tmod4	3	LOC122879509/swap70a/tmod4	2	gene-LOC122879509/gene-tmod4	1
BP	GO:0051259	protein complex oligomerization	6/646	105/11595	0.534552671555089	0.944944085380013	gene-LOC122865058/gene-LOC122884571/gene-trpm6/gene-kctd14/gene-kctd12b/gene-kcng2	6	kcng2/kctd12b/kctd14/LOC122865058/LOC122884571/trpm6	3	gene-kcng2/gene-kctd14/gene-LOC122884571	3
BP	GO:0005975	carbohydrate metabolic process	16/646	287/11595	0.536272097155482	0.947010274237607	gene-h6pd/gene-glb1/gene-gpia/gene-gck/gene-LOC122878127/gene-aldob/gene-insb/gene-gapdhs/gene-LOC122883755/gene-LOC122883245/gene-LOC122885239/gene-pck2/gene-enosf1/gene-nupr1b/gene-tbc1d16/gene-pfkfb3	16	aldob/enosf1/gapdhs/gck/glb1/gpia/h6pd/insb/LOC122878127/LOC122883245/LOC122883755/LOC122885239/nupr1b/pck2/pfkfb3/tbc1d16	15	gene-aldob/gene-enosf1/gene-gapdhs/gene-gck/gene-glb1/gene-gpia/gene-h6pd/gene-insb/gene-LOC122878127/gene-LOC122883245/gene-LOC122883755/gene-LOC122885239/gene-nupr1b/gene-pck2/gene-pfkfb3	1
BP	GO:0032270	positive regulation of cellular protein metabolic process	9/646	160/11595	0.537300917902661	0.947104389477216	gene-dok7b/gene-znf703/gene-LOC122878127/gene-LOC122877917/gene-LOC122881737/gene-snai2/gene-LOC122886518/gene-nupr1b/gene-LOC122871413	9	dok7b/LOC122871413/LOC122877917/LOC122878127/LOC122881737/LOC122886518/nupr1b/snai2/znf703	5	gene-LOC122871413/gene-LOC122877917/gene-LOC122878127/gene-LOC122886518/gene-nupr1b	4
BP	GO:0009165	nucleotide biosynthetic process	8/646	142/11595	0.539059454324373	0.947104389477216	gene-dut/gene-ampd3a/gene-zgc:162144/gene-nme5/gene-LOC122882904/gene-acaca/gene-cmpk2/gene-LOC122869764	8	acaca/ampd3a/cmpk2/dut/LOC122869764/LOC122882904/nme5/zgc:162144	5	gene-acaca/gene-cmpk2/gene-LOC122869764/gene-nme5/gene-zgc:162144	3
BP	GO:0018193	peptidyl-amino acid modification	8/646	142/11595	0.539059454324373	0.947104389477216	gene-padi2/gene-dok7b/gene-ndnf/gene-znf296/gene-snai2/gene-gfi1aa/gene-loxl3b/gene-LOC122869123	8	dok7b/gfi1aa/LOC122869123/loxl3b/ndnf/padi2/snai2/znf296	3	gene-gfi1aa/gene-LOC122869123/gene-padi2	5
BP	GO:0006470	protein dephosphorylation	2/646	32/11595	0.539078603080345	0.947104389477216	gene-swap70a/gene-cttnbp2nla	2	cttnbp2nla/swap70a	0	-	2
BP	GO:0045785	positive regulation of cell adhesion	2/646	32/11595	0.539078603080345	0.947104389477216	gene-LOC122874995/gene-ndnf	2	LOC122874995/ndnf	1	gene-LOC122874995	1
BP	GO:0001934	positive regulation of protein phosphorylation	4/646	69/11595	0.540928601119991	0.947285298824584	gene-dok7b/gene-LOC122878127/gene-LOC122886518/gene-LOC122871413	4	dok7b/LOC122871413/LOC122878127/LOC122886518	3	gene-LOC122871413/gene-LOC122878127/gene-LOC122886518	1
BP	GO:0001889	liver development	3/646	51/11595	0.546464071076334	0.947285298824584	gene-cebpa/gene-id2a/gene-mrtfbb	3	cebpa/id2a/mrtfbb	1	gene-cebpa	2
BP	GO:0006816	calcium ion transport	3/646	51/11595	0.546464071076334	0.947285298824584	gene-LOC122886797/gene-cacna1g/gene-cacna1c	3	cacna1c/cacna1g/LOC122886797	1	gene-LOC122886797	2
BP	GO:0001667	ameboidal-type cell migration	5/646	88/11595	0.547521367461668	0.947285298824584	gene-snai1a/gene-vegfc/gene-LOC122877917/gene-gpc4/gene-snai2	5	gpc4/LOC122877917/snai1a/snai2/vegfc	1	gene-LOC122877917	4
BP	GO:0001702	gastrulation with mouth forming second	1/646	14/11595	0.552028301094211	0.947285298824584	gene-gpc4	1	gpc4	0	-	1
BP	GO:0001736	establishment of planar polarity	1/646	14/11595	0.552028301094211	0.947285298824584	gene-sapcd1	1	sapcd1	1	gene-sapcd1	0
BP	GO:0001824	blastocyst development	1/646	14/11595	0.552028301094211	0.947285298824584	gene-LOC122877917	1	LOC122877917	1	gene-LOC122877917	0
BP	GO:0006595	polyamine metabolic process	1/646	14/11595	0.552028301094211	0.947285298824584	gene-LOC122866402	1	LOC122866402	1	gene-LOC122866402	0
BP	GO:0007164	establishment of tissue polarity	1/646	14/11595	0.552028301094211	0.947285298824584	gene-sapcd1	1	sapcd1	1	gene-sapcd1	0
BP	GO:0007586	digestion	1/646	14/11595	0.552028301094211	0.947285298824584	gene-ucn3l	1	ucn3l	1	gene-ucn3l	0
BP	GO:0009636	response to toxic substance	1/646	14/11595	0.552028301094211	0.947285298824584	gene-nupr1b	1	nupr1b	1	gene-nupr1b	0
BP	GO:0009755	hormone-mediated signaling pathway	1/646	14/11595	0.552028301094211	0.947285298824584	gene-LOC122865952	1	LOC122865952	0	-	1
BP	GO:0014074	response to purine-containing compound	1/646	14/11595	0.552028301094211	0.947285298824584	gene-LOC122878127	1	LOC122878127	1	gene-LOC122878127	0
BP	GO:0036303	lymph vessel morphogenesis	1/646	14/11595	0.552028301094211	0.947285298824584	gene-vegfc	1	vegfc	0	-	1
BP	GO:0043101	purine-containing compound salvage	1/646	14/11595	0.552028301094211	0.947285298824584	gene-ampd3a	1	ampd3a	0	-	1
BP	GO:0046683	response to organophosphorus	1/646	14/11595	0.552028301094211	0.947285298824584	gene-LOC122878127	1	LOC122878127	1	gene-LOC122878127	0
BP	GO:0060759	regulation of response to cytokine stimulus	1/646	14/11595	0.552028301094211	0.947285298824584	gene-LOC122877917	1	LOC122877917	1	gene-LOC122877917	0
BP	GO:0070192	chromosome organization involved in meiotic cell cycle	1/646	14/11595	0.552028301094211	0.947285298824584	gene-terb1	1	terb1	1	gene-terb1	0
BP	GO:0099518	vesicle cytoskeletal trafficking	1/646	14/11595	0.552028301094211	0.947285298824584	gene-LOC122886528	1	LOC122886528	1	gene-LOC122886528	0
BP	GO:1903008	organelle disassembly	1/646	14/11595	0.552028301094211	0.947285298824584	gene-retreg1	1	retreg1	1	gene-retreg1	0
BP	GO:0048511	rhythmic process	4/646	70/11595	0.552444976550643	0.947285298824584	gene-LOC122875367/gene-otx5/gene-camk1gb/gene-LOC122869516	4	camk1gb/LOC122869516/LOC122875367/otx5	3	gene-camk1gb/gene-LOC122869516/gene-otx5	1
BP	GO:0055065	metal ion homeostasis	4/646	70/11595	0.552444976550643	0.947285298824584	gene-swap70a/gene-LOC122881776/gene-slc31a2/gene-LOC122868396	4	LOC122868396/LOC122881776/slc31a2/swap70a	3	gene-LOC122868396/gene-LOC122881776/gene-slc31a2	1
BP	GO:1901293	nucleoside phosphate biosynthetic process	8/646	144/11595	0.555174825517245	0.947285298824584	gene-dut/gene-ampd3a/gene-zgc:162144/gene-nme5/gene-LOC122882904/gene-acaca/gene-cmpk2/gene-LOC122869764	8	acaca/ampd3a/cmpk2/dut/LOC122869764/LOC122882904/nme5/zgc:162144	5	gene-acaca/gene-cmpk2/gene-LOC122869764/gene-nme5/gene-zgc:162144	3
BP	GO:0051693	actin filament capping	2/646	33/11595	0.555903365055118	0.947285298824584	gene-LOC122879509/gene-tmod4	2	LOC122879509/tmod4	2	gene-LOC122879509/gene-tmod4	0
BP	GO:0120032	regulation of plasma membrane bounded cell projection assembly	2/646	33/11595	0.555903365055118	0.947285298824584	gene-vdac3/gene-LOC122878127	2	LOC122878127/vdac3	2	gene-LOC122878127/gene-vdac3	0
BP	GO:0006091	generation of precursor metabolites and energy	9/646	163/11595	0.560052133320997	0.947285298824584	gene-h6pd/gene-gpia/gene-gck/gene-aldob/gene-gapdhs/gene-LOC122883245/gene-LOC122882574/gene-nupr1b/gene-LOC122869272	9	aldob/gapdhs/gck/gpia/h6pd/LOC122869272/LOC122882574/LOC122883245/nupr1b	9	gene-aldob/gene-gapdhs/gene-gck/gene-gpia/gene-h6pd/gene-LOC122869272/gene-LOC122882574/gene-LOC122883245/gene-nupr1b	0
BP	GO:0008610	lipid biosynthetic process	11/646	200/11595	0.56205775188668	0.947285298824584	gene-ddit3/gene-scdb/gene-snai2/gene-acaca/gene-lpin1b/gene-LOC122866220/gene-ch25h/gene-scd/gene-fasn/gene-rdh8a/gene-LOC122871599	11	acaca/ch25h/ddit3/fasn/LOC122866220/LOC122871599/lpin1b/rdh8a/scd/scdb/snai2	9	gene-acaca/gene-ch25h/gene-ddit3/gene-fasn/gene-LOC122866220/gene-LOC122871599/gene-lpin1b/gene-scd/gene-scdb	2
BP	GO:0007265	Ras protein signal transduction	6/646	108/11595	0.562485798314261	0.947285298824584	gene-si:ch211-286b5.4/gene-rtkna/gene-rasgrp3/gene-arfgef3/gene-LOC122865952/gene-iqsec3a	6	arfgef3/iqsec3a/LOC122865952/rasgrp3/rtkna/si:ch211-286b5.4	4	gene-arfgef3/gene-iqsec3a/gene-rasgrp3/gene-si:ch211-286b5.4	2
BP	GO:0060271	cilium assembly	9/646	164/11595	0.567533448634801	0.947285298824584	gene-si:ch211-286b5.4/gene-odad3/gene-znf703/gene-vdac3/gene-cep126/gene-ccdc13/gene-cfap410/gene-fzd2/gene-rpgrb	9	ccdc13/cep126/cfap410/fzd2/odad3/rpgrb/si:ch211-286b5.4/vdac3/znf703	3	gene-ccdc13/gene-si:ch211-286b5.4/gene-vdac3	6
BP	GO:0009152	purine ribonucleotide biosynthetic process	5/646	90/11595	0.567774325974391	0.947285298824584	gene-ampd3a/gene-nme5/gene-LOC122882904/gene-acaca/gene-LOC122869764	5	acaca/ampd3a/LOC122869764/LOC122882904/nme5	3	gene-acaca/gene-LOC122869764/gene-nme5	2
BP	GO:0048880	sensory system development	10/646	183/11595	0.571651564153235	0.947285298824584	gene-znf703/gene-LOC122877917/gene-zgc:162144/gene-crybb1l1/gene-gpc4/gene-sox4b/gene-cryba2b/gene-id2a/gene-slc7a14a/gene-rpgrb	10	cryba2b/crybb1l1/gpc4/id2a/LOC122877917/rpgrb/slc7a14a/sox4b/zgc:162144/znf703	5	gene-cryba2b/gene-crybb1l1/gene-LOC122877917/gene-slc7a14a/gene-zgc:162144	5
BP	GO:0002221	pattern recognition receptor signaling pathway	2/646	34/11595	0.57228748110051	0.947285298824584	gene-tlr3/gene-ifi35	2	ifi35/tlr3	1	gene-ifi35	1
BP	GO:0006576	cellular biogenic amine metabolic process	2/646	34/11595	0.57228748110051	0.947285298824584	gene-ddc/gene-LOC122866402	2	ddc/LOC122866402	2	gene-ddc/gene-LOC122866402	0
BP	GO:0009266	response to temperature stimulus	2/646	34/11595	0.57228748110051	0.947285298824584	gene-metrnlb/gene-LOC122868714	2	LOC122868714/metrnlb	1	gene-metrnlb	1
BP	GO:0035282	segmentation	2/646	34/11595	0.57228748110051	0.947285298824584	gene-tdrd6/gene-LOC122869123	2	LOC122869123/tdrd6	2	gene-LOC122869123/gene-tdrd6	0
BP	GO:0007051	spindle organization	3/646	53/11595	0.572863828384968	0.947285298824584	gene-LOC122877630/gene-cep126/gene-tacc2	3	cep126/LOC122877630/tacc2	2	gene-LOC122877630/gene-tacc2	1
BP	GO:0044272	sulfur compound biosynthetic process	3/646	53/11595	0.572863828384968	0.947285298824584	gene-LOC122876938/gene-acaca/gene-cbsa	3	acaca/cbsa/LOC122876938	3	gene-acaca/gene-cbsa/gene-LOC122876938	0
BP	GO:0051247	positive regulation of protein metabolic process	9/646	165/11595	0.574960140373608	0.947285298824584	gene-dok7b/gene-znf703/gene-LOC122878127/gene-LOC122877917/gene-LOC122881737/gene-snai2/gene-LOC122886518/gene-nupr1b/gene-LOC122871413	9	dok7b/LOC122871413/LOC122877917/LOC122878127/LOC122881737/LOC122886518/nupr1b/snai2/znf703	5	gene-LOC122871413/gene-LOC122877917/gene-LOC122878127/gene-LOC122886518/gene-nupr1b	4
BP	GO:0050678	regulation of epithelial cell proliferation	4/646	72/11595	0.575008923247969	0.947285298824584	gene-vegfc/gene-snai2/gene-nupr1b/gene-LOC122869242	4	LOC122869242/nupr1b/snai2/vegfc	2	gene-LOC122869242/gene-nupr1b	2
BP	GO:0001738	morphogenesis of a polarized epithelium	1/646	15/11595	0.577016619675779	0.947285298824584	gene-sapcd1	1	sapcd1	1	gene-sapcd1	0
BP	GO:0002285	lymphocyte activation involved in immune response	1/646	15/11595	0.577016619675779	0.947285298824584	gene-swap70a	1	swap70a	0	-	1
BP	GO:0009743	response to carbohydrate	1/646	15/11595	0.577016619675779	0.947285298824584	gene-nptx1l	1	nptx1l	1	gene-nptx1l	0
BP	GO:0009746	response to hexose	1/646	15/11595	0.577016619675779	0.947285298824584	gene-nptx1l	1	nptx1l	1	gene-nptx1l	0
BP	GO:0009749	response to glucose	1/646	15/11595	0.577016619675779	0.947285298824584	gene-nptx1l	1	nptx1l	1	gene-nptx1l	0
BP	GO:0021879	forebrain neuron differentiation	1/646	15/11595	0.577016619675779	0.947285298824584	gene-ndnf	1	ndnf	0	-	1
BP	GO:0030072	peptide hormone secretion	1/646	15/11595	0.577016619675779	0.947285298824584	gene-gck	1	gck	1	gene-gck	0
BP	GO:0030073	insulin secretion	1/646	15/11595	0.577016619675779	0.947285298824584	gene-gck	1	gck	1	gene-gck	0
BP	GO:0031623	receptor internalization	1/646	15/11595	0.577016619675779	0.947285298824584	gene-wdr54	1	wdr54	0	-	1
BP	GO:0032456	endocytic recycling	1/646	15/11595	0.577016619675779	0.947285298824584	gene-LOC122872091	1	LOC122872091	0	-	1
BP	GO:0034284	response to monosaccharide	1/646	15/11595	0.577016619675779	0.947285298824584	gene-nptx1l	1	nptx1l	1	gene-nptx1l	0
BP	GO:0042219	cellular modified amino acid catabolic process	1/646	15/11595	0.577016619675779	0.947285298824584	gene-aldh1l2	1	aldh1l2	1	gene-aldh1l2	0
BP	GO:0043467	regulation of generation of precursor metabolites and energy	1/646	15/11595	0.577016619675779	0.947285298824584	gene-nupr1b	1	nupr1b	1	gene-nupr1b	0
BP	GO:0043954	cellular component maintenance	1/646	15/11595	0.577016619675779	0.947285298824584	gene-pdzph1	1	pdzph1	1	gene-pdzph1	0
BP	GO:0045766	positive regulation of angiogenesis	1/646	15/11595	0.577016619675779	0.947285298824584	gene-LOC122877917	1	LOC122877917	1	gene-LOC122877917	0
BP	GO:0045995	regulation of embryonic development	1/646	15/11595	0.577016619675779	0.947285298824584	gene-phldb2b	1	phldb2b	0	-	1
BP	GO:0046545	development of primary female sexual characteristics	1/646	15/11595	0.577016619675779	0.947285298824584	gene-nupr1b	1	nupr1b	1	gene-nupr1b	0
BP	GO:0048709	oligodendrocyte differentiation	1/646	15/11595	0.577016619675779	0.947285298824584	gene-omgb	1	omgb	1	gene-omgb	0
BP	GO:0050905	neuromuscular process	1/646	15/11595	0.577016619675779	0.947285298824584	gene-spartb	1	spartb	1	gene-spartb	0
BP	GO:0051262	protein tetramerization	1/646	15/11595	0.577016619675779	0.947285298824584	gene-trpm6	1	trpm6	0	-	1
BP	GO:0060219	camera-type eye photoreceptor cell differentiation	1/646	15/11595	0.577016619675779	0.947285298824584	gene-rpgrb	1	rpgrb	0	-	1
BP	GO:0060997	dendritic spine morphogenesis	1/646	15/11595	0.577016619675779	0.947285298824584	gene-si:ch211-278a6.1	1	si:ch211-278a6.1	1	gene-si:ch211-278a6.1	0
BP	GO:1903038	negative regulation of leukocyte cell-cell adhesion	1/646	15/11595	0.577016619675779	0.947285298824584	gene-LOC122877917	1	LOC122877917	1	gene-LOC122877917	0
BP	GO:1903828	negative regulation of cellular protein localization	1/646	15/11595	0.577016619675779	0.947285298824584	gene-sapcd1	1	sapcd1	1	gene-sapcd1	0
BP	GO:1904018	positive regulation of vasculature development	1/646	15/11595	0.577016619675779	0.947285298824584	gene-LOC122877917	1	LOC122877917	1	gene-LOC122877917	0
BP	GO:2000278	regulation of DNA biosynthetic process	1/646	15/11595	0.577016619675779	0.947285298824584	gene-LOC122877917	1	LOC122877917	1	gene-LOC122877917	0
BP	GO:0032880	regulation of protein localization	5/646	91/11595	0.577724642892862	0.947285298824584	gene-swap70a/gene-gck/gene-LOC122877630/gene-LOC122878127/gene-sapcd1	5	gck/LOC122877630/LOC122878127/sapcd1/swap70a	4	gene-gck/gene-LOC122877630/gene-LOC122878127/gene-sapcd1	1
BP	GO:0019637	organophosphate metabolic process	25/646	460/11595	0.581970002363664	0.947285298824584	gene-dut/gene-ampd3a/gene-h6pd/gene-LOC122872164/gene-LOC122874604/gene-gpia/gene-gck/gene-plppr3b/gene-pde4ba/gene-LOC122878127/gene-plpp3/gene-itpkcb/gene-zgc:162144/gene-aldob/gene-nme5/gene-smpdl3b/gene-gapdhs/gene-LOC122882904/gene-LOC122883245/gene-LOC122886641/gene-acaca/gene-cmpk2/gene-nupr1b/gene-LOC122869764/gene-pfkfb3	25	acaca/aldob/ampd3a/cmpk2/dut/gapdhs/gck/gpia/h6pd/itpkcb/LOC122869764/LOC122872164/LOC122874604/LOC122878127/LOC122882904/LOC122883245/LOC122886641/nme5/nupr1b/pde4ba/pfkfb3/plpp3/plppr3b/smpdl3b/zgc:162144	17	gene-acaca/gene-aldob/gene-cmpk2/gene-gapdhs/gene-gck/gene-gpia/gene-h6pd/gene-LOC122869764/gene-LOC122872164/gene-LOC122878127/gene-LOC122883245/gene-LOC122886641/gene-nme5/gene-nupr1b/gene-pfkfb3/gene-plppr3b/gene-zgc:162144	8
BP	GO:0006473	protein acetylation	2/646	35/11595	0.588227759480268	0.947285298824584	gene-snai2/gene-nupr1b	2	nupr1b/snai2	1	gene-nupr1b	1
BP	GO:0007033	vacuole organization	2/646	35/11595	0.588227759480268	0.947285298824584	gene-rab32a/gene-nupr1b	2	nupr1b/rab32a	2	gene-nupr1b/gene-rab32a	0
BP	GO:0007602	phototransduction	2/646	35/11595	0.588227759480268	0.947285298824584	gene-grk1a/gene-LOC122887291	2	grk1a/LOC122887291	2	gene-grk1a/gene-LOC122887291	0
BP	GO:0044106	cellular amine metabolic process	2/646	35/11595	0.588227759480268	0.947285298824584	gene-ddc/gene-LOC122866402	2	ddc/LOC122866402	2	gene-ddc/gene-LOC122866402	0
BP	GO:1901991	negative regulation of mitotic cell cycle phase transition	2/646	35/11595	0.588227759480268	0.947285298824584	gene-LOC122877917/gene-LOC122865952	2	LOC122865952/LOC122877917	1	gene-LOC122877917	1
BP	GO:0034762	regulation of transmembrane transport	11/646	205/11595	0.59543993459903	0.947285298824584	gene-LOC122884571/gene-cttnbp2nla/gene-scn1laa/gene-LOC122886797/gene-kcnj15/gene-kcnh5b/gene-LOC122864783/gene-kcng2/gene-kcnj2a/gene-cacna1g/gene-cacna1c	11	cacna1c/cacna1g/cttnbp2nla/kcng2/kcnh5b/kcnj15/kcnj2a/LOC122864783/LOC122884571/LOC122886797/scn1laa	6	gene-kcng2/gene-kcnh5b/gene-kcnj2a/gene-LOC122884571/gene-LOC122886797/gene-scn1laa	5
BP	GO:0043408	regulation of MAPK cascade	4/646	74/11595	0.596916485151807	0.947285298824584	gene-wdr54/gene-LOC122877917/gene-klhl43/gene-dok6	4	dok6/klhl43/LOC122877917/wdr54	3	gene-dok6/gene-klhl43/gene-LOC122877917	1
BP	GO:0031329	regulation of cellular catabolic process	5/646	93/11595	0.597254581847188	0.947285298824584	gene-ctns/gene-LOC122886528/gene-nupr1b/gene-dram1/gene-dcn	5	ctns/dcn/dram1/LOC122886528/nupr1b	5	gene-ctns/gene-dcn/gene-dram1/gene-LOC122886528/gene-nupr1b	0
BP	GO:0051260	protein homooligomerization	5/646	93/11595	0.597254581847188	0.947285298824584	gene-LOC122865058/gene-LOC122884571/gene-kctd14/gene-kctd12b/gene-kcng2	5	kcng2/kctd12b/kctd14/LOC122865058/LOC122884571	3	gene-kcng2/gene-kctd14/gene-LOC122884571	2
BP	GO:0002250	adaptive immune response	3/646	55/11595	0.598287116537274	0.947285298824584	gene-swap70a/gene-LOC122869371/gene-LOC122870587	3	LOC122869371/LOC122870587/swap70a	2	gene-LOC122869371/gene-LOC122870587	1
BP	GO:0000045	autophagosome assembly	1/646	16/11595	0.600613101859669	0.947285298824584	gene-nupr1b	1	nupr1b	1	gene-nupr1b	0
BP	GO:0001838	embryonic epithelial tube formation	1/646	16/11595	0.600613101859669	0.947285298824584	gene-pard6gb	1	pard6gb	0	-	1
BP	GO:0001841	neural tube formation	1/646	16/11595	0.600613101859669	0.947285298824584	gene-pard6gb	1	pard6gb	0	-	1
BP	GO:0006275	regulation of DNA replication	1/646	16/11595	0.600613101859669	0.947285298824584	gene-LOC122868820	1	LOC122868820	0	-	1
BP	GO:0007173	epidermal growth factor receptor signaling pathway	1/646	16/11595	0.600613101859669	0.947285298824584	gene-wdr54	1	wdr54	0	-	1
BP	GO:0007632	visual behavior	1/646	16/11595	0.600613101859669	0.947285298824584	gene-nyx	1	nyx	1	gene-nyx	0
BP	GO:0008589	regulation of smoothened signaling pathway	1/646	16/11595	0.600613101859669	0.947285298824584	gene-sox4b	1	sox4b	0	-	1
BP	GO:0009225	nucleotide-sugar metabolic process	1/646	16/11595	0.600613101859669	0.947285298824584	gene-gfpt2	1	gfpt2	1	gene-gfpt2	0
BP	GO:0009612	response to mechanical stimulus	1/646	16/11595	0.600613101859669	0.947285298824584	gene-tnca	1	tnca	0	-	1
BP	GO:0021872	forebrain generation of neurons	1/646	16/11595	0.600613101859669	0.947285298824584	gene-ndnf	1	ndnf	0	-	1
BP	GO:0030865	cortical cytoskeleton organization	1/646	16/11595	0.600613101859669	0.947285298824584	gene-amotl2a	1	amotl2a	0	-	1
BP	GO:0030866	cortical actin cytoskeleton organization	1/646	16/11595	0.600613101859669	0.947285298824584	gene-amotl2a	1	amotl2a	0	-	1
BP	GO:0033059	cellular pigmentation	1/646	16/11595	0.600613101859669	0.947285298824584	gene-LOC122885551	1	LOC122885551	1	gene-LOC122885551	0
BP	GO:0033339	pectoral fin development	1/646	16/11595	0.600613101859669	0.947285298824584	gene-sp8a	1	sp8a	0	-	1
BP	GO:0035265	organ growth	1/646	16/11595	0.600613101859669	0.947285298824584	gene-cacna1c	1	cacna1c	0	-	1
BP	GO:0035967	cellular response to topologically incorrect protein	1/646	16/11595	0.600613101859669	0.947285298824584	gene-LOC122878127	1	LOC122878127	1	gene-LOC122878127	0
BP	GO:0043271	negative regulation of ion transport	1/646	16/11595	0.600613101859669	0.947285298824584	gene-LOC122886797	1	LOC122886797	1	gene-LOC122886797	0
BP	GO:0045132	meiotic chromosome segregation	1/646	16/11595	0.600613101859669	0.947285298824584	gene-terb1	1	terb1	1	gene-terb1	0
BP	GO:0045727	positive regulation of translation	1/646	16/11595	0.600613101859669	0.947285298824584	gene-LOC122886518	1	LOC122886518	1	gene-LOC122886518	0
BP	GO:0046660	female sex differentiation	1/646	16/11595	0.600613101859669	0.947285298824584	gene-nupr1b	1	nupr1b	1	gene-nupr1b	0
BP	GO:0048332	mesoderm morphogenesis	1/646	16/11595	0.600613101859669	0.947285298824584	gene-dact2	1	dact2	0	-	1
BP	GO:0071383	cellular response to steroid hormone stimulus	1/646	16/11595	0.600613101859669	0.947285298824584	gene-LOC122865952	1	LOC122865952	0	-	1
BP	GO:1903076	regulation of protein localization to plasma membrane	1/646	16/11595	0.600613101859669	0.947285298824584	gene-LOC122878127	1	LOC122878127	1	gene-LOC122878127	0
BP	GO:1903169	regulation of calcium ion transmembrane transport	1/646	16/11595	0.600613101859669	0.947285298824584	gene-LOC122886797	1	LOC122886797	1	gene-LOC122886797	0
BP	GO:1903532	positive regulation of secretion by cell	1/646	16/11595	0.600613101859669	0.947285298824584	gene-gck	1	gck	1	gene-gck	0
BP	GO:1905037	autophagosome organization	1/646	16/11595	0.600613101859669	0.947285298824584	gene-nupr1b	1	nupr1b	1	gene-nupr1b	0
BP	GO:2001022	positive regulation of response to DNA damage stimulus	1/646	16/11595	0.600613101859669	0.947285298824584	gene-cbx8a	1	cbx8a	0	-	1
BP	GO:0006606	protein import into nucleus	2/646	36/11595	0.603722728841581	0.947285298824584	gene-LOC122878127/gene-il12rb2l	2	il12rb2l/LOC122878127	2	gene-il12rb2l/gene-LOC122878127	0
BP	GO:0010001	glial cell differentiation	2/646	36/11595	0.603722728841581	0.947285298824584	gene-omgb/gene-ndrg1a	2	ndrg1a/omgb	2	gene-ndrg1a/gene-omgb	0
BP	GO:0051170	import into nucleus	2/646	36/11595	0.603722728841581	0.947285298824584	gene-LOC122878127/gene-il12rb2l	2	il12rb2l/LOC122878127	2	gene-il12rb2l/gene-LOC122878127	0
BP	GO:0051650	establishment of vesicle localization	2/646	36/11595	0.603722728841581	0.947285298824584	gene-LOC122885551/gene-LOC122886528	2	LOC122885551/LOC122886528	2	gene-LOC122885551/gene-LOC122886528	0
BP	GO:0060491	regulation of cell projection assembly	2/646	36/11595	0.603722728841581	0.947285298824584	gene-vdac3/gene-LOC122878127	2	LOC122878127/vdac3	2	gene-LOC122878127/gene-vdac3	0
BP	GO:1901988	negative regulation of cell cycle phase transition	2/646	36/11595	0.603722728841581	0.947285298824584	gene-LOC122877917/gene-LOC122865952	2	LOC122865952/LOC122877917	1	gene-LOC122877917	1
BP	GO:0032102	negative regulation of response to external stimulus	5/646	94/11595	0.606827694855531	0.947285298824584	gene-metrnlb/gene-phldb2b/gene-LOC122868714/gene-LOC122869242/gene-tafa5a	5	LOC122868714/LOC122869242/metrnlb/phldb2b/tafa5a	2	gene-LOC122869242/gene-metrnlb	3
BP	GO:0044270	cellular nitrogen compound catabolic process	7/646	132/11595	0.608181410510963	0.947285298824584	gene-dut/gene-LOC122872164/gene-hmox2a/gene-gda/gene-pde4ba/gene-hmox1a/gene-aldh1l2	7	aldh1l2/dut/gda/hmox1a/hmox2a/LOC122872164/pde4ba	4	gene-aldh1l2/gene-gda/gene-hmox1a/gene-LOC122872164	3
BP	GO:0046700	heterocycle catabolic process	7/646	132/11595	0.608181410510963	0.947285298824584	gene-dut/gene-LOC122872164/gene-hmox2a/gene-gda/gene-pde4ba/gene-hmox1a/gene-aldh1l2	7	aldh1l2/dut/gda/hmox1a/hmox2a/LOC122872164/pde4ba	4	gene-aldh1l2/gene-gda/gene-hmox1a/gene-LOC122872164	3
BP	GO:0048593	camera-type eye morphogenesis	3/646	56/11595	0.610621451836175	0.947285298824584	gene-znf703/gene-sox4b/gene-rpgrb	3	rpgrb/sox4b/znf703	0	-	3
BP	GO:0051604	protein maturation	3/646	56/11595	0.610621451836175	0.947285298824584	gene-plat/gene-LOC122870952/gene-LOC122871823	3	LOC122870952/LOC122871823/plat	2	gene-LOC122870952/gene-plat	1
BP	GO:0055001	muscle cell development	3/646	56/11595	0.610621451836175	0.947285298824584	gene-lrrc39/gene-gpc4/gene-tmod4	3	gpc4/lrrc39/tmod4	2	gene-lrrc39/gene-tmod4	1
BP	GO:0061371	determination of heart left/right asymmetry	3/646	56/11595	0.610621451836175	0.947285298824584	gene-skib/gene-fzd2/gene-cacna1c	3	cacna1c/fzd2/skib	0	-	3
BP	GO:1903827	regulation of cellular protein localization	3/646	56/11595	0.610621451836175	0.947285298824584	gene-LOC122877630/gene-LOC122878127/gene-sapcd1	3	LOC122877630/LOC122878127/sapcd1	3	gene-LOC122877630/gene-LOC122878127/gene-sapcd1	0
BP	GO:0010941	regulation of cell death	15/646	282/11595	0.611912703158576	0.947285298824584	gene-LOC122878127/gene-LOC122877908/gene-ndnf/gene-boka/gene-LOC122877917/gene-tnfaip8l2b/gene-LOC122881737/gene-snai2/gene-angptl4/gene-ripk2/gene-trim69/gene-nupr1b/gene-LOC122868820/gene-zmp:0000000896/gene-phlda1	15	angptl4/boka/LOC122868820/LOC122877908/LOC122877917/LOC122878127/LOC122881737/ndnf/nupr1b/phlda1/ripk2/snai2/tnfaip8l2b/trim69/zmp:0000000896	6	gene-LOC122877908/gene-LOC122877917/gene-LOC122878127/gene-nupr1b/gene-ripk2/gene-trim69	9
BP	GO:0003002	regionalization	6/646	114/11595	0.615815228194966	0.947285298824584	gene-skib/gene-snai1a/gene-LOC122874938/gene-tdrd6/gene-LOC122869123/gene-caprin2	6	caprin2/LOC122869123/LOC122874938/skib/snai1a/tdrd6	3	gene-caprin2/gene-LOC122869123/gene-tdrd6	3
BP	GO:0002460	adaptive immune response based on somatic recombination of immune receptors built from immunoglobulin superfamily domains	2/646	37/11595	0.618772456971386	0.947285298824584	gene-swap70a/gene-LOC122870587	2	LOC122870587/swap70a	1	gene-LOC122870587	1
BP	GO:0007266	Rho protein signal transduction	2/646	37/11595	0.618772456971386	0.947285298824584	gene-rtkna/gene-LOC122865952	2	LOC122865952/rtkna	0	-	2
BP	GO:0009124	nucleoside monophosphate biosynthetic process	2/646	37/11595	0.618772456971386	0.947285298824584	gene-dut/gene-ampd3a	2	ampd3a/dut	0	-	2
BP	GO:0009308	amine metabolic process	2/646	37/11595	0.618772456971386	0.947285298824584	gene-ddc/gene-LOC122866402	2	ddc/LOC122866402	2	gene-ddc/gene-LOC122866402	0
BP	GO:0010970	transport along microtubule	2/646	37/11595	0.618772456971386	0.947285298824584	gene-si:ch211-286b5.4/gene-LOC122886528	2	LOC122886528/si:ch211-286b5.4	2	gene-LOC122886528/gene-si:ch211-286b5.4	0
BP	GO:0042310	vasoconstriction	2/646	37/11595	0.618772456971386	0.947285298824584	gene-LOC122863516/gene-edn1	2	edn1/LOC122863516	0	-	2
BP	GO:0046530	photoreceptor cell differentiation	2/646	37/11595	0.618772456971386	0.947285298824584	gene-id2a/gene-rpgrb	2	id2a/rpgrb	0	-	2
BP	GO:0051648	vesicle localization	2/646	37/11595	0.618772456971386	0.947285298824584	gene-LOC122885551/gene-LOC122886528	2	LOC122885551/LOC122886528	2	gene-LOC122885551/gene-LOC122886528	0
BP	GO:0006766	vitamin metabolic process	1/646	17/11595	0.62289515870384	0.947285298824584	gene-snai2	1	snai2	0	-	1
BP	GO:0006783	heme biosynthetic process	1/646	17/11595	0.62289515870384	0.947285298824584	gene-alas1	1	alas1	1	gene-alas1	0
BP	GO:0009112	nucleobase metabolic process	1/646	17/11595	0.62289515870384	0.947285298824584	gene-gda	1	gda	1	gene-gda	0
BP	GO:0009218	pyrimidine ribonucleotide metabolic process	1/646	17/11595	0.62289515870384	0.947285298824584	gene-nme5	1	nme5	1	gene-nme5	0
BP	GO:0009220	pyrimidine ribonucleotide biosynthetic process	1/646	17/11595	0.62289515870384	0.947285298824584	gene-nme5	1	nme5	1	gene-nme5	0
BP	GO:0016064	immunoglobulin mediated immune response	1/646	17/11595	0.62289515870384	0.947285298824584	gene-swap70a	1	swap70a	0	-	1
BP	GO:0019724	B cell mediated immunity	1/646	17/11595	0.62289515870384	0.947285298824584	gene-swap70a	1	swap70a	0	-	1
BP	GO:0031017	exocrine pancreas development	1/646	17/11595	0.62289515870384	0.947285298824584	gene-lnx2b	1	lnx2b	0	-	1
BP	GO:0043173	nucleotide salvage	1/646	17/11595	0.62289515870384	0.947285298824584	gene-ampd3a	1	ampd3a	0	-	1
BP	GO:0045732	positive regulation of protein catabolic process	1/646	17/11595	0.62289515870384	0.947285298824584	gene-nupr1b	1	nupr1b	1	gene-nupr1b	0
BP	GO:0045927	positive regulation of growth	1/646	17/11595	0.62289515870384	0.947285298824584	gene-znf296	1	znf296	0	-	1
BP	GO:0046631	alpha-beta T cell activation	1/646	17/11595	0.62289515870384	0.947285298824584	gene-wdfy4	1	wdfy4	1	gene-wdfy4	0
BP	GO:0046653	tetrahydrofolate metabolic process	1/646	17/11595	0.62289515870384	0.947285298824584	gene-aldh1l2	1	aldh1l2	1	gene-aldh1l2	0
BP	GO:0048259	regulation of receptor-mediated endocytosis	1/646	17/11595	0.62289515870384	0.947285298824584	gene-wdr54	1	wdr54	0	-	1
BP	GO:0051896	regulation of protein kinase B signaling	1/646	17/11595	0.62289515870384	0.947285298824584	gene-LOC122877917	1	LOC122877917	1	gene-LOC122877917	0
BP	GO:0060048	cardiac muscle contraction	1/646	17/11595	0.62289515870384	0.947285298824584	gene-nkx2.5	1	nkx2.5	0	-	1
BP	GO:0060218	hematopoietic stem cell differentiation	1/646	17/11595	0.62289515870384	0.947285298824584	gene-tgfb3	1	tgfb3	0	-	1
BP	GO:0060996	dendritic spine development	1/646	17/11595	0.62289515870384	0.947285298824584	gene-si:ch211-278a6.1	1	si:ch211-278a6.1	1	gene-si:ch211-278a6.1	0
BP	GO:0097061	dendritic spine organization	1/646	17/11595	0.62289515870384	0.947285298824584	gene-si:ch211-278a6.1	1	si:ch211-278a6.1	1	gene-si:ch211-278a6.1	0
BP	GO:1901215	negative regulation of neuron death	1/646	17/11595	0.62289515870384	0.947285298824584	gene-ndnf	1	ndnf	0	-	1
BP	GO:1901983	regulation of protein acetylation	1/646	17/11595	0.62289515870384	0.947285298824584	gene-snai2	1	snai2	0	-	1
BP	GO:1902017	regulation of cilium assembly	1/646	17/11595	0.62289515870384	0.947285298824584	gene-vdac3	1	vdac3	1	gene-vdac3	0
BP	GO:1903829	positive regulation of cellular protein localization	1/646	17/11595	0.62289515870384	0.947285298824584	gene-LOC122878127	1	LOC122878127	1	gene-LOC122878127	0
BP	GO:2000756	regulation of peptidyl-lysine acetylation	1/646	17/11595	0.62289515870384	0.947285298824584	gene-snai2	1	snai2	0	-	1
BP	GO:0031333	negative regulation of protein-containing complex assembly	5/646	96/11595	0.625575956521778	0.9496828289651	gene-pmepa1/gene-LOC122885147/gene-LOC122879509/gene-tmod4/gene-LOC122869242	5	LOC122869242/LOC122879509/LOC122885147/pmepa1/tmod4	4	gene-LOC122869242/gene-LOC122879509/gene-LOC122885147/gene-tmod4	1
BP	GO:0046034	ATP metabolic process	5/646	96/11595	0.625575956521778	0.9496828289651	gene-gpia/gene-gck/gene-aldob/gene-gapdhs/gene-nupr1b	5	aldob/gapdhs/gck/gpia/nupr1b	5	gene-aldob/gene-gapdhs/gene-gck/gene-gpia/gene-nupr1b	0
BP	GO:0008202	steroid metabolic process	4/646	77/11595	0.628480604521523	0.953158133973198	gene-snai2/gene-rdh8a/gene-nfe2l1a/gene-LOC122871599	4	LOC122871599/nfe2l1a/rdh8a/snai2	2	gene-LOC122871599/gene-nfe2l1a	2
BP	GO:0002443	leukocyte mediated immunity	2/646	38/11595	0.63337838435675	0.953158133973198	gene-swap70a/gene-tusc2a	2	swap70a/tusc2a	1	gene-tusc2a	1
BP	GO:0019216	regulation of lipid metabolic process	2/646	38/11595	0.63337838435675	0.953158133973198	gene-ddit3/gene-snai2	2	ddit3/snai2	1	gene-ddit3	1
BP	GO:0090257	regulation of muscle system process	2/646	38/11595	0.63337838435675	0.953158133973198	gene-LOC122877917/gene-tnnt1	2	LOC122877917/tnnt1	2	gene-LOC122877917/gene-tnnt1	0
BP	GO:0070925	organelle assembly	15/646	286/11595	0.633811196735095	0.953158133973198	gene-si:ch211-286b5.4/gene-odad3/gene-nptx1l/gene-znf703/gene-vdac3/gene-LOC122877630/gene-lrrc39/gene-cep126/gene-tmod4/gene-ccdc13/gene-cfap410/gene-tdrd6/gene-nupr1b/gene-fzd2/gene-rpgrb	15	ccdc13/cep126/cfap410/fzd2/LOC122877630/lrrc39/nptx1l/nupr1b/odad3/rpgrb/si:ch211-286b5.4/tdrd6/tmod4/vdac3/znf703	9	gene-ccdc13/gene-LOC122877630/gene-lrrc39/gene-nptx1l/gene-nupr1b/gene-si:ch211-286b5.4/gene-tdrd6/gene-tmod4/gene-vdac3	6
BP	GO:0019439	aromatic compound catabolic process	7/646	136/11595	0.639645530943991	0.953158133973198	gene-dut/gene-LOC122872164/gene-hmox2a/gene-gda/gene-pde4ba/gene-hmox1a/gene-aldh1l2	7	aldh1l2/dut/gda/hmox1a/hmox2a/LOC122872164/pde4ba	4	gene-aldh1l2/gene-gda/gene-hmox1a/gene-LOC122872164	3
BP	GO:0046649	lymphocyte activation	6/646	117/11595	0.641065466922269	0.953158133973198	gene-swap70a/gene-tusc2a/gene-LOC122878127/gene-znf296/gene-wdfy4/gene-LOC122869242	6	LOC122869242/LOC122878127/swap70a/tusc2a/wdfy4/znf296	4	gene-LOC122869242/gene-LOC122878127/gene-tusc2a/gene-wdfy4	2
BP	GO:0002683	negative regulation of immune system process	5/646	98/11595	0.643777612818655	0.953158133973198	gene-LOC122874995/gene-LOC122878127/gene-zbtb46/gene-LOC122869242/gene-lrrc17	5	LOC122869242/LOC122874995/LOC122878127/lrrc17/zbtb46	3	gene-LOC122869242/gene-LOC122874995/gene-LOC122878127	2
BP	GO:0006313	transposition, DNA-mediated	1/646	18/11595	0.643935902137707	0.953158133973198	gene-pgbd5	1	pgbd5	1	gene-pgbd5	0
BP	GO:0006760	folic acid-containing compound metabolic process	1/646	18/11595	0.643935902137707	0.953158133973198	gene-aldh1l2	1	aldh1l2	1	gene-aldh1l2	0
BP	GO:0006779	porphyrin-containing compound biosynthetic process	1/646	18/11595	0.643935902137707	0.953158133973198	gene-alas1	1	alas1	1	gene-alas1	0
BP	GO:0007254	JNK cascade	1/646	18/11595	0.643935902137707	0.953158133973198	gene-klhl43	1	klhl43	1	gene-klhl43	0
BP	GO:0007422	peripheral nervous system development	1/646	18/11595	0.643935902137707	0.953158133973198	gene-ndrg1a	1	ndrg1a	1	gene-ndrg1a	0
BP	GO:0010675	regulation of cellular carbohydrate metabolic process	1/646	18/11595	0.643935902137707	0.953158133973198	gene-nupr1b	1	nupr1b	1	gene-nupr1b	0
BP	GO:0019229	regulation of vasoconstriction	1/646	18/11595	0.643935902137707	0.953158133973198	gene-edn1	1	edn1	0	-	1
BP	GO:0019722	calcium-mediated signaling	1/646	18/11595	0.643935902137707	0.953158133973198	gene-rcan1b	1	rcan1b	1	gene-rcan1b	0
BP	GO:0032196	transposition	1/646	18/11595	0.643935902137707	0.953158133973198	gene-pgbd5	1	pgbd5	1	gene-pgbd5	0
BP	GO:0032872	regulation of stress-activated MAPK cascade	1/646	18/11595	0.643935902137707	0.953158133973198	gene-klhl43	1	klhl43	1	gene-klhl43	0
BP	GO:0033014	tetrapyrrole biosynthetic process	1/646	18/11595	0.643935902137707	0.953158133973198	gene-alas1	1	alas1	1	gene-alas1	0
BP	GO:0034250	positive regulation of cellular amide metabolic process	1/646	18/11595	0.643935902137707	0.953158133973198	gene-LOC122886518	1	LOC122886518	1	gene-LOC122886518	0
BP	GO:0035304	regulation of protein dephosphorylation	1/646	18/11595	0.643935902137707	0.953158133973198	gene-swap70a	1	swap70a	0	-	1
BP	GO:0035418	protein localization to synapse	1/646	18/11595	0.643935902137707	0.953158133973198	gene-nptx1l	1	nptx1l	1	gene-nptx1l	0
BP	GO:0043491	protein kinase B signaling	1/646	18/11595	0.643935902137707	0.953158133973198	gene-LOC122877917	1	LOC122877917	1	gene-LOC122877917	0
BP	GO:0046834	lipid phosphorylation	1/646	18/11595	0.643935902137707	0.953158133973198	gene-LOC122878127	1	LOC122878127	1	gene-LOC122878127	0
BP	GO:0046854	phosphatidylinositol phosphorylation	1/646	18/11595	0.643935902137707	0.953158133973198	gene-LOC122878127	1	LOC122878127	1	gene-LOC122878127	0
BP	GO:0051047	positive regulation of secretion	1/646	18/11595	0.643935902137707	0.953158133973198	gene-gck	1	gck	1	gene-gck	0
BP	GO:0070302	regulation of stress-activated protein kinase signaling cascade	1/646	18/11595	0.643935902137707	0.953158133973198	gene-klhl43	1	klhl43	1	gene-klhl43	0
BP	GO:1902107	positive regulation of leukocyte differentiation	1/646	18/11595	0.643935902137707	0.953158133973198	gene-zbtb46	1	zbtb46	0	-	1
BP	GO:2001234	negative regulation of apoptotic signaling pathway	1/646	18/11595	0.643935902137707	0.953158133973198	gene-snai2	1	snai2	0	-	1
BP	GO:0050680	negative regulation of epithelial cell proliferation	3/646	59/11595	0.646079699066346	0.954635066384054	gene-snai2/gene-nupr1b/gene-LOC122869242	3	LOC122869242/nupr1b/snai2	2	gene-LOC122869242/gene-nupr1b	1
BP	GO:0042445	hormone metabolic process	2/646	39/11595	0.647543171466343	0.954635066384054	gene-dio1/gene-rdh8a	2	dio1/rdh8a	0	-	2
BP	GO:0000165	MAPK cascade	4/646	79/11595	0.648625144369559	0.954635066384054	gene-wdr54/gene-LOC122877917/gene-klhl43/gene-dok6	4	dok6/klhl43/LOC122877917/wdr54	3	gene-dok6/gene-klhl43/gene-LOC122877917	1
BP	GO:0018205	peptidyl-lysine modification	4/646	80/11595	0.658421674736601	0.954635066384054	gene-znf296/gene-snai2/gene-gfi1aa/gene-loxl3b	4	gfi1aa/loxl3b/snai2/znf296	1	gene-gfi1aa	3
BP	GO:0016310	phosphorylation	12/646	234/11595	0.658591384738514	0.954635066384054	gene-dok7b/gene-gpia/gene-gck/gene-LOC122878127/gene-aldob/gene-gapdhs/gene-LOC122886518/gene-cmpk2/gene-klhl43/gene-LOC122869123/gene-nupr1b/gene-LOC122871413	12	aldob/cmpk2/dok7b/gapdhs/gck/gpia/klhl43/LOC122869123/LOC122871413/LOC122878127/LOC122886518/nupr1b	11	gene-aldob/gene-cmpk2/gene-gapdhs/gene-gck/gene-gpia/gene-klhl43/gene-LOC122869123/gene-LOC122871413/gene-LOC122878127/gene-LOC122886518/gene-nupr1b	1
BP	GO:0000209	protein polyubiquitination	2/646	40/11595	0.661270558744439	0.954635066384054	gene-lnx2b/gene-peli1b	2	lnx2b/peli1b	1	gene-peli1b	1
BP	GO:0008643	carbohydrate transport	2/646	40/11595	0.661270558744439	0.954635066384054	gene-LOC122889001/gene-slc2a2	2	LOC122889001/slc2a2	2	gene-LOC122889001/gene-slc2a2	0
BP	GO:0009583	detection of light stimulus	2/646	40/11595	0.661270558744439	0.954635066384054	gene-grk1a/gene-LOC122887291	2	grk1a/LOC122887291	2	gene-grk1a/gene-LOC122887291	0
BP	GO:0019221	cytokine-mediated signaling pathway	2/646	40/11595	0.661270558744439	0.954635066384054	gene-cxcl12b/gene-csf1ra	2	csf1ra/cxcl12b	1	gene-csf1ra	1
BP	GO:0034504	protein localization to nucleus	2/646	40/11595	0.661270558744439	0.954635066384054	gene-LOC122878127/gene-il12rb2l	2	il12rb2l/LOC122878127	2	gene-il12rb2l/gene-LOC122878127	0
BP	GO:0042063	gliogenesis	2/646	40/11595	0.661270558744439	0.954635066384054	gene-omgb/gene-ndrg1a	2	ndrg1a/omgb	2	gene-ndrg1a/gene-omgb	0
BP	GO:0050767	regulation of neurogenesis	2/646	40/11595	0.661270558744439	0.954635066384054	gene-znf296/gene-spartb	2	spartb/znf296	1	gene-spartb	1
BP	GO:2001020	regulation of response to DNA damage stimulus	2/646	40/11595	0.661270558744439	0.954635066384054	gene-snai2/gene-cbx8a	2	cbx8a/snai2	0	-	2
BP	GO:0030855	epithelial cell differentiation	5/646	100/11595	0.66141691589937	0.954635066384054	gene-LOC122870658/gene-LOC122877917/gene-LOC122882909/gene-LOC122882907/gene-LOC122865952	5	LOC122865952/LOC122870658/LOC122877917/LOC122882907/LOC122882909	4	gene-LOC122870658/gene-LOC122877917/gene-LOC122882907/gene-LOC122882909	1
BP	GO:0006813	potassium ion transport	1/646	19/11595	0.663804383369377	0.954635066384054	gene-LOC122878896	1	LOC122878896	1	gene-LOC122878896	0
BP	GO:0007029	endoplasmic reticulum organization	1/646	19/11595	0.663804383369377	0.954635066384054	gene-esyt1a	1	esyt1a	0	-	1
BP	GO:0008406	gonad development	1/646	19/11595	0.663804383369377	0.954635066384054	gene-nupr1b	1	nupr1b	1	gene-nupr1b	0
BP	GO:0009163	nucleoside biosynthetic process	1/646	19/11595	0.663804383369377	0.954635066384054	gene-nme5	1	nme5	1	gene-nme5	0
BP	GO:0010171	body morphogenesis	1/646	19/11595	0.663804383369377	0.954635066384054	gene-phldb2b	1	phldb2b	0	-	1
BP	GO:0010212	response to ionizing radiation	1/646	19/11595	0.663804383369377	0.954635066384054	gene-snai2	1	snai2	0	-	1
BP	GO:0010959	regulation of metal ion transport	1/646	19/11595	0.663804383369377	0.954635066384054	gene-LOC122886797	1	LOC122886797	1	gene-LOC122886797	0
BP	GO:0042451	purine nucleoside biosynthetic process	1/646	19/11595	0.663804383369377	0.954635066384054	gene-nme5	1	nme5	1	gene-nme5	0
BP	GO:0042455	ribonucleoside biosynthetic process	1/646	19/11595	0.663804383369377	0.954635066384054	gene-nme5	1	nme5	1	gene-nme5	0
BP	GO:0042476	odontogenesis	1/646	19/11595	0.663804383369377	0.954635066384054	gene-tnca	1	tnca	0	-	1
BP	GO:0046129	purine ribonucleoside biosynthetic process	1/646	19/11595	0.663804383369377	0.954635066384054	gene-nme5	1	nme5	1	gene-nme5	0
BP	GO:0050769	positive regulation of neurogenesis	1/646	19/11595	0.663804383369377	0.954635066384054	gene-znf296	1	znf296	0	-	1
BP	GO:0051924	regulation of calcium ion transport	1/646	19/11595	0.663804383369377	0.954635066384054	gene-LOC122886797	1	LOC122886797	1	gene-LOC122886797	0
BP	GO:0060612	adipose tissue development	1/646	19/11595	0.663804383369377	0.954635066384054	gene-spartb	1	spartb	1	gene-spartb	0
BP	GO:0071248	cellular response to metal ion	1/646	19/11595	0.663804383369377	0.954635066384054	gene-nptx1l	1	nptx1l	1	gene-nptx1l	0
BP	GO:0090307	mitotic spindle assembly	1/646	19/11595	0.663804383369377	0.954635066384054	gene-LOC122877630	1	LOC122877630	1	gene-LOC122877630	0
BP	GO:0106027	neuron projection organization	1/646	19/11595	0.663804383369377	0.954635066384054	gene-si:ch211-278a6.1	1	si:ch211-278a6.1	1	gene-si:ch211-278a6.1	0
BP	GO:0120034	positive regulation of plasma membrane bounded cell projection assembly	1/646	19/11595	0.663804383369377	0.954635066384054	gene-LOC122878127	1	LOC122878127	1	gene-LOC122878127	0
BP	GO:1902414	protein localization to cell junction	1/646	19/11595	0.663804383369377	0.954635066384054	gene-nptx1l	1	nptx1l	1	gene-nptx1l	0
BP	GO:1903708	positive regulation of hemopoiesis	1/646	19/11595	0.663804383369377	0.954635066384054	gene-zbtb46	1	zbtb46	0	-	1
BP	GO:1903047	mitotic cell cycle process	8/646	159/11595	0.667265313924191	0.958061231749786	gene-LOC122877630/gene-LOC122877917/gene-cep126/gene-tacc2/gene-LOC122884209/gene-id2a/gene-LOC122865952/gene-sapcd1	8	cep126/id2a/LOC122865952/LOC122877630/LOC122877917/LOC122884209/sapcd1/tacc2	4	gene-LOC122877630/gene-LOC122877917/gene-sapcd1/gene-tacc2	4
BP	GO:0016570	histone modification	4/646	81/11595	0.668032418458193	0.958061231749786	gene-znf703/gene-snai2/gene-gfi1aa/gene-cbx8a	4	cbx8a/gfi1aa/snai2/znf703	1	gene-gfi1aa	3
BP	GO:0072657	protein localization to membrane	4/646	81/11595	0.668032418458193	0.958061231749786	gene-nptx1l/gene-LOC122878127/gene-LOC122878347/gene-LOC122863926	4	LOC122863926/LOC122878127/LOC122878347/nptx1l	4	gene-LOC122863926/gene-LOC122878127/gene-LOC122878347/gene-nptx1l	0
BP	GO:0007596	blood coagulation	3/646	61/11595	0.668414812848688	0.958061231749786	gene-LOC122875406/gene-p2ry8/gene-serpina10b	3	LOC122875406/p2ry8/serpina10b	3	gene-LOC122875406/gene-p2ry8/gene-serpina10b	0
BP	GO:0009314	response to radiation	5/646	101/11595	0.670021784474906	0.958172048282738	gene-grk1a/gene-LOC122887291/gene-LOC122878127/gene-nyx/gene-snai2	5	grk1a/LOC122878127/LOC122887291/nyx/snai2	4	gene-grk1a/gene-LOC122878127/gene-LOC122887291/gene-nyx	1
BP	GO:0044782	cilium organization	9/646	179/11595	0.672259156739653	0.958172048282738	gene-si:ch211-286b5.4/gene-odad3/gene-znf703/gene-vdac3/gene-cep126/gene-ccdc13/gene-cfap410/gene-fzd2/gene-rpgrb	9	ccdc13/cep126/cfap410/fzd2/odad3/rpgrb/si:ch211-286b5.4/vdac3/znf703	3	gene-ccdc13/gene-si:ch211-286b5.4/gene-vdac3	6
BP	GO:0009123	nucleoside monophosphate metabolic process	2/646	41/11595	0.674565238378412	0.958172048282738	gene-dut/gene-ampd3a	2	ampd3a/dut	0	-	2
BP	GO:0030902	hindbrain development	2/646	41/11595	0.674565238378412	0.958172048282738	gene-znf703/gene-srrm4	2	srrm4/znf703	1	gene-srrm4	1
BP	GO:0043473	pigmentation	2/646	41/11595	0.674565238378412	0.958172048282738	gene-LOC122885551/gene-snai2	2	LOC122885551/snai2	1	gene-LOC122885551	1
BP	GO:0048736	appendage development	2/646	41/11595	0.674565238378412	0.958172048282738	gene-sp8a/gene-itga3b	2	itga3b/sp8a	1	gene-itga3b	1
BP	GO:1901361	organic cyclic compound catabolic process	7/646	141/11595	0.676850280671052	0.958172048282738	gene-dut/gene-LOC122872164/gene-hmox2a/gene-gda/gene-pde4ba/gene-hmox1a/gene-aldh1l2	7	aldh1l2/dut/gda/hmox1a/hmox2a/LOC122872164/pde4ba	4	gene-aldh1l2/gene-gda/gene-hmox1a/gene-LOC122872164	3
BP	GO:0009260	ribonucleotide biosynthetic process	5/646	102/11595	0.678481825934172	0.958172048282738	gene-ampd3a/gene-nme5/gene-LOC122882904/gene-acaca/gene-LOC122869764	5	acaca/ampd3a/LOC122869764/LOC122882904/nme5	3	gene-acaca/gene-LOC122869764/gene-nme5	2
BP	GO:0007599	hemostasis	3/646	62/11595	0.679189398721172	0.958172048282738	gene-LOC122875406/gene-p2ry8/gene-serpina10b	3	LOC122875406/p2ry8/serpina10b	3	gene-LOC122875406/gene-p2ry8/gene-serpina10b	0
BP	GO:0010817	regulation of hormone levels	3/646	62/11595	0.679189398721172	0.958172048282738	gene-gck/gene-dio1/gene-rdh8a	3	dio1/gck/rdh8a	1	gene-gck	2
BP	GO:0043433	negative regulation of DNA-binding transcription factor activity	3/646	62/11595	0.679189398721172	0.958172048282738	gene-LOC122877917/gene-nupr1b/gene-LOC122869242	3	LOC122869242/LOC122877917/nupr1b	3	gene-LOC122869242/gene-LOC122877917/gene-nupr1b	0
BP	GO:0007423	sensory organ development	11/646	219/11595	0.682049119055685	0.958172048282738	gene-znf703/gene-LOC122877917/gene-zgc:162144/gene-crybb1l1/gene-gpc4/gene-sox4b/gene-cryba2b/gene-grhl1/gene-id2a/gene-slc7a14a/gene-rpgrb	11	cryba2b/crybb1l1/gpc4/grhl1/id2a/LOC122877917/rpgrb/slc7a14a/sox4b/zgc:162144/znf703	6	gene-cryba2b/gene-crybb1l1/gene-grhl1/gene-LOC122877917/gene-slc7a14a/gene-zgc:162144	5
BP	GO:0000041	transition metal ion transport	1/646	20/11595	0.682565818091508	0.958172048282738	gene-LOC122868396	1	LOC122868396	1	gene-LOC122868396	0
BP	GO:0001945	lymph vessel development	1/646	20/11595	0.682565818091508	0.958172048282738	gene-vegfc	1	vegfc	0	-	1
BP	GO:0009062	fatty acid catabolic process	1/646	20/11595	0.682565818091508	0.958172048282738	gene-lpin1b	1	lpin1b	1	gene-lpin1b	0
BP	GO:0015718	monocarboxylic acid transport	1/646	20/11595	0.682565818091508	0.958172048282738	gene-LOC122871427	1	LOC122871427	1	gene-LOC122871427	0
BP	GO:0021536	diencephalon development	1/646	20/11595	0.682565818091508	0.958172048282738	gene-ndnf	1	ndnf	0	-	1
BP	GO:0043647	inositol phosphate metabolic process	1/646	20/11595	0.682565818091508	0.958172048282738	gene-itpkcb	1	itpkcb	0	-	1
BP	GO:0046883	regulation of hormone secretion	1/646	20/11595	0.682565818091508	0.958172048282738	gene-gck	1	gck	1	gene-gck	0
BP	GO:0048167	regulation of synaptic plasticity	1/646	20/11595	0.682565818091508	0.958172048282738	gene-syt12	1	syt12	1	gene-syt12	0
BP	GO:0048284	organelle fusion	1/646	20/11595	0.682565818091508	0.958172048282738	gene-mfn1a	1	mfn1a	1	gene-mfn1a	0
BP	GO:0070373	negative regulation of ERK1 and ERK2 cascade	1/646	20/11595	0.682565818091508	0.958172048282738	gene-LOC122877917	1	LOC122877917	1	gene-LOC122877917	0
BP	GO:0071241	cellular response to inorganic substance	1/646	20/11595	0.682565818091508	0.958172048282738	gene-nptx1l	1	nptx1l	1	gene-nptx1l	0
BP	GO:1901659	glycosyl compound biosynthetic process	1/646	20/11595	0.682565818091508	0.958172048282738	gene-nme5	1	nme5	1	gene-nme5	0
BP	GO:0000278	mitotic cell cycle	10/646	200/11595	0.683255373237036	0.958172048282738	gene-LOC122877630/gene-brinp3a.2/gene-LOC122877917/gene-cep126/gene-tacc2/gene-LOC122884209/gene-LOC122887176/gene-id2a/gene-LOC122865952/gene-sapcd1	10	brinp3a.2/cep126/id2a/LOC122865952/LOC122877630/LOC122877917/LOC122884209/LOC122887176/sapcd1/tacc2	4	gene-LOC122877630/gene-LOC122877917/gene-sapcd1/gene-tacc2	6
BP	GO:0009416	response to light stimulus	4/646	83/11595	0.686692625147684	0.958172048282738	gene-grk1a/gene-LOC122887291/gene-LOC122878127/gene-nyx	4	grk1a/LOC122878127/LOC122887291/nyx	4	gene-grk1a/gene-LOC122878127/gene-LOC122887291/gene-nyx	0
BP	GO:0046390	ribose phosphate biosynthetic process	5/646	103/11595	0.686796073765083	0.958172048282738	gene-ampd3a/gene-nme5/gene-LOC122882904/gene-acaca/gene-LOC122869764	5	acaca/ampd3a/LOC122869764/LOC122882904/nme5	3	gene-acaca/gene-LOC122869764/gene-nme5	2
BP	GO:0006956	complement activation	2/646	42/11595	0.687432736965639	0.958172048282738	gene-LOC122873342/gene-LOC122868841	2	LOC122868841/LOC122873342	2	gene-LOC122868841/gene-LOC122873342	0
BP	GO:0030218	erythrocyte differentiation	2/646	42/11595	0.687432736965639	0.958172048282738	gene-kdm6bb/gene-flvcr1	2	flvcr1/kdm6bb	1	gene-flvcr1	1
BP	GO:0033044	regulation of chromosome organization	2/646	42/11595	0.687432736965639	0.958172048282738	gene-znf703/gene-snai2	2	snai2/znf703	0	-	2
BP	GO:0034101	erythrocyte homeostasis	2/646	42/11595	0.687432736965639	0.958172048282738	gene-kdm6bb/gene-flvcr1	2	flvcr1/kdm6bb	1	gene-flvcr1	1
BP	GO:0045165	cell fate commitment	2/646	42/11595	0.687432736965639	0.958172048282738	gene-tmem88a/gene-prdm1b	2	prdm1b/tmem88a	1	gene-prdm1b	1
BP	GO:0090150	establishment of protein localization to membrane	2/646	42/11595	0.687432736965639	0.958172048282738	gene-LOC122878347/gene-LOC122863926	2	LOC122863926/LOC122878347	2	gene-LOC122863926/gene-LOC122878347	0
BP	GO:1903311	regulation of mRNA metabolic process	2/646	42/11595	0.687432736965639	0.958172048282738	gene-LOC122872991/gene-srrm4	2	LOC122872991/srrm4	2	gene-LOC122872991/gene-srrm4	0
BP	GO:0048562	embryonic organ morphogenesis	6/646	123/11595	0.68847983670883	0.958229502169715	gene-skib/gene-znf703/gene-sox4b/gene-fzd2/gene-pthlha/gene-cacna1c	6	cacna1c/fzd2/pthlha/skib/sox4b/znf703	0	-	6
BP	GO:0030001	metal ion transport	3/646	63/11595	0.689702397491923	0.958229502169715	gene-LOC122886797/gene-cacna1g/gene-cacna1c	3	cacna1c/cacna1g/LOC122886797	1	gene-LOC122886797	2
BP	GO:0048706	embryonic skeletal system development	3/646	63/11595	0.689702397491923	0.958229502169715	gene-sulf2a/gene-pthlha/gene-cacna1c	3	cacna1c/pthlha/sulf2a	1	gene-sulf2a	2
BP	GO:0050728	negative regulation of inflammatory response	3/646	63/11595	0.689702397491923	0.958229502169715	gene-metrnlb/gene-LOC122868714/gene-LOC122869242	3	LOC122868714/LOC122869242/metrnlb	2	gene-LOC122869242/gene-metrnlb	1
BP	GO:0016569	covalent chromatin modification	4/646	84/11595	0.695740888910992	0.95999662035198	gene-znf703/gene-snai2/gene-gfi1aa/gene-cbx8a	4	cbx8a/gfi1aa/snai2/znf703	1	gene-gfi1aa	3
BP	GO:0006979	response to oxidative stress	3/646	64/11595	0.699954683003552	0.95999662035198	gene-LOC122877917/gene-cbx8a/gene-nfe2l1a	3	cbx8a/LOC122877917/nfe2l1a	2	gene-LOC122877917/gene-nfe2l1a	1
BP	GO:0050817	coagulation	3/646	64/11595	0.699954683003552	0.95999662035198	gene-LOC122875406/gene-p2ry8/gene-serpina10b	3	LOC122875406/p2ry8/serpina10b	3	gene-LOC122875406/gene-p2ry8/gene-serpina10b	0
BP	GO:0006638	neutral lipid metabolic process	1/646	21/11595	0.700281799215731	0.95999662035198	gene-lpin1b	1	lpin1b	1	gene-lpin1b	0
BP	GO:0006639	acylglycerol metabolic process	1/646	21/11595	0.700281799215731	0.95999662035198	gene-lpin1b	1	lpin1b	1	gene-lpin1b	0
BP	GO:0006641	triglyceride metabolic process	1/646	21/11595	0.700281799215731	0.95999662035198	gene-lpin1b	1	lpin1b	1	gene-lpin1b	0
BP	GO:0007218	neuropeptide signaling pathway	1/646	21/11595	0.700281799215731	0.95999662035198	gene-tac1	1	tac1	1	gene-tac1	0
BP	GO:0009145	purine nucleoside triphosphate biosynthetic process	1/646	21/11595	0.700281799215731	0.95999662035198	gene-nme5	1	nme5	1	gene-nme5	0
BP	GO:0009206	purine ribonucleoside triphosphate biosynthetic process	1/646	21/11595	0.700281799215731	0.95999662035198	gene-nme5	1	nme5	1	gene-nme5	0
BP	GO:0010469	regulation of signaling receptor activity	1/646	21/11595	0.700281799215731	0.95999662035198	gene-nptx1l	1	nptx1l	1	gene-nptx1l	0
BP	GO:0019932	second-messenger-mediated signaling	1/646	21/11595	0.700281799215731	0.95999662035198	gene-rcan1b	1	rcan1b	1	gene-rcan1b	0
BP	GO:0021954	central nervous system neuron development	1/646	21/11595	0.700281799215731	0.95999662035198	gene-ndnf	1	ndnf	0	-	1
BP	GO:0030168	platelet activation	1/646	21/11595	0.700281799215731	0.95999662035198	gene-LOC122875406	1	LOC122875406	1	gene-LOC122875406	0
BP	GO:0035023	regulation of Rho protein signal transduction	1/646	21/11595	0.700281799215731	0.95999662035198	gene-LOC122865952	1	LOC122865952	0	-	1
BP	GO:0038127	ERBB signaling pathway	1/646	21/11595	0.700281799215731	0.95999662035198	gene-wdr54	1	wdr54	0	-	1
BP	GO:0046785	microtubule polymerization	1/646	21/11595	0.700281799215731	0.95999662035198	gene-tppp3	1	tppp3	0	-	1
BP	GO:0007186	G protein-coupled receptor signaling pathway	8/646	164/11595	0.700596949052189	0.95999662035198	gene-grk1a/gene-LOC122864683/gene-LOC122875406/gene-gna14a/gene-LOC122862418/gene-tac1/gene-si:dkey-172j4.3/gene-tafa5a	8	gna14a/grk1a/LOC122862418/LOC122864683/LOC122875406/si:dkey-172j4.3/tac1/tafa5a	6	gene-gna14a/gene-grk1a/gene-LOC122864683/gene-LOC122875406/gene-si:dkey-172j4.3/gene-tac1	2
BP	GO:0034765	regulation of ion transmembrane transport	10/646	203/11595	0.701020787884934	0.95999662035198	gene-LOC122884571/gene-scn1laa/gene-LOC122886797/gene-kcnj15/gene-kcnh5b/gene-LOC122864783/gene-kcng2/gene-kcnj2a/gene-cacna1g/gene-cacna1c	10	cacna1c/cacna1g/kcng2/kcnh5b/kcnj15/kcnj2a/LOC122864783/LOC122884571/LOC122886797/scn1laa	6	gene-kcng2/gene-kcnh5b/gene-kcnj2a/gene-LOC122884571/gene-LOC122886797/gene-scn1laa	4
BP	GO:0006468	protein phosphorylation	6/646	125/11595	0.70333465123219	0.962399045441024	gene-dok7b/gene-LOC122878127/gene-LOC122886518/gene-klhl43/gene-LOC122869123/gene-LOC122871413	6	dok7b/klhl43/LOC122869123/LOC122871413/LOC122878127/LOC122886518	5	gene-klhl43/gene-LOC122869123/gene-LOC122871413/gene-LOC122878127/gene-LOC122886518	1
BP	GO:0016311	dephosphorylation	4/646	85/11595	0.704600936490652	0.963365350368777	gene-swap70a/gene-cttnbp2nla/gene-ppp1r27b/gene-zgc:92242	4	cttnbp2nla/ppp1r27b/swap70a/zgc:92242	2	gene-ppp1r27b/gene-zgc:92242	2
BP	GO:0048762	mesenchymal cell differentiation	3/646	65/11595	0.709947550222129	0.966806769928683	gene-snai1a/gene-snai2/gene-phldb2b	3	phldb2b/snai1a/snai2	0	-	3
BP	GO:0050878	regulation of body fluid levels	3/646	65/11595	0.709947550222129	0.966806769928683	gene-LOC122875406/gene-p2ry8/gene-serpina10b	3	LOC122875406/p2ry8/serpina10b	3	gene-LOC122875406/gene-p2ry8/gene-serpina10b	0
BP	GO:0001932	regulation of protein phosphorylation	5/646	106/11595	0.710857348034583	0.966806769928683	gene-dok7b/gene-LOC122878127/gene-LOC122886518/gene-klhl43/gene-LOC122871413	5	dok7b/klhl43/LOC122871413/LOC122878127/LOC122886518	4	gene-klhl43/gene-LOC122871413/gene-LOC122878127/gene-LOC122886518	1
BP	GO:0048878	chemical homeostasis	7/646	146/11595	0.711556797883747	0.966806769928683	gene-swap70a/gene-nptx1l/gene-gck/gene-LOC122878127/gene-LOC122881776/gene-slc31a2/gene-LOC122868396	7	gck/LOC122868396/LOC122878127/LOC122881776/nptx1l/slc31a2/swap70a	6	gene-gck/gene-LOC122868396/gene-LOC122878127/gene-LOC122881776/gene-nptx1l/gene-slc31a2	1
BP	GO:0043543	protein acylation	2/646	44/11595	0.71191183528522	0.966806769928683	gene-snai2/gene-nupr1b	2	nupr1b/snai2	1	gene-nupr1b	1
BP	GO:0000281	mitotic cytokinesis	1/646	22/11595	0.717010497825256	0.966806769928683	gene-LOC122884209	1	LOC122884209	0	-	1
BP	GO:0006368	transcription elongation from RNA polymerase II promoter	1/646	22/11595	0.717010497825256	0.966806769928683	gene-LOC122880569	1	LOC122880569	1	gene-LOC122880569	0
BP	GO:0007492	endoderm development	1/646	22/11595	0.717010497825256	0.966806769928683	gene-vegfc	1	vegfc	0	-	1
BP	GO:0016573	histone acetylation	1/646	22/11595	0.717010497825256	0.966806769928683	gene-snai2	1	snai2	0	-	1
BP	GO:0031647	regulation of protein stability	1/646	22/11595	0.717010497825256	0.966806769928683	gene-LOC122878127	1	LOC122878127	1	gene-LOC122878127	0
BP	GO:0032388	positive regulation of intracellular transport	1/646	22/11595	0.717010497825256	0.966806769928683	gene-LOC122878127	1	LOC122878127	1	gene-LOC122878127	0
BP	GO:0034968	histone lysine methylation	1/646	22/11595	0.717010497825256	0.966806769928683	gene-gfi1aa	1	gfi1aa	1	gene-gfi1aa	0
BP	GO:0042073	intraciliary transport	1/646	22/11595	0.717010497825256	0.966806769928683	gene-si:ch211-286b5.4	1	si:ch211-286b5.4	1	gene-si:ch211-286b5.4	0
BP	GO:0043112	receptor metabolic process	1/646	22/11595	0.717010497825256	0.966806769928683	gene-wdr54	1	wdr54	0	-	1
BP	GO:0045137	development of primary sexual characteristics	1/646	22/11595	0.717010497825256	0.966806769928683	gene-nupr1b	1	nupr1b	1	gene-nupr1b	0
BP	GO:0061136	regulation of proteasomal protein catabolic process	1/646	22/11595	0.717010497825256	0.966806769928683	gene-nupr1b	1	nupr1b	1	gene-nupr1b	0
BP	GO:2001257	regulation of cation channel activity	1/646	22/11595	0.717010497825256	0.966806769928683	gene-LOC122886797	1	LOC122886797	1	gene-LOC122886797	0
BP	GO:0031400	negative regulation of protein modification process	3/646	66/11595	0.719682682109355	0.966806769928683	gene-swap70a/gene-LOC122886518/gene-klhl43	3	klhl43/LOC122886518/swap70a	2	gene-klhl43/gene-LOC122886518	1
BP	GO:1901222	regulation of NIK/NF-kappaB signaling	3/646	66/11595	0.719682682109355	0.966806769928683	gene-uacab/gene-ifi35/gene-LOC122869242	3	ifi35/LOC122869242/uacab	2	gene-ifi35/gene-LOC122869242	1
BP	GO:0002262	myeloid cell homeostasis	2/646	45/11595	0.723537740978668	0.966806769928683	gene-kdm6bb/gene-flvcr1	2	flvcr1/kdm6bb	1	gene-flvcr1	1
BP	GO:0010948	negative regulation of cell cycle process	2/646	45/11595	0.723537740978668	0.966806769928683	gene-LOC122877917/gene-LOC122865952	2	LOC122865952/LOC122877917	1	gene-LOC122877917	1
BP	GO:1903793	positive regulation of anion transport	2/646	45/11595	0.723537740978668	0.966806769928683	gene-gck/gene-LOC122878127	2	gck/LOC122878127	2	gene-gck/gene-LOC122878127	0
BP	GO:0016042	lipid catabolic process	5/646	108/11595	0.726160161051879	0.966806769928683	gene-neu4/gene-LOC122881246/gene-smpdl3b/gene-lpin1b/gene-plcd3a	5	LOC122881246/lpin1b/neu4/plcd3a/smpdl3b	3	gene-lpin1b/gene-neu4/gene-plcd3a	2
BP	GO:0048705	skeletal system morphogenesis	3/646	67/11595	0.729162117958364	0.966806769928683	gene-gpc4/gene-pthlha/gene-cacna1c	3	cacna1c/gpc4/pthlha	0	-	3
BP	GO:0009893	positive regulation of metabolic process	25/646	497/11595	0.732801525308193	0.966806769928683	gene-tusc2a/gene-tlr3/gene-dok7b/gene-znf703/gene-ddah1/gene-LOC122878127/gene-LOC122877917/gene-otx5/gene-znf296/gene-LOC122880569/gene-LOC122881737/gene-rel/gene-LOC122886528/gene-snai2/gene-LOC122886518/gene-mef2ca/gene-tnca/gene-wbp2/gene-nupr1b/gene-mrtfbb/gene-cbx8a/gene-LOC122871423/gene-dcn/gene-LOC122871413/gene-LOC122872132	25	cbx8a/dcn/ddah1/dok7b/LOC122871413/LOC122871423/LOC122872132/LOC122877917/LOC122878127/LOC122880569/LOC122881737/LOC122886518/LOC122886528/mef2ca/mrtfbb/nupr1b/otx5/rel/snai2/tlr3/tnca/tusc2a/wbp2/znf296/znf703	14	gene-dcn/gene-LOC122871413/gene-LOC122871423/gene-LOC122877917/gene-LOC122878127/gene-LOC122880569/gene-LOC122886518/gene-LOC122886528/gene-mef2ca/gene-nupr1b/gene-otx5/gene-rel/gene-tusc2a/gene-wbp2	11
BP	GO:0001754	eye photoreceptor cell differentiation	1/646	23/11595	0.732806852997198	0.966806769928683	gene-rpgrb	1	rpgrb	0	-	1
BP	GO:0006282	regulation of DNA repair	1/646	23/11595	0.732806852997198	0.966806769928683	gene-cbx8a	1	cbx8a	0	-	1
BP	GO:0006475	internal protein amino acid acetylation	1/646	23/11595	0.732806852997198	0.966806769928683	gene-snai2	1	snai2	0	-	1
BP	GO:0006892	post-Golgi vesicle-mediated transport	1/646	23/11595	0.732806852997198	0.966806769928683	gene-dop1b	1	dop1b	1	gene-dop1b	0
BP	GO:0007093	mitotic cell cycle checkpoint	1/646	23/11595	0.732806852997198	0.966806769928683	gene-id2a	1	id2a	0	-	1
BP	GO:0007127	meiosis I	1/646	23/11595	0.732806852997198	0.966806769928683	gene-terb1	1	terb1	1	gene-terb1	0
BP	GO:0009119	ribonucleoside metabolic process	1/646	23/11595	0.732806852997198	0.966806769928683	gene-nme5	1	nme5	1	gene-nme5	0
BP	GO:0009127	purine nucleoside monophosphate biosynthetic process	1/646	23/11595	0.732806852997198	0.966806769928683	gene-ampd3a	1	ampd3a	0	-	1
BP	GO:0009144	purine nucleoside triphosphate metabolic process	1/646	23/11595	0.732806852997198	0.966806769928683	gene-nme5	1	nme5	1	gene-nme5	0
BP	GO:0009168	purine ribonucleoside monophosphate biosynthetic process	1/646	23/11595	0.732806852997198	0.966806769928683	gene-ampd3a	1	ampd3a	0	-	1
BP	GO:0009205	purine ribonucleoside triphosphate metabolic process	1/646	23/11595	0.732806852997198	0.966806769928683	gene-nme5	1	nme5	1	gene-nme5	0
BP	GO:0018393	internal peptidyl-lysine acetylation	1/646	23/11595	0.732806852997198	0.966806769928683	gene-snai2	1	snai2	0	-	1
BP	GO:0021510	spinal cord development	1/646	23/11595	0.732806852997198	0.966806769928683	gene-pard6gb	1	pard6gb	0	-	1
BP	GO:0035384	thioester biosynthetic process	1/646	23/11595	0.732806852997198	0.966806769928683	gene-acaca	1	acaca	1	gene-acaca	0
BP	GO:0046128	purine ribonucleoside metabolic process	1/646	23/11595	0.732806852997198	0.966806769928683	gene-nme5	1	nme5	1	gene-nme5	0
BP	GO:0070286	axonemal dynein complex assembly	1/646	23/11595	0.732806852997198	0.966806769928683	gene-odad3	1	odad3	0	-	1
BP	GO:0071616	acyl-CoA biosynthetic process	1/646	23/11595	0.732806852997198	0.966806769928683	gene-acaca	1	acaca	1	gene-acaca	0
BP	GO:0072329	monocarboxylic acid catabolic process	1/646	23/11595	0.732806852997198	0.966806769928683	gene-lpin1b	1	lpin1b	1	gene-lpin1b	0
BP	GO:1905475	regulation of protein localization to membrane	1/646	23/11595	0.732806852997198	0.966806769928683	gene-LOC122878127	1	LOC122878127	1	gene-LOC122878127	0
BP	GO:0009894	regulation of catabolic process	5/646	109/11595	0.733590015445191	0.966806769928683	gene-ctns/gene-LOC122886528/gene-nupr1b/gene-dram1/gene-dcn	5	ctns/dcn/dram1/LOC122886528/nupr1b	5	gene-ctns/gene-dcn/gene-dram1/gene-LOC122886528/gene-nupr1b	0
BP	GO:0044242	cellular lipid catabolic process	2/646	46/11595	0.73476490693139	0.966806769928683	gene-smpdl3b/gene-lpin1b	2	lpin1b/smpdl3b	1	gene-lpin1b	1
BP	GO:1901990	regulation of mitotic cell cycle phase transition	2/646	46/11595	0.73476490693139	0.966806769928683	gene-LOC122877917/gene-LOC122865952	2	LOC122865952/LOC122877917	1	gene-LOC122877917	1
BP	GO:0055080	cation homeostasis	4/646	89/11595	0.738164462157208	0.966806769928683	gene-swap70a/gene-LOC122881776/gene-slc31a2/gene-LOC122868396	4	LOC122868396/LOC122881776/slc31a2/swap70a	3	gene-LOC122868396/gene-LOC122881776/gene-slc31a2	1
BP	GO:0098771	inorganic ion homeostasis	4/646	89/11595	0.738164462157208	0.966806769928683	gene-swap70a/gene-LOC122881776/gene-slc31a2/gene-LOC122868396	4	LOC122868396/LOC122881776/slc31a2/swap70a	3	gene-LOC122868396/gene-LOC122881776/gene-slc31a2	1
BP	GO:0043009	chordate embryonic development	10/646	210/11595	0.739991681800827	0.966806769928683	gene-sulf2a/gene-LOC122877917/gene-gpc4/gene-LOC122888062/gene-pard6gb/gene-LOC122869123/gene-rundc1/gene-mrtfbb/gene-pthlha/gene-cacna1c	10	cacna1c/gpc4/LOC122869123/LOC122877917/LOC122888062/mrtfbb/pard6gb/pthlha/rundc1/sulf2a	5	gene-LOC122869123/gene-LOC122877917/gene-LOC122888062/gene-rundc1/gene-sulf2a	5
BP	GO:0042325	regulation of phosphorylation	6/646	131/11595	0.7449814630627	0.966806769928683	gene-dok7b/gene-LOC122878127/gene-LOC122886518/gene-klhl43/gene-nupr1b/gene-LOC122871413	6	dok7b/klhl43/LOC122871413/LOC122878127/LOC122886518/nupr1b	5	gene-klhl43/gene-LOC122871413/gene-LOC122878127/gene-LOC122886518/gene-nupr1b	1
BP	GO:1901615	organic hydroxy compound metabolic process	6/646	131/11595	0.7449814630627	0.966806769928683	gene-itpkcb/gene-ddc/gene-snai2/gene-LOC122888177/gene-nfe2l1a/gene-LOC122871599	6	ddc/itpkcb/LOC122871599/LOC122888177/nfe2l1a/snai2	3	gene-ddc/gene-LOC122871599/gene-nfe2l1a	3
BP	GO:0009792	embryo development ending in birth or egg hatching	10/646	211/11595	0.745270085152762	0.966806769928683	gene-sulf2a/gene-LOC122877917/gene-gpc4/gene-LOC122888062/gene-pard6gb/gene-LOC122869123/gene-rundc1/gene-mrtfbb/gene-pthlha/gene-cacna1c	10	cacna1c/gpc4/LOC122869123/LOC122877917/LOC122888062/mrtfbb/pard6gb/pthlha/rundc1/sulf2a	5	gene-LOC122869123/gene-LOC122877917/gene-LOC122888062/gene-rundc1/gene-sulf2a	5
BP	GO:0051052	regulation of DNA metabolic process	2/646	47/11595	0.745601599395123	0.966806769928683	gene-LOC122877917/gene-cbx8a	2	cbx8a/LOC122877917	1	gene-LOC122877917	1
BP	GO:0055123	digestive system development	2/646	47/11595	0.745601599395123	0.966806769928683	gene-lnx2b/gene-pard6gb	2	lnx2b/pard6gb	0	-	2
BP	GO:0000226	microtubule cytoskeleton organization	11/646	231/11595	0.746807474997773	0.966806769928683	gene-tppp3/gene-map1aa/gene-si:ch211-286b5.4/gene-odad3/gene-map1ab/gene-LOC122877630/gene-cep126/gene-tacc2/gene-ccdc13/gene-phldb2b/gene-sapcd1	11	ccdc13/cep126/LOC122877630/map1aa/map1ab/odad3/phldb2b/sapcd1/si:ch211-286b5.4/tacc2/tppp3	6	gene-ccdc13/gene-LOC122877630/gene-map1aa/gene-sapcd1/gene-si:ch211-286b5.4/gene-tacc2	5
BP	GO:0002831	regulation of response to biotic stimulus	3/646	69/11595	0.747363660550308	0.966806769928683	gene-LOC122878212/gene-ifi35/gene-LOC122869242	3	ifi35/LOC122869242/LOC122878212	3	gene-ifi35/gene-LOC122869242/gene-LOC122878212	0
BP	GO:0031348	negative regulation of defense response	3/646	69/11595	0.747363660550308	0.966806769928683	gene-metrnlb/gene-LOC122868714/gene-LOC122869242	3	LOC122868714/LOC122869242/metrnlb	2	gene-LOC122869242/gene-metrnlb	1
BP	GO:0032496	response to lipopolysaccharide	3/646	69/11595	0.747363660550308	0.966806769928683	gene-cmpk2/gene-LOC122868820/gene-LOC122869242	3	cmpk2/LOC122868820/LOC122869242	2	gene-cmpk2/gene-LOC122869242	1
BP	GO:0006109	regulation of carbohydrate metabolic process	1/646	24/11595	0.747722751110213	0.966806769928683	gene-nupr1b	1	nupr1b	1	gene-nupr1b	0
BP	GO:0006941	striated muscle contraction	1/646	24/11595	0.747722751110213	0.966806769928683	gene-nkx2.5	1	nkx2.5	0	-	1
BP	GO:0018022	peptidyl-lysine methylation	1/646	24/11595	0.747722751110213	0.966806769928683	gene-gfi1aa	1	gfi1aa	1	gene-gfi1aa	0
BP	GO:0022037	metencephalon development	1/646	24/11595	0.747722751110213	0.966806769928683	gene-srrm4	1	srrm4	1	gene-srrm4	0
BP	GO:0030100	regulation of endocytosis	1/646	24/11595	0.747722751110213	0.966806769928683	gene-wdr54	1	wdr54	0	-	1
BP	GO:0031330	negative regulation of cellular catabolic process	1/646	24/11595	0.747722751110213	0.966806769928683	gene-nupr1b	1	nupr1b	1	gene-nupr1b	0
BP	GO:0032465	regulation of cytokinesis	1/646	24/11595	0.747722751110213	0.966806769928683	gene-si:ch211-63p21.8	1	si:ch211-63p21.8	1	gene-si:ch211-63p21.8	0
BP	GO:0042558	pteridine-containing compound metabolic process	1/646	24/11595	0.747722751110213	0.966806769928683	gene-aldh1l2	1	aldh1l2	1	gene-aldh1l2	0
BP	GO:0048884	neuromast development	1/646	24/11595	0.747722751110213	0.966806769928683	gene-gpc4	1	gpc4	0	-	1
BP	GO:0098840	protein transport along microtubule	1/646	24/11595	0.747722751110213	0.966806769928683	gene-si:ch211-286b5.4	1	si:ch211-286b5.4	1	gene-si:ch211-286b5.4	0
BP	GO:0099118	microtubule-based protein transport	1/646	24/11595	0.747722751110213	0.966806769928683	gene-si:ch211-286b5.4	1	si:ch211-286b5.4	1	gene-si:ch211-286b5.4	0
BP	GO:1903050	regulation of proteolysis involved in cellular protein catabolic process	1/646	24/11595	0.747722751110213	0.966806769928683	gene-nupr1b	1	nupr1b	1	gene-nupr1b	0
BP	GO:1902532	negative regulation of intracellular signal transduction	6/646	132/11595	0.751495751279449	0.966806769928683	gene-LOC122874995/gene-LOC122877917/gene-snai2/gene-klhl43/gene-ifi35/gene-LOC122869242	6	ifi35/klhl43/LOC122869242/LOC122874995/LOC122877917/snai2	5	gene-ifi35/gene-klhl43/gene-LOC122869242/gene-LOC122874995/gene-LOC122877917	1
BP	GO:0006812	cation transport	7/646	153/11595	0.755804763783548	0.966806769928683	gene-LOC122870126/gene-LOC122878896/gene-LOC122886797/gene-cacna1g/gene-LOC122868396/gene-cacna1c/gene-slc13a4	7	cacna1c/cacna1g/LOC122868396/LOC122870126/LOC122878896/LOC122886797/slc13a4	5	gene-LOC122868396/gene-LOC122870126/gene-LOC122878896/gene-LOC122886797/gene-slc13a4	2
BP	GO:0002064	epithelial cell development	2/646	48/11595	0.75605640212278	0.966806769928683	gene-LOC122870658/gene-LOC122865952	2	LOC122865952/LOC122870658	1	gene-LOC122870658	1
BP	GO:0006959	humoral immune response	2/646	48/11595	0.75605640212278	0.966806769928683	gene-LOC122873342/gene-LOC122868841	2	LOC122868841/LOC122873342	2	gene-LOC122868841/gene-LOC122873342	0
BP	GO:0009581	detection of external stimulus	2/646	48/11595	0.75605640212278	0.966806769928683	gene-grk1a/gene-LOC122887291	2	grk1a/LOC122887291	2	gene-grk1a/gene-LOC122887291	0
BP	GO:0009582	detection of abiotic stimulus	2/646	48/11595	0.75605640212278	0.966806769928683	gene-grk1a/gene-LOC122887291	2	grk1a/LOC122887291	2	gene-grk1a/gene-LOC122887291	0
BP	GO:0035150	regulation of tube size	2/646	48/11595	0.75605640212278	0.966806769928683	gene-LOC122863516/gene-edn1	2	edn1/LOC122863516	0	-	2
BP	GO:0035296	regulation of tube diameter	2/646	48/11595	0.75605640212278	0.966806769928683	gene-LOC122863516/gene-edn1	2	edn1/LOC122863516	0	-	2
BP	GO:0097746	blood vessel diameter maintenance	2/646	48/11595	0.75605640212278	0.966806769928683	gene-LOC122863516/gene-edn1	2	edn1/LOC122863516	0	-	2
BP	GO:0007017	microtubule-based process	20/646	408/11595	0.756444362062929	0.966806769928683	gene-tppp3/gene-map1aa/gene-kif28/gene-si:ch211-286b5.4/gene-odad3/gene-map1ab/gene-kif21a/gene-dnah10/gene-LOC122877630/gene-cep126/gene-dnah12/gene-tacc2/gene-LOC122886528/gene-ccdc13/gene-kif1ab/gene-kif26bb/gene-LOC122863271/gene-phldb2b/gene-sapcd1/gene-rpgrb	20	ccdc13/cep126/dnah10/dnah12/kif1ab/kif21a/kif26bb/kif28/LOC122863271/LOC122877630/LOC122886528/map1aa/map1ab/odad3/phldb2b/rpgrb/sapcd1/si:ch211-286b5.4/tacc2/tppp3	14	gene-ccdc13/gene-dnah10/gene-dnah12/gene-kif1ab/gene-kif21a/gene-kif26bb/gene-kif28/gene-LOC122863271/gene-LOC122877630/gene-LOC122886528/gene-map1aa/gene-sapcd1/gene-si:ch211-286b5.4/gene-tacc2	6
BP	GO:0000077	DNA damage checkpoint	1/646	25/11595	0.761807195219002	0.966806769928683	gene-id2a	1	id2a	0	-	1
BP	GO:0001756	somitogenesis	1/646	25/11595	0.761807195219002	0.966806769928683	gene-LOC122869123	1	LOC122869123	1	gene-LOC122869123	0
BP	GO:0002791	regulation of peptide secretion	1/646	25/11595	0.761807195219002	0.966806769928683	gene-gck	1	gck	1	gene-gck	0
BP	GO:0007286	spermatid development	1/646	25/11595	0.761807195219002	0.966806769928683	gene-odad2	1	odad2	0	-	1
BP	GO:0008217	regulation of blood pressure	1/646	25/11595	0.761807195219002	0.966806769928683	gene-LOC122878127	1	LOC122878127	1	gene-LOC122878127	0
BP	GO:0009914	hormone transport	1/646	25/11595	0.761807195219002	0.966806769928683	gene-gck	1	gck	1	gene-gck	0
BP	GO:0017148	negative regulation of translation	1/646	25/11595	0.761807195219002	0.966806769928683	gene-caprin2	1	caprin2	1	gene-caprin2	0
BP	GO:0031640	killing of cells of other organism	1/646	25/11595	0.761807195219002	0.966806769928683	gene-tusc2a	1	tusc2a	1	gene-tusc2a	0
BP	GO:0034249	negative regulation of cellular amide metabolic process	1/646	25/11595	0.761807195219002	0.966806769928683	gene-caprin2	1	caprin2	1	gene-caprin2	0
BP	GO:0046173	polyol biosynthetic process	1/646	25/11595	0.761807195219002	0.966806769928683	gene-itpkcb	1	itpkcb	0	-	1
BP	GO:0046879	hormone secretion	1/646	25/11595	0.761807195219002	0.966806769928683	gene-gck	1	gck	1	gene-gck	0
BP	GO:0048515	spermatid differentiation	1/646	25/11595	0.761807195219002	0.966806769928683	gene-odad2	1	odad2	0	-	1
BP	GO:0050708	regulation of protein secretion	1/646	25/11595	0.761807195219002	0.966806769928683	gene-gck	1	gck	1	gene-gck	0
BP	GO:0051403	stress-activated MAPK cascade	1/646	25/11595	0.761807195219002	0.966806769928683	gene-klhl43	1	klhl43	1	gene-klhl43	0
BP	GO:0061515	myeloid cell development	1/646	25/11595	0.761807195219002	0.966806769928683	gene-LOC122869123	1	LOC122869123	1	gene-LOC122869123	0
BP	GO:0061640	cytoskeleton-dependent cytokinesis	1/646	25/11595	0.761807195219002	0.966806769928683	gene-LOC122884209	1	LOC122884209	0	-	1
BP	GO:0001818	negative regulation of cytokine production	3/646	71/11595	0.7645745067849	0.966806769928683	gene-tusc2a/gene-LOC122877917/gene-LOC122869242	3	LOC122869242/LOC122877917/tusc2a	3	gene-LOC122869242/gene-LOC122877917/gene-tusc2a	0
BP	GO:0038061	NIK/NF-kappaB signaling	3/646	71/11595	0.7645745067849	0.966806769928683	gene-uacab/gene-ifi35/gene-LOC122869242	3	ifi35/LOC122869242/uacab	2	gene-ifi35/gene-LOC122869242	1
BP	GO:0000910	cytokinesis	2/646	49/11595	0.766138155472555	0.966806769928683	gene-LOC122884209/gene-si:ch211-63p21.8	2	LOC122884209/si:ch211-63p21.8	1	gene-si:ch211-63p21.8	1
BP	GO:0002532	production of molecular mediator involved in inflammatory response	2/646	49/11595	0.766138155472555	0.966806769928683	gene-LOC122869242/gene-LOC122872132	2	LOC122869242/LOC122872132	1	gene-LOC122869242	1
BP	GO:0002534	cytokine production involved in inflammatory response	2/646	49/11595	0.766138155472555	0.966806769928683	gene-LOC122869242/gene-LOC122872132	2	LOC122869242/LOC122872132	1	gene-LOC122869242	1
BP	GO:0045765	regulation of angiogenesis	2/646	49/11595	0.766138155472555	0.966806769928683	gene-LOC122877917/gene-tafa5a	2	LOC122877917/tafa5a	1	gene-LOC122877917	1
BP	GO:0048793	pronephros development	2/646	49/11595	0.766138155472555	0.966806769928683	gene-LOC122888062/gene-pard6gb	2	LOC122888062/pard6gb	1	gene-LOC122888062	1
BP	GO:1900015	regulation of cytokine production involved in inflammatory response	2/646	49/11595	0.766138155472555	0.966806769928683	gene-LOC122869242/gene-LOC122872132	2	LOC122869242/LOC122872132	1	gene-LOC122869242	1
BP	GO:0050801	ion homeostasis	4/646	93/11595	0.768765400884504	0.967008804510759	gene-swap70a/gene-LOC122881776/gene-slc31a2/gene-LOC122868396	4	LOC122868396/LOC122881776/slc31a2/swap70a	3	gene-LOC122868396/gene-LOC122881776/gene-slc31a2	1
BP	GO:0008277	regulation of G protein-coupled receptor signaling pathway	1/646	26/11595	0.77510646504515	0.967008804510759	gene-grk1a	1	grk1a	1	gene-grk1a	0
BP	GO:0009126	purine nucleoside monophosphate metabolic process	1/646	26/11595	0.77510646504515	0.967008804510759	gene-ampd3a	1	ampd3a	0	-	1
BP	GO:0009167	purine ribonucleoside monophosphate metabolic process	1/646	26/11595	0.77510646504515	0.967008804510759	gene-ampd3a	1	ampd3a	0	-	1
BP	GO:0009895	negative regulation of catabolic process	1/646	26/11595	0.77510646504515	0.967008804510759	gene-nupr1b	1	nupr1b	1	gene-nupr1b	0
BP	GO:0016571	histone methylation	1/646	26/11595	0.77510646504515	0.967008804510759	gene-gfi1aa	1	gfi1aa	1	gene-gfi1aa	0
BP	GO:0022898	regulation of transmembrane transporter activity	1/646	26/11595	0.77510646504515	0.967008804510759	gene-LOC122886797	1	LOC122886797	1	gene-LOC122886797	0
BP	GO:0032412	regulation of ion transmembrane transporter activity	1/646	26/11595	0.77510646504515	0.967008804510759	gene-LOC122886797	1	LOC122886797	1	gene-LOC122886797	0
BP	GO:0042461	photoreceptor cell development	1/646	26/11595	0.77510646504515	0.967008804510759	gene-rpgrb	1	rpgrb	0	-	1
BP	GO:0043094	cellular metabolic compound salvage	1/646	26/11595	0.77510646504515	0.967008804510759	gene-ampd3a	1	ampd3a	0	-	1
BP	GO:0061982	meiosis I cell cycle process	1/646	26/11595	0.77510646504515	0.967008804510759	gene-terb1	1	terb1	1	gene-terb1	0
BP	GO:0072175	epithelial tube formation	1/646	26/11595	0.77510646504515	0.967008804510759	gene-pard6gb	1	pard6gb	0	-	1
BP	GO:1902600	proton transmembrane transport	1/646	26/11595	0.77510646504515	0.967008804510759	gene-LOC122870126	1	LOC122870126	1	gene-LOC122870126	0
BP	GO:1903362	regulation of cellular protein catabolic process	1/646	26/11595	0.77510646504515	0.967008804510759	gene-nupr1b	1	nupr1b	1	gene-nupr1b	0
BP	GO:0014067	negative regulation of phosphatidylinositol 3-kinase signaling	2/646	50/11595	0.775855901293516	0.967008804510759	gene-LOC122877917/gene-LOC122869242	2	LOC122869242/LOC122877917	2	gene-LOC122869242/gene-LOC122877917	0
BP	GO:0043270	positive regulation of ion transport	2/646	50/11595	0.775855901293516	0.967008804510759	gene-gck/gene-LOC122878127	2	gck/LOC122878127	2	gene-gck/gene-LOC122878127	0
BP	GO:1903530	regulation of secretion by cell	2/646	50/11595	0.775855901293516	0.967008804510759	gene-syt12/gene-gck	2	gck/syt12	2	gene-gck/gene-syt12	0
BP	GO:0032259	methylation	7/646	157/11595	0.778801901306381	0.969977748187527	gene-LOC122876938/gene-pmt/gene-gfi1aa/gene-gnmt/gene-asmt2/gene-prdm1b/gene-eef2kmt	7	asmt2/eef2kmt/gfi1aa/gnmt/LOC122876938/pmt/prdm1b	5	gene-gfi1aa/gene-gnmt/gene-LOC122876938/gene-pmt/gene-prdm1b	2
BP	GO:0060341	regulation of cellular localization	3/646	73/11595	0.780820900891433	0.971170280385547	gene-LOC122877630/gene-LOC122878127/gene-sapcd1	3	LOC122877630/LOC122878127/sapcd1	3	gene-LOC122877630/gene-LOC122878127/gene-sapcd1	0
BP	GO:0040008	regulation of growth	4/646	95/11595	0.782982131897386	0.971170280385547	gene-omgb/gene-znf296/gene-spartb/gene-pard6gb	4	omgb/pard6gb/spartb/znf296	2	gene-omgb/gene-spartb	2
BP	GO:0006839	mitochondrial transport	2/646	51/11595	0.785218833139115	0.971170280385547	gene-nptx1l/gene-LOC122888793	2	LOC122888793/nptx1l	2	gene-LOC122888793/gene-nptx1l	0
BP	GO:0030705	cytoskeleton-dependent intracellular transport	2/646	51/11595	0.785218833139115	0.971170280385547	gene-si:ch211-286b5.4/gene-LOC122886528	2	LOC122886528/si:ch211-286b5.4	2	gene-LOC122886528/gene-si:ch211-286b5.4	0
BP	GO:0006354	DNA-templated transcription, elongation	1/646	27/11595	0.787664268103394	0.971170280385547	gene-LOC122880569	1	LOC122880569	1	gene-LOC122880569	0
BP	GO:0006865	amino acid transport	1/646	27/11595	0.787664268103394	0.971170280385547	gene-slc7a5	1	slc7a5	1	gene-slc7a5	0
BP	GO:0006874	cellular calcium ion homeostasis	1/646	27/11595	0.787664268103394	0.971170280385547	gene-swap70a	1	swap70a	0	-	1
BP	GO:0006986	response to unfolded protein	1/646	27/11595	0.787664268103394	0.971170280385547	gene-LOC122878127	1	LOC122878127	1	gene-LOC122878127	0
BP	GO:0031098	stress-activated protein kinase signaling cascade	1/646	27/11595	0.787664268103394	0.971170280385547	gene-klhl43	1	klhl43	1	gene-klhl43	0
BP	GO:0031570	DNA integrity checkpoint	1/646	27/11595	0.787664268103394	0.971170280385547	gene-id2a	1	id2a	0	-	1
BP	GO:0033157	regulation of intracellular protein transport	1/646	27/11595	0.787664268103394	0.971170280385547	gene-LOC122878127	1	LOC122878127	1	gene-LOC122878127	0
BP	GO:0046942	carboxylic acid transport	1/646	27/11595	0.787664268103394	0.971170280385547	gene-LOC122871427	1	LOC122871427	1	gene-LOC122871427	0
BP	GO:0048477	oogenesis	1/646	27/11595	0.787664268103394	0.971170280385547	gene-tdrd6	1	tdrd6	1	gene-tdrd6	0
BP	GO:0070588	calcium ion transmembrane transport	1/646	27/11595	0.787664268103394	0.971170280385547	gene-LOC122886797	1	LOC122886797	1	gene-LOC122886797	0
BP	GO:0002237	response to molecule of bacterial origin	3/646	74/11595	0.788591510007191	0.971617046713732	gene-cmpk2/gene-LOC122868820/gene-LOC122869242	3	cmpk2/LOC122868820/LOC122869242	2	gene-cmpk2/gene-LOC122869242	1
BP	GO:0003341	cilium movement	2/646	52/11595	0.794236251387501	0.974679302021679	gene-odad3/gene-rpgrb	2	odad3/rpgrb	0	-	2
BP	GO:0007605	sensory perception of sound	2/646	52/11595	0.794236251387501	0.974679302021679	gene-snai2/gene-myo15b	2	myo15b/snai2	1	gene-myo15b	1
BP	GO:0015849	organic acid transport	2/646	52/11595	0.794236251387501	0.974679302021679	gene-slc7a5/gene-LOC122871427	2	LOC122871427/slc7a5	2	gene-LOC122871427/gene-slc7a5	0
BP	GO:0051046	regulation of secretion	2/646	52/11595	0.794236251387501	0.974679302021679	gene-syt12/gene-gck	2	gck/syt12	2	gene-gck/gene-syt12	0
BP	GO:1901342	regulation of vasculature development	2/646	52/11595	0.794236251387501	0.974679302021679	gene-LOC122877917/gene-tafa5a	2	LOC122877917/tafa5a	1	gene-LOC122877917	1
BP	GO:0022402	cell cycle process	14/646	301/11595	0.794476965950229	0.974679302021679	gene-si:ch211-286b5.4/gene-terb1/gene-LOC122877630/gene-brinp3a.2/gene-LOC122877917/gene-cep126/gene-tacc2/gene-LOC122884209/gene-LOC122887176/gene-id2a/gene-LOC122865952/gene-LOC122868820/gene-si:ch211-63p21.8/gene-sapcd1	14	brinp3a.2/cep126/id2a/LOC122865952/LOC122868820/LOC122877630/LOC122877917/LOC122884209/LOC122887176/sapcd1/si:ch211-286b5.4/si:ch211-63p21.8/tacc2/terb1	7	gene-LOC122877630/gene-LOC122877917/gene-sapcd1/gene-si:ch211-286b5.4/gene-si:ch211-63p21.8/gene-tacc2/gene-terb1	7
BP	GO:0051049	regulation of transport	15/646	321/11595	0.795351135982502	0.974908307447587	gene-LOC122884571/gene-cttnbp2nla/gene-syt12/gene-wdr54/gene-gck/gene-LOC122878127/gene-scn1laa/gene-LOC122886797/gene-kcnj15/gene-kcnh5b/gene-LOC122864783/gene-kcng2/gene-kcnj2a/gene-cacna1g/gene-cacna1c	15	cacna1c/cacna1g/cttnbp2nla/gck/kcng2/kcnh5b/kcnj15/kcnj2a/LOC122864783/LOC122878127/LOC122884571/LOC122886797/scn1laa/syt12/wdr54	9	gene-gck/gene-kcng2/gene-kcnh5b/gene-kcnj2a/gene-LOC122878127/gene-LOC122884571/gene-LOC122886797/gene-scn1laa/gene-syt12	6
BP	GO:0033554	cellular response to stress	22/646	458/11595	0.795797246311867	0.974908307447587	gene-eya2/gene-ddit3/gene-LOC122878127/gene-LOC122877917/gene-omgb/gene-macrod1/gene-LOC122881737/gene-ccdc13/gene-snai2/gene-cfap410/gene-LOC122886518/gene-id2a/gene-eif2ak3/gene-klhl43/gene-tnca/gene-swi5/gene-nupr1b/gene-LOC122868820/gene-cbx8a/gene-nfe2l1a/gene-LOC122871826/gene-nhej1	22	cbx8a/ccdc13/cfap410/ddit3/eif2ak3/eya2/id2a/klhl43/LOC122868820/LOC122871826/LOC122877917/LOC122878127/LOC122881737/LOC122886518/macrod1/nfe2l1a/nhej1/nupr1b/omgb/snai2/swi5/tnca	11	gene-ccdc13/gene-ddit3/gene-eif2ak3/gene-klhl43/gene-LOC122877917/gene-LOC122878127/gene-LOC122886518/gene-macrod1/gene-nfe2l1a/gene-nupr1b/gene-omgb	11
BP	GO:0009201	ribonucleoside triphosphate biosynthetic process	1/646	28/11595	0.799521882453775	0.976688663224782	gene-nme5	1	nme5	1	gene-nme5	0
BP	GO:0034754	cellular hormone metabolic process	1/646	28/11595	0.799521882453775	0.976688663224782	gene-rdh8a	1	rdh8a	0	-	1
BP	GO:0035148	tube formation	1/646	28/11595	0.799521882453775	0.976688663224782	gene-pard6gb	1	pard6gb	0	-	1
BP	GO:0140013	meiotic nuclear division	1/646	28/11595	0.799521882453775	0.976688663224782	gene-terb1	1	terb1	1	gene-terb1	0
BP	GO:0048701	embryonic cranial skeleton morphogenesis	2/646	53/11595	0.802917522877797	0.9787033066151	gene-pthlha/gene-cacna1c	2	cacna1c/pthlha	0	-	2
BP	GO:0048704	embryonic skeletal system morphogenesis	2/646	53/11595	0.802917522877797	0.9787033066151	gene-pthlha/gene-cacna1c	2	cacna1c/pthlha	0	-	2
BP	GO:1901987	regulation of cell cycle phase transition	2/646	53/11595	0.802917522877797	0.9787033066151	gene-LOC122877917/gene-LOC122865952	2	LOC122865952/LOC122877917	1	gene-LOC122877917	1
BP	GO:0007283	spermatogenesis	3/646	76/11595	0.803447133104954	0.9787033066151	gene-tdrd6/gene-LOC122865494/gene-odad2	3	LOC122865494/odad2/tdrd6	2	gene-LOC122865494/gene-tdrd6	1
BP	GO:0007417	central nervous system development	10/646	224/11595	0.807263664417194	0.979219590795444	gene-LOC122873501/gene-reln/gene-rfx4/gene-znf703/gene-srrm4/gene-ndnf/gene-omgb/gene-pard6gb/gene-trim69/gene-mrtfbb	10	LOC122873501/mrtfbb/ndnf/omgb/pard6gb/reln/rfx4/srrm4/trim69/znf703	4	gene-omgb/gene-rfx4/gene-srrm4/gene-trim69	6
BP	GO:0090596	sensory organ morphogenesis	4/646	99/11595	0.809324152199626	0.979219590795444	gene-znf703/gene-sox4b/gene-id2a/gene-rpgrb	4	id2a/rpgrb/sox4b/znf703	0	-	4
BP	GO:0006099	tricarboxylic acid cycle	1/646	29/11595	0.810718291542983	0.979219590795444	gene-LOC122882574	1	LOC122882574	1	gene-LOC122882574	0
BP	GO:0007548	sex differentiation	1/646	29/11595	0.810718291542983	0.979219590795444	gene-nupr1b	1	nupr1b	1	gene-nupr1b	0
BP	GO:0033866	nucleoside bisphosphate biosynthetic process	1/646	29/11595	0.810718291542983	0.979219590795444	gene-acaca	1	acaca	1	gene-acaca	0
BP	GO:0034030	ribonucleoside bisphosphate biosynthetic process	1/646	29/11595	0.810718291542983	0.979219590795444	gene-acaca	1	acaca	1	gene-acaca	0
BP	GO:0034033	purine nucleoside bisphosphate biosynthetic process	1/646	29/11595	0.810718291542983	0.979219590795444	gene-acaca	1	acaca	1	gene-acaca	0
BP	GO:0060173	limb development	1/646	29/11595	0.810718291542983	0.979219590795444	gene-sp8a	1	sp8a	0	-	1
BP	GO:0072503	cellular divalent inorganic cation homeostasis	1/646	29/11595	0.810718291542983	0.979219590795444	gene-swap70a	1	swap70a	0	-	1
BP	GO:1903037	regulation of leukocyte cell-cell adhesion	1/646	29/11595	0.810718291542983	0.979219590795444	gene-LOC122877917	1	LOC122877917	1	gene-LOC122877917	0
BP	GO:1904062	regulation of cation transmembrane transport	1/646	29/11595	0.810718291542983	0.979219590795444	gene-LOC122886797	1	LOC122886797	1	gene-LOC122886797	0
BP	GO:0048147	negative regulation of fibroblast proliferation	2/646	54/11595	0.811272044699714	0.979219590795444	gene-nupr1b/gene-LOC122869242	2	LOC122869242/nupr1b	2	gene-LOC122869242/gene-nupr1b	0
BP	GO:0050954	sensory perception of mechanical stimulus	2/646	54/11595	0.811272044699714	0.979219590795444	gene-snai2/gene-myo15b	2	myo15b/snai2	1	gene-myo15b	1
BP	GO:0016051	carbohydrate biosynthetic process	2/646	55/11595	0.819309211800184	0.985777624497539	gene-gpia/gene-pck2	2	gpia/pck2	2	gene-gpia/gene-pck2	0
BP	GO:0006974	cellular response to DNA damage stimulus	14/646	308/11595	0.82050324504541	0.985777624497539	gene-eya2/gene-LOC122878127/gene-macrod1/gene-LOC122881737/gene-ccdc13/gene-snai2/gene-cfap410/gene-id2a/gene-swi5/gene-nupr1b/gene-LOC122868820/gene-cbx8a/gene-LOC122871826/gene-nhej1	14	cbx8a/ccdc13/cfap410/eya2/id2a/LOC122868820/LOC122871826/LOC122878127/LOC122881737/macrod1/nhej1/nupr1b/snai2/swi5	4	gene-ccdc13/gene-LOC122878127/gene-macrod1/gene-nupr1b	10
BP	GO:0006937	regulation of muscle contraction	1/646	30/11595	0.821290311572659	0.985777624497539	gene-tnnt1	1	tnnt1	1	gene-tnnt1	0
BP	GO:0008037	cell recognition	1/646	30/11595	0.821290311572659	0.985777624497539	gene-LOC122888546	1	LOC122888546	0	-	1
BP	GO:0009199	ribonucleoside triphosphate metabolic process	1/646	30/11595	0.821290311572659	0.985777624497539	gene-nme5	1	nme5	1	gene-nme5	0
BP	GO:0035966	response to topologically incorrect protein	1/646	30/11595	0.821290311572659	0.985777624497539	gene-LOC122878127	1	LOC122878127	1	gene-LOC122878127	0
BP	GO:0045787	positive regulation of cell cycle	1/646	30/11595	0.821290311572659	0.985777624497539	gene-nupr1b	1	nupr1b	1	gene-nupr1b	0
BP	GO:0055074	calcium ion homeostasis	1/646	30/11595	0.821290311572659	0.985777624497539	gene-swap70a	1	swap70a	0	-	1
BP	GO:0007517	muscle organ development	3/646	79/11595	0.824079022607284	0.987746284936953	gene-lrrc39/gene-nupr1b/gene-mrtfbb	3	lrrc39/mrtfbb/nupr1b	2	gene-lrrc39/gene-nupr1b	1
BP	GO:0048232	male gamete generation	3/646	79/11595	0.824079022607284	0.987746284936953	gene-tdrd6/gene-LOC122865494/gene-odad2	3	LOC122865494/odad2/tdrd6	2	gene-LOC122865494/gene-tdrd6	1
BP	GO:0010604	positive regulation of macromolecule metabolic process	22/646	468/11595	0.826031451662546	0.987851408002536	gene-tusc2a/gene-tlr3/gene-dok7b/gene-znf703/gene-LOC122878127/gene-LOC122877917/gene-otx5/gene-znf296/gene-LOC122880569/gene-LOC122881737/gene-rel/gene-snai2/gene-LOC122886518/gene-mef2ca/gene-tnca/gene-wbp2/gene-nupr1b/gene-mrtfbb/gene-cbx8a/gene-LOC122871423/gene-LOC122871413/gene-LOC122872132	22	cbx8a/dok7b/LOC122871413/LOC122871423/LOC122872132/LOC122877917/LOC122878127/LOC122880569/LOC122881737/LOC122886518/mef2ca/mrtfbb/nupr1b/otx5/rel/snai2/tlr3/tnca/tusc2a/wbp2/znf296/znf703	12	gene-LOC122871413/gene-LOC122871423/gene-LOC122877917/gene-LOC122878127/gene-LOC122880569/gene-LOC122886518/gene-mef2ca/gene-nupr1b/gene-otx5/gene-rel/gene-tusc2a/gene-wbp2	10
BP	GO:0045088	regulation of innate immune response	2/646	56/11595	0.827038388095147	0.987851408002536	gene-ifi35/gene-LOC122869242	2	ifi35/LOC122869242	2	gene-ifi35/gene-LOC122869242	0
BP	GO:0048144	fibroblast proliferation	2/646	56/11595	0.827038388095147	0.987851408002536	gene-nupr1b/gene-LOC122869242	2	LOC122869242/nupr1b	2	gene-LOC122869242/gene-nupr1b	0
BP	GO:0048145	regulation of fibroblast proliferation	2/646	56/11595	0.827038388095147	0.987851408002536	gene-nupr1b/gene-LOC122869242	2	LOC122869242/nupr1b	2	gene-LOC122869242/gene-nupr1b	0
BP	GO:1901223	negative regulation of NIK/NF-kappaB signaling	2/646	56/11595	0.827038388095147	0.987851408002536	gene-ifi35/gene-LOC122869242	2	ifi35/LOC122869242	2	gene-ifi35/gene-LOC122869242	0
BP	GO:0006575	cellular modified amino acid metabolic process	3/646	80/11595	0.830533204991856	0.989852741359789	gene-bbox1/gene-LOC122874604/gene-aldh1l2	3	aldh1l2/bbox1/LOC122874604	1	gene-aldh1l2	2
BP	GO:0007098	centrosome cycle	1/646	31/11595	0.831272711808202	0.989852741359789	gene-si:ch211-286b5.4	1	si:ch211-286b5.4	1	gene-si:ch211-286b5.4	0
BP	GO:0007292	female gamete generation	1/646	31/11595	0.831272711808202	0.989852741359789	gene-tdrd6	1	tdrd6	1	gene-tdrd6	0
BP	GO:0018394	peptidyl-lysine acetylation	1/646	31/11595	0.831272711808202	0.989852741359789	gene-snai2	1	snai2	0	-	1
BP	GO:0003006	developmental process involved in reproduction	5/646	125/11595	0.832990793023793	0.989852741359789	gene-tdrd6/gene-tnca/gene-LOC122865494/gene-odad2/gene-nupr1b	5	LOC122865494/nupr1b/odad2/tdrd6/tnca	3	gene-LOC122865494/gene-nupr1b/gene-tdrd6	2
BP	GO:0001578	microtubule bundle formation	2/646	57/11595	0.834468880797497	0.989852741359789	gene-tppp3/gene-odad3	2	odad3/tppp3	0	-	2
BP	GO:0032640	tumor necrosis factor production	2/646	57/11595	0.834468880797497	0.989852741359789	gene-LOC122878127/gene-LOC122869242	2	LOC122869242/LOC122878127	2	gene-LOC122869242/gene-LOC122878127	0
BP	GO:0032680	regulation of tumor necrosis factor production	2/646	57/11595	0.834468880797497	0.989852741359789	gene-LOC122878127/gene-LOC122869242	2	LOC122869242/LOC122878127	2	gene-LOC122869242/gene-LOC122878127	0
BP	GO:0071706	tumor necrosis factor superfamily cytokine production	2/646	57/11595	0.834468880797497	0.989852741359789	gene-LOC122878127/gene-LOC122869242	2	LOC122869242/LOC122878127	2	gene-LOC122869242/gene-LOC122878127	0
BP	GO:1903555	regulation of tumor necrosis factor superfamily cytokine production	2/646	57/11595	0.834468880797497	0.989852741359789	gene-LOC122878127/gene-LOC122869242	2	LOC122869242/LOC122878127	2	gene-LOC122869242/gene-LOC122878127	0
BP	GO:0001906	cell killing	1/646	32/11595	0.840698328218778	0.990129314933394	gene-tusc2a	1	tusc2a	1	gene-tusc2a	0
BP	GO:0007159	leukocyte cell-cell adhesion	1/646	32/11595	0.840698328218778	0.990129314933394	gene-LOC122877917	1	LOC122877917	1	gene-LOC122877917	0
BP	GO:0048882	lateral line development	1/646	32/11595	0.840698328218778	0.990129314933394	gene-gpc4	1	gpc4	0	-	1
BP	GO:0071897	DNA biosynthetic process	1/646	32/11595	0.840698328218778	0.990129314933394	gene-LOC122877917	1	LOC122877917	1	gene-LOC122877917	0
BP	GO:0072507	divalent inorganic cation homeostasis	1/646	32/11595	0.840698328218778	0.990129314933394	gene-swap70a	1	swap70a	0	-	1
BP	GO:0031399	regulation of protein modification process	11/646	253/11595	0.840963636070259	0.990129314933394	gene-swap70a/gene-dok7b/gene-znf703/gene-LOC122878127/gene-snai2/gene-gfi1aa/gene-LOC122886518/gene-klhl43/gene-nupr1b/gene-LOC122869242/gene-LOC122871413	11	dok7b/gfi1aa/klhl43/LOC122869242/LOC122871413/LOC122878127/LOC122886518/nupr1b/snai2/swap70a/znf703	7	gene-gfi1aa/gene-klhl43/gene-LOC122869242/gene-LOC122871413/gene-LOC122878127/gene-LOC122886518/gene-nupr1b	4
BP	GO:0006302	double-strand break repair	2/646	58/11595	0.841609917693384	0.990129314933394	gene-LOC122871826/gene-nhej1	2	LOC122871826/nhej1	0	-	2
BP	GO:0006352	DNA-templated transcription, initiation	2/646	58/11595	0.841609917693384	0.990129314933394	gene-LOC122888306/gene-LOC122887722	2	LOC122887722/LOC122888306	2	gene-LOC122887722/gene-LOC122888306	0
BP	GO:0007281	germ cell development	2/646	58/11595	0.841609917693384	0.990129314933394	gene-tdrd6/gene-odad2	2	odad2/tdrd6	1	gene-tdrd6	1
BP	GO:0051050	positive regulation of transport	2/646	58/11595	0.841609917693384	0.990129314933394	gene-gck/gene-LOC122878127	2	gck/LOC122878127	2	gene-gck/gene-LOC122878127	0
BP	GO:0051223	regulation of protein transport	2/646	58/11595	0.841609917693384	0.990129314933394	gene-gck/gene-LOC122878127	2	gck/LOC122878127	2	gene-gck/gene-LOC122878127	0
BP	GO:0090087	regulation of peptide transport	2/646	58/11595	0.841609917693384	0.990129314933394	gene-gck/gene-LOC122878127	2	gck/LOC122878127	2	gene-gck/gene-LOC122878127	0
BP	GO:0043124	negative regulation of I-kappaB kinase/NF-kappaB signaling	2/646	59/11595	0.848470627118895	0.994449206933	gene-LOC122874995/gene-LOC122869242	2	LOC122869242/LOC122874995	2	gene-LOC122869242/gene-LOC122874995	0
BP	GO:0060485	mesenchyme development	3/646	83/11595	0.848688911995606	0.994449206933	gene-snai1a/gene-snai2/gene-phldb2b	3	phldb2b/snai1a/snai2	0	-	3
BP	GO:0043269	regulation of ion transport	12/646	276/11595	0.849542460267824	0.994449206933	gene-LOC122884571/gene-gck/gene-LOC122878127/gene-scn1laa/gene-LOC122886797/gene-kcnj15/gene-kcnh5b/gene-LOC122864783/gene-kcng2/gene-kcnj2a/gene-cacna1g/gene-cacna1c	12	cacna1c/cacna1g/gck/kcng2/kcnh5b/kcnj15/kcnj2a/LOC122864783/LOC122878127/LOC122884571/LOC122886797/scn1laa	8	gene-gck/gene-kcng2/gene-kcnh5b/gene-kcnj2a/gene-LOC122878127/gene-LOC122884571/gene-LOC122886797/gene-scn1laa	4
BP	GO:0010038	response to metal ion	1/646	33/11595	0.849598170817643	0.994449206933	gene-nptx1l	1	nptx1l	1	gene-nptx1l	0
BP	GO:0014902	myotube differentiation	1/646	33/11595	0.849598170817643	0.994449206933	gene-myofl	1	myofl	0	-	1
BP	GO:0022900	electron transport chain	1/646	33/11595	0.849598170817643	0.994449206933	gene-LOC122869272	1	LOC122869272	1	gene-LOC122869272	0
BP	GO:0044403	biological process involved in symbiotic interaction	1/646	33/11595	0.849598170817643	0.994449206933	gene-tusc2a	1	tusc2a	1	gene-tusc2a	0
BP	GO:0015698	inorganic anion transport	3/646	84/11595	0.854353653591333	0.994449206933	gene-slc20a1a/gene-ttyh1/gene-LOC122871849	3	LOC122871849/slc20a1a/ttyh1	1	gene-ttyh1	2
BP	GO:0060041	retina development in camera-type eye	3/646	84/11595	0.854353653591333	0.994449206933	gene-zgc:162144/gene-id2a/gene-rpgrb	3	id2a/rpgrb/zgc:162144	1	gene-zgc:162144	2
BP	GO:0009952	anterior/posterior pattern specification	2/646	60/11595	0.855060020407515	0.994449206933	gene-tdrd6/gene-LOC122869123	2	LOC122869123/tdrd6	2	gene-LOC122869123/gene-tdrd6	0
BP	GO:0031503	protein-containing complex localization	2/646	60/11595	0.855060020407515	0.994449206933	gene-si:ch211-286b5.4/gene-nptx1l	2	nptx1l/si:ch211-286b5.4	2	gene-nptx1l/gene-si:ch211-286b5.4	0
BP	GO:0032088	negative regulation of NF-kappaB transcription factor activity	2/646	60/11595	0.855060020407515	0.994449206933	gene-LOC122877917/gene-LOC122869242	2	LOC122869242/LOC122877917	2	gene-LOC122869242/gene-LOC122877917	0
BP	GO:0048872	homeostasis of number of cells	2/646	60/11595	0.855060020407515	0.994449206933	gene-kdm6bb/gene-flvcr1	2	flvcr1/kdm6bb	1	gene-flvcr1	1
BP	GO:0002449	lymphocyte mediated immunity	1/646	34/11595	0.858001525051495	0.994449206933	gene-swap70a	1	swap70a	0	-	1
BP	GO:0003407	neural retina development	1/646	34/11595	0.858001525051495	0.994449206933	gene-rpgrb	1	rpgrb	0	-	1
BP	GO:0007498	mesoderm development	1/646	34/11595	0.858001525051495	0.994449206933	gene-dact2	1	dact2	0	-	1
BP	GO:0009156	ribonucleoside monophosphate biosynthetic process	1/646	34/11595	0.858001525051495	0.994449206933	gene-ampd3a	1	ampd3a	0	-	1
BP	GO:0015711	organic anion transport	1/646	34/11595	0.858001525051495	0.994449206933	gene-LOC122871427	1	LOC122871427	1	gene-LOC122871427	0
BP	GO:0051225	spindle assembly	1/646	34/11595	0.858001525051495	0.994449206933	gene-LOC122877630	1	LOC122877630	1	gene-LOC122877630	0
BP	GO:0070371	ERK1 and ERK2 cascade	1/646	34/11595	0.858001525051495	0.994449206933	gene-LOC122877917	1	LOC122877917	1	gene-LOC122877917	0
BP	GO:0070372	regulation of ERK1 and ERK2 cascade	1/646	34/11595	0.858001525051495	0.994449206933	gene-LOC122877917	1	LOC122877917	1	gene-LOC122877917	0
BP	GO:1903046	meiotic cell cycle process	1/646	34/11595	0.858001525051495	0.994449206933	gene-terb1	1	terb1	1	gene-terb1	0
BP	GO:0030900	forebrain development	2/646	61/11595	0.86138697659595	0.996217449257699	gene-ndnf/gene-mrtfbb	2	mrtfbb/ndnf	0	-	2
BP	GO:0070201	regulation of establishment of protein localization	2/646	61/11595	0.86138697659595	0.996217449257699	gene-gck/gene-LOC122878127	2	gck/LOC122878127	2	gene-gck/gene-LOC122878127	0
BP	GO:0006479	protein methylation	1/646	35/11595	0.865936047568296	0.996217449257699	gene-gfi1aa	1	gfi1aa	1	gene-gfi1aa	0
BP	GO:0008203	cholesterol metabolic process	1/646	35/11595	0.865936047568296	0.996217449257699	gene-nfe2l1a	1	nfe2l1a	1	gene-nfe2l1a	0
BP	GO:0008213	protein alkylation	1/646	35/11595	0.865936047568296	0.996217449257699	gene-gfi1aa	1	gfi1aa	1	gene-gfi1aa	0
BP	GO:0031023	microtubule organizing center organization	1/646	35/11595	0.865936047568296	0.996217449257699	gene-si:ch211-286b5.4	1	si:ch211-286b5.4	1	gene-si:ch211-286b5.4	0
BP	GO:1901606	alpha-amino acid catabolic process	1/646	35/11595	0.865936047568296	0.996217449257699	gene-ddah1	1	ddah1	0	-	1
BP	GO:0017038	protein import	2/646	62/11595	0.867460229191776	0.996217449257699	gene-LOC122878127/gene-il12rb2l	2	il12rb2l/LOC122878127	2	gene-il12rb2l/gene-LOC122878127	0
BP	GO:0043065	positive regulation of apoptotic process	2/646	62/11595	0.867460229191776	0.996217449257699	gene-nupr1b/gene-phlda1	2	nupr1b/phlda1	1	gene-nupr1b	1
BP	GO:0043068	positive regulation of programmed cell death	2/646	62/11595	0.867460229191776	0.996217449257699	gene-nupr1b/gene-phlda1	2	nupr1b/phlda1	1	gene-nupr1b	1
BP	GO:0007249	I-kappaB kinase/NF-kappaB signaling	3/646	87/11595	0.870250199867859	0.996217449257699	gene-LOC122874995/gene-rel/gene-LOC122869242	3	LOC122869242/LOC122874995/rel	3	gene-LOC122869242/gene-LOC122874995/gene-rel	0
BP	GO:0048193	Golgi vesicle transport	3/646	87/11595	0.870250199867859	0.996217449257699	gene-si:dkey-13n15.2/gene-LOC122879486/gene-dop1b	3	dop1b/LOC122879486/si:dkey-13n15.2	3	gene-dop1b/gene-LOC122879486/gene-si:dkey-13n15.2	0
BP	GO:1902533	positive regulation of intracellular signal transduction	4/646	111/11595	0.873027305263405	0.996217449257699	gene-dok6/gene-nupr1b/gene-ifi35/gene-LOC122871413	4	dok6/ifi35/LOC122871413/nupr1b	4	gene-dok6/gene-ifi35/gene-LOC122871413/gene-nupr1b	0
BP	GO:1904888	cranial skeletal system development	2/646	63/11595	0.87328835482128	0.996217449257699	gene-pthlha/gene-cacna1c	2	cacna1c/pthlha	0	-	2
BP	GO:0002790	peptide secretion	1/646	36/11595	0.873427856674774	0.996217449257699	gene-gck	1	gck	1	gene-gck	0
BP	GO:0009060	aerobic respiration	1/646	36/11595	0.873427856674774	0.996217449257699	gene-LOC122882574	1	LOC122882574	1	gene-LOC122882574	0
BP	GO:0009306	protein secretion	1/646	36/11595	0.873427856674774	0.996217449257699	gene-gck	1	gck	1	gene-gck	0
BP	GO:0021915	neural tube development	1/646	36/11595	0.873427856674774	0.996217449257699	gene-pard6gb	1	pard6gb	0	-	1
BP	GO:0030217	T cell differentiation	1/646	36/11595	0.873427856674774	0.996217449257699	gene-znf296	1	znf296	0	-	1
BP	GO:0035592	establishment of protein localization to extracellular region	1/646	36/11595	0.873427856674774	0.996217449257699	gene-gck	1	gck	1	gene-gck	0
BP	GO:0048565	digestive tract development	1/646	36/11595	0.873427856674774	0.996217449257699	gene-pard6gb	1	pard6gb	0	-	1
BP	GO:0061053	somite development	1/646	36/11595	0.873427856674774	0.996217449257699	gene-LOC122869123	1	LOC122869123	1	gene-LOC122869123	0
BP	GO:0071692	protein localization to extracellular region	1/646	36/11595	0.873427856674774	0.996217449257699	gene-gck	1	gck	1	gene-gck	0
BP	GO:1990138	neuron projection extension	1/646	36/11595	0.873427856674774	0.996217449257699	gene-znf296	1	znf296	0	-	1
BP	GO:0050777	negative regulation of immune response	2/646	64/11595	0.878879763589593	0.998986004338753	gene-LOC122874995/gene-LOC122869242	2	LOC122869242/LOC122874995	2	gene-LOC122869242/gene-LOC122874995	0
BP	GO:0006261	DNA-dependent DNA replication	1/646	37/11595	0.880501617777645	0.998986004338753	gene-LOC122868820	1	LOC122868820	0	-	1
BP	GO:0006898	receptor-mediated endocytosis	1/646	37/11595	0.880501617777645	0.998986004338753	gene-wdr54	1	wdr54	0	-	1
BP	GO:0009161	ribonucleoside monophosphate metabolic process	1/646	37/11595	0.880501617777645	0.998986004338753	gene-ampd3a	1	ampd3a	0	-	1
BP	GO:0032386	regulation of intracellular transport	1/646	37/11595	0.880501617777645	0.998986004338753	gene-LOC122878127	1	LOC122878127	1	gene-LOC122878127	0
BP	GO:0046165	alcohol biosynthetic process	1/646	37/11595	0.880501617777645	0.998986004338753	gene-itpkcb	1	itpkcb	0	-	1
BP	GO:0048925	lateral line system development	1/646	37/11595	0.880501617777645	0.998986004338753	gene-gpc4	1	gpc4	0	-	1
BP	GO:0051098	regulation of binding	1/646	37/11595	0.880501617777645	0.998986004338753	gene-LOC122877917	1	LOC122877917	1	gene-LOC122877917	0
BP	GO:0034220	ion transmembrane transport	12/646	287/11595	0.882576158927166	0.999999977589757	gene-LOC122870126/gene-LOC122884571/gene-scn1laa/gene-LOC122886797/gene-kcnj15/gene-kcnh5b/gene-LOC122864783/gene-kcng2/gene-kcnj2a/gene-cacna1g/gene-cacna1c/gene-LOC122871427	12	cacna1c/cacna1g/kcng2/kcnh5b/kcnj15/kcnj2a/LOC122864783/LOC122870126/LOC122871427/LOC122884571/LOC122886797/scn1laa	8	gene-kcng2/gene-kcnh5b/gene-kcnj2a/gene-LOC122870126/gene-LOC122871427/gene-LOC122884571/gene-LOC122886797/gene-scn1laa	4
BP	GO:0090407	organophosphate biosynthetic process	10/646	245/11595	0.882598857922332	0.999999977589757	gene-dut/gene-ampd3a/gene-LOC122874604/gene-itpkcb/gene-zgc:162144/gene-nme5/gene-LOC122882904/gene-acaca/gene-cmpk2/gene-LOC122869764	10	acaca/ampd3a/cmpk2/dut/itpkcb/LOC122869764/LOC122874604/LOC122882904/nme5/zgc:162144	5	gene-acaca/gene-cmpk2/gene-LOC122869764/gene-nme5/gene-zgc:162144	5
BP	GO:0098662	inorganic cation transmembrane transport	2/646	65/11595	0.884242690998084	0.999999977589757	gene-LOC122870126/gene-LOC122886797	2	LOC122870126/LOC122886797	2	gene-LOC122870126/gene-LOC122886797	0
BP	GO:1901565	organonitrogen compound catabolic process	16/646	371/11595	0.886114945364766	0.999999977589757	gene-dut/gene-LOC122872164/gene-hmox2a/gene-hal/gene-gda/gene-ddah1/gene-pde4ba/gene-aldh5a1/gene-smpdl3b/gene-LOC122883755/gene-enosf1/gene-LOC122866402/gene-nupr1b/gene-hmox1a/gene-usp18/gene-aldh1l2	16	aldh1l2/aldh5a1/ddah1/dut/enosf1/gda/hal/hmox1a/hmox2a/LOC122866402/LOC122872164/LOC122883755/nupr1b/pde4ba/smpdl3b/usp18	11	gene-aldh1l2/gene-aldh5a1/gene-enosf1/gene-gda/gene-hal/gene-hmox1a/gene-LOC122866402/gene-LOC122872164/gene-LOC122883755/gene-nupr1b/gene-usp18	5
BP	GO:0016125	sterol metabolic process	1/646	38/11595	0.887180624086318	0.999999977589757	gene-nfe2l1a	1	nfe2l1a	1	gene-nfe2l1a	0
BP	GO:0019751	polyol metabolic process	1/646	38/11595	0.887180624086318	0.999999977589757	gene-itpkcb	1	itpkcb	0	-	1
BP	GO:0072659	protein localization to plasma membrane	1/646	38/11595	0.887180624086318	0.999999977589757	gene-LOC122878127	1	LOC122878127	1	gene-LOC122878127	0
BP	GO:0010942	positive regulation of cell death	2/646	66/11595	0.889385191275857	0.999999977589757	gene-nupr1b/gene-phlda1	2	nupr1b/phlda1	1	gene-nupr1b	1
BP	GO:0010564	regulation of cell cycle process	4/646	115/11595	0.889739941338725	0.999999977589757	gene-LOC122877917/gene-LOC122865952/gene-LOC122868820/gene-si:ch211-63p21.8	4	LOC122865952/LOC122868820/LOC122877917/si:ch211-63p21.8	2	gene-LOC122877917/gene-si:ch211-63p21.8	2
BP	GO:0018298	protein-chromophore linkage	1/646	39/11595	0.893486872839476	0.999999977589757	gene-LOC122887291	1	LOC122887291	1	gene-LOC122887291	0
BP	GO:0042176	regulation of protein catabolic process	1/646	39/11595	0.893486872839476	0.999999977589757	gene-nupr1b	1	nupr1b	1	gene-nupr1b	0
BP	GO:0043410	positive regulation of MAPK cascade	1/646	39/11595	0.893486872839476	0.999999977589757	gene-dok6	1	dok6	1	gene-dok6	0
BP	GO:0060042	retina morphogenesis in camera-type eye	1/646	39/11595	0.893486872839476	0.999999977589757	gene-rpgrb	1	rpgrb	0	-	1
BP	GO:1902652	secondary alcohol metabolic process	1/646	39/11595	0.893486872839476	0.999999977589757	gene-nfe2l1a	1	nfe2l1a	1	gene-nfe2l1a	0
BP	GO:0006913	nucleocytoplasmic transport	2/646	67/11595	0.894315131993318	0.999999977589757	gene-LOC122878127/gene-il12rb2l	2	il12rb2l/LOC122878127	2	gene-il12rb2l/gene-LOC122878127	0
BP	GO:0051169	nuclear transport	2/646	67/11595	0.894315131993318	0.999999977589757	gene-LOC122878127/gene-il12rb2l	2	il12rb2l/LOC122878127	2	gene-il12rb2l/gene-LOC122878127	0
BP	GO:0031325	positive regulation of cellular metabolic process	19/646	436/11595	0.894559208539181	0.999999977589757	gene-dok7b/gene-znf703/gene-ddah1/gene-LOC122878127/gene-LOC122877917/gene-otx5/gene-LOC122880569/gene-LOC122881737/gene-rel/gene-LOC122886528/gene-snai2/gene-LOC122886518/gene-mef2ca/gene-nupr1b/gene-mrtfbb/gene-cbx8a/gene-LOC122871423/gene-dcn/gene-LOC122871413	19	cbx8a/dcn/ddah1/dok7b/LOC122871413/LOC122871423/LOC122877917/LOC122878127/LOC122880569/LOC122881737/LOC122886518/LOC122886528/mef2ca/mrtfbb/nupr1b/otx5/rel/snai2/znf703	12	gene-dcn/gene-LOC122871413/gene-LOC122871423/gene-LOC122877917/gene-LOC122878127/gene-LOC122880569/gene-LOC122886518/gene-LOC122886528/gene-mef2ca/gene-nupr1b/gene-otx5/gene-rel	7
BP	GO:0051301	cell division	11/646	271/11595	0.895776977399152	0.999999977589757	gene-LOC122879039/gene-mdkb/gene-LOC122877630/gene-spartb/gene-LOC122884209/gene-LOC122888753/gene-tgfb3/gene-pard6gb/gene-ccnf/gene-si:ch211-63p21.8/gene-sapcd1	11	ccnf/LOC122877630/LOC122879039/LOC122884209/LOC122888753/mdkb/pard6gb/sapcd1/si:ch211-63p21.8/spartb/tgfb3	5	gene-LOC122877630/gene-LOC122888753/gene-sapcd1/gene-si:ch211-63p21.8/gene-spartb	6
BP	GO:0044772	mitotic cell cycle phase transition	2/646	68/11595	0.899040189836032	0.999999977589757	gene-LOC122877917/gene-LOC122865952	2	LOC122865952/LOC122877917	1	gene-LOC122877917	1
BP	GO:0006418	tRNA aminoacylation for protein translation	1/646	40/11595	0.899441137303451	0.999999977589757	gene-LOC122866314	1	LOC122866314	1	gene-LOC122866314	0
BP	GO:0006888	endoplasmic reticulum to Golgi vesicle-mediated transport	1/646	40/11595	0.899441137303451	0.999999977589757	gene-si:dkey-13n15.2	1	si:dkey-13n15.2	1	gene-si:dkey-13n15.2	0
BP	GO:0035082	axoneme assembly	1/646	40/11595	0.899441137303451	0.999999977589757	gene-odad3	1	odad3	0	-	1
BP	GO:0048863	stem cell differentiation	2/646	69/11595	0.90356784742665	0.999999977589757	gene-snai2/gene-tgfb3	2	snai2/tgfb3	0	-	2
BP	GO:0007420	brain development	6/646	165/11595	0.903723779995648	0.999999977589757	gene-LOC122873501/gene-znf703/gene-srrm4/gene-ndnf/gene-trim69/gene-mrtfbb	6	LOC122873501/mrtfbb/ndnf/srrm4/trim69/znf703	2	gene-srrm4/gene-trim69	4
BP	GO:0002697	regulation of immune effector process	1/646	41/11595	0.905063034776577	0.999999977589757	gene-LOC122878212	1	LOC122878212	1	gene-LOC122878212	0
BP	GO:0006119	oxidative phosphorylation	1/646	41/11595	0.905063034776577	0.999999977589757	gene-nupr1b	1	nupr1b	1	gene-nupr1b	0
[truncated: 888 more rows]
